# Supplementary material for: The Role of Alternative Splicing and Differential Gene Expression in Cichlid Adaptive Radiation
Source: Oxford University Press journal article supplement (doi:10.1093/gbe/evx204), 2017-09-26
Supplement: supp_file_2_evx204.xlsx [file supp_file_2_evx204.xlsx]

## Sheet: DE_genes_in_all_comparisons
gene	ChGp	SdGp	LdCh	LdGp	LdSd	LdTd	LdTm	SdCh	SdTm	TdCh	TdGp	TdSd	TdTm	TmCh	TmGp
on.gene.LG1.286	0.0234318	NA	NA	0.00477638	0.00689014	NA	0.00534392	0.0317936	NA	NA	0.000399521	0.000386154	0.000277579	0.0234535	NA
on.gene.LG12.829	0.00849549	NA	NA	0.00623041	0.00152448	NA	0.0116795	0.00164544	NA	NA	0.0335461	0.0119293	0.0456534	0.0127754	NA
on.gene.LG14.153	0.0292672	0.0298474	0.025876	NA	0.01511	NA	0.018253	NA	NA	0.030915	NA	0.0285023	0.0250073	NA	0.0203686
on.gene.LG15.180	0.0137904	NA	NA	0.000137626	0.000277496	NA	0.000143568	0.028099	NA	NA	0.016392	0.0373871	0.0169251	0.0156899	NA
on.gene.LG16-21.739	0.00168704	0.00855314	0.00412291	NA	0.012612	NA	0.0316233	NA	NA	0.0134364	NA	0.000244628	0.00283232	NA	0.0129081
on.gene.LG19.89	0.00626249	0.00145463	0.00669663	NA	0.00224686	NA	0.0206125	NA	NA	0.00969271	NA	0.00525994	0.0333483	NA	0.00225768
on.gene.LG20.454	0.0200425	0.011097	NA	0.000684515	NA	0.00197342	0.000215401	NA	0.0030583	0.0362906	NA	0.0184876	NA	0.00851903	NA
on.gene.LG3.209	0.000805056	0.00971884	NA	0.000567392	NA	0.00690684	0.00072306	NA	0.00861529	0.00627763	NA	0.0492065	NA	0.000752547	NA
on.gene.LG4.2770003	0.0151338	NA	0.0499998	NA	NA	0.0215551	0.0454889	0.00226966	0.00688495	NA	0.0291206	0.00697685	NA	NA	0.0235826
on.gene.LG7.1194	0.00342918	0.00245695	NA	0.00720039	NA	0.00284227	0.00327377	NA	0.00942512	0.000689165	NA	0.00143503	NA	0.00104705	NA
on.gene.LG7.816	0.0295461	NA	0.00267855	NA	NA	0.00974973	0.0183632	0.0311705	0.0124366	NA	0.00942024	0.00963338	NA	NA	0.00947979
on.gene.UNK12.8	0.00908094	NA	NA	0.000545465	0.000817066	0.00100987	NA	0.0134537	0.00562219	0.0117714	NA	NA	0.00455421	NA	0.00281095
on.gene.UNK2963.1	0.0115805	0.0011386	NA	0.000187067	NA	0.00111912	0.000188871	NA	0.000699234	0.0356648	NA	0.0032943	NA	0.00974114	NA
on.gene.UNK3.26	0.000830727	NA	NA	0.00226447	0.0195559	NA	0.00271333	0.00657466	NA	NA	0.00595944	0.0457202	0.00542152	0.000679073	NA
on.gene.UNK526.2	0.00734576	NA	0.0107306	NA	NA	0.0288005	0.00456973	0.00361962	0.0101177	NA	0.0233454	0.000232432	NA	NA	0.00299791
on.gene.UNK797.1	0.0232417	NA	0.0320014	NA	NA	0.0167868	0.0117433	0.00352245	0.00136156	NA	0.00662211	0.00151975	NA	NA	0.0426325
on.gene.LG12.732	NA	0.0144556	0.0101874	0.00504778	NA	NA	0.0179918	0.0138807	0.032525	0.00541981	0.0046115	NA	0.0124167	NA	NA
on.gene.LG13.429	NA	0.0381809	0.000362413	0.000589846	NA	0.000261424	NA	0.034929	NA	NA	NA	0.0254155	0.00482316	0.00693226	0.00907999
on.gene.LG18.579	NA	0.00844727	0.0189758	0.0205514	NA	0.0229426	NA	0.00337685	NA	NA	NA	0.0107593	0.015762	0.0243225	0.0297277
on.gene.UNK343.1	NA	0.00495328	NA	NA	0.0292943	0.0128511	0.0152226	0.0333649	NA	0.0121667	0.00120161	NA	NA	0.0171017	0.00122843
on.gene.UNK111.15	NA	NA	0.00443974	0.00430921	0.002034	NA	NA	NA	0.00252467	0.0276505	0.0347747	0.0225061	NA	0.00391493	0.00445446
on.gene.UNK2869.1	NA	NA	0.00147816	0.0221603	0.00141118	NA	NA	NA	0.039087	0.0114186	0.00109336	0.016322	NA	0.0310841	0.00136539
on.gene.LG1.1580001	0.0359869	NA	NA	0.000407122	0.000120215	NA	NA	0.018301	0.00495263	NA	0.0151974	0.0069282	NA	NA	0.00865085
on.gene.LG1.177	0.00145665	NA	NA	0.00236109	0.00248127	NA	NA	0.00106964	0.000121505	NA	0.00351723	0.00339227	NA	NA	0.000128844
on.gene.LG1.579	0.000349579	NA	NA	0.00165319	0.000161677	0.00607242	0.00661274	0.000878373	NA	0.0179905	NA	NA	NA	0.0226434	NA
on.gene.LG1.675	0.00250329	NA	0.00914452	NA	NA	0.0013687	0.0242296	0.000116307	0.000861076	NA	0.00651375	NA	NA	NA	0.00107372
on.gene.LG11.85	0.00950339	0.000490136	NA	0.00698936	NA	0.0216079	NA	NA	NA	0.0203787	NA	0.000806907	0.000869356	NA	0.000291752
on.gene.LG11.865	0.00445364	NA	0.0360037	NA	NA	0.0288111	NA	0.000512419	NA	NA	0.00382287	0.000451751	0.000239845	0.000290534	NA
on.gene.LG12.204	0.0462619	NA	NA	0.00419186	0.0163563	NA	NA	0.00136732	0.012857	NA	0.0376287	0.000137054	NA	NA	0.00798478
on.gene.LG12.321	0.00470615	0.00384171	NA	0.000808898	NA	0.000187507	NA	NA	NA	0.000854501	NA	0.000514458	0.0107723	NA	0.0276925
on.gene.LG12.338	0.00171323	NA	NA	0.000290532	0.00192676	NA	0.00661274	0.00806725	NA	NA	0.00824167	0.0388623	NA	0.0228687	NA
on.gene.LG12.694	0.0353623	NA	NA	0.000611919	0.000143087	0.0198176	NA	0.016536	0.000203041	NA	NA	NA	0.0184816	NA	0.00069831
on.gene.LG13.128	0.00393101	NA	NA	0.00836595	0.0471024	NA	0.0311192	0.0201273	NA	NA	0.00100114	0.00685379	0.0476709	NA	NA
on.gene.LG13.333	0.00337023	NA	NA	0.00849415	0.00696546	0.0420089	0.0219695	0.00177649	NA	0.0132067	NA	NA	NA	0.00706749	NA
on.gene.LG13.641	0.000324517	0.0364008	NA	0.0178134	NA	0.0298414	NA	NA	NA	0.000281644	NA	0.0416215	0.000519185	NA	0.000396349
on.gene.LG13.680	0.00884754	NA	NA	NA	NA	0.0105931	0.0135838	0.0387584	0.00802099	NA	0.00819677	0.00545611	NA	NA	0.0376531
on.gene.LG14.207	0.00414859	0.0153096	NA	0.0137898	NA	0.00493218	NA	NA	NA	0.000759425	NA	0.00270597	0.00188629	NA	0.00670051
on.gene.LG14.228	0.000583193	0.000365546	NA	0.00175297	NA	NA	0.0176355	NA	0.00324077	0.0312199	NA	0.0225344	NA	0.0059781	NA
on.gene.LG14.501	0.0189206	0.0131253	NA	0.008753	NA	0.0143879	NA	NA	NA	0.0223296	NA	0.013318	0.021775	NA	0.0153689
on.gene.LG14.641	0.00415817	0.00565629	NA	0.0478745	NA	0.0421536	NA	NA	NA	0.0019228	NA	0.00219886	0.00889254	NA	0.0128938
on.gene.LG15.2	0.00037344	NA	NA	0.000434113	0.000269495	NA	NA	0.000176213	0.00824524	NA	0.000386419	0.000196381	NA	NA	0.0105061
on.gene.LG15.206	0.00791436	0.000409541	NA	0.00791149	NA	NA	0.0305548	NA	0.00132446	NA	0.00418951	NA	0.0132696	0.0259988	NA
on.gene.LG15.638	0.0393111	0.00125552	NA	0.0395456	NA	0.00105744	NA	NA	NA	0.00107336	NA	0.00833666	0.0045626	NA	0.0146541
on.gene.LG15.678	0.00760113	NA	NA	0.000108629	0.000473399	NA	NA	0.0251765	0.0193967	NA	0.000167657	0.000628532	NA	NA	0.00419139
on.gene.LG15.741	0.0160538	NA	NA	0.0130215	0.0435765	0.000433902	NA	0.0444595	NA	0.000361666	NA	NA	0.00127665	NA	0.029542
on.gene.LG16-21.709	0.00349945	NA	NA	0.00863397	0.0090773	NA	NA	0.0250615	0.046562	NA	0.0492889	0.000158573	NA	NA	0.00215245
on.gene.LG17.85	0.0304992	0.0461595	0.0260094	NA	0.0239519	NA	NA	NA	0.0433846	0.0185594	NA	0.0253135	NA	0.0355573	NA
on.gene.LG18.363	0.0415894	0.000318217	NA	NA	0.000690801	0.000519599	NA	NA	0.0041424	NA	0.000116178	NA	0.014636	0.000239748	NA
on.gene.LG18.429	0.0137937	0.00198107	0.0154432	NA	0.00104433	0.000185593	0.000667674	NA	NA	NA	0.000216375	NA	NA	NA	0.000656282
on.gene.LG18.633	0.00274062	NA	NA	0.032941	0.0477329	NA	NA	0.00259727	0.0267509	NA	0.00220471	0.00226798	NA	NA	0.0168029
on.gene.LG18.650	0.0391817	NA	NA	0.0107719	NA	0.0060492	NA	0.000408135	0.000315839	0.0183053	NA	NA	0.0124896	NA	0.0231495
on.gene.LG19.197	0.0200425	NA	0.0390523	NA	NA	0.0109567	0.00739701	0.00273717	0.0315478	NA	0.0295473	0.0050791	NA	NA	NA
on.gene.LG19.638	0.00391937	0.00572693	NA	0.000495474	NA	NA	0.00396697	NA	0.023632	NA	0.00140594	NA	0.00767735	0.020011	NA
on.gene.LG19.657	0.0329449	0.0366701	NA	0.0377781	NA	0.0355433	NA	NA	NA	0.0394324	NA	0.00629926	0.0317783	NA	0.042346
on.gene.LG19.749	0.00427756	NA	NA	0.0114248	0.00846299	NA	NA	0.00224516	0.0377661	NA	0.00132271	0.000603436	NA	NA	0.0381439
on.gene.LG2.293	0.00215024	NA	NA	0.00126685	0.00117558	0.00703302	NA	0.00157752	0.0414254	0.00769095	NA	NA	NA	NA	0.0288386
on.gene.LG2.567	0.00020911	NA	NA	0.00319289	0.00339717	NA	NA	0.0001093	0.0103006	NA	0.00022775	0.000143276	NA	NA	0.00749662
on.gene.LG2.587	0.000159648	0.0466354	NA	NA	0.000168907	0.00311365	0.022431	0.0481435	NA	NA	0.0108902	NA	NA	NA	0.00690407
on.gene.LG20.23	0.00126754	NA	NA	0.000693048	0.0184771	NA	NA	0.00995712	0.0286141	NA	0.0123793	0.000221017	NA	NA	0.00064539
on.gene.LG20.601	0.0151438	0.0269827	NA	0.0215586	NA	0.00918604	NA	NA	NA	0.00425418	NA	0.00673839	0.018675	NA	0.0450137
on.gene.LG22.117	0.00340456	NA	NA	0.02297	NA	NA	0.0409948	0.0170071	NA	NA	0.00624638	0.0314794	0.00897286	0.0056416	NA
on.gene.LG22.3490001	0.000488006	NA	NA	0.00105015	0.0205399	NA	NA	0.0421945	0.0392617	0.0259576	NA	NA	0.0392962	NA	0.000721006
on.gene.LG23.50	0.0306821	NA	NA	0.00832818	0.0125244	0.000990547	NA	0.0415764	0.00082796	0.00348352	NA	NA	NA	NA	0.000535842
on.gene.LG23.565	0.00102837	NA	NA	0.00343002	0.000888754	NA	NA	0.000155119	NA	NA	0.00205244	0.000345046	0.0476679	0.0286614	NA
on.gene.LG4.127	0.0379966	NA	NA	0.00248579	0.00256947	NA	NA	0.0419222	0.0272042	NA	0.00377787	0.00351665	NA	NA	0.0192086
on.gene.LG5.303	0.0141153	NA	NA	0.00400787	NA	0.00197952	NA	0.0404632	0.0361492	0.00551934	NA	NA	0.00988599	NA	0.0191627
on.gene.LG5.406	0.000604461	NA	NA	0.0103059	0.0100361	NA	NA	0.000330285	0.0391028	NA	0.000469896	0.000272435	NA	NA	0.0314867
on.gene.LG5.470	0.00629559	NA	NA	0.0316069	0.0454867	0.00178581	NA	0.00637028	NA	0.00877977	NA	NA	0.00128943	NA	0.0415301
on.gene.LG5.823	0.00638504	0.0125743	NA	0.00650597	NA	NA	0.023976	NA	0.00246202	NA	0.000143445	NA	0.000489255	0.0198738	NA
on.gene.LG5.958	0.0487779	NA	NA	0.00835171	0.00178318	NA	NA	0.0139381	0.0107697	NA	0.0130667	0.00274153	NA	NA	0.029288
on.gene.LG6.545	0.00166536	NA	NA	0.000413243	0.0240489	0.000846986	NA	0.00658408	0.000259448	0.00207354	NA	NA	NA	NA	0.0306252
on.gene.LG6.83	0.000978935	NA	NA	0.000380612	0.0284972	0.0206885	NA	0.00933088	NA	0.0304233	NA	NA	0.0112606	NA	0.00020906
on.gene.LG7.1275	0.0151362	0.000861732	NA	0.0131674	NA	0.00891319	NA	NA	NA	0.00425334	NA	0.0154605	0.0464313	NA	0.00215245
on.gene.LG7.1347	0.000464971	NA	NA	0.00030344	0.000244383	NA	NA	0.000295052	0.0167797	NA	0.00022406	0.000138099	NA	NA	0.0157874
on.gene.LG7.449	0.0287911	NA	NA	0.014691	0.00310216	0.000397232	0.000759424	0.000853156	NA	0.000582476	NA	NA	NA	0.00143868	NA
on.gene.LG7.476	0.00343901	NA	NA	0.000595623	0.0134431	0.003042	0.000542921	0.0435134	NA	0.0101207	NA	NA	NA	0.00278892	NA
on.gene.LG7.525	0.0047821	NA	NA	0.0390002	0.035196	NA	NA	0.00254296	0.0279507	NA	0.00105786	0.000470723	NA	NA	0.0281813
on.gene.LG7.848	0.0084485	NA	NA	0.0236817	0.00516132	NA	NA	0.00104446	0.000944751	NA	0.0230509	0.00387959	NA	NA	0.0054292
on.gene.LG7.8840001	0.0093487	0.00772815	0.00403468	NA	0.00170035	0.000461296	0.00908717	NA	NA	NA	0.00144221	NA	NA	NA	0.00134719
on.gene.LG8-24.441	0.0352311	NA	NA	0.00067278	0.00240753	0.000688465	NA	NA	0.000143724	0.0313814	NA	NA	0.00903832	NA	0.00900707
on.gene.UNK1.15	0.00272221	NA	NA	0.00813449	0.000529934	0.0256914	NA	NA	0.000255636	0.00623523	NA	NA	0.0118861	NA	0.00419139
on.gene.UNK109.13	0.00564995	NA	NA	0.00063465	0.00939507	0.0110994	NA	0.0464055	NA	0.00157789	NA	NA	0.000400996	NA	0.0127299
on.gene.UNK117.4	0.000269645	NA	0.00868119	NA	NA	0.0245751	NA	0.000372322	NA	NA	0.00129672	0.00185342	0.0227312	0.00800496	NA
on.gene.UNK136.9	0.000588699	NA	NA	0.00653292	0.000125909	NA	NA	0.00221039	0.000586207	NA	0.000814829	0.000303426	NA	NA	0.00307924
on.gene.UNK2.50	0.00140472	NA	NA	0.00023402	0.0289443	NA	0.00356555	0.00575056	NA	NA	0.0131359	NA	0.00249254	0.0130216	NA
on.gene.UNK2168.1	0.0144791	0.00724336	NA	0.0254689	NA	0.0053002	0.00155485	NA	NA	0.00178596	NA	0.0315446	NA	0.000541306	NA
on.gene.UNK235.4	0.0149567	0.00589826	NA	0.000525081	NA	0.00922148	0.00127609	NA	0.00843265	NA	NA	0.0486981	NA	0.0261008	NA
on.gene.UNK237.2	0.0106157	NA	NA	0.00345881	0.0153677	NA	NA	0.0374632	0.00409555	NA	0.00204527	0.00862056	NA	NA	0.00073575
on.gene.UNK243.3	0.0497636	0.0248744	0.0457603	NA	0.0125983	NA	NA	NA	0.00198374	0.0147998	NA	0.00473807	NA	0.00722483	NA
on.gene.UNK264.11	0.00352341	0.00231753	0.0340182	NA	0.0150245	0.00227101	0.0239026	NA	NA	NA	0.000124296	NA	NA	NA	0.00215035
on.gene.UNK360.2	0.014646	0.00829221	0.000558801	NA	0.000129243	NA	NA	NA	0.0013057	0.0040932	NA	0.00155783	NA	0.00605832	NA
on.gene.UNK381.1	0.00143432	NA	0.04127	NA	NA	NA	0.0236223	0.0275115	0.0204106	0.00264506	NA	NA	0.00158463	NA	0.000615623
on.gene.UNK4.56	0.0402863	NA	NA	0.0165408	0.0122922	0.00665076	NA	0.00360874	NA	0.0130995	NA	NA	0.000673471	NA	0.00263125
on.gene.UNK447.1	0.0228001	NA	NA	0.00859051	0.0174455	NA	0.0463871	0.039951	NA	NA	0.00023043	0.000339775	0.00155331	NA	NA
on.gene.UNK51.25	0.000271475	0.00015334	NA	0.000221908	NA	0.0327899	NA	NA	NA	0.0266476	NA	0.0191848	0.0192659	NA	0.000130605
on.gene.UNK534.2	0.000701079	0.00401783	NA	0.00373193	NA	0.0154969	NA	NA	NA	0.00224318	NA	0.00974321	0.0062495	NA	0.00159192
on.gene.UNK550.2	0.0164977	0.0428814	NA	0.00434819	NA	0.000412622	NA	NA	NA	0.00134927	NA	0.00377663	0.000182543	NA	0.00255521
on.gene.UNK6.26	0.00882651	NA	NA	0.00170917	0.00887909	NA	NA	0.032705	0.00454963	NA	0.00920786	0.0405138	NA	NA	0.000697373
on.gene.UNK63.3	0.0043687	NA	NA	0.00883144	0.0336513	0.0353314	0.0143709	0.0150953	NA	0.0135691	NA	NA	NA	0.00595762	NA
on.gene.UNK632.2	0.00307649	NA	0.00389825	NA	NA	0.0323814	0.000787721	0.0135362	0.00466464	NA	0.0288845	NA	NA	NA	0.000598642
on.gene.UNK65.25	0.00150134	0.00142632	0.0338842	NA	0.0203304	NA	NA	NA	0.00226956	0.00278759	NA	0.00209266	NA	0.00307081	NA
on.gene.UNK671.2	0.00691181	NA	0.0470008	NA	NA	0.00135663	NA	0.0195162	NA	NA	0.000100211	0.000435498	0.000137187	0.00957348	NA
on.gene.UNK92.1	0.0210311	NA	NA	0.00200909	NA	NA	0.00341852	0.00124022	NA	NA	0.0049379	0.000197677	0.00638039	0.0300753	NA
on.gene.LG10.177	NA	0.000849449	NA	NA	0.00184112	0.0066037	NA	0.00284102	0.00114157	0.00798765	0.00196397	NA	0.00316272	NA	NA
on.gene.LG10.347	NA	0.0116074	0.00078669	0.0193173	NA	0.00608067	0.00845808	0.00013746	0.00278745	NA	NA	0.00153945	NA	NA	NA
on.gene.LG11.961	NA	0.0131209	NA	NA	0.0136652	NA	0.0448747	0.0144447	NA	NA	NA	0.000110634	0.000808651	0.0481768	0.0252344
on.gene.LG13.600	NA	0.0102072	NA	NA	0.000823281	0.0019566	0.00399755	0.0185832	NA	0.0288672	0.0131788	NA	NA	NA	0.0181334
on.gene.LG14.437	NA	0.0333343	NA	NA	0.011159	0.00834502	0.0185634	0.0347826	NA	0.00115292	0.00360372	NA	NA	NA	0.0295247
on.gene.LG15.573	NA	0.000564614	NA	0.0314743	NA	0.0352257	NA	0.000671348	NA	NA	NA	0.000175392	0.0111239	0.0255152	0.012554
on.gene.LG15.7030001	NA	0.00554015	0.00822777	0.000353644	NA	NA	NA	0.0408782	NA	0.0249081	0.00232809	NA	NA	0.00749607	0.000409851
on.gene.LG16-21.43	NA	0.000511334	NA	NA	0.000852847	NA	0.035062	0.00395705	NA	NA	NA	0.000631263	0.0081538	0.0116809	0.0347495
on.gene.LG16-21.58	NA	0.0171921	0.00234102	NA	0.00127914	NA	0.00782434	NA	NA	0.00770599	NA	0.00738425	0.0264028	NA	0.0340106
on.gene.LG18.489	NA	0.00100575	NA	NA	0.000238218	0.0291288	NA	0.0337848	0.000537016	0.000113869	0.0145894	NA	0.0204588	NA	NA
on.gene.LG18.51	NA	0.0218088	0.000337924	NA	0.000149903	NA	0.00295574	NA	NA	0.00141701	NA	0.000989595	0.0122589	NA	0.0232798
on.gene.LG19.171	NA	0.0386574	NA	NA	0.00547217	0.00137282	NA	0.00408493	0.0379627	0.00098551	0.000154447	NA	0.00013912	NA	NA
on.gene.LG2.13	NA	0.00392251	NA	NA	0.014122	0.00234584	NA	0.0120699	0.00294007	0.00117161	0.0135458	NA	0.0128231	NA	NA
on.gene.LG2.624	NA	0.00172468	NA	NA	0.0477906	0.000438759	0.0239843	0.034411	NA	0.000193182	NA	NA	NA	0.0175177	0.000412129
on.gene.LG20.378	NA	0.00727296	NA	NA	0.0110032	NA	0.0111529	0.0440064	NA	NA	NA	0.00390344	0.00336125	0.044003	0.00396973
on.gene.LG22.27	NA	0.000489979	NA	NA	0.0152702	NA	0.0221529	0.00017641	NA	0.00644996	0.00890179	NA	NA	0.000359787	0.000451403
on.gene.LG23.158	NA	0.00303204	NA	NA	0.0393863	0.00153516	NA	0.00189121	0.0234111	0.0201304	0.0249446	NA	0.00394283	NA	NA
on.gene.LG23.2080001	NA	0.00123738	NA	NA	0.000302491	0.0111151	NA	0.000510006	0.0182183	0.00305462	0.00656124	NA	0.000246102	NA	NA
on.gene.LG23.455	NA	0.0477919	0.000476495	0.00224432	NA	NA	0.0278506	0.00825242	NA	0.000152172	0.00134431	NA	0.0144093	NA	NA
on.gene.LG23.990001	NA	0.0132756	NA	NA	0.00332878	0.00763258	NA	0.000798475	0.000328797	0.0161147	0.00205146	NA	0.0480458	NA	NA
on.gene.LG4.35	NA	0.0277581	NA	NA	0.00074254	0.0413264	NA	0.00165827	0.00551304	0.0157434	0.00184177	NA	0.0112638	NA	NA
on.gene.LG4.786	NA	0.0246881	NA	0.00191106	NA	NA	0.0251379	0.000291148	0.00373399	0.0326108	0.000634276	NA	0.0081082	NA	NA
on.gene.LG5.290	NA	0.0264271	NA	NA	0.00549414	NA	0.0105917	0.000853668	NA	NA	NA	0.000978458	0.00186811	0.0018688	0.0265227
on.gene.LG5.6220001	NA	0.00296793	NA	NA	0.00219985	0.0338395	0.000209237	0.0273097	NA	0.00224019	0.0287991	NA	NA	NA	0.000188196
on.gene.LG5.895	NA	0.000129471	NA	NA	0.00916336	0.0193089	NA	0.00017641	NA	0.000384938	0.000190175	NA	NA	0.00605832	0.00286838
on.gene.LG6.292	NA	0.00758058	0.00308341	0.00118719	NA	NA	0.000211025	0.0070156	NA	0.0182211	0.0130053	NA	0.00208228	NA	NA
on.gene.LG6.361	NA	0.00115926	NA	NA	0.000898906	0.00153516	NA	0.000533567	0.00134612	0.00175093	0.00139517	NA	0.00150117	NA	NA
on.gene.LG7.1025	NA	0.00718497	NA	NA	0.00226883	0.0274173	NA	0.00392204	0.0136596	0.0102806	0.0150954	NA	0.00727721	NA	NA
on.gene.LG7.1037	NA	0.000202491	NA	NA	0.000182721	0.0146613	NA	0.00340917	0.000468564	0.000571896	0.0187732	NA	0.00935483	NA	NA
on.gene.LG7.142	NA	0.00636973	NA	NA	0.00333789	NA	0.00117127	0.00692851	NA	NA	NA	0.0442844	0.0143257	0.00251155	0.00130837
on.gene.LG7.833	NA	0.0280908	NA	NA	0.00131237	NA	0.0161746	0.00361962	NA	NA	NA	0.0188815	0.0256445	0.0347637	0.0275361
on.gene.LG7.905	NA	0.00275731	NA	NA	0.00311398	0.00727608	NA	0.000202956	0.00715164	0.0276737	0.0119251	NA	0.0042649	NA	NA
on.gene.LG8-24.711	NA	0.000728872	NA	NA	0.0187078	NA	0.0457163	0.00553815	NA	NA	NA	0.0116257	0.0248939	0.0170015	0.00142286
on.gene.UNK10.17	NA	0.00164379	0.00791245	0.00175226	NA	NA	NA	0.00061392	NA	0.000351276	0.00458268	NA	NA	0.00165363	0.00902551
on.gene.UNK110.17	NA	0.00535744	0.00013583	0.000285393	NA	NA	NA	0.00148338	NA	NA	NA	0.0440964	0.0385318	0.0254294	0.0334056
on.gene.UNK111.17	NA	0.00757668	NA	NA	0.00049072	0.0151875	NA	0.00157752	0.0123473	0.00318438	0.00184613	NA	0.000933932	NA	NA
on.gene.UNK1398.1	NA	0.000207739	NA	NA	0.00362268	0.00572675	NA	0.000272759	0.00125614	0.000375449	0.000192702	NA	0.00152358	NA	NA
on.gene.UNK2.58	NA	0.00125563	NA	NA	0.00554071	NA	0.00980634	0.000391246	NA	NA	NA	0.00457576	0.0068002	0.000891248	0.00129254
on.gene.UNK28.7	NA	0.0165061	NA	NA	0.0184686	0.00197342	NA	0.00253098	0.0390021	0.00819433	0.00303836	NA	0.00102579	NA	NA
on.gene.UNK56.12	NA	0.00257149	NA	NA	0.0150245	NA	0.00346866	0.011644	NA	NA	NA	0.00685379	0.000983457	0.00278892	0.000227588
on.gene.LG1.548	NA	NA	0.00659675	0.0024682	0.0253116	NA	NA	NA	NA	0.00350668	0.00220471	0.0224634	NA	0.027386	0.0130722
on.gene.LG11.2950001	NA	NA	0.000536261	0.00274534	0.00506291	NA	NA	NA	0.00422207	NA	0.000660078	0.00108237	NA	0.000303122	0.00192593
on.gene.LG11.4250001	NA	NA	0.00963078	NA	NA	0.00170899	0.00727774	0.027765	0.0271402	NA	0.000211535	0.00675811	NA	NA	0.00011705
on.gene.LG12.295	NA	NA	0.04104	0.000438671	0.00069962	NA	0.0303418	NA	NA	0.0134074	0.000109732	0.000133463	0.0112616	NA	NA
on.gene.LG12.379	NA	NA	0.0271278	0.0283933	NA	0.0107593	NA	0.0371067	NA	NA	NA	0.0189132	0.00154679	0.00455636	0.00652318
on.gene.LG12.411	NA	NA	0.0037711	0.00333602	0.00033577	0.00798191	NA	NA	0.00512139	NA	NA	NA	0.000941287	0.0251952	0.0222355
on.gene.LG12.808	NA	NA	0.0313065	0.00485023	0.000245723	NA	NA	NA	0.001848	0.0324391	0.00783846	0.000273228	NA	NA	0.018579
on.gene.LG14.701	NA	NA	0.0039114	0.00869138	0.0108165	NA	0.00849841	NA	NA	0.000180215	0.00100722	0.00106536	0.000665225	NA	NA
on.gene.LG18.328	NA	NA	0.020815	NA	0.0480203	NA	NA	NA	0.0323819	0.00504691	0.0287753	0.0197233	NA	0.00974861	0.0358239
on.gene.LG2.437	NA	NA	0.00470809	0.000988472	0.000239497	NA	NA	NA	0.00485659	0.000537395	0.000194767	NA	NA	0.0365637	0.00997009
on.gene.LG20.3900001	NA	NA	0.0261999	0.00622283	0.000637986	NA	0.00881047	NA	NA	0.0262054	0.0101063	0.000975395	0.0104984	NA	NA
on.gene.LG22.563	NA	NA	0.0356028	0.0159425	0.00030316	NA	0.0063282	NA	NA	0.0274486	0.0195647	0.000201562	0.0049703	NA	NA
on.gene.LG7.978	NA	NA	0.000339967	0.00352531	0.0204888	NA	NA	NA	NA	0.000554249	0.00840408	0.0440964	NA	0.00111119	0.00984174
on.gene.UNK1.31	NA	NA	0.0173844	0.00422201	0.00219586	0.0191706	NA	NA	0.00290987	NA	NA	NA	0.0177523	0.0162891	0.00462678
on.gene.UNK127.9	NA	NA	0.0117879	0.00155795	NA	NA	NA	NA	0.018962	0.00794057	0.00162382	0.0143679	NA	0.0384003	0.00847375
on.gene.UNK38.19	NA	NA	0.00992844	0.0335378	0.000280436	NA	0.00449967	NA	NA	0.00404102	0.0263528	0.000125686	0.00226959	NA	NA
on.gene.UNK43.31	NA	NA	0.0230588	0.00692291	0.0395182	NA	NA	NA	0.00831701	0.040425	0.0208287	0.00345034	NA	NA	0.0393671
on.gene.LG6.734	NA	NA	NA	0.00645811	0.000411068	NA	0.000161525	0.00622552	NA	NA	0.0123337	0.000781553	0.000311019	0.00319179	NA
on.gene.UNK519.2	NA	NA	NA	0.0269379	0.000332579	NA	NA	NA	0.00446285	0.0127854	0.00310044	0.00160715	NA	0.0240874	0.00467153
on.gene.LG6.227	NA	NA	NA	NA	0.0294486	0.00127249	0.000753195	0.0157969	NA	0.000429574	0.0080526	NA	NA	0.000304016	0.00448932
on.gene.LG13.415	NA	NA	NA	NA	NA	0.0152113	0.0333547	NA	0.0404861	0.00824109	0.00397199	0.0173851	NA	0.0236359	0.00846018
on.gene.UNK127.4	NA	NA	NA	NA	NA	0.00133909	0.0238113	NA	0.0358015	0.000162994	0.00213895	0.00193852	NA	0.00602061	0.0288194
on.gene.UNK29.3	NA	NA	NA	NA	NA	0.000856299	0.00245898	NA	0.00231339	0.00471528	0.000270732	0.00062728	NA	0.0143967	0.00076026
on.gene.LG1.17	0.00598356	0.00583282	NA	0.0134106	NA	0.00399666	NA	NA	NA	0.0136876	NA	0.000691163	NA	NA	0.000127762
on.gene.LG1.220	0.00230598	0.000359612	NA	0.000430193	NA	0.00303555	NA	NA	0.0460692	0.009428	NA	0.00133384	NA	NA	NA
on.gene.LG1.259	0.0266972	NA	NA	0.0316348	0.0297123	NA	NA	0.020542	NA	NA	0.00439419	0.00289134	0.0261627	NA	NA
on.gene.LG1.300	0.0427479	NA	NA	0.0230209	NA	0.00976177	NA	NA	0.0231584	0.00416893	NA	NA	0.0361584	NA	0.00636001
on.gene.LG1.558	0.046397	NA	NA	NA	NA	0.0230246	NA	0.000920832	NA	NA	0.0156652	0.000174233	0.000924717	0.00438746	NA
on.gene.LG1.734	0.00908094	NA	NA	0.000137428	NA	0.0319824	0.0445294	0.000145347	0.0374694	NA	NA	0.0159821	NA	NA	NA
on.gene.LG10.113	0.00221615	NA	NA	0.00504103	0.00889048	0.00640307	NA	0.00279783	NA	0.00164182	NA	NA	NA	0.0383331	NA
on.gene.LG10.69	0.0263921	NA	NA	NA	0.0416391	NA	NA	0.00176484	0.00461007	NA	0.0120844	0.000620717	NA	NA	0.0360138
on.gene.LG10.91	0.00178832	0.00267073	0.000414169	NA	0.00550756	NA	NA	NA	0.0184041	NA	0.0313877	NA	NA	0.000108274	NA
on.gene.LG11.215	0.000809284	NA	NA	NA	NA	0.0398658	NA	0.0256881	NA	NA	0.000490864	0.0219409	0.00122728	0.00198005	NA
on.gene.LG11.232	0.0013065	0.0023416	NA	0.00620023	NA	NA	NA	NA	NA	0.0312199	NA	0.0462712	0.0146504	NA	0.000399824
on.gene.LG11.277	0.00193954	NA	NA	0.0228628	0.00793738	NA	NA	0.000198076	0.00903626	0.0162093	NA	NA	NA	NA	0.0224302
on.gene.LG11.410	0.00225669	NA	NA	0.000731975	0.0244535	NA	NA	0.0452505	NA	NA	0.000476637	0.0159686	NA	NA	0.00957563
on.gene.LG11.461	0.00105832	NA	NA	0.00091769	0.0174132	NA	NA	0.016182	0.000326768	NA	0.04274	NA	0.0201766	NA	NA
on.gene.LG11.515	0.0226645	0.000543566	NA	NA	NA	NA	0.00134435	NA	NA	0.00491252	NA	0.000633154	0.00773787	NA	0.00368285
on.gene.LG11.683	0.00907507	NA	NA	0.0430581	0.00504164	NA	NA	0.000308538	0.0257663	NA	0.0376493	0.0037147	NA	NA	NA
on.gene.LG11.770	0.0234318	NA	NA	NA	0.00118746	NA	NA	0.0055104	0.0471981	0.0302724	NA	NA	0.00812586	NA	0.00517507
on.gene.LG11.885	0.000210398	NA	NA	0.00100538	0.000347751	NA	NA	0.00176287	0.00035046	NA	0.0404897	NA	NA	NA	0.00155835
on.gene.LG12.300001	0.00476748	NA	0.0213332	NA	NA	0.0039186	NA	0.000174001	NA	NA	0.000773181	0.000175686	0.0130912	NA	NA
on.gene.LG12.586	0.00176176	NA	NA	0.000105046	0.000283583	0.00697596	0.000184741	0.00401637	NA	0.000180215	NA	NA	NA	NA	NA
on.gene.LG12.73	0.0377568	NA	NA	NA	NA	NA	0.0130591	0.0304723	0.00115953	NA	0.0123335	0.009047	NA	NA	0.00152498
on.gene.LG12.764	0.0278909	0.0251109	0.0314228	NA	0.016931	0.0102553	NA	NA	NA	NA	0.010695	NA	0.0392391	NA	NA
on.gene.LG12.92	0.0189305	NA	NA	0.0430581	NA	0.00191881	0.000384498	NA	0.00236465	0.000265088	NA	0.00827397	NA	NA	NA
on.gene.LG12.925	0.0347613	NA	0.0356052	NA	NA	0.00103575	0.0470324	NA	NA	NA	0.00143474	0.00509387	NA	NA	0.0420869
on.gene.LG12.990	0.0362946	NA	NA	0.0274011	0.000371611	0.00239112	NA	0.000424921	NA	0.00219988	NA	NA	NA	NA	0.00106295
on.gene.LG13.201	0.0308378	0.00204609	0.0300543	NA	0.000862032	NA	0.00225772	NA	NA	NA	NA	0.0466354	NA	NA	0.00254107
on.gene.LG13.477	0.0233296	NA	0.000486001	NA	NA	NA	0.000342494	0.0128743	0.0126987	NA	NA	0.000634963	NA	NA	0.0273971
on.gene.LG13.682	0.0265822	NA	NA	NA	0.0110032	0.0275503	NA	0.0398297	NA	0.00409646	NA	NA	0.000711624	NA	0.00510226
on.gene.LG13.756	0.023852	0.00145285	NA	0.00769148	NA	NA	0.0238836	NA	0.00336417	NA	0.0170247	NA	0.0355151	NA	NA
on.gene.LG13.838	0.000858967	NA	NA	0.0387504	0.0338377	0.047389	NA	NA	0.000659043	0.000482869	NA	NA	NA	0.0421639	NA
on.gene.LG14.246	0.0473334	NA	NA	NA	0.0460482	NA	NA	0.0248017	0.0274098	NA	0.00838463	0.00394148	NA	NA	0.0391909
on.gene.LG14.257	0.0277092	0.0125465	0.000144722	NA	NA	0.000127905	0.000213875	NA	NA	NA	0.0301437	NA	NA	NA	0.0330346
on.gene.LG14.405	0.00543225	NA	NA	0.00186092	0.00270042	NA	NA	0.00654681	NA	NA	0.00255121	0.00322067	NA	NA	0.0413845
on.gene.LG14.420	0.00219869	0.000156465	NA	0.00522191	NA	0.0465754	NA	NA	NA	0.0163741	NA	0.00132074	NA	NA	0.0156918
on.gene.LG14.503	0.041911	NA	NA	0.000509091	NA	NA	0.000593736	0.00208293	NA	NA	NA	0.00255072	0.0443668	0.0432251	NA
on.gene.LG14.578	0.00546552	NA	NA	NA	0.0349051	0.0188504	NA	0.000765407	0.0202624	NA	NA	NA	0.0368074	NA	0.0458131
on.gene.LG14.846	0.0229948	0.0419555	NA	NA	0.0170888	0.00556174	NA	NA	0.0218791	NA	0.000847593	NA	0.00522693	NA	NA
on.gene.LG15.581	0.00960065	0.00157925	0.0199808	NA	0.0139043	0.000188619	0.0270775	NA	NA	NA	NA	NA	NA	NA	0.00816243
on.gene.LG16-21.111	0.00951365	0.00624806	NA	NA	NA	NA	0.000722034	NA	0.0234039	NA	0.00516856	NA	0.0213287	0.0396822	NA
on.gene.LG16-21.214	0.0459335	0.00465784	NA	0.0470046	NA	NA	NA	NA	NA	0.0459523	NA	0.00320591	0.000135999	NA	0.000148606
on.gene.LG16-21.350	0.0244489	NA	0.0267058	NA	NA	NA	0.000258679	0.000119211	0.0359198	NA	0.000672343	NA	0.0341778	NA	NA
on.gene.LG16-21.368	0.000420486	0.0388798	NA	NA	0.00186504	0.000196801	0.000307728	NA	NA	0.0185882	NA	NA	NA	0.0321983	NA
on.gene.LG16-21.379	0.000123443	NA	NA	0.0112734	NA	NA	NA	0.000705996	NA	NA	0.00160179	0.00939682	0.0309652	0.00455285	NA
on.gene.LG16-21.517	0.0151711	NA	NA	0.0360945	0.029761	NA	0.0232498	0.00869001	NA	NA	NA	NA	0.0354304	0.00682952	NA
on.gene.LG16-21.545	0.0430749	NA	NA	0.007727	0.0133134	NA	0.039973	NA	NA	NA	0.00509128	0.00794553	0.0222044	NA	NA
on.gene.LG16-21.761	0.0402632	NA	NA	NA	NA	0.0467133	0.0423751	0.00121503	0.00658698	NA	0.0473375	0.00224392	NA	NA	NA
on.gene.LG17.134	0.0213105	0.000662002	NA	0.00346858	NA	NA	0.0399492	NA	0.00760509	NA	0.00980651	NA	0.00238444	NA	NA
on.gene.LG17.237	0.000704661	0.0130867	NA	0.000166211	NA	0.000875268	0.0293811	NA	NA	0.0021122	NA	0.0337129	NA	NA	NA
on.gene.LG17.243	0.0120195	NA	0.0135151	NA	NA	0.0158758	NA	0.000297346	0.0125948	NA	0.0160307	0.000433729	NA	NA	NA
on.gene.LG17.396	0.00611388	0.000150451	NA	0.00710502	NA	NA	0.0176261	NA	0.000207777	NA	0.0329888	NA	NA	0.0121997	NA
on.gene.LG17.49	0.022228	0.00022374	NA	0.00648008	NA	0.00932323	NA	NA	NA	0.00620899	NA	0.000117618	NA	NA	0.0469454
on.gene.LG17.69	0.00159054	NA	NA	0.0025882	NA	0.000677518	NA	NA	NA	0.000187818	NA	0.0133445	0.0136691	NA	0.0374323
on.gene.LG17.699	0.00818513	0.000108607	0.0299003	NA	0.000319263	NA	0.0256613	NA	NA	NA	NA	0.0160006	NA	NA	0.00677239
on.gene.LG17.764	0.0026336	0.0452451	0.000444428	NA	0.00809634	0.00263407	NA	NA	0.000287396	NA	0.0122694	NA	NA	NA	NA
on.gene.LG18.108	0.00731984	NA	NA	NA	0.015962	NA	NA	0.000476089	0.00369874	NA	0.0118938	0.00084032	NA	NA	0.0238356
on.gene.LG18.179	0.00956519	NA	NA	0.00812493	0.000454406	NA	NA	0.000380163	0.00114157	NA	0.0012792	NA	NA	NA	0.0134436
on.gene.LG18.224	0.019431	0.000736427	NA	NA	NA	0.0381981	NA	NA	NA	0.00769095	NA	0.000103599	0.000172985	NA	0.000588915
on.gene.LG18.23	0.00188725	NA	NA	0.00035266	0.000237207	0.0405071	0.0097875	0.00111094	NA	NA	NA	NA	NA	0.031212	NA
on.gene.LG18.245	0.0377111	0.000409211	NA	0.000121359	NA	0.00275093	NA	NA	NA	NA	NA	0.00450776	0.0302417	NA	0.00276489
on.gene.LG18.249	0.0222934	NA	NA	NA	NA	0.00847663	0.0353021	NA	0.0403525	0.000180215	NA	0.00843383	NA	0.00172643	NA
on.gene.LG18.392	0.046715	NA	NA	0.0021804	0.00163791	NA	NA	0.0425005	0.00010535	NA	NA	NA	0.014983	NA	0.00015213
on.gene.LG18.402	0.0490806	NA	NA	0.00511283	0.00015454	NA	NA	0.00283605	0.0243948	NA	0.0397909	0.00219208	NA	NA	NA
on.gene.LG18.44	0.00140616	NA	NA	NA	NA	0.000167284	NA	0.00667799	NA	NA	0.0024243	0.0127784	0.0267368	0.0194912	NA
on.gene.LG18.444	0.0247739	NA	NA	0.029558	NA	NA	NA	0.0416908	0.0127509	NA	0.000105965	0.00012894	NA	NA	0.00574115
on.gene.LG18.523	0.0137904	NA	NA	0.0493764	NA	0.0448662	NA	NA	NA	0.00805299	NA	0.0449307	0.00408643	NA	0.00585236
on.gene.LG18.598	0.0293863	NA	NA	NA	0.000985337	0.0459772	NA	NA	0.0120763	NA	0.0270619	NA	0.00757295	0.0304896	NA
on.gene.LG18.607	0.0158012	0.0062113	NA	NA	NA	0.00045729	NA	NA	0.000116126	0.00637727	NA	0.00279693	NA	0.000341383	NA
on.gene.LG18.608	0.047688	NA	NA	NA	0.0217659	0.0418928	0.0342091	0.0010211	NA	0.00231957	NA	NA	NA	0.00232326	NA
on.gene.LG18.775	0.00877925	0.00033316	NA	0.00175226	NA	0.0466315	NA	NA	NA	0.00870066	NA	0.0256224	NA	NA	0.000244733
on.gene.LG18.813	0.0165175	NA	NA	0.00061519	0.0208618	0.000505115	0.00179472	NA	NA	0.0095108	NA	NA	NA	0.0315404	NA
on.gene.LG18.816	0.000285033	0.0011015	NA	0.000754179	NA	0.000241454	NA	NA	NA	NA	NA	0.000141797	0.00648718	NA	0.0148544
on.gene.LG19.115	0.000633789	0.000116909	NA	0.00428552	NA	NA	NA	NA	0.0121365	NA	0.000211972	NA	0.0201861	0.0445409	NA
on.gene.LG19.273	0.00116378	NA	NA	0.000764762	0.00465842	NA	0.0442504	0.00559453	NA	NA	0.00405004	0.0208283	NA	NA	NA
on.gene.LG19.289	0.0333766	NA	NA	NA	0.0353978	NA	NA	0.013614	0.0254018	NA	0.0334918	0.0151491	NA	NA	0.0407865
on.gene.LG19.441	0.00201159	0.0140597	NA	NA	NA	0.0387519	NA	NA	NA	0.00014194	NA	0.00146732	0.00584553	NA	0.0257541
on.gene.LG19.6	0.00557616	NA	NA	0.000139217	NA	NA	NA	0.00201424	0.00369668	NA	0.00220289	0.000733233	NA	NA	0.00639979
on.gene.LG19.697	0.0118076	0.00245156	0.00379123	NA	0.000279744	NA	0.015487	NA	NA	NA	NA	0.0265126	NA	NA	0.0345814
on.gene.LG2.391	0.0351077	0.0429608	0.0151962	NA	0.00996646	NA	NA	NA	NA	0.00419149	NA	0.00371062	0.0260446	NA	NA
on.gene.LG2.592	0.0105744	0.0187443	NA	0.0350781	NA	NA	NA	NA	NA	0.0135397	NA	0.0223148	0.0315403	NA	0.0199964
on.gene.LG2.599	0.00179612	NA	NA	0.00142323	0.000770793	NA	NA	0.000750005	0.0417876	NA	NA	NA	0.0472193	NA	0.0427441
on.gene.LG20.161	0.00337489	0.000847246	NA	0.00214581	NA	0.0280027	NA	NA	NA	0.0177713	NA	0.00695441	NA	NA	0.000120298
on.gene.LG20.2900001	0.025949	NA	NA	0.00770386	0.0001666	NA	NA	0.000702249	0.000402371	NA	0.000200801	NA	NA	NA	0.0118429
on.gene.LG20.3580001	0.00277656	NA	NA	0.0328456	0.00529877	NA	0.0285224	0.000177165	NA	0.0222571	NA	NA	NA	0.00171621	NA
on.gene.LG20.440	0.000190251	NA	NA	NA	0.000306947	0.00119043	0.0481407	0.0218649	NA	0.0393574	NA	NA	NA	NA	0.0160587
on.gene.LG20.4910001	0.00230081	NA	NA	0.00196585	0.000545627	NA	NA	0.00050279	0.0360897	NA	0.00331888	0.000823433	NA	NA	NA
on.gene.LG20.579	0.0123792	0.0400562	0.00121541	NA	0.00296368	0.00381796	0.011988	NA	NA	NA	0.0329029	NA	NA	NA	NA
on.gene.LG20.621	0.0484963	NA	NA	NA	0.00305422	0.0143444	NA	0.0390021	NA	0.000407715	NA	NA	0.000207912	NA	0.0246493
on.gene.LG20.624	0.00539119	0.0390029	NA	0.0308573	NA	NA	0.00101679	NA	0.00069381	NA	0.000746715	NA	0.021154	NA	NA
on.gene.LG20.661	0.0107015	0.0197985	NA	0.0184313	NA	NA	0.0350246	NA	0.0260334	NA	0.0399493	NA	NA	0.0128855	NA
on.gene.LG22.110	0.0156317	NA	NA	0.00698184	0.00773174	NA	NA	0.0154098	NA	NA	0.00323246	0.00292774	0.0277321	NA	NA
on.gene.LG22.161	0.0269152	0.000117896	NA	NA	0.00126133	NA	0.0171935	NA	NA	NA	NA	0.00398681	0.0066175	NA	0.000149013
on.gene.LG22.198	0.0230944	0.0104051	0.0116005	NA	0.045783	NA	NA	NA	0.0434379	0.0397387	NA	NA	NA	0.0143577	NA
on.gene.LG22.336	0.000136865	0.00584889	NA	NA	0.0342719	0.0115886	0.0382999	NA	NA	NA	0.0413738	NA	NA	NA	0.0407326
on.gene.LG22.374	0.031381	NA	NA	0.000853175	0.00371581	0.000286095	NA	NA	NA	0.0123328	NA	NA	0.0135257	NA	0.02719
on.gene.LG22.390	0.0011739	NA	0.000539067	NA	NA	0.00189344	0.0189856	NA	0.000307871	NA	0.00427576	NA	NA	NA	0.0271997
on.gene.LG22.70	0.0206537	0.00524898	0.0246487	NA	0.00314129	NA	NA	NA	0.0101177	0.000533787	NA	NA	NA	0.0463747	NA
on.gene.LG22.8	0.00569383	NA	0.0161587	NA	NA	NA	0.000811284	0.00230564	NA	0.000780798	NA	NA	0.0258429	NA	0.000248545
on.gene.LG23.214	0.000369746	NA	NA	0.000120532	0.00300267	NA	NA	0.00641943	NA	NA	0.00214077	0.0335622	NA	NA	0.00865705
on.gene.LG23.343	0.00566772	0.0120752	NA	0.00279468	NA	0.00260674	NA	NA	NA	0.00149567	NA	NA	0.00223576	NA	0.00358179
on.gene.LG23.417	0.00231089	NA	NA	0.00976943	0.00277359	0.0455785	NA	0.000296361	0.00208485	NA	NA	NA	NA	NA	0.00677239
on.gene.LG23.46	0.00177873	NA	NA	0.0266321	NA	NA	NA	0.00593709	0.0222712	NA	0.00327972	0.0122979	NA	NA	0.00490267
on.gene.LG23.473	0.0128661	NA	0.000662786	NA	NA	0.000107942	NA	0.000137035	NA	NA	0.0237497	NA	0.00735822	0.029044	NA
on.gene.LG23.482	0.0124731	NA	NA	NA	NA	NA	0.0485593	0.0159391	0.00288326	0.00478702	NA	NA	0.000626302	NA	0.00157886
on.gene.LG23.568	0.00676014	NA	NA	0.00715507	0.00129243	NA	NA	0.000818281	0.0100703	NA	0.000232778	NA	NA	NA	0.0293513
on.gene.LG23.615	0.0313254	NA	NA	0.0195679	0.00230925	NA	NA	0.00343542	0.0248893	NA	0.0196918	0.00181149	NA	NA	NA
on.gene.LG3.145	0.0209941	NA	NA	NA	0.00822262	NA	0.000100722	NA	NA	NA	0.0134343	0.0360341	0.000482042	0.00232409	NA
on.gene.LG3.1710001	0.0015111	NA	NA	0.00629951	NA	NA	NA	0.0284499	NA	NA	0.000185256	0.00607998	0.00432935	0.0238393	NA
on.gene.LG3.265	0.000128856	0.000971877	0.0445142	NA	0.000696558	NA	NA	NA	0.00066032	0.000201829	NA	NA	NA	0.0323827	NA
on.gene.LG4.141	0.0256665	0.000570964	NA	0.000213869	NA	0.0142168	NA	NA	NA	NA	NA	0.000356668	0.00917027	NA	0.000441465
on.gene.LG4.151	0.0363236	NA	NA	0.00143217	0.0246043	NA	NA	NA	0.0181377	NA	0.000768787	0.0173741	NA	NA	0.000820833
on.gene.LG4.240	0.0344132	0.000135699	NA	0.000666776	NA	NA	NA	NA	0.0429815	NA	0.000617403	NA	0.0166207	0.00327054	NA
on.gene.LG4.319	0.0186963	NA	NA	0.0101439	0.0204291	NA	NA	0.032327	0.00731749	NA	NA	NA	0.0165763	NA	0.00314614
on.gene.LG4.338	0.0160552	0.000587285	NA	0.00500211	NA	0.0296965	NA	NA	0.0407181	0.000599982	NA	0.00248826	NA	NA	NA
on.gene.LG4.479	0.0131262	NA	NA	0.000244195	NA	NA	NA	0.00524514	0.00690635	NA	0.0348673	0.0207849	NA	NA	0.0115983
on.gene.LG4.4810002	0.0283461	NA	NA	0.0110097	NA	NA	0.00310734	NA	0.0177261	0.0182371	NA	0.000995749	NA	0.00745852	NA
on.gene.LG4.593	0.0119295	NA	NA	0.0361018	NA	NA	0.00601498	0.0495525	NA	NA	0.0436778	NA	0.00521532	0.0011642	NA
on.gene.LG4.639	0.00373228	NA	NA	0.00492311	0.000489591	NA	NA	0.00035104	NA	NA	0.00073439	0.00248791	NA	NA	0.0485348
on.gene.LG4.6390001	0.0399253	NA	NA	0.00227518	0.000796874	NA	NA	NA	0.000246212	NA	0.000481416	0.00247814	NA	NA	0.00774526
on.gene.LG4.863	0.000659249	NA	NA	0.00191531	0.0114583	NA	NA	0.00340602	0.00434652	NA	0.0226191	NA	NA	NA	0.000580445
on.gene.LG4.907	0.000556055	0.0395181	NA	0.031806	NA	NA	NA	NA	0.00512862	0.000854501	NA	0.00605069	NA	0.0102715	NA
on.gene.LG5.112	0.000987365	NA	NA	0.0133724	NA	0.000151209	NA	0.0424723	0.0407467	NA	NA	0.00337962	NA	NA	0.000649065
on.gene.LG5.163	0.000800108	NA	0.000428501	NA	NA	NA	0.0063282	NA	0.0234111	0.00276861	NA	NA	0.0273229	NA	0.00737896
on.gene.LG5.517	0.0459335	NA	NA	NA	0.028516	NA	NA	0.0166663	NA	NA	0.0032576	0.000609109	0.00197566	0.0389879	NA
on.gene.LG5.586	0.000413933	NA	NA	0.000460675	0.045054	NA	NA	0.0354594	NA	NA	0.000154447	0.0238461	NA	NA	0.000483603
on.gene.LG5.644	0.00512786	0.0496767	0.0425823	NA	NA	NA	NA	NA	0.0447133	0.000273495	NA	0.00511804	NA	0.00476677	NA
on.gene.LG5.652	0.0312396	NA	0.045817	NA	0.000200448	NA	NA	NA	0.0204894	0.0359994	NA	0.00022939	NA	NA	0.000689998
on.gene.LG5.711	0.0217107	0.000164253	NA	NA	0.00418948	NA	NA	NA	NA	0.000827067	NA	0.00940189	0.0018517	NA	0.0130636
on.gene.LG5.789	0.0327715	0.0239244	0.000455072	NA	0.000129969	0.000956163	NA	NA	0.00866556	NA	NA	NA	NA	0.0164807	NA
on.gene.LG5.86	0.000121911	NA	0.00115455	NA	NA	NA	0.0277554	0.000516633	0.0233781	0.00276861	NA	NA	NA	NA	0.00459889
on.gene.LG6.1037	0.000196578	NA	NA	0.000450426	0.00889493	NA	0.0288551	0.00376832	NA	NA	0.00555629	NA	NA	0.0137304	NA
on.gene.LG6.204	0.0235427	NA	NA	0.0277843	0.000429341	0.000249036	0.0184584	0.000184513	NA	NA	NA	NA	NA	0.0116368	NA
on.gene.LG6.297	0.00509601	NA	NA	0.000199022	0.016902	0.00130975	NA	NA	0.0140091	NA	NA	NA	0.00221806	NA	0.000128844
on.gene.LG6.322	0.0492722	NA	0.0465672	NA	NA	0.00665982	0.00349809	0.000143081	0.0115483	NA	NA	0.00157129	NA	NA	NA
on.gene.LG6.3860001	0.000179261	0.000402928	NA	NA	NA	0.00194465	NA	NA	NA	0.0100249	NA	0.0165224	0.0386261	NA	0.000982626
on.gene.LG6.387	0.00364441	NA	0.00454191	NA	NA	NA	0.0455756	0.00523063	NA	0.00232407	NA	NA	0.0309313	NA	0.0309355
on.gene.LG6.522	0.000303124	0.00270891	NA	NA	NA	0.000507456	NA	NA	NA	0.00417926	NA	0.0245156	0.0181987	NA	0.00142308
on.gene.LG6.551	0.00036531	0.00159189	NA	NA	NA	0.030436	NA	NA	0.00708935	0.0118051	NA	0.0357137	NA	0.00252854	NA
on.gene.LG6.659	0.00412542	NA	NA	0.0429581	NA	NA	NA	0.0112385	0.0337212	NA	0.00983998	0.0328819	NA	NA	0.00924465
on.gene.LG6.829	0.0203776	0.000574032	NA	0.000268286	NA	NA	NA	NA	NA	0.00214042	NA	0.0171327	0.0027303	NA	0.0293602
on.gene.LG6.9750001	0.00128191	0.00679853	NA	0.0456666	NA	NA	NA	NA	NA	0.00114922	NA	0.00506684	0.00477007	NA	0.00406958
on.gene.LG7.1012	0.000155751	0.000326498	0.00546972	NA	0.00608534	NA	NA	NA	0.00799473	NA	0.0105374	NA	NA	0.00527693	NA
on.gene.LG7.1015	0.00377842	NA	NA	0.0025271	0.00737694	NA	NA	0.00892791	NA	NA	0.000453244	0.00123287	0.0388089	NA	NA
on.gene.LG7.1273	0.0114016	NA	NA	0.000587874	0.00257962	NA	NA	0.0362581	NA	NA	0.00704716	0.0258642	NA	NA	0.0388898
on.gene.LG7.130	0.0171466	NA	0.0276907	NA	NA	NA	0.003514	0.000124345	NA	0.0034431	NA	NA	0.00037773	NA	0.00212571
on.gene.LG7.1349	0.00242271	NA	NA	0.000160735	NA	0.0238584	NA	NA	NA	0.00262325	NA	0.0487955	0.00311244	NA	0.00222006
on.gene.LG7.153	0.0497066	NA	NA	0.000540452	NA	0.0130052	NA	0.0300843	NA	NA	NA	0.000166657	0.00551657	NA	0.000215063
on.gene.LG7.331	0.00123573	NA	NA	NA	0.0347661	NA	NA	0.000328552	NA	NA	0.000737397	0.000180198	0.00925732	0.0140317	NA
on.gene.LG7.350	0.00369103	NA	0.0447734	NA	NA	0.0076976	NA	0.034162	0.0166561	NA	0.0136524	NA	NA	NA	0.00115074
on.gene.LG7.37	0.00048374	NA	NA	NA	NA	NA	0.0295746	0.000934723	0.0379146	NA	0.00181668	0.00424411	NA	NA	0.0128356
on.gene.LG7.524	0.000282355	0.0159783	0.0395886	NA	NA	NA	NA	NA	NA	0.000607646	NA	0.0339593	0.0219935	NA	0.00798343
on.gene.LG7.618	0.00767724	NA	0.00265194	NA	NA	0.03476	NA	0.0283727	NA	NA	0.0143649	NA	0.0165763	0.00612371	NA
on.gene.LG7.720	0.00788728	NA	NA	0.0308487	0.0271229	NA	0.0020968	NA	NA	NA	NA	0.00178223	0.0130287	0.000166412	NA
on.gene.LG7.771	0.0107902	0.0220653	NA	0.0184313	NA	NA	0.00266723	NA	NA	NA	0.00989997	NA	0.000863185	0.000907854	NA
on.gene.LG8-24.461	0.00160848	NA	NA	0.00178184	0.00626535	NA	0.000398298	0.0045407	NA	NA	NA	NA	0.0369541	0.000272329	NA
on.gene.LG8-24.642	0.000242795	NA	NA	0.000675358	0.0260509	NA	NA	NA	0.000977099	NA	0.00475284	0.00107439	NA	NA	0.0225258
on.gene.LG9.130	0.0163415	NA	NA	0.0026311	0.00766831	0.0251453	0.00939595	0.0400127	NA	NA	NA	NA	NA	0.0431736	NA
on.gene.LG9.1460002	0.0471884	NA	NA	NA	NA	NA	0.0205238	0.021052	0.00148875	NA	0.0386075	0.0190088	NA	NA	0.00406352
on.gene.LG9.33	0.00484419	NA	NA	0.000988472	NA	NA	0.0176355	0.0354813	NA	NA	0.0032187	0.012821	0.0352577	NA	NA
on.gene.LG9.3770001	0.00115801	0.000315611	NA	0.0130125	NA	NA	NA	NA	0.00267708	NA	0.00348123	NA	0.0246088	0.00956178	NA
on.gene.UNK1.101	0.021293	NA	0.000606654	NA	NA	NA	0.00314339	0.00991943	0.00396162	NA	NA	NA	0.000790899	NA	0.00710634
on.gene.UNK1.75	0.00539924	0.00438203	0.0337418	NA	0.0165478	0.0456645	NA	NA	NA	NA	0.00957901	NA	NA	NA	0.020244
on.gene.UNK111.20	0.032633	0.0389336	0.00584199	NA	NA	0.00022088	NA	NA	0.00375977	NA	0.00326939	NA	0.0464313	NA	NA
on.gene.UNK12.31	0.0213083	NA	NA	0.00107317	0.0145382	NA	NA	NA	0.00805935	NA	0.00104551	0.0129477	NA	NA	0.00045971
on.gene.UNK131.11	0.0373474	0.00757374	0.000168731	NA	0.000117387	0.00025811	NA	NA	0.0380699	NA	0.0179707	NA	NA	NA	NA
on.gene.UNK14.71	0.000170124	0.0177218	NA	0.000120947	NA	0.00755323	0.0305824	NA	NA	0.00692742	NA	NA	NA	0.0339018	NA
on.gene.UNK144.9	0.00844482	NA	NA	NA	0.00776104	NA	NA	0.000116642	0.00121232	NA	0.0392825	0.000847943	NA	NA	0.0324617
on.gene.UNK1501.1	0.00711811	NA	NA	0.00719972	0.0414098	0.000556907	NA	0.0349966	NA	0.000324176	NA	NA	0.0473478	NA	NA
on.gene.UNK151.2	0.0318522	NA	0.000182136	NA	NA	0.00782001	NA	NA	NA	NA	0.000232064	0.00235225	0.000111514	0.0221099	NA
on.gene.UNK155.5	0.0109567	NA	NA	0.000425249	0.00656337	NA	NA	0.000101708	0.0189568	NA	0.0315943	NA	NA	NA	0.000188291
on.gene.UNK166.14	0.000289748	0.000700967	NA	NA	0.0054933	0.00235829	NA	NA	0.0128507	NA	0.00495478	NA	NA	0.00812103	NA
on.gene.UNK17.10	0.00180491	NA	NA	0.0419472	0.00512675	NA	NA	NA	NA	NA	0.00400036	0.0309555	0.00053249	0.00442049	NA
on.gene.UNK1721.1	0.000901315	NA	NA	0.00499366	0.00139492	0.00310624	NA	0.000152771	NA	0.00028082	NA	NA	NA	0.017478	NA
on.gene.UNK18.7	0.00104047	NA	0.000476549	NA	NA	NA	0.00197967	0.0041519	0.0183031	0.020577	NA	NA	NA	NA	0.00343865
on.gene.UNK1894.1	0.00177418	0.0140843	0.000242562	NA	0.00175354	NA	0.000667674	NA	NA	NA	0.000152817	NA	NA	NA	0.0036998
on.gene.UNK19.33	0.00617619	0.0475404	NA	0.000627291	NA	0.000280337	NA	NA	NA	0.00212935	NA	0.0191254	0.0392057	NA	NA
on.gene.UNK196.60001	0.00663003	0.00547557	0.0151891	NA	0.000867212	NA	NA	NA	0.0149406	NA	0.0449921	NA	0.00147139	NA	NA
on.gene.UNK2.15	0.00203864	0.000139898	NA	0.00208083	NA	0.0170223	NA	NA	0.0308224	0.0114867	NA	0.000879376	NA	NA	NA
on.gene.UNK2.51	0.0184883	NA	NA	0.0200183	NA	0.000285648	0.0136626	NA	NA	0.000125411	NA	0.0073763	NA	0.00992023	NA
on.gene.UNK213.6	0.0399633	0.0181376	NA	0.00195877	NA	0.0257384	0.00108687	NA	0.0078117	NA	NA	NA	NA	0.0255667	NA
on.gene.UNK2304.1	0.00230923	NA	NA	0.00708078	0.00371926	NA	NA	0.000846722	0.0473333	NA	0.0170932	0.00880297	NA	NA	NA
on.gene.UNK25.25	0.000907489	NA	NA	0.00477638	NA	0.00297736	0.0396004	NA	0.000205793	0.000270388	NA	NA	NA	0.00822128	NA
on.gene.UNK29.2	0.000925492	NA	0.00118955	NA	NA	0.0312973	NA	NA	NA	NA	0.0267231	0.000418971	0.014636	0.000417989	NA
on.gene.UNK30.29	0.00578487	0.00417523	NA	0.000403847	NA	0.0251453	0.000276516	NA	0.00212968	NA	NA	NA	NA	0.00410777	NA
on.gene.UNK313.5	0.0157307	0.0133403	NA	NA	NA	NA	0.0135901	NA	0.00137962	NA	0.00306152	NA	0.00028576	0.00212309	NA
on.gene.UNK41.46	0.0315402	NA	NA	0.000857163	0.00123401	NA	NA	0.0453013	0.00188134	NA	0.0326574	NA	NA	NA	0.00108369
on.gene.UNK48.5	0.0105065	NA	0.00907597	NA	NA	NA	0.00222753	0.00970924	0.00324557	NA	NA	0.00516808	NA	NA	0.00270613
on.gene.UNK485.4	0.0121501	NA	NA	0.0133786	0.000231087	0.0238461	0.00060897	0.029523	NA	0.00243986	NA	NA	NA	NA	NA
on.gene.UNK495.1	0.0144101	0.0151223	NA	0.0155004	NA	NA	NA	NA	NA	0.00129221	NA	0.000942653	0.0029152	NA	0.0215265
on.gene.UNK5.35	0.0226311	NA	NA	0.00601706	0.00452814	0.0308674	NA	0.0165562	0.0228872	NA	NA	NA	NA	NA	0.022442
on.gene.UNK5.58	0.0038983	NA	NA	0.00502324	NA	0.0167671	NA	NA	NA	0.00901877	NA	0.000110135	0.0296403	NA	0.0110715
on.gene.UNK54.23	0.000619342	NA	NA	0.0440081	0.00495839	NA	NA	NA	0.000170041	NA	0.0192677	0.00122893	NA	NA	0.00370693
on.gene.UNK554.1	0.000126348	0.00610863	0.000989081	NA	0.0179015	NA	NA	NA	0.00966164	NA	NA	0.00165505	NA	0.000275602	NA
on.gene.UNK58.8	0.000941696	0.020454	NA	0.000842836	NA	0.0011946	NA	NA	0.00216853	0.000784948	NA	0.0199665	NA	NA	NA
on.gene.UNK643.1	0.00895657	NA	NA	0.00990235	NA	NA	0.0246423	NA	NA	NA	0.0222856	0.00554707	0.00143338	0.0401156	NA
on.gene.UNK67.15	0.0385452	0.0149671	0.0219356	NA	0.00834922	NA	0.0303655	NA	NA	NA	0.000287542	NA	NA	NA	0.022172
on.gene.UNK748.2	0.0182605	0.0187057	NA	NA	NA	0.0182468	NA	NA	NA	0.000360011	NA	0.000265304	0.000671126	NA	0.0224302
on.gene.UNK766.1	0.0369094	0.0219468	0.0372088	NA	0.0126576	NA	0.00527197	NA	NA	0.000119692	NA	NA	NA	NA	0.00538589
on.gene.UNK86.15	0.0108229	NA	NA	NA	NA	0.00449037	0.000153047	NA	0.0408141	0.0339812	NA	0.000252891	NA	NA	0.000183907
on.gene.UNK89.22	0.0030343	NA	0.000658122	NA	NA	0.000688465	NA	0.000779453	NA	NA	0.00122252	0.000289031	0.0248364	NA	NA
on.gene.LG1.12	NA	0.00396537	NA	NA	0.000123834	NA	NA	0.0112395	0.0202701	0.00393034	0.0232662	NA	0.00472069	NA	NA
on.gene.LG1.460	NA	0.00374724	NA	NA	0.020531	0.000397232	NA	0.0241935	0.0355083	0.000362099	NA	NA	0.000626302	NA	NA
on.gene.LG1.522	NA	0.00130159	NA	0.0224052	NA	NA	NA	0.0238734	NA	0.01075	0.000334369	NA	NA	0.0415557	0.00148284
on.gene.LG1.603	NA	0.000154272	0.0160316	0.00150444	NA	NA	0.0231408	NA	NA	0.00279762	0.000327704	NA	0.00567017	NA	NA
on.gene.LG1.678	NA	0.00016154	NA	NA	0.000825115	0.0186579	NA	0.0246165	0.00235236	0.000322524	NA	NA	0.0102438	NA	NA
on.gene.LG10.27	NA	0.00105387	NA	NA	0.00134882	NA	0.035471	0.0233897	NA	NA	NA	0.000414267	0.0142041	NA	0.015316
on.gene.LG10.296	NA	0.000207328	NA	NA	0.00978895	NA	NA	0.00108597	0.00694325	0.000367544	0.00649039	NA	0.000152979	NA	NA
on.gene.LG11.334	NA	0.0022031	NA	NA	0.0369466	0.0011946	NA	0.000167794	0.00396572	NA	0.01927	NA	0.0159086	NA	NA
on.gene.LG11.415	NA	0.0380799	NA	NA	0.0102267	NA	0.00591364	0.0329942	NA	NA	NA	0.00873204	0.00383713	NA	0.0134364
on.gene.LG11.739	NA	0.000648977	0.0325658	0.000114559	NA	0.0176657	0.00825	NA	0.0222287	NA	NA	0.0441039	NA	NA	NA
on.gene.LG12.160	NA	0.0464672	NA	0.000655414	NA	NA	NA	0.00362979	NA	0.000791522	0.0130174	NA	NA	0.00064957	0.00697932
on.gene.LG12.260	NA	0.000300592	0.0235618	0.00074301	NA	0.0167671	NA	0.00601114	NA	NA	NA	0.004788	NA	NA	0.00155496
on.gene.LG12.367	NA	0.00328777	NA	0.0196975	NA	0.000220879	0.00314442	NA	0.0281482	0.00154284	NA	NA	NA	0.0182875	NA
on.gene.LG12.745	NA	0.0302638	NA	NA	0.0017569	0.000453663	NA	NA	0.0267809	0.0282873	0.0066962	NA	0.00634988	NA	NA
on.gene.LG12.76	NA	0.011669	0.0156127	0.00640932	NA	NA	NA	0.0136894	NA	NA	NA	0.0345604	NA	0.0339869	0.0172266
on.gene.LG12.964	NA	0.0170566	0.00267543	NA	0.0470687	NA	NA	NA	0.0187552	NA	0.0133269	NA	0.0459079	0.000517375	NA
on.gene.LG13.154	NA	0.0188051	0.0231449	NA	NA	NA	0.00450866	NA	NA	0.035454	NA	0.0293714	0.00801927	NA	0.0315748
on.gene.LG13.1920001	NA	0.0367174	NA	0.0173645	NA	NA	NA	0.00151195	0.00371228	0.00848848	0.000435188	NA	0.00752023	NA	NA
on.gene.LG13.260001	NA	0.0157057	NA	0.00715728	NA	0.027147	NA	0.0312498	NA	NA	NA	0.0392863	0.0036289	NA	0.000961813
on.gene.LG13.465	NA	0.0320802	NA	NA	0.0331078	NA	0.0395365	0.00273548	NA	NA	NA	0.0332999	0.0197533	NA	0.0434404
on.gene.LG13.841	NA	0.0309495	NA	NA	0.00139671	0.0108207	NA	0.000130362	0.000770926	NA	0.000209871	NA	0.0221176	NA	NA
on.gene.LG13.876	NA	0.0216283	0.0311642	NA	NA	NA	NA	0.00266287	NA	NA	NA	0.0340523	0.00960128	0.000873595	0.00468168
on.gene.LG13.905	NA	0.00226353	NA	0.0132502	NA	0.0338575	NA	NA	NA	0.000104308	NA	0.00349704	0.00453814	NA	0.00188499
on.gene.LG13.906	NA	0.00330406	0.0485457	0.00022972	NA	0.0258372	NA	NA	0.0491501	NA	NA	0.000105096	NA	0.00131347	NA
on.gene.LG13.92	NA	0.0125275	NA	0.0442351	NA	0.00415378	NA	NA	NA	0.011331	NA	0.000275544	0.00241227	NA	0.0320052
on.gene.LG14.427	NA	0.0131116	NA	NA	0.00505237	NA	0.0176862	0.000158533	NA	NA	NA	0.0247633	NA	0.000832891	0.0231746
on.gene.LG14.844	NA	0.00691139	NA	NA	NA	0.00168104	NA	0.00147017	0.0165751	0.0460084	0.0365654	NA	0.014983	NA	NA
on.gene.LG15.20001	NA	0.000517711	NA	0.0270401	NA	NA	NA	0.00169568	NA	0.00108966	0.00300879	NA	NA	0.00307081	0.00486098
on.gene.LG15.348	NA	0.049485	NA	0.0389859	NA	0.0188497	NA	NA	NA	0.0342341	NA	0.0149073	0.000371278	NA	0.001674
on.gene.LG16-21.225	NA	0.0429057	0.0410623	NA	NA	NA	0.000702115	0.000591265	NA	0.00726402	0.000117284	NA	NA	NA	0.0390984
on.gene.LG16-21.251	NA	0.0181898	0.0230072	0.0228057	NA	NA	0.0217949	0.0135856	0.0252283	NA	NA	0.00145016	NA	NA	NA
on.gene.LG16-21.3230001	NA	0.000190842	NA	0.000171921	NA	0.00450845	NA	NA	NA	0.000320667	NA	0.00273849	0.0131594	NA	0.000780418
on.gene.LG16-21.339	NA	0.000883532	NA	NA	0.000980786	NA	0.0180339	0.0148488	NA	NA	NA	0.00352934	0.0439783	NA	0.00940167
on.gene.LG16-21.528	NA	0.00495909	NA	NA	NA	0.000303637	NA	0.0479738	0.00605357	0.000404892	0.0287753	NA	0.0153447	NA	NA
on.gene.LG16-21.624	NA	0.000198103	NA	0.00154817	NA	0.011394	0.000601137	NA	0.000373268	NA	NA	0.00718085	NA	0.0157729	NA
on.gene.LG16-21.70	NA	0.0400874	NA	NA	0.0422328	0.00379753	NA	0.0119961	NA	0.00953394	0.00463114	NA	0.00195666	NA	NA
on.gene.LG17.258	NA	0.00591655	0.041136	0.00265769	NA	NA	0.00127195	0.0468458	0.00187461	NA	NA	0.000108014	NA	NA	NA
on.gene.LG17.278	NA	0.00136158	NA	NA	0.000168278	NA	0.00520099	0.00587502	NA	NA	NA	0.0157874	0.0148051	NA	0.0116216
on.gene.LG17.4	NA	0.000561072	NA	NA	0.000322782	0.00335203	NA	0.000196449	NA	0.00173408	0.00496946	NA	0.0446717	NA	NA
on.gene.LG18.2560001	NA	0.000822935	0.00130038	0.0214866	NA	NA	0.00387939	NA	NA	0.000180483	0.00770733	NA	0.000818405	NA	NA
on.gene.LG18.627	NA	0.000426023	NA	NA	0.00962719	0.0143496	NA	0.0142572	0.0121189	0.00418448	NA	NA	0.013656	NA	NA
on.gene.LG18.654	NA	0.000600169	NA	NA	0.000152996	0.0258372	NA	NA	0.00010043	0.0273655	0.0182723	NA	0.0383005	NA	NA
on.gene.LG18.669	NA	0.0189567	0.0141094	0.0397244	NA	NA	NA	0.00205913	NA	0.0231687	NA	NA	NA	0.00100132	0.00635813
on.gene.LG19.1070001	NA	0.0440427	0.0049356	NA	0.00126088	0.000824953	NA	NA	0.0139007	NA	NA	NA	0.00640861	0.0307406	NA
on.gene.LG19.1230001	NA	0.0123422	NA	NA	0.0185714	0.0079836	NA	0.00449624	NA	0.0234481	0.0123664	NA	0.00141707	NA	NA
on.gene.LG19.169	NA	0.00376083	NA	NA	0.00038541	0.00890515	NA	NA	0.00340702	0.0310336	0.00220347	NA	0.00187055	NA	NA
on.gene.LG19.178	NA	0.000265833	0.00697338	0.00164205	NA	NA	NA	0.000557207	NA	0.0297093	0.0145043	NA	NA	0.000294744	NA
on.gene.LG19.228	NA	0.000866678	0.00541865	0.0112596	NA	NA	NA	0.000102144	NA	0.000596543	0.00308587	NA	NA	NA	0.000170431
on.gene.LG19.672	NA	0.000792949	0.0318643	0.0314015	NA	NA	NA	0.000324918	NA	NA	NA	0.0139375	NA	0.0129395	0.0147373
on.gene.LG19.675	NA	0.00766291	NA	NA	NA	0.000241454	0.0058649	0.000233321	NA	0.000607667	0.0103419	NA	NA	0.0154994	NA
on.gene.LG19.676	NA	0.0055292	NA	NA	0.000130145	NA	NA	0.0119274	0.0346068	0.0177004	0.0267509	NA	0.0072916	NA	NA
on.gene.LG19.702	NA	0.0351257	NA	0.0026455	NA	0.00430933	0.0348727	0.000456791	0.0035805	NA	NA	0.00751053	NA	NA	NA
on.gene.LG19.721	NA	0.00454858	NA	NA	0.000113931	NA	NA	0.0101294	NA	NA	NA	0.00231861	0.000973537	0.00509111	0.00117208
on.gene.LG2.31	NA	0.00332852	NA	NA	0.0435058	0.000296372	NA	0.0240417	NA	0.000347706	0.00879267	NA	0.000174038	NA	NA
on.gene.LG2.331	NA	0.0293703	NA	NA	0.00108289	0.0467772	NA	0.00221652	NA	0.0170818	0.00307107	NA	NA	NA	0.000163884
on.gene.LG2.489	NA	0.00062288	0.000121453	NA	NA	0.00107897	NA	0.00828722	NA	NA	NA	0.0438646	0.00198761	0.000247076	NA
on.gene.LG2.546	NA	0.00503887	NA	NA	0.00202863	NA	0.0230013	0.00154969	NA	NA	NA	NA	0.000121737	0.0192663	0.0248629
on.gene.LG2.625	NA	0.00341938	NA	NA	0.00353493	NA	0.000894442	NA	NA	NA	NA	0.0061323	0.00132358	0.0195225	0.00045715
on.gene.LG2.81	NA	0.00558661	NA	0.0355077	NA	0.00548553	NA	NA	NA	0.00556599	NA	0.000165202	0.00299682	NA	0.0251732
on.gene.LG20.307	NA	0.039606	NA	NA	0.000496747	NA	0.00626582	0.000323802	NA	NA	NA	0.006059	0.0373584	0.00447861	NA
on.gene.LG20.421	NA	0.0177869	NA	NA	0.0387144	0.0441362	NA	0.0170599	NA	0.0171176	0.0370382	NA	NA	NA	0.000474117
on.gene.LG20.490	NA	0.0428818	0.0384852	NA	NA	0.00628453	NA	0.000648837	NA	NA	NA	0.0182953	NA	0.000920047	0.0298943
on.gene.LG20.514	NA	0.000668537	NA	NA	0.000771986	0.000918427	NA	0.00550117	NA	0.00501193	0.000434006	NA	0.0464313	NA	NA
on.gene.LG20.817	NA	0.00827674	NA	0.0138056	NA	NA	0.00761217	NA	0.00245901	0.0244183	0.0024061	NA	0.000706423	NA	NA
on.gene.LG20.82	NA	0.0117318	NA	NA	0.000185284	NA	0.0059148	0.00188372	NA	NA	NA	0.000143682	0.00430622	0.0320162	NA
on.gene.LG20.926	NA	0.0450993	NA	0.0193633	NA	NA	0.0204073	0.00228789	NA	0.0276153	0.00263549	NA	0.00184344	NA	NA
on.gene.LG20.96	NA	0.0092941	0.0114173	0.00179616	NA	NA	NA	0.0236637	NA	0.0212786	0.00643056	NA	NA	NA	0.0238715
on.gene.LG22.257	NA	0.042888	NA	NA	NA	0.00150392	0.00207376	NA	0.000404762	0.00191815	NA	0.000217046	NA	0.00324895	NA
on.gene.LG22.347	NA	0.000301441	NA	NA	0.0111442	0.00571498	NA	0.00133814	0.0323759	0.0340133	NA	NA	0.00223381	NA	NA
on.gene.LG22.467	NA	0.00580247	NA	0.0497607	NA	0.0226672	0.0420914	0.00922721	0.0028384	NA	NA	0.000874231	NA	NA	NA
on.gene.LG23.457	NA	0.0119813	0.0159516	0.000178888	NA	NA	0.0016918	NA	0.0457355	0.000713292	NA	0.0408222	NA	NA	NA
on.gene.LG23.507	NA	0.000337019	NA	NA	0.000641087	0.00106722	NA	0.000227697	0.0180072	0.000798359	0.00436587	NA	NA	NA	NA
on.gene.LG23.541	NA	0.000337579	NA	NA	0.0103559	0.0150364	NA	0.00155061	0.00430284	0.0374932	NA	NA	0.0358829	NA	NA
on.gene.LG3.332	NA	0.0197064	0.00972103	NA	NA	NA	0.000420727	0.000157663	0.00703074	NA	0.0115983	NA	0.0431389	NA	NA
on.gene.LG3.350	NA	0.0341699	0.0295627	0.00234666	NA	NA	NA	0.00378627	0.000160022	0.00384043	0.000303722	NA	NA	NA	NA
on.gene.LG4.105	NA	0.000375921	NA	0.0117584	NA	NA	NA	0.0136894	0.00826009	0.0168929	0.000347204	NA	0.00912037	NA	NA
on.gene.LG4.259	NA	0.0403121	NA	NA	0.0355657	0.018534	NA	0.00158179	0.0290137	NA	0.00837688	NA	0.0266679	NA	NA
on.gene.LG4.3	NA	0.0437477	0.000181172	0.00132384	NA	NA	NA	0.00735739	NA	NA	NA	0.0386106	NA	0.00334933	0.013892
on.gene.LG4.658	NA	0.00170419	0.0092007	0.000493605	NA	NA	NA	0.013641	NA	0.000773912	NA	NA	NA	0.00992023	0.000678016
on.gene.LG4.8960001	NA	0.0315642	0.0282594	0.00145101	NA	0.000231091	NA	NA	NA	NA	NA	0.004732	NA	0.0123375	0.000598543
on.gene.LG5.226	NA	0.0156765	NA	NA	0.0165664	0.0276541	NA	0.000828055	0.0191838	NA	0.0253218	NA	0.0294442	NA	NA
on.gene.LG5.278	NA	0.000201813	0.00535208	NA	0.00399045	NA	NA	NA	0.0477223	0.00238145	NA	0.00238562	NA	0.000291486	NA
on.gene.LG5.664	NA	0.00346365	NA	NA	0.0155534	NA	NA	0.00390045	0.00172506	0.0255865	0.0162147	NA	0.0115874	NA	NA
on.gene.LG5.6930001	NA	0.0209775	NA	NA	0.00656645	0.0319883	NA	0.00288891	0.0049358	0.0141524	NA	NA	0.0189973	NA	NA
on.gene.LG5.893	NA	0.0399192	0.000138145	0.0120229	NA	NA	NA	0.000309691	NA	0.000153485	0.0194261	NA	NA	0.0202839	NA
on.gene.LG5.948	NA	0.000783765	NA	0.0345077	NA	NA	NA	0.00120869	NA	0.000811301	0.000360034	NA	NA	0.0236434	0.00940167
on.gene.LG6.338	NA	0.0301779	0.0418295	NA	0.000199337	NA	NA	NA	NA	NA	NA	0.00767751	0.0180422	0.000107685	0.0141831
on.gene.LG6.478	NA	0.000785048	NA	0.0283393	NA	0.00377323	0.0335771	NA	NA	0.000352976	NA	0.0216885	NA	0.00717352	NA
on.gene.LG6.628	NA	0.0157142	0.00205531	NA	NA	0.0405366	NA	0.0121427	0.000181808	NA	0.000216818	NA	0.0408985	NA	NA
on.gene.LG6.660	NA	0.00371197	0.0133086	0.00324958	NA	NA	0.00183914	0.000823072	0.000101775	NA	NA	NA	0.0196111	NA	NA
on.gene.LG6.793	NA	0.00716983	NA	NA	0.00225133	0.000856055	NA	0.000131641	0.0201512	0.00393208	0.000475413	NA	NA	NA	NA
on.gene.LG6.991	NA	0.00837026	NA	NA	0.000721734	NA	0.0127169	0.00123794	NA	NA	NA	NA	0.00164536	0.0194912	0.0431001
on.gene.LG7.113	NA	0.0025851	NA	0.000416199	NA	0.000836842	0.00293815	NA	0.0101892	NA	NA	0.00275421	NA	0.000209829	NA
on.gene.LG7.1252	NA	0.0006684	NA	NA	0.00532052	NA	0.00328119	0.0417487	NA	NA	NA	NA	0.0292512	0.0255667	0.000196458
on.gene.LG7.1401	NA	0.000967121	0.000628933	NA	0.00543733	NA	NA	NA	0.0401791	0.00181826	NA	0.0173761	NA	0.0058065	NA
on.gene.LG7.2300001	NA	0.00543677	NA	NA	0.000893164	NA	0.0223366	0.00249694	NA	NA	NA	0.0434913	NA	0.0454174	0.0455835
on.gene.LG7.417	NA	0.000168155	NA	0.00203248	NA	NA	0.0252605	NA	0.0263125	NA	0.000140414	NA	0.0418635	0.000207634	NA
on.gene.LG7.537	NA	0.00384717	NA	NA	0.0192754	0.00203051	NA	0.00216993	NA	0.00664681	0.018493	NA	0.000530619	NA	NA
on.gene.LG7.561	NA	0.0036282	NA	NA	0.000119092	NA	0.000595064	NA	NA	NA	NA	0.00010831	0.000510794	0.000354862	0.00617858
on.gene.LG7.597	NA	0.00126705	0.000373762	NA	NA	NA	0.019272	0.0482476	NA	0.000371392	NA	NA	0.0208849	NA	0.0469375
on.gene.LG7.611	NA	0.00581877	0.0247704	0.0031957	NA	NA	NA	0.000571797	NA	0.0418452	0.00972779	NA	NA	NA	0.0096053
on.gene.LG7.862	NA	0.00150822	NA	NA	0.00188753	NA	NA	0.0220567	NA	NA	NA	0.000155085	0.0220902	0.00698699	0.0466998
on.gene.LG8-24.832	NA	0.00195755	0.0410623	0.0305158	NA	NA	NA	0.000983475	NA	NA	NA	0.00196331	NA	0.0492794	0.0408483
on.gene.LG9.1210001	NA	0.0329468	NA	NA	0.00125576	NA	0.000282476	0.0153245	NA	NA	NA	0.000165693	NA	0.00438746	0.0061382
on.gene.LG9.155	NA	0.00153115	NA	NA	0.0047602	0.0124465	NA	0.0263895	NA	0.0462034	0.00341229	NA	NA	NA	0.000810426
on.gene.LG9.299	NA	0.00755776	NA	0.0354177	NA	0.00918604	NA	NA	NA	0.0303883	NA	0.000594981	0.010865	NA	0.0445155
on.gene.LG9.313	NA	0.000163151	NA	0.000272347	NA	0.00153493	0.00502744	0.0389291	0.00208187	NA	NA	0.00044596	NA	NA	NA
on.gene.LG9.44	NA	0.00174711	NA	0.0282781	NA	0.0120989	NA	0.0321691	NA	NA	NA	0.000183855	0.00303097	NA	0.00958104
on.gene.UNK103.17	NA	0.0322831	NA	NA	0.00446715	0.00055151	NA	0.000767166	0.00148602	NA	0.00390563	NA	0.00010881	NA	NA
on.gene.UNK108.6	NA	0.000513778	NA	0.00522191	NA	0.00787552	NA	0.0168734	NA	NA	NA	0.000340598	0.00256889	NA	0.00193433
on.gene.UNK11.5	NA	0.00703716	0.00116428	0.000542178	NA	0.00108624	0.0101028	0.00676272	NA	NA	NA	0.00725718	NA	NA	NA
on.gene.UNK142.3	NA	0.00244963	0.0426133	0.0236065	NA	0.000612819	0.0263833	0.00224516	0.00164644	NA	NA	NA	NA	NA	NA
on.gene.UNK143.6	NA	0.000123357	0.0238342	0.00603789	NA	NA	NA	0.000242647	0.00610265	0.0143875	0.00569182	NA	NA	NA	NA
on.gene.UNK163.6	NA	0.00167177	NA	NA	0.0398379	NA	0.0239575	0.0289444	NA	NA	NA	NA	0.026937	0.0177798	0.00045447
on.gene.UNK19.260001	NA	0.0152728	NA	NA	0.0289294	0.00740902	NA	0.0255397	0.00115055	0.00445141	0.0195023	NA	NA	NA	NA
on.gene.UNK195.5	NA	0.000243234	0.00394691	0.00109641	NA	0.0159822	NA	0.000387289	0.0168979	NA	NA	0.00249429	NA	NA	NA
on.gene.UNK198.4	NA	0.000508184	NA	0.0394647	NA	NA	NA	0.00071179	NA	0.0129073	0.00824354	NA	NA	0.00198031	0.000721836
on.gene.UNK28.11	NA	0.00621934	NA	NA	0.0486413	0.0048856	NA	NA	0.0467922	0.0295994	0.000245732	NA	0.00356887	NA	NA
on.gene.UNK38.26	NA	0.0494937	NA	NA	0.0370104	0.0380214	NA	0.000729887	0.0396082	NA	0.0305568	NA	0.0406337	NA	NA
on.gene.UNK445.1	NA	0.0139013	NA	NA	NA	0.0105503	0.000487804	NA	0.0351502	0.0292276	0.00017521	NA	NA	0.0025198	NA
on.gene.UNK5.74	NA	0.0258462	NA	NA	0.0071405	0.00036599	NA	NA	0.0158279	0.00518493	0.00125122	NA	0.000711118	NA	NA
on.gene.UNK50.11	NA	0.0449133	0.00100313	0.00942924	NA	NA	NA	0.00363598	NA	0.000106151	0.00248112	NA	NA	0.0090553	NA
on.gene.UNK6.22	NA	0.0414992	NA	NA	0.0041332	0.0113588	NA	0.000104598	0.00998553	NA	0.00142861	NA	0.00628939	NA	NA
on.gene.UNK66.3	NA	0.000178186	NA	NA	0.0108498	NA	0.000366856	0.00581478	NA	NA	NA	0.0113152	NA	0.000720784	0.0126384
on.gene.UNK80.13	NA	0.0113728	0.000800925	0.000213196	NA	NA	0.000720667	0.0148444	0.0183935	NA	NA	0.00136271	NA	NA	NA
on.gene.UNK83.19	NA	0.00321158	NA	NA	0.0407866	NA	NA	0.000382702	NA	0.000934996	0.00512153	NA	NA	0.00657292	0.0201547
on.gene.UNK88.10	NA	0.0212487	NA	NA	0.0117312	NA	0.000661124	0.0414981	NA	NA	NA	NA	0.0328989	0.00334118	0.000807841
on.gene.UNK88.13	NA	0.0408883	NA	NA	0.00340166	NA	0.000161507	NA	NA	NA	NA	0.0318166	0.00188219	0.00851903	0.00214726
on.gene.UNK9.7	NA	0.00540559	NA	NA	0.0171427	0.00302763	NA	NA	0.0215517	0.0385418	0.000466888	NA	0.00289806	NA	NA
on.gene.UNK92.2	NA	0.00107265	0.0196182	0.00677066	NA	0.0241716	NA	0.00165827	0.0218174	NA	NA	0.00222258	NA	NA	NA
on.gene.UNK94.9	NA	0.00147834	NA	NA	0.00991174	NA	NA	0.000603472	0.00201037	0.0171357	0.0269747	NA	0.0372021	NA	NA
on.gene.LG1.285	NA	NA	0.00613421	0.000218818	NA	NA	0.0423789	0.0469452	0.00991384	0.0108765	0.000785488	NA	NA	NA	NA
on.gene.LG1.666	NA	NA	0.0335063	0.0218007	0.00261661	NA	NA	NA	0.0224016	NA	NA	NA	0.000948218	0.0216638	0.00750532
on.gene.LG11.184	NA	NA	0.0159538	0.00348134	0.0267891	NA	NA	NA	NA	0.000101747	0.025893	0.000344727	NA	NA	0.000118231
on.gene.LG12.658	NA	NA	0.00125167	0.000496163	NA	NA	NA	NA	0.000596269	0.00173739	0.00119119	NA	NA	0.0095449	0.00468121
on.gene.LG14.23	NA	NA	0.00469476	0.0348407	0.00921499	NA	NA	NA	NA	0.0155903	NA	0.000338513	NA	0.000531076	0.00798804
on.gene.LG14.446	NA	NA	0.000774229	0.0440011	0.00591765	NA	NA	NA	NA	0.00014194	0.0237967	0.00196698	NA	0.0142089	NA
on.gene.LG14.453	NA	NA	0.00237917	0.0170461	0.000125271	NA	NA	NA	0.00150853	0.000311262	0.00588955	NA	NA	0.012779	NA
on.gene.LG14.482	NA	NA	0.0393909	0.000550873	NA	NA	0.0011716	0.0212443	NA	NA	0.0328717	0.000200404	0.0477635	NA	NA
on.gene.LG14.695	NA	NA	0.00978872	0.0195679	0.000450856	NA	0.000947821	NA	NA	0.0481494	NA	0.00639006	0.00881922	NA	NA
on.gene.LG15.526	NA	NA	0.021894	NA	NA	0.0171912	NA	0.0114099	NA	NA	NA	0.0110557	0.0330794	0.0415335	0.000328643
on.gene.LG15.527	NA	NA	0.00184931	0.0172569	0.000210319	NA	0.0337021	NA	NA	0.000429096	0.0111432	NA	0.0166659	NA	NA
on.gene.LG17.465	NA	NA	0.0127034	0.000723823	0.00547244	NA	0.0203785	NA	NA	0.000303315	NA	0.000149669	0.000907278	NA	NA
on.gene.LG17.670	NA	NA	0.00893395	NA	0.00454655	NA	0.0156463	NA	NA	0.000193151	0.00701183	0.000111391	0.000627314	NA	NA
on.gene.LG18.475	NA	NA	0.0375261	0.000339264	0.00163599	NA	NA	NA	NA	0.0368382	0.000615454	0.00255565	NA	NA	0.0160854
on.gene.LG22.77	NA	NA	0.000263769	NA	0.000670655	NA	0.000100722	NA	NA	0.0128944	0.000151755	0.0396263	0.0072284	NA	NA
on.gene.LG23.108	NA	NA	0.00263444	0.015702	0.00479467	NA	0.0104314	NA	NA	0.0148242	NA	0.0348548	0.0482004	NA	NA
on.gene.LG23.76	NA	NA	0.000330368	0.00163073	0.00586299	NA	0.000379037	NA	NA	NA	0.000886997	0.00289451	0.000143199	NA	NA
on.gene.LG4.269	NA	NA	0.000297334	NA	NA	NA	NA	NA	0.00614616	0.00727086	0.000379809	0.000619415	NA	0.0406621	0.00259451
on.gene.LG4.272	NA	NA	0.042689	0.00719452	0.0297564	NA	NA	NA	0.0125948	NA	0.022388	NA	NA	0.0142742	0.00249519
on.gene.LG4.376	NA	NA	0.0339876	0.00190527	0.000120113	NA	0.00237479	NA	NA	0.0123968	0.000847593	NA	0.000818405	NA	NA
on.gene.LG4.879	NA	NA	0.00259364	0.000409267	0.0155174	NA	NA	NA	NA	0.0113285	0.00360852	NA	NA	0.0100794	0.00227277
on.gene.LG5.684	NA	NA	0.026241	0.00172451	NA	0.00252676	0.0246699	0.0165829	0.0190133	NA	NA	0.0261199	NA	NA	NA
on.gene.LG6.80	NA	NA	0.0240577	0.00895737	0.000587563	NA	0.0322818	NA	NA	0.0497464	0.0295992	0.00274824	NA	NA	NA
on.gene.LG6.867	NA	NA	0.00339492	0.0175354	NA	0.00257847	0.00610463	0.00806725	0.0186878	NA	NA	0.00781857	NA	NA	NA
on.gene.LG7.1351	NA	NA	0.0102784	0.0364837	0.00613867	0.000527596	NA	NA	0.0340615	NA	NA	NA	0.00309005	0.0383415	NA
on.gene.LG7.79	NA	NA	0.0260205	0.0433653	NA	NA	NA	NA	NA	0.000115137	0.000818076	0.0481235	NA	0.000265077	0.00116911
on.gene.LG7.994	NA	NA	0.00513112	NA	NA	0.0309357	NA	0.00597345	0.000182514	NA	0.00942172	0.000272566	NA	NA	0.00512164
on.gene.LG8-24.602	NA	NA	0.0334624	NA	NA	0.0194297	0.0493715	0.0068212	0.0161196	NA	NA	0.00435271	NA	NA	0.0493223
on.gene.UNK118.6	NA	NA	0.00718642	NA	0.0019638	NA	NA	NA	0.00302362	0.0417012	0.000732174	0.02337	NA	0.00748395	NA
on.gene.UNK274.3	NA	NA	0.00697047	0.0272585	0.000698866	NA	0.00112304	NA	NA	0.0309356	NA	0.00687924	0.00794565	NA	NA
on.gene.UNK3.111	NA	NA	0.00608538	0.000613515	NA	NA	0.00199628	NA	NA	0.0342712	0.00721476	0.000300178	0.0156435	NA	NA
on.gene.UNK7.17	NA	NA	0.0447398	0.00818699	0.0168519	NA	NA	NA	NA	0.040789	0.0122011	0.0231695	NA	NA	0.0459842
on.gene.LG1.124	NA	NA	NA	0.0179649	NA	NA	NA	NA	0.000684099	0.0201842	0.00147151	0.00525994	NA	0.00365537	0.00012993
on.gene.LG11.922	NA	NA	NA	0.0100078	0.014043	NA	0.0135955	NA	NA	0.00903056	0.00113079	0.00133654	0.00122935	NA	NA
on.gene.LG12.5	NA	NA	NA	0.0237116	0.000405832	NA	0.0190413	0.0158168	NA	NA	0.0207374	0.000236904	0.0117915	NA	NA
on.gene.LG12.530	NA	NA	NA	0.0128413	0.00586372	NA	0.00167881	NA	NA	NA	0.0104222	0.00390432	0.000899896	0.0293305	NA
on.gene.LG13.527	NA	NA	NA	0.000428298	0.00025358	NA	NA	NA	0.0234039	0.0166751	0.0298715	0.0298126	NA	NA	0.0199357
on.gene.LG14.365	NA	NA	NA	0.0130875	0.000225152	NA	NA	0.00563936	0.00141708	NA	0.0284637	0.000586128	NA	NA	0.0359015
on.gene.LG14.587	NA	NA	NA	0.0125967	0.00284092	0.00690408	NA	0.0409624	0.00047963	NA	NA	NA	0.00100972	NA	0.00267993
on.gene.LG14.86	NA	NA	NA	0.0385935	NA	0.0143496	0.0136734	NA	0.0373998	0.0270958	NA	0.0422955	NA	0.0287048	NA
on.gene.LG15.433	NA	NA	NA	0.00133106	0.000122262	NA	NA	0.0107832	0.0055088	NA	0.00274031	0.000217432	NA	NA	0.0239618
on.gene.LG18.298	NA	NA	NA	0.00457982	0.0318244	NA	0.00387939	NA	NA	0.0428243	0.00396346	0.0261086	0.00254306	NA	NA
on.gene.LG20.193	NA	NA	NA	0.00535624	0.00472437	NA	0.00140195	NA	NA	NA	0.00206001	0.00141028	0.000342207	0.0465735	NA
on.gene.LG20.210	NA	NA	NA	0.0352847	0.00129611	NA	NA	0.0314458	0.000603548	0.0361839	0.000314375	NA	NA	NA	0.0187775
on.gene.LG20.374	NA	NA	NA	0.0099891	0.00137902	NA	0.0248995	0.0122216	NA	NA	0.0140064	0.00145367	0.0256577	NA	NA
on.gene.LG22.345	NA	NA	NA	0.00014303	0.014088	NA	0.0137825	0.0010693	NA	0.0203719	0.0450243	NA	NA	0.00109471	NA
on.gene.LG4.435	NA	NA	NA	0.00445675	0.000137471	NA	NA	0.0406453	0.000766284	0.0103229	NA	NA	0.000121303	NA	0.0125151
on.gene.LG5.428	NA	NA	NA	0.0343204	0.000202781	NA	NA	0.0245996	0.000253206	0.0307702	0.00106032	NA	NA	NA	0.0335326
on.gene.LG5.521	NA	NA	NA	0.000571158	0.00494631	NA	0.0017013	0.0397892	NA	0.000605859	0.0286641	NA	0.0484162	NA	NA
on.gene.LG6.266	NA	NA	NA	0.00515322	0.0252105	NA	NA	0.000325322	0.00521416	NA	0.010953	0.0488702	NA	NA	0.000823149
on.gene.LG6.678	NA	NA	NA	0.0169897	0.0469184	NA	NA	0.0144837	0.0480951	NA	0.0335367	0.00927483	NA	NA	0.0223433
on.gene.LG8-24.184	NA	NA	NA	0.0418955	0.000339879	NA	NA	0.00572096	0.000472881	NA	0.0318829	0.000149301	NA	NA	0.0435128
on.gene.LG8-24.263	NA	NA	NA	0.0219185	0.00143608	NA	0.000137459	NA	NA	NA	0.0327287	0.00173999	0.000127522	0.0430052	NA
on.gene.LG8-24.578	NA	NA	NA	0.00222517	NA	0.000641361	NA	0.00258941	0.00067597	0.0321084	NA	NA	0.0102279	NA	0.028452
on.gene.UNK113.19	NA	NA	NA	0.0189014	0.0269454	NA	NA	NA	0.0342479	0.0333793	0.00388727	0.004439	NA	NA	0.0209633
on.gene.UNK20.18	NA	NA	NA	0.00141049	0.001187	0.000108215	NA	NA	0.00169266	0.0109196	NA	NA	0.000115194	NA	0.00165948
on.gene.UNK36.6	NA	NA	NA	0.000543553	0.00185466	NA	NA	NA	0.000529214	NA	0.0180454	0.0444903	NA	0.0237876	0.000112685
on.gene.UNK39.17	NA	NA	NA	0.0499786	0.0178894	0.00117469	NA	0.000628753	0.0132127	0.0156671	NA	NA	0.00232709	NA	NA
on.gene.LG1.336	NA	NA	NA	NA	0.00228173	0.0237148	NA	0.000618391	0.0462019	0.0349182	0.000536699	NA	0.00144262	NA	NA
on.gene.LG12.207	NA	NA	NA	NA	0.0471942	NA	0.0246058	0.0144305	NA	NA	NA	0.0130001	0.00464685	0.00728466	0.0224482
on.gene.LG13.328	NA	NA	NA	NA	0.00383326	NA	NA	NA	0.00242494	0.012311	0.017312	0.000455669	NA	0.0345051	0.0326033
on.gene.LG14.786	NA	NA	NA	NA	0.0356637	0.00808029	0.000588476	NA	NA	0.00102415	0.000180283	NA	NA	0.00345366	0.0107937
on.gene.LG17.294	NA	NA	NA	NA	0.024143	0.0155508	NA	0.023484	0.000900937	0.0123108	NA	NA	0.000409199	NA	0.00550073
on.gene.LG4.808	NA	NA	NA	NA	0.00604835	0.0279438	NA	0.0260737	NA	0.00408874	0.00115685	NA	NA	0.0243432	0.000542587
on.gene.LG6.647	NA	NA	NA	NA	0.000589032	0.0413454	NA	0.0208669	0.000845709	0.00107576	0.000201257	NA	0.0387865	NA	NA
on.gene.UNK12.42	NA	NA	NA	NA	0.0304546	NA	NA	NA	0.000957882	0.0486419	0.0390007	0.00672035	NA	0.0120689	0.00749997
on.gene.UNK233.3	NA	NA	NA	NA	0.00106977	0.010059	NA	0.00011825	0.000287719	0.00163013	0.000448623	NA	0.00270639	NA	NA
on.gene.UNK2654.1	NA	NA	NA	NA	0.000128912	NA	0.00898536	0.00946224	NA	NA	0.000157113	0.000608548	0.0271798	0.00377913	NA
on.gene.UNK3.83	NA	NA	NA	NA	0.0137488	0.00535659	NA	0.0450991	0.00887458	0.0007163	0.000843794	NA	0.0101456	NA	NA
on.gene.UNK48.10	NA	NA	NA	NA	0.00156911	NA	0.00949349	0.0120471	NA	NA	NA	0.000108263	0.00107952	0.0487456	0.000273527
on.gene.LG13.520	NA	NA	NA	NA	NA	0.00016739	0.0153087	NA	0.000438657	0.000172339	NA	0.000275497	NA	0.0131212	0.0282022
on.gene.LG14.443	NA	NA	NA	NA	NA	0.0167671	0.0289155	NA	0.0105646	0.0166721	NA	0.00559441	NA	0.024226	0.000642905
on.gene.LG16-21.572	NA	NA	NA	NA	NA	0.00596696	0.0348676	NA	0.0347072	0.00488009	0.000203757	NA	NA	0.0359887	0.00182185
on.gene.LG18.546	NA	NA	NA	NA	NA	0.00362877	0.00080048	NA	0.0166561	0.00301916	0.0455444	NA	NA	0.000758202	0.0137233
on.gene.LG4.5780002	NA	NA	NA	NA	NA	0.000902617	0.000449663	0.000118089	NA	0.00505406	0.00188409	NA	NA	0.00371203	0.000911802
on.gene.UNK2901.1	NA	NA	NA	NA	NA	0.0375979	0.00025367	NA	0.00187461	0.0374932	0.022096	NA	NA	0.000332499	0.000102393
on.gene.UNK2992.1	NA	NA	NA	NA	NA	0.0185058	NA	NA	0.000127613	0.00406439	0.0133114	0.000258893	NA	0.0189006	0.0066392
on.gene.UNK51.28	NA	NA	NA	NA	NA	0.0263615	0.00834684	NA	0.00224584	0.00190513	0.015339	0.00703321	NA	NA	0.00827968
on.gene.LG16-21.275	NA	NA	NA	NA	NA	NA	0.0420185	NA	0.0337853	0.0371509	0.00249361	0.000675217	NA	0.00307081	0.0473015
on.gene.LG7.1263	NA	NA	NA	NA	NA	NA	0.0223966	NA	0.000535396	0.00451373	0.00420243	0.00154598	NA	0.00182984	0.0011545
on.gene.LG1.166	0.0258837	NA	NA	0.0213646	NA	0.0141923	0.0254976	NA	NA	0.0120578	NA	NA	NA	0.0261138	NA
on.gene.LG1.22	0.00197807	0.00702135	NA	0.000767034	NA	0.0138348	NA	NA	NA	0.0196942	NA	NA	NA	NA	0.0110237
on.gene.LG1.341	0.000523255	NA	NA	0.00164406	0.000788012	NA	NA	0.00243234	0.00649919	NA	NA	NA	NA	NA	0.000308953
on.gene.LG1.393	0.0255526	0.000291475	NA	NA	0.0300569	0.000125363	NA	NA	NA	0.00935002	NA	NA	NA	NA	0.00115471
on.gene.LG1.4860001	0.00256098	NA	NA	0.000404474	0.000985337	NA	NA	0.00505277	0.0146715	NA	NA	NA	NA	NA	0.00512786
on.gene.LG1.55	0.00507975	0.0315955	0.0269718	NA	0.000210787	NA	NA	NA	0.00697465	NA	NA	0.0345072	NA	NA	NA
on.gene.LG1.561	0.000708301	NA	NA	0.0303306	0.0238012	NA	NA	NA	NA	NA	0.0173315	0.0263743	NA	NA	0.00145733
on.gene.LG1.86	0.0385787	NA	NA	NA	0.00485092	NA	NA	0.00132776	NA	NA	0.0294911	0.000993069	0.0473072	NA	NA
on.gene.LG1.88	0.00353889	0.0455418	NA	NA	0.00228231	NA	0.00255187	NA	NA	NA	NA	0.00168598	0.00164536	NA	NA
on.gene.LG1.90	0.0127861	NA	NA	NA	NA	NA	NA	0.00821196	0.000851294	NA	0.00110319	0.000500211	NA	NA	0.0012602
on.gene.LG10.133	0.00598798	NA	NA	NA	0.000150205	NA	0.019965	NA	NA	0.0226713	NA	NA	0.0051124	NA	0.000892249
on.gene.LG10.20	0.02501	0.0296447	NA	NA	NA	NA	NA	NA	0.0130163	0.0381046	NA	0.0423695	NA	0.0145552	NA
on.gene.LG10.211	0.000612959	0.000163322	NA	NA	0.0133206	NA	0.0264884	NA	NA	NA	0.00158056	NA	NA	NA	0.000183795
on.gene.LG10.266	0.044501	0.000397792	NA	0.00203166	NA	NA	0.00578693	NA	NA	NA	0.00623195	NA	0.0127715	NA	NA
on.gene.LG10.343	0.0273879	NA	NA	0.000267767	0.000330811	NA	NA	0.0343623	NA	NA	0.0114991	0.0152112	NA	NA	NA
on.gene.LG10.35	0.0459335	NA	NA	NA	NA	NA	NA	0.0299533	0.0102218	NA	0.00240077	0.000993691	NA	NA	0.0132987
on.gene.LG10.377	0.00177756	NA	NA	0.00352581	NA	NA	NA	0.0370172	0.00115972	NA	0.000171272	0.00723489	NA	NA	NA
on.gene.LG10.399	0.0203404	0.000182563	NA	NA	0.00730099	NA	NA	NA	NA	0.00668838	NA	NA	0.00687374	NA	0.0168638
on.gene.LG10.400	0.0451335	0.00651582	0.00733744	NA	0.000246957	NA	NA	NA	NA	NA	0.0155301	NA	NA	NA	0.0434987
on.gene.LG10.441	0.0308815	0.0415771	NA	NA	0.00534655	NA	NA	NA	NA	NA	0.0268337	NA	0.0228754	0.0312001	NA
on.gene.LG10.474	0.000131633	NA	NA	NA	NA	NA	NA	0.000365204	0.00298667	0.00841944	NA	NA	0.00221975	NA	0.000704869
on.gene.LG10.51	0.00490991	NA	NA	0.0383413	0.0257055	0.0423206	NA	NA	0.000591458	0.00313372	NA	NA	NA	NA	NA
on.gene.LG10.94	0.0307474	0.00113637	NA	NA	0.00100947	NA	NA	NA	0.0446452	0.000156402	NA	NA	0.0284757	NA	NA
on.gene.LG11.101	0.0176995	NA	NA	0.00101575	NA	0.000318188	NA	NA	NA	0.0051244	NA	NA	0.0148188	NA	0.0363939
on.gene.LG11.114	0.000363744	0.00133276	NA	NA	NA	0.000100812	NA	NA	NA	0.00466791	NA	0.0125986	0.000907278	NA	NA
on.gene.LG11.178	0.0298557	NA	NA	0.000136939	NA	0.0468804	NA	0.00140299	0.0279531	NA	NA	0.0151391	NA	NA	NA
on.gene.LG11.182	0.0210076	0.00589826	NA	0.0286913	NA	0.0205849	NA	NA	NA	0.00965448	NA	0.00163003	NA	NA	NA
on.gene.LG11.195	0.000291482	NA	NA	NA	NA	NA	NA	0.000274233	0.00801755	NA	0.000515046	0.000522524	NA	NA	0.00502368
on.gene.LG11.2140002	0.0476629	NA	NA	NA	NA	NA	NA	0.0252185	0.00820824	0.00154404	NA	NA	0.000301027	NA	0.0131423
on.gene.LG11.22	0.0159706	0.00145285	NA	0.0217997	NA	0.0414591	NA	NA	NA	0.0218686	NA	0.00144615	NA	NA	NA
on.gene.LG11.2210001	0.00757401	NA	NA	NA	NA	NA	0.000174218	NA	0.000533545	0.0248912	NA	NA	0.00742674	NA	0.0395456
on.gene.LG11.228	0.00339362	0.0131434	0.0308649	NA	0.000687876	0.000101805	0.000174917	NA	NA	NA	NA	NA	NA	NA	NA
on.gene.LG11.281	0.0193162	0.0187443	NA	0.0186391	NA	0.0362251	NA	NA	NA	0.0272968	NA	0.023738	NA	NA	NA
on.gene.LG11.291	0.0323471	NA	0.00541865	NA	NA	NA	0.0116044	NA	NA	0.00345201	NA	NA	0.00126842	NA	0.0126488
on.gene.LG11.333	0.0109924	NA	NA	0.00442622	0.000174807	NA	NA	0.000465836	NA	NA	0.0163986	0.000763343	NA	NA	NA
on.gene.LG11.374	0.0315402	NA	NA	0.0440564	0.00677163	NA	NA	0.00302942	NA	NA	NA	0.00777859	NA	NA	0.000798353
on.gene.LG11.3930001	0.0452563	0.000867663	NA	NA	0.0102159	NA	0.00087435	NA	NA	0.0211655	NA	0.000149301	NA	NA	NA
on.gene.LG11.463	0.0313982	NA	NA	NA	0.0359576	NA	NA	0.000162132	NA	NA	0.0040416	NA	0.000515946	0.00802644	NA
on.gene.LG11.501	0.00434582	NA	NA	0.000556596	NA	0.0201643	NA	0.0163106	NA	NA	NA	NA	0.0161325	NA	0.000525731
on.gene.LG11.548	0.000568036	NA	NA	NA	0.0192754	NA	0.0307304	NA	NA	NA	NA	0.0118243	0.0194216	0.00602782	NA
on.gene.LG11.55	0.00474457	NA	NA	0.00368794	0.0120825	NA	NA	0.0127719	NA	NA	0.000337186	0.00100837	NA	NA	NA
on.gene.LG11.565	0.0370083	NA	NA	NA	0.0171427	NA	NA	0.000563168	0.00107197	NA	NA	0.0246367	NA	NA	0.0403444
on.gene.LG11.571	0.000139661	NA	NA	0.00514859	0.0150245	NA	NA	0.000338387	NA	0.010404	NA	NA	NA	NA	0.0438875
on.gene.LG11.658	0.00299226	0.00716684	NA	0.000171436	NA	NA	NA	NA	0.00109451	NA	0.0342614	NA	NA	0.000496092	NA
on.gene.LG11.662	0.00319095	NA	NA	0.0370854	0.0308425	NA	NA	0.00148153	NA	NA	0.00629724	0.00348838	NA	NA	NA
on.gene.LG11.776	0.0430749	NA	NA	0.0230466	0.000160159	0.00247903	NA	NA	NA	0.00369013	NA	NA	0.0349468	NA	NA
on.gene.LG11.790	0.000767652	0.0417964	NA	NA	NA	0.00429049	NA	NA	NA	NA	NA	0.000356649	0.0435515	0.0399835	NA
on.gene.LG11.795	0.0273521	NA	NA	NA	0.0016507	0.00152304	NA	NA	NA	0.0250609	NA	NA	0.0312887	NA	0.029991
on.gene.LG11.811	0.00572936	NA	NA	0.0257893	NA	0.00798191	NA	NA	0.0435165	0.000734944	NA	NA	0.0394003	NA	NA
on.gene.LG11.848	0.000659951	NA	NA	0.00293935	0.0457042	0.000463891	NA	0.0123725	NA	NA	NA	NA	NA	0.0399941	NA
on.gene.LG11.886	0.00146638	NA	NA	0.0234162	NA	NA	0.026767	0.000867008	NA	NA	0.00042265	0.00100165	NA	NA	NA
on.gene.LG11.892	0.0226311	NA	NA	0.00770191	0.00430069	NA	NA	0.0121069	NA	NA	0.00918096	0.00446825	NA	NA	NA
on.gene.LG11.90	0.0418959	NA	NA	NA	0.00295523	NA	NA	0.000295368	0.000432433	NA	0.0025817	NA	NA	NA	0.0414324
on.gene.LG11.928	0.00323728	NA	NA	NA	0.00107464	0.00727608	NA	0.0345002	0.0196234	NA	NA	NA	NA	NA	0.00120986
on.gene.LG11.944	0.0345528	NA	NA	NA	0.00244599	NA	NA	0.011475	0.0138792	NA	NA	0.000660873	NA	NA	0.033585
on.gene.LG11.980	0.0433621	NA	NA	NA	0.00411549	NA	NA	0.00202854	0.000833091	NA	NA	0.0070825	NA	NA	0.0166123
on.gene.LG12.145	0.0189626	NA	NA	0.0284822	0.000404048	NA	NA	0.000171723	NA	NA	0.00289983	NA	0.0174701	NA	NA
on.gene.LG12.183	0.0231546	0.0245297	NA	NA	0.000721734	0.00103766	0.00883932	NA	NA	NA	NA	NA	NA	NA	0.000121369
on.gene.LG12.189	0.00046092	NA	NA	0.00418368	NA	0.0026936	NA	0.0152693	NA	0.000113869	NA	NA	NA	0.0113321	NA
on.gene.LG12.203	0.012277	NA	0.0374734	NA	NA	0.0366271	NA	NA	NA	NA	0.0129709	NA	0.0377606	0.0390025	NA
on.gene.LG12.236	0.0441399	0.0420878	NA	NA	NA	NA	NA	NA	0.0109094	0.000449489	NA	0.000256403	NA	0.0155936	NA
on.gene.LG12.24	0.00126201	NA	NA	NA	0.00045023	NA	NA	0.00507784	NA	NA	0.00142796	0.00647054	NA	NA	0.011245
on.gene.LG12.311	0.0098895	NA	NA	0.000737572	NA	0.0039186	NA	0.000748639	0.0402289	0.030077	NA	NA	NA	NA	NA
on.gene.LG12.350	0.000944325	NA	NA	NA	0.000105582	0.0314232	0.00673769	0.0335501	NA	NA	0.00655578	NA	NA	NA	NA
on.gene.LG12.356	0.000115511	NA	NA	0.00758267	0.000115002	NA	NA	NA	NA	NA	0.0172286	0.000189746	NA	NA	0.00268599
on.gene.LG12.414	0.00212977	NA	NA	NA	NA	NA	NA	0.0005016	0.000552525	NA	0.0412234	0.0221851	NA	NA	0.0014663
on.gene.LG12.423	0.007022	0.000161585	NA	0.00311328	NA	0.0371144	NA	NA	0.0157014	NA	NA	NA	0.0461817	NA	NA
on.gene.LG12.471	0.01853	NA	0.0141409	NA	NA	NA	NA	NA	0.0102404	NA	0.0326213	0.000190331	NA	0.000130988	NA
on.gene.LG12.481	0.00360983	NA	NA	0.0139881	0.00397647	NA	NA	0.0204691	0.0408484	NA	NA	NA	NA	NA	0.00198003
on.gene.LG12.497	0.00204112	0.000641372	0.0099091	NA	0.00186677	NA	NA	NA	NA	0.00299946	NA	0.000704212	NA	NA	NA
on.gene.LG12.524	0.00204191	0.0453026	NA	NA	0.00057899	NA	NA	NA	0.00224814	0.0291717	NA	0.000385745	NA	NA	NA
on.gene.LG12.544	0.00362941	NA	NA	NA	NA	NA	0.0231723	0.0171809	0.00178323	NA	NA	NA	0.000266665	NA	0.000155662
on.gene.LG12.582	0.0086345	NA	NA	0.0444832	NA	0.0284913	NA	NA	NA	0.00270053	NA	0.0474408	NA	0.0102701	NA
on.gene.LG12.620	0.000214616	NA	NA	0.00644756	0.0026204	NA	NA	0.0491903	NA	0.0395816	NA	NA	0.00711681	NA	NA
on.gene.LG12.646	0.0385452	NA	NA	0.00869138	0.0119199	NA	NA	0.049909	NA	0.016893	NA	NA	0.000491847	NA	NA
on.gene.LG12.707	0.0145616	NA	NA	0.0235304	0.0489532	0.00676012	NA	0.0254709	NA	0.00236723	NA	NA	NA	NA	NA
on.gene.LG12.724	0.000269686	0.0336791	NA	NA	0.000198341	0.017346	NA	NA	NA	NA	NA	NA	0.000418999	NA	0.0224176
on.gene.LG12.756	0.0376125	NA	NA	NA	NA	0.00415989	NA	0.000229191	0.000444817	NA	0.0024747	NA	NA	NA	0.0386632
on.gene.LG12.841	0.0294636	0.0311165	0.0352478	NA	0.0224085	NA	NA	NA	NA	0.00725217	NA	0.00618422	NA	NA	NA
on.gene.LG12.844	0.00212387	0.0379891	NA	NA	0.000473552	0.0288479	NA	NA	0.0292414	NA	NA	NA	NA	0.00159088	NA
on.gene.LG12.867	0.00646889	NA	NA	0.0200915	0.00782011	NA	NA	0.00129754	0.000858782	NA	NA	NA	NA	NA	0.00301709
on.gene.LG12.874	0.00528575	NA	NA	NA	NA	NA	NA	0.00801445	0.0391488	NA	0.0112286	0.0204055	NA	NA	0.0174499
on.gene.LG12.93	0.00270718	NA	NA	0.000250586	NA	NA	NA	NA	0.000411226	NA	0.00742855	0.000433516	NA	NA	0.00542262
on.gene.LG13.104	0.000190837	NA	NA	0.0336335	0.0296135	NA	NA	NA	0.00177375	0.000271983	NA	NA	NA	0.0400447	NA
on.gene.LG13.199	0.0296333	NA	NA	NA	0.000419202	0.00012673	NA	0.0114099	NA	NA	0.0307485	NA	0.011823	NA	NA
on.gene.LG13.232	0.000791814	NA	NA	NA	0.000739379	NA	NA	0.00564779	0.00226241	NA	0.0298324	NA	NA	NA	0.000180019
on.gene.LG13.277	0.0420812	0.00970192	NA	0.0197628	NA	0.0126175	NA	NA	NA	0.0215165	NA	0.0028715	NA	NA	NA
on.gene.LG13.334	0.00274062	NA	NA	0.00031855	0.00506992	NA	NA	0.0281017	NA	NA	0.0454532	NA	NA	NA	0.00835153
on.gene.LG13.410	0.000587902	0.00224419	NA	0.011106	NA	NA	0.0375698	NA	0.0301144	NA	NA	NA	0.00365753	NA	NA
on.gene.LG13.428	0.0495334	NA	NA	0.00176959	NA	0.000902535	NA	0.00243722	NA	0.0265078	NA	NA	NA	NA	0.000235044
on.gene.LG13.43	0.0254179	NA	NA	0.000105706	0.000737871	NA	NA	NA	0.0481448	NA	NA	0.000105307	NA	NA	0.00808779
on.gene.LG13.464	0.00267868	0.0131989	NA	0.00182518	NA	0.00194633	NA	NA	NA	0.00180051	NA	0.00940866	NA	NA	NA
on.gene.LG13.493	0.0102419	0.0285524	NA	NA	0.00169888	NA	NA	NA	NA	NA	0.0450346	NA	0.0206147	0.00499356	NA
on.gene.LG13.522	0.00549411	NA	NA	0.000151048	0.000137595	NA	NA	0.00563155	NA	NA	0.0167211	0.0221257	NA	NA	NA
on.gene.LG13.539	0.023842	0.00120275	NA	NA	0.00768122	NA	0.0333427	NA	NA	NA	0.00940987	NA	NA	NA	0.00359922
on.gene.LG13.545	0.000657671	NA	NA	0.000400547	NA	NA	NA	0.0001178	0.00082796	NA	NA	0.0280794	NA	NA	0.00235702
on.gene.LG13.572	0.000125999	NA	NA	NA	0.0353291	0.00218696	0.00139263	NA	NA	NA	0.00497749	NA	NA	NA	0.0158269
on.gene.LG13.618	0.0248066	0.0364194	NA	NA	NA	NA	NA	NA	NA	0.00603582	NA	0.00821727	0.00427514	NA	0.0146056
on.gene.LG13.6440001	0.0141997	0.0120144	NA	NA	0.0100069	0.00590588	0.00258552	NA	NA	NA	0.0437882	NA	NA	NA	NA
on.gene.LG13.668	0.0181034	NA	NA	0.000605508	NA	0.00735061	NA	NA	NA	0.000110287	NA	NA	0.00691214	NA	0.000736037
on.gene.LG13.674	0.0227714	0.0226419	NA	NA	NA	NA	0.0015202	NA	0.0161349	0.00456358	NA	0.000522524	NA	NA	NA
on.gene.LG13.683	0.0398629	0.026841	NA	0.033195	NA	0.0471642	NA	NA	NA	0.041883	NA	0.0245027	NA	NA	NA
on.gene.LG13.739	0.0010478	NA	NA	NA	NA	NA	0.00199226	0.00805553	NA	NA	0.00263549	0.00294601	0.0323444	NA	NA
on.gene.LG13.758	0.000101064	NA	0.0019872	NA	NA	0.00792551	NA	NA	0.0207253	NA	0.000542395	NA	NA	NA	0.0260863
on.gene.LG13.76	0.00500705	NA	NA	NA	NA	NA	NA	0.0024485	0.0044836	NA	0.0050043	0.00230543	NA	NA	0.00607953
on.gene.LG13.780	0.0405945	NA	NA	0.0470046	NA	0.0155508	NA	NA	NA	0.00948405	NA	NA	0.00614385	NA	0.0246122
on.gene.LG13.794	0.0474532	NA	0.00889141	NA	NA	0.00249046	NA	NA	NA	NA	0.0191298	NA	0.00499003	0.0165439	NA
on.gene.LG13.8150001	0.00239256	NA	NA	0.0240645	NA	0.0321277	NA	0.00553815	NA	0.0020893	NA	NA	NA	0.0174652	NA
on.gene.LG13.828	0.00046756	0.00785692	NA	0.00973172	NA	0.00257529	NA	NA	NA	NA	NA	0.000864989	0.0260859	NA	NA
on.gene.LG13.869	0.00114991	NA	0.0016809	NA	NA	0.00225413	0.00162275	NA	NA	NA	0.00169108	NA	NA	NA	0.00102335
on.gene.LG14.115	0.00500705	NA	NA	0.00564299	0.000100158	NA	NA	NA	0.00173791	NA	0.005786	NA	NA	NA	0.0393798
on.gene.LG14.138	0.0141321	NA	NA	NA	NA	NA	NA	0.00368864	NA	NA	0.00625565	0.00150879	0.0158331	0.0382691	NA
on.gene.LG14.2	0.0122555	0.000930847	NA	NA	0.00367893	0.0265606	NA	NA	0.0294579	NA	0.0051971	NA	NA	NA	NA
on.gene.LG14.2230001	0.0186963	NA	0.0151412	NA	NA	NA	0.00286119	NA	NA	0.000352778	NA	0.0287731	NA	NA	0.00389353
on.gene.LG14.272	0.00646889	0.0473404	0.00659401	NA	0.0338377	NA	NA	NA	0.0294134	NA	NA	NA	NA	0.00403323	NA
on.gene.LG14.275	0.000186034	0.0205769	NA	NA	NA	0.000553302	0.00344572	NA	NA	0.00118454	NA	NA	NA	0.00806528	NA
on.gene.LG14.460	0.00270684	NA	NA	0.00013005	0.037302	NA	0.0194604	0.00297113	NA	0.000441485	NA	NA	NA	NA	NA
on.gene.LG14.4650001	0.00524422	NA	NA	NA	0.00431486	NA	NA	NA	0.00103952	NA	0.0450671	0.000973361	NA	NA	0.0366847
on.gene.LG14.491	0.0314498	NA	NA	0.0493808	0.0326408	NA	NA	0.0450012	0.0189212	NA	0.0137899	NA	NA	NA	NA
on.gene.LG14.50	0.0306317	0.0482903	NA	0.0162464	NA	NA	0.0333202	NA	0.0248153	NA	NA	0.00050163	NA	NA	NA
on.gene.LG14.557	0.00469404	NA	NA	NA	NA	NA	NA	0.00851474	0.0037626	NA	0.00543204	0.0111149	NA	NA	0.00145907
on.gene.LG14.575	0.0493151	NA	NA	NA	0.044914	NA	NA	0.00759748	0.0444855	NA	0.0118316	0.00126918	NA	NA	NA
on.gene.LG14.608	0.0055741	NA	NA	NA	NA	NA	NA	0.00580806	0.0107387	0.0244807	NA	NA	0.0340423	NA	0.00679193
on.gene.LG14.644	0.00958694	NA	0.000109053	NA	0.00155287	NA	0.0161832	NA	NA	NA	NA	0.00945511	NA	NA	0.000152795
on.gene.LG14.657	0.00368067	NA	0.0252156	NA	NA	0.000165988	0.00338118	0.00346628	NA	NA	NA	NA	NA	NA	0.0333305
on.gene.LG14.669	0.000749909	NA	NA	NA	NA	NA	NA	0.0101332	0.0300743	NA	0.000804346	0.0115301	NA	NA	0.00189888
on.gene.LG14.6800001	0.0247072	NA	NA	0.00538411	0.00249603	NA	NA	0.0117411	NA	NA	0.0368602	0.0212531	NA	NA	NA
on.gene.LG14.703	0.0206332	NA	NA	NA	0.0353073	0.0456275	NA	0.00057288	NA	NA	0.000213732	NA	NA	NA	0.00108943
on.gene.LG14.747	0.0249409	NA	NA	0.0190942	0.00174633	NA	NA	0.0018942	0.0177232	NA	NA	0.046415	NA	NA	NA
on.gene.LG14.864	0.0352444	0.000938926	0.00824156	NA	0.028516	NA	NA	NA	NA	NA	0.00122654	NA	NA	NA	0.000183503
on.gene.LG15.119	0.000140895	NA	NA	0.00139365	0.0489485	NA	NA	0.00711844	NA	NA	0.00198195	NA	NA	NA	0.0181828
on.gene.LG15.166	0.0140209	NA	0.0432898	NA	NA	NA	NA	0.000642257	0.00135005	NA	0.000153985	NA	NA	NA	0.0149993
on.gene.LG15.198	0.0306317	NA	NA	0.00210247	0.000339879	NA	0.0221529	0.00824439	NA	NA	NA	0.039369	NA	NA	NA
on.gene.LG15.217	0.00909615	NA	NA	0.00748034	0.0330643	NA	NA	0.0220354	NA	NA	0.00110319	NA	NA	NA	0.00430104
on.gene.LG15.273	0.00448636	0.00244548	NA	NA	NA	NA	NA	NA	NA	0.00380207	NA	0.00150273	0.0421889	NA	0.0379161
on.gene.LG15.394	0.00170373	NA	NA	NA	NA	NA	NA	0.000331976	0.0168514	NA	0.00100114	0.000143825	NA	NA	0.0353961
on.gene.LG15.437	0.00174773	NA	NA	0.0101975	0.000507699	NA	NA	0.00450592	0.000144342	NA	NA	NA	NA	NA	0.0320145
on.gene.LG15.594	0.00369197	NA	NA	NA	NA	0.00358244	0.0145529	NA	0.0215177	NA	NA	0.00493973	NA	NA	0.000453585
on.gene.LG15.6710001	0.041738	NA	NA	NA	NA	0.0338376	NA	0.00399858	0.000459079	NA	0.0020216	NA	NA	NA	0.00635903
on.gene.LG15.92	0.000320922	NA	NA	NA	NA	NA	NA	0.000210015	0.00700399	NA	0.0316056	0.0441482	NA	NA	0.00473679
on.gene.LG16-21.212	0.000178501	NA	NA	0.0164241	0.0417039	NA	NA	0.000287671	NA	NA	0.000198207	0.00038384	NA	NA	NA
on.gene.LG16-21.216	0.034379	NA	NA	0.000553674	NA	0.0073854	NA	0.00643476	NA	NA	NA	NA	0.00521183	NA	0.0004485
on.gene.LG16-21.285	0.00165149	NA	0.00607126	NA	NA	NA	0.0256156	NA	NA	NA	NA	0.0335523	0.00086806	NA	0.00755531
on.gene.LG16-21.293	0.00947959	NA	NA	NA	0.000115689	NA	0.0180339	0.0424711	NA	NA	0.000531265	0.00343022	NA	NA	NA
on.gene.LG16-21.348	0.0112012	NA	NA	NA	NA	NA	NA	0.0147195	0.0112364	NA	0.0013226	0.00159293	NA	NA	0.00616435
on.gene.LG16-21.372	0.000964949	NA	0.00306727	NA	0.0396576	NA	NA	NA	0.000605925	0.0005336	NA	0.0148464	NA	NA	NA
on.gene.LG16-21.381	0.00569383	NA	NA	0.00545836	0.0266438	NA	NA	0.023484	NA	NA	0.0099276	0.0427688	NA	NA	NA
on.gene.LG16-21.4540002	0.00441435	NA	0.0367471	NA	NA	NA	NA	0.000373893	0.0232069	NA	0.00906264	0.00132873	NA	NA	NA
on.gene.LG16-21.476	0.00192243	NA	NA	0.00935843	0.00450213	NA	NA	0.000496328	NA	NA	0.00324476	0.00105471	NA	NA	NA
on.gene.LG16-21.559	0.00165023	NA	NA	0.0049164	0.0390911	NA	NA	0.0124818	NA	NA	0.011365	NA	NA	NA	0.0192058
on.gene.LG16-21.721	0.00447361	0.000525	0.000539482	NA	NA	NA	NA	NA	0.000704017	NA	NA	0.039658	NA	0.00788371	NA
on.gene.LG16-21.734	0.0209234	NA	NA	NA	NA	NA	NA	0.0101347	NA	NA	0.0192697	0.00905083	0.0136763	0.0187257	NA
on.gene.LG17.195	0.0314498	NA	0.00994763	NA	0.0320312	NA	NA	NA	0.0458769	NA	NA	0.00125226	NA	NA	0.000534738
on.gene.LG17.210	0.00445826	NA	NA	NA	NA	NA	NA	0.0252354	0.0125942	NA	0.00748097	0.00373604	NA	NA	0.0112951
on.gene.LG17.286	0.0122996	NA	NA	0.0370779	0.000766059	NA	NA	NA	0.000594271	NA	0.000360286	NA	NA	NA	0.0281065
on.gene.LG17.3	0.0316946	NA	NA	NA	NA	0.0303681	0.000342244	0.0280954	NA	NA	0.0364743	0.0133483	NA	NA	NA
on.gene.LG17.400	0.0272334	0.000683477	NA	0.00467497	NA	0.00800572	0.015365	NA	NA	0.0334874	NA	NA	NA	NA	NA
on.gene.LG17.402	0.0365521	0.000332067	0.0415614	NA	0.000148515	NA	NA	NA	0.00622166	NA	NA	0.0363157	NA	NA	NA
on.gene.LG17.469	0.00186608	NA	NA	NA	0.000357952	NA	NA	0.00672437	0.0181734	NA	NA	0.000120561	NA	NA	0.00366245
on.gene.LG17.487	0.0327903	NA	NA	NA	0.0388394	NA	NA	0.00489816	NA	NA	0.00139491	0.000100806	0.0164562	NA	NA
on.gene.LG17.525	0.00380957	NA	NA	0.0277777	0.00459881	NA	NA	0.000221942	NA	0.0145944	NA	NA	NA	0.0148905	NA
on.gene.LG17.572	0.042356	NA	NA	0.00365805	NA	NA	NA	0.00186691	0.0318166	NA	0.0122867	0.000267617	NA	NA	NA
on.gene.LG17.594	0.000988989	0.0348187	NA	0.0125308	NA	NA	0.0192031	NA	0.000542419	NA	0.000703492	NA	NA	NA	NA
on.gene.LG17.61	0.0001567	0.000205163	NA	NA	0.0193063	0.000134364	0.000162649	NA	NA	NA	0.0317615	NA	NA	NA	NA
on.gene.LG17.725	0.0373343	NA	NA	0.0429475	NA	NA	NA	NA	0.0336643	NA	0.000847593	0.00181131	NA	NA	0.0129297
on.gene.LG17.93	0.0254124	NA	NA	NA	0.000371567	NA	NA	NA	NA	NA	0.00635403	0.0119068	0.00529796	0.0480163	NA
on.gene.LG18.175	0.000859603	0.000158002	0.0344673	NA	0.00649877	NA	NA	NA	NA	NA	NA	0.0170751	NA	NA	0.0195575
on.gene.LG18.435	0.0133448	NA	NA	0.00274265	NA	0.000861618	NA	NA	0.00549299	0.00332923	NA	NA	0.0468894	NA	NA
on.gene.LG18.458	0.0376568	NA	NA	NA	NA	0.027046	NA	0.00249694	0.01219	NA	0.0108533	0.000398711	NA	NA	NA
on.gene.LG18.515	0.000220596	0.00758104	NA	0.00434277	NA	0.00149785	NA	NA	NA	NA	NA	0.00138996	NA	0.00483122	NA
on.gene.LG18.541	0.00012617	NA	NA	NA	NA	0.0176057	NA	NA	0.0208067	0.0193461	NA	0.000284015	NA	0.00108785	NA
on.gene.LG18.556	0.0143602	NA	NA	0.0219169	0.049217	NA	NA	0.0284298	NA	NA	0.00535804	0.012416	NA	NA	NA
on.gene.LG18.571	0.00170672	NA	NA	NA	0.0417515	NA	NA	0.000104784	0.00115723	NA	NA	0.0366703	NA	NA	0.00618677
on.gene.LG18.573	0.000462872	NA	NA	NA	NA	0.00377882	NA	0.00477929	0.0182315	NA	0.016313	NA	NA	NA	0.0014461
on.gene.LG18.623	0.0206332	NA	NA	NA	NA	NA	NA	0.00390336	0.00313637	0.010124	NA	NA	0.00740567	NA	0.0128943
on.gene.LG18.67	0.0179687	0.031412	0.0456295	NA	NA	0.0345124	NA	NA	0.000794702	NA	NA	NA	NA	0.000475652	NA
on.gene.LG18.754	0.00240323	NA	NA	0.00125781	NA	NA	NA	NA	0.0275554	NA	0.0241458	0.00381662	NA	NA	0.00967897
on.gene.LG18.763	0.0254519	0.000586622	NA	NA	NA	NA	NA	NA	0.000473227	0.00148	NA	0.00214374	NA	0.0160227	NA
on.gene.LG18.88	0.042356	NA	NA	NA	NA	0.0268025	NA	0.00608687	0.00201285	NA	0.00510305	0.0186018	NA	NA	NA
on.gene.LG19.12	0.00757286	NA	NA	0.00972638	0.0480904	NA	0.0348052	0.0325584	NA	NA	NA	NA	NA	0.0238944	NA
on.gene.LG19.164	0.0468362	NA	NA	0.0030454	NA	0.0364554	NA	0.00325137	0.000586207	NA	NA	NA	NA	NA	0.0102454
on.gene.LG19.207	0.000504071	NA	NA	0.0183873	NA	NA	NA	0.0171141	0.0415235	NA	NA	0.000460848	NA	NA	0.00114645
on.gene.LG19.210	0.000142084	NA	NA	NA	NA	NA	NA	0.000675185	0.010601	0.0183344	NA	NA	0.00278979	NA	0.00175661
on.gene.LG19.2370001	0.0497657	NA	0.000976773	NA	NA	NA	NA	0.0456886	0.0339506	NA	0.00354259	0.00278811	NA	NA	NA
on.gene.LG19.286	0.0166243	NA	0.0257471	NA	NA	NA	0.0271947	NA	NA	NA	0.000540281	0.00538719	NA	NA	0.0157462
on.gene.LG19.312	0.0321259	NA	NA	0.0154066	0.0497589	NA	NA	NA	NA	NA	0.00187909	0.00623746	NA	NA	0.0331308
on.gene.LG19.356	0.0195358	0.000592453	NA	0.000346988	NA	NA	NA	NA	0.0045255	NA	NA	NA	0.0136511	0.00342518	NA
on.gene.LG19.360	0.0125839	NA	NA	NA	0.000246502	NA	NA	NA	0.0378003	NA	0.000360464	0.00361424	NA	NA	0.00430116
on.gene.LG19.374	0.00109329	0.000398228	NA	NA	0.0497439	0.000668292	NA	NA	0.00332262	NA	NA	NA	0.0151786	NA	NA
on.gene.LG19.377	0.000169066	0.000636193	NA	0.00650749	NA	0.0440167	NA	NA	NA	0.00119658	NA	0.00352971	NA	NA	NA
on.gene.LG19.387	0.0136103	NA	NA	0.0134181	0.02573	NA	0.00684743	0.0219874	NA	NA	NA	NA	NA	0.00558456	NA
on.gene.LG19.434	0.0338907	NA	NA	0.0151645	NA	NA	NA	0.0225838	NA	NA	NA	0.00261327	0.00435429	0.0346378	NA
on.gene.LG19.5070002	0.0413936	NA	NA	0.0133989	0.00256141	NA	NA	0.00894177	NA	NA	0.000783454	NA	NA	NA	0.000366607
on.gene.LG19.682	0.0203776	NA	NA	0.0225692	0.0157408	NA	NA	0.0112149	NA	NA	0.0093709	0.00487636	NA	NA	NA
on.gene.LG19.735	0.0127861	NA	NA	0.000103837	NA	NA	NA	0.00314387	0.000673058	NA	0.00032819	NA	NA	NA	0.00254068
on.gene.LG19.769	0.000439857	NA	NA	0.000397631	NA	0.0296203	NA	NA	0.00683018	0.0215196	NA	NA	NA	NA	0.0217711
on.gene.LG19.78	0.000786745	NA	NA	NA	0.0156356	NA	NA	NA	NA	NA	0.0027819	0.000124584	0.0133564	0.00480272	NA
on.gene.LG19.87	0.0298612	0.0018168	NA	0.0225692	NA	0.000789365	NA	NA	NA	0.00070889	NA	NA	0.0244244	NA	NA
on.gene.LG19.88	0.0165101	0.00156022	NA	0.00095901	NA	0.000578115	NA	NA	NA	NA	NA	NA	0.000605166	NA	0.00103784
on.gene.LG2.102	0.0188457	0.00359558	NA	0.00462649	NA	0.00529753	NA	NA	NA	0.0159307	NA	0.00206568	NA	NA	NA
on.gene.LG2.11	0.0398629	NA	NA	0.000541207	0.00586372	0.002652	NA	NA	NA	NA	NA	NA	0.0216312	NA	0.00639236
on.gene.LG2.224	0.00846634	NA	NA	0.00902564	NA	0.0323814	NA	NA	NA	0.0219182	NA	NA	0.014939	NA	0.00459668
on.gene.LG2.254	0.000333567	NA	0.0229251	NA	NA	NA	0.0205814	0.00410342	0.00893981	NA	NA	NA	NA	NA	0.000557572
on.gene.LG2.272	0.000289748	0.0214693	NA	0.0185097	NA	NA	NA	NA	NA	0.00571804	NA	NA	0.0205694	NA	0.00111097
on.gene.LG2.274	0.00727125	NA	NA	NA	NA	0.0170441	NA	0.0175576	NA	NA	0.000195496	0.000443679	0.0310411	NA	NA
on.gene.LG2.276	0.00943325	0.000464523	NA	0.000159889	NA	0.00451229	NA	NA	NA	NA	NA	0.00655543	NA	NA	0.0132479
on.gene.LG2.29	0.0477053	NA	NA	0.00326784	NA	NA	NA	0.000278626	0.0362806	NA	0.000199225	NA	0.0120321	NA	NA
on.gene.LG2.311	0.000296524	0.0421083	0.016721	NA	NA	0.0415914	NA	NA	NA	NA	NA	0.000207995	0.00130578	NA	NA
on.gene.LG2.354	0.0107557	0.0475954	NA	NA	NA	NA	NA	NA	NA	0.00132896	NA	0.00755573	0.00505319	NA	0.0234674
on.gene.LG2.524	0.0344552	NA	NA	0.000214591	0.0131539	0.000159292	0.0140436	NA	NA	0.0241924	NA	NA	NA	NA	NA
on.gene.LG2.609	0.00240323	0.00100657	NA	0.00519458	NA	0.0263214	NA	NA	NA	0.00903988	NA	0.00351469	NA	NA	NA
on.gene.LG2.83	0.000653163	0.0467354	NA	0.00645757	NA	NA	NA	NA	0.00135005	NA	0.0211071	NA	NA	0.0285134	NA
on.gene.LG20.186	0.0125356	0.00359236	NA	NA	0.0003082	NA	NA	NA	NA	0.000922128	NA	0.00786722	0.0285926	NA	NA
on.gene.LG20.207	0.0280437	NA	0.0191345	NA	NA	0.0248245	NA	0.00124504	NA	NA	0.0406964	0.00210113	NA	NA	NA
on.gene.LG20.208	0.00350397	NA	NA	0.0105984	NA	NA	0.00966367	NA	0.0458726	0.0168487	NA	NA	NA	0.00255844	NA
on.gene.LG20.218	0.00013582	0.00264326	NA	NA	0.0388155	0.000163305	NA	NA	NA	0.00724571	NA	NA	0.00231747	NA	NA
on.gene.LG20.271	0.0169612	NA	NA	0.000782823	NA	0.0208714	0.0099146	0.00192437	NA	0.000888779	NA	NA	NA	NA	NA
on.gene.LG20.311	0.00162907	NA	NA	NA	NA	0.0458965	NA	0.000339705	NA	NA	0.00463313	0.00143341	NA	0.0303377	NA
on.gene.LG20.358	0.0432329	NA	NA	NA	NA	0.026677	0.00846204	0.0225651	NA	0.000157754	NA	NA	NA	NA	0.000115788
on.gene.LG20.362	0.0103399	NA	NA	NA	0.00016816	NA	0.000819546	NA	NA	0.000141367	NA	0.00259989	0.00800066	NA	NA
on.gene.LG20.37	0.0361732	NA	NA	0.00523374	0.0165402	NA	NA	0.0015266	0.0323928	NA	NA	NA	NA	NA	0.00373321
on.gene.LG20.448	0.0012329	0.0435683	0.0097578	NA	NA	NA	NA	NA	0.0200678	0.00278389	NA	NA	NA	0.000475927	NA
on.gene.LG20.460001	0.00123264	NA	NA	0.003299	NA	NA	0.00776538	NA	NA	NA	0.0237967	NA	0.000216628	0.0186007	NA
on.gene.LG20.467	0.0467804	NA	NA	NA	0.00313779	NA	NA	0.0357356	NA	0.000166845	NA	NA	0.00512478	NA	0.00501899
on.gene.LG20.568	0.000805056	NA	NA	0.0031205	0.0130634	NA	NA	0.00270601	0.00237613	NA	NA	NA	NA	NA	0.000469387
on.gene.LG20.574	0.000316963	0.00829715	0.0443662	NA	NA	NA	0.00994924	NA	NA	0.0372087	NA	NA	0.00985511	NA	NA
on.gene.LG20.632	0.0318587	NA	NA	NA	0.00474053	NA	NA	0.00087977	NA	NA	0.0476281	0.000935998	NA	NA	0.00343174
on.gene.LG20.646	0.0116044	NA	NA	0.0012777	NA	NA	NA	0.000507862	0.00562242	NA	NA	0.0227163	NA	NA	0.0457905
on.gene.LG20.75	0.0173563	NA	NA	NA	NA	NA	NA	0.0243497	NA	NA	0.0416685	0.00206486	0.00102851	0.0156034	NA
on.gene.LG20.777	0.0164437	NA	NA	NA	NA	NA	0.0254025	0.000563098	NA	NA	0.00990439	0.000197815	NA	NA	0.0016232
on.gene.LG20.87	0.0370472	NA	NA	0.0141013	0.0135978	0.00304714	NA	0.00363565	NA	0.00681142	NA	NA	NA	NA	NA
on.gene.LG20.870	0.00398223	NA	NA	NA	NA	0.000793835	NA	0.000742566	0.00015663	NA	NA	0.0238876	NA	NA	0.000742282
on.gene.LG20.947	0.00268005	NA	NA	0.0312804	0.0297191	NA	NA	0.00126765	0.000345734	NA	NA	NA	NA	NA	0.00056134
on.gene.LG22.136	0.0161489	0.0227723	NA	NA	0.00110117	NA	NA	NA	0.000472881	0.00653873	NA	0.015417	NA	NA	NA
on.gene.LG22.162	0.00751234	NA	NA	0.00393578	0.00279035	NA	NA	0.00457654	NA	NA	0.0234094	0.0197196	NA	NA	NA
on.gene.LG22.211	0.00424431	NA	NA	0.0390002	0.000765966	NA	NA	NA	NA	NA	0.000131667	NA	0.000819449	0.0194912	NA
on.gene.LG22.218	0.00309095	NA	NA	0.0363836	0.0295502	NA	NA	0.00111085	NA	NA	0.00115138	0.000423701	NA	NA	NA
on.gene.LG22.262	0.00368067	0.000162543	NA	0.0073778	NA	NA	NA	NA	NA	NA	NA	0.0142918	0.013656	NA	0.000112942
on.gene.LG22.281	0.000183033	NA	NA	0.000844286	0.00510077	NA	NA	0.00108597	0.00101739	NA	NA	0.000139022	NA	NA	NA
on.gene.LG22.331	0.0053893	NA	NA	NA	0.000284567	0.00864406	NA	0.022555	0.000338047	NA	NA	NA	0.00715891	NA	NA
on.gene.LG22.404	0.00646889	0.00111369	NA	0.0120539	NA	0.0450457	NA	NA	NA	0.0185066	NA	0.00285453	NA	NA	NA
on.gene.LG22.503	0.0108889	NA	NA	0.000752553	0.00106621	NA	NA	0.0147559	0.00377929	NA	NA	NA	NA	NA	0.00211107
on.gene.LG22.528	0.000194416	NA	0.0177835	NA	NA	NA	NA	0.0120822	NA	NA	0.000953705	0.0485867	NA	NA	0.00102992
on.gene.LG22.5490002	0.000251662	NA	NA	0.00366991	0.00112801	NA	NA	NA	0.041553	NA	0.011143	0.00311112	NA	NA	NA
on.gene.LG22.557	0.0257618	NA	NA	NA	0.000143087	0.0297648	NA	0.0335391	NA	NA	0.000524723	NA	NA	NA	0.0104094
on.gene.LG22.590	0.0131094	NA	NA	0.0112662	0.00329424	NA	NA	0.00323434	0.00911991	NA	NA	NA	NA	NA	0.0225258
on.gene.LG22.602	0.0496023	NA	NA	NA	0.0339886	NA	NA	0.0198258	NA	NA	0.000955498	0.000135482	0.0292189	NA	NA
on.gene.LG22.622	0.0447558	NA	NA	0.00091769	NA	0.00667015	NA	0.000959534	0.000747544	NA	NA	NA	NA	NA	0.0253832
on.gene.LG22.6280001	0.00338138	NA	NA	0.0285811	NA	NA	NA	NA	NA	0.0496055	NA	0.00160393	0.0248207	NA	0.00112948
on.gene.LG22.680001	0.0122414	NA	0.0301118	NA	NA	NA	0.000661124	NA	NA	NA	NA	0.00271088	0.04425	NA	0.000207024
on.gene.LG23.10	0.0075679	NA	NA	0.000388465	NA	NA	0.0265754	0.00141202	NA	NA	0.0149227	0.00395126	NA	NA	NA
on.gene.LG23.109	0.000133049	0.000216043	NA	NA	NA	0.0288355	0.0092912	NA	NA	NA	0.0026795	NA	NA	NA	0.0243836
on.gene.LG23.20	0.00818244	NA	NA	NA	0.000158615	NA	0.0193853	0.00595282	NA	NA	0.00034643	0.0310263	NA	NA	NA
on.gene.LG23.271	0.000189858	NA	NA	0.0156352	0.00645734	NA	NA	NA	0.0093705	0.00420688	NA	NA	NA	NA	0.0186991
on.gene.LG23.296	0.00138979	NA	NA	0.0271315	NA	NA	NA	0.00553624	NA	NA	0.000318677	0.00155754	NA	NA	0.0277067
on.gene.LG23.340	0.00136048	0.0067633	NA	NA	NA	NA	NA	NA	NA	0.00909421	NA	0.0370664	0.00457817	NA	0.000478027
on.gene.LG23.345	0.0414965	NA	NA	NA	NA	0.0106836	0.0226701	0.0119769	0.00147946	NA	NA	0.000373146	NA	NA	NA
on.gene.LG23.441	0.00219018	NA	NA	NA	NA	0.00684682	0.0162651	NA	NA	NA	0.0142937	0.0394279	NA	NA	0.0199983
on.gene.LG23.443	0.0120925	NA	NA	NA	NA	0.000581039	0.0173207	NA	0.0237793	NA	NA	0.000682138	NA	NA	0.0386708
on.gene.LG23.492	0.00560255	NA	NA	0.000270935	0.00136111	NA	NA	0.0185369	0.00766918	NA	NA	NA	NA	NA	0.00147542
on.gene.LG23.498	0.0460436	NA	NA	0.0363592	0.000605047	NA	NA	0.000613168	0.0247549	NA	0.00636176	NA	NA	NA	NA
on.gene.LG23.56	0.00907523	NA	NA	0.0230466	NA	NA	0.0498731	NA	0.00242471	NA	0.0201565	NA	0.0296403	NA	NA
on.gene.LG23.66	0.00109811	NA	NA	NA	NA	0.0127148	0.000342244	NA	0.041941	NA	0.0240715	0.000593368	NA	NA	NA
on.gene.LG3.105	0.00476821	0.0173593	NA	0.0244936	NA	NA	NA	NA	NA	0.0496055	NA	NA	0.0408472	NA	0.00303575
on.gene.LG3.13	0.0062619	NA	NA	NA	NA	NA	NA	0.00828451	0.0324482	NA	0.00100618	0.00126935	NA	NA	0.0161505
on.gene.LG3.182	0.00418091	0.0167705	NA	0.00010881	NA	0.0351498	NA	NA	0.00771565	NA	NA	NA	0.000653064	NA	NA
on.gene.LG3.203	0.00057483	NA	NA	0.0116991	NA	NA	NA	0.00378243	0.0181246	NA	0.013412	NA	NA	NA	0.00213691
on.gene.LG3.205	0.016783	NA	NA	0.0125735	0.0168519	NA	NA	0.0111551	NA	NA	NA	0.000124519	0.00820421	NA	NA
on.gene.LG3.276	0.00342692	NA	NA	NA	NA	0.00501342	0.00986369	0.0424347	0.00928235	NA	NA	0.000242817	NA	NA	NA
on.gene.LG3.285	0.00239015	NA	NA	NA	NA	NA	NA	0.000156561	0.00740746	NA	0.0294911	0.00613649	NA	NA	0.02719
on.gene.LG3.369	0.0127005	0.0219797	NA	NA	NA	NA	NA	NA	0.00267032	0.00665327	NA	0.00999463	NA	0.00177404	NA
on.gene.LG3.401	0.049139	0.00801438	NA	0.00931357	NA	0.00873118	NA	NA	NA	0.03484	NA	0.00418577	NA	NA	NA
on.gene.LG3.54	0.0275475	NA	NA	0.0261793	0.000676552	NA	NA	0.000479909	0.00992772	NA	0.000685762	NA	NA	NA	NA
on.gene.LG3.790001	0.000609958	NA	NA	0.0215241	0.00037375	NA	NA	0.0281528	0.000371659	NA	NA	NA	NA	NA	0.0298276
on.gene.LG3.91	0.00212387	NA	NA	0.00507873	0.0275535	NA	NA	0.0111935	NA	NA	0.00561009	0.0269319	NA	NA	NA
on.gene.LG4.138	0.00340874	0.0452574	NA	0.0119486	NA	0.0270197	NA	NA	NA	0.00520821	NA	NA	NA	NA	0.0273193
on.gene.LG4.176	0.00395218	NA	NA	0.00698102	0.000624516	NA	NA	0.000954623	NA	NA	0.000262611	0.00868257	NA	NA	NA
on.gene.LG4.185	0.0497328	0.0011071	NA	NA	0.0203423	NA	NA	NA	0.00171971	0.0241647	NA	0.000293265	NA	NA	NA
on.gene.LG4.226	0.0100582	NA	NA	NA	NA	NA	NA	0.00033848	0.0195952	NA	0.000277865	0.00287865	NA	NA	0.000261163
on.gene.LG4.277	0.048607	NA	NA	0.0114248	0.00142603	NA	NA	0.00818562	NA	NA	0.00762641	0.000681712	NA	NA	NA
on.gene.LG4.293	0.00844815	0.00774595	NA	0.000425021	NA	NA	NA	NA	NA	0.000653672	NA	0.000429935	0.0229711	NA	NA
on.gene.LG4.389	0.00575275	NA	NA	0.000387624	NA	0.00484903	NA	NA	NA	0.0343878	NA	NA	0.0319566	NA	0.00437382
on.gene.LG4.428	0.0192817	NA	NA	NA	0.0320106	NA	NA	0.0453692	NA	0.00948405	NA	NA	0.00463516	NA	0.00634478
on.gene.LG4.4280002	0.00118609	NA	NA	NA	NA	NA	NA	0.0266459	0.00487729	0.000765735	NA	NA	0.00833575	NA	0.0080129
on.gene.LG4.511	0.000162326	NA	NA	0.000725075	NA	NA	0.000251048	NA	NA	NA	0.000284672	NA	0.000127525	0.00145997	NA
on.gene.LG4.549	0.0257618	NA	NA	0.00736381	NA	NA	0.0499779	NA	0.0262147	NA	0.00319518	NA	0.0193412	NA	NA
on.gene.LG4.636	0.00851131	0.0176632	NA	0.0133544	NA	NA	NA	NA	NA	0.0342291	NA	NA	0.0233803	NA	0.00437041
on.gene.LG4.648	0.00911325	NA	NA	NA	0.000313524	0.00112226	0.00961816	0.00669572	NA	0.0141628	NA	NA	NA	NA	NA
on.gene.LG4.655	0.000767652	0.0006684	NA	0.000118059	NA	NA	0.0140436	NA	0.0330104	NA	NA	NA	NA	0.040052	NA
on.gene.LG4.677	0.000111886	NA	0.0297979	NA	NA	NA	0.00115511	0.0265623	NA	NA	NA	0.0017422	NA	NA	0.00691815
on.gene.LG4.714	0.000258337	NA	0.0375538	NA	0.00161413	NA	NA	NA	0.0313409	NA	NA	0.000171952	NA	0.00262525	NA
on.gene.LG4.901	0.0145002	NA	NA	0.0330916	0.000170254	NA	NA	0.000589205	NA	NA	0.034876	NA	NA	0.0245487	NA
on.gene.LG4.920	0.000445718	NA	NA	0.00055724	NA	NA	NA	NA	0.00840685	NA	0.00475544	0.0233341	NA	NA	0.0295405
on.gene.LG5.1012	0.000847324	NA	NA	0.0120307	0.0132723	NA	NA	0.000723212	NA	0.0119682	NA	NA	0.00015549	NA	NA
on.gene.LG5.183	0.0207962	0.00285352	NA	0.00379099	NA	0.0424861	NA	NA	NA	NA	NA	0.0241618	NA	NA	0.0199687
on.gene.LG5.207	0.000124774	NA	NA	0.00144056	NA	NA	NA	NA	0.0172668	NA	0.0316804	0.000915651	NA	NA	0.00977802
on.gene.LG5.281	0.0297053	NA	NA	NA	NA	0.000935178	NA	0.0261521	NA	NA	0.000301003	0.000130042	0.0248487	NA	NA
on.gene.LG5.33	0.000324627	NA	NA	0.00895183	0.00488346	0.00132144	0.04571	NA	NA	NA	NA	NA	NA	0.00229446	NA
on.gene.LG5.353	0.0016126	0.0219965	0.00129659	NA	0.0123175	NA	NA	NA	NA	0.000180215	NA	0.00428328	NA	NA	NA
on.gene.LG5.368	0.0276854	NA	NA	0.000317967	0.0155038	0.000489453	NA	NA	NA	0.0351215	NA	NA	NA	0.00575256	NA
on.gene.LG5.38	0.0167309	0.00292303	NA	NA	NA	NA	0.00031127	NA	0.0367723	NA	NA	0.0115301	NA	0.0323418	NA
on.gene.LG5.403	0.00263043	0.000192104	0.0244241	NA	0.00148304	NA	NA	NA	NA	NA	0.0379906	NA	NA	NA	0.00956444
on.gene.LG5.436	0.00242798	NA	NA	0.00140523	0.000509416	0.00781958	NA	0.000743705	NA	0.00864012	NA	NA	NA	NA	NA
on.gene.LG5.471	0.0337987	NA	NA	0.00399522	0.00109946	NA	NA	0.0111131	0.00124649	NA	NA	NA	NA	NA	0.00375854
on.gene.LG5.476	0.00692179	NA	NA	0.0433626	0.0298594	0.0437274	NA	0.00331598	NA	0.00465348	NA	NA	NA	NA	NA
on.gene.LG5.536	0.00104547	NA	NA	0.0401105	NA	NA	NA	0.0430442	NA	0.00171423	NA	NA	0.0499405	NA	0.0250915
on.gene.LG5.59	0.0365341	NA	NA	NA	NA	NA	NA	0.0230298	NA	NA	0.0290086	0.0189264	0.00896406	0.0138966	NA
on.gene.LG5.637	0.0315402	NA	NA	0.000174935	0.000129285	0.0280077	0.00221751	0.0352198	NA	NA	NA	NA	NA	NA	NA
on.gene.LG5.671	0.0135291	NA	NA	NA	NA	NA	NA	0.0100081	NA	NA	0.00451854	0.00302475	0.00786394	0.0255434	NA
on.gene.LG5.688	0.00110112	NA	NA	0.0391669	0.0102333	NA	NA	NA	0.00475284	0.00422269	NA	NA	NA	NA	0.01954
on.gene.LG5.796	0.0130761	NA	NA	0.010924	0.00554071	NA	NA	0.00569405	0.0271389	NA	NA	NA	NA	NA	0.0392197
on.gene.LG5.836	0.00569695	NA	NA	0.00504615	0.00319773	NA	0.0477229	0.00276972	NA	NA	NA	NA	NA	0.0463961	NA
on.gene.LG5.884	0.000619523	NA	NA	0.00107566	NA	NA	NA	0.0465176	0.0170891	NA	0.00129672	NA	NA	NA	0.000101374
on.gene.LG5.919	0.0101721	NA	NA	NA	NA	0.0187886	0.0266298	0.0264975	NA	NA	0.0282855	NA	NA	NA	0.0434289
on.gene.LG5.99	0.00102878	NA	NA	0.000579989	0.0368345	NA	NA	0.0468654	NA	NA	0.00925428	NA	NA	NA	0.00448932
on.gene.LG5.997	0.00922776	NA	NA	0.000157963	NA	NA	NA	0.00776736	NA	NA	0.000242463	0.0394489	NA	NA	0.000109766
on.gene.LG5.999	0.00104207	NA	NA	NA	NA	NA	NA	0.000297524	0.00320631	NA	0.036213	0.0260705	NA	NA	0.00491092
on.gene.LG6.1059	0.000392094	NA	NA	0.00251479	0.00149011	NA	NA	0.000127457	NA	NA	0.00337266	0.00176262	NA	NA	NA
on.gene.LG6.123	0.00202834	NA	NA	0.00234375	0.000766126	NA	0.00171858	0.000516402	NA	NA	NA	NA	NA	0.00118784	NA
on.gene.LG6.235	0.0294119	NA	NA	0.0248084	NA	0.0334111	0.00795927	NA	NA	0.0279361	NA	NA	NA	0.00712092	NA
on.gene.LG6.324	0.000479606	NA	NA	0.000220207	NA	NA	0.0266062	NA	NA	NA	0.0156688	0.00264225	NA	0.0388022	NA
on.gene.LG6.375	0.0284528	NA	NA	0.0158062	0.0018627	NA	NA	0.000707349	0.00897989	NA	NA	NA	NA	NA	0.00623869
on.gene.LG6.408	0.00440949	0.0427786	NA	NA	NA	NA	NA	NA	NA	0.00315737	NA	0.0352018	0.0121773	NA	0.0119907
on.gene.LG6.443	0.00500975	NA	NA	NA	NA	NA	NA	0.0354197	NA	NA	0.00454673	0.0353162	0.0209461	0.0259741	NA
on.gene.LG6.497	0.00227926	0.00113514	NA	NA	NA	0.00468512	NA	NA	0.0247677	NA	NA	NA	0.0497511	0.0464182	NA
on.gene.LG6.502	0.0195689	0.00275108	NA	NA	NA	0.0450258	NA	NA	NA	0.00576368	NA	0.000378429	0.0263813	NA	NA
on.gene.LG6.531	0.00013582	0.00936892	NA	0.000100495	NA	NA	0.0085765	NA	NA	NA	0.00360852	NA	NA	0.00834474	NA
on.gene.LG6.618	0.0002668	0.0136012	0.0008329	NA	0.0223194	NA	0.00214067	NA	NA	NA	NA	NA	NA	NA	0.00266747
on.gene.LG6.739	0.0130254	NA	0.00186886	NA	NA	NA	NA	0.00691211	0.0181735	0.00405364	NA	NA	NA	NA	0.046468
on.gene.LG6.78	0.0333372	NA	NA	0.000650641	NA	0.00241603	NA	0.000397815	0.000826615	NA	NA	NA	NA	NA	0.0361823
on.gene.LG6.956	0.0112094	NA	NA	NA	NA	NA	NA	0.00369687	0.023192	NA	0.00662211	0.00215801	NA	NA	0.0420869
on.gene.LG6.994	0.0456518	NA	NA	0.00118073	NA	NA	NA	0.0045831	0.000114973	NA	NA	0.0136329	NA	NA	0.00224465
on.gene.LG7.1133	0.00452566	NA	NA	0.00644662	NA	0.0137449	NA	NA	NA	0.0066713	NA	NA	0.0175681	NA	0.00961627
on.gene.LG7.1138	0.00028782	NA	0.0197432	NA	NA	0.0109891	NA	0.000997501	NA	NA	0.000119781	0.000488509	NA	NA	NA
on.gene.LG7.1153	0.00271683	NA	NA	NA	0.000192534	NA	NA	0.0179209	0.00150709	NA	NA	0.000543754	NA	NA	0.000128844
on.gene.LG7.126	0.0409999	0.000740439	NA	0.00718075	NA	0.0110861	NA	NA	NA	0.0453643	NA	0.000549302	NA	NA	NA
on.gene.LG7.1285	0.000451329	0.0036682	0.000508446	NA	NA	NA	0.00133526	NA	NA	NA	0.00341588	NA	NA	NA	0.000234579
on.gene.LG7.1304	0.0020515	0.0181126	NA	NA	NA	NA	NA	NA	0.0436448	0.0025056	NA	0.020722	NA	0.00694134	NA
on.gene.LG7.1305	0.000160031	NA	NA	NA	NA	0.000155105	0.0138093	0.0167833	NA	NA	0.0398529	NA	NA	NA	0.0022921
on.gene.LG7.1407	0.00490991	0.000362038	NA	NA	0.00660878	NA	NA	NA	NA	NA	NA	0.0059306	0.0473478	NA	0.00320954
on.gene.LG7.155	0.0200425	0.00350322	NA	NA	NA	NA	NA	NA	NA	0.0315556	NA	0.00448403	0.00579627	NA	0.00293676
on.gene.LG7.165	0.00279981	NA	0.013137	NA	NA	0.00780444	0.0301722	NA	NA	NA	0.00335329	NA	NA	NA	0.00160931
on.gene.LG7.181	0.015307	0.0061068	NA	NA	NA	0.0089349	NA	NA	NA	0.00105853	NA	0.000174035	NA	NA	0.00088143
on.gene.LG7.183	0.0239733	NA	NA	NA	NA	NA	NA	0.00989436	0.000680163	NA	0.0466735	0.0235086	NA	NA	0.00179211
on.gene.LG7.193	0.0065261	NA	NA	0.00602358	0.00137491	NA	NA	0.00113974	0.0358923	NA	NA	0.0200256	NA	NA	NA
on.gene.LG7.2140001	0.0471408	NA	NA	0.00924038	0.00886949	NA	NA	0.04407	NA	NA	0.00284887	0.0020779	NA	NA	NA
on.gene.LG7.244	0.000465026	0.00984344	NA	NA	NA	NA	NA	NA	0.0154101	NA	0.00608532	NA	0.0105578	0.000785657	NA
on.gene.LG7.388	0.00302438	NA	NA	0.0193383	0.000412262	NA	NA	0.0185976	0.00142444	NA	NA	NA	NA	NA	0.0382773
on.gene.LG7.396	0.000315822	0.00525681	NA	NA	0.000883132	NA	0.0214541	NA	NA	NA	NA	0.00820961	NA	NA	0.00312559
on.gene.LG7.414	0.00908277	0.000418227	NA	NA	NA	NA	NA	NA	0.00198799	NA	0.0109414	NA	0.0399167	0.0375438	NA
on.gene.LG7.440	0.0256395	NA	NA	0.000681882	NA	NA	NA	0.00373079	0.00102174	0.0273655	NA	NA	NA	NA	0.00689792
on.gene.LG7.4750001	0.00165149	NA	NA	0.0349915	0.000931747	NA	NA	NA	NA	NA	0.0199118	0.000268838	NA	0.017478	NA
on.gene.LG7.501	0.0174042	NA	NA	0.041342	0.00432009	0.0322686	NA	0.000795859	NA	0.0080277	NA	NA	NA	NA	NA
on.gene.LG7.512	0.0198642	NA	NA	NA	NA	NA	NA	0.0356621	NA	NA	0.000486921	0.000908109	0.000223646	0.014481	NA
on.gene.LG7.639	0.0462765	NA	NA	NA	0.038357	0.00617938	NA	NA	0.0496186	NA	0.020174	NA	0.0064644	NA	NA
on.gene.LG7.6600001	0.00123087	NA	NA	NA	NA	NA	NA	0.0332525	0.0093828	NA	0.000196437	0.00801631	NA	NA	0.00017637
on.gene.LG7.736	0.00130542	NA	NA	0.00054109	0.0003082	NA	NA	0.000589205	NA	NA	0.00117106	0.000578864	NA	NA	NA
on.gene.LG7.751	0.0266972	NA	NA	0.00709941	0.000490465	NA	NA	0.00233318	0.0322333	NA	0.00100226	NA	NA	NA	NA
on.gene.LG7.82	0.0479266	0.0152047	NA	0.000100592	NA	NA	NA	NA	NA	0.00203064	NA	0.000202666	NA	NA	0.0014705
on.gene.LG7.839	0.00232053	NA	NA	NA	NA	0.0108655	NA	0.00257319	0.00050344	NA	0.0316357	NA	NA	NA	0.000327205
on.gene.LG8-24.155	0.00133447	NA	NA	NA	NA	0.000133358	NA	NA	NA	0.019185	NA	0.000306081	0.0149301	NA	0.000758435
on.gene.LG8-24.167	0.00628799	NA	NA	NA	NA	0.0444291	NA	0.00288691	0.000130482	NA	NA	0.0446508	NA	NA	0.000287788
on.gene.LG8-24.192	0.000243459	NA	NA	NA	0.000299539	0.032054	NA	0.000799198	0.0323759	NA	NA	NA	NA	NA	0.00726994
on.gene.LG8-24.232	0.00564995	NA	0.043955	NA	NA	NA	NA	0.000198624	0.00251572	NA	NA	0.00510277	NA	NA	0.0246736
on.gene.LG8-24.239	0.000552679	0.018871	NA	NA	0.0435058	NA	0.0110554	NA	NA	0.000643361	NA	0.0231201	NA	NA	NA
on.gene.LG8-24.278	0.0160398	NA	0.00980897	NA	NA	NA	0.00547607	0.00172713	0.00124649	NA	NA	NA	NA	NA	0.0090643
on.gene.LG8-24.288	0.000364235	0.0333637	NA	0.000549902	NA	NA	NA	NA	NA	NA	NA	0.00193565	0.0285804	NA	0.0231746
on.gene.LG8-24.293	0.004717	0.00315428	NA	0.0013503	NA	0.0409094	NA	NA	NA	NA	NA	NA	0.0432076	NA	0.00184688
on.gene.LG8-24.326	0.00413866	NA	NA	0.00791234	0.0319827	NA	NA	0.0143591	NA	NA	NA	NA	0.0226816	NA	0.0348847
on.gene.LG8-24.357	0.00121763	0.0010654	NA	0.000773957	NA	0.0244417	NA	NA	NA	0.0130567	NA	0.00243845	NA	NA	NA
on.gene.LG8-24.406	0.0118256	NA	NA	NA	0.00444417	NA	0.00257486	NA	NA	0.000345083	NA	0.0476752	0.0218698	NA	NA
on.gene.LG8-24.409	0.0126769	NA	NA	0.00460277	NA	0.0369132	0.0122852	NA	NA	NA	NA	0.0187536	NA	0.0268269	NA
on.gene.LG8-24.430	0.0126564	NA	NA	0.0219688	NA	NA	NA	NA	0.0479487	NA	0.00114395	0.0069799	NA	NA	0.00763779
on.gene.LG8-24.504	0.0061818	NA	0.0107828	NA	NA	0.0437153	NA	0.0228727	NA	NA	NA	0.000999039	0.000546411	NA	NA
on.gene.LG8-24.53	0.00027247	NA	NA	NA	NA	0.0002866	NA	NA	NA	NA	0.00362964	0.00155548	0.00601767	0.000476771	NA
on.gene.LG8-24.549	0.000711332	0.0230713	NA	0.000343953	NA	0.0138345	NA	NA	NA	0.017204	NA	NA	NA	NA	0.028608
on.gene.LG8-24.554	0.0040008	0.000129489	NA	0.000161532	NA	0.019948	NA	NA	NA	NA	NA	0.0111286	NA	NA	0.00374113
on.gene.LG8-24.6350001	0.00858903	NA	NA	NA	NA	NA	NA	0.00454284	0.00337455	NA	0.000456417	0.000149421	NA	NA	0.00468121
on.gene.LG8-24.643	0.00049715	0.00034204	NA	0.0136476	NA	NA	NA	NA	0.0474245	0.032183	NA	0.0250768	NA	NA	NA
on.gene.LG8-24.74	0.000196578	NA	NA	NA	0.0212237	NA	NA	NA	0.0029621	0.00699038	NA	0.000281123	NA	0.0337909	NA
on.gene.LG8-24.755	0.00243583	NA	NA	NA	NA	NA	NA	0.033636	0.0134932	0.00337813	NA	NA	0.00105448	NA	0.000554492
on.gene.LG9.2	0.0246317	NA	NA	NA	NA	0.049073	NA	0.00398947	0.00687605	NA	0.000900478	NA	NA	NA	0.0281444
on.gene.LG9.265	0.000345298	NA	0.00112147	NA	0.000260439	0.000261424	0.0101715	NA	NA	NA	0.000648517	NA	NA	NA	NA
on.gene.LG9.318	0.00310218	NA	NA	0.000122523	NA	NA	NA	0.000196239	0.000304703	NA	0.00109623	NA	NA	NA	0.00259451
on.gene.LG9.336	0.0372681	NA	NA	NA	NA	NA	NA	0.000707217	0.00101448	0.0404146	NA	NA	0.0396135	NA	0.0304421
on.gene.LG9.52	0.000251662	NA	NA	0.00350225	0.0297031	NA	NA	0.00226513	NA	NA	NA	0.0003147	0.0430162	NA	NA
on.gene.LG9.73	0.0207551	0.0172787	NA	0.00492815	NA	NA	0.0139833	NA	0.00546301	NA	NA	NA	NA	0.0461006	NA
on.gene.LG9.96	0.0197763	0.0183402	NA	NA	NA	0.000436979	NA	NA	NA	0.0134234	NA	0.0022488	NA	NA	0.00511417
on.gene.UNK10.1	0.0283586	NA	NA	NA	0.000121924	NA	0.0406625	0.0463723	NA	NA	NA	NA	0.0326924	NA	0.0021845
on.gene.UNK108.1	0.0107015	NA	0.00715825	NA	0.0355528	NA	0.0059657	NA	NA	NA	NA	0.0091124	NA	NA	0.00869625
on.gene.UNK108.21	0.0287959	NA	NA	NA	0.0345141	NA	NA	0.000276207	NA	NA	NA	0.0140715	0.0387423	0.00176274	NA
on.gene.UNK11.18	0.00759258	0.00131943	0.000274498	NA	0.000148853	NA	NA	NA	0.0149491	NA	NA	NA	0.000111041	NA	NA
on.gene.UNK1139.1	0.0119841	0.00139287	NA	NA	0.00508577	NA	NA	NA	NA	0.0418327	NA	0.00484071	NA	NA	0.01466
on.gene.UNK1166.1	0.0108229	NA	NA	0.0270799	NA	0.0347945	NA	NA	NA	NA	NA	0.000424193	0.0194894	NA	0.0467943
on.gene.UNK1222.1	0.0249409	0.00050138	0.029082	NA	NA	NA	NA	NA	0.0478681	NA	NA	0.000803589	NA	0.0079015	NA
on.gene.UNK13.30	0.00343868	NA	NA	NA	NA	0.0171203	NA	0.00161122	0.0189614	NA	NA	NA	0.000503324	NA	0.0211352
on.gene.UNK13.4	0.0184537	NA	NA	NA	NA	0.00640884	NA	NA	0.0369873	0.000507385	NA	NA	0.000201298	NA	0.00719123
on.gene.UNK130.13	0.0148169	0.00795543	0.00272389	NA	0.000563053	NA	NA	NA	0.00298368	NA	NA	NA	NA	0.00821106	NA
on.gene.UNK131.17	0.0155606	NA	NA	0.000796192	0.0176443	NA	NA	NA	0.00470315	NA	NA	NA	0.0308005	NA	0.000125625
on.gene.UNK134.5	0.000118979	0.0491247	0.0187741	NA	NA	NA	NA	NA	NA	0.000375449	NA	NA	0.00528371	NA	0.00142217
on.gene.UNK152.6	0.0384786	0.00450407	0.0328298	NA	0.00172851	NA	NA	NA	NA	NA	NA	0.00656719	0.00011392	NA	NA
on.gene.UNK159.2	0.0133075	0.0222003	NA	NA	NA	0.00276824	NA	NA	NA	0.0136732	NA	0.0008337	0.00289159	NA	NA
on.gene.UNK16.9	0.00173268	NA	NA	0.0220173	NA	0.00809346	NA	NA	0.00905469	0.000246418	NA	NA	NA	0.0270181	NA
on.gene.UNK161.7	0.0193056	NA	NA	0.00312897	NA	NA	NA	0.0366795	NA	NA	0.00407138	0.0275493	0.0362621	NA	NA
on.gene.UNK166.15	0.000899477	NA	NA	0.0146236	NA	0.00420828	NA	0.00888878	NA	0.000102376	NA	NA	NA	0.0179646	NA
on.gene.UNK168.4	0.00661771	NA	NA	0.000927763	NA	0.00623204	NA	NA	NA	0.0246988	NA	NA	0.00555003	NA	0.000977152
on.gene.UNK168.40001	0.00113048	NA	NA	0.0132301	0.0202375	NA	NA	0.00112985	NA	0.0380735	NA	NA	NA	NA	0.0302965
on.gene.UNK17.32	0.00987193	0.0011376	0.00013355	NA	NA	0.000801211	NA	NA	NA	NA	0.042237	NA	NA	NA	0.00122828
on.gene.UNK171.4	0.000540372	0.00362634	NA	0.00363925	NA	0.0180128	NA	NA	NA	0.0022051	NA	0.0106839	NA	NA	NA
on.gene.UNK19.43	0.0305618	NA	NA	NA	0.00565134	0.00376696	NA	NA	0.0416945	NA	NA	NA	0.0207772	NA	0.000657085
on.gene.UNK19.9	0.00414612	0.0453622	NA	0.0484866	NA	0.0205025	NA	NA	NA	NA	NA	0.00251324	NA	NA	0.000219259
on.gene.UNK192.3	0.0247352	NA	0.00878897	NA	NA	NA	0.0112629	0.0011417	0.00242934	NA	NA	NA	NA	NA	0.0271678
on.gene.UNK197.1	0.0444131	NA	0.043955	NA	NA	NA	0.00422098	0.0122291	0.00106551	NA	0.000502705	NA	NA	NA	NA
on.gene.UNK199.1	0.0432439	NA	NA	0.000222412	NA	0.0186278	NA	0.00749901	0.000611318	NA	NA	NA	NA	NA	0.00471512
on.gene.UNK2.40	0.000135782	NA	NA	NA	0.00340965	0.0267171	NA	0.0252185	NA	NA	0.0431562	NA	NA	NA	0.01289
on.gene.UNK2.66	0.000139765	NA	0.0449713	NA	0.00534967	NA	NA	NA	0.041705	0.0164556	NA	0.00201962	NA	NA	NA
on.gene.UNK20.36	0.0358235	NA	NA	NA	0.0018183	NA	NA	0.0133355	0.000862466	NA	0.0112884	0.0225914	NA	NA	NA
on.gene.UNK204.3	0.0122555	0.00814913	NA	NA	NA	NA	NA	NA	NA	0.00219988	NA	0.000975093	0.0103124	NA	0.0329062
on.gene.UNK216.3	0.000800108	NA	NA	NA	NA	NA	NA	0.00615303	0.0103748	NA	0.0032722	0.0250954	NA	NA	0.000964479
on.gene.UNK217.11	0.046715	0.00175483	NA	NA	NA	NA	NA	NA	0.000363792	NA	0.0205693	NA	0.00636023	0.0212585	NA
on.gene.UNK22.14	0.000989026	NA	0.035875	NA	NA	NA	NA	0.00285992	NA	NA	0.00891738	0.0277775	NA	NA	0.0456198
on.gene.UNK228.12	0.00962119	NA	NA	NA	NA	NA	NA	0.0130885	0.00483003	NA	0.00770733	0.0087441	NA	NA	0.0333316
on.gene.UNK2288.1	0.0138427	NA	NA	NA	NA	0.00665076	0.00619743	0.0301132	0.000449513	NA	NA	0.000369334	NA	NA	NA
on.gene.UNK237.14	0.0314498	NA	NA	NA	0.0139723	0.00738571	NA	0.00270825	NA	0.00109825	NA	NA	NA	0.031401	NA
on.gene.UNK239.4	0.00602204	NA	NA	0.0238245	NA	NA	0.00661274	NA	NA	NA	0.000581723	0.0135653	NA	0.000890194	NA
on.gene.UNK24.19	0.00288699	0.00622742	NA	0.0352234	NA	0.00212809	NA	NA	NA	0.0424189	NA	0.0016041	NA	NA	NA
on.gene.UNK24.5	0.0390926	0.00693611	0.0429459	NA	0.00427782	NA	NA	NA	0.0377852	NA	NA	0.0394766	NA	NA	NA
on.gene.UNK249.1	0.0362266	0.0287979	NA	0.000521913	NA	NA	NA	NA	NA	0.00199891	NA	0.00024559	NA	NA	0.000548381
on.gene.UNK255.1	0.000196008	NA	NA	NA	NA	0.0458803	NA	0.00295548	0.0152939	NA	NA	0.000631151	NA	NA	0.000897413
on.gene.UNK258.2	0.00385342	NA	NA	NA	NA	NA	NA	0.00366279	0.013477	0.000765735	NA	NA	0.00303097	NA	0.00927716
on.gene.UNK26.31	0.00386231	NA	NA	0.00741671	0.000825115	NA	NA	0.000858125	0.00370044	NA	NA	NA	NA	NA	0.0030407
on.gene.UNK27.4	0.00669656	NA	NA	NA	0.0219994	NA	NA	0.00036643	0.00648018	NA	NA	0.0396711	NA	NA	0.0363122
on.gene.UNK2780.1	0.00294773	NA	NA	0.0161334	NA	NA	NA	NA	0.0408686	NA	0.00108508	0.0305816	NA	NA	0.00132259
on.gene.UNK28.16	0.0290469	NA	NA	0.000458146	0.032652	NA	NA	NA	NA	NA	0.000410197	0.0311702	NA	NA	0.0289505
on.gene.UNK29.6	0.0024557	0.0473995	NA	0.000336079	NA	0.0155921	NA	NA	NA	0.0486419	NA	0.000451812	NA	NA	NA
on.gene.UNK2927.1	0.00253108	NA	NA	0.00386323	0.0088799	NA	NA	0.0174432	0.0122783	NA	NA	NA	NA	NA	0.00403703
on.gene.UNK3.3	0.000561736	NA	NA	NA	0.00930128	NA	NA	NA	NA	0.00980476	NA	0.000275611	0.0190801	NA	0.00102704
on.gene.UNK3.42	0.0147722	NA	NA	0.0010152	0.00154663	NA	NA	0.0204975	NA	NA	0.000750894	0.00094962	NA	NA	NA
on.gene.UNK3.43	0.00338427	0.00713672	NA	0.0377997	NA	NA	NA	NA	NA	0.0487068	NA	NA	0.0128119	NA	0.000468699
on.gene.UNK3.90	0.0191694	NA	NA	NA	NA	NA	NA	0.00928872	NA	NA	0.0442396	0.0249314	0.00999588	0.00527145	NA
on.gene.UNK30.25	0.00711754	0.00464504	NA	NA	NA	NA	NA	NA	NA	0.029338	NA	0.0185939	0.0201976	NA	0.00380035
on.gene.UNK30.40	0.00107886	NA	NA	0.00062723	0.00196522	NA	NA	0.00261281	NA	NA	0.00593934	0.0176517	NA	NA	NA
on.gene.UNK317.4	0.0011649	0.0135462	0.000165175	NA	0.00172499	0.00227101	NA	NA	NA	NA	0.000113566	NA	NA	NA	NA
on.gene.UNK32.20	0.029437	NA	NA	0.0438418	NA	0.0122697	NA	NA	NA	0.00520693	NA	0.0207149	NA	0.0484574	NA
on.gene.UNK35.12	0.0461977	0.000173098	NA	NA	0.0174808	NA	NA	NA	0.000391499	NA	0.0189137	NA	0.0380332	NA	NA
on.gene.UNK35.23	0.00372623	NA	NA	0.00968782	NA	0.0141945	NA	0.0197261	0.0115465	0.00339229	NA	NA	NA	NA	NA
on.gene.UNK369.3	0.0144507	0.0345735	0.0330577	NA	0.0491124	0.00417861	NA	NA	NA	NA	0.00781499	NA	NA	NA	NA
on.gene.UNK38.10	0.00669374	NA	NA	0.0326335	0.00420918	NA	NA	0.0254971	NA	NA	NA	0.000672084	NA	NA	0.00157993
on.gene.UNK4.12	0.00205582	0.00691139	0.0121724	NA	0.0207901	NA	NA	NA	0.0203143	NA	NA	NA	NA	0.00851903	NA
on.gene.UNK4.48	0.0118336	NA	NA	NA	NA	NA	0.0275239	NA	NA	0.00188511	NA	0.0483521	0.000391116	NA	0.00233767
on.gene.UNK4.50	0.0173101	0.0125795	NA	0.0497883	NA	NA	NA	NA	NA	NA	NA	0.0424137	0.00428082	NA	0.000759803
on.gene.UNK40.17	0.00118756	NA	NA	0.000173854	NA	NA	NA	0.000398711	NA	NA	0.00855002	0.00525516	0.0108881	NA	NA
on.gene.UNK41.23	0.00463233	NA	NA	0.00089922	NA	NA	NA	0.01809	0.000192252	0.0125571	NA	NA	0.000121303	NA	NA
on.gene.UNK422.2	0.00787478	NA	0.0146197	NA	NA	0.0116652	NA	0.0138839	NA	NA	0.000809228	0.0150671	NA	NA	NA
on.gene.UNK423.4	0.0498953	0.0442461	NA	0.0210852	NA	NA	0.00429277	NA	0.00632653	NA	NA	NA	NA	0.0103692	NA
on.gene.UNK472.3	0.00457068	0.000214239	0.00351574	NA	NA	NA	0.0116795	NA	NA	NA	NA	0.0139069	NA	NA	0.0135411
on.gene.UNK48.1	0.000764123	0.00684106	NA	NA	0.00310462	NA	0.0402209	NA	NA	NA	0.000277666	NA	NA	NA	0.00521872
on.gene.UNK5.30001	0.000964426	NA	NA	NA	0.0178131	0.000898148	NA	NA	NA	0.00550947	NA	NA	0.0128163	NA	0.00192593
on.gene.UNK5.52	0.00228569	NA	0.00104396	NA	NA	0.0151302	NA	0.000346498	NA	NA	0.0288248	0.00855628	NA	NA	NA
on.gene.UNK503.2	0.0361994	0.000319161	0.0112979	NA	NA	0.00292463	0.0482936	NA	NA	NA	0.0137899	NA	NA	NA	NA
on.gene.UNK51.21	0.0413552	NA	NA	0.0188527	NA	0.049092	NA	0.000152831	NA	0.0194377	NA	NA	NA	NA	0.00473777
on.gene.UNK51.4	0.000269645	NA	NA	0.000116113	NA	NA	NA	0.0472817	NA	NA	0.00301935	0.00302803	NA	NA	0.000136888
on.gene.UNK516.2	0.00198068	0.0028179	NA	NA	NA	NA	NA	NA	0.000229641	0.000411416	NA	0.000475223	NA	0.00018985	NA
on.gene.UNK541.2	0.000104591	NA	NA	0.000128571	0.0231831	0.0141199	NA	0.0163773	NA	0.0080277	NA	NA	NA	NA	NA
on.gene.UNK56.21	0.00922776	0.00238562	0.0291873	NA	0.0163813	NA	NA	NA	NA	NA	0.000545369	NA	0.0263633	NA	NA
on.gene.UNK563.2	0.000365282	NA	0.000982302	NA	NA	0.0160051	NA	0.000495563	NA	NA	0.00750213	0.0103103	NA	NA	NA
on.gene.UNK587.2	0.00331802	NA	NA	0.0181244	NA	NA	NA	NA	0.00373678	0.0010598	NA	0.00825713	NA	0.00040726	NA
on.gene.UNK59.14	0.00464131	NA	NA	NA	0.000204332	NA	NA	0.0453883	NA	NA	0.0306052	0.00111095	NA	NA	0.00274521
on.gene.UNK6.4	0.00204191	NA	NA	0.00791149	NA	0.041602	0.0019051	NA	0.0205998	NA	NA	NA	NA	0.0065996	NA
on.gene.UNK646.1	0.0106692	NA	NA	NA	NA	NA	NA	0.0204837	0.010524	NA	0.00543593	0.00461343	NA	NA	0.0178436
on.gene.UNK65.14	0.0452306	0.0043111	NA	0.00100556	NA	0.0227494	NA	NA	NA	NA	NA	NA	0.0100761	NA	0.000454374
on.gene.UNK657.1	0.00209665	NA	NA	0.000149517	0.00484553	NA	NA	0.0307755	0.00300453	0.0124584	NA	NA	NA	NA	NA
on.gene.UNK67.22	0.0213199	0.00168037	0.000312831	NA	0.000264144	NA	NA	NA	0.00966883	NA	NA	NA	NA	0.00785613	NA
on.gene.UNK67.26	0.0177036	NA	NA	0.000288011	NA	0.0288355	NA	0.0026718	NA	NA	NA	NA	0.0221634	NA	0.000252657
on.gene.UNK67.27	0.00564063	0.00433244	NA	0.0179	NA	NA	0.0108217	NA	0.00750688	NA	NA	NA	NA	0.0382691	NA
on.gene.UNK68.4	0.00645836	NA	NA	0.0437009	0.0247317	NA	NA	0.00246942	0.0026434	NA	NA	NA	NA	NA	0.00484219
on.gene.UNK69.8	0.0248082	0.000130546	0.0268019	NA	NA	NA	0.000598799	NA	0.0177015	0.00966762	NA	NA	NA	NA	NA
on.gene.UNK7.20	0.00078636	NA	NA	0.0126175	NA	NA	NA	0.0157244	NA	NA	0.0109027	0.000151891	0.000402053	NA	NA
on.gene.UNK71.19	0.000160031	NA	0.00631714	NA	NA	0.0498779	NA	0.00489581	NA	NA	NA	0.00416411	NA	0.000121703	NA
on.gene.UNK73.6	0.0404519	NA	NA	0.00539121	NA	NA	NA	0.0006715	0.000156579	NA	0.00508749	NA	NA	NA	0.0118109
on.gene.UNK79.13	0.0057029	NA	NA	NA	0.00798679	NA	NA	0.000210783	NA	0.0343878	NA	NA	0.0153464	NA	0.00184068
on.gene.UNK8.340001	0.00649991	NA	0.000976108	NA	NA	0.000130735	NA	NA	NA	NA	0.0122386	NA	0.014636	0.00889507	NA
on.gene.UNK812.1	0.00471215	NA	NA	NA	NA	0.0491743	NA	NA	NA	NA	0.0386499	0.01171	0.000665258	0.0457474	NA
on.gene.UNK86.13	0.0285856	NA	NA	0.000136939	NA	NA	0.00418733	0.0135069	NA	NA	0.0167095	0.00765948	NA	NA	NA
on.gene.UNK88.8	0.00663406	NA	NA	0.00281426	NA	NA	NA	0.000131601	0.0207253	NA	0.0132403	0.000473277	NA	NA	NA
on.gene.UNK89.16	0.0264002	NA	NA	0.00237226	0.00765538	NA	NA	NA	NA	NA	0.00154816	0.00480174	0.0334962	NA	NA
on.gene.UNK9.42	0.0340042	NA	NA	0.00793303	NA	NA	NA	0.000463957	0.000791033	NA	NA	0.00498919	NA	NA	0.0317239
on.gene.UNK90.14	0.0245907	NA	NA	0.0114779	0.00233294	NA	NA	0.00496725	NA	0.0443833	NA	NA	0.000286493	NA	NA
on.gene.UNK98.12	0.0315402	NA	NA	0.0435482	0.000194886	NA	NA	NA	0.0457665	NA	0.000540158	NA	0.0118595	NA	NA
on.gene.UNK98.8	0.0242566	NA	0.0262606	NA	NA	NA	0.000138193	0.00699493	NA	0.00136662	NA	NA	NA	NA	0.00013755
on.gene.UNK99.14	0.00138489	NA	NA	0.0313326	NA	0.00129529	NA	0.00876506	NA	NA	NA	0.0473561	0.00347546	NA	NA
on.gene.UNK99.19	0.00606111	NA	NA	0.0470335	0.0022824	NA	NA	0.0351815	NA	NA	NA	0.0220918	NA	0.00767002	NA
on.gene.LG1.102	NA	0.00329119	NA	NA	0.0013086	0.00283192	NA	NA	0.00156371	NA	0.00122252	NA	0.00326324	NA	NA
on.gene.LG1.150	NA	0.000297256	0.000896689	NA	NA	NA	NA	0.0119745	NA	NA	0.00935421	NA	NA	0.0352426	0.000688355
on.gene.LG1.258	NA	0.000273745	0.0110998	0.0192668	NA	NA	NA	0.00104695	NA	NA	NA	NA	0.000443383	NA	0.022216
on.gene.LG1.343	NA	0.000137303	NA	NA	0.00554038	NA	NA	0.000144378	NA	NA	NA	0.0195497	NA	0.00659254	0.00290528
on.gene.LG1.416	NA	0.0280662	0.0143254	0.00163208	NA	NA	NA	0.0100737	NA	0.00116531	0.000124296	NA	NA	NA	NA
on.gene.LG1.533	NA	0.00213419	NA	NA	0.01107	NA	NA	NA	0.000241125	NA	0.0233955	NA	0.00478928	0.0180563	NA
on.gene.LG1.596	NA	0.00428268	NA	NA	0.0133926	NA	NA	NA	0.00105403	0.0172268	NA	0.000150695	NA	0.0468715	NA
on.gene.LG1.616	NA	0.00167245	NA	NA	0.0282613	NA	0.0155428	0.00624548	NA	NA	NA	NA	NA	0.00331759	0.000446782
on.gene.LG1.648	NA	0.0100216	NA	NA	NA	NA	NA	0.00995694	NA	NA	NA	0.0332175	0.00145193	0.000508726	0.00024717
on.gene.LG1.652	NA	0.00221899	NA	0.00023402	NA	NA	NA	NA	0.0365914	NA	0.0478248	NA	0.00239172	0.00686365	NA
on.gene.LG1.692	NA	0.000276959	0.00369594	NA	NA	0.0428607	NA	0.0306861	NA	NA	0.0322988	NA	NA	NA	0.0250915
on.gene.LG1.7050001	NA	0.0263433	NA	NA	0.00784475	NA	0.010784	0.00266448	NA	NA	NA	NA	NA	0.00386613	0.0198668
on.gene.LG1.719	NA	0.0153915	NA	NA	0.0157386	NA	NA	0.000100433	NA	NA	NA	0.0463267	NA	0.00100132	0.0388728
on.gene.LG1.739	NA	0.0339039	0.00208545	0.00433291	NA	0.0038232	NA	0.0237338	NA	NA	NA	0.0138298	NA	NA	NA
on.gene.LG1.92	NA	0.0165408	NA	NA	0.00937917	0.0190646	NA	0.000394842	NA	0.000852442	0.0217706	NA	NA	NA	NA
on.gene.LG10.106	NA	0.0295421	NA	NA	0.00191991	0.000714576	NA	0.00857189	0.000141158	NA	NA	NA	0.00776904	NA	NA
on.gene.LG10.181	NA	0.00145571	NA	0.000658193	NA	0.00361583	NA	NA	NA	NA	NA	0.00407687	0.00275347	NA	0.000576902
on.gene.LG10.189	NA	0.015589	NA	NA	NA	NA	NA	0.00939557	NA	0.000580294	0.000889408	NA	NA	0.00201497	0.00196876
on.gene.LG10.2	NA	0.00648623	NA	NA	NA	NA	NA	0.00930573	NA	0.000481455	0.000203241	NA	NA	0.00197568	0.000657085
on.gene.LG10.218	NA	0.0475211	0.0255735	NA	0.000134979	NA	0.00104264	NA	NA	NA	NA	0.011157	0.0355151	NA	NA
on.gene.LG10.225	NA	0.000489878	NA	NA	0.00055894	NA	NA	0.000308934	0.0180072	0.044598	0.0407929	NA	NA	NA	NA
on.gene.LG10.3070001	NA	0.00630794	NA	NA	NA	0.00205601	NA	NA	0.0363427	0.00132024	0.0285528	NA	0.00621899	NA	NA
on.gene.LG10.421	NA	0.0277065	NA	NA	0.00420144	NA	0.00624772	0.00553924	NA	NA	NA	0.0150385	NA	0.0383415	NA
on.gene.LG10.479	NA	0.00236616	NA	NA	0.000107	0.00831502	NA	0.00436168	NA	0.000207713	0.000560002	NA	NA	NA	NA
on.gene.LG11.213	NA	0.0333084	0.000413745	NA	0.000309268	NA	NA	NA	NA	0.0417407	0.0185936	NA	0.000174038	NA	NA
on.gene.LG11.30001	NA	0.00146663	0.00131748	0.0415245	NA	NA	0.00589954	NA	NA	0.0289892	NA	0.0230563	NA	NA	NA
on.gene.LG11.314	NA	0.0477981	NA	0.0106313	NA	0.00586846	NA	NA	NA	NA	NA	0.0208082	0.00894334	NA	0.0174268
on.gene.LG11.508	NA	0.00107928	NA	NA	NA	NA	0.000858824	NA	NA	NA	NA	0.00044596	0.0185835	0.00552276	0.0194179
on.gene.LG11.593	NA	0.000186124	NA	NA	NA	0.0305192	NA	NA	0.0147353	0.000420331	0.0419019	NA	NA	0.034889	NA
on.gene.LG11.7050001	NA	0.00434963	NA	NA	0.000106823	NA	NA	0.000107318	0.00713038	NA	0.0257565	NA	0.010455	NA	NA
on.gene.LG11.734	NA	0.0151241	0.00075209	0.000155691	NA	0.0218555	0.00750772	0.0294189	NA	NA	NA	NA	NA	NA	NA
on.gene.LG11.7930001	NA	0.0132855	NA	NA	NA	NA	NA	0.0120823	0.0103746	0.0471397	0.0429571	NA	0.0373625	NA	NA
on.gene.LG11.830	NA	0.00216295	NA	NA	0.0112687	0.0450258	NA	NA	0.0177589	NA	0.00670814	NA	0.0495303	NA	NA
on.gene.LG11.89	NA	0.0466972	NA	NA	0.000197405	NA	0.00168542	0.00437841	NA	NA	NA	0.0194294	NA	0.020844	NA
on.gene.LG11.9	NA	0.00541485	NA	NA	0.00305525	NA	0.0310427	0.00398588	NA	NA	NA	NA	NA	0.0381571	0.0286118
on.gene.LG11.900	NA	0.00205753	0.00193945	0.00367164	NA	NA	NA	0.000372322	NA	0.000283678	0.00126255	NA	NA	NA	NA
on.gene.LG11.913	NA	0.000252468	0.0374734	0.0076099	NA	0.00418695	NA	0.000669561	NA	NA	NA	NA	0.04121	NA	NA
on.gene.LG11.965	NA	0.0124063	NA	0.00124888	NA	NA	NA	0.0390827	NA	0.00117439	NA	NA	0.0206213	NA	0.000403104
on.gene.LG12.124	NA	0.0217982	NA	NA	NA	0.00977933	NA	0.0264828	NA	0.0305987	0.0284504	NA	0.000195512	NA	NA
on.gene.LG12.127	NA	0.00101869	NA	NA	NA	NA	NA	0.0331521	0.00578811	0.000280442	0.0397569	NA	0.00722451	NA	NA
on.gene.LG12.151	NA	0.00280494	0.0049356	0.007633	NA	NA	0.0176261	0.000561646	0.0041424	NA	NA	NA	NA	NA	NA
on.gene.LG12.195	NA	0.000536107	NA	NA	NA	0.046375	NA	NA	0.000323105	0.0481386	0.0176787	NA	0.014939	NA	NA
on.gene.LG12.234	NA	0.00918629	0.0108536	0.000914459	NA	NA	0.0447122	0.0406878	NA	NA	0.0337607	NA	NA	NA	NA
on.gene.LG12.334	NA	0.00510002	NA	0.0204205	NA	NA	NA	0.0454748	NA	NA	0.0365495	NA	0.0273167	0.000403237	NA
on.gene.LG12.416	NA	0.0108752	NA	NA	0.00125576	0.0244824	NA	NA	0.00747571	NA	0.00530833	NA	0.00704891	NA	NA
on.gene.LG12.435	NA	0.0027721	NA	NA	0.0372117	NA	NA	NA	NA	0.04645	NA	0.00108525	0.0155231	NA	0.0198689
on.gene.LG12.499	NA	0.0173499	NA	NA	0.0341414	NA	NA	NA	NA	NA	NA	0.0230723	0.0432524	0.00018881	0.0251105
on.gene.LG12.591	NA	0.0134206	0.000152996	NA	0.01107	0.00415653	0.0267744	NA	NA	NA	NA	NA	NA	NA	0.0390941
on.gene.LG12.645	NA	0.0119063	NA	NA	0.0245705	NA	0.000475599	NA	NA	NA	NA	0.019026	0.000133279	NA	0.00150716
on.gene.LG12.671	NA	0.0209114	NA	NA	0.000686866	NA	0.000206273	0.0136114	NA	NA	NA	NA	NA	0.00533879	0.00459774
on.gene.LG12.750	NA	0.0210222	0.000856703	NA	0.0173516	NA	NA	NA	0.00427105	0.010217	0.00019292	NA	NA	NA	NA
on.gene.LG12.752	NA	0.0130696	0.018539	0.00159741	NA	NA	NA	0.000278865	NA	0.0407824	0.00677647	NA	NA	NA	NA
on.gene.LG12.765	NA	0.0073312	0.00526347	NA	NA	NA	NA	0.0163061	NA	0.0417326	0.00563412	NA	NA	NA	0.000199252
on.gene.LG12.796	NA	0.0484329	NA	NA	NA	NA	NA	0.04624	NA	0.00468959	0.00405004	NA	NA	0.00120048	0.000727215
on.gene.LG12.840	NA	0.000433225	NA	NA	0.00123117	0.0437433	NA	NA	0.0175102	0.0028932	0.0126006	NA	NA	NA	NA
on.gene.LG12.843	NA	0.00142153	NA	NA	0.00395572	NA	NA	0.000180313	NA	NA	NA	NA	0.0013375	0.0111861	0.0222497
on.gene.LG12.863	NA	0.00168103	NA	NA	NA	NA	0.00890942	0.000120248	0.042428	0.00512483	0.00141077	NA	NA	NA	NA
on.gene.LG12.890	NA	0.00161977	NA	0.00968782	NA	0.00189193	NA	0.0067428	NA	NA	NA	NA	NA	0.00527113	0.000665216
on.gene.LG12.933	NA	0.00587816	NA	NA	NA	0.00136689	NA	NA	NA	0.00766211	NA	0.0266457	0.0435515	NA	0.0216506
on.gene.LG13.220	NA	0.0394707	NA	NA	0.0384617	0.035989	0.0123988	NA	NA	NA	0.0301994	NA	NA	NA	0.00743039
on.gene.LG13.31	NA	0.0112764	NA	NA	NA	NA	NA	0.0334898	0.0229888	0.00617935	0.034811	NA	0.0183793	NA	NA
on.gene.LG13.342	NA	0.000968321	NA	NA	0.00129182	0.00731868	NA	0.0100002	NA	0.0333918	0.00326632	NA	NA	NA	NA
on.gene.LG13.427	NA	0.0248717	NA	0.0237328	NA	0.000315382	NA	NA	NA	0.00178701	NA	0.000107525	0.00148592	NA	NA
on.gene.LG13.45	NA	0.0276305	NA	NA	0.00233046	NA	NA	0.0295962	NA	0.0169572	0.0188581	NA	0.00883652	NA	NA
on.gene.LG13.531	NA	0.00254468	NA	0.0167681	NA	NA	NA	0.0463295	NA	0.00189124	NA	NA	NA	0.0255667	0.000731982
on.gene.LG13.622	NA	0.0180742	0.0165991	0.000762074	NA	NA	NA	0.00062571	NA	0.0016367	NA	NA	NA	NA	0.0466998
on.gene.LG13.700	NA	0.000659013	0.00902154	0.00329562	NA	NA	NA	0.000647834	NA	NA	NA	NA	0.0372952	0.000117499	NA
on.gene.LG13.746	NA	0.000666541	0.0296849	NA	0.0160054	0.00743226	NA	NA	0.00206356	NA	NA	NA	0.0452436	NA	NA
on.gene.LG13.755	NA	0.00209324	NA	0.000264238	NA	0.0452667	NA	NA	NA	0.00721482	NA	NA	0.0456926	NA	0.000354491
on.gene.LG13.798	NA	0.0107102	NA	NA	NA	0.0276541	NA	0.019823	NA	NA	NA	0.000161156	0.00122333	NA	0.0232674
on.gene.LG13.870	NA	0.0419415	NA	NA	0.037047	0.00292563	NA	0.033248	NA	0.00240395	0.00218608	NA	NA	NA	NA
on.gene.LG13.877	NA	0.000395522	NA	NA	0.00134649	NA	0.0495727	0.00610478	NA	NA	NA	0.00272719	NA	NA	0.0121607
on.gene.LG14.364	NA	0.0253332	NA	NA	NA	NA	0.0219695	NA	NA	NA	NA	0.0246404	0.00191475	0.0278754	0.0014461
on.gene.LG14.381	NA	0.000954866	NA	0.016888	NA	NA	NA	0.0296953	NA	NA	NA	0.00390119	0.011823	NA	0.00207514
on.gene.LG14.536	NA	0.0122719	NA	0.00886552	NA	NA	0.010523	NA	0.00928739	0.00105586	NA	0.0158803	NA	NA	NA
on.gene.LG14.566	NA	0.000134876	0.00860554	NA	0.0321768	NA	NA	NA	0.00972879	NA	NA	0.000276942	NA	0.0328321	NA
on.gene.LG14.609	NA	0.000134301	NA	NA	0.00777851	0.019948	NA	0.0416908	NA	NA	0.000295398	NA	NA	NA	0.0290736
on.gene.LG14.622	NA	0.032723	NA	0.00350849	NA	0.0420945	0.00272043	NA	0.0182183	NA	NA	NA	NA	0.044778	NA
on.gene.LG14.852	NA	0.034359	NA	0.02898	NA	0.00175172	0.0400085	0.00231815	0.0242713	NA	NA	NA	NA	NA	NA
on.gene.LG15.152	NA	0.000416859	NA	NA	NA	0.00246984	NA	0.00908377	0.0238964	0.0299008	NA	NA	0.0180231	NA	NA
on.gene.LG15.323	NA	0.00099114	0.00107745	NA	0.00733347	NA	0.00484303	NA	NA	NA	NA	0.0126992	NA	NA	0.000309465
on.gene.LG15.560	NA	0.0154579	0.0311155	NA	NA	NA	0.0438934	NA	NA	0.0167063	0.00130657	NA	0.0138852	NA	NA
on.gene.LG15.673	NA	0.00860181	0.000190325	NA	0.0223909	NA	NA	NA	NA	0.000486077	NA	NA	NA	0.00890731	0.000240679
on.gene.LG15.724	NA	0.00167271	0.0404137	NA	NA	NA	0.0194128	0.0197013	NA	0.0371509	NA	NA	0.0207029	NA	NA
on.gene.LG15.733	NA	0.0197505	NA	0.024841	NA	0.00151363	NA	NA	NA	0.0157871	NA	0.000418897	0.0228229	NA	NA
on.gene.LG16-21.142	NA	0.0462336	NA	0.0165258	NA	NA	NA	NA	NA	0.0445742	0.00263177	NA	NA	0.00619482	0.000148892
on.gene.LG16-21.1850001	NA	0.00208869	0.00241627	0.000987175	NA	NA	NA	0.00185124	NA	0.0322652	0.0277599	NA	NA	NA	NA
on.gene.LG16-21.2370002	NA	0.00145447	NA	0.00422261	NA	0.00144001	NA	NA	NA	NA	NA	0.000164871	0.0124571	NA	0.0292821
on.gene.LG16-21.261	NA	0.0352711	NA	NA	0.0200062	0.0437392	NA	0.00709874	NA	NA	0.0376563	NA	0.0103782	NA	NA
on.gene.LG16-21.301	NA	0.0232921	NA	NA	0.00389847	0.0387169	NA	0.00086368	NA	NA	0.0109607	NA	0.00123956	NA	NA
on.gene.LG16-21.308	NA	0.000391639	0.0284344	0.0355732	NA	0.00559366	NA	NA	NA	NA	NA	NA	NA	0.000454681	0.00111177
on.gene.LG16-21.322	NA	0.041462	NA	NA	0.025562	NA	NA	0.000648837	NA	NA	NA	0.000944729	0.0102875	0.0074977	NA
on.gene.LG16-21.325	NA	0.0113541	NA	NA	NA	0.000475727	0.042642	0.0458959	NA	NA	NA	0.0312995	NA	0.0121343	NA
on.gene.LG16-21.331	NA	0.0398562	NA	NA	0.000790994	0.00047101	NA	0.00478111	NA	0.00223938	NA	NA	NA	NA	0.00106893
on.gene.LG16-21.345	NA	0.00212781	NA	NA	NA	NA	0.00208152	0.000328633	NA	NA	0.0497268	NA	NA	0.0316781	0.0472607
on.gene.LG16-21.427	NA	0.044607	0.0217108	NA	0.0461695	NA	NA	NA	NA	0.0178681	0.000143436	NA	NA	NA	0.000800843
on.gene.LG16-21.446	NA	0.00851373	NA	0.0267031	NA	0.018985	NA	NA	NA	NA	NA	0.00280912	0.0274191	NA	0.0424898
on.gene.LG16-21.550	NA	0.000160144	NA	NA	0.000834494	0.0173655	NA	0.00037218	NA	0.00797236	0.00270458	NA	NA	NA	NA
on.gene.LG16-21.573	NA	0.00957701	NA	NA	NA	NA	NA	0.0383709	NA	NA	NA	0.00680066	0.00239505	0.0196563	0.00235338
on.gene.LG16-21.634	NA	0.0341678	0.00112419	NA	NA	0.000170581	0.0138363	NA	NA	NA	NA	0.0171396	NA	NA	0.000651902
on.gene.LG16-21.678	NA	0.000583906	NA	NA	0.00559021	NA	NA	0.000452142	NA	NA	NA	0.0233341	NA	0.0235422	0.0161403
on.gene.LG16-21.72	NA	0.0225633	NA	0.0164404	NA	NA	NA	NA	NA	0.0117621	0.00195518	NA	NA	0.00145662	0.000128894
on.gene.LG16-21.781	NA	0.000260214	0.0455506	0.000187056	NA	NA	NA	0.0336869	NA	0.013515	NA	NA	NA	NA	0.000765082
on.gene.LG16-21.93	NA	0.0300026	0.00115455	NA	0.0285001	NA	0.0412146	NA	NA	NA	NA	0.00212918	0.0185719	NA	NA
on.gene.LG17.164	NA	0.0265133	NA	0.0230398	NA	0.0305033	0.0283175	0.0018202	NA	NA	NA	0.00905737	NA	NA	NA
on.gene.LG17.251	NA	0.0253282	0.0363738	0.00252583	NA	0.00989478	0.00450866	NA	0.0291802	NA	NA	NA	NA	NA	NA
on.gene.LG17.268	NA	0.00527864	0.0030924	0.00125614	NA	0.00125314	NA	0.00104981	NA	NA	NA	0.00115109	NA	NA	NA
on.gene.LG17.277	NA	0.000251484	NA	NA	NA	0.0175823	NA	NA	0.000165481	0.00695225	0.00756311	NA	0.00812586	NA	NA
on.gene.LG17.3710001	NA	0.0238621	NA	0.00748034	NA	0.00244137	NA	NA	NA	0.0445034	NA	0.00510126	NA	0.0359167	NA
on.gene.LG17.448	NA	0.000182563	NA	NA	NA	0.0370224	NA	0.0136733	NA	0.0011194	NA	NA	NA	0.0278649	0.000288207
on.gene.LG17.453	NA	0.0280309	NA	NA	0.0021911	0.000420955	NA	0.0187014	NA	0.00452867	0.00569956	NA	NA	NA	NA
on.gene.LG17.482	NA	0.0404411	NA	NA	NA	0.00608067	NA	0.0112646	0.0111774	0.0426714	0.0294839	NA	NA	NA	NA
on.gene.LG17.522	NA	0.00190033	NA	0.00187817	NA	NA	0.00087252	NA	0.000478579	NA	0.00495478	NA	0.00187671	NA	NA
on.gene.LG17.547	NA	0.000122521	0.00471385	0.00107317	NA	0.000113732	NA	0.000185479	0.0113506	NA	NA	NA	NA	NA	NA
on.gene.LG17.623	NA	0.0125267	NA	NA	NA	0.00338731	NA	0.0177078	NA	0.0201372	0.0294911	NA	0.000129381	NA	NA
on.gene.LG17.649	NA	0.000546358	NA	0.016748	NA	NA	0.0389111	NA	0.000406275	NA	0.0268503	NA	0.0250892	NA	NA
on.gene.LG17.652	NA	0.00930435	NA	NA	0.049572	NA	0.0321255	NA	NA	0.000864727	0.0392708	NA	NA	NA	0.00304937
on.gene.LG17.762	NA	0.0253332	NA	NA	0.0411826	NA	NA	0.0167784	0.000104795	NA	0.0029756	NA	0.00672189	NA	NA
on.gene.LG17.767	NA	0.000713398	0.0136817	0.00188264	NA	0.0413454	NA	0.0025567	NA	NA	NA	0.0128793	NA	NA	NA
on.gene.LG17.783	NA	0.00142977	0.00718642	0.00044003	NA	NA	NA	0.0102123	NA	0.000199724	NA	NA	NA	0.000445692	NA
on.gene.LG18.109	NA	0.0400419	NA	NA	NA	NA	NA	0.0260646	NA	NA	NA	0.0179048	0.0234039	0.0408733	0.0366134
on.gene.LG18.144	NA	0.00118055	NA	NA	NA	NA	0.0138969	NA	NA	0.0460374	NA	0.0294974	NA	0.00478468	0.0464674
on.gene.LG18.146	NA	0.0042338	NA	NA	0.00380764	0.0456568	NA	0.000305183	0.00468238	NA	NA	NA	0.0441962	NA	NA
on.gene.LG18.161	NA	0.0256039	NA	NA	0.00486207	0.0196452	NA	NA	0.00284871	NA	0.00229164	NA	0.0372429	NA	NA
on.gene.LG18.205	NA	0.00323013	0.000135321	NA	0.0161136	NA	NA	NA	NA	0.0130567	0.0461769	NA	NA	0.000589772	NA
on.gene.LG18.206	NA	0.00303178	0.0166897	NA	NA	NA	0.0443577	NA	NA	0.000480327	NA	0.0142234	0.00272455	NA	NA
on.gene.LG18.223	NA	0.0257641	NA	NA	0.000240645	0.0333669	0.000108292	NA	NA	0.0124475	0.000837982	NA	NA	NA	NA
on.gene.LG18.288	NA	0.00479497	NA	NA	0.00117146	NA	0.0109333	NA	NA	NA	NA	0.00581749	0.033033	NA	0.0183002
on.gene.LG18.301	NA	0.0140573	NA	NA	NA	NA	NA	0.017302	NA	NA	NA	0.00226949	0.00436765	0.0303614	0.014598
on.gene.LG18.412	NA	0.000165188	NA	NA	0.000125254	0.0076976	NA	NA	0.000134221	NA	0.00551819	NA	0.00586555	NA	NA
on.gene.LG18.479	NA	0.00414478	NA	NA	0.000114035	NA	NA	0.000344476	0.0026604	NA	0.0217706	NA	0.0377108	NA	NA
on.gene.LG18.505	NA	0.00490142	NA	NA	0.000115192	NA	NA	0.00175063	0.0155233	NA	0.0435041	NA	0.0220698	NA	NA
on.gene.LG18.595	NA	0.000227427	NA	NA	0.0114673	NA	0.00624078	0.0049436	NA	NA	0.0135458	NA	NA	0.00270843	NA
on.gene.LG18.601	NA	0.00728687	0.00197978	0.00323034	NA	NA	0.000487804	0.013813	NA	NA	NA	NA	0.0366034	NA	NA
on.gene.LG18.618	NA	0.00338871	0.026241	0.000675908	NA	NA	NA	NA	NA	NA	0.0273759	NA	NA	0.0177798	0.000508457
on.gene.LG18.745	NA	0.0125475	0.00697338	NA	0.00932231	0.0431943	NA	NA	0.00150853	NA	NA	NA	NA	0.0378033	NA
on.gene.LG18.762	NA	0.000636447	NA	NA	0.00820235	NA	NA	NA	NA	0.0276792	NA	0.0243386	NA	0.000715328	0.017769
on.gene.LG18.8	NA	0.002232	NA	NA	0.000618403	0.0354219	NA	0.000641099	NA	0.0247229	0.0157525	NA	NA	NA	NA
on.gene.LG18.90	NA	0.000728872	NA	0.032373	NA	NA	NA	0.0474671	NA	NA	NA	0.000943771	0.00371173	NA	0.00165157
on.gene.LG19.140	NA	0.034871	NA	0.0357067	NA	NA	0.0110596	0.0156038	NA	NA	NA	0.0422052	0.000624142	NA	NA
on.gene.LG19.274	NA	0.00953337	NA	NA	0.000843448	0.00808029	NA	0.000125554	NA	0.00161494	0.0338303	NA	NA	NA	NA
on.gene.LG19.291	NA	0.00122372	NA	NA	0.00239273	NA	0.0033642	NA	NA	NA	NA	0.0121184	0.0123503	NA	0.000876033
on.gene.LG19.466	NA	0.000437129	NA	0.0187519	NA	0.000990547	NA	NA	NA	0.00457656	NA	NA	0.00123956	NA	0.0238847
on.gene.LG19.511	NA	0.000744529	0.000416001	NA	NA	0.0337952	NA	0.0161646	NA	NA	0.0211574	NA	NA	NA	0.0124594
on.gene.LG19.538	NA	0.000673311	NA	NA	0.0120556	0.000599637	NA	0.00246942	NA	0.00230773	0.0129702	NA	NA	NA	NA
on.gene.LG19.614	NA	0.0417497	NA	NA	0.00141936	0.00167247	NA	NA	0.0463931	NA	0.0363938	NA	0.0430517	NA	NA
on.gene.LG19.624	NA	0.0253772	0.00814977	0.0217164	NA	NA	NA	0.00410371	NA	NA	NA	NA	NA	0.00611167	0.0196881
on.gene.LG19.654	NA	0.00599668	0.023296	0.000150835	NA	NA	NA	NA	0.0192998	NA	0.0205049	NA	0.00441719	NA	NA
on.gene.LG19.6980002	NA	0.00826583	NA	NA	NA	NA	0.00149125	0.00557028	NA	0.0405881	NA	NA	0.000917834	NA	0.00011555
on.gene.LG19.7810001	NA	0.000233153	NA	NA	0.000582721	NA	0.0468378	0.00362189	NA	NA	NA	0.00355135	NA	NA	0.0144442
on.gene.LG19.788	NA	0.000231746	NA	NA	0.000349414	NA	NA	0.0259517	0.00585563	0.00951193	NA	NA	0.0477635	NA	NA
on.gene.LG19.794	NA	0.000971751	NA	0.00134726	NA	0.0101975	NA	NA	NA	NA	NA	0.00454901	0.00327847	NA	0.000448155
on.gene.LG2.110	NA	0.000437411	NA	0.0368066	NA	0.0364144	NA	0.0327035	0.00310794	NA	NA	0.000114856	NA	NA	NA
on.gene.LG2.133	NA	0.0279078	NA	NA	NA	NA	NA	0.00047844	0.000168954	0.00385361	0.000383072	NA	0.0243599	NA	NA
on.gene.LG2.163	NA	0.0317118	0.0231541	NA	0.00273727	NA	NA	NA	NA	0.00643222	NA	0.000788221	0.0215083	NA	NA
on.gene.LG2.167	NA	0.000973968	NA	0.0308325	NA	0.000461011	NA	0.0461399	0.00180226	0.039334	NA	NA	NA	NA	NA
on.gene.LG2.193	NA	0.00372669	NA	0.00679343	NA	NA	NA	0.0425408	NA	NA	0.00673604	NA	NA	0.0292495	0.00142502
on.gene.LG2.290	NA	0.00767457	NA	NA	NA	0.0455785	NA	NA	NA	0.00882979	NA	0.000246199	0.000270737	NA	0.00437171
on.gene.LG2.3230001	NA	0.000105768	NA	NA	0.000883295	NA	0.000741952	0.00463715	NA	NA	NA	0.00348057	NA	NA	0.00648665
on.gene.LG2.466	NA	0.0215058	NA	0.00576137	NA	0.0120883	NA	NA	NA	0.000170657	NA	NA	0.0183813	NA	0.00380035
on.gene.LG2.487	NA	0.00239817	0.0305675	0.0116279	NA	NA	NA	0.00047113	NA	0.00178701	0.00110319	NA	NA	NA	NA
on.gene.LG2.492	NA	0.00269629	NA	NA	NA	NA	NA	0.000417891	NA	NA	NA	0.0014411	0.00450775	0.00419864	0.00866183
on.gene.LG2.541	NA	0.0167148	NA	NA	0.0203854	0.00491252	NA	0.034833	NA	0.00765175	0.00258684	NA	NA	NA	NA
on.gene.LG2.544	NA	0.0136925	0.0034847	NA	NA	NA	NA	0.000116076	0.0164587	NA	0.00678822	NA	0.00693159	NA	NA
on.gene.LG2.95	NA	0.00170791	NA	NA	0.000125197	NA	NA	0.000128141	0.01361	NA	0.00567654	NA	0.00128653	NA	NA
on.gene.LG20.126	NA	0.0387237	0.0115039	0.0195205	NA	NA	NA	0.0464055	0.017046	NA	NA	0.00207085	NA	NA	NA
on.gene.LG20.139	NA	0.00890964	NA	NA	0.0198961	NA	NA	NA	NA	0.0171451	NA	0.000443259	0.00200095	NA	0.0151981
on.gene.LG20.4	NA	0.000298107	0.00324001	NA	NA	0.00132144	0.00027934	NA	0.015803	NA	NA	0.0456689	NA	NA	NA
on.gene.LG20.41	NA	0.000141971	NA	0.00394873	NA	NA	NA	NA	NA	0.0117234	NA	0.00485865	0.0286142	NA	0.00101429
on.gene.LG20.441	NA	0.0498914	NA	NA	NA	0.0157956	0.0235957	0.0440245	0.00111475	NA	NA	0.0230159	NA	NA	NA
on.gene.LG20.503	NA	0.0161525	0.00412291	0.00157726	NA	NA	0.0231051	0.00332796	0.000944034	NA	NA	NA	NA	NA	NA
on.gene.LG20.5650002	NA	0.000631157	0.0260322	NA	NA	NA	0.00207093	NA	NA	0.041883	NA	NA	0.00455421	NA	0.0410901
on.gene.LG20.612	NA	0.0325709	0.0265198	0.0274011	NA	NA	NA	0.0286402	NA	NA	NA	0.000121492	0.00405543	NA	NA
on.gene.LG20.618	NA	0.00523761	0.0224807	0.00792301	NA	NA	NA	0.00731735	NA	0.0238949	0.0139665	NA	NA	NA	NA
on.gene.LG20.625	NA	0.0372961	NA	NA	0.000435799	0.0235728	NA	0.000294056	NA	0.0267672	0.000163388	NA	NA	NA	NA
on.gene.LG20.66	NA	0.000542821	NA	0.0074889	NA	NA	0.0206171	0.00663667	0.000957882	0.000316147	NA	NA	NA	NA	NA
on.gene.LG20.70	NA	0.000933926	NA	NA	0.0179315	0.00535659	NA	NA	0.00897676	NA	0.000105044	NA	NA	0.000110425	NA
on.gene.LG20.843	NA	0.00112156	NA	NA	0.000773079	0.00130636	0.00274375	NA	NA	NA	0.00110002	NA	NA	NA	0.00189963
on.gene.LG20.873	NA	0.00025333	0.00396998	NA	NA	0.00470398	0.000215401	NA	NA	NA	NA	0.020845	NA	NA	0.0215925
on.gene.LG20.878	NA	0.00634301	NA	NA	0.00658677	0.00272147	0.0339533	NA	NA	NA	0.00165609	NA	NA	NA	0.0186991
on.gene.LG20.89	NA	0.00338214	NA	NA	NA	0.0334389	NA	NA	0.00465727	0.00863161	0.000388488	NA	0.000370259	NA	NA
on.gene.LG20.925	NA	0.0314087	NA	NA	0.04481	NA	0.00104494	0.011504	NA	NA	NA	NA	NA	0.000126904	0.000297201
on.gene.LG20.937	NA	0.000774113	NA	NA	0.000531044	NA	NA	0.000109722	NA	NA	NA	NA	0.000331841	0.0259548	0.047532
on.gene.LG22.18	NA	0.0129429	NA	NA	0.00246643	NA	0.0256613	NA	NA	NA	NA	0.00782464	0.0487018	NA	0.0491814
on.gene.LG22.2120001	NA	0.0087421	NA	NA	NA	0.000285378	0.000196077	NA	NA	0.000102086	0.0222387	NA	NA	NA	0.0151752
on.gene.LG22.283	NA	0.04327	0.00868119	NA	0.00205422	NA	NA	NA	0.0100645	NA	0.00653276	NA	NA	0.0255686	NA
on.gene.LG22.294	NA	0.0188051	NA	NA	NA	0.00345828	NA	0.0301946	0.0015656	0.00413953	0.0276807	NA	NA	NA	NA
on.gene.LG22.340	NA	0.000458543	0.00082063	NA	NA	0.0019937	NA	NA	0.0311724	NA	NA	NA	0.0333692	0.0191966	NA
on.gene.LG22.4050001	NA	0.0469859	0.0135877	NA	0.000146566	NA	NA	NA	NA	0.000203639	NA	0.0013204	NA	NA	0.00445456
on.gene.LG22.428	NA	0.0306509	NA	0.0120895	NA	NA	NA	NA	NA	0.00791651	0.00252111	NA	NA	0.000710709	0.0001392
on.gene.LG22.48	NA	0.000508184	NA	NA	NA	NA	NA	0.0470309	0.000747544	0.000457368	0.0315943	NA	0.0378794	NA	NA
on.gene.LG22.544	NA	0.000264512	0.0472928	0.00617303	NA	0.0208655	NA	0.00126765	NA	NA	NA	0.000501016	NA	NA	NA
on.gene.LG22.552	NA	0.0266547	NA	0.0283933	NA	NA	NA	0.00253968	NA	NA	NA	0.000115977	0.00102899	0.0139534	NA
on.gene.LG22.605	NA	0.000331218	NA	NA	0.0378902	NA	NA	0.00123122	NA	NA	NA	0.019107	NA	0.0107782	0.00164577
on.gene.LG22.625	NA	0.0306061	NA	0.0149742	NA	0.0167671	NA	NA	NA	NA	NA	0.022418	0.0377322	NA	0.0370575
on.gene.LG22.656	NA	0.000535716	NA	0.00718851	NA	NA	NA	0.0490249	NA	0.00239318	NA	NA	NA	0.0336481	0.000181666
on.gene.LG23.1120001	NA	0.030343	0.0499032	NA	NA	NA	NA	NA	0.00585563	0.0368248	0.0125749	NA	0.00251833	NA	NA
on.gene.LG23.179	NA	0.0185494	NA	NA	NA	NA	NA	0.00141492	0.0436616	0.0471397	0.0188652	NA	0.00579026	NA	NA
on.gene.LG23.191	NA	0.0287167	NA	0.0327321	NA	0.00930745	NA	NA	0.000321552	0.0208461	NA	0.0461931	NA	NA	NA
on.gene.LG23.222	NA	0.0020293	NA	NA	NA	NA	NA	0.000267018	0.00402448	0.00742115	0.00957548	NA	0.00282089	NA	NA
on.gene.LG23.241	NA	0.000855773	0.000112104	0.0451233	NA	0.000110222	NA	NA	NA	NA	NA	NA	0.000112888	0.000155167	NA
on.gene.LG23.261	NA	0.00402043	NA	NA	0.0299193	0.00802953	NA	0.0297206	NA	0.00559291	NA	NA	0.0038596	NA	NA
on.gene.LG23.415	NA	0.000436825	NA	NA	0.0135008	NA	NA	NA	0.000100636	0.000417915	0.0130158	NA	0.00524371	NA	NA
on.gene.LG23.424	NA	0.000861444	0.0362966	0.0448411	NA	NA	0.0176862	0.000115744	NA	NA	NA	0.00193813	NA	NA	NA
on.gene.LG23.436	NA	0.000676353	NA	0.0417969	NA	NA	0.0253265	0.0110211	0.000120939	NA	NA	0.000706936	NA	NA	NA
on.gene.LG23.437	NA	0.0018549	NA	NA	NA	NA	NA	0.000280144	NA	NA	NA	0.00630345	0.00683445	0.000455882	0.00138875
on.gene.LG23.562	NA	0.048518	NA	NA	0.00317137	NA	NA	0.000208418	NA	NA	NA	0.00207041	NA	0.033436	0.0075148
on.gene.LG3.186	NA	0.00322917	NA	0.0102378	NA	0.0338458	0.0165531	NA	0.00326754	NA	NA	0.00684731	NA	NA	NA
on.gene.LG3.220	NA	0.00334467	NA	0.00145557	NA	NA	NA	0.0139034	NA	NA	0.00010312	NA	NA	0.0431736	0.00940167
on.gene.LG3.224	NA	0.00580323	0.000810358	NA	NA	NA	NA	0.03763	NA	0.00133884	NA	NA	NA	0.0466728	0.0374943
on.gene.LG3.2560001	NA	0.000221996	NA	NA	0.000602573	0.00169383	NA	NA	0.0256731	NA	0.000355002	NA	0.0195187	NA	NA
on.gene.LG4.184	NA	0.00373384	NA	0.0263713	NA	0.00583852	0.00295574	NA	0.00326163	NA	NA	0.00581048	NA	NA	NA
on.gene.LG4.264	NA	0.000107582	NA	NA	0.0221739	0.00653945	NA	0.00014321	0.0429558	NA	NA	NA	0.0037959	NA	NA
on.gene.LG4.265	NA	0.024248	NA	NA	NA	NA	NA	0.00221444	0.0201715	0.0182371	0.00340367	NA	0.00453112	NA	NA
on.gene.LG4.281	NA	0.000803958	NA	NA	0.00191456	NA	NA	0.00271439	NA	NA	NA	0.00120617	0.0448804	NA	0.0208133
on.gene.LG4.29	NA	0.00773055	NA	NA	NA	0.000683492	NA	0.00375268	NA	NA	NA	0.040705	NA	0.0124168	0.0128356
on.gene.LG4.496	NA	0.0203135	NA	0.000744827	NA	NA	0.0011048	NA	0.020533	NA	0.0275627	NA	0.0300507	NA	NA
on.gene.LG4.498	NA	0.0163451	0.0159538	0.026772	NA	NA	0.0363734	0.00372543	0.0147411	NA	NA	NA	NA	NA	NA
on.gene.LG4.731	NA	0.000153349	0.0175656	NA	NA	0.0135989	NA	NA	NA	NA	NA	NA	0.00145164	0.00235999	0.0277502
on.gene.LG4.740	NA	0.00595148	0.0330222	0.0318044	NA	NA	NA	0.00229379	NA	NA	NA	NA	NA	0.000315935	0.000572187
on.gene.LG4.775	NA	0.00109144	NA	NA	NA	0.0046726	0.000776658	NA	NA	0.0429584	0.0382837	NA	NA	NA	0.00850161
on.gene.LG4.810	NA	0.0265835	0.0273485	0.0110284	NA	0.000408129	NA	0.0336296	NA	NA	NA	0.000584828	NA	NA	NA
on.gene.LG4.811	NA	0.00017286	NA	NA	0.00118285	0.0218484	NA	0.00972255	0.0059328	NA	0.00275676	NA	NA	NA	NA
on.gene.LG4.843	NA	0.000133542	0.0317385	NA	NA	NA	0.00611671	0.0135362	NA	0.000321472	0.0185928	NA	NA	NA	NA
on.gene.LG4.844	NA	0.00549835	NA	NA	0.0332162	NA	0.0219858	NA	NA	0.0293075	NA	0.000115237	NA	NA	0.00197353
on.gene.LG4.939	NA	0.00124302	NA	NA	NA	0.00508186	NA	0.00235946	0.00334024	NA	0.00132257	NA	0.000207912	NA	NA
on.gene.LG5.1015	NA	0.00060112	NA	NA	0.00542266	NA	0.0480939	0.00114272	NA	NA	NA	NA	NA	0.0157206	0.0045975
on.gene.LG5.10200001	NA	0.0302682	0.0311642	NA	0.0332214	NA	NA	NA	NA	0.0279316	NA	0.0463113	NA	NA	0.022762
on.gene.LG5.121	NA	0.0101842	NA	NA	NA	NA	0.0317739	0.000576633	NA	0.0036409	0.0338675	NA	NA	0.0276602	NA
on.gene.LG5.132	NA	0.0213101	NA	NA	0.000193417	NA	NA	0.00337336	0.0183193	NA	0.0219096	NA	0.03656	NA	NA
on.gene.LG5.166	NA	0.0177301	NA	0.0213009	NA	0.0289847	NA	0.0218393	NA	NA	NA	0.0147331	NA	0.00035654	NA
on.gene.LG5.181	NA	0.00388361	0.00401744	0.000231306	NA	NA	NA	0.0248447	NA	0.000977471	NA	NA	NA	NA	0.0403444
on.gene.LG5.197	NA	0.00161956	NA	NA	0.00143417	NA	0.000966504	NA	NA	NA	NA	NA	0.0346076	0.0382511	0.000578621
on.gene.LG5.2230001	NA	0.016659	NA	NA	NA	NA	NA	0.0146457	NA	0.0393021	0.0350854	NA	NA	0.0117756	0.00776074
on.gene.LG5.520	NA	0.00406153	0.0018337	0.00350969	NA	0.0230884	NA	0.000849169	NA	NA	NA	0.00216472	NA	NA	NA
on.gene.LG5.564	NA	0.00391716	NA	0.00149579	NA	NA	0.00868288	NA	0.00123623	0.0130575	NA	NA	0.000142809	NA	NA
on.gene.LG5.643	NA	0.000196249	NA	NA	0.0155768	NA	0.0302458	NA	NA	NA	NA	0.00244782	0.00532501	NA	0.000315488
on.gene.LG5.7470001	NA	0.014097	NA	NA	0.00438025	NA	0.0271974	0.0339434	NA	NA	NA	0.0497807	NA	NA	0.0412464
on.gene.LG5.771	NA	0.000149847	NA	NA	0.00248199	0.00767415	NA	0.0178413	NA	0.000413848	NA	NA	NA	NA	0.0384022
on.gene.LG5.773	NA	0.00899531	NA	NA	0.00421644	0.0248202	NA	NA	NA	0.00118776	0.0137513	NA	0.000776494	NA	NA
on.gene.LG5.776	NA	0.00122603	0.00782471	NA	NA	NA	NA	NA	NA	0.0282531	0.000152833	NA	NA	0.030448	0.000112047
on.gene.LG5.797	NA	0.00746319	NA	NA	0.00237892	NA	0.0347178	NA	NA	NA	NA	0.000705103	0.0128231	NA	0.045881
on.gene.LG5.800	NA	0.00108136	NA	0.00347959	NA	NA	0.000235508	NA	0.0171815	0.00318438	NA	NA	NA	0.0382702	NA
on.gene.LG5.872	NA	0.00486165	NA	NA	0.000419574	NA	0.00671002	0.0243627	NA	NA	NA	NA	NA	0.0399896	0.00517177
on.gene.LG5.934	NA	0.0131805	0.00517922	NA	0.000161677	NA	NA	NA	0.0495609	NA	0.0242015	NA	0.00485671	NA	NA
on.gene.LG5.998	NA	0.000333138	NA	NA	0.00239827	NA	NA	0.0161646	NA	NA	0.0450671	NA	0.000162325	0.00968907	NA
on.gene.LG6.1056	NA	0.00146711	NA	0.00819437	NA	NA	0.0150219	0.0363657	0.0017586	NA	NA	0.0304071	NA	NA	NA
on.gene.LG6.10750001	NA	0.00241916	0.0107306	NA	NA	NA	0.00247541	NA	NA	0.00192172	NA	NA	0.000444084	NA	0.0415307
on.gene.LG6.108	NA	0.00486364	NA	0.0146199	NA	NA	0.0476377	0.0306639	0.01185	NA	NA	0.0388474	NA	NA	NA
on.gene.LG6.168	NA	0.00493585	0.0115095	0.000605508	NA	NA	NA	0.0344968	NA	0.000475801	NA	NA	NA	NA	0.00732491
on.gene.LG6.178	NA	0.000149742	NA	0.0496537	NA	0.0256081	NA	0.000115581	NA	NA	NA	NA	0.021701	NA	0.0482637
on.gene.LG6.21	NA	0.000107582	NA	0.0030454	NA	0.0295258	NA	NA	NA	NA	NA	0.000928737	0.0334172	NA	0.00430064
on.gene.LG6.217	NA	0.0492761	NA	0.00292419	NA	NA	0.0218427	NA	0.00708562	NA	0.000524723	NA	0.00361859	NA	NA
on.gene.LG6.311	NA	0.00235446	NA	NA	0.000684371	NA	NA	0.00532929	0.00392366	0.0242932	NA	NA	0.0478486	NA	NA
on.gene.LG6.578	NA	0.0248585	NA	NA	0.00163599	NA	NA	0.0171105	NA	NA	NA	0.00042926	NA	0.000490607	0.000448531
on.gene.LG6.675	NA	0.0133281	NA	NA	NA	NA	NA	0.00617221	NA	0.0138989	0.0214199	NA	NA	0.0296383	0.0308867
on.gene.LG6.698	NA	0.00306537	NA	NA	0.000317369	0.0232153	NA	NA	0.000168308	NA	0.00279361	NA	0.0427743	NA	NA
on.gene.LG6.703	NA	0.0110824	NA	0.00843962	NA	0.00626146	NA	NA	NA	NA	NA	0.00456453	0.00284163	NA	0.00472136
on.gene.LG6.731	NA	0.0288846	0.0165026	NA	0.0160054	0.0409802	NA	NA	NA	NA	0.0391505	NA	NA	NA	0.032268
on.gene.LG6.76	NA	0.00927234	NA	NA	0.00487539	0.00129443	NA	NA	0.0208047	NA	0.00164313	NA	0.00478037	NA	NA
on.gene.LG6.79	NA	0.00139207	0.0189424	0.0036193	NA	NA	NA	0.000704801	NA	0.0292801	0.0093318	NA	NA	NA	NA
on.gene.LG6.824	NA	0.0094458	NA	NA	NA	0.0184993	NA	NA	NA	0.000715883	NA	0.0295433	NA	0.0332461	0.000390776
on.gene.LG6.847	NA	0.00122661	0.00613022	NA	NA	NA	NA	0.0114517	NA	0.000173097	0.00730005	NA	NA	0.0140567	NA
on.gene.LG6.853	NA	0.0120222	0.00217942	0.0055887	NA	NA	NA	NA	NA	NA	NA	0.0116324	NA	0.0103323	0.00118052
on.gene.LG6.963	NA	0.0042148	0.0160165	NA	NA	NA	NA	NA	0.0132227	0.000493186	0.0164441	NA	0.047736	NA	NA
on.gene.LG6.977	NA	0.000316351	NA	NA	0.000521941	NA	NA	0.00828933	NA	NA	NA	0.000300158	0.0328091	0.0066415	NA
on.gene.LG7.1065	NA	0.00184227	NA	NA	NA	NA	NA	0.000544284	0.00333184	0.00695225	0.00332934	NA	0.00244489	NA	NA
on.gene.LG7.1076	NA	0.0109791	NA	NA	NA	NA	NA	0.00345748	NA	0.010922	0.0255004	NA	NA	0.0049972	0.00808779
on.gene.LG7.119	NA	0.00536889	NA	0.00150965	NA	NA	0.047111	0.000103212	NA	NA	0.00070162	NA	0.0201944	NA	NA
on.gene.LG7.1202	NA	0.00741809	NA	NA	0.00481639	0.0133182	NA	0.021918	NA	0.0423037	0.0129042	NA	NA	NA	NA
on.gene.LG7.1276	NA	0.00246685	0.0320269	0.0196845	NA	0.0195828	NA	0.00108118	NA	NA	NA	0.000547683	NA	NA	NA
on.gene.LG7.1295	NA	0.000253778	NA	NA	0.0031388	NA	NA	0.000784062	0.00219033	0.000185668	0.000244752	NA	NA	NA	NA
on.gene.LG7.1384	NA	0.00267587	NA	NA	0.0287223	NA	NA	0.000143352	NA	NA	NA	0.014473	NA	0.0112324	0.0394782
on.gene.LG7.269	NA	0.0190489	0.0156548	NA	NA	NA	0.0278807	0.000386483	0.00149423	NA	NA	0.0200256	NA	NA	NA
on.gene.LG7.278	NA	0.0173065	NA	NA	0.00214833	0.000505115	0.00784411	NA	NA	NA	0.00322973	NA	NA	NA	0.0292821
on.gene.LG7.281	NA	0.000327813	NA	NA	0.000280898	NA	0.000212924	0.00916089	NA	NA	NA	NA	NA	0.00719487	0.00676759
on.gene.LG7.305	NA	0.043322	NA	0.0391669	NA	NA	0.0460998	NA	0.00719795	NA	0.00500018	NA	NA	0.00992023	NA
on.gene.LG7.385	NA	0.00234412	NA	0.0153442	NA	0.00246583	NA	NA	NA	0.00862639	NA	NA	0.00984494	NA	0.0492535
on.gene.LG7.413	NA	0.0105428	NA	NA	NA	NA	NA	0.00349417	NA	NA	NA	0.000920798	0.00583862	0.0198738	0.0264318
on.gene.LG7.499	NA	0.0173631	NA	NA	NA	0.000744335	NA	0.000323168	0.0218766	NA	0.0272393	NA	0.020474	NA	NA
on.gene.LG7.667	NA	0.0209511	0.000373762	0.0310065	NA	0.00180504	NA	NA	NA	NA	NA	0.000366873	NA	0.0249569	NA
on.gene.LG7.669	NA	0.00833928	NA	0.0104924	NA	NA	0.00266723	NA	0.0319504	NA	0.0276172	NA	0.0066175	NA	NA
on.gene.LG7.776	NA	0.00053012	NA	NA	0.00163413	0.00139459	0.00878128	NA	NA	NA	0.00895488	NA	NA	NA	0.0322233
on.gene.LG7.846	NA	0.000298351	NA	NA	NA	0.00873118	0.0011048	0.0111186	NA	NA	NA	0.0286325	NA	NA	0.0397962
on.gene.LG7.870	NA	0.0018168	0.0417758	NA	NA	NA	NA	0.000170801	NA	0.000685339	0.00440328	NA	NA	0.04473	NA
on.gene.LG7.915	NA	0.00286068	NA	NA	0.000347358	NA	0.00380036	NA	NA	NA	NA	0.00802841	0.0395576	NA	0.0118508
on.gene.LG7.950	NA	0.0119351	NA	NA	NA	NA	NA	0.00333013	0.00242919	0.000963531	0.003271	NA	0.000632203	NA	NA
on.gene.LG7.960001	NA	0.044232	NA	0.00541834	NA	0.000572043	NA	NA	NA	NA	NA	0.00450776	0.00066954	NA	0.00693054
on.gene.LG7.998	NA	0.0480537	0.00028917	NA	NA	0.0320388	0.000169915	NA	0.000229471	NA	0.00268748	NA	NA	NA	NA
on.gene.LG8-24.105	NA	0.0212906	0.0366091	NA	NA	NA	NA	0.0302722	0.020766	NA	0.000813263	NA	0.000488331	NA	NA
on.gene.LG8-24.175	NA	0.000981776	NA	NA	0.00096991	NA	0.0245721	0.0039543	NA	NA	NA	NA	0.00167142	NA	0.013298
on.gene.LG8-24.195	NA	0.0101584	NA	0.0461791	NA	NA	0.0376894	NA	0.0051865	NA	0.00476726	NA	0.00286987	NA	NA
on.gene.LG8-24.252	NA	0.023449	NA	NA	NA	0.0060904	NA	NA	0.0464488	0.0219973	0.0321896	NA	0.0315309	NA	NA
on.gene.LG8-24.256	NA	0.0202604	NA	0.0243638	NA	NA	NA	NA	0.000310383	0.0447286	0.000272236	NA	0.0114886	NA	NA
on.gene.LG8-24.366	NA	0.0325351	NA	0.0200915	NA	0.0190912	NA	NA	NA	0.00285959	NA	0.0011505	0.00133662	NA	NA
on.gene.LG8-24.423	NA	0.0242733	NA	NA	NA	NA	0.00276976	NA	NA	NA	NA	0.0448722	0.00122344	0.000833649	0.00754081
on.gene.LG8-24.620	NA	0.000552774	NA	0.0207508	NA	0.0288594	NA	NA	NA	NA	NA	0.000338513	0.0496507	NA	0.0412564
on.gene.LG8-24.6270001	NA	0.00195497	NA	NA	0.000199853	0.00357646	NA	NA	NA	0.0101078	0.000156165	NA	0.0420647	NA	NA
on.gene.LG8-24.669	NA	0.0399305	NA	NA	NA	NA	NA	0.00762786	0.00914434	0.00301659	0.0156595	NA	0.00338085	NA	NA
on.gene.LG8-24.769	NA	0.0036989	NA	NA	0.00297085	NA	0.0467157	NA	NA	0.00105919	NA	NA	0.00015758	NA	0.032036
on.gene.LG8-24.787	NA	0.00212251	NA	0.00693334	NA	0.0280156	NA	NA	NA	NA	NA	0.00572081	0.00428197	NA	0.00102127
on.gene.LG9.120	NA	0.00259947	NA	NA	0.000736398	0.00211591	NA	NA	NA	NA	0.00399696	NA	0.000196364	0.0324172	NA
on.gene.LG9.131	NA	0.00336695	0.000976773	0.000132812	NA	NA	NA	0.0100444	NA	0.00305753	0.000752719	NA	NA	NA	NA
on.gene.LG9.138	NA	0.000489753	NA	NA	0.0010394	NA	NA	0.00379109	NA	NA	NA	0.00851527	0.000678719	0.000339724	NA
on.gene.LG9.224	NA	0.000485153	0.0141094	NA	NA	NA	NA	0.0308829	NA	0.0035616	NA	NA	NA	0.0245294	0.000164249
on.gene.LG9.276	NA	0.0151223	NA	0.00180683	NA	0.00959595	NA	NA	NA	NA	NA	0.0453005	0.0420908	NA	0.0113219
on.gene.LG9.3030001	NA	0.00111333	NA	NA	0.000660338	NA	0.0308282	NA	NA	0.0295322	NA	NA	0.00756969	NA	0.0238158
on.gene.LG9.431	NA	0.0186566	NA	0.0105221	NA	0.0121378	NA	NA	NA	NA	NA	0.000467083	0.0408852	NA	0.00287733
on.gene.LG9.720001	NA	0.0144388	0.0406817	0.00010978	NA	NA	NA	NA	NA	0.00150274	NA	0.0122005	NA	NA	0.00184068
on.gene.UNK1.105	NA	0.0121125	NA	0.003397	NA	NA	0.00412831	NA	0.0213457	NA	0.0026425	NA	0.00241582	NA	NA
on.gene.UNK1.122	NA	0.0150812	NA	0.0186645	NA	0.0243617	NA	NA	NA	NA	NA	0.0117002	0.000836262	NA	0.000890054
on.gene.UNK1.3	NA	0.000660264	NA	NA	0.0207545	0.0341982	NA	0.0193175	0.00161615	0.0369229	NA	NA	NA	NA	NA
on.gene.UNK10.48	NA	0.0118352	NA	0.00483774	NA	0.00119043	0.0127503	NA	0.0202354	NA	NA	0.00169809	NA	NA	NA
on.gene.UNK102.14	NA	0.00180119	0.0372088	0.000881182	NA	NA	NA	0.034698	NA	NA	0.0499899	NA	NA	NA	0.0202942
on.gene.UNK105.10	NA	0.0396679	NA	NA	NA	NA	NA	0.0157969	NA	NA	NA	0.00290064	0.00146104	0.00925618	0.0137012
on.gene.UNK11.13	NA	0.00514306	NA	NA	NA	NA	NA	0.0150358	0.0411968	0.00508885	0.0140819	NA	0.00242133	NA	NA
on.gene.UNK116.2	NA	0.0183582	NA	NA	0.0063606	NA	0.0455065	0.00670976	NA	NA	NA	0.0131148	NA	0.0475215	NA
on.gene.UNK120.7	NA	0.0238093	NA	NA	NA	0.00744728	NA	0.00516207	NA	0.045587	0.0188531	NA	0.0072954	NA	NA
on.gene.UNK13.34	NA	0.000148372	0.043085	0.000139876	NA	NA	NA	0.0269196	NA	0.00339517	NA	NA	NA	NA	0.012227
on.gene.UNK137.3	NA	0.000101418	NA	NA	0.0142032	0.0160447	NA	0.0270115	NA	0.0254751	NA	NA	NA	NA	0.0389168
on.gene.UNK141.1	NA	0.00363241	NA	NA	0.0194064	NA	NA	0.000852882	NA	NA	NA	0.00242889	NA	0.031057	0.0452645
on.gene.UNK141.4	NA	0.00109984	NA	NA	NA	NA	NA	0.0106746	NA	NA	NA	0.000620753	0.00167608	0.0234331	0.00155562
on.gene.UNK155.10	NA	0.00301407	NA	NA	0.0426311	NA	0.048188	NA	NA	NA	NA	0.00180511	0.0021564	NA	0.00211603
on.gene.UNK160.7	NA	0.000287017	NA	NA	0.00928735	NA	0.0342091	NA	NA	NA	NA	0.0192655	0.0497675	NA	0.000886657
on.gene.UNK167.3	NA	0.000210729	0.000662014	NA	NA	NA	0.00486925	0.00111142	0.009605	NA	NA	NA	0.000770338	NA	NA
on.gene.UNK17.18	NA	0.00135855	NA	NA	NA	NA	0.00363478	0.000777669	NA	NA	NA	NA	0.00429327	0.0315404	0.023874
on.gene.UNK176.10	NA	0.0467354	NA	NA	0.028412	NA	0.0445983	NA	NA	NA	NA	0.015487	0.0212665	NA	0.0428964
on.gene.UNK185.1	NA	0.0219965	0.00623194	0.0122764	NA	0.00543215	NA	0.00515666	NA	NA	NA	0.00584609	NA	NA	NA
on.gene.UNK186.4	NA	0.0218105	NA	NA	0.0103551	0.0256914	NA	0.0115278	NA	0.0239191	0.0347987	NA	NA	NA	NA
on.gene.UNK19.19	NA	0.0414191	0.0207261	NA	NA	NA	NA	0.00297447	NA	0.000432918	NA	NA	NA	0.000249786	0.00411599
on.gene.UNK196.6	NA	0.0309735	0.000681387	NA	NA	0.0313947	NA	0.00118614	0.00595217	NA	NA	0.000879935	NA	NA	NA
on.gene.UNK2.69	NA	0.000685463	0.00140806	0.00754643	NA	NA	NA	0.0173974	NA	0.00021893	NA	NA	NA	0.000164225	NA
on.gene.UNK20.41	NA	0.0152047	NA	NA	NA	NA	NA	0.0100281	NA	NA	NA	0.0379958	0.00571103	0.00172292	0.00154315
on.gene.UNK20.5	NA	0.0310229	0.0341543	0.00254516	NA	NA	0.0485593	NA	NA	0.00101738	NA	NA	0.00221975	NA	NA
on.gene.UNK204.13	NA	0.00480777	NA	NA	0.0417515	0.00133008	NA	NA	0.0055781	NA	0.0207626	NA	0.0145956	NA	NA
on.gene.UNK213.4	NA	0.000771192	NA	NA	0.00472155	0.0472682	NA	NA	0.00229515	NA	0.00709335	NA	0.0201927	NA	NA
on.gene.UNK237.15	NA	0.00365313	NA	NA	0.00427782	NA	0.0332958	0.00342621	NA	NA	NA	NA	NA	0.0345054	0.032788
on.gene.UNK239.5	NA	0.000544386	NA	NA	0.0398542	NA	NA	0.00226513	NA	NA	NA	0.0424856	NA	0.0349619	0.0066392
on.gene.UNK241.7	NA	0.0390029	NA	NA	NA	NA	NA	0.00637306	NA	NA	NA	0.0462663	0.0400221	0.00714936	0.0260539
on.gene.UNK248.1	NA	0.0148812	NA	NA	0.00945086	0.0347143	NA	0.000355584	0.000683252	NA	0.0276579	NA	NA	NA	NA
on.gene.UNK249.2	NA	0.0162387	NA	0.00498162	NA	NA	NA	NA	NA	0.00320611	NA	0.00862513	0.0381203	NA	0.0227173
on.gene.UNK252.4	NA	0.00470269	NA	NA	0.0105965	0.0185733	0.026137	NA	NA	NA	0.00534244	NA	NA	NA	0.00710446
on.gene.UNK27.41	NA	0.0188762	NA	NA	0.00397513	NA	0.0139547	NA	NA	NA	NA	0.00236807	0.007641	NA	0.029633
on.gene.UNK277.8	NA	0.000981448	NA	NA	0.000227903	NA	0.00286119	0.0100862	NA	NA	NA	NA	0.00126842	NA	0.00474721
on.gene.UNK28.2	NA	0.0409521	NA	NA	0.021536	NA	NA	0.000288184	NA	NA	NA	0.000333405	0.00231747	0.00233881	NA
on.gene.UNK294.7	NA	0.000138728	NA	NA	NA	0.0113855	NA	NA	NA	0.00204683	NA	0.0231377	0.023567	NA	0.000122585
on.gene.UNK3.10	NA	0.031536	0.000153776	0.0175085	NA	NA	NA	0.000112802	NA	NA	0.0245985	NA	0.0026057	NA	NA
on.gene.UNK3.9	NA	0.00100608	NA	NA	0.00121619	NA	0.000125237	0.00633517	NA	NA	NA	0.000177247	NA	0.000926802	NA
on.gene.UNK30.380001	NA	0.000221078	0.000961847	NA	0.0320148	NA	0.012621	NA	NA	0.00858193	NA	0.000762732	NA	NA	NA
on.gene.UNK305.6	NA	0.0383356	NA	0.000751171	NA	NA	NA	0.000663507	NA	NA	NA	0.00831345	0.0175426	0.00229521	NA
on.gene.UNK33.19	NA	0.00888508	NA	0.0171302	NA	NA	NA	0.0206461	NA	0.0407428	0.0157798	NA	NA	NA	0.0187532
on.gene.UNK334.4	NA	0.00618657	0.0152903	NA	NA	0.00238741	0.00144528	NA	0.0227501	NA	NA	0.0309548	NA	NA	NA
on.gene.UNK334.5	NA	0.0330992	NA	NA	NA	0.000627719	0.0398373	NA	NA	NA	NA	0.00396356	NA	0.00792436	0.000240367
on.gene.UNK356.5	NA	0.000665309	0.0290293	0.00740869	NA	NA	NA	0.00141152	NA	NA	NA	0.00603098	NA	NA	0.0330824
on.gene.UNK361.9	NA	0.0336434	NA	NA	0.00326634	NA	NA	0.0252683	NA	NA	0.00384589	NA	0.0355453	0.000522928	NA
on.gene.UNK3847.1	NA	0.0261642	0.0310713	NA	0.00536218	0.000848709	NA	NA	NA	NA	0.0033438	NA	NA	NA	0.000427731
on.gene.UNK39.33	NA	0.00764633	NA	NA	0.0410904	0.00689946	NA	0.00351823	NA	NA	0.0239773	NA	0.00257882	NA	NA
on.gene.UNK397.3	NA	0.00710794	0.00367585	NA	NA	NA	NA	0.00811918	NA	0.000180842	NA	NA	NA	0.0135867	0.0237879
on.gene.UNK4.37	NA	0.0151475	NA	NA	0.003187	0.0418261	NA	0.000133481	0.00131682	NA	0.0139819	NA	NA	NA	NA
on.gene.UNK4.59	NA	0.00879231	NA	NA	NA	NA	NA	0.00953495	0.0205809	0.00576226	0.00423066	NA	0.0111709	NA	NA
on.gene.UNK43.12	NA	0.000766684	0.013137	0.00142089	NA	NA	NA	0.00365076	NA	NA	0.020945	NA	NA	NA	0.0303966
on.gene.UNK5.36	NA	0.0435418	NA	NA	0.00605006	NA	NA	NA	NA	0.0129013	0.0455602	NA	NA	0.00378314	0.0117237
on.gene.UNK5.77	NA	0.0489166	NA	0.00923682	NA	NA	NA	0.000467996	NA	NA	0.043796	NA	0.000770338	0.0333345	NA
on.gene.UNK504.1	NA	0.0253332	NA	NA	NA	NA	0.000369963	NA	0.00619853	NA	0.0067175	NA	0.0437564	0.00370683	NA
on.gene.UNK51.7	NA	0.000782771	0.000196951	0.0199324	NA	0.00123121	NA	NA	NA	NA	NA	NA	0.0117602	0.00301345	NA
on.gene.UNK519.1	NA	0.0264142	0.000410562	NA	0.047769	NA	NA	NA	NA	0.0323887	0.00822832	NA	NA	NA	0.017482
on.gene.UNK520.1	NA	0.00336695	0.0424337	0.0136232	NA	0.0415914	NA	0.00586247	NA	NA	NA	0.00719483	NA	NA	NA
on.gene.UNK54.16	NA	0.0199222	NA	NA	0.000429341	0.00806495	NA	0.000358604	NA	0.00659414	NA	NA	0.00186688	NA	NA
on.gene.UNK55.15	NA	0.00176573	NA	NA	0.000175029	NA	0.0377177	0.000247861	NA	NA	NA	0.000996353	NA	0.0474632	NA
on.gene.UNK567.1	NA	0.00725538	NA	NA	NA	0.0168521	0.00743649	0.000459501	NA	NA	0.00102937	NA	NA	NA	0.000309465
on.gene.UNK62.11	NA	0.000574032	0.00971199	0.0320709	NA	NA	NA	0.00748555	NA	NA	0.00054173	NA	NA	0.000233169	NA
on.gene.UNK64.18	NA	0.00382307	NA	NA	0.0373871	NA	NA	0.0011626	NA	0.00366203	0.00750659	NA	NA	0.0486155	NA
on.gene.UNK70.12	NA	0.0198583	NA	0.0132582	NA	NA	NA	0.000788309	NA	NA	NA	0.00205978	0.0247788	0.0144175	NA
on.gene.UNK71.15	NA	0.000971339	0.0126253	0.00164406	NA	NA	NA	0.00363615	NA	0.0143152	0.0032576	NA	NA	NA	NA
on.gene.UNK75.24	NA	0.00246653	0.00288419	0.0320671	NA	NA	NA	NA	NA	0.00622168	NA	NA	NA	0.00117646	0.0197443
on.gene.UNK75.3	NA	0.00393772	NA	NA	0.000556325	0.0186483	NA	0.00608583	NA	0.00162537	0.0029415	NA	NA	NA	NA
on.gene.UNK8.23	NA	0.00899497	NA	NA	0.0214811	0.0337952	NA	0.000267127	NA	NA	NA	NA	0.000207932	0.0340386	NA
on.gene.UNK80.10	NA	0.00757269	NA	NA	0.0018455	0.00366747	NA	0.00310936	NA	0.00486126	0.00897054	NA	NA	NA	NA
on.gene.UNK81.3	NA	0.00115825	0.0453475	0.0127697	NA	NA	0.00430062	0.00233205	0.0001284	NA	NA	NA	NA	NA	NA
on.gene.UNK86.9	NA	0.0324554	NA	NA	NA	NA	0.0107163	0.0206461	0.0340465	0.0282195	0.034277	NA	NA	NA	NA
on.gene.UNK89.24	NA	0.00543618	NA	0.0132105	NA	NA	NA	0.0190081	NA	NA	0.0183716	NA	NA	0.00177404	0.000163188
on.gene.UNK90.9	NA	0.0255004	NA	NA	0.000118289	NA	0.000583688	NA	NA	NA	NA	0.0076091	0.0177851	NA	0.0357723
on.gene.UNK91.90001	NA	0.0215639	NA	NA	0.0431002	NA	NA	0.00342621	NA	NA	NA	0.000488679	0.0408472	NA	0.00256092
on.gene.UNK95.19	NA	0.0403921	NA	NA	NA	NA	0.022431	NA	0.0026917	0.0395422	NA	0.0207786	NA	0.00688186	NA
on.gene.UNK951.1	NA	0.000778725	NA	NA	0.0230783	0.0474445	NA	0.00076448	0.0265787	NA	NA	NA	0.0485387	NA	NA
on.gene.UNK98.2	NA	0.0260524	NA	NA	0.00817065	NA	NA	0.0117305	0.0183993	0.0423642	0.0423393	NA	NA	NA	NA
on.gene.LG1.4240001	NA	NA	0.0417758	0.00130934	0.0322583	NA	NA	NA	0.0045184	0.00123497	0.0127095	NA	NA	NA	NA
on.gene.LG1.58	NA	NA	0.0161908	NA	NA	0.00538083	0.00528377	0.00175175	0.000680322	NA	NA	0.000578413	NA	NA	NA
on.gene.LG1.674	NA	NA	0.00249904	0.0129856	NA	NA	NA	0.0242322	NA	0.000415531	0.00503538	NA	0.0182308	NA	NA
on.gene.LG10.267	NA	NA	0.025445	NA	NA	0.00935116	0.0034017	0.0461935	0.0091478	NA	NA	0.0227098	NA	NA	NA
on.gene.LG10.459	NA	NA	0.0449713	0.00655877	NA	0.0216001	NA	NA	NA	NA	NA	NA	0.0221176	0.0466677	0.00799152
on.gene.LG11.327	NA	NA	0.0310206	NA	NA	0.0201643	NA	0.000235758	NA	NA	NA	0.000117874	0.00832624	0.0136193	NA
on.gene.LG11.563	NA	NA	0.0271595	NA	0.00869089	NA	NA	NA	0.008589	0.0323887	NA	0.0165414	NA	0.0201984	NA
on.gene.LG11.587	NA	NA	0.000276787	0.0106493	NA	NA	NA	0.00192345	NA	NA	0.000117168	0.0280319	NA	NA	0.00410266
on.gene.LG11.723	NA	NA	0.0119595	NA	NA	NA	0.0159638	0.0209561	0.0363158	0.00190513	NA	NA	0.00336261	NA	NA
on.gene.LG12.373	NA	NA	0.00166848	NA	NA	0.0420203	0.0362016	0.0069692	0.000624266	NA	NA	0.000143502	NA	NA	NA
on.gene.LG12.406	NA	NA	0.0290567	NA	NA	0.000475727	NA	0.00016488	NA	NA	0.00157392	0.0204147	NA	0.00377913	NA
on.gene.LG12.431	NA	NA	0.000337924	0.011515	NA	NA	0.000385067	0.0117316	0.0152565	NA	NA	0.000528703	NA	NA	NA
on.gene.LG13.302	NA	NA	0.0453475	0.00068094	NA	NA	NA	NA	NA	0.0102746	0.000105602	NA	NA	0.0175802	0.000208509
on.gene.LG13.505	NA	NA	0.000805981	NA	0.0227075	NA	NA	NA	0.000368297	0.00135694	NA	0.0486981	NA	NA	0.00709874
on.gene.LG13.511	NA	NA	0.0246791	0.0473825	0.00138875	NA	NA	NA	0.00952863	0.0162306	NA	0.00102994	NA	NA	NA
on.gene.LG14.206	NA	NA	0.044708	NA	0.00226418	NA	0.00245898	NA	NA	0.00173619	NA	0.00293059	0.0439443	NA	NA
on.gene.LG14.249	NA	NA	0.00428513	NA	0.000881121	0.0353423	NA	NA	0.00453894	NA	0.0447819	NA	NA	0.012779	NA
on.gene.LG14.307	NA	NA	0.0338842	0.0241862	0.00671641	NA	NA	NA	NA	0.00271052	0.00309232	0.000498681	NA	NA	NA
on.gene.LG14.847	NA	NA	0.00678179	NA	NA	NA	NA	0.000211145	0.00888654	0.0283094	0.0257376	NA	NA	NA	0.000493614
on.gene.LG15.249	NA	NA	0.0490768	NA	NA	NA	0.00542402	0.00923938	0.000801156	0.0228823	NA	NA	0.00201297	NA	NA
on.gene.LG15.449	NA	NA	0.00107745	0.00431141	NA	NA	0.00147842	NA	NA	0.00125143	0.00733132	NA	0.00208228	NA	NA
on.gene.LG15.592	NA	NA	0.0134937	NA	NA	NA	0.0057877	0.0358598	0.0215843	0.0176469	NA	NA	0.00917027	NA	NA
on.gene.LG15.657	NA	NA	0.0176965	0.0410326	0.000242532	NA	0.0180844	NA	NA	NA	0.000878768	NA	0.000123132	NA	NA
on.gene.LG16-21.117	NA	NA	0.00112122	0.0069721	NA	NA	NA	NA	NA	NA	0.00111645	0.0123965	NA	0.00612859	0.0267379
on.gene.LG16-21.230	NA	NA	0.000722387	NA	NA	0.000849129	0.0165828	0.000372962	0.0148869	NA	NA	0.000498091	NA	NA	NA
on.gene.LG16-21.3080001	NA	NA	0.0116142	NA	NA	NA	0.0086089	0.0474994	0.0475868	0.0342696	NA	NA	0.0309252	NA	NA
on.gene.LG16-21.326	NA	NA	0.0144827	NA	0.0144465	NA	NA	NA	0.000104134	0.000703038	NA	0.000936207	NA	NA	0.00936323
on.gene.LG16-21.412	NA	NA	0.0133086	NA	NA	NA	0.00127541	0.0269155	0.00391707	0.0158884	NA	NA	0.00207877	NA	NA
on.gene.LG16-21.542	NA	NA	0.000148725	NA	NA	NA	0.0356214	0.00247401	NA	0.000165458	NA	NA	0.0422664	NA	0.0063432
on.gene.LG16-21.73	NA	NA	0.0384526	0.00392221	NA	NA	NA	0.000107172	NA	NA	NA	0.00146195	NA	0.0450716	0.00551778
on.gene.LG16-21.752	NA	NA	0.013137	0.0479315	NA	NA	0.000151569	0.00019315	0.0365889	NA	NA	NA	0.00867148	NA	NA
on.gene.LG16-21.757	NA	NA	0.000272762	0.000315974	0.00389412	NA	NA	NA	0.00337144	NA	NA	NA	NA	0.000151988	0.000621604
on.gene.LG16-21.772	NA	NA	0.000133345	NA	0.0082821	NA	NA	NA	NA	0.00122959	0.0126314	NA	NA	0.00188672	0.0488333
on.gene.LG17.10	NA	NA	0.00212758	0.00040702	0.00165545	NA	NA	NA	NA	0.00463233	0.0015737	0.00560047	NA	NA	NA
on.gene.LG17.217	NA	NA	0.0125605	0.00685433	NA	NA	NA	NA	NA	0.0271057	0.0228531	NA	NA	0.003182	0.00215219
on.gene.LG17.236	NA	NA	0.00329882	NA	0.0276268	0.000768157	NA	NA	0.00703011	NA	NA	NA	0.0046442	0.0177721	NA
on.gene.LG18.528	NA	NA	0.0346375	NA	NA	0.00116598	NA	0.00431202	NA	NA	0.0143889	NA	0.000446901	0.0165793	NA
on.gene.LG19.302	NA	NA	0.0245388	0.0275552	0.00109415	NA	NA	NA	NA	0.00842144	0.0166565	0.000418393	NA	NA	NA
on.gene.LG2.244	NA	NA	0.0264039	0.00172988	NA	0.0334111	NA	NA	NA	NA	NA	NA	0.036739	0.0288965	0.00238823
on.gene.LG2.314	NA	NA	0.00294275	NA	NA	NA	0.0405893	0.000757483	0.0227323	NA	NA	NA	0.00215988	NA	0.000228826
on.gene.LG2.328	NA	NA	0.0250025	0.0048299	NA	NA	0.045791	0.000150792	NA	0.00469919	0.00117016	NA	NA	NA	NA
on.gene.LG2.333	NA	NA	0.00796006	0.00160388	NA	NA	NA	0.000145347	NA	0.0327328	0.0136524	NA	NA	NA	0.0412366
on.gene.LG2.359	NA	NA	0.0334321	NA	0.00654396	NA	NA	NA	0.00116081	0.00600472	NA	0.00117164	NA	0.00598032	NA
on.gene.LG2.384	NA	NA	0.0107306	NA	0.000144011	NA	NA	NA	0.000474008	0.0071346	0.000604907	0.0261869	NA	NA	NA
on.gene.LG2.530	NA	NA	0.0276305	NA	0.0116649	NA	0.00568065	NA	NA	0.0225651	NA	0.0139324	0.00468623	NA	NA
on.gene.LG20.517	NA	NA	0.00198146	NA	NA	0.00029749	NA	0.00650447	NA	NA	0.0235693	0.00123558	0.0240526	NA	NA
on.gene.LG20.561	NA	NA	0.0492662	0.000524664	0.00148929	NA	0.00174752	NA	NA	0.00714902	NA	0.0322885	NA	NA	NA
on.gene.LG20.65	NA	NA	0.0199305	NA	0.00297864	NA	0.0395455	NA	NA	0.00518493	NA	0.000878082	0.0143257	NA	NA
on.gene.LG20.811	NA	NA	0.00796006	0.00179616	0.00768323	NA	NA	NA	0.0115465	NA	NA	NA	NA	0.00851903	0.00235478
on.gene.LG22.185	NA	NA	0.0202722	0.00311454	NA	NA	NA	0.0183592	0.00227631	0.0405641	0.0113029	NA	NA	NA	NA
on.gene.LG22.321	NA	NA	0.0222681	NA	0.00621846	NA	NA	NA	0.011869	0.000581423	NA	0.000152915	NA	0.0289825	NA
on.gene.LG22.335	NA	NA	0.0234492	0.0260705	0.00925914	NA	NA	NA	NA	0.000413657	0.000787919	0.000118627	NA	NA	NA
on.gene.LG22.494	NA	NA	0.00860554	0.0295672	NA	0.00325945	NA	NA	NA	NA	NA	NA	0.00504779	0.0124875	0.0442332
on.gene.LG23.221	NA	NA	0.000147358	0.000183567	0.0090773	0.00478517	NA	NA	NA	NA	NA	NA	NA	0.00985112	0.0121946
on.gene.LG23.229	NA	NA	0.0238717	0.0104919	NA	NA	NA	NA	NA	NA	NA	0.0291387	0.000439901	0.0325357	0.0229192
on.gene.LG23.396	NA	NA	0.0492359	0.0198141	0.00172726	NA	NA	NA	0.00323532	NA	NA	NA	NA	0.0383331	0.0175026
on.gene.LG3.317	NA	NA	0.0316958	0.0107571	0.00298813	NA	NA	NA	NA	0.0092555	0.00478654	0.000873421	NA	NA	NA
on.gene.LG3.336	NA	NA	0.00100302	0.0429475	0.000123834	NA	0.00362672	NA	NA	0.0430032	NA	0.0177871	NA	NA	NA
on.gene.LG3.3600001	NA	NA	0.00156035	0.0305047	NA	NA	NA	0.0472013	NA	0.00112122	0.0374387	NA	NA	0.0249569	NA
on.gene.LG3.385	NA	NA	0.0159321	NA	NA	NA	NA	0.0017511	0.0302634	0.0065659	0.000319769	NA	0.00114019	NA	NA
on.gene.LG4.291	NA	NA	0.00106572	NA	NA	0.000236269	NA	NA	0.000295607	NA	NA	NA	0.00190214	0.00755264	0.000665554
on.gene.LG4.51	NA	NA	0.0254126	NA	0.0310462	NA	NA	NA	NA	0.00560293	NA	0.0214879	NA	0.00349683	0.0336495
on.gene.LG4.770	NA	NA	0.000523503	NA	NA	NA	NA	0.0230026	0.0256441	NA	0.000391649	0.000185395	NA	NA	0.0221678
on.gene.LG4.824	NA	NA	0.000509478	NA	NA	NA	0.0396838	NA	0.00222296	0.000529411	0.026482	NA	0.0423128	NA	NA
on.gene.LG5.230001	NA	NA	0.0159538	0.000620839	0.00603613	NA	NA	NA	NA	NA	0.0192697	NA	0.015088	0.000139319	NA
on.gene.LG5.936	NA	NA	0.0418987	0.000456849	0.044625	NA	NA	NA	NA	0.00285959	NA	0.00450266	NA	NA	0.0247337
on.gene.LG6.49	NA	NA	0.0268951	0.000172573	NA	NA	0.00853767	0.000731025	0.00724783	NA	0.01384	NA	NA	NA	NA
on.gene.LG6.650	NA	NA	0.0348929	NA	NA	0.0437245	NA	0.000122372	0.000579681	NA	0.0468235	0.000218239	NA	NA	NA
on.gene.LG6.776	NA	NA	0.0016847	0.0100098	NA	NA	NA	NA	0.000928468	NA	NA	0.00625293	NA	0.000127871	0.00124263
on.gene.LG6.937	NA	NA	0.00324001	NA	NA	0.00452596	NA	0.00140042	NA	NA	NA	0.00255156	0.00386112	0.00271661	NA
on.gene.LG6.973	NA	NA	0.000216336	NA	0.000778904	NA	NA	NA	0.00130331	0.00280229	NA	0.0103056	NA	0.000262233	NA
on.gene.LG7.1030	NA	NA	0.0295247	NA	NA	NA	0.000690219	0.000335391	0.0392301	NA	NA	NA	0.0235821	NA	0.00426021
on.gene.LG7.1267	NA	NA	0.0373795	0.0012314	0.000103316	NA	NA	NA	0.0322525	NA	0.00343799	0.000290394	NA	NA	NA
on.gene.LG7.188	NA	NA	0.0498165	NA	0.0162254	NA	NA	NA	0.0176151	0.00388633	NA	0.00117366	NA	NA	0.000234702
on.gene.LG7.955	NA	NA	0.00016574	NA	NA	0.00304714	NA	NA	0.000126141	NA	NA	0.024957	NA	0.0297146	0.000492371
on.gene.LG8-24.558	NA	NA	0.000183134	0.0361897	NA	NA	NA	0.018301	NA	0.0123108	NA	NA	0.000340944	NA	0.016428
on.gene.LG8-24.92	NA	NA	0.0157765	NA	0.0433826	NA	NA	NA	NA	0.00300378	0.0213813	NA	NA	0.00546875	0.0253776
on.gene.LG9.143	NA	NA	0.0254017	0.0337866	0.00900569	NA	NA	NA	0.0474904	NA	NA	NA	NA	0.00559932	0.00992844
on.gene.LG9.2350001	NA	NA	0.00640333	0.000716538	0.0100215	NA	NA	NA	0.000184738	NA	NA	NA	0.0228826	NA	0.0268947
on.gene.LG9.293	NA	NA	0.000458114	0.000904598	NA	NA	0.0268586	NA	0.00241426	0.0275943	NA	0.0488739	NA	NA	NA
on.gene.LG9.428	NA	NA	0.0250404	0.00534819	0.0164778	NA	NA	NA	NA	0.0143164	0.00166414	0.0141151	NA	NA	NA
on.gene.LG9.99	NA	NA	0.0223018	0.00646993	0.000330239	NA	NA	NA	0.00386692	NA	NA	0.0223667	NA	NA	0.0318715
on.gene.UNK11.28	NA	NA	0.00159838	0.00227786	NA	NA	0.000215401	NA	NA	0.00393572	0.00897054	NA	0.000799436	NA	NA
on.gene.UNK119.3	NA	NA	0.0139799	NA	0.0102281	NA	0.00322726	NA	NA	0.000217179	NA	0.000220064	NA	NA	0.0401782
on.gene.UNK12.15	NA	NA	0.0133955	NA	0.0278802	NA	0.00216625	NA	NA	0.0327768	0.00326058	0.00211545	NA	NA	NA
on.gene.UNK133.5	NA	NA	0.00166146	NA	NA	0.000257522	NA	0.00166231	NA	NA	0.0454686	0.000286328	NA	0.000231548	NA
on.gene.UNK146.2	NA	NA	0.0357656	NA	NA	NA	NA	0.0497136	0.0458659	NA	NA	NA	0.000594261	0.000115464	0.00532931
on.gene.UNK201.3	NA	NA	0.021894	NA	NA	0.00366148	NA	0.0123294	NA	NA	NA	0.00211492	0.00149693	0.0101596	NA
on.gene.UNK211.5	NA	NA	0.0252322	NA	0.00550613	0.00779376	NA	NA	0.00478383	NA	NA	NA	0.014636	0.0111861	NA
on.gene.UNK213.7	NA	NA	0.0161675	NA	NA	0.00411995	0.0141671	0.00431226	0.00503487	NA	NA	0.000942653	NA	NA	NA
on.gene.UNK22.22	NA	NA	0.0143254	NA	NA	NA	0.0498731	0.00269521	0.0175102	0.00649924	NA	NA	0.0305396	NA	NA
on.gene.UNK242.6	NA	NA	0.0066986	0.0164389	0.00315276	NA	NA	NA	0.00777664	NA	NA	NA	NA	0.0112336	0.0282885
on.gene.UNK27.9	NA	NA	0.00564062	NA	NA	0.0273462	NA	0.000494487	NA	NA	NA	0.00438769	0.0334474	0.00728466	NA
on.gene.UNK28.13	NA	NA	0.000144722	NA	NA	0.000165979	NA	0.000197367	NA	NA	NA	0.000247273	0.00280617	0.00278892	NA
on.gene.UNK3.102	NA	NA	0.000718506	NA	0.00329015	NA	NA	NA	NA	0.000194735	0.0364491	0.00155724	NA	NA	0.0368799
on.gene.UNK305.1	NA	NA	0.00922178	0.000355285	NA	NA	NA	0.0204924	NA	NA	NA	NA	0.0338231	0.000119882	0.0158876
on.gene.UNK332.3	NA	NA	0.0269718	NA	0.00204605	NA	NA	NA	0.000836337	NA	NA	0.0168852	NA	0.0102148	0.0487624
on.gene.UNK336.1	NA	NA	0.00569954	NA	NA	0.0232253	0.0437895	0.000233783	0.0417876	NA	NA	0.00148566	NA	NA	NA
on.gene.UNK41.9	NA	NA	0.0425053	0.000110028	NA	NA	NA	0.00390044	0.00541148	0.000169266	NA	NA	0.000266517	NA	NA
on.gene.UNK431.1	NA	NA	0.000636832	NA	0.0379566	NA	0.0331782	NA	NA	NA	0.0264949	0.0128504	0.00935483	NA	NA
on.gene.UNK51.31	NA	NA	0.0250384	NA	NA	0.00401767	0.0161954	0.0259448	0.0226992	NA	NA	0.00524753	NA	NA	NA
on.gene.UNK5654.1	NA	NA	0.030192	0.027506	NA	NA	NA	NA	NA	0.000156948	NA	0.00560047	0.04121	NA	0.000897413
on.gene.UNK717.1	NA	NA	0.0129838	NA	NA	NA	NA	0.000154361	0.0343604	NA	0.00890112	0.00762499	NA	NA	0.00466402
on.gene.UNK90.6	NA	NA	0.0493261	0.005155	NA	NA	NA	0.0133183	NA	0.000133459	NA	NA	NA	0.020844	0.0021748
on.gene.UNK99.13	NA	NA	0.0156127	0.019477	NA	NA	NA	NA	NA	0.0103376	0.0230509	NA	NA	0.0111092	0.0164616
on.gene.LG1.170	NA	NA	NA	0.00543206	0.00189745	NA	NA	NA	NA	0.0144829	0.0147083	0.00498772	NA	0.00307975	NA
on.gene.LG1.671	NA	NA	NA	0.00077607	0.0140935	NA	0.0251577	NA	NA	NA	0.000106858	0.002558	0.00465685	NA	NA
on.gene.LG10.184	NA	NA	NA	0.0149432	0.00180975	NA	NA	0.0198663	0.012911	NA	0.00296312	0.000156121	NA	NA	NA
on.gene.LG10.220	NA	NA	NA	0.00203148	0.00311025	NA	NA	NA	0.0164951	NA	0.000129966	0.000129692	NA	NA	0.00848475
on.gene.LG10.70	NA	NA	NA	0.000843023	0.0307069	0.0197529	NA	NA	0.0175701	NA	NA	NA	0.00815828	NA	0.0026056
on.gene.LG11.18	NA	NA	NA	0.00239313	NA	NA	NA	0.00883961	0.0438198	NA	0.0445273	0.0138512	NA	NA	0.0435111
on.gene.LG11.320	NA	NA	NA	0.049788	0.00032628	NA	NA	0.000807201	0.000756331	NA	0.0449041	0.000203709	NA	NA	NA
on.gene.LG11.644	NA	NA	NA	0.0489141	0.000343421	NA	NA	0.000361013	0.000548899	NA	0.04756	0.000285073	NA	NA	NA
on.gene.LG11.951	NA	NA	NA	0.0295495	0.00101937	NA	NA	0.00538612	0.00140188	NA	0.000203504	NA	NA	NA	0.0317713
on.gene.LG12.153	NA	NA	NA	0.00793831	0.0113349	NA	NA	NA	0.0010945	NA	0.000373683	0.000386589	NA	NA	0.000699174
on.gene.LG12.319	NA	NA	NA	0.0132726	0.000912057	NA	NA	0.0142634	NA	NA	NA	0.0052742	0.000129482	0.000647347	NA
on.gene.LG12.355	NA	NA	NA	0.0219254	0.0411396	NA	NA	NA	0.011767	NA	0.00330486	0.00611598	NA	NA	0.00500654
on.gene.LG12.490	NA	NA	NA	0.0228443	NA	NA	0.00013887	NA	0.00158755	0.000797084	NA	0.000149421	NA	0.00667491	NA
on.gene.LG12.672	NA	NA	NA	0.0420505	0.000933733	NA	NA	NA	0.00117003	NA	0.00282659	0.0122049	NA	NA	0.047555
on.gene.LG12.743	NA	NA	NA	0.000798721	0.0478972	NA	0.0263512	NA	NA	NA	0.000665992	0.0162198	0.00648612	NA	NA
on.gene.LG12.793	NA	NA	NA	0.00138041	NA	NA	0.00341433	0.00102887	NA	NA	0.0164294	0.000159158	0.0284757	NA	NA
on.gene.LG12.825	NA	NA	NA	0.0345469	0.000315748	NA	0.0118781	NA	NA	0.0118422	0.000905138	NA	0.000105382	NA	NA
on.gene.LG12.842	NA	NA	NA	0.0152991	0.000897199	NA	0.0357505	NA	NA	0.0135787	0.00224035	NA	0.00449387	NA	NA
on.gene.LG12.85	NA	NA	NA	0.00177346	0.000297543	NA	NA	NA	0.0036676	NA	0.0120427	0.00246336	NA	NA	0.0116698
on.gene.LG12.956	NA	NA	NA	0.0224686	0.000991387	NA	NA	NA	0.00852282	0.0491537	0.0213253	0.000681723	NA	NA	NA
on.gene.LG12.976	NA	NA	NA	0.0174163	0.00548293	NA	NA	0.048103	0.00161514	0.0369679	NA	NA	NA	NA	0.00560845
on.gene.LG13.148	NA	NA	NA	0.00706019	0.000473997	NA	NA	NA	0.000217735	NA	0.0133755	0.000821389	NA	NA	0.0033129
on.gene.LG13.216	NA	NA	NA	0.0141694	NA	NA	0.00151068	NA	0.0290561	0.000144833	NA	0.000192959	NA	0.0237937	NA
on.gene.LG13.3520001	NA	NA	NA	0.047158	0.00595197	0.00129529	NA	0.0120694	NA	0.00036203	NA	NA	NA	NA	0.000548381
on.gene.LG13.4100001	NA	NA	NA	0.00508214	0.036833	NA	0.00438106	NA	NA	NA	0.00470258	0.0330919	0.00303097	NA	NA
on.gene.LG13.46	NA	NA	NA	0.0191972	0.00606017	NA	0.0216792	NA	NA	NA	0.0175403	0.00466596	0.0143451	NA	NA
on.gene.LG13.720	NA	NA	NA	0.0230095	0.0484657	NA	NA	NA	NA	0.0294243	0.000264889	0.000445604	0.0381161	NA	NA
on.gene.LG13.764	NA	NA	NA	0.00728162	0.0214894	0.0138781	NA	NA	0.0398181	NA	NA	NA	0.0195237	NA	0.0121119
on.gene.LG13.82	NA	NA	NA	0.0128473	0.00036071	0.000505115	NA	0.00656828	NA	0.00622814	NA	NA	NA	0.000135266	NA
on.gene.LG14.123	NA	NA	NA	0.0374571	0.000714977	NA	NA	0.00811539	0.00586064	NA	0.0142825	0.000110497	NA	NA	NA
on.gene.LG14.264	NA	NA	NA	0.00013758	0.0215842	NA	NA	NA	0.000122374	NA	0.00428609	0.000319625	NA	NA	0.0221659
on.gene.LG14.45	NA	NA	NA	0.0280074	0.00223848	NA	0.0345155	NA	NA	0.0369219	NA	0.00012331	0.00432003	NA	NA
on.gene.LG14.670	NA	NA	NA	0.000190916	0.0433126	0.003319	NA	NA	0.0481627	NA	NA	NA	0.00289423	NA	0.000193974
on.gene.LG14.737	NA	NA	NA	0.0298331	0.000696558	0.0392741	NA	NA	0.00214868	0.000374728	NA	NA	NA	NA	0.0190959
on.gene.LG14.862	NA	NA	NA	0.000118152	0.000153606	0.0426923	NA	NA	0.00113807	NA	NA	NA	0.0142446	NA	0.000665518
on.gene.LG15.106	NA	NA	NA	0.00979084	0.0480758	0.00326584	NA	NA	0.00825299	NA	NA	NA	0.000239509	NA	0.00114161
on.gene.LG15.702	NA	NA	NA	0.0120572	0.0012716	NA	0.000724563	0.00995427	NA	0.000803155	NA	NA	NA	0.00610048	NA
on.gene.LG16-21.394	NA	NA	NA	0.000815111	0.00132145	NA	NA	NA	0.0267368	NA	0.0053635	0.00835092	NA	NA	0.0134281
on.gene.LG16-21.539	NA	NA	NA	0.0023588	0.00337927	NA	NA	NA	0.00337179	NA	0.00245607	0.00306766	NA	NA	0.00201074
on.gene.LG17.172	NA	NA	NA	0.000439676	NA	NA	0.0329551	0.00115541	0.0336493	0.00982611	NA	NA	0.000578222	NA	NA
on.gene.LG17.387	NA	NA	NA	0.0185064	NA	NA	0.00494962	0.0173331	NA	0.0120689	0.00311682	NA	0.000404344	NA	NA
on.gene.LG17.662	NA	NA	NA	0.00494114	0.00409473	NA	0.00478392	NA	NA	NA	0.00264183	0.00171796	0.0017556	NA	NA
on.gene.LG17.672	NA	NA	NA	0.00077414	0.00124365	0.0217574	NA	NA	0.0214204	NA	NA	NA	0.00181843	NA	0.0101883
on.gene.LG18.154	NA	NA	NA	0.0120572	0.00421222	0.00767768	NA	NA	0.0225619	NA	NA	NA	0.0267368	NA	0.0414996
on.gene.LG18.83	NA	NA	NA	0.00147148	NA	0.00918604	0.0143874	0.000810526	0.0461459	NA	NA	0.0349889	NA	NA	NA
on.gene.LG19.191	NA	NA	NA	0.0389337	NA	0.0443735	NA	0.0173449	0.0242248	0.000202237	NA	NA	0.000280199	NA	NA
on.gene.LG19.2190001	NA	NA	NA	0.0294861	0.0022824	NA	0.0299273	NA	NA	NA	0.0296753	0.00141957	0.0211148	NA	NA
on.gene.LG19.230	NA	NA	NA	0.0184599	0.00114745	0.0182845	0.00747954	0.0086185	NA	NA	NA	NA	NA	0.0371376	NA
on.gene.LG19.393	NA	NA	NA	0.0269647	NA	NA	0.0437134	0.0229322	NA	0.00567907	0.000242463	NA	NA	0.000116099	NA
on.gene.LG19.495	NA	NA	NA	0.00986606	NA	NA	NA	0.027128	0.0423637	0.0155333	0.000415932	NA	0.0124101	NA	NA
on.gene.LG19.523	NA	NA	NA	0.0273551	0.0171592	NA	NA	0.00124704	0.0186878	NA	NA	0.00371388	NA	NA	0.0334068
on.gene.LG19.608	NA	NA	NA	0.00198666	0.0102254	0.00108379	0.000284886	NA	NA	0.0319566	NA	NA	NA	0.0140148	NA
on.gene.LG19.662	NA	NA	NA	0.000152672	0.000201067	NA	0.0193444	NA	NA	NA	0.0120429	0.0161838	NA	0.00685624	NA
on.gene.LG19.723	NA	NA	NA	0.000908752	0.00137155	0.000997339	NA	NA	0.00823527	NA	NA	NA	0.00426831	NA	0.00419375
on.gene.LG2.100	NA	NA	NA	0.00310311	NA	NA	NA	0.00266287	0.000586207	NA	0.0409327	0.00050738	NA	NA	0.0288964
on.gene.LG2.261	NA	NA	NA	0.00284012	0.0397594	NA	NA	NA	NA	0.0333016	0.000820251	NA	NA	0.0186633	0.000251541
on.gene.LG2.418	NA	NA	NA	0.0317015	0.000385961	NA	NA	0.0315996	0.0375404	NA	0.0363496	0.000248272	NA	NA	NA
on.gene.LG2.469	NA	NA	NA	0.00187867	0.0480926	0.0205808	NA	0.000105144	0.00678068	NA	NA	NA	NA	NA	0.0210735
on.gene.LG2.495	NA	NA	NA	0.0208357	0.00363706	NA	NA	NA	0.00368366	0.000644154	0.000339971	NA	NA	NA	0.0274441
on.gene.LG20.173	NA	NA	NA	0.0112678	0.00343407	NA	NA	0.0320933	0.0460757	NA	0.00109191	0.000145241	NA	NA	NA
on.gene.LG20.379	NA	NA	NA	0.00229106	NA	NA	NA	0.00565544	0.0318981	0.0168274	0.000279408	NA	0.0079199	NA	NA
on.gene.LG20.543	NA	NA	NA	0.00741671	0.00730212	NA	NA	NA	0.0143677	NA	0.0106438	0.00988975	NA	NA	0.0118246
on.gene.LG20.739	NA	NA	NA	0.0415506	0.000280808	NA	NA	0.00622233	0.0185362	0.00307887	NA	NA	0.00309419	NA	NA
on.gene.LG20.782	NA	NA	NA	0.0137406	0.0172479	NA	0.035062	NA	NA	NA	0.00401948	0.00430274	0.00903832	NA	NA
on.gene.LG20.803	NA	NA	NA	0.0043032	NA	0.0324217	0.023925	0.00380238	0.000116117	NA	NA	0.000165202	NA	NA	NA
on.gene.LG20.826	NA	NA	NA	0.00131142	0.00994622	NA	NA	NA	0.0201041	NA	0.000853206	0.00725023	NA	NA	0.000892726
on.gene.LG20.85	NA	NA	NA	0.019176	0.0466006	NA	NA	0.000418802	0.0284232	0.00253067	NA	NA	NA	NA	0.0400943
on.gene.LG22.11	NA	NA	NA	0.00540842	NA	NA	NA	0.000381108	NA	0.00540822	0.0479879	NA	NA	0.0195348	0.0435189
on.gene.LG22.393	NA	NA	NA	0.000764876	0.00024272	NA	0.0160413	NA	NA	NA	0.000788613	0.000199583	0.0122729	NA	NA
on.gene.LG23.259	NA	NA	NA	0.0193834	0.000124895	NA	NA	NA	0.0408589	NA	0.00244854	0.000321873	NA	NA	0.000101276
on.gene.LG23.346	NA	NA	NA	0.00584965	0.0144918	NA	0.0198874	NA	NA	NA	0.00147425	0.00355164	0.00448751	NA	NA
on.gene.LG23.481	NA	NA	NA	0.0258402	NA	NA	NA	0.000824095	NA	NA	NA	0.000385745	0.00742158	0.0144837	0.000313445
on.gene.LG23.517	NA	NA	NA	0.00624235	0.000230097	NA	NA	NA	0.012746	NA	0.0244538	NA	NA	0.00367867	0.000188196
on.gene.LG3.125	NA	NA	NA	0.00243411	0.000834523	NA	NA	NA	0.00864309	NA	0.000109732	NA	NA	0.0385581	0.015847
on.gene.LG3.154	NA	NA	NA	0.0033243	NA	NA	0.000380273	0.000531475	0.0201222	NA	0.0354256	NA	0.00459294	NA	NA
on.gene.LG3.156	NA	NA	NA	0.0329372	NA	0.000702968	NA	NA	0.00386692	0.00508113	NA	0.0157931	NA	NA	0.000134605
on.gene.LG3.20	NA	NA	NA	0.0194975	NA	NA	NA	0.012114	NA	NA	0.000187926	0.0264847	0.00191555	0.00698699	NA
on.gene.LG4.531	NA	NA	NA	0.0318322	0.00445455	NA	NA	NA	NA	NA	0.0225839	0.00215227	NA	0.042464	0.00348743
on.gene.LG4.87	NA	NA	NA	0.00134465	NA	NA	0.0171899	0.00376492	0.000110192	NA	0.0496148	0.01893	NA	NA	NA
on.gene.LG5.557	NA	NA	NA	0.00237285	0.0043857	NA	NA	NA	0.0339506	NA	0.00336085	0.00557078	NA	NA	0.016069
on.gene.LG5.623	NA	NA	NA	0.0014468	0.0245932	NA	0.00439927	NA	NA	0.0035694	NA	0.0010746	0.000111514	NA	NA
on.gene.LG5.969	NA	NA	NA	0.014707	0.00854727	NA	NA	NA	0.0336935	NA	0.0367589	0.0211312	NA	NA	0.0431088
on.gene.LG6.372	NA	NA	NA	0.0155973	NA	NA	NA	0.000132932	0.00227636	0.00240943	NA	NA	0.017373	NA	0.000312247
on.gene.LG6.748	NA	NA	NA	0.0398289	0.0312078	NA	NA	0.00235336	0.0445197	NA	NA	0.000177999	NA	NA	0.0375915
on.gene.LG7.1009	NA	NA	NA	0.0281868	0.0248925	NA	NA	0.000870386	0.00891708	NA	0.0419301	0.00906547	NA	NA	NA
on.gene.LG7.11120001	NA	NA	NA	0.0331506	0.000319329	NA	NA	0.0166256	0.000304703	NA	0.0119145	NA	NA	NA	0.0276855
on.gene.LG7.2	NA	NA	NA	0.000186195	NA	NA	0.0229371	0.00873103	0.00335048	NA	0.0340783	0.0375811	NA	NA	NA
on.gene.LG7.421	NA	NA	NA	0.016672	0.000945567	NA	NA	NA	0.0185532	NA	0.00149783	0.00310909	NA	NA	0.00166584
on.gene.LG7.437	NA	NA	NA	0.0368055	0.000331143	NA	0.0217315	0.00718818	NA	0.0477767	0.00030137	NA	NA	NA	NA
on.gene.LG7.52	NA	NA	NA	0.00112042	NA	0.0454192	NA	NA	NA	0.0197934	NA	0.0225982	0.0243603	NA	0.000603524
on.gene.LG7.760	NA	NA	NA	0.0215241	0.0170656	NA	NA	NA	0.0181796	0.0110629	0.000263825	NA	NA	NA	0.0278422
on.gene.LG7.849	NA	NA	NA	0.00258326	0.0140588	NA	NA	NA	0.0432955	NA	0.00675518	0.0332182	NA	NA	0.00776857
on.gene.LG8-24.814	NA	NA	NA	0.0412355	0.000238218	NA	NA	0.0403672	0.000267777	NA	NA	0.0077257	NA	NA	0.0379952
on.gene.LG9.439	NA	NA	NA	0.000389578	NA	0.0178287	0.0225282	0.000839257	0.0329286	NA	NA	0.0187271	NA	NA	NA
on.gene.UNK104.3	NA	NA	NA	0.0300529	NA	NA	NA	0.00023436	0.00455213	0.00522598	0.000977629	NA	0.040217	NA	NA
on.gene.UNK113.11	NA	NA	NA	0.000107217	0.000155496	NA	NA	NA	NA	NA	0.00667629	0.0120798	0.000609713	0.0189307	NA
on.gene.UNK113.15	NA	NA	NA	0.0483872	0.000138444	NA	NA	NA	NA	0.0115385	0.00047951	0.00581099	0.04686	NA	NA
on.gene.UNK120.4	NA	NA	NA	0.0108513	0.015076	0.0446422	NA	0.00220211	NA	0.00708421	NA	NA	NA	NA	0.00181087
on.gene.UNK13.32	NA	NA	NA	0.0129522	0.000414994	NA	0.000176609	NA	NA	0.00099558	NA	0.0142873	0.00589184	NA	NA
on.gene.UNK182.10001	NA	NA	NA	0.0195944	0.00374755	NA	0.000275743	NA	NA	NA	0.0237445	0.00400718	0.000259354	NA	NA
on.gene.UNK194.5	NA	NA	NA	0.0191665	0.000168907	NA	0.0457163	NA	NA	0.0224224	0.00160179	NA	0.00339463	NA	NA
on.gene.UNK26.9	NA	NA	NA	0.0357984	0.0010553	NA	NA	0.00249225	0.000152338	NA	0.0102455	NA	NA	NA	0.00833475
on.gene.UNK29.24	NA	NA	NA	0.000587127	NA	NA	NA	0.00628648	NA	NA	0.00600695	0.0240615	0.00993281	0.00357719	NA
on.gene.UNK452.1	NA	NA	NA	0.035561	0.0168881	NA	NA	NA	0.00723241	NA	0.00606999	0.00159115	NA	NA	0.0150161
on.gene.UNK48.7	NA	NA	NA	0.0212149	NA	0.0164075	NA	NA	0.000143378	NA	NA	NA	0.0416421	0.000606228	0.0489286
on.gene.UNK501.1	NA	NA	NA	0.00288883	0.0451847	NA	NA	NA	0.0436736	NA	0.00108684	0.0208902	NA	NA	0.00239174
on.gene.UNK54.14	NA	NA	NA	0.0353369	0.000705855	NA	NA	0.0225306	0.00473956	NA	0.0128773	0.000105846	NA	NA	NA
on.gene.UNK6.18	NA	NA	NA	0.017454	0.00326905	0.0164899	NA	0.015061	NA	0.00228934	NA	NA	NA	NA	0.000556372
on.gene.UNK6.50	NA	NA	NA	0.0138503	0.013414	NA	0.0183486	NA	NA	NA	0.015874	0.0141965	0.0152944	NA	NA
on.gene.UNK67.24	NA	NA	NA	0.027919	0.000469548	NA	NA	NA	NA	0.00681443	0.000169571	0.0282059	0.0206147	NA	NA
on.gene.UNK79.2	NA	NA	NA	0.0218961	NA	NA	NA	0.00941291	NA	0.0111407	0.000903957	NA	NA	0.00686926	0.000403104
on.gene.UNK86.2	NA	NA	NA	0.000433154	0.00505391	NA	NA	0.000859016	NA	NA	0.000885039	0.0087037	NA	0.0479955	NA
on.gene.UNK92.24	NA	NA	NA	0.0471018	0.000943464	NA	NA	NA	0.00893981	0.000153485	0.000117775	NA	0.0455015	NA	NA
on.gene.UNK93.3	NA	NA	NA	0.0412355	0.0161243	NA	NA	0.00295496	0.0157568	NA	0.00574591	0.0463012	NA	NA	NA
on.gene.LG1.435	NA	NA	NA	NA	0.0260242	NA	NA	NA	0.000495918	0.0144829	NA	0.00726966	NA	0.00132247	0.0192809
on.gene.LG1.541	NA	NA	NA	NA	0.000985337	0.000135813	NA	0.00206491	0.000699234	NA	0.0304688	NA	0.000285061	NA	NA
on.gene.LG1.572	NA	NA	NA	NA	0.0156294	0.00525542	NA	0.0332153	0.0314531	0.00938303	NA	NA	0.00827398	NA	NA
on.gene.LG1.600	NA	NA	NA	NA	0.0172817	0.0249857	NA	0.0104433	NA	0.0343825	0.00142682	NA	0.00126842	NA	NA
on.gene.LG1.613	NA	NA	NA	NA	0.0311039	NA	NA	0.0192902	0.00091535	NA	0.0291242	0.00422173	NA	NA	0.0067782
on.gene.LG1.626	NA	NA	NA	NA	0.0119442	NA	0.00693334	0.000602161	NA	NA	NA	0.00124249	0.000559221	0.000267236	NA
on.gene.LG10.15	NA	NA	NA	NA	0.0173319	NA	NA	NA	0.00516821	0.00335462	0.0270722	0.000445847	NA	0.0234535	NA
on.gene.LG11.6650001	NA	NA	NA	NA	0.003817	0.00561907	NA	0.00204819	0.0043798	0.00254575	NA	NA	0.0046442	NA	NA
on.gene.LG11.708	NA	NA	NA	NA	0.00227868	NA	0.0473166	0.000269082	NA	NA	NA	0.000793506	0.0206147	0.0115087	NA
on.gene.LG12.652	NA	NA	NA	NA	0.0158823	0.00303555	NA	0.0376767	0.0254454	0.00048467	NA	NA	0.00232709	NA	NA
on.gene.LG13.5880001	NA	NA	NA	NA	0.0324099	NA	0.000741952	NA	NA	NA	NA	0.0149023	0.000155117	0.0423016	0.00396232
on.gene.LG14.22	NA	NA	NA	NA	0.000119092	0.0497044	NA	0.000339706	0.00661477	0.0131514	NA	NA	0.00315466	NA	NA
on.gene.LG14.315	NA	NA	NA	NA	0.0108141	NA	0.000211529	NA	NA	NA	NA	0.0150378	0.000268082	0.00303295	0.00586262
on.gene.LG14.332	NA	NA	NA	NA	0.00945086	0.00586846	0.00139864	0.0233382	NA	0.0126498	NA	NA	NA	0.00398279	NA
on.gene.LG14.691	NA	NA	NA	NA	0.0141811	NA	0.00827534	NA	NA	NA	NA	0.0250418	0.0115219	0.0399835	0.0267937
on.gene.LG14.785	NA	NA	NA	NA	0.00303295	0.0156057	NA	0.00285992	0.0451296	0.0100219	NA	NA	0.00114332	NA	NA
on.gene.LG15.235	NA	NA	NA	NA	0.0069105	NA	0.00108687	NA	NA	NA	NA	0.0253519	0.00408456	0.0252983	0.0427007
on.gene.LG15.480	NA	NA	NA	NA	0.000968925	NA	NA	NA	NA	0.026914	0.0331401	0.000125259	NA	0.00655985	0.00653682
on.gene.LG15.674	NA	NA	NA	NA	0.00639157	0.000107569	NA	0.0098024	NA	0.000138892	0.00411384	NA	0.0288621	NA	NA
on.gene.LG16-21.541	NA	NA	NA	NA	0.0354114	NA	NA	0.0211464	0.000900937	NA	0.0134611	0.00190224	NA	NA	0.00501848
on.gene.LG18.312	NA	NA	NA	NA	0.0139723	0.0455702	NA	0.0166921	0.000545623	0.0342291	0.00046718	NA	NA	NA	NA
on.gene.LG18.647	NA	NA	NA	NA	0.00196607	0.0028326	0.0368131	0.000174857	NA	0.000187818	NA	NA	NA	0.00686365	NA
on.gene.LG19.102	NA	NA	NA	NA	0.00826818	NA	0.0176862	0.00915895	NA	NA	NA	0.000360888	0.00103991	0.0193273	NA
on.gene.LG19.264	NA	NA	NA	NA	0.00166203	NA	0.00852419	0.0109931	NA	NA	NA	0.011079	0.0319078	0.0396822	NA
on.gene.LG19.745	NA	NA	NA	NA	0.0190035	0.0436861	NA	0.00298919	0.0161991	0.00775278	NA	NA	0.0285804	NA	NA
on.gene.LG2.190	NA	NA	NA	NA	0.000127779	0.00126118	NA	NA	0.000145379	0.0476969	0.00520426	NA	0.00155639	NA	NA
on.gene.LG2.324	NA	NA	NA	NA	0.0033952	NA	0.00934019	0.00687556	NA	NA	NA	0.007626	0.0152437	0.0173334	NA
on.gene.LG2.583	NA	NA	NA	NA	0.000672133	NA	0.0308204	0.00047844	NA	NA	NA	0.00112917	0.0394544	0.0243682	NA
on.gene.LG20.180	NA	NA	NA	NA	0.000176238	NA	0.0233029	0.0249372	NA	0.0201618	NA	NA	0.000202269	NA	0.00328431
on.gene.LG20.2100001	NA	NA	NA	NA	0.000220881	NA	0.0231535	0.0015266	NA	NA	NA	0.000322186	0.0248487	NA	0.00364094
on.gene.LG20.33	NA	NA	NA	NA	0.00578138	0.00838161	NA	0.0389291	0.000382111	0.000658511	NA	NA	NA	NA	0.0147754
on.gene.LG20.884	NA	NA	NA	NA	0.0486509	0.0340005	0.00179349	NA	NA	0.00320344	0.000105359	NA	NA	0.0114918	NA
on.gene.LG22.485	NA	NA	NA	NA	0.000219518	0.00224191	0.039249	0.0299632	NA	0.0196908	NA	NA	NA	0.0049972	NA
on.gene.LG22.513	NA	NA	NA	NA	0.00758513	NA	0.0336104	0.00860751	NA	NA	NA	0.00137612	0.00680649	0.0371655	NA
on.gene.LG22.553	NA	NA	NA	NA	0.0252255	NA	0.0235522	0.0130852	NA	NA	NA	0.0101263	0.00788304	0.0118859	NA
on.gene.LG23.416	NA	NA	NA	NA	0.0455183	0.0132701	NA	NA	0.00716113	0.0321724	0.0289923	NA	0.0457398	NA	NA
on.gene.LG23.84	NA	NA	NA	NA	0.0111558	NA	0.0254976	0.00357424	NA	NA	NA	0.00498919	0.0106142	0.00969731	NA
on.gene.LG3.241	NA	NA	NA	NA	0.01511	NA	0.00365442	NA	NA	NA	NA	0.0144401	0.00276978	0.0200271	0.0162057
on.gene.LG3.370	NA	NA	NA	NA	0.0310923	0.00292563	NA	0.00239092	0.000404762	0.0158884	0.000290423	NA	NA	NA	NA
on.gene.LG4.110	NA	NA	NA	NA	0.0180538	NA	0.00134255	NA	NA	0.0414757	0.0322686	NA	NA	0.0187109	0.0125158
on.gene.LG4.1750001	NA	NA	NA	NA	0.000692727	NA	0.000886672	0.0282031	NA	NA	NA	0.00627326	0.00574059	0.0285134	NA
on.gene.LG4.343	NA	NA	NA	NA	0.0122777	0.00207205	NA	NA	0.0243948	0.00280006	0.00935421	NA	0.00344993	NA	NA
on.gene.LG4.42	NA	NA	NA	NA	0.0111659	NA	NA	0.000207658	0.0165419	NA	0.0172946	0.0206575	NA	NA	0.0480005
on.gene.LG4.558	NA	NA	NA	NA	0.0231212	0.0195531	NA	0.00671663	0.00703277	0.026914	0.000525334	NA	NA	NA	NA
on.gene.LG5.1031	NA	NA	NA	NA	0.000463976	0.0244874	NA	0.000734393	NA	0.029338	0.0145768	NA	0.000535621	NA	NA
on.gene.LG5.441	NA	NA	NA	NA	0.00187589	0.00932015	NA	0.000116682	0.000275356	0.0336137	NA	NA	0.0413872	NA	NA
on.gene.LG5.537	NA	NA	NA	NA	0.0305757	NA	NA	NA	0.0226605	0.00431009	NA	0.00070914	NA	0.0408733	0.000899158
on.gene.LG5.774	NA	NA	NA	NA	0.003903	0.00276824	NA	0.0118984	0.00217269	0.000618765	NA	NA	0.00628057	NA	NA
on.gene.LG6.471	NA	NA	NA	NA	0.000983285	0.00556174	0.0141671	0.0015883	NA	0.00699106	NA	NA	NA	0.0204205	NA
on.gene.LG6.564	NA	NA	NA	NA	0.000113784	NA	0.000312154	0.000188054	NA	NA	NA	NA	0.00015764	0.000495668	0.000101374
on.gene.LG6.683	NA	NA	NA	NA	0.0064977	0.00107897	0.0234131	0.0141932	NA	0.00191213	NA	NA	NA	0.0453767	NA
on.gene.LG6.91	NA	NA	NA	NA	0.00789228	NA	0.0361014	0.00264529	NA	NA	NA	0.00056662	0.00283704	0.0155522	NA
on.gene.LG7.1321	NA	NA	NA	NA	0.00290798	0.000633214	NA	0.0451183	0.00752007	0.0109512	NA	NA	0.00132162	NA	NA
on.gene.LG7.194	NA	NA	NA	NA	0.00573354	0.0351842	NA	0.0154659	NA	0.00963941	0.0046115	NA	0.00163359	NA	NA
on.gene.LG7.26	NA	NA	NA	NA	0.000570753	0.000827434	0.0299273	0.000162326	NA	0.000170076	NA	NA	NA	0.0134043	NA
on.gene.LG7.96	NA	NA	NA	NA	0.0052447	NA	0.038983	0.00785627	NA	NA	0.00564982	0.00629856	0.0102839	NA	NA
on.gene.LG8-24.25	NA	NA	NA	NA	0.0148317	NA	0.000162088	0.0223179	NA	NA	0.01919	0.00254434	NA	0.00026575	NA
on.gene.LG8-24.371	NA	NA	NA	NA	0.00016612	0.000928015	0.0263294	NA	NA	NA	0.000188949	NA	NA	0.000106951	0.00715463
on.gene.LG8-24.96	NA	NA	NA	NA	0.0269526	NA	NA	0.0301071	0.000223451	NA	0.0468029	0.00021189	NA	NA	0.0233759
on.gene.LG9.199	NA	NA	NA	NA	0.0238229	0.0126531	NA	0.000173123	0.0340046	NA	0.00301032	NA	0.010528	NA	NA
on.gene.LG9.347	NA	NA	NA	NA	0.0181354	0.011964	NA	0.0196166	NA	0.00673112	0.00137744	NA	0.000960716	NA	NA
on.gene.LG9.89	NA	NA	NA	NA	0.0212094	NA	NA	0.0113308	NA	NA	0.0487515	0.000620433	0.00298772	0.0356322	NA
on.gene.UNK181.5	NA	NA	NA	NA	0.0250446	0.000380579	NA	0.0223121	0.0164073	0.000235496	NA	NA	0.000132957	NA	NA
on.gene.UNK28.6	NA	NA	NA	NA	0.00628648	0.00966451	NA	0.0114363	0.0412064	0.0142277	NA	NA	0.042088	NA	NA
on.gene.UNK316.5	NA	NA	NA	NA	0.00910904	0.00103137	NA	0.0103331	0.000617109	0.000339052	NA	NA	0.01473	NA	NA
on.gene.UNK318.5	NA	NA	NA	NA	0.00408438	NA	0.00386366	0.0241143	NA	NA	NA	0.00031808	0.00964932	0.000251197	NA
on.gene.UNK32.100001	NA	NA	NA	NA	0.00272515	NA	0.00484071	0.00678089	NA	NA	NA	0.000170086	0.000371412	0.010935	NA
on.gene.UNK3449.9999	NA	NA	NA	NA	0.00230925	NA	0.0207774	0.00307839	NA	NA	NA	0.00621403	0.0368288	0.0255152	NA
on.gene.UNK4.750001	NA	NA	NA	NA	0.00505391	0.0327457	NA	NA	0.0277626	0.000534134	0.00170387	NA	0.00766905	NA	NA
on.gene.UNK43.21	NA	NA	NA	NA	0.042806	0.00991391	NA	0.0350047	0.0472358	0.0067007	NA	NA	0.00853235	NA	NA
on.gene.UNK506.3	NA	NA	NA	NA	0.000539778	NA	NA	0.00228789	0.010614	0.0497806	NA	NA	0.0190801	NA	0.0165073
on.gene.UNK613.1	NA	NA	NA	NA	0.0260326	NA	NA	0.00970384	0.00069771	0.0295994	0.000179493	NA	0.00289159	NA	NA
on.gene.UNK66.18	NA	NA	NA	NA	0.00165756	0.00590588	NA	0.00589283	0.00126183	0.000934996	NA	NA	0.00952499	NA	NA
on.gene.UNK88.16	NA	NA	NA	NA	0.0429181	0.0413726	NA	NA	0.0120191	0.0461788	0.0353945	NA	0.00897001	NA	NA
on.gene.UNK88.7	NA	NA	NA	NA	0.00346625	NA	NA	0.00117771	0.00202758	0.0201618	0.0256196	NA	0.0265473	NA	NA
on.gene.UNK90.17	NA	NA	NA	NA	0.0152609	NA	0.000546864	NA	NA	0.0410146	0.0040212	NA	NA	0.00735896	0.0320876
on.gene.LG1.139	NA	NA	NA	NA	NA	0.00903661	NA	0.00727488	NA	NA	0.00543965	0.0257374	0.044567	0.0475321	NA
on.gene.LG1.142	NA	NA	NA	NA	NA	0.000990956	0.0013281	NA	0.0273457	NA	0.0023031	0.0199612	NA	NA	0.00263546
on.gene.LG13.860	NA	NA	NA	NA	NA	0.0336691	NA	NA	0.0363427	0.00487877	0.0167134	0.00739737	NA	NA	0.047555
on.gene.LG16-21.286	NA	NA	NA	NA	NA	0.0376706	0.0130579	NA	0.000979201	0.0215789	NA	0.0342254	NA	0.0179646	NA
on.gene.LG16-21.590	NA	NA	NA	NA	NA	0.00787552	NA	0.0221161	0.0354408	0.038028	0.0116912	NA	0.0317007	NA	NA
on.gene.LG16-21.594	NA	NA	NA	NA	NA	0.00187571	0.0330701	NA	NA	0.016216	0.000302875	0.00269209	NA	NA	0.00771371
on.gene.LG18.755	NA	NA	NA	NA	NA	0.000326904	NA	NA	NA	0.033486	0.0355807	0.000157261	NA	0.0180638	0.0202429
on.gene.LG2.241	NA	NA	NA	NA	NA	0.000527241	0.0166981	NA	0.0308552	NA	NA	0.000878019	NA	0.000109807	0.000683014
on.gene.LG2.366	NA	NA	NA	NA	NA	0.00987846	0.0146462	0.0337352	0.0420499	NA	0.00169605	NA	NA	NA	0.0426407
on.gene.LG20.231	NA	NA	NA	NA	NA	0.026362	0.00243217	NA	NA	0.0204446	0.00333764	0.00448451	NA	NA	0.0461151
on.gene.LG23.505	NA	NA	NA	NA	NA	0.0450457	NA	0.0205384	0.00082796	NA	0.0226663	0.000236152	NA	NA	0.0331761
on.gene.LG3.165	NA	NA	NA	NA	NA	0.0162042	NA	0.0181376	0.0439455	0.0369684	0.00228022	NA	0.0283107	NA	NA
on.gene.LG4.434	NA	NA	NA	NA	NA	0.00806209	0.000269778	NA	0.000644276	0.0265247	NA	0.0159634	NA	0.00160266	NA
on.gene.LG5.540001	NA	NA	NA	NA	NA	0.000980918	0.0130077	NA	0.0494441	0.027726	0.049884	0.00446893	NA	NA	NA
on.gene.LG5.900	NA	NA	NA	NA	NA	0.0182468	0.00830921	0.0227849	NA	0.00404809	NA	NA	NA	0.00207934	0.02108
on.gene.LG6.209	NA	NA	NA	NA	NA	0.00959595	0.00387939	NA	NA	0.0066713	0.00100114	NA	NA	0.00306975	0.00030088
on.gene.LG6.67	NA	NA	NA	NA	NA	0.00673677	0.0366631	NA	NA	0.000153456	0.0190061	0.0159821	NA	0.0023503	NA
on.gene.LG6.900	NA	NA	NA	NA	NA	0.039238	NA	NA	0.0397451	0.00307962	NA	0.00404748	NA	0.0329415	0.018965
on.gene.LG7.1080	NA	NA	NA	NA	NA	0.00196768	0.043527	NA	NA	0.0324781	0.00417436	NA	NA	0.00572091	0.000383972
on.gene.LG7.349	NA	NA	NA	NA	NA	0.0445022	NA	NA	0.0433594	0.00260542	0.00130783	NA	NA	0.046575	0.000227629
on.gene.LG7.48	NA	NA	NA	NA	NA	0.0227961	0.0116044	NA	NA	0.024211	0.00215384	NA	NA	0.00799871	0.0457504
on.gene.LG8-24.131	NA	NA	NA	NA	NA	0.0175849	0.015365	NA	NA	0.00889094	0.00674336	NA	NA	0.00931707	0.0310376
on.gene.LG8-24.229	NA	NA	NA	NA	NA	0.00427345	0.0444342	NA	NA	0.00024424	0.0136524	NA	NA	0.00675916	0.00309213
on.gene.LG9.408	NA	NA	NA	NA	NA	0.000763109	0.00467895	NA	0.00865276	0.000160661	NA	0.00118607	NA	0.00165655	NA
on.gene.UNK1.39	NA	NA	NA	NA	NA	0.00661581	0.00190581	NA	0.00375977	NA	NA	0.0122217	NA	0.046353	0.0260583
on.gene.UNK1923.1	NA	NA	NA	NA	NA	0.000695423	0.0149676	0.0264204	0.00197778	NA	0.000465967	NA	NA	NA	0.00961627
on.gene.UNK3.64	NA	NA	NA	NA	NA	0.00725011	NA	NA	0.00373436	0.00800422	0.00963018	0.00019095	NA	NA	0.0496023
on.gene.UNK39.29	NA	NA	NA	NA	NA	0.00262237	NA	NA	NA	0.00124059	0.00180202	0.0147923	NA	0.0361139	0.0354473
on.gene.UNK43.27	NA	NA	NA	NA	NA	0.00126287	0.000411787	NA	NA	0.00592138	NA	0.000136421	NA	0.00281769	0.0276946
on.gene.UNK50.16	NA	NA	NA	NA	NA	0.00129511	NA	NA	NA	0.000556136	0.000441517	0.00920658	NA	0.0453767	0.0274942
on.gene.UNK5100.1	NA	NA	NA	NA	NA	0.0272919	NA	0.039998	NA	NA	0.0227328	0.00188375	0.000172985	0.00793815	NA
on.gene.UNK5118.1	NA	NA	NA	NA	NA	0.0189277	NA	NA	0.00030603	0.00319428	0.013168	0.00970188	NA	NA	0.00051983
on.gene.UNK5268.1	NA	NA	NA	NA	NA	0.0238461	NA	NA	0.000645876	0.0119041	0.00758041	0.00480174	NA	NA	0.00104002
on.gene.UNK8.31	NA	NA	NA	NA	NA	0.0025311	0.00803013	0.00305717	NA	NA	0.012469	0.0289558	NA	NA	0.0264668
on.gene.UNK81.5	NA	NA	NA	NA	NA	0.037625	NA	NA	NA	0.00276505	0.000536699	0.0409729	NA	0.00995773	0.0015516
on.gene.LG17.741	NA	NA	NA	NA	NA	NA	0.0193173	NA	0.0441457	0.0205615	0.0317565	NA	NA	0.000374524	0.000666353
on.gene.LG20.248	NA	NA	NA	NA	NA	NA	0.0387083	NA	0.000265993	NA	0.0238386	0.00898308	NA	0.0293305	0.000748161
on.gene.LG4.960	NA	NA	NA	NA	NA	NA	0.0174074	NA	NA	0.0159895	0.0158463	0.00261327	NA	0.000625675	0.00064672
on.gene.LG8-24.259	NA	NA	NA	NA	NA	NA	0.0196376	0.0142572	NA	NA	NA	0.00124405	0.00019849	0.00337483	0.0316789
on.gene.UNK210.2	NA	NA	NA	NA	NA	NA	0.00595084	0.000166251	NA	NA	NA	0.00019273	0.0214451	0.0203319	0.000143305
on.gene.UNK472.4	NA	NA	NA	NA	NA	NA	0.0427918	NA	0.00240359	NA	0.0013553	0.0124829	NA	0.0208903	0.0001537
on.gene.LG14.154	NA	NA	NA	NA	NA	NA	NA	NA	0.000941312	0.00744441	0.000541343	0.00200401	NA	0.00412822	0.000179682
on.gene.LG16-21.643	NA	NA	NA	NA	NA	NA	NA	NA	0.00211991	0.0189853	0.00305344	0.00220926	NA	0.0195745	0.00224549
on.gene.LG17.247	NA	NA	NA	NA	NA	NA	NA	NA	0.00112063	0.0240357	0.0190794	0.0176711	NA	0.00743992	0.00970657
on.gene.LG17.624	NA	NA	NA	NA	NA	NA	NA	NA	0.0087133	0.00209871	0.00106106	0.0128962	NA	0.00170405	0.000588915
on.gene.LG22.529	NA	NA	NA	NA	NA	NA	NA	NA	0.000596269	0.00750658	0.0462398	0.0165515	NA	0.000247781	0.00188916
on.gene.LG7.974	NA	NA	NA	NA	NA	NA	NA	NA	0.0207359	0.00177138	0.00140414	0.00155441	NA	0.0228098	0.0134436
on.gene.UNK1548.1	NA	NA	NA	NA	NA	NA	NA	NA	0.00535826	0.015444	0.0110085	0.00411924	NA	0.0205601	0.0106228
on.gene.LG1.1	0.0207182	NA	NA	0.00876007	0.0327498	NA	NA	NA	0.0234461	NA	NA	NA	NA	NA	0.0053446
on.gene.LG1.104	0.0125249	0.0397364	NA	0.00251056	NA	0.00702449	NA	NA	NA	0.0236712	NA	NA	NA	NA	NA
on.gene.LG1.126	0.029438	0.0021463	0.033373	NA	0.00118834	NA	NA	NA	NA	NA	NA	NA	0.00551694	NA	NA
on.gene.LG1.138	0.043687	0.0111205	NA	0.0162928	NA	NA	NA	NA	NA	NA	0.031492	NA	NA	NA	0.000473815
on.gene.LG1.234	0.00926439	NA	NA	NA	NA	0.0312755	NA	NA	NA	NA	0.000876552	0.00697456	0.0154058	NA	NA
on.gene.LG1.275	0.000167898	0.011169	0.027345	NA	NA	NA	NA	NA	NA	0.0187749	NA	NA	NA	NA	0.0308478
on.gene.LG1.293	0.00486846	0.00679853	NA	0.00207373	NA	NA	NA	NA	NA	NA	0.0159282	NA	NA	NA	0.000929137
on.gene.LG1.315	0.0352705	0.00501764	NA	NA	0.0161687	NA	NA	NA	NA	0.00143653	NA	NA	0.0065037	NA	NA
on.gene.LG1.335	0.0052686	NA	NA	NA	0.0122585	NA	NA	NA	0.0362099	NA	0.0438331	0.000339477	NA	NA	NA
on.gene.LG1.353	0.0306317	0.000281631	NA	0.00228274	NA	NA	NA	NA	NA	NA	0.00197934	NA	NA	NA	0.000631815
on.gene.LG1.359	0.0223348	0.0347019	NA	0.00545836	NA	NA	NA	NA	NA	NA	0.000634276	NA	NA	NA	0.00554894
on.gene.LG1.360	0.0177036	0.0214761	NA	NA	NA	0.00246358	NA	NA	NA	NA	NA	0.0143626	NA	NA	0.00505484
on.gene.LG1.395	0.00429431	NA	NA	0.00269351	0.045783	NA	NA	NA	NA	NA	NA	0.000302001	0.027753	NA	NA
on.gene.LG1.404	0.000231388	NA	NA	NA	0.00524893	NA	NA	NA	NA	NA	0.0305414	0.000173662	NA	NA	0.00126781
on.gene.LG1.4080001	0.00134972	NA	NA	0.0349765	NA	0.0185058	0.00674533	NA	NA	0.000211372	NA	NA	NA	NA	NA
on.gene.LG1.433	0.0208847	0.00890659	NA	0.000319435	NA	NA	NA	NA	NA	NA	0.00206933	NA	NA	NA	0.00480478
on.gene.LG1.440	0.00577117	NA	NA	0.00012773	NA	NA	NA	0.00148258	NA	NA	0.0193552	0.00588793	NA	NA	NA
on.gene.LG1.4820001	0.000243459	NA	NA	0.0445344	NA	NA	NA	NA	NA	0.000207713	NA	NA	0.0219935	NA	0.0144029
on.gene.LG1.504	0.0116358	NA	NA	0.000122915	NA	NA	NA	0.00786897	NA	NA	0.00113806	0.011639	NA	NA	NA
on.gene.LG1.505	0.0170264	NA	NA	0.04763	0.00345803	NA	NA	0.000495772	NA	NA	NA	0.0104596	NA	NA	NA
on.gene.LG1.516	0.0237344	0.0130733	NA	NA	NA	NA	NA	NA	NA	0.0254573	NA	0.0123982	NA	NA	0.000843622
on.gene.LG1.549	0.000161596	NA	0.0159321	NA	NA	NA	NA	0.00691211	NA	NA	0.0303448	NA	NA	0.0406816	NA
on.gene.LG1.587	0.00022186	NA	NA	NA	0.00036258	NA	0.00890942	0.0139034	NA	NA	NA	NA	0.00304022	NA	NA
on.gene.LG1.589	0.0179962	NA	NA	0.000397631	NA	NA	NA	0.00464314	0.000169471	0.00499707	NA	NA	NA	NA	NA
on.gene.LG1.590	0.000174315	0.000104299	NA	0.000397136	NA	NA	NA	NA	NA	NA	0.00439811	NA	NA	NA	0.00384563
on.gene.LG1.638	0.0473683	0.0112413	NA	0.018853	NA	NA	NA	NA	NA	NA	0.00781328	NA	NA	NA	0.00735864
on.gene.LG1.700	0.00298387	0.0433381	NA	0.000627291	NA	NA	NA	NA	NA	NA	NA	0.019331	NA	NA	0.00959133
on.gene.LG1.84	0.00803583	NA	NA	NA	NA	0.00277115	NA	0.000450862	0.0418832	NA	0.0001423	NA	NA	NA	NA
on.gene.LG1.9	0.00138187	NA	NA	NA	0.00233499	NA	0.0378635	NA	NA	NA	NA	0.0181746	NA	NA	0.0432292
on.gene.LG1.96	0.0230212	0.000549317	NA	0.000761017	NA	NA	NA	NA	NA	NA	0.00366159	NA	NA	NA	0.0021845
on.gene.LG10.122	0.0477868	NA	NA	NA	NA	0.0450258	NA	0.0151937	NA	NA	0.0221075	0.00644701	NA	NA	NA
on.gene.LG10.137	0.00335216	NA	NA	NA	NA	0.00088975	NA	NA	0.000587842	NA	NA	0.0261137	NA	NA	0.0155368
on.gene.LG10.226	0.000503725	0.000556062	NA	0.000593169	NA	NA	NA	NA	NA	NA	0.0287634	NA	NA	NA	0.00175027
on.gene.LG10.227	0.0022838	NA	NA	0.0484349	0.00389378	0.0013687	NA	NA	NA	NA	NA	NA	NA	0.034889	NA
on.gene.LG10.230	0.00107371	0.000949911	NA	0.000646993	NA	NA	NA	NA	NA	NA	0.000426425	NA	NA	NA	0.00021456
on.gene.LG10.282	0.00687951	0.0452298	NA	0.000128948	NA	NA	NA	NA	NA	NA	0.000316162	NA	NA	NA	0.00095667
on.gene.LG10.290	0.0158436	0.000119663	NA	0.000817141	NA	NA	NA	NA	0.0366107	NA	NA	NA	0.00066954	NA	NA
on.gene.LG10.330	0.0219799	0.00121898	NA	0.0142775	NA	NA	NA	NA	NA	NA	0.000252845	NA	NA	NA	0.0011525
on.gene.LG10.337	0.000301186	0.0119361	NA	0.000149517	NA	NA	NA	NA	NA	NA	0.00964226	NA	NA	NA	0.00165401
on.gene.LG10.348	0.0247352	0.0161587	NA	NA	NA	NA	0.04288	NA	NA	0.0327424	NA	0.0192306	NA	NA	NA
on.gene.LG10.37	0.00241374	NA	NA	NA	NA	NA	0.000119656	0.00604518	NA	0.00286991	NA	NA	NA	0.00994907	NA
on.gene.LG10.372	0.000140895	NA	0.0114173	NA	NA	NA	NA	NA	0.0207978	NA	NA	0.0409937	NA	NA	0.0288797
on.gene.LG10.390	0.000434224	0.016647	NA	0.00661336	NA	NA	NA	NA	NA	NA	0.000749979	NA	NA	NA	0.00244505
on.gene.LG10.413	0.00968969	0.00195163	NA	0.0184003	NA	NA	NA	NA	NA	NA	0.0213954	NA	NA	NA	0.012554
on.gene.LG10.432	0.00552567	0.000393074	NA	0.00132384	NA	NA	NA	NA	NA	NA	NA	0.0373168	NA	NA	0.0175343
on.gene.LG10.433	0.0060801	NA	NA	0.000114584	0.0427689	0.0216001	NA	NA	NA	NA	NA	NA	NA	NA	0.0279502
on.gene.LG10.83	0.00460065	NA	NA	NA	NA	0.0203112	NA	0.000377249	NA	NA	0.0291732	NA	NA	0.0495449	NA
on.gene.LG11.11	0.0172656	0.015247	NA	0.0145192	NA	NA	NA	NA	NA	NA	0.00649612	NA	NA	NA	0.000436336
on.gene.LG11.130	0.00328151	0.000133542	NA	0.0231443	NA	NA	NA	NA	NA	NA	0.0391505	NA	NA	NA	0.029699
on.gene.LG11.185	0.0224265	NA	NA	NA	NA	0.0272919	NA	0.0106213	NA	NA	0.00235417	0.000727012	NA	NA	NA
on.gene.LG11.267	0.0104455	0.000196591	NA	0.000222408	NA	NA	NA	NA	NA	NA	0.00933309	NA	NA	NA	0.00985037
on.gene.LG11.269	0.00151448	NA	NA	0.000342575	NA	0.00861251	NA	NA	0.00730794	0.0197978	NA	NA	NA	NA	NA
on.gene.LG11.271	0.0160398	0.00226272	NA	0.000280282	NA	NA	NA	NA	NA	NA	0.00179529	NA	NA	NA	0.000687271
on.gene.LG11.296	0.0494829	NA	0.000772203	NA	0.007977	NA	NA	NA	NA	NA	0.0315704	0.000201874	NA	NA	NA
on.gene.LG11.328	0.0146227	NA	NA	0.0137478	0.00645734	NA	NA	0.00523523	0.0410951	NA	NA	NA	NA	NA	NA
on.gene.LG11.358	0.0398497	NA	NA	NA	NA	0.00117025	NA	0.013652	0.0116896	NA	NA	NA	NA	NA	0.0265227
on.gene.LG11.425	0.0228235	0.00419067	NA	0.000924607	NA	NA	NA	NA	NA	NA	0.00164097	NA	NA	NA	0.0357165
on.gene.LG11.433	0.034558	0.00323928	NA	0.000611465	NA	NA	NA	NA	NA	NA	0.00184236	NA	NA	NA	0.000704869
on.gene.LG11.468	0.0326362	NA	NA	0.0190603	NA	NA	NA	NA	0.0182667	NA	0.0282054	0.0454666	NA	NA	NA
on.gene.LG11.518	0.0135362	0.0200301	NA	0.000487018	NA	NA	NA	NA	NA	NA	0.0024251	NA	NA	NA	0.0130824
on.gene.LG11.5560001	0.0354958	0.00552306	NA	NA	NA	NA	0.0085765	NA	NA	0.00392744	NA	0.000218116	NA	NA	NA
on.gene.LG11.569	0.000163009	0.000407466	NA	0.00768471	NA	NA	NA	NA	NA	NA	0.000555543	NA	NA	NA	0.0488614
on.gene.LG11.581	0.0248082	0.0200499	NA	NA	0.000257665	NA	NA	NA	0.0138866	NA	NA	NA	NA	0.0386725	NA
on.gene.LG11.582	0.00422736	0.000315058	NA	0.00345578	NA	NA	NA	NA	NA	NA	0.000377526	NA	NA	NA	0.000786058
on.gene.LG11.592	0.021078	0.0131989	NA	0.0219887	NA	NA	NA	NA	NA	NA	0.00102552	NA	NA	NA	0.00114652
on.gene.LG11.612	0.0178104	0.00670184	NA	NA	0.000183212	0.0247797	NA	NA	NA	NA	NA	NA	NA	0.000716401	NA
on.gene.LG11.614	0.000481122	0.00709297	NA	0.0146266	NA	NA	NA	NA	NA	NA	NA	0.0271497	NA	NA	0.00120599
on.gene.LG11.616	0.00849593	0.0314087	0.00255726	NA	0.00683303	NA	NA	NA	NA	NA	NA	NA	0.0328989	NA	NA
on.gene.LG11.6160001	0.0440909	NA	NA	NA	0.0102204	NA	NA	NA	NA	0.0498629	NA	NA	0.0308325	NA	0.0235238
on.gene.LG11.625	0.0141396	NA	NA	0.00186209	NA	0.00214374	NA	0.0410332	NA	0.0121784	NA	NA	NA	NA	NA
on.gene.LG11.646	0.00163717	NA	NA	0.0014212	NA	NA	NA	NA	0.000143724	NA	0.0031934	NA	NA	NA	0.0205487
on.gene.LG11.718	0.0130898	0.00145447	NA	0.0149432	NA	NA	NA	NA	0.00555461	NA	NA	NA	NA	0.0495449	NA
on.gene.LG11.721	0.00295225	NA	NA	NA	NA	NA	NA	0.000374085	NA	NA	0.0294855	0.0103368	NA	0.0125751	NA
on.gene.LG11.726	0.00036252	0.00221696	NA	0.000195448	NA	NA	NA	NA	NA	NA	0.0001588	NA	NA	NA	0.00536325
on.gene.LG11.733	0.0334346	NA	NA	NA	0.0321325	NA	NA	0.000103952	NA	NA	NA	0.018652	NA	0.0453767	NA
on.gene.LG11.825	0.0212828	NA	NA	NA	0.00319688	NA	NA	0.0262753	NA	NA	NA	NA	0.000559221	NA	0.000136888
on.gene.LG11.864	0.00270057	NA	NA	NA	NA	NA	NA	NA	NA	NA	0.01367	0.000265516	0.0326443	0.00799895	NA
on.gene.LG11.875	0.000365845	0.000335677	NA	NA	NA	0.00481033	0.035062	NA	0.0492483	NA	NA	NA	NA	NA	NA
on.gene.LG11.884	0.00619479	NA	NA	0.0076599	NA	NA	0.00404529	NA	NA	NA	NA	0.00284812	NA	0.00260448	NA
on.gene.LG11.912	0.00141277	0.0163758	NA	NA	0.00727755	NA	NA	NA	NA	NA	NA	NA	0.031249	0.0188834	NA
on.gene.LG11.914	0.00427756	0.0443474	NA	0.000252509	NA	NA	NA	NA	NA	NA	NA	0.00826467	NA	NA	0.0332758
on.gene.LG11.9730002	0.00263117	NA	NA	0.000196435	NA	NA	NA	0.012503	0.00156654	NA	NA	NA	NA	NA	0.0224482
on.gene.LG12.112	0.00154535	NA	NA	0.000285652	0.0156294	NA	NA	0.0453282	NA	NA	0.00653086	NA	NA	NA	NA
on.gene.LG12.128	0.0107557	0.00171895	NA	NA	NA	NA	NA	NA	NA	0.0377106	NA	0.00662311	NA	NA	0.0204111
on.gene.LG12.163	0.000180779	NA	NA	0.00340255	NA	NA	NA	0.04331	NA	NA	0.000322667	NA	NA	NA	0.000483603
on.gene.LG12.176	0.0112678	0.00776433	NA	0.00704375	NA	NA	NA	NA	NA	NA	NA	0.0328965	0.016412	NA	NA
on.gene.LG12.196	0.00109439	NA	NA	NA	NA	NA	NA	NA	0.000101775	NA	0.0093318	0.00023848	NA	NA	0.00389234
on.gene.LG12.212	0.0331644	NA	0.0106005	NA	0.000208728	0.00256349	0.00142024	NA	NA	NA	NA	NA	NA	NA	NA
on.gene.LG12.221	0.0054756	0.00260922	NA	0.018661	NA	NA	NA	NA	NA	NA	0.00330083	NA	NA	NA	0.0101249
on.gene.LG12.2210001	0.00123924	0.000911287	NA	0.000508562	NA	NA	NA	NA	NA	NA	0.00137877	NA	NA	NA	0.000282391
on.gene.LG12.248	0.0239093	NA	0.0064718	NA	NA	NA	NA	NA	0.00010101	0.0474753	NA	NA	NA	0.00350671	NA
on.gene.LG12.305	0.00332622	0.00644932	NA	0.0358025	NA	NA	NA	NA	NA	NA	0.0159672	NA	NA	NA	0.0029405
on.gene.LG12.345	0.00520014	0.00807411	NA	0.00394092	NA	NA	NA	NA	NA	NA	0.00277517	NA	NA	NA	0.0325811
on.gene.LG12.372	0.0361371	NA	NA	0.000250357	NA	NA	NA	0.00220698	NA	NA	0.000443429	0.0304599	NA	NA	NA
on.gene.LG12.3940001	0.0103423	0.000393916	NA	0.00862345	NA	NA	NA	NA	NA	NA	NA	0.0125327	NA	NA	0.0493223
on.gene.LG12.46	0.0133883	NA	NA	0.0224585	NA	NA	NA	NA	NA	0.0453751	NA	NA	0.0150351	NA	0.0032261
on.gene.LG12.461	0.0376548	NA	NA	0.00054974	0.032638	NA	0.0362113	NA	NA	NA	0.00220867	NA	NA	NA	NA
on.gene.LG12.473	0.00941376	NA	NA	0.000267438	0.00898176	NA	NA	NA	NA	NA	0.00732973	NA	NA	NA	0.00314533
on.gene.LG12.482	0.0332848	0.0072141	NA	0.0131176	NA	NA	NA	NA	NA	NA	0.00506626	NA	NA	NA	0.0225258
on.gene.LG12.498	0.0412254	0.000216043	NA	NA	0.0141934	NA	NA	NA	0.000475297	NA	0.0400741	NA	NA	NA	NA
on.gene.LG12.507	0.0216594	0.00522121	NA	NA	NA	0.0138345	NA	NA	0.0202717	0.00020093	NA	NA	NA	NA	NA
on.gene.LG12.596	0.00701031	NA	NA	0.00122488	0.0044497	NA	NA	0.0197868	NA	NA	NA	NA	NA	NA	0.029752
on.gene.LG12.612	0.0073317	NA	NA	NA	NA	0.0301366	NA	0.000108458	0.0391618	NA	0.00300968	NA	NA	NA	NA
on.gene.LG12.669	0.000523795	NA	NA	NA	NA	NA	0.0282597	NA	0.0401228	NA	0.000689321	NA	NA	NA	0.0391353
on.gene.LG12.701	0.0298414	0.0121839	NA	NA	0.000424009	NA	NA	NA	0.00848369	NA	NA	NA	NA	0.0466193	NA
on.gene.LG12.727	0.00996116	NA	NA	0.00124888	0.000539691	0.000518474	NA	NA	NA	0.00380044	NA	NA	NA	NA	NA
on.gene.LG12.75	0.0079348	NA	NA	NA	NA	NA	NA	0.0250668	0.0346163	NA	0.0304665	NA	NA	NA	0.00814784
on.gene.LG12.823	0.0479775	0.0108906	NA	NA	NA	0.000713111	NA	NA	NA	0.00031085	NA	NA	0.0314042	NA	NA
on.gene.LG12.902	0.000952596	NA	0.00175936	NA	0.00402767	NA	0.0041502	NA	NA	NA	NA	NA	NA	NA	0.000318218
on.gene.LG12.926	0.00752522	NA	NA	NA	0.0240745	0.00185443	NA	NA	0.0359364	NA	NA	NA	NA	0.00447861	NA
on.gene.LG12.9310001	0.00273895	NA	NA	0.0360665	0.0262561	0.00685382	NA	NA	NA	0.000125755	NA	NA	NA	NA	NA
on.gene.LG13.100	0.014002	NA	NA	0.00206183	0.0147012	NA	0.0338443	NA	NA	NA	0.0110498	NA	NA	NA	NA
on.gene.LG13.119	0.00285387	0.00261117	NA	NA	0.0427284	NA	NA	NA	NA	0.00191815	NA	0.00133044	NA	NA	NA
on.gene.LG13.132	0.0111292	NA	NA	0.0224052	NA	0.0491743	NA	NA	NA	0.00138815	NA	NA	NA	0.000152578	NA
on.gene.LG13.186	0.00832728	0.00509299	NA	0.000757534	NA	NA	NA	NA	NA	NA	0.000299763	NA	NA	NA	0.0104094
on.gene.LG13.206	0.0439745	0.00350009	NA	0.00425035	NA	NA	NA	NA	NA	NA	0.00125526	NA	NA	NA	0.00197459
on.gene.LG13.231	0.000404913	0.00101218	NA	NA	NA	0.00923153	0.0375698	NA	NA	0.0301906	NA	NA	NA	NA	NA
on.gene.LG13.24	0.000141926	NA	0.0150246	NA	NA	NA	NA	NA	NA	0.0305633	NA	0.0175268	NA	0.0112551	NA
on.gene.LG13.27	0.0335406	NA	NA	0.0243405	NA	0.00109913	NA	NA	NA	0.000950231	NA	NA	0.00860015	NA	NA
on.gene.LG13.323	0.026382	0.00587887	NA	0.00591233	NA	NA	NA	NA	NA	NA	0.0404842	NA	NA	NA	0.00502994
on.gene.LG13.331	0.00666298	0.000975968	NA	0.00496635	NA	NA	NA	NA	NA	NA	0.000118995	NA	NA	NA	0.000115862
on.gene.LG13.372	0.000222111	0.00781332	NA	NA	NA	0.00749506	NA	NA	NA	NA	NA	0.0319166	NA	NA	0.000698691
on.gene.LG13.4070001	0.00471526	0.00222061	NA	0.000560279	NA	NA	NA	NA	NA	NA	0.025749	NA	NA	NA	0.00259206
on.gene.LG13.411	0.00391937	0.043013	NA	0.000211264	NA	NA	NA	NA	NA	NA	0.000749979	NA	NA	NA	0.0233348
on.gene.LG13.456	0.0097156	NA	NA	0.00188286	NA	0.0409802	NA	NA	0.000537016	0.00598816	NA	NA	NA	NA	NA
on.gene.LG13.500	0.00242927	NA	NA	0.00219791	NA	NA	NA	NA	NA	NA	0.000292205	0.0136228	NA	NA	0.00698167
on.gene.LG13.503	0.00976737	0.00230609	NA	0.0374491	NA	NA	NA	NA	NA	0.0163271	NA	0.00310974	NA	NA	NA
on.gene.LG13.517	0.00219513	0.0400429	NA	0.000129598	NA	NA	NA	NA	NA	NA	0.00430607	NA	NA	NA	0.00259224
on.gene.LG13.534	0.00651224	0.00270973	NA	0.0140445	NA	NA	NA	NA	NA	NA	0.020174	NA	NA	NA	0.0149497
on.gene.LG13.5530001	0.00131788	NA	NA	NA	0.00153324	0.0338172	NA	NA	0.0053053	NA	NA	NA	0.0153098	NA	NA
on.gene.LG13.561	0.000805056	NA	NA	0.000194224	NA	NA	NA	NA	0.0219583	NA	0.0439683	0.00832671	NA	NA	NA
on.gene.LG13.593	0.0466251	NA	NA	0.000174935	NA	NA	NA	NA	0.000548899	0.0125061	NA	NA	0.00353852	NA	NA
on.gene.LG13.633	0.0047147	NA	0.00338296	NA	NA	0.0218555	NA	0.0118512	NA	NA	0.0271736	NA	NA	NA	NA
on.gene.LG13.637	0.00238142	0.0221552	NA	0.0105077	NA	NA	NA	NA	NA	NA	0.00400036	NA	NA	NA	0.000661385
on.gene.LG13.644	0.000847075	0.00237751	NA	0.000433154	NA	NA	NA	NA	NA	NA	0.000939027	NA	NA	NA	0.0231186
on.gene.LG13.664	0.0078026	0.00901403	NA	0.0305773	NA	NA	NA	NA	NA	NA	0.0223998	NA	NA	NA	0.0191627
on.gene.LG13.667	0.00938282	0.00152285	NA	NA	NA	NA	0.00565502	NA	NA	0.00136137	NA	0.000763343	NA	NA	NA
on.gene.LG13.672	0.0024023	NA	NA	NA	0.00264443	NA	NA	NA	NA	0.0479161	NA	0.041528	NA	0.0349521	NA
on.gene.LG13.675	0.0430416	0.00085719	NA	0.0079344	NA	NA	NA	NA	NA	NA	NA	0.0254148	NA	NA	0.00373853
on.gene.LG13.716	0.00209675	0.000534902	NA	0.00748443	NA	NA	NA	NA	NA	NA	0.000623363	NA	NA	NA	0.0187739
on.gene.LG13.729	0.00545832	0.00272528	NA	0.000373462	NA	NA	NA	NA	NA	NA	0.000263948	NA	NA	NA	0.0167805
on.gene.LG13.777	0.0292126	0.0453179	NA	0.0356511	NA	NA	NA	NA	0.0064159	NA	NA	0.000179926	NA	NA	NA
on.gene.LG13.797	0.00334098	0.0025633	NA	0.00380972	NA	NA	NA	NA	NA	NA	0.00512153	NA	NA	NA	0.00199351
on.gene.LG13.805	0.00136048	0.0144436	NA	NA	0.0190421	NA	NA	NA	0.0359575	0.00269254	NA	NA	NA	NA	NA
on.gene.LG13.822	0.0358685	NA	NA	0.000280282	0.044092	NA	NA	NA	NA	NA	0.00714422	NA	NA	NA	0.0141092
on.gene.LG13.832	0.0266624	NA	NA	0.00332889	0.0475302	NA	NA	0.00553624	NA	NA	NA	NA	NA	0.0105823	NA
on.gene.LG13.839	0.0479601	NA	NA	0.014341	NA	NA	NA	0.000288343	0.0171169	NA	0.0130429	NA	NA	NA	NA
on.gene.LG13.842	0.0286511	NA	NA	0.0149753	NA	0.0331734	NA	NA	NA	0.0447939	NA	NA	NA	NA	0.030019
on.gene.LG13.847	0.0463416	NA	NA	NA	0.000394856	NA	NA	0.000207997	0.0386469	NA	NA	0.000766823	NA	NA	NA
on.gene.LG13.872	0.016669	0.000981776	NA	NA	NA	0.000859868	NA	NA	NA	NA	NA	0.00409899	NA	NA	0.0314268
on.gene.LG13.881	0.015614	0.00946221	0.0207261	NA	0.00698707	NA	NA	NA	NA	NA	NA	NA	NA	NA	0.041233
on.gene.LG13.940001	0.0288827	0.00287035	NA	0.0217164	NA	NA	NA	NA	NA	NA	NA	0.0302936	NA	NA	0.0168828
on.gene.LG13.960001	0.000618747	0.00073343	NA	0.00602429	NA	NA	NA	NA	NA	NA	0.035548	NA	NA	NA	0.00112061
on.gene.LG14.114	0.019842	0.00352057	NA	0.00267314	NA	NA	NA	NA	NA	NA	0.00183507	NA	NA	NA	0.00869271
on.gene.LG14.185	0.00324585	0.000120344	NA	0.000231352	NA	NA	NA	NA	NA	NA	0.000720626	NA	NA	NA	0.000267569
on.gene.LG14.196	0.000773922	NA	NA	NA	0.000122517	NA	NA	NA	0.0304453	NA	0.0372496	NA	NA	0.0116335	NA
on.gene.LG14.199	0.0148169	NA	NA	0.00024631	NA	0.00133769	NA	NA	0.0208067	0.0417012	NA	NA	NA	NA	NA
on.gene.LG14.202	0.0440909	NA	NA	NA	NA	NA	NA	0.000295793	0.000248769	NA	NA	0.00549328	NA	NA	0.0257541
on.gene.LG14.21	0.0084485	NA	NA	NA	0.00542668	NA	NA	NA	0.000215977	NA	NA	0.00241958	NA	NA	0.0320501
on.gene.LG14.211	0.025975	NA	NA	NA	0.00171981	NA	NA	NA	0.048302	NA	NA	0.00263809	NA	NA	0.000344256
on.gene.LG14.250	0.00145937	NA	0.0273485	NA	NA	NA	NA	0.00702217	NA	NA	0.019729	NA	NA	0.0111861	NA
on.gene.LG14.268	0.00970159	0.00589308	NA	0.0119587	NA	NA	NA	NA	NA	NA	0.0192697	NA	0.00010405	NA	NA
on.gene.LG14.27	0.00995394	NA	NA	0.00647255	NA	NA	NA	NA	NA	NA	0.0399075	0.0482649	NA	NA	0.0007187
on.gene.LG14.2860001	0.00238144	0.000259081	NA	0.00123522	NA	NA	NA	NA	NA	NA	0.0115355	NA	NA	NA	0.00614561
on.gene.LG14.30	0.00275507	NA	NA	0.0184588	NA	NA	NA	NA	0.000810544	NA	0.0103671	0.0423079	NA	NA	NA
on.gene.LG14.322	0.0125146	NA	NA	NA	0.0166328	NA	NA	0.000239775	NA	NA	0.00234159	NA	NA	NA	0.000405834
on.gene.LG14.328	0.00211124	NA	NA	NA	NA	0.00695307	0.0211518	NA	NA	NA	0.0151799	NA	NA	NA	0.0173088
on.gene.LG14.334	0.0118683	0.000362038	0.0326497	NA	NA	NA	0.0244999	NA	NA	NA	NA	NA	NA	NA	0.0142611
on.gene.LG14.335	0.0270609	NA	NA	0.0333999	NA	NA	NA	0.0486769	NA	NA	0.0210492	0.0437541	NA	NA	NA
on.gene.LG14.3560001	0.00212977	NA	0.00924549	NA	NA	NA	NA	NA	0.0236242	NA	0.0275627	0.0252558	NA	NA	NA
on.gene.LG14.369	0.0245799	0.00247346	NA	NA	NA	0.000261673	NA	NA	NA	NA	0.0249884	NA	NA	NA	0.00276465
on.gene.LG14.412	0.000207921	0.0374455	NA	0.0158359	NA	NA	NA	NA	NA	NA	0.000898631	NA	NA	NA	0.00117753
on.gene.LG14.421	0.00349606	0.000720119	NA	0.00313135	NA	NA	NA	NA	NA	NA	0.011317	NA	NA	NA	0.00217029
on.gene.LG14.435	0.0306586	0.000134951	NA	NA	0.00215222	NA	NA	NA	NA	NA	NA	0.000332169	NA	0.0359887	NA
on.gene.LG14.451	0.00438599	0.0115826	NA	0.0291032	NA	NA	NA	NA	NA	NA	0.00396519	NA	NA	NA	0.0072249
on.gene.LG14.457	0.00315225	0.000271891	NA	0.0199856	NA	NA	NA	NA	NA	NA	0.000302218	NA	NA	NA	0.000634514
on.gene.LG14.480	0.00126594	0.00150849	NA	0.000190916	NA	NA	NA	NA	NA	NA	0.0276421	NA	NA	NA	0.000213458
on.gene.LG14.490	0.0128297	0.00724336	NA	0.00604537	NA	NA	NA	NA	NA	NA	0.002619	NA	NA	NA	0.00389201
on.gene.LG14.494	0.002852	0.000437411	NA	NA	0.0198986	NA	NA	NA	NA	0.0175464	NA	0.00287488	NA	NA	NA
on.gene.LG14.555	0.0305638	0.0428738	NA	NA	NA	0.0241441	NA	NA	NA	NA	0.034401	NA	0.00152901	NA	NA
on.gene.LG14.598	0.00125096	NA	NA	NA	NA	NA	0.001703	0.0059246	NA	NA	0.000982479	0.00559256	NA	NA	NA
on.gene.LG14.603	0.0136511	NA	NA	NA	0.00585607	NA	NA	0.000680445	NA	NA	0.034223	0.00250482	NA	NA	NA
on.gene.LG14.61	0.000573781	NA	NA	0.00269507	NA	NA	NA	NA	NA	NA	0.0109027	0.0172019	NA	NA	0.000308976
on.gene.LG14.612	0.000459277	NA	NA	NA	0.00953137	NA	NA	NA	NA	0.000690956	NA	NA	0.0104938	NA	0.00521872
on.gene.LG14.643	0.00160848	NA	NA	0.00335295	0.000186273	NA	NA	0.00236996	NA	NA	NA	NA	0.00281781	NA	NA
on.gene.LG14.646	0.0284631	NA	NA	0.0291286	NA	NA	NA	NA	0.0421248	NA	NA	0.00167672	NA	NA	0.000981709
on.gene.LG14.661	0.0406284	NA	NA	NA	NA	NA	NA	0.00826819	0.0232069	NA	0.0236908	0.00376161	NA	NA	NA
on.gene.LG14.672	0.0162719	NA	0.013137	NA	NA	NA	0.00127541	NA	0.00266992	0.000417182	NA	NA	NA	NA	NA
on.gene.LG14.75	0.00878143	0.00524898	NA	0.0133544	NA	NA	NA	NA	NA	NA	0.00551547	NA	NA	NA	0.00397018
on.gene.LG14.797	0.0273156	NA	0.0304861	NA	NA	NA	NA	0.00016207	NA	0.00745515	NA	NA	NA	0.0478367	NA
on.gene.LG15.132	0.00134273	NA	NA	0.0205949	NA	NA	NA	NA	0.0220797	0.0308154	NA	0.00103143	NA	NA	NA
on.gene.LG15.213	0.000245596	NA	NA	NA	0.00138888	NA	NA	0.000491264	0.00558597	NA	0.000300191	NA	NA	NA	NA
on.gene.LG15.219	0.0297227	NA	0.0198525	NA	NA	NA	NA	0.000460359	NA	0.00185556	NA	NA	NA	0.0475215	NA
on.gene.LG15.234	0.0297384	NA	NA	0.00051856	0.00684553	NA	NA	NA	NA	NA	NA	0.000260426	NA	NA	0.0206535
on.gene.LG15.26	0.0375889	NA	NA	NA	NA	NA	NA	NA	0.0437062	0.0393817	NA	NA	0.00718389	NA	0.00597398
on.gene.LG15.303	0.00386902	NA	NA	0.0351324	NA	0.0293155	NA	NA	NA	NA	NA	0.00094267	0.0103631	NA	NA
on.gene.LG15.304	0.00230331	0.000212214	NA	0.0032706	NA	NA	NA	NA	0.029033	NA	0.00197519	NA	NA	NA	NA
on.gene.LG15.331	0.0125146	0.000225609	NA	NA	0.00096991	NA	NA	NA	NA	0.000744482	NA	NA	0.0118678	NA	NA
on.gene.LG15.372	0.000184654	NA	NA	NA	NA	NA	0.00493359	NA	0.0267509	NA	0.00761855	0.000386334	NA	NA	NA
on.gene.LG15.401	0.0463808	NA	NA	NA	NA	NA	0.000784928	NA	0.00272352	NA	NA	NA	0.00161362	0.0272051	NA
on.gene.LG15.410	0.0405945	0.000434742	NA	0.00182518	NA	NA	NA	NA	NA	NA	0.000195496	NA	NA	NA	0.000291661
on.gene.LG15.436	0.0479775	NA	NA	0.0013904	NA	NA	NA	0.00428286	0.00184432	NA	0.000113642	NA	NA	NA	NA
[truncated: 14,395 more rows]

## Sheet: DE_exons_in_all_comparisons
gene	exon	GpCh	GpSd	LdCh	LdGp	LdSd	LdTd	LdTm	SdCh	SdTm	TdCh	TdGp	TdSd	TdTm	TmCh	TmGp
on.gene.LG1.1	E001	NA	NA	NA	0.000303279	0.0391387	NA	NA	NA	NA	NA	0.001299	NA	NA	NA	NA
on.gene.LG1.1	E003	NA	NA	NA	NA	NA	NA	NA	NA	NA	NA	NA	0.000265401	0.00185884	NA	NA
on.gene.LG1.1	E005	NA	NA	0.0433508	0.00419102	NA	NA	NA	NA	NA	NA	0.00689339	NA	NA	NA	NA
on.gene.LG1.1	E007	NA	NA	NA	NA	NA	NA	NA	NA	NA	NA	0.00263859	0.00282919	NA	NA	NA
on.gene.LG1.1	E008	NA	0.0181282	NA	NA	0.0029011	NA	NA	NA	NA	NA	NA	NA	0.0032088	NA	NA
on.gene.LG1.100	E003	NA	NA	NA	0.0193392	0.0438728	NA	NA	NA	NA	0.0143116	0.000314872	0.00146528	NA	NA	NA
on.gene.LG1.100	E004	NA	NA	NA	NA	NA	NA	NA	NA	NA	NA	NA	0.0107688	0.0457805	NA	NA
on.gene.LG1.100	E005	NA	NA	NA	0.0276128	0.000590714	NA	NA	NA	NA	NA	NA	NA	0.00049226	NA	NA
on.gene.LG1.100	E006	NA	NA	NA	NA	NA	NA	NA	NA	NA	NA	NA	0.031853	NA	NA	NA
on.gene.LG1.100	E007	NA	0.00284597	NA	NA	NA	NA	NA	0.00105184	NA	NA	NA	NA	0.000786351	0.00914783	0.0158878
on.gene.LG1.101	E003	NA	NA	NA	NA	NA	NA	NA	NA	NA	NA	NA	0.0186153	NA	NA	NA
on.gene.LG1.102	E011	NA	NA	NA	NA	NA	NA	NA	NA	NA	NA	0.000638801	0.00112453	NA	NA	NA
on.gene.LG1.102	E013	NA	NA	NA	NA	0.0454259	NA	NA	NA	NA	NA	NA	0.0297646	NA	NA	NA
on.gene.LG1.103	E006	NA	NA	NA	NA	NA	NA	NA	NA	NA	0.0401862	NA	NA	NA	NA	NA
on.gene.LG1.104	E008	NA	NA	NA	NA	0.0490363	NA	NA	NA	NA	NA	NA	NA	NA	NA	NA
on.gene.LG1.104	E009	NA	NA	NA	NA	NA	NA	NA	NA	NA	NA	NA	0.0484454	NA	NA	NA
on.gene.LG1.105	E001	0.00814048	NA	NA	NA	NA	NA	0.0368068	NA	NA	NA	0.000139775	NA	NA	NA	0.00370037
on.gene.LG1.105	E002	NA	NA	NA	0.0141148	NA	NA	NA	NA	NA	NA	NA	NA	NA	NA	NA
on.gene.LG1.105	E003	NA	NA	NA	NA	NA	NA	NA	0.0457357	NA	NA	NA	0.0340143	NA	NA	NA
on.gene.LG1.105	E005	NA	NA	NA	0.0420797	0.00323048	NA	NA	0.00540827	0.0312616	NA	NA	NA	NA	NA	NA
on.gene.LG1.105	E006	NA	NA	NA	NA	0.00404446	NA	NA	NA	0.049989	NA	0.0149634	NA	NA	NA	NA
on.gene.LG1.105	E007	NA	NA	NA	0.0494606	NA	NA	NA	NA	NA	NA	NA	NA	NA	NA	NA
on.gene.LG1.105	E008	NA	NA	0.0099441	NA	0.000309715	NA	NA	NA	NA	0.0123257	NA	0.000285737	NA	NA	NA
on.gene.LG1.105	E009	NA	0.0310102	NA	0.000532534	NA	NA	NA	NA	NA	NA	0.00281596	NA	NA	NA	0.0182536
on.gene.LG1.106	E002	NA	NA	NA	NA	0.0338101	NA	NA	NA	NA	NA	NA	NA	NA	NA	NA
on.gene.LG1.106	E003	NA	NA	NA	NA	NA	NA	NA	NA	NA	NA	NA	0.0367724	0.0458414	NA	NA
on.gene.LG1.106	E004	NA	NA	NA	NA	NA	NA	0.0153703	NA	NA	NA	0.0241339	0.0228046	0.00380061	NA	NA
on.gene.LG1.106	E005	NA	NA	NA	NA	NA	NA	NA	NA	NA	NA	NA	NA	0.0208007	NA	NA
on.gene.LG1.106	E010	NA	NA	0.00629697	NA	0.010667	NA	NA	NA	NA	NA	0.00748673	NA	NA	NA	NA
on.gene.LG1.106	E011	NA	NA	NA	NA	0.0123039	NA	NA	NA	NA	NA	0.000802398	NA	NA	NA	NA
on.gene.LG1.106	E012	NA	NA	NA	0.0113506	NA	NA	NA	NA	NA	NA	0.00876298	NA	NA	NA	NA
on.gene.LG1.106	E024	NA	NA	NA	NA	0.00764477	NA	NA	NA	NA	NA	NA	0.000125316	0.00382823	NA	NA
on.gene.LG1.106	E025	NA	NA	NA	NA	NA	NA	NA	NA	NA	NA	NA	0.0184182	0.0091747	NA	NA
on.gene.LG1.108	E003	NA	NA	NA	NA	NA	NA	NA	NA	NA	NA	0.0169283	NA	NA	NA	NA
on.gene.LG1.108	E008	NA	NA	NA	NA	NA	NA	NA	NA	NA	NA	NA	NA	0.0233281	NA	NA
on.gene.LG1.108	E013	NA	NA	NA	0.0314964	NA	NA	NA	NA	NA	NA	NA	NA	NA	NA	NA
on.gene.LG1.109	E012	NA	NA	NA	NA	NA	NA	NA	NA	NA	0.0458174	NA	NA	NA	NA	NA
on.gene.LG1.109	E013	NA	NA	NA	NA	0.0160444	NA	NA	NA	NA	NA	NA	NA	NA	NA	NA
on.gene.LG1.11	E001	NA	NA	NA	NA	NA	NA	NA	NA	NA	NA	0.0406936	NA	NA	NA	NA
on.gene.LG1.11	E003	NA	NA	NA	NA	NA	NA	NA	NA	NA	NA	NA	0.0245169	NA	NA	NA
on.gene.LG1.110	E001	NA	NA	NA	NA	NA	NA	NA	NA	NA	NA	0.042502	0.0189204	0.000981941	NA	NA
on.gene.LG1.110	E002	NA	NA	NA	NA	NA	NA	NA	NA	NA	NA	0.000421803	0.0129491	0.000522308	NA	NA
on.gene.LG1.110	E004	NA	NA	NA	0.00273576	NA	NA	0.000152926	NA	NA	0.0359155	0.000204101	0.0318144	NA	NA	NA
on.gene.LG1.110	E006	NA	NA	NA	NA	0.025721	NA	0.00821471	NA	NA	0.00971856	NA	0.00103005	0.000248147	NA	NA
on.gene.LG1.110	E007	NA	NA	NA	0.047749	NA	NA	NA	NA	NA	0.0438807	0.00127411	0.0235894	0.00237528	NA	NA
on.gene.LG1.110	E008	NA	NA	NA	NA	NA	NA	NA	NA	NA	NA	0.0135256	0.0111763	0.00202773	NA	NA
on.gene.LG1.110	E009	NA	NA	NA	NA	NA	NA	NA	NA	NA	NA	NA	NA	0.00884031	NA	NA
on.gene.LG1.110	E010	NA	NA	NA	NA	NA	NA	NA	NA	0.0236785	NA	NA	NA	NA	0.0421027	NA
on.gene.LG1.111	E001	NA	NA	NA	NA	NA	NA	NA	NA	NA	NA	NA	0.024146	NA	NA	NA
on.gene.LG1.111	E006	NA	NA	NA	NA	NA	NA	NA	NA	NA	NA	NA	0.0383319	NA	NA	NA
on.gene.LG1.111	E010	NA	NA	NA	NA	NA	NA	NA	0.00720071	NA	NA	NA	NA	NA	NA	NA
on.gene.LG1.112	E007	NA	NA	NA	NA	NA	NA	NA	NA	NA	NA	0.0248956	NA	NA	NA	NA
on.gene.LG1.113	E005	NA	0.0159414	NA	NA	NA	NA	NA	NA	NA	NA	NA	NA	NA	NA	NA
on.gene.LG1.113	E006	NA	0.0059052	NA	NA	NA	NA	NA	NA	NA	NA	NA	NA	NA	NA	NA
on.gene.LG1.113	E017	NA	NA	NA	NA	0.0254607	NA	NA	NA	NA	NA	NA	0.00923208	NA	NA	NA
on.gene.LG1.118	E013	NA	0.0431031	NA	NA	NA	NA	NA	NA	NA	NA	NA	NA	NA	NA	0.0247346
on.gene.LG1.12	E002	NA	NA	NA	NA	NA	NA	NA	NA	NA	NA	NA	0.028877	NA	NA	NA
on.gene.LG1.12	E003	NA	NA	NA	NA	NA	NA	NA	NA	NA	0.0147749	0.0110932	NA	0.0363567	NA	NA
on.gene.LG1.12	E004	NA	NA	NA	NA	NA	NA	NA	NA	NA	0.00194518	NA	0.0175983	0.000185101	NA	NA
on.gene.LG1.12	E012	NA	NA	NA	NA	NA	NA	NA	NA	NA	NA	0.0309338	NA	0.0142543	NA	NA
on.gene.LG1.12	E014	NA	NA	NA	NA	NA	NA	NA	NA	NA	NA	NA	NA	0.0159038	NA	NA
on.gene.LG1.12	E016	NA	NA	NA	NA	NA	NA	NA	NA	NA	NA	0.0415446	NA	NA	NA	NA
on.gene.LG1.1210001	E014	NA	NA	NA	NA	NA	NA	NA	NA	NA	NA	NA	0.0266578	NA	NA	NA
on.gene.LG1.1210001	E015	NA	NA	NA	NA	0.0490816	NA	NA	NA	NA	NA	NA	0.00853567	NA	NA	NA
on.gene.LG1.126	E008	NA	NA	NA	NA	NA	NA	NA	0.000941846	NA	0.00467459	NA	NA	NA	0.0241458	NA
on.gene.LG1.126	E015	NA	NA	NA	NA	NA	NA	NA	NA	NA	NA	0.000112261	NA	0.0493223	NA	NA
on.gene.LG1.126	E022	NA	NA	NA	NA	NA	0.00428377	NA	NA	NA	NA	0.00659732	0.017121	NA	NA	NA
on.gene.LG1.126	E023	NA	NA	NA	NA	NA	0.026532	NA	NA	NA	NA	NA	NA	NA	NA	NA
on.gene.LG1.128	E008	NA	0.0147445	NA	NA	0.0233792	NA	NA	NA	NA	NA	NA	NA	NA	NA	NA
on.gene.LG1.129	E008	NA	NA	NA	NA	0.0143478	NA	NA	NA	NA	NA	NA	NA	NA	NA	NA
on.gene.LG1.132	E016	NA	NA	NA	NA	NA	NA	NA	NA	NA	NA	0.0125911	NA	NA	NA	NA
on.gene.LG1.1320001	E001	0.0370164	NA	NA	0.00284901	NA	NA	NA	NA	NA	NA	NA	NA	NA	NA	0.00075089
on.gene.LG1.1320001	E002	NA	NA	NA	NA	NA	NA	NA	NA	NA	NA	0.0310456	NA	NA	NA	NA
on.gene.LG1.1320001	E004	NA	NA	NA	NA	NA	NA	NA	NA	NA	NA	NA	NA	NA	NA	0.00309765
on.gene.LG1.1320001	E005	NA	NA	NA	0.00292891	0.0131712	NA	NA	NA	NA	NA	0.00152578	0.00795307	0.0364422	NA	NA
on.gene.LG1.135	E001	NA	0.000484257	NA	NA	0.00144705	NA	NA	0.0111593	NA	NA	NA	NA	NA	NA	NA
on.gene.LG1.135	E002	NA	0.018734	NA	NA	NA	NA	0.00625189	0.0143574	NA	NA	NA	NA	NA	0.00167344	0.00157254
on.gene.LG1.135	E004	NA	NA	NA	0.00675867	NA	NA	NA	NA	NA	NA	0.000774889	NA	NA	NA	NA
on.gene.LG1.135	E005	NA	0.00115197	NA	0.000771099	NA	NA	NA	NA	NA	NA	NA	NA	NA	NA	NA
on.gene.LG1.135	E006	NA	0.0435331	NA	0.0149289	NA	NA	NA	NA	NA	NA	0.000693314	NA	NA	NA	NA
on.gene.LG1.135	E010	NA	NA	NA	NA	NA	NA	NA	NA	NA	NA	NA	NA	0.00687201	NA	NA
on.gene.LG1.135	E012	NA	NA	NA	0.0141827	NA	NA	NA	NA	NA	NA	0.031632	NA	NA	NA	0.0358487
on.gene.LG1.135	E013	NA	0.0182945	NA	0.0314106	NA	NA	NA	NA	NA	NA	NA	NA	0.0410848	NA	0.00045697
on.gene.LG1.135	E015	NA	0.00236759	NA	NA	NA	NA	NA	NA	NA	NA	NA	0.0181547	0.0198429	NA	0.00370238
on.gene.LG1.135	E016	NA	0.00337352	NA	NA	NA	NA	NA	NA	NA	NA	NA	0.038414	NA	NA	NA
on.gene.LG1.135	E017	NA	0.000449478	NA	NA	NA	NA	NA	0.0382609	NA	NA	NA	0.000666855	NA	NA	NA
on.gene.LG1.136	E001	NA	NA	NA	NA	0.000246266	NA	NA	NA	NA	0.000199211	0.00316858	NA	NA	NA	NA
on.gene.LG1.136	E002	NA	NA	NA	NA	0.00125652	NA	NA	NA	NA	0.000562315	0.011486	NA	NA	NA	NA
on.gene.LG1.136	E003	NA	0.0107167	NA	NA	0.0217214	NA	NA	0.0449387	NA	NA	NA	NA	0.00390365	NA	NA
on.gene.LG1.136	E004	NA	0.00160409	NA	NA	NA	NA	NA	0.00778798	NA	NA	NA	0.00140106	NA	NA	NA
on.gene.LG1.136	E005	NA	0.0224332	NA	NA	0.00696726	NA	NA	0.0213674	NA	NA	NA	0.000123209	NA	NA	NA
on.gene.LG1.136	E006	NA	NA	NA	NA	NA	NA	NA	NA	NA	NA	NA	0.0200688	NA	NA	NA
on.gene.LG1.136	E009	NA	NA	NA	NA	NA	NA	NA	NA	NA	NA	NA	NA	0.0496588	NA	NA
on.gene.LG1.136	E010	NA	NA	NA	NA	NA	NA	NA	NA	NA	NA	NA	0.00322642	0.000210421	NA	NA
on.gene.LG1.136	E015	NA	0.0384656	NA	NA	NA	NA	NA	NA	NA	NA	0.038817	NA	NA	NA	NA
on.gene.LG1.136	E016	NA	0.0406995	NA	NA	NA	NA	NA	NA	NA	NA	0.0135276	NA	NA	NA	NA
on.gene.LG1.136	E020	NA	NA	NA	NA	NA	NA	NA	NA	NA	NA	0.0290669	NA	0.00909447	NA	NA
on.gene.LG1.136	E021	NA	NA	NA	NA	0.031927	NA	NA	NA	NA	NA	NA	0.000489929	NA	NA	NA
on.gene.LG1.136	E022	NA	NA	NA	NA	NA	NA	NA	NA	NA	NA	NA	0.00103571	NA	NA	NA
on.gene.LG1.136	E024	NA	NA	NA	NA	0.00291481	NA	NA	NA	NA	NA	0.0274646	NA	0.00824018	NA	NA
on.gene.LG1.136	E025	NA	NA	NA	NA	NA	NA	0.039287	NA	NA	0.0369296	0.0113052	NA	0.000274927	NA	NA
on.gene.LG1.136	E026	NA	NA	NA	NA	0.00217879	NA	NA	NA	NA	NA	NA	NA	0.0181282	NA	NA
on.gene.LG1.136	E027	NA	NA	NA	NA	NA	NA	NA	NA	NA	NA	NA	0.0159441	NA	NA	NA
on.gene.LG1.136	E028	NA	0.0127478	NA	NA	0.000794084	NA	0.00806008	0.00183947	NA	NA	NA	NA	0.000142284	0.0272673	NA
on.gene.LG1.136	E029	NA	NA	NA	NA	NA	NA	NA	NA	NA	NA	NA	0.0152144	NA	NA	NA
on.gene.LG1.136	E030	NA	NA	NA	NA	0.00598926	NA	NA	0.0300946	NA	NA	NA	NA	NA	NA	NA
on.gene.LG1.136	E031	NA	NA	NA	NA	0.005562	NA	NA	NA	NA	NA	NA	0.000379301	NA	NA	NA
on.gene.LG1.136	E032	NA	NA	NA	NA	NA	NA	NA	NA	NA	NA	NA	0.0130244	NA	NA	NA
on.gene.LG1.136	E033	NA	0.0326028	NA	NA	NA	NA	NA	NA	NA	NA	NA	0.00171527	NA	NA	NA
on.gene.LG1.136	E034	NA	0.0118372	NA	NA	0.0388893	NA	NA	NA	NA	NA	NA	0.000962089	0.0246996	NA	NA
on.gene.LG1.136	E035	NA	0.0154012	NA	NA	NA	NA	NA	NA	NA	NA	NA	0.000334185	NA	NA	0.0390649
on.gene.LG1.136	E036	NA	NA	NA	NA	NA	NA	NA	NA	NA	NA	NA	0.00311461	NA	NA	NA
on.gene.LG1.136	E037	NA	NA	NA	NA	NA	NA	NA	0.0318965	NA	NA	NA	0.00490788	0.00277743	NA	NA
on.gene.LG1.136	E038	NA	0.0459479	NA	NA	NA	NA	NA	0.0148845	NA	NA	NA	0.0189874	0.0226057	0.0392988	NA
on.gene.LG1.136	E039	NA	NA	NA	NA	NA	NA	NA	0.030237	NA	NA	NA	0.00719442	NA	NA	NA
on.gene.LG1.136	E042	NA	NA	NA	NA	NA	NA	NA	NA	NA	NA	NA	0.0226857	NA	NA	NA
on.gene.LG1.136	E043	NA	NA	NA	NA	NA	NA	NA	NA	NA	NA	NA	0.0293298	NA	NA	NA
on.gene.LG1.136	E044	NA	0.0124914	NA	NA	NA	NA	NA	NA	NA	NA	NA	0.0042741	NA	NA	NA
on.gene.LG1.136	E045	NA	NA	NA	NA	NA	NA	NA	NA	NA	NA	NA	0.012467	0.00347629	NA	NA
on.gene.LG1.136	E047	NA	NA	NA	NA	NA	NA	NA	NA	NA	NA	NA	0.0382473	NA	NA	NA
on.gene.LG1.137	E001	NA	0.0215092	NA	NA	NA	NA	NA	NA	NA	NA	NA	NA	NA	NA	NA
on.gene.LG1.137	E003	NA	0.000361733	NA	NA	NA	NA	NA	NA	NA	NA	0.0387616	NA	NA	NA	NA
on.gene.LG1.137	E004	NA	0.00178126	NA	0.000202046	NA	NA	NA	NA	NA	NA	NA	NA	NA	NA	NA
on.gene.LG1.137	E006	NA	NA	NA	0.000508831	NA	NA	NA	NA	NA	0.0232786	NA	0.00139692	0.0222136	NA	NA
on.gene.LG1.137	E007	NA	NA	NA	0.0199484	NA	NA	NA	NA	NA	NA	0.00039537	0.00291801	NA	NA	NA
on.gene.LG1.137	E010	NA	0.0134849	NA	0.0134556	NA	NA	NA	NA	NA	NA	NA	NA	NA	NA	NA
on.gene.LG1.137	E011	NA	NA	NA	NA	NA	NA	NA	NA	NA	NA	0.000736009	NA	NA	NA	NA
on.gene.LG1.137	E013	NA	0.00109517	NA	NA	NA	NA	NA	NA	NA	NA	NA	NA	NA	NA	0.0108932
on.gene.LG1.138	E001	NA	0.0205481	NA	0.000381142	NA	NA	0.00198004	NA	NA	NA	NA	NA	0.000371246	NA	NA
on.gene.LG1.138	E002	NA	NA	NA	0.000980597	NA	NA	0.0133421	NA	NA	NA	0.000341738	NA	0.0107762	NA	NA
on.gene.LG1.138	E008	NA	NA	NA	NA	NA	NA	NA	NA	NA	NA	0.00578523	NA	0.00827595	NA	NA
on.gene.LG1.138	E009	NA	NA	NA	0.0229728	NA	NA	NA	NA	NA	NA	0.0133091	NA	NA	NA	NA
on.gene.LG1.139	E001	NA	NA	NA	NA	NA	NA	NA	NA	NA	NA	NA	NA	NA	NA	0.0372205
on.gene.LG1.139	E002	NA	NA	NA	NA	NA	NA	NA	NA	NA	NA	NA	NA	NA	NA	0.0248596
on.gene.LG1.139	E004	NA	NA	0.0020825	NA	0.00123648	NA	NA	NA	NA	NA	NA	NA	0.00662851	NA	NA
on.gene.LG1.139	E005	NA	NA	NA	0.0322617	NA	NA	0.00836194	NA	NA	NA	0.0487423	NA	0.00874012	NA	NA
on.gene.LG1.139	E011	NA	NA	NA	NA	NA	NA	NA	NA	NA	NA	NA	NA	0.0110497	NA	NA
on.gene.LG1.139	E015	NA	0.00177626	NA	NA	NA	NA	NA	NA	NA	NA	NA	0.00228299	0.00465161	NA	0.00466031
on.gene.LG1.14	E001	NA	NA	NA	NA	0.0101642	NA	0.0146421	NA	NA	NA	0.0236875	NA	0.000112693	NA	NA
on.gene.LG1.14	E002	NA	NA	NA	NA	NA	NA	NA	NA	NA	NA	NA	0.0170928	NA	NA	NA
on.gene.LG1.14	E003	NA	NA	NA	NA	NA	NA	NA	0.0087639	NA	NA	NA	0.0030842	NA	NA	NA
on.gene.LG1.14	E004	NA	NA	NA	NA	0.0447076	NA	NA	0.02216	NA	NA	NA	0.000755134	NA	NA	NA
on.gene.LG1.14	E005	NA	NA	NA	NA	0.0196042	NA	NA	NA	NA	NA	NA	0.00184268	0.0214276	NA	NA
on.gene.LG1.14	E006	NA	NA	NA	NA	NA	NA	0.00273186	NA	NA	NA	0.00123938	0.00088899	0.019792	NA	NA
on.gene.LG1.14	E007	NA	NA	NA	NA	0.0225773	NA	NA	NA	NA	NA	NA	0.0233699	NA	NA	NA
on.gene.LG1.14	E008	NA	NA	NA	0.00937646	0.000315541	NA	NA	NA	NA	NA	NA	0.00906339	NA	NA	NA
on.gene.LG1.14	E009	NA	NA	NA	0.0308991	0.000969235	NA	NA	NA	NA	NA	NA	0.0111763	NA	NA	NA
on.gene.LG1.14	E010	NA	NA	NA	0.0342717	0.00305552	NA	NA	NA	NA	NA	0.0129391	0.000788062	NA	NA	NA
on.gene.LG1.14	E011	NA	NA	NA	0.0263739	0.0329413	NA	NA	NA	NA	NA	0.00279961	0.00709311	0.0256081	NA	NA
on.gene.LG1.14	E019	NA	NA	NA	0.0272554	0.0158695	NA	NA	NA	NA	NA	NA	NA	NA	NA	NA
on.gene.LG1.14	E022	NA	NA	NA	0.0174882	NA	NA	NA	0.0436442	NA	NA	NA	0.00138931	NA	NA	NA
on.gene.LG1.14	E024	NA	NA	NA	NA	0.0488869	NA	NA	NA	NA	NA	NA	NA	NA	NA	NA
on.gene.LG1.14	E025	NA	NA	NA	0.0403622	NA	NA	NA	NA	NA	NA	NA	NA	NA	NA	NA
on.gene.LG1.14	E034	NA	NA	NA	0.0336436	0.0457363	NA	NA	NA	NA	NA	NA	NA	NA	NA	NA
on.gene.LG1.14	E035	NA	NA	NA	NA	0.0243514	NA	NA	NA	NA	NA	NA	NA	NA	NA	NA
on.gene.LG1.14	E036	NA	NA	NA	NA	NA	NA	NA	NA	NA	NA	NA	0.0469161	NA	NA	NA
on.gene.LG1.14	E037	NA	NA	0.00455681	NA	NA	NA	0.00574555	NA	NA	NA	NA	0.00278577	NA	NA	NA
on.gene.LG1.14	E038	0.00569443	NA	NA	NA	NA	NA	NA	0.00879536	0.0149253	NA	NA	NA	NA	NA	0.00408098
on.gene.LG1.14	E039	NA	NA	NA	NA	NA	NA	NA	NA	NA	NA	0.0468892	NA	NA	NA	NA
on.gene.LG1.14	E040	NA	NA	NA	0.00840926	0.00818527	NA	NA	NA	NA	NA	0.0142328	0.0113616	NA	NA	NA
on.gene.LG1.14	E041	NA	NA	NA	0.0046853	NA	NA	NA	NA	NA	NA	NA	0.0110544	NA	NA	NA
on.gene.LG1.14	E042	NA	NA	NA	NA	0.000971238	NA	NA	NA	NA	NA	NA	NA	NA	NA	NA
on.gene.LG1.14	E043	NA	0.000234949	NA	NA	NA	NA	NA	0.0419592	NA	NA	NA	NA	NA	NA	NA
on.gene.LG1.14	E044	NA	NA	NA	NA	0.027907	NA	NA	NA	NA	NA	0.00743625	NA	NA	NA	NA
on.gene.LG1.140	E002	NA	NA	NA	NA	0.0271336	NA	0.00491309	NA	NA	NA	NA	0.00499131	0.000375375	NA	NA
on.gene.LG1.140	E003	NA	NA	NA	NA	NA	NA	NA	NA	NA	NA	NA	0.039782	NA	NA	NA
on.gene.LG1.140	E004	NA	NA	NA	NA	0.0171751	NA	0.048184	NA	NA	NA	0.00880042	NA	0.000189403	NA	NA
on.gene.LG1.140	E005	NA	NA	NA	NA	NA	NA	0.0379598	NA	NA	NA	NA	NA	0.0204181	NA	NA
on.gene.LG1.140	E006	NA	NA	NA	NA	NA	NA	0.0294679	NA	NA	NA	NA	NA	0.0195092	NA	NA
on.gene.LG1.140	E007	NA	NA	NA	NA	NA	NA	NA	NA	NA	NA	NA	0.022411	0.0168195	NA	NA
on.gene.LG1.140	E008	NA	NA	NA	NA	NA	NA	NA	NA	NA	NA	NA	NA	0.040569	NA	NA
on.gene.LG1.140	E017	NA	NA	NA	NA	0.00924727	NA	NA	NA	NA	NA	NA	NA	NA	NA	NA
on.gene.LG1.140	E019	NA	NA	NA	NA	NA	NA	NA	NA	NA	NA	0.0194438	NA	NA	NA	NA
on.gene.LG1.140	E020	NA	NA	NA	NA	0.0345498	NA	NA	NA	NA	NA	NA	0.00918224	NA	NA	NA
on.gene.LG1.140	E022	NA	NA	NA	NA	NA	NA	NA	NA	NA	NA	0.0226513	NA	NA	NA	NA
on.gene.LG1.140	E023	NA	NA	NA	0.0158426	NA	NA	NA	NA	NA	NA	0.000799374	NA	NA	NA	NA
on.gene.LG1.140	E026	NA	NA	NA	NA	NA	NA	0.0242715	NA	NA	NA	NA	NA	0.015383	NA	NA
on.gene.LG1.140	E028	NA	NA	NA	NA	0.0445518	NA	NA	NA	NA	NA	NA	NA	NA	NA	NA
on.gene.LG1.140	E029	NA	NA	NA	NA	NA	NA	NA	NA	NA	NA	NA	0.0263449	NA	NA	NA
on.gene.LG1.140	E030	NA	NA	NA	NA	NA	NA	NA	NA	NA	NA	NA	0.0285817	0.00439819	NA	NA
on.gene.LG1.140	E033	NA	NA	NA	NA	NA	NA	NA	NA	NA	NA	NA	NA	0.0322954	NA	NA
on.gene.LG1.141	E001	NA	NA	NA	0.0116764	NA	NA	0.0150294	NA	NA	NA	NA	NA	NA	NA	NA
on.gene.LG1.141	E003	NA	NA	0.0037359	0.0090012	NA	NA	0.0079102	NA	NA	NA	NA	NA	NA	NA	NA
on.gene.LG1.141	E008	NA	NA	NA	0.0336231	NA	NA	NA	NA	NA	NA	0.00438264	NA	NA	NA	NA
on.gene.LG1.141	E012	NA	NA	0.0409986	0.00351089	0.0271591	NA	NA	NA	NA	NA	0.00464846	NA	NA	NA	NA
on.gene.LG1.142	E012	NA	NA	NA	NA	NA	NA	NA	NA	NA	NA	NA	0.0327897	NA	NA	NA
on.gene.LG1.142	E018	NA	NA	NA	NA	NA	NA	NA	NA	NA	0.0276894	NA	NA	NA	NA	NA
on.gene.LG1.142	E021	NA	NA	NA	0.0350957	NA	NA	NA	NA	NA	NA	0.026205	NA	0.033905	NA	NA
on.gene.LG1.142	E024	NA	NA	NA	NA	NA	NA	NA	NA	NA	NA	0.000762003	NA	0.000832064	NA	NA
on.gene.LG1.143	E002	NA	NA	NA	NA	NA	NA	NA	NA	NA	NA	NA	0.0141218	NA	NA	NA
on.gene.LG1.143	E004	NA	NA	NA	NA	NA	NA	NA	NA	NA	0.00356198	NA	0.0325639	0.0475662	NA	NA
on.gene.LG1.143	E007	NA	NA	NA	NA	NA	NA	0.0118915	NA	NA	NA	NA	0.0324226	0.00289928	NA	NA
on.gene.LG1.143	E009	NA	NA	NA	0.000883496	0.000102489	NA	NA	NA	NA	0.00739719	NA	NA	NA	NA	NA
on.gene.LG1.143	E013	NA	NA	NA	NA	NA	NA	0.0021646	NA	NA	NA	NA	NA	0.00449135	NA	NA
on.gene.LG1.143	E014	NA	NA	0.047403	0.0144735	0.00533645	NA	NA	NA	NA	NA	NA	NA	0.000416936	NA	NA
on.gene.LG1.143	E015	NA	NA	NA	0.00564126	0.00112686	NA	NA	NA	NA	NA	NA	0.0219258	0.000342217	NA	NA
on.gene.LG1.143	E016	NA	NA	NA	NA	NA	NA	NA	NA	NA	NA	NA	NA	0.0303192	NA	0.0474634
on.gene.LG1.144	E001	NA	NA	NA	NA	NA	NA	NA	NA	NA	0.03868	NA	0.00298029	NA	NA	NA
on.gene.LG1.144	E002	NA	NA	NA	NA	0.00949263	NA	NA	NA	NA	NA	NA	0.000147822	0.00982348	NA	NA
on.gene.LG1.144	E003	NA	NA	NA	NA	NA	NA	NA	NA	NA	NA	NA	0.0486342	0.0210387	NA	NA
on.gene.LG1.144	E004	NA	NA	NA	NA	NA	NA	NA	NA	NA	0.0143939	0.0146311	0.0431631	NA	NA	NA
on.gene.LG1.144	E005	NA	NA	NA	NA	NA	NA	NA	NA	NA	NA	NA	NA	0.00156371	NA	NA
on.gene.LG1.144	E006	NA	NA	NA	NA	NA	NA	NA	NA	NA	NA	NA	NA	0.0422634	NA	NA
on.gene.LG1.144	E007	NA	0.00829881	0.0119491	NA	NA	NA	NA	NA	NA	0.000214065	0.00527878	NA	NA	NA	0.00656816
on.gene.LG1.144	E008	NA	NA	0.0341617	NA	0.0118583	NA	0.0226798	NA	NA	NA	NA	0.0297097	0.0477398	NA	NA
on.gene.LG1.144	E012	NA	NA	NA	NA	NA	NA	NA	NA	NA	NA	NA	NA	0.0353866	NA	NA
on.gene.LG1.144	E013	NA	NA	NA	NA	NA	NA	NA	NA	NA	NA	NA	NA	0.00457439	NA	0.044856
on.gene.LG1.144	E014	NA	NA	NA	NA	NA	NA	NA	NA	0.0486356	NA	NA	NA	NA	NA	0.0256495
on.gene.LG1.144	E020	NA	NA	NA	0.0103355	NA	NA	NA	NA	NA	NA	0.00556692	NA	NA	NA	NA
on.gene.LG1.144	E021	NA	NA	NA	NA	NA	NA	NA	NA	NA	0.0203286	NA	NA	NA	NA	NA
on.gene.LG1.144	E030	NA	NA	NA	NA	NA	NA	0.0171413	NA	NA	NA	0.0400992	NA	0.00508371	NA	NA
on.gene.LG1.144	E031	NA	NA	NA	NA	NA	NA	0.00291086	NA	0.0327404	NA	0.0316379	NA	0.000211361	0.0466201	NA
on.gene.LG1.144	E032	NA	NA	NA	NA	NA	NA	NA	NA	0.0472019	NA	NA	NA	NA	NA	NA
on.gene.LG1.144	E033	NA	NA	NA	NA	NA	NA	NA	NA	0.0190235	NA	NA	0.00598546	NA	NA	NA
on.gene.LG1.144	E034	NA	NA	NA	NA	NA	NA	NA	NA	0.0356414	NA	NA	NA	NA	NA	NA
on.gene.LG1.144	E035	NA	NA	NA	NA	NA	NA	NA	NA	NA	NA	NA	NA	0.000391738	NA	0.0404315
on.gene.LG1.144	E036	NA	NA	NA	NA	NA	NA	NA	NA	NA	NA	NA	0.0379043	NA	NA	NA
on.gene.LG1.144	E038	NA	NA	NA	NA	NA	NA	NA	NA	NA	NA	NA	NA	0.00710361	NA	NA
on.gene.LG1.145	E008	NA	NA	NA	NA	NA	NA	NA	NA	NA	NA	0.0365477	NA	NA	NA	NA
on.gene.LG1.147	E005	NA	NA	NA	NA	NA	NA	NA	NA	NA	NA	0.0283728	NA	NA	NA	NA
on.gene.LG1.147	E006	NA	NA	NA	NA	NA	NA	NA	NA	NA	NA	NA	0.0250116	0.0212509	NA	NA
on.gene.LG1.147	E008	NA	NA	NA	NA	NA	NA	NA	NA	NA	NA	0.0495009	NA	NA	NA	NA
on.gene.LG1.147	E009	NA	NA	NA	0.049499	NA	NA	NA	NA	NA	0.0422431	0.00136831	NA	NA	NA	NA
on.gene.LG1.148	E002	NA	NA	NA	NA	NA	NA	NA	NA	NA	NA	NA	0.00310654	0.0489402	NA	NA
on.gene.LG1.149	E002	NA	NA	NA	NA	NA	NA	NA	NA	NA	NA	0.0254422	NA	NA	NA	NA
on.gene.LG1.149	E006	NA	NA	NA	NA	NA	NA	NA	NA	NA	NA	NA	0.0275043	NA	NA	NA
on.gene.LG1.149	E008	NA	NA	NA	NA	0.00868667	NA	NA	NA	NA	NA	NA	NA	NA	NA	NA
on.gene.LG1.150	E001	NA	NA	NA	NA	0.0019782	NA	NA	NA	NA	NA	NA	NA	NA	NA	NA
on.gene.LG1.150	E002	NA	0.047324	NA	NA	0.019286	NA	NA	NA	0.0475316	NA	NA	0.045996	NA	NA	NA
on.gene.LG1.150	E010	NA	0.00636715	NA	NA	NA	NA	NA	0.0192232	NA	NA	NA	NA	0.0125463	NA	NA
on.gene.LG1.151	E007	NA	NA	NA	NA	NA	NA	NA	NA	NA	NA	NA	0.00629593	NA	NA	NA
on.gene.LG1.151	E012	NA	NA	0.0450309	NA	NA	NA	NA	NA	NA	NA	NA	NA	NA	NA	NA
on.gene.LG1.151	E019	NA	NA	NA	0.00652219	0.0042375	NA	0.00499992	NA	NA	NA	0.000127101	NA	NA	NA	NA
on.gene.LG1.159	E003	NA	0.0250247	NA	NA	0.00291518	NA	NA	NA	NA	0.00244764	0.0332689	NA	0.0301431	NA	NA
on.gene.LG1.159	E005	NA	NA	NA	NA	0.014411	NA	NA	NA	NA	NA	NA	0.00540587	NA	NA	NA
on.gene.LG1.16	E002	NA	NA	0.0266217	NA	NA	NA	0.0434695	NA	NA	NA	NA	NA	NA	NA	NA
on.gene.LG1.16	E003	NA	NA	NA	NA	NA	NA	0.0383783	NA	NA	NA	NA	NA	NA	NA	NA
on.gene.LG1.16	E008	NA	NA	NA	NA	NA	NA	NA	NA	NA	NA	NA	NA	0.0268269	NA	NA
on.gene.LG1.16	E021	NA	NA	NA	NA	NA	NA	NA	NA	NA	NA	0.00421866	NA	NA	NA	NA
on.gene.LG1.16	E023	NA	0.022665	NA	NA	NA	NA	NA	NA	NA	NA	NA	0.00666637	NA	NA	NA
on.gene.LG1.16	E026	NA	NA	NA	NA	NA	NA	NA	NA	NA	0.0194058	NA	0.039943	0.000415558	NA	NA
on.gene.LG1.16	E027	NA	NA	NA	0.0221612	NA	NA	0.0019661	NA	NA	NA	NA	NA	NA	NA	NA
on.gene.LG1.16	E028	NA	NA	NA	NA	NA	NA	0.0146362	NA	NA	NA	NA	NA	0.0340574	NA	NA
on.gene.LG1.166	E001	NA	NA	NA	NA	0.0270797	NA	0.0163314	NA	NA	NA	NA	NA	NA	NA	NA
on.gene.LG1.166	E002	NA	0.00559826	NA	NA	NA	NA	NA	NA	NA	NA	NA	0.0323707	NA	NA	NA
on.gene.LG1.166	E003	NA	0.0441682	NA	NA	NA	NA	NA	NA	NA	NA	NA	NA	NA	NA	NA
on.gene.LG1.166	E006	NA	NA	NA	NA	NA	NA	NA	0.0429293	NA	NA	NA	NA	NA	NA	NA
on.gene.LG1.166	E013	NA	NA	0.00866136	0.000224253	0.00973388	NA	0.0368779	NA	NA	NA	0.034337	NA	NA	NA	NA
on.gene.LG1.167	E004	NA	NA	NA	NA	0.0395856	NA	NA	NA	NA	NA	NA	NA	NA	NA	NA
on.gene.LG1.167	E010	NA	NA	NA	NA	NA	NA	NA	NA	NA	0.0455984	NA	NA	NA	NA	NA
on.gene.LG1.168	E001	NA	NA	NA	NA	NA	NA	NA	NA	NA	0.0123339	0.0456963	0.00572423	NA	NA	0.0187
on.gene.LG1.168	E013	NA	NA	NA	NA	0.0194865	NA	NA	NA	NA	NA	NA	NA	NA	NA	NA
on.gene.LG1.168	E014	NA	NA	0.00531825	NA	0.0115408	NA	NA	NA	NA	NA	NA	NA	NA	NA	NA
on.gene.LG1.168	E020	NA	NA	NA	NA	NA	NA	NA	NA	NA	NA	0.0165625	0.00899827	NA	NA	NA
on.gene.LG1.168	E021	NA	NA	0.0111104	NA	NA	NA	NA	NA	NA	NA	NA	NA	NA	NA	NA
on.gene.LG1.169	E001	NA	NA	NA	0.035091	NA	NA	NA	NA	NA	NA	0.0400612	NA	NA	NA	NA
on.gene.LG1.169	E003	NA	0.0408825	NA	NA	NA	NA	NA	NA	NA	NA	NA	0.00190908	NA	NA	NA
on.gene.LG1.169	E009	NA	0.0270523	NA	NA	NA	NA	NA	NA	NA	NA	NA	NA	0.0123696	NA	NA
on.gene.LG1.17	E001	NA	NA	NA	NA	NA	NA	NA	NA	0.0325973	NA	NA	NA	NA	NA	0.0121172
on.gene.LG1.17	E003	NA	NA	NA	0.00188298	NA	NA	NA	0.0176393	NA	NA	0.0127453	NA	NA	NA	NA
on.gene.LG1.17	E005	NA	NA	NA	0.0301858	NA	NA	NA	NA	NA	NA	NA	0.0296008	NA	NA	0.0133073
on.gene.LG1.17	E006	0.0051263	NA	NA	NA	0.0134887	NA	NA	NA	NA	NA	NA	0.0178675	NA	NA	0.0135779
on.gene.LG1.17	E007	NA	NA	0.0198082	NA	NA	NA	NA	NA	NA	0.00603394	NA	NA	0.040902	NA	NA
on.gene.LG1.17	E008	NA	NA	NA	NA	NA	NA	NA	NA	NA	NA	NA	0.0485643	NA	NA	NA
on.gene.LG1.17	E013	NA	NA	NA	NA	NA	NA	NA	NA	NA	NA	0.0231259	NA	NA	NA	NA
on.gene.LG1.17	E016	NA	NA	NA	NA	NA	NA	0.0238988	NA	NA	0.0153097	0.00447413	NA	0.001446	NA	NA
on.gene.LG1.17	E018	NA	NA	NA	NA	0.00841846	NA	NA	NA	NA	NA	NA	0.00112481	NA	NA	NA
on.gene.LG1.17	E019	NA	NA	NA	NA	NA	NA	NA	NA	NA	NA	NA	0.00397007	NA	NA	NA
on.gene.LG1.17	E021	NA	0.036772	NA	NA	NA	NA	NA	NA	NA	NA	NA	NA	NA	NA	NA
on.gene.LG1.170	E001	NA	NA	NA	0.0160698	NA	NA	0.0278445	NA	NA	NA	NA	NA	NA	NA	NA
on.gene.LG1.170	E008	NA	NA	NA	NA	NA	NA	NA	NA	NA	NA	0.0116229	0.0476051	NA	NA	NA
on.gene.LG1.171	E001	0.00402998	NA	NA	NA	NA	NA	NA	NA	NA	NA	0.038869	NA	NA	NA	NA
on.gene.LG1.171	E008	NA	NA	NA	NA	NA	NA	NA	NA	NA	NA	0.0310847	NA	NA	NA	NA
on.gene.LG1.172	E008	NA	NA	NA	NA	NA	NA	NA	NA	NA	NA	NA	0.0360802	NA	NA	NA
on.gene.LG1.173	E001	NA	NA	NA	NA	NA	NA	0.0230724	NA	NA	NA	NA	NA	0.00110557	NA	0.0137876
on.gene.LG1.173	E002	NA	NA	NA	NA	NA	NA	NA	NA	NA	NA	NA	NA	0.0431303	NA	NA
on.gene.LG1.173	E018	NA	NA	NA	NA	NA	NA	NA	NA	NA	NA	NA	NA	0.0240036	NA	NA
on.gene.LG1.177	E001	NA	NA	NA	NA	NA	NA	NA	NA	NA	NA	0.0390216	NA	NA	NA	NA
on.gene.LG1.177	E002	NA	NA	NA	NA	0.0398298	NA	NA	NA	NA	NA	NA	NA	NA	NA	NA
on.gene.LG1.177	E004	NA	NA	NA	NA	NA	NA	NA	NA	NA	NA	NA	0.0110626	NA	NA	NA
on.gene.LG1.177	E006	NA	NA	0.0345595	0.00996051	0.00766956	NA	0.0138177	NA	NA	0.0117819	0.00178253	0.00111323	0.00151805	NA	NA
on.gene.LG1.177	E008	NA	NA	NA	NA	0.0102345	NA	NA	NA	NA	NA	NA	0.0260342	NA	NA	NA
on.gene.LG1.177	E010	NA	NA	NA	NA	0.00027698	NA	NA	NA	NA	0.0417516	NA	NA	NA	NA	NA
on.gene.LG1.177	E012	NA	NA	NA	0.0453546	0.00638035	NA	NA	NA	NA	NA	0.0251023	0.00185082	NA	NA	NA
on.gene.LG1.177	E013	NA	NA	0.000699814	NA	NA	NA	0.00220216	NA	NA	0.0115627	0.000913877	NA	0.01761	NA	NA
on.gene.LG1.177	E014	NA	NA	0.0111845	0.000100704	NA	NA	NA	NA	NA	NA	0.00302497	NA	NA	NA	NA
on.gene.LG1.177	E015	NA	NA	NA	0.00294109	0.0248379	NA	NA	NA	NA	NA	0.0323201	NA	NA	NA	NA
on.gene.LG1.178	E004	NA	NA	NA	NA	0.00108536	NA	NA	NA	NA	NA	NA	0.000424712	NA	NA	NA
on.gene.LG1.178	E012	NA	NA	NA	NA	NA	NA	NA	NA	NA	NA	0.010134	NA	NA	NA	NA
on.gene.LG1.178	E013	NA	NA	NA	NA	NA	NA	NA	NA	NA	NA	0.0207263	NA	NA	NA	NA
on.gene.LG1.179	E001	NA	NA	NA	NA	NA	NA	NA	NA	NA	NA	NA	0.0220604	NA	NA	NA
on.gene.LG1.179	E002	NA	NA	NA	NA	NA	NA	NA	NA	NA	NA	NA	0.0475717	NA	NA	NA
on.gene.LG1.179	E024	NA	NA	NA	NA	NA	NA	NA	NA	NA	NA	NA	NA	0.0259278	NA	NA
on.gene.LG1.179	E025	NA	NA	NA	NA	NA	NA	NA	NA	NA	NA	0.01913	NA	NA	NA	NA
on.gene.LG1.18	E002	NA	NA	NA	NA	NA	NA	NA	NA	NA	NA	NA	0.00304935	NA	NA	NA
on.gene.LG1.18	E003	NA	0.000131755	NA	NA	0.00995487	NA	NA	NA	0.0104447	0.0233184	NA	NA	NA	NA	NA
on.gene.LG1.18	E004	NA	0.002094	NA	NA	NA	NA	NA	NA	NA	NA	NA	0.000270416	NA	NA	NA
on.gene.LG1.18	E005	NA	0.0312515	NA	NA	NA	NA	NA	NA	NA	NA	NA	0.00109533	NA	NA	NA
on.gene.LG1.18	E006	NA	NA	NA	NA	NA	0.0162889	NA	NA	NA	NA	NA	0.00190524	NA	NA	NA
on.gene.LG1.18	E007	NA	NA	NA	NA	NA	NA	NA	0.0211682	NA	NA	NA	0.00154315	NA	NA	NA
on.gene.LG1.18	E008	NA	0.0100222	NA	NA	NA	NA	NA	0.00146343	NA	NA	NA	NA	NA	NA	NA
on.gene.LG1.18	E009	NA	0.00164713	NA	NA	0.0051325	NA	NA	0.00588846	NA	NA	NA	NA	NA	NA	NA
on.gene.LG1.18	E010	NA	0.000457787	NA	NA	0.0112054	NA	NA	0.0115534	0.000379663	NA	NA	NA	NA	NA	NA
on.gene.LG1.18	E011	NA	0.00463449	NA	NA	NA	NA	NA	NA	0.0001087	NA	NA	NA	NA	NA	NA
on.gene.LG1.18	E012	NA	NA	NA	NA	NA	NA	NA	NA	0.0128018	NA	NA	0.000377943	NA	NA	NA
on.gene.LG1.18	E013	NA	0.00531194	NA	NA	NA	NA	0.0453069	NA	NA	NA	NA	NA	NA	NA	NA
on.gene.LG1.18	E015	NA	NA	0.0423927	0.0090012	NA	NA	0.000990938	NA	0.000171046	0.0398806	0.00646616	NA	0.000470003	NA	NA
on.gene.LG1.18	E017	NA	NA	NA	0.0103588	NA	NA	NA	NA	NA	0.000104433	NA	NA	NA	NA	NA
on.gene.LG1.18	E019	NA	NA	NA	NA	NA	NA	NA	NA	0.00739302	NA	NA	NA	NA	NA	0.019135
on.gene.LG1.180	E001	NA	0.00433022	NA	NA	0.0297064	NA	NA	NA	NA	NA	NA	0.00259868	NA	NA	NA
on.gene.LG1.180	E009	NA	NA	NA	NA	NA	NA	NA	NA	NA	0.0444257	NA	NA	NA	NA	NA
on.gene.LG1.180	E023	NA	NA	NA	NA	NA	NA	NA	NA	NA	NA	NA	0.0223075	NA	NA	NA
on.gene.LG1.180	E025	NA	NA	NA	NA	NA	NA	NA	NA	NA	NA	NA	0.0102008	NA	NA	NA
on.gene.LG1.180	E029	NA	NA	NA	0.0284262	0.0457363	NA	NA	NA	NA	NA	0.000633729	0.00371167	NA	NA	NA
on.gene.LG1.180	E030	NA	NA	NA	0.0145158	NA	NA	NA	NA	NA	0.0111545	0.000107644	NA	NA	NA	NA
on.gene.LG1.182	E001	NA	NA	NA	NA	NA	NA	NA	NA	NA	NA	0.0347279	0.000294199	NA	NA	NA
on.gene.LG1.182	E005	NA	NA	NA	0.0131585	0.00533241	NA	NA	NA	NA	NA	NA	NA	NA	NA	NA
on.gene.LG1.184	E001	NA	NA	NA	NA	NA	NA	NA	0.0282921	NA	0.0255206	NA	NA	NA	0.00223093	0.0240466
on.gene.LG1.185	E002	NA	0.0187003	NA	NA	NA	NA	0.001366	NA	NA	0.0378785	0.000933026	NA	NA	0.0024088	NA
on.gene.LG1.187	E001	NA	NA	NA	0.00880771	NA	NA	NA	NA	NA	NA	0.000118807	NA	NA	NA	NA
on.gene.LG1.187	E003	NA	NA	NA	NA	0.0186169	NA	NA	NA	NA	NA	0.000205913	NA	NA	NA	NA
on.gene.LG1.188	E001	NA	NA	NA	NA	NA	NA	NA	NA	0.00121967	NA	NA	NA	NA	NA	0.0467119
on.gene.LG1.188	E002	NA	NA	NA	NA	NA	NA	NA	NA	NA	NA	NA	NA	0.0229408	NA	NA
on.gene.LG1.188	E004	NA	NA	NA	NA	NA	NA	NA	NA	0.046695	NA	NA	NA	0.00774997	NA	NA
on.gene.LG1.190	E001	NA	NA	NA	0.00781282	NA	NA	NA	NA	NA	NA	0.00787213	NA	NA	NA	0.00408335
on.gene.LG1.190	E003	NA	NA	NA	0.00114859	0.0112474	NA	NA	NA	NA	NA	0.0280612	NA	NA	NA	0.00911555
on.gene.LG1.190	E004	NA	NA	NA	NA	NA	0.0431972	NA	NA	NA	NA	NA	NA	NA	NA	NA
on.gene.LG1.192	E002	NA	NA	NA	NA	NA	NA	NA	NA	NA	NA	NA	NA	0.0294071	NA	NA
on.gene.LG1.194	E004	NA	NA	NA	NA	0.0464723	NA	0.0455035	NA	NA	NA	NA	0.0294435	0.0252496	NA	NA
on.gene.LG1.194	E005	NA	NA	NA	NA	NA	NA	0.0175836	NA	NA	NA	NA	NA	0.0196523	NA	NA
on.gene.LG1.194	E011	NA	NA	NA	NA	NA	NA	NA	NA	NA	NA	NA	0.0155598	NA	NA	NA
on.gene.LG1.194	E015	NA	NA	NA	NA	NA	NA	NA	NA	NA	NA	0.00881081	0.00124728	NA	NA	NA
on.gene.LG1.194	E016	NA	NA	NA	NA	0.0336076	NA	NA	NA	NA	NA	NA	0.0109916	NA	NA	NA
on.gene.LG1.194	E017	NA	NA	NA	NA	0.019711	NA	NA	NA	NA	NA	NA	0.0490232	NA	NA	NA
on.gene.LG1.194	E028	NA	NA	NA	NA	0.0353116	NA	NA	NA	NA	NA	NA	NA	NA	NA	NA
on.gene.LG1.194	E030	NA	NA	NA	NA	NA	NA	NA	NA	NA	NA	NA	NA	0.00815832	NA	NA
on.gene.LG1.194	E032	NA	NA	NA	NA	NA	NA	0.0224662	NA	NA	NA	0.00798337	NA	NA	NA	0.0328738
on.gene.LG1.194	E034	NA	NA	NA	NA	NA	NA	NA	NA	NA	NA	NA	0.0327821	NA	NA	NA
on.gene.LG1.194	E036	NA	NA	NA	NA	0.00831423	NA	NA	NA	NA	0.0140454	NA	0.000290436	0.00543486	NA	NA
on.gene.LG1.194	E037	NA	NA	NA	NA	0.049369	NA	0.0485487	NA	NA	0.000862522	NA	0.00237868	0.00213006	NA	NA
on.gene.LG1.1970001	E001	NA	NA	NA	NA	NA	NA	NA	NA	NA	NA	NA	0.0426656	NA	NA	NA
on.gene.LG1.198	E001	0.020996	0.000265785	0.022139	NA	0.0456057	NA	0.000178417	NA	NA	0.00106022	NA	0.00158021	NA	NA	NA
on.gene.LG1.198	E002	NA	NA	0.00133423	NA	NA	NA	0.000980846	NA	NA	0.00189542	NA	NA	0.00057768	NA	NA
on.gene.LG1.198	E003	NA	NA	0.00776737	NA	0.000166482	NA	0.000230818	NA	NA	0.000173604	NA	NA	NA	NA	NA
on.gene.LG1.198	E004	0.0145471	0.00115802	NA	NA	NA	NA	NA	NA	NA	NA	NA	NA	NA	NA	NA
on.gene.LG1.199	E005	NA	NA	NA	NA	0.0426351	NA	NA	NA	NA	NA	NA	NA	NA	NA	NA
on.gene.LG1.2	E004	NA	NA	NA	NA	0.032426	NA	NA	NA	NA	NA	NA	NA	NA	NA	NA
on.gene.LG1.2	E012	NA	NA	NA	NA	NA	NA	NA	NA	NA	NA	NA	0.0482143	NA	NA	NA
on.gene.LG1.20	E003	NA	NA	NA	NA	NA	NA	NA	NA	NA	NA	NA	0.0357273	NA	NA	NA
on.gene.LG1.20	E004	NA	NA	NA	NA	NA	NA	NA	NA	0.0119548	NA	NA	0.044012	NA	NA	NA
on.gene.LG1.20	E014	NA	NA	NA	NA	NA	NA	NA	NA	NA	NA	NA	NA	NA	NA	0.0409028
on.gene.LG1.202	E001	NA	0.00505551	NA	0.00018822	NA	NA	NA	NA	NA	NA	0.00101563	NA	NA	NA	NA
on.gene.LG1.202	E002	NA	0.0168681	NA	0.000102443	NA	NA	NA	NA	NA	NA	0.000865141	NA	NA	NA	NA
on.gene.LG1.202	E003	NA	NA	NA	0.0069836	NA	NA	NA	NA	NA	NA	0.0492868	NA	NA	NA	NA
on.gene.LG1.202	E014	NA	NA	NA	NA	NA	NA	NA	NA	NA	NA	NA	NA	NA	NA	0.0422157
on.gene.LG1.202	E023	NA	0.0435241	NA	NA	NA	NA	NA	NA	NA	NA	NA	NA	NA	NA	NA
on.gene.LG1.204	E001	NA	NA	NA	0.00279881	0.0144974	NA	NA	NA	NA	NA	NA	NA	0.0210333	NA	NA
on.gene.LG1.204	E002	NA	NA	NA	NA	NA	NA	NA	NA	NA	NA	NA	0.00104012	NA	NA	NA
on.gene.LG1.204	E003	NA	NA	NA	NA	NA	NA	NA	NA	NA	NA	0.0125786	NA	NA	NA	NA
on.gene.LG1.204	E007	NA	NA	NA	NA	NA	NA	NA	NA	NA	NA	0.00427307	NA	NA	NA	NA
on.gene.LG1.204	E011	NA	NA	NA	NA	NA	NA	NA	NA	NA	NA	NA	0.00682196	NA	NA	NA
on.gene.LG1.204	E016	NA	0.0218481	NA	NA	NA	NA	NA	NA	NA	NA	NA	0.00071785	NA	NA	NA
on.gene.LG1.205	E003	NA	NA	NA	NA	NA	NA	NA	NA	NA	NA	0.0236692	NA	NA	NA	NA
on.gene.LG1.207	E004	NA	NA	NA	NA	NA	NA	NA	NA	NA	0.0229139	NA	0.0220357	NA	NA	NA
on.gene.LG1.207	E005	NA	NA	NA	NA	NA	NA	NA	NA	NA	0.00816932	NA	NA	NA	NA	NA
on.gene.LG1.207	E013	NA	NA	0.0146693	NA	0.0220644	NA	NA	NA	NA	0.0062369	NA	0.0067656	NA	NA	NA
on.gene.LG1.207	E014	NA	NA	0.00515793	NA	NA	NA	0.00482735	NA	NA	NA	NA	NA	0.0270081	NA	NA
on.gene.LG1.208	E001	NA	NA	0.0379276	NA	0.0038532	NA	NA	NA	NA	NA	NA	0.038025	NA	NA	NA
on.gene.LG1.208	E005	NA	NA	NA	NA	NA	NA	NA	NA	NA	NA	NA	NA	0.0467312	NA	NA
on.gene.LG1.208	E006	NA	NA	NA	0.0377151	0.040248	NA	NA	NA	NA	NA	NA	NA	NA	NA	NA
on.gene.LG1.208	E007	NA	NA	NA	0.00663707	0.00977306	NA	NA	NA	NA	NA	0.00670467	0.00699544	NA	NA	NA
on.gene.LG1.209	E001	NA	NA	NA	NA	NA	NA	NA	NA	NA	0.0405002	NA	NA	NA	NA	NA
on.gene.LG1.209	E003	NA	NA	NA	NA	NA	NA	NA	NA	NA	NA	NA	0.0234275	NA	NA	NA
on.gene.LG1.209	E011	NA	NA	NA	NA	NA	NA	NA	NA	NA	NA	NA	0.0385527	NA	NA	NA
on.gene.LG1.21	E001	NA	0.0449665	NA	NA	NA	NA	NA	0.0184473	NA	NA	NA	NA	NA	NA	NA
on.gene.LG1.21	E003	NA	NA	NA	NA	NA	NA	NA	NA	NA	NA	0.00561332	0.0149254	0.000119533	NA	NA
on.gene.LG1.21	E005	NA	NA	0.0477336	NA	NA	NA	NA	0.036404	NA	0.0392935	NA	NA	NA	NA	NA
on.gene.LG1.21	E007	NA	NA	NA	NA	NA	NA	NA	NA	NA	NA	NA	0.0293587	NA	NA	NA
on.gene.LG1.211	E001	NA	NA	NA	0.0112083	NA	NA	NA	NA	NA	NA	0.00733204	NA	NA	NA	NA
on.gene.LG1.211	E003	NA	0.0460118	NA	NA	NA	NA	NA	NA	NA	NA	NA	0.0190502	NA	NA	NA
on.gene.LG1.211	E015	NA	NA	NA	NA	NA	NA	NA	NA	NA	NA	NA	0.0286101	NA	NA	NA
on.gene.LG1.212	E007	NA	NA	NA	NA	NA	NA	NA	NA	NA	NA	NA	0.00377347	NA	NA	NA
on.gene.LG1.212	E008	NA	NA	NA	NA	NA	NA	NA	NA	NA	NA	NA	0.0157446	0.00945517	NA	NA
on.gene.LG1.212	E015	NA	NA	NA	NA	0.0457363	NA	NA	NA	0.0105218	NA	NA	NA	NA	NA	NA
on.gene.LG1.212	E016	NA	NA	NA	NA	NA	NA	NA	NA	NA	NA	NA	NA	0.00956824	NA	NA
on.gene.LG1.212	E017	NA	NA	NA	NA	NA	NA	NA	NA	NA	NA	0.00598757	NA	0.000639718	NA	NA
on.gene.LG1.213	E007	NA	NA	NA	NA	NA	NA	0.0297261	NA	0.0046947	NA	NA	NA	0.000118841	NA	0.0033168
on.gene.LG1.213	E011	NA	NA	NA	NA	NA	NA	NA	NA	NA	NA	NA	NA	0.00441606	NA	NA
on.gene.LG1.213	E012	NA	NA	NA	NA	NA	NA	0.00208531	NA	NA	NA	NA	NA	NA	NA	0.00795665
on.gene.LG1.215	E001	NA	NA	NA	NA	NA	NA	NA	NA	NA	0.0269714	NA	NA	NA	NA	NA
on.gene.LG1.217	E001	NA	0.00530993	NA	NA	0.0221966	NA	NA	NA	NA	NA	0.000569418	NA	NA	NA	0.031645
on.gene.LG1.217	E005	NA	NA	NA	0.023741	NA	NA	NA	NA	NA	NA	NA	NA	NA	NA	NA
on.gene.LG1.217	E006	NA	NA	NA	0.032509	NA	NA	NA	NA	NA	NA	NA	NA	NA	NA	NA
on.gene.LG1.219	E004	NA	NA	0.0133902	0.0122352	0.00798485	NA	NA	NA	NA	NA	0.0438028	0.0246817	NA	NA	NA
on.gene.LG1.219	E005	NA	NA	NA	0.00255435	0.00737594	NA	NA	NA	NA	NA	0.0196587	0.0486307	NA	NA	NA
on.gene.LG1.220	E001	NA	0.000818959	0.00107696	NA	NA	NA	NA	NA	NA	0.0168894	NA	NA	NA	NA	0.0111417
on.gene.LG1.220	E002	NA	NA	0.0029226	NA	0.0243379	NA	0.0345828	NA	NA	0.000272598	NA	0.00249916	0.00503231	NA	NA
on.gene.LG1.220	E003	NA	0.0320643	NA	NA	NA	NA	NA	NA	NA	NA	NA	0.00245076	NA	NA	NA
on.gene.LG1.220	E004	NA	NA	NA	NA	0.00856142	NA	0.0266982	NA	NA	NA	NA	NA	NA	NA	NA
on.gene.LG1.220	E005	NA	NA	NA	NA	0.0401333	NA	NA	NA	NA	0.0117776	0.000768063	0.000231942	NA	NA	NA
on.gene.LG1.220	E006	NA	NA	NA	NA	NA	NA	NA	NA	NA	NA	NA	0.00597161	NA	NA	NA
on.gene.LG1.220	E010	NA	NA	NA	NA	NA	NA	0.0473241	NA	NA	NA	NA	NA	0.000574019	0.0279286	0.00353172
on.gene.LG1.220	E011	NA	0.000726011	NA	NA	NA	NA	NA	NA	NA	NA	NA	NA	NA	NA	0.00179224
on.gene.LG1.221	E007	NA	NA	NA	NA	NA	NA	NA	NA	NA	0.0145969	0.00052054	NA	NA	NA	NA
on.gene.LG1.221	E008	NA	NA	NA	NA	NA	NA	NA	NA	NA	NA	0.0418049	NA	NA	NA	NA
on.gene.LG1.221	E009	NA	NA	NA	NA	NA	NA	NA	NA	NA	0.010704	0.0116134	NA	NA	NA	NA
on.gene.LG1.221	E010	NA	NA	NA	NA	NA	NA	NA	NA	NA	NA	NA	NA	0.0218278	NA	NA
on.gene.LG1.221	E011	NA	NA	NA	NA	NA	NA	NA	NA	NA	NA	NA	NA	NA	0.047861	0.0349545
on.gene.LG1.222	E002	NA	0.000176147	NA	NA	0.00374049	NA	NA	0.0026085	0.00732484	NA	NA	0.00203574	NA	NA	NA
on.gene.LG1.222	E003	NA	NA	NA	NA	NA	NA	NA	NA	NA	0.0148506	0.00100607	0.0134177	NA	NA	NA
on.gene.LG1.222	E005	NA	0.00647965	NA	NA	NA	NA	NA	NA	NA	NA	NA	NA	NA	NA	NA
on.gene.LG1.222	E006	NA	0.0243439	NA	NA	NA	NA	NA	0.044301	NA	NA	NA	NA	0.000957157	NA	NA
on.gene.LG1.223	E001	0.00111387	0.000221331	0.000151302	NA	0.000107751	0.0337449	0.00737234	NA	NA	NA	0.012255	NA	NA	NA	0.0113408
on.gene.LG1.223	E002	NA	NA	NA	NA	NA	0.0348358	NA	NA	NA	NA	NA	NA	NA	NA	NA
on.gene.LG1.223	E003	0.0148603	NA	NA	0.0238694	NA	NA	NA	NA	NA	NA	NA	NA	NA	NA	NA
on.gene.LG1.223	E004	NA	NA	NA	NA	NA	0.0208061	NA	NA	NA	NA	NA	NA	NA	NA	NA
on.gene.LG1.223	E005	NA	NA	0.0242388	NA	NA	NA	0.0204068	NA	NA	NA	0.00173842	NA	NA	NA	NA
on.gene.LG1.223	E006	NA	NA	NA	0.00994715	NA	NA	NA	0.00249724	NA	0.0281609	NA	NA	NA	NA	0.0425784
on.gene.LG1.224	E002	NA	NA	0.0183281	0.00922243	NA	NA	NA	NA	NA	0.000531716	0.000237806	NA	NA	NA	NA
on.gene.LG1.224	E005	0.014501	NA	NA	NA	NA	NA	NA	NA	NA	NA	NA	NA	NA	NA	0.00031492
on.gene.LG1.225	E006	NA	NA	0.00425688	0.000675511	0.0096079	NA	0.0111878	NA	NA	0.00214448	NA	0.00320839	0.0038224	NA	NA
on.gene.LG1.23	E001	NA	NA	0.0048819	NA	0.00369566	NA	0.000489068	NA	NA	NA	0.000436226	NA	0.0153891	NA	NA
on.gene.LG1.23	E003	NA	NA	NA	0.0357584	NA	NA	NA	NA	NA	NA	NA	NA	NA	NA	NA
on.gene.LG1.233	E017	NA	NA	NA	NA	NA	NA	0.00135629	NA	0.00808905	NA	0.0125595	NA	NA	NA	NA
on.gene.LG1.234	E001	NA	0.0108061	NA	NA	0.000546994	NA	NA	NA	NA	NA	NA	0.00013156	0.0370653	NA	NA
on.gene.LG1.234	E002	NA	0.0148433	NA	NA	0.00274102	NA	NA	NA	NA	NA	NA	NA	0.0296452	NA	NA
on.gene.LG1.234	E008	NA	NA	NA	NA	0.00920388	NA	NA	NA	NA	0.0477234	NA	0.00292331	NA	NA	NA
on.gene.LG1.234	E016	NA	NA	NA	0.0378676	NA	NA	NA	NA	NA	NA	NA	NA	NA	NA	NA
on.gene.LG1.234	E023	0.0322438	NA	NA	NA	NA	NA	NA	NA	NA	NA	NA	NA	NA	NA	NA
on.gene.LG1.234	E027	NA	NA	NA	NA	NA	NA	NA	NA	NA	NA	NA	0.00233499	0.00268707	NA	NA
on.gene.LG1.234	E028	NA	NA	NA	NA	0.0179008	NA	NA	NA	NA	NA	NA	0.000742359	0.0160639	NA	NA
on.gene.LG1.234	E029	NA	NA	NA	NA	0.000418942	NA	0.00374172	NA	NA	NA	NA	NA	NA	NA	NA
on.gene.LG1.234	E031	NA	NA	NA	0.000221945	0.00176635	NA	0.0484574	NA	NA	NA	0.0031416	0.0169069	NA	NA	NA
on.gene.LG1.234	E032	NA	NA	NA	NA	NA	NA	NA	NA	NA	NA	0.0452718	NA	NA	NA	NA
on.gene.LG1.236	E003	NA	NA	NA	NA	0.0089767	NA	0.0338235	NA	NA	0.0172214	0.0161067	0.000719739	0.00370831	NA	NA
on.gene.LG1.236	E004	NA	NA	NA	0.0352228	NA	NA	NA	NA	NA	NA	NA	NA	NA	NA	NA
on.gene.LG1.236	E010	NA	NA	NA	NA	NA	NA	0.0461572	NA	NA	NA	0.00539047	0.0337843	0.00140118	NA	NA
on.gene.LG1.236	E011	NA	NA	NA	NA	NA	NA	NA	NA	NA	0.0162759	0.0481542	0.00229615	0.000617084	NA	NA
on.gene.LG1.236	E012	NA	NA	NA	NA	0.0234017	NA	NA	NA	NA	NA	NA	0.0030051	NA	NA	NA
on.gene.LG1.240	E005	NA	NA	NA	NA	NA	NA	NA	NA	NA	NA	NA	NA	0.0146766	NA	NA
on.gene.LG1.244	E003	NA	NA	NA	NA	NA	NA	0.0458866	NA	NA	NA	NA	NA	NA	NA	NA
on.gene.LG1.244	E004	NA	NA	NA	NA	0.0446451	NA	NA	0.0391895	NA	NA	NA	NA	NA	NA	NA
on.gene.LG1.244	E005	NA	NA	NA	NA	0.00872951	NA	NA	NA	NA	NA	NA	0.00963142	NA	NA	NA
on.gene.LG1.244	E006	NA	NA	NA	NA	NA	NA	NA	NA	NA	NA	NA	0.0297276	0.0171308	NA	NA
on.gene.LG1.244	E007	NA	NA	NA	NA	NA	NA	NA	NA	NA	NA	NA	NA	0.0402024	NA	NA
on.gene.LG1.244	E008	NA	NA	NA	NA	NA	NA	NA	NA	NA	NA	NA	NA	0.0379442	NA	NA
on.gene.LG1.245	E011	NA	0.0236516	NA	NA	NA	NA	NA	NA	NA	NA	NA	NA	NA	NA	NA
on.gene.LG1.245	E026	NA	NA	NA	NA	NA	NA	NA	NA	NA	NA	NA	0.0267331	NA	NA	NA
on.gene.LG1.246	E003	NA	0.039855	NA	NA	NA	NA	NA	NA	NA	NA	NA	NA	NA	NA	NA
on.gene.LG1.246	E010	NA	NA	NA	0.0430703	NA	NA	NA	NA	NA	NA	0.0111827	NA	NA	NA	0.0329949
on.gene.LG1.246	E012	NA	NA	NA	NA	NA	NA	NA	NA	NA	NA	NA	0.0178952	NA	NA	NA
on.gene.LG1.248	E001	NA	NA	NA	NA	NA	NA	NA	NA	NA	NA	NA	0.000633039	NA	NA	NA
on.gene.LG1.248	E002	NA	NA	NA	0.000129825	0.000430605	NA	0.00393818	NA	NA	NA	NA	NA	0.000475311	NA	NA
on.gene.LG1.248	E004	NA	NA	NA	NA	NA	NA	NA	NA	NA	NA	0.0271719	NA	NA	NA	NA
on.gene.LG1.248	E005	NA	NA	NA	NA	NA	NA	NA	NA	NA	NA	NA	NA	0.0446787	NA	NA
on.gene.LG1.248	E006	NA	0.00797933	NA	NA	NA	NA	NA	0.00762245	NA	0.0312174	0.000151033	NA	0.00115771	NA	NA
on.gene.LG1.25	E001	NA	NA	NA	NA	NA	NA	NA	NA	NA	NA	NA	NA	0.0361332	NA	NA
on.gene.LG1.25	E002	NA	NA	NA	NA	NA	NA	NA	NA	NA	NA	NA	NA	0.0123094	NA	NA
on.gene.LG1.25	E003	NA	NA	NA	NA	NA	NA	NA	NA	NA	NA	NA	NA	0.028498	NA	NA
on.gene.LG1.25	E004	NA	NA	NA	NA	NA	NA	NA	NA	NA	NA	NA	NA	0.00549243	NA	0.0415292
on.gene.LG1.25	E005	NA	NA	NA	NA	NA	NA	NA	NA	NA	NA	NA	NA	0.0126875	NA	NA
on.gene.LG1.25	E007	NA	NA	NA	0.0227566	0.0195092	NA	NA	NA	NA	NA	NA	NA	NA	NA	NA
on.gene.LG1.25	E016	NA	0.0110542	NA	NA	0.0130644	NA	NA	NA	NA	NA	NA	0.00285877	NA	NA	NA
on.gene.LG1.25	E017	NA	NA	NA	NA	0.000529909	NA	NA	NA	NA	NA	NA	0.00201971	NA	NA	NA
on.gene.LG1.25	E018	NA	NA	NA	0.0305384	0.00429748	NA	NA	NA	NA	NA	NA	NA	NA	NA	NA
on.gene.LG1.25	E019	NA	NA	NA	NA	0.00491895	NA	NA	NA	NA	NA	NA	0.00552	NA	NA	NA
on.gene.LG1.25	E028	NA	NA	NA	NA	NA	NA	NA	NA	NA	NA	NA	NA	NA	0.0140546	NA
on.gene.LG1.25	E029	NA	NA	NA	NA	NA	NA	0.0302886	NA	NA	NA	NA	NA	NA	NA	NA
on.gene.LG1.25	E030	NA	NA	NA	NA	NA	NA	0.0215978	NA	NA	NA	NA	NA	NA	NA	NA
on.gene.LG1.25	E032	NA	NA	NA	NA	NA	NA	NA	NA	NA	NA	NA	0.0200834	NA	NA	NA
on.gene.LG1.25	E034	NA	NA	NA	NA	0.0172742	NA	NA	NA	NA	0.000166021	0.00056209	NA	0.000904988	NA	NA
on.gene.LG1.25	E036	NA	NA	NA	0.00936366	NA	NA	NA	NA	NA	NA	0.000637557	0.0466115	0.00674838	NA	NA
on.gene.LG1.25	E038	NA	NA	NA	NA	NA	NA	NA	NA	NA	NA	NA	NA	0.0319381	NA	NA
on.gene.LG1.25	E039	NA	NA	NA	NA	NA	NA	NA	NA	0.000372128	NA	0.0175187	NA	0.0219123	0.00493019	NA
on.gene.LG1.25	E040	NA	NA	0.0240796	NA	0.00318654	NA	NA	NA	NA	0.000510564	NA	NA	NA	NA	NA
on.gene.LG1.25	E041	NA	NA	NA	NA	NA	NA	NA	NA	0.0496404	NA	NA	NA	0.0179614	0.0429096	NA
on.gene.LG1.250	E002	NA	NA	NA	NA	NA	NA	NA	NA	NA	NA	0.0233176	NA	NA	NA	NA
on.gene.LG1.250	E005	NA	NA	NA	0.0293512	NA	NA	NA	NA	NA	NA	0.000342859	0.00302913	NA	NA	NA
on.gene.LG1.250	E009	NA	NA	NA	NA	0.0390279	NA	NA	NA	NA	NA	NA	NA	NA	NA	NA
on.gene.LG1.250	E012	NA	0.0329753	NA	NA	NA	NA	NA	NA	NA	NA	NA	0.0232315	NA	NA	NA
on.gene.LG1.250	E013	NA	NA	NA	NA	NA	NA	NA	0.0128056	NA	NA	NA	NA	NA	NA	NA
on.gene.LG1.251	E001	NA	NA	0.0483759	NA	NA	NA	NA	NA	NA	0.0227713	NA	NA	NA	NA	NA
on.gene.LG1.252	E010	NA	NA	NA	NA	NA	NA	NA	NA	NA	NA	NA	NA	0.0139036	NA	NA
on.gene.LG1.256	E002	NA	NA	NA	NA	NA	NA	NA	NA	NA	NA	NA	NA	0.000465464	NA	NA
on.gene.LG1.256	E005	NA	NA	NA	NA	NA	NA	0.0187241	NA	NA	NA	NA	NA	NA	NA	NA
on.gene.LG1.257	E005	NA	NA	NA	NA	NA	NA	NA	NA	NA	NA	0.0149912	NA	NA	NA	NA
on.gene.LG1.257	E018	NA	NA	NA	NA	NA	NA	NA	NA	NA	NA	NA	0.0204742	NA	NA	NA
on.gene.LG1.257	E019	NA	NA	NA	NA	NA	NA	NA	NA	NA	NA	0.0191986	NA	NA	NA	NA
on.gene.LG1.257	E021	0.0225652	0.0210018	NA	NA	NA	NA	NA	NA	NA	NA	NA	NA	NA	NA	NA
on.gene.LG1.258	E001	NA	NA	NA	NA	NA	NA	NA	NA	NA	NA	NA	NA	0.0214041	NA	NA
on.gene.LG1.258	E004	NA	NA	NA	NA	NA	NA	NA	NA	NA	NA	0.0321673	NA	NA	NA	NA
on.gene.LG1.258	E005	NA	NA	NA	0.0455685	0.0295186	NA	NA	NA	NA	NA	NA	NA	NA	NA	NA
on.gene.LG1.258	E006	NA	NA	NA	NA	0.0202067	NA	NA	NA	NA	NA	NA	0.00429956	NA	NA	NA
on.gene.LG1.258	E009	NA	NA	NA	NA	0.0420105	NA	NA	NA	NA	NA	NA	NA	NA	NA	NA
on.gene.LG1.258	E012	NA	NA	NA	NA	0.0092456	NA	NA	NA	NA	0.0483932	0.00391698	NA	NA	NA	NA
on.gene.LG1.258	E013	NA	NA	NA	0.0464478	0.039304	NA	NA	NA	NA	NA	0.0120886	0.0106816	0.0259991	NA	NA
on.gene.LG1.260	E005	NA	NA	NA	NA	NA	NA	NA	NA	NA	NA	NA	NA	0.0445594	NA	NA
on.gene.LG1.260	E013	NA	NA	NA	NA	NA	NA	0.0265846	NA	NA	NA	NA	NA	NA	NA	NA
on.gene.LG1.260	E014	NA	NA	NA	0.0290771	NA	NA	NA	NA	NA	NA	NA	NA	NA	NA	NA
on.gene.LG1.260	E016	NA	NA	NA	NA	NA	NA	NA	NA	NA	NA	NA	NA	0.0400691	NA	NA
on.gene.LG1.260	E017	NA	NA	NA	NA	NA	NA	NA	NA	NA	NA	NA	0.0194969	NA	NA	NA
on.gene.LG1.261	E013	NA	NA	NA	0.00843127	NA	NA	NA	NA	NA	NA	NA	0.00422754	0.000673025	NA	NA
on.gene.LG1.261	E014	NA	NA	NA	0.00211345	NA	NA	NA	NA	NA	NA	NA	0.00212781	0.00217286	NA	NA
on.gene.LG1.263	E006	NA	NA	NA	NA	0.0490464	NA	NA	NA	NA	NA	NA	NA	NA	NA	NA
on.gene.LG1.263	E007	NA	NA	NA	NA	0.0196493	NA	NA	NA	NA	NA	NA	0.0156276	NA	NA	NA
on.gene.LG1.263	E017	NA	0.00683699	NA	NA	0.0281915	NA	NA	NA	NA	NA	NA	NA	NA	NA	NA
on.gene.LG1.266	E005	NA	NA	NA	NA	NA	NA	NA	NA	NA	NA	NA	NA	0.0354457	NA	NA
on.gene.LG1.266	E010	NA	NA	NA	NA	NA	NA	NA	NA	NA	NA	NA	0.00746513	NA	NA	NA
on.gene.LG1.266	E011	NA	NA	NA	NA	NA	NA	NA	NA	NA	NA	NA	0.00877906	NA	NA	NA
on.gene.LG1.266	E016	NA	NA	NA	NA	NA	NA	NA	NA	NA	NA	NA	NA	NA	NA	0.0477117
on.gene.LG1.267	E001	NA	NA	NA	0.0226707	NA	NA	NA	NA	NA	NA	NA	NA	NA	NA	NA
on.gene.LG1.267	E002	NA	0.00229542	NA	NA	NA	NA	NA	NA	NA	NA	NA	0.00662333	NA	NA	NA
on.gene.LG1.267	E003	NA	0.00116657	NA	NA	NA	NA	NA	NA	NA	NA	NA	0.00586022	NA	NA	NA
on.gene.LG1.267	E004	NA	NA	NA	NA	NA	NA	NA	NA	NA	NA	NA	0.0418153	NA	NA	NA
on.gene.LG1.267	E007	NA	NA	NA	NA	NA	NA	NA	NA	NA	NA	0.0289008	NA	NA	NA	NA
on.gene.LG1.267	E008	NA	0.0434586	NA	NA	NA	NA	NA	NA	NA	NA	NA	NA	NA	NA	NA
on.gene.LG1.267	E009	NA	NA	NA	NA	NA	NA	NA	NA	NA	NA	NA	0.00405256	0.0307352	NA	NA
on.gene.LG1.267	E014	NA	NA	NA	0.0229076	NA	NA	NA	NA	NA	NA	NA	NA	NA	NA	NA
on.gene.LG1.267	E015	NA	NA	NA	0.00985327	NA	NA	NA	NA	NA	NA	0.00438712	NA	NA	NA	0.0138668
on.gene.LG1.267	E020	NA	NA	NA	NA	NA	NA	NA	NA	NA	NA	NA	0.00585625	NA	NA	NA
on.gene.LG1.267	E021	NA	NA	NA	NA	NA	NA	NA	NA	NA	NA	NA	0.0186633	NA	NA	NA
on.gene.LG1.267	E022	NA	NA	NA	NA	NA	NA	NA	NA	NA	NA	NA	0.00816263	NA	NA	NA
on.gene.LG1.267	E023	NA	NA	NA	NA	NA	NA	NA	NA	NA	NA	NA	0.0216325	NA	NA	NA
on.gene.LG1.268	E001	NA	NA	NA	0.0310719	NA	NA	NA	NA	0.0471234	NA	0.0458995	NA	NA	NA	NA
on.gene.LG1.268	E007	NA	NA	NA	0.0498262	NA	NA	NA	NA	NA	NA	NA	NA	NA	NA	NA
on.gene.LG1.27	E001	NA	NA	NA	0.00103991	0.000136881	NA	NA	NA	NA	NA	0.000343041	NA	NA	NA	NA
on.gene.LG1.27	E002	NA	NA	NA	0.00398703	0.00263859	NA	0.000377948	NA	NA	NA	0.000929723	0.00042853	NA	NA	NA
on.gene.LG1.27	E004	NA	NA	NA	NA	NA	NA	0.0135347	NA	NA	NA	NA	NA	0.000556471	NA	NA
on.gene.LG1.27	E006	NA	0.0194069	NA	NA	NA	NA	NA	NA	NA	NA	NA	NA	0.0124108	NA	NA
on.gene.LG1.27	E007	NA	0.0462891	NA	NA	NA	NA	NA	NA	NA	NA	NA	0.0059325	NA	NA	NA
on.gene.LG1.27	E013	NA	NA	NA	NA	NA	NA	NA	NA	NA	NA	NA	0.0463803	NA	NA	NA
on.gene.LG1.27	E016	NA	NA	NA	NA	NA	NA	NA	NA	NA	NA	NA	0.00286824	NA	NA	NA
on.gene.LG1.27	E017	NA	NA	NA	NA	NA	NA	NA	NA	NA	NA	NA	0.00460725	NA	NA	NA
on.gene.LG1.27	E019	NA	NA	NA	NA	NA	NA	NA	NA	NA	NA	0.0178994	NA	0.0287386	NA	NA
on.gene.LG1.27	E022	NA	NA	NA	NA	NA	NA	NA	NA	NA	NA	NA	NA	0.0215576	NA	0.0348054
on.gene.LG1.27	E023	NA	NA	NA	NA	0.0435126	NA	NA	NA	NA	NA	NA	NA	NA	NA	0.0349315
on.gene.LG1.27	E024	NA	NA	NA	NA	0.00892883	NA	0.000535971	NA	NA	NA	NA	0.000452067	NA	NA	NA
on.gene.LG1.27	E025	NA	NA	NA	NA	NA	NA	NA	NA	NA	NA	NA	0.00407024	0.0182403	NA	NA
on.gene.LG1.27	E028	NA	NA	NA	NA	NA	NA	NA	NA	NA	NA	NA	NA	0.0348144	NA	NA
on.gene.LG1.271	E001	NA	NA	NA	0.0301103	NA	NA	NA	NA	NA	NA	NA	NA	NA	NA	NA
on.gene.LG1.273	E001	NA	0.039941	NA	NA	NA	NA	NA	NA	NA	NA	NA	NA	NA	NA	0.0484569
on.gene.LG1.273	E002	NA	0.0216636	NA	0.00927024	NA	NA	NA	NA	NA	NA	0.0279704	NA	NA	NA	0.00276004
on.gene.LG1.273	E003	NA	0.042645	NA	NA	NA	NA	NA	NA	NA	NA	NA	NA	NA	NA	0.0487028
on.gene.LG1.273	E010	NA	NA	NA	NA	NA	NA	NA	NA	NA	NA	0.0462392	NA	NA	NA	NA
on.gene.LG1.273	E011	NA	NA	NA	NA	NA	NA	NA	NA	NA	0.022067	0.0048519	0.021564	NA	NA	NA
on.gene.LG1.273	E012	NA	NA	NA	NA	NA	NA	NA	NA	NA	NA	0.000527606	NA	NA	NA	NA
on.gene.LG1.273	E013	NA	NA	NA	NA	NA	NA	NA	NA	NA	NA	0.0035641	NA	NA	NA	NA
on.gene.LG1.273	E014	NA	NA	NA	NA	NA	NA	NA	NA	NA	NA	0.0210281	NA	NA	NA	NA
on.gene.LG1.273	E032	NA	NA	NA	NA	NA	NA	NA	NA	NA	NA	0.0158661	NA	NA	NA	NA
on.gene.LG1.273	E034	NA	0.0443564	NA	NA	NA	NA	NA	NA	NA	NA	NA	NA	0.020357	NA	0.00531275
on.gene.LG1.273	E035	NA	0.00389913	NA	NA	NA	NA	NA	NA	NA	NA	0.0125635	NA	NA	NA	NA
on.gene.LG1.275	E017	NA	NA	NA	NA	0.0137462	NA	NA	NA	NA	NA	NA	0.00682196	NA	NA	NA
on.gene.LG1.277	E007	NA	NA	NA	NA	NA	NA	NA	NA	NA	NA	0.0358655	NA	NA	NA	NA
on.gene.LG1.279	E001	NA	NA	0.00855139	NA	NA	NA	NA	0.00700623	NA	0.0127912	NA	NA	NA	NA	0.00188885
on.gene.LG1.279	E002	NA	0.00121476	NA	0.0144317	NA	NA	NA	NA	NA	NA	0.0257248	NA	NA	NA	NA
on.gene.LG1.279	E003	NA	0.0396162	NA	NA	NA	NA	NA	NA	NA	NA	NA	0.0493828	NA	NA	NA
on.gene.LG1.279	E004	NA	0.0153256	NA	NA	NA	NA	NA	NA	NA	NA	NA	0.000442996	0.0100155	NA	NA
on.gene.LG1.279	E005	NA	NA	NA	NA	NA	NA	NA	NA	NA	NA	NA	0.0493741	NA	NA	NA
on.gene.LG1.279	E006	NA	NA	NA	NA	NA	NA	NA	NA	NA	NA	NA	0.00609823	0.0377999	NA	NA
on.gene.LG1.279	E007	NA	NA	NA	NA	NA	NA	NA	NA	NA	NA	0.0118565	0.00270001	0.0141538	NA	NA
on.gene.LG1.279	E008	NA	NA	NA	NA	NA	NA	NA	NA	NA	NA	0.0202078	0.00133574	0.0150138	NA	NA
on.gene.LG1.279	E009	NA	NA	NA	NA	NA	NA	NA	NA	NA	NA	0.0256742	0.0471746	NA	NA	NA
on.gene.LG1.279	E014	NA	NA	NA	NA	NA	NA	NA	NA	NA	NA	0.0116842	0.0428097	NA	NA	NA
on.gene.LG1.279	E015	NA	NA	NA	NA	NA	NA	NA	NA	NA	NA	0.000320231	0.000720499	0.0282512	NA	NA
on.gene.LG1.279	E016	NA	NA	NA	NA	NA	NA	NA	NA	NA	0.036724	0.00126081	0.000429398	0.036045	NA	NA
on.gene.LG1.279	E020	NA	0.00362573	NA	NA	NA	NA	NA	NA	NA	NA	0.00710864	NA	NA	NA	NA
on.gene.LG1.279	E024	0.0256719	NA	NA	NA	0.0106751	NA	NA	0.000177559	NA	NA	NA	NA	NA	NA	NA
on.gene.LG1.279	E025	NA	NA	NA	NA	0.00969157	NA	NA	0.0249015	NA	NA	0.000128739	NA	NA	NA	NA
on.gene.LG1.279	E027	NA	NA	NA	NA	0.00225636	NA	NA	NA	NA	0.00137047	0.000898139	NA	0.000634546	NA	NA
on.gene.LG1.280	E001	NA	NA	NA	NA	NA	NA	NA	NA	NA	NA	NA	NA	0.0345567	NA	NA
on.gene.LG1.280	E003	NA	NA	NA	NA	NA	NA	NA	NA	NA	NA	0.022048	NA	0.0444046	NA	NA
on.gene.LG1.280	E004	NA	NA	NA	NA	NA	NA	NA	NA	NA	NA	0.0276561	NA	0.0150749	NA	NA
on.gene.LG1.280	E009	NA	NA	NA	NA	NA	NA	NA	NA	NA	NA	NA	NA	0.00802469	NA	NA
on.gene.LG1.280	E013	NA	NA	NA	NA	NA	NA	NA	NA	NA	NA	NA	0.0202899	NA	NA	NA
on.gene.LG1.281	E001	NA	0.00368018	NA	NA	NA	NA	NA	NA	NA	NA	NA	0.0162008	0.0358398	NA	0.0115647
on.gene.LG1.281	E002	NA	0.00947697	NA	NA	NA	NA	NA	NA	NA	NA	NA	NA	0.00819518	NA	0.000826479
on.gene.LG1.281	E004	NA	NA	NA	NA	NA	NA	NA	NA	NA	NA	NA	NA	NA	NA	0.014917
on.gene.LG1.281	E005	NA	NA	NA	NA	NA	NA	0.00574599	NA	NA	NA	NA	NA	0.00125911	NA	NA
on.gene.LG1.281	E006	NA	NA	NA	NA	NA	NA	0.0241277	NA	0.0312	NA	0.0389261	NA	0.000197118	NA	NA
on.gene.LG1.281	E007	NA	NA	NA	NA	NA	NA	NA	NA	NA	NA	NA	NA	0.0184117	NA	NA
on.gene.LG1.281	E008	NA	NA	NA	NA	NA	NA	NA	NA	NA	NA	NA	0.0454552	NA	NA	NA
on.gene.LG1.281	E013	NA	NA	NA	NA	NA	NA	NA	NA	NA	NA	NA	0.0477936	NA	NA	NA
on.gene.LG1.281	E037	NA	NA	NA	NA	NA	NA	NA	NA	NA	NA	NA	NA	0.0218503	NA	NA
on.gene.LG1.281	E040	NA	NA	NA	NA	NA	NA	NA	NA	NA	NA	NA	NA	NA	NA	0.00442333
on.gene.LG1.281	E041	NA	NA	NA	NA	NA	NA	NA	NA	NA	NA	NA	NA	NA	NA	0.0323466
on.gene.LG1.281	E042	NA	NA	NA	NA	NA	NA	NA	NA	NA	NA	NA	NA	NA	NA	0.0164025
on.gene.LG1.281	E043	NA	NA	NA	NA	NA	NA	NA	NA	NA	NA	NA	NA	NA	NA	0.0115532
on.gene.LG1.283	E005	NA	NA	NA	NA	0.0197208	NA	NA	NA	NA	NA	NA	NA	NA	NA	NA
on.gene.LG1.2830001	E005	NA	NA	NA	NA	0.048696	NA	NA	NA	NA	NA	NA	0.0191925	NA	NA	NA
on.gene.LG1.2830001	E008	NA	NA	NA	0.00497474	NA	NA	NA	NA	NA	NA	0.000109737	NA	NA	NA	NA
on.gene.LG1.284	E001	NA	NA	NA	NA	0.0366401	NA	NA	NA	NA	NA	NA	0.00815668	NA	NA	NA
on.gene.LG1.284	E017	NA	NA	NA	NA	NA	NA	NA	NA	NA	NA	NA	0.00882527	NA	NA	NA
on.gene.LG1.285	E003	NA	NA	NA	NA	NA	NA	NA	NA	NA	NA	0.0435522	NA	NA	NA	NA
on.gene.LG1.285	E006	NA	NA	NA	NA	NA	NA	NA	NA	NA	NA	NA	NA	0.0304343	NA	0.0414897
on.gene.LG1.285	E014	NA	NA	NA	0.0160572	NA	NA	NA	NA	NA	NA	NA	NA	NA	NA	NA
on.gene.LG1.285	E019	NA	NA	NA	NA	NA	NA	NA	NA	NA	NA	0.00841472	0.00412364	0.0477714	NA	NA
on.gene.LG1.285	E021	NA	NA	0.0134312	0.00312611	NA	NA	NA	NA	NA	0.000148481	NA	NA	0.00152897	NA	NA
on.gene.LG1.285	E022	NA	NA	0.0217657	0.00580198	0.00117351	NA	NA	NA	NA	0.0314136	0.00537709	0.000772188	NA	NA	NA
on.gene.LG1.285	E025	NA	NA	0.0204297	0.035425	0.00120089	NA	NA	NA	NA	NA	NA	0.00577673	NA	NA	NA
on.gene.LG1.286	E014	NA	NA	NA	NA	NA	NA	NA	NA	NA	0.0439878	NA	NA	NA	NA	NA
on.gene.LG1.286	E016	0.0444369	NA	NA	NA	0.0286329	NA	NA	NA	NA	0.013348	NA	0.0297454	NA	NA	NA
on.gene.LG1.288	E003	NA	NA	NA	NA	0.00346789	NA	NA	0.0247292	0.00277521	NA	NA	NA	NA	NA	NA
on.gene.LG1.288	E004	NA	0.00825159	NA	NA	NA	NA	NA	NA	NA	NA	NA	0.00546288	NA	NA	NA
on.gene.LG1.288	E006	NA	NA	NA	NA	NA	NA	NA	NA	NA	NA	0.0329941	NA	NA	NA	NA
on.gene.LG1.288	E007	NA	0.0357753	NA	NA	NA	NA	NA	NA	NA	NA	NA	NA	NA	NA	NA
on.gene.LG1.288	E008	NA	NA	NA	NA	0.0200302	NA	NA	NA	NA	NA	NA	0.000614849	NA	NA	NA
on.gene.LG1.288	E009	NA	0.023723	NA	NA	NA	NA	NA	NA	NA	0.00354755	NA	NA	NA	NA	NA
on.gene.LG1.29	E002	NA	0.023195	NA	NA	NA	NA	NA	NA	NA	NA	NA	NA	NA	NA	NA
on.gene.LG1.29	E003	NA	0.0333041	NA	0.00320515	NA	NA	NA	NA	NA	NA	0.00147184	NA	NA	NA	NA
on.gene.LG1.29	E004	NA	NA	0.00756721	0.00028177	0.00290073	NA	0.00492055	NA	NA	0.0156354	0.000334748	0.00325059	0.00506227	NA	NA
on.gene.LG1.29	E006	NA	NA	NA	0.0015438	NA	NA	NA	NA	NA	NA	0.0028662	NA	NA	NA	NA
on.gene.LG1.29	E008	NA	NA	0.00204681	0.000156263	NA	NA	NA	NA	NA	0.0089823	0.000582503	NA	NA	NA	NA
on.gene.LG1.29	E009	NA	0.0131204	NA	0.000720702	NA	NA	NA	NA	NA	0.0422346	0.000101299	NA	NA	NA	NA
on.gene.LG1.290	E001	NA	NA	NA	NA	0.0096345	NA	0.00593616	NA	NA	NA	NA	NA	NA	NA	NA
on.gene.LG1.290	E003	NA	NA	NA	NA	NA	NA	NA	NA	NA	NA	NA	NA	0.0491277	NA	NA
on.gene.LG1.290	E004	NA	NA	NA	NA	0.0208649	NA	NA	NA	NA	NA	NA	0.00435033	NA	NA	NA
on.gene.LG1.290	E005	NA	NA	NA	NA	0.0181976	NA	NA	NA	NA	NA	NA	0.013736	NA	NA	NA
on.gene.LG1.290	E018	NA	NA	NA	NA	NA	NA	NA	0.0117798	NA	NA	NA	0.0344933	NA	NA	NA
on.gene.LG1.290	E021	NA	NA	NA	NA	NA	NA	NA	NA	NA	NA	NA	0.0116882	NA	NA	NA
on.gene.LG1.294	E001	NA	NA	NA	NA	0.0372485	NA	0.0255039	0.0436875	NA	NA	0.00384477	0.000282922	0.000109913	0.0415265	NA
on.gene.LG1.294	E002	NA	NA	NA	NA	NA	NA	0.026549	NA	NA	NA	NA	0.0187333	0.00149123	NA	NA
on.gene.LG1.294	E004	NA	0.0183741	NA	0.0485688	NA	NA	NA	NA	NA	NA	NA	0.0483664	0.0190976	NA	0.00949923
on.gene.LG1.294	E005	NA	0.000324191	NA	0.000851268	NA	NA	NA	NA	NA	NA	0.033081	NA	0.000200012	0.00573026	NA
on.gene.LG1.294	E006	NA	NA	NA	NA	NA	NA	NA	NA	NA	NA	NA	NA	NA	NA	0.0232604
on.gene.LG1.294	E015	NA	NA	NA	NA	NA	NA	NA	NA	NA	NA	NA	NA	NA	0.0202675	NA
on.gene.LG1.294	E016	NA	NA	0.0461801	0.0150976	NA	NA	NA	NA	NA	NA	0.0285315	NA	NA	NA	NA
on.gene.LG1.294	E018	NA	0.0298855	NA	NA	0.0147207	NA	NA	NA	NA	NA	NA	0.00903723	NA	NA	NA
on.gene.LG1.294	E020	NA	0.0245876	NA	0.0265399	NA	NA	NA	NA	NA	NA	0.0381184	NA	NA	NA	0.00191059
on.gene.LG1.294	E021	NA	NA	NA	NA	NA	NA	NA	NA	NA	NA	NA	NA	NA	NA	0.0211575
on.gene.LG1.294	E023	NA	0.00807179	NA	NA	NA	NA	NA	NA	NA	NA	NA	NA	NA	NA	NA
on.gene.LG1.294	E024	NA	NA	NA	NA	NA	NA	NA	NA	NA	NA	NA	0.000760323	0.00486201	NA	NA
on.gene.LG1.294	E025	NA	NA	NA	NA	NA	NA	NA	NA	NA	NA	0.0352716	0.000154956	0.00479956	NA	NA
on.gene.LG1.294	E026	NA	NA	NA	NA	NA	NA	NA	NA	NA	NA	NA	0.000280067	NA	NA	NA
on.gene.LG1.294	E031	NA	NA	NA	NA	NA	NA	NA	NA	NA	NA	NA	NA	0.0207178	NA	NA
on.gene.LG1.294	E033	NA	NA	NA	NA	NA	NA	NA	NA	NA	NA	NA	NA	0.046476	NA	NA
on.gene.LG1.295	E001	NA	0.0321274	NA	NA	NA	NA	NA	NA	NA	NA	NA	NA	NA	NA	NA
on.gene.LG1.297	E004	NA	NA	NA	0.0230297	NA	NA	NA	NA	NA	NA	0.000189323	0.0281416	NA	NA	NA
on.gene.LG1.302	E001	0.0230416	0.0132468	NA	NA	NA	NA	NA	NA	NA	NA	NA	NA	NA	NA	0.013973
on.gene.LG1.302	E002	NA	NA	NA	0.00190539	NA	NA	NA	NA	NA	0.00318091	NA	0.000780576	NA	NA	0.00430567
on.gene.LG1.302	E003	0.0226209	0.0184621	NA	NA	NA	NA	NA	NA	NA	0.00081534	NA	NA	0.00182518	NA	0.00402662
on.gene.LG1.302	E004	0.0239629	NA	NA	NA	NA	NA	NA	NA	NA	NA	NA	NA	NA	NA	0.00308276
on.gene.LG1.302	E005	NA	0.00754167	NA	0.0420797	NA	NA	NA	NA	NA	NA	NA	NA	NA	NA	NA
on.gene.LG1.302	E007	NA	NA	NA	NA	NA	NA	NA	NA	NA	NA	0.00598456	0.0128242	NA	NA	NA
on.gene.LG1.302	E009	NA	NA	NA	0.00115424	NA	NA	NA	NA	NA	NA	NA	NA	NA	NA	NA
on.gene.LG1.302	E010	0.000594547	0.00478698	NA	NA	0.000234315	NA	0.00200842	NA	NA	0.000270275	NA	NA	NA	NA	0.00186324
on.gene.LG1.302	E011	NA	NA	NA	0.000329795	NA	NA	NA	NA	NA	NA	NA	0.0480935	NA	NA	NA
on.gene.LG1.302	E012	NA	NA	NA	0.00126052	NA	NA	NA	NA	NA	NA	0.0037435	NA	NA	NA	NA
on.gene.LG1.302	E013	NA	0.0326343	0.0292916	0.000169744	NA	NA	NA	NA	NA	NA	0.00628102	NA	NA	NA	NA
on.gene.LG1.302	E014	NA	0.00540042	0.0210644	NA	NA	NA	NA	NA	NA	NA	0.00642463	NA	NA	NA	0.0290677
on.gene.LG1.302	E015	NA	0.00385583	0.00489125	NA	NA	NA	NA	NA	NA	NA	0.000213279	NA	NA	NA	0.0167014
on.gene.LG1.304	E001	NA	NA	0.0228345	NA	NA	0.0022565	NA	NA	NA	NA	NA	0.00382156	NA	NA	NA
on.gene.LG1.304	E002	NA	NA	NA	NA	NA	NA	NA	NA	NA	NA	0.0395897	0.00440076	NA	NA	NA
on.gene.LG1.304	E005	NA	0.0323718	NA	NA	NA	NA	NA	NA	NA	NA	NA	0.045556	NA	NA	NA
on.gene.LG1.304	E006	NA	NA	NA	NA	0.000198976	NA	NA	0.0296116	NA	NA	NA	0.000440639	NA	NA	NA
on.gene.LG1.304	E007	NA	NA	0.00187521	0.000183522	NA	NA	0.00651264	0.000168402	0.000842347	NA	0.00830851	NA	NA	NA	NA
on.gene.LG1.304	E008	NA	0.000347264	0.00767007	0.00376848	NA	NA	0.0140091	0.000656691	0.00161725	NA	0.0364371	NA	NA	NA	NA
on.gene.LG1.307	E005	NA	NA	NA	NA	NA	NA	NA	NA	NA	NA	NA	0.0185032	NA	NA	NA
on.gene.LG1.308	E004	NA	NA	NA	NA	NA	NA	NA	NA	NA	NA	NA	0.0277985	NA	NA	NA
on.gene.LG1.308	E026	NA	NA	NA	NA	NA	NA	NA	NA	NA	NA	NA	0.000473811	NA	NA	NA
on.gene.LG1.310	E001	NA	NA	NA	NA	0.0365479	NA	0.00225164	NA	NA	NA	NA	0.00738045	0.000139746	NA	NA
on.gene.LG1.310	E003	NA	NA	NA	0.0199602	NA	NA	NA	NA	NA	NA	NA	NA	NA	NA	NA
on.gene.LG1.310	E013	NA	NA	NA	NA	NA	NA	0.00445621	NA	NA	NA	NA	NA	NA	0.0102177	0.0220833
on.gene.LG1.310	E014	NA	NA	NA	NA	NA	NA	NA	NA	NA	NA	NA	NA	0.0175686	NA	NA
on.gene.LG1.313	E014	NA	NA	NA	NA	NA	NA	NA	0.035024	NA	NA	NA	0.00719291	NA	NA	NA
on.gene.LG1.313	E017	NA	0.0125362	NA	0.00357745	NA	NA	NA	NA	NA	NA	NA	NA	NA	NA	NA
on.gene.LG1.313	E018	NA	0.0435751	NA	0.04767	NA	NA	NA	NA	NA	NA	NA	NA	NA	NA	NA
on.gene.LG1.313	E019	NA	NA	NA	NA	NA	NA	NA	0.0366717	NA	NA	NA	0.00394921	NA	NA	NA
on.gene.LG1.313	E020	NA	NA	NA	NA	NA	NA	NA	0.0332244	NA	NA	NA	0.00456649	NA	NA	NA
on.gene.LG1.313	E029	NA	NA	NA	0.0133368	NA	NA	NA	NA	NA	NA	0.00539736	NA	NA	NA	NA
on.gene.LG1.315	E002	NA	NA	NA	NA	NA	NA	NA	NA	NA	NA	NA	NA	NA	NA	0.0473101
on.gene.LG1.315	E012	NA	NA	NA	NA	0.0487248	NA	NA	0.00784986	NA	NA	NA	0.0272475	NA	NA	NA
on.gene.LG1.315	E013	NA	NA	NA	NA	NA	NA	NA	NA	NA	NA	NA	0.0346482	NA	NA	NA
on.gene.LG1.316	E011	NA	NA	NA	NA	NA	NA	NA	NA	NA	0.013141	0.000975281	0.0121922	NA	NA	NA
on.gene.LG1.318	E001	NA	0.0125222	NA	NA	NA	NA	NA	0.0163575	NA	NA	NA	0.0276007	NA	NA	NA
on.gene.LG1.319	E020	NA	NA	NA	NA	0.0210069	NA	NA	NA	NA	NA	NA	NA	NA	NA	NA
on.gene.LG1.319	E022	NA	NA	NA	NA	NA	NA	NA	NA	NA	NA	NA	0.0130943	NA	NA	NA
on.gene.LG1.319	E023	NA	NA	NA	NA	NA	NA	NA	NA	NA	NA	NA	0.0264387	NA	NA	NA
on.gene.LG1.319	E026	NA	0.0341766	NA	NA	0.0109732	NA	NA	NA	NA	NA	NA	NA	NA	NA	NA
on.gene.LG1.319	E030	NA	NA	NA	0.00813667	0.0369808	NA	NA	NA	NA	NA	NA	NA	NA	NA	NA
on.gene.LG1.32	E009	NA	0.0412635	NA	NA	NA	NA	NA	NA	NA	NA	NA	NA	NA	NA	NA
on.gene.LG1.321	E001	NA	0.00714728	NA	NA	NA	NA	NA	NA	NA	0.0198895	NA	0.00104077	0.0395213	NA	NA
on.gene.LG1.321	E003	NA	NA	NA	0.039975	NA	NA	NA	NA	NA	NA	NA	NA	NA	NA	NA
on.gene.LG1.321	E012	NA	NA	NA	0.00566278	NA	NA	NA	NA	NA	NA	0.00135749	NA	0.0386223	NA	NA
on.gene.LG1.321	E013	NA	NA	NA	0.0355478	NA	NA	NA	NA	NA	NA	0.00359098	NA	NA	NA	NA
on.gene.LG1.321	E014	NA	0.0439679	NA	NA	NA	NA	NA	NA	NA	NA	NA	NA	NA	NA	NA
on.gene.LG1.321	E017	NA	NA	NA	NA	NA	NA	NA	NA	NA	NA	0.0171248	NA	0.0363558	NA	NA
on.gene.LG1.321	E018	NA	NA	NA	NA	0.023054	NA	0.0395898	NA	NA	0.00928213	0.0121227	0.00203006	0.00346501	NA	NA
on.gene.LG1.322	E004	NA	NA	NA	NA	NA	NA	NA	NA	NA	NA	0.0475661	0.0113543	0.00045971	NA	NA
on.gene.LG1.322	E005	NA	NA	NA	NA	NA	NA	0.0357124	NA	NA	NA	0.0105489	0.00649634	NA	NA	NA
on.gene.LG1.322	E006	NA	NA	NA	NA	NA	NA	NA	NA	NA	NA	0.0068086	0.00745998	0.00152677	NA	NA
on.gene.LG1.322	E007	NA	NA	NA	0.000106339	NA	NA	NA	0.0259718	NA	0.0149328	NA	NA	NA	0.00243022	NA
on.gene.LG1.322	E008	NA	NA	NA	NA	NA	NA	NA	NA	NA	NA	NA	NA	0.0400588	NA	NA
on.gene.LG1.322	E010	NA	NA	NA	NA	NA	NA	NA	NA	NA	NA	0.00379958	NA	0.00132173	NA	NA
on.gene.LG1.322	E014	NA	NA	NA	NA	NA	NA	NA	NA	NA	NA	0.0464786	NA	NA	NA	NA
on.gene.LG1.322	E017	NA	NA	0.0327672	0.000132128	0.00213125	NA	NA	NA	NA	0.000877889	NA	NA	0.0162076	NA	NA
on.gene.LG1.322	E018	NA	NA	NA	0.0115687	NA	NA	NA	NA	NA	0.0433427	NA	NA	NA	NA	NA
on.gene.LG1.322	E020	NA	NA	0.0277157	NA	NA	NA	NA	0.0198446	NA	NA	NA	NA	0.005384	0.00165881	NA
on.gene.LG1.322	E021	NA	NA	NA	NA	NA	NA	NA	NA	0.0467291	NA	0.000289088	NA	NA	NA	NA
on.gene.LG1.322	E022	NA	NA	NA	NA	NA	NA	NA	NA	NA	NA	0.0044223	0.00103283	0.000152518	NA	NA
on.gene.LG1.322	E023	NA	NA	NA	NA	0.00240631	NA	0.00187033	NA	NA	NA	NA	NA	NA	NA	NA
on.gene.LG1.323	E001	NA	NA	NA	NA	NA	NA	NA	NA	NA	NA	NA	0.0272755	NA	NA	NA
on.gene.LG1.324	E001	NA	NA	NA	NA	NA	NA	NA	NA	NA	NA	0.0465196	NA	NA	NA	NA
on.gene.LG1.324	E004	NA	NA	NA	NA	0.000114856	NA	0.0203227	NA	NA	NA	NA	NA	0.0195423	NA	NA
on.gene.LG1.324	E005	NA	NA	NA	NA	0.000209836	NA	NA	NA	NA	0.0440111	NA	NA	NA	NA	NA
on.gene.LG1.324	E008	NA	NA	NA	NA	NA	NA	NA	NA	NA	NA	NA	0.0115229	NA	NA	NA
on.gene.LG1.324	E013	NA	NA	NA	NA	0.00271414	NA	0.0193163	NA	NA	0.00163325	NA	NA	NA	NA	NA
on.gene.LG1.324	E014	NA	NA	NA	NA	0.00174813	NA	0.00148153	NA	NA	NA	0.0306842	NA	NA	NA	NA
on.gene.LG1.324	E017	NA	NA	NA	NA	NA	NA	NA	NA	0.0383631	NA	NA	NA	0.00822481	NA	NA
on.gene.LG1.328	E001	NA	0.0237842	0.00192691	NA	0.0499741	NA	NA	NA	NA	0.000354643	NA	0.0131728	0.0237578	NA	0.0279498
on.gene.LG1.328	E002	NA	NA	NA	0.0357477	NA	NA	NA	NA	NA	NA	0.0209508	NA	NA	NA	NA
on.gene.LG1.328	E004	NA	NA	NA	NA	0.000345796	NA	NA	NA	NA	0.0444608	0.0428543	NA	0.00324375	NA	NA
on.gene.LG1.328	E005	NA	NA	NA	NA	NA	NA	NA	NA	NA	0.0355497	NA	0.0220941	0.0128482	NA	NA
on.gene.LG1.328	E006	NA	NA	NA	NA	NA	NA	NA	NA	NA	0.023916	NA	NA	NA	NA	NA
on.gene.LG1.328	E013	NA	NA	NA	0.00476581	NA	NA	NA	NA	NA	NA	0.00453648	NA	NA	NA	NA
on.gene.LG1.328	E014	0.0327044	0.000861758	NA	0.00219205	NA	NA	NA	NA	NA	NA	0.000146031	NA	NA	NA	NA
on.gene.LG1.3290001	E001	NA	NA	NA	NA	NA	NA	NA	NA	NA	0.0229139	NA	NA	NA	NA	NA
on.gene.LG1.3290001	E013	NA	NA	NA	NA	NA	NA	NA	NA	NA	NA	0.0453253	NA	NA	NA	NA
on.gene.LG1.3290001	E014	NA	NA	NA	NA	NA	0.0242192	0.0476627	NA	NA	0.0144773	0.0495445	NA	NA	NA	NA
on.gene.LG1.33	E002	NA	NA	NA	NA	NA	NA	NA	NA	NA	NA	NA	0.00204389	0.0247281	NA	NA
on.gene.LG1.33	E003	NA	NA	NA	NA	NA	NA	NA	NA	NA	NA	NA	NA	0.0450143	NA	NA
on.gene.LG1.33	E004	NA	NA	NA	NA	NA	NA	0.0168289	NA	NA	NA	NA	NA	0.00194011	NA	0.0132313
on.gene.LG1.33	E005	NA	NA	NA	NA	NA	NA	0.0107702	NA	NA	NA	NA	NA	NA	NA	NA
on.gene.LG1.33	E006	NA	NA	NA	NA	NA	NA	0.0154351	NA	NA	NA	NA	0.0198195	NA	NA	NA
on.gene.LG1.33	E009	NA	NA	NA	NA	NA	NA	0.032642	NA	NA	NA	0.00176485	NA	0.000859313	NA	NA
on.gene.LG1.33	E010	NA	NA	NA	NA	NA	NA	NA	NA	NA	NA	0.000127867	NA	0.0010484	NA	NA
on.gene.LG1.33	E016	NA	NA	NA	NA	0.0470199	NA	NA	NA	NA	NA	NA	NA	NA	NA	NA
on.gene.LG1.33	E020	NA	NA	NA	NA	NA	NA	NA	NA	NA	NA	NA	0.0412952	NA	NA	NA
on.gene.LG1.33	E036	NA	NA	NA	NA	NA	NA	NA	NA	NA	NA	NA	NA	0.0173616	NA	NA
on.gene.LG1.33	E039	NA	NA	NA	NA	NA	NA	NA	NA	NA	NA	NA	NA	0.0129573	NA	NA
on.gene.LG1.33	E043	NA	NA	NA	NA	NA	NA	NA	NA	NA	NA	NA	0.0172513	NA	NA	NA
on.gene.LG1.33	E045	NA	NA	0.0296993	NA	0.014155	NA	NA	NA	NA	NA	0.00622159	NA	0.000193619	NA	NA
on.gene.LG1.33	E046	NA	NA	NA	NA	0.0462448	NA	NA	NA	NA	0.00661068	0.0151369	0.000213217	0.000323877	NA	NA
on.gene.LG1.33	E047	NA	NA	NA	NA	0.011359	NA	0.000474301	NA	NA	NA	NA	0.0134698	0.000211176	NA	NA
on.gene.LG1.330	E001	NA	NA	NA	NA	NA	NA	NA	NA	NA	NA	NA	0.0352321	0.00956932	NA	0.0193959
on.gene.LG1.330	E002	NA	NA	NA	0.0433308	0.00107123	NA	0.000550571	NA	NA	NA	0.00442868	NA	NA	NA	NA
on.gene.LG1.330	E003	NA	NA	NA	0.00702516	0.00384016	NA	0.00170031	NA	NA	NA	0.00045504	0.000243019	NA	NA	NA
on.gene.LG1.330	E004	NA	NA	NA	NA	NA	NA	NA	NA	NA	0.0236492	0.00129031	0.00319985	0.0135197	NA	NA
on.gene.LG1.330	E005	NA	NA	NA	NA	NA	NA	NA	NA	NA	NA	NA	NA	0.0344253	NA	NA
on.gene.LG1.330	E007	NA	NA	NA	NA	0.0498665	NA	NA	NA	NA	NA	NA	0.0214776	NA	NA	NA
on.gene.LG1.330	E012	NA	NA	NA	NA	NA	NA	NA	NA	NA	NA	NA	NA	0.0386068	NA	NA
on.gene.LG1.330	E013	NA	NA	NA	NA	NA	NA	NA	NA	NA	NA	0.0057915	0.00151671	0.0021115	NA	NA
on.gene.LG1.330	E014	NA	NA	NA	NA	NA	NA	NA	NA	NA	0.00897519	NA	0.0111242	0.0483028	NA	NA
on.gene.LG1.330	E018	NA	NA	0.00516921	NA	NA	NA	NA	NA	NA	NA	NA	NA	NA	NA	NA
on.gene.LG1.331	E003	NA	NA	NA	NA	NA	NA	NA	NA	NA	NA	NA	0.0291369	NA	NA	NA
on.gene.LG1.331	E005	NA	0.00648456	NA	NA	NA	NA	NA	NA	NA	NA	NA	NA	NA	NA	NA
on.gene.LG1.331	E006	NA	NA	NA	NA	0.000893905	NA	NA	0.00815562	NA	NA	NA	0.00239671	NA	NA	NA
on.gene.LG1.331	E008	NA	NA	NA	NA	NA	NA	NA	NA	NA	NA	NA	0.0191865	0.0263811	NA	NA
on.gene.LG1.331	E009	NA	NA	NA	NA	NA	NA	NA	NA	NA	NA	NA	0.00534296	NA	NA	NA
on.gene.LG1.332	E013	NA	NA	NA	NA	NA	NA	NA	NA	NA	NA	NA	0.0304967	NA	NA	NA
on.gene.LG1.332	E016	NA	NA	NA	NA	NA	NA	NA	NA	NA	NA	NA	0.0441914	NA	NA	NA
on.gene.LG1.332	E024	NA	NA	NA	NA	NA	NA	NA	NA	NA	NA	NA	0.0474388	NA	NA	NA
on.gene.LG1.332	E025	NA	NA	NA	NA	NA	NA	NA	NA	NA	NA	NA	0.0103621	NA	NA	NA
on.gene.LG1.336	E009	NA	NA	NA	0.0383452	NA	NA	NA	NA	NA	NA	NA	NA	NA	NA	NA
on.gene.LG1.337	E001	NA	NA	NA	NA	NA	NA	0.000388271	0.0391511	NA	NA	NA	NA	NA	NA	NA
on.gene.LG1.337	E002	NA	NA	NA	NA	NA	NA	0.0409623	NA	NA	NA	NA	NA	0.000961713	NA	0.00188141
on.gene.LG1.337	E003	NA	NA	NA	NA	NA	NA	NA	NA	NA	NA	NA	0.0161427	0.00311093	NA	NA
on.gene.LG1.337	E004	NA	NA	NA	NA	NA	NA	NA	NA	NA	0.00401924	NA	0.00161156	0.000118416	NA	NA
on.gene.LG1.337	E005	NA	NA	NA	NA	0.0273407	NA	NA	NA	NA	0.0259196	NA	0.00196416	NA	NA	NA
on.gene.LG1.337	E010	NA	NA	NA	NA	NA	NA	NA	NA	NA	NA	NA	NA	0.0129224	NA	NA
on.gene.LG1.337	E011	NA	NA	NA	NA	NA	NA	NA	NA	NA	NA	NA	0.00741639	NA	NA	NA
on.gene.LG1.337	E012	NA	NA	NA	NA	NA	NA	NA	NA	NA	NA	NA	0.010963	0.00509903	NA	NA
on.gene.LG1.338	E001	NA	NA	NA	0.0181505	NA	NA	NA	NA	NA	NA	NA	NA	NA	NA	NA
on.gene.LG1.338	E003	NA	NA	NA	0.00180307	NA	NA	NA	NA	NA	NA	NA	NA	NA	NA	NA
on.gene.LG1.338	E009	NA	NA	NA	NA	NA	NA	NA	NA	NA	NA	NA	0.0272151	NA	NA	NA
on.gene.LG1.34	E001	NA	NA	NA	0.000998944	NA	NA	0.0304842	NA	NA	NA	0.000823601	NA	0.0345081	NA	NA
on.gene.LG1.34	E004	NA	NA	NA	NA	NA	NA	NA	NA	NA	NA	0.0255413	NA	NA	NA	NA
on.gene.LG1.341	E013	NA	0.0359057	NA	NA	0.0149612	NA	NA	NA	NA	NA	NA	0.000821512	NA	NA	NA
on.gene.LG1.341	E019	NA	NA	NA	NA	0.0254078	NA	NA	NA	NA	NA	NA	0.0188975	NA	NA	NA
on.gene.LG1.342	E002	NA	NA	NA	NA	0.049964	NA	NA	NA	NA	NA	0.00438454	0.000505863	0.0013118	NA	NA
on.gene.LG1.342	E004	NA	NA	NA	NA	0.000615079	NA	0.0273958	NA	NA	NA	0.0348904	NA	0.00305128	NA	NA
on.gene.LG1.342	E006	NA	NA	NA	NA	0.0241938	NA	NA	NA	NA	NA	NA	0.0181898	NA	NA	NA
on.gene.LG1.342	E019	NA	NA	NA	NA	NA	NA	NA	NA	NA	NA	NA	0.0222699	NA	NA	NA
on.gene.LG1.343	E001	NA	NA	NA	NA	NA	NA	NA	NA	NA	NA	NA	0.0375079	0.0135862	NA	NA
on.gene.LG1.343	E002	NA	NA	0.000823032	0.000144158	0.00146488	0.00410421	0.000224469	NA	NA	NA	NA	NA	NA	NA	NA
on.gene.LG1.343	E004	NA	NA	NA	NA	NA	NA	NA	NA	NA	NA	NA	NA	0.0176553	NA	NA
on.gene.LG1.343	E005	NA	NA	NA	NA	NA	NA	NA	NA	NA	NA	NA	NA	0.0126989	NA	NA
on.gene.LG1.343	E006	NA	NA	NA	0.00116904	NA	NA	NA	NA	NA	NA	0.00868418	NA	NA	NA	NA
on.gene.LG1.343	E010	NA	NA	NA	NA	NA	NA	NA	NA	NA	NA	NA	0.0470735	NA	NA	NA
on.gene.LG1.343	E013	NA	NA	NA	NA	NA	NA	NA	NA	NA	NA	NA	NA	NA	NA	0.035167
on.gene.LG1.344	E003	NA	NA	NA	NA	0.00475627	NA	NA	NA	NA	NA	NA	NA	NA	NA	NA
on.gene.LG1.344	E007	NA	NA	NA	NA	0.0217944	NA	NA	NA	NA	NA	NA	NA	NA	NA	NA
on.gene.LG1.344	E010	NA	NA	NA	0.00870553	NA	NA	NA	NA	NA	NA	NA	NA	NA	NA	NA
on.gene.LG1.344	E011	NA	NA	NA	NA	NA	NA	NA	0.00709487	NA	NA	NA	0.0080661	NA	NA	NA
on.gene.LG1.344	E013	NA	NA	0.0361072	NA	0.000606832	NA	NA	NA	NA	NA	NA	0.00953253	NA	NA	NA
on.gene.LG1.344	E014	NA	0.0138904	NA	NA	0.0113476	NA	NA	NA	NA	NA	NA	NA	NA	NA	NA
on.gene.LG1.344	E018	NA	NA	NA	NA	NA	NA	NA	NA	NA	NA	0.00925261	NA	NA	NA	NA
on.gene.LG1.344	E019	NA	NA	NA	0.0188584	NA	NA	NA	NA	NA	NA	0.0235115	NA	NA	NA	NA
on.gene.LG1.344	E021	NA	0.0206175	NA	NA	NA	NA	NA	NA	NA	NA	NA	NA	NA	NA	NA
on.gene.LG1.344	E022	NA	0.0325692	NA	NA	NA	NA	NA	NA	NA	NA	0.00453682	NA	NA	NA	NA
on.gene.LG1.344	E023	NA	0.000890275	NA	0.0210491	NA	NA	NA	NA	NA	NA	0.00030606	NA	NA	NA	NA
on.gene.LG1.344	E024	NA	0.00238341	NA	NA	NA	NA	NA	NA	NA	NA	0.0488079	NA	NA	NA	NA
on.gene.LG1.344	E025	NA	NA	NA	NA	0.0355216	NA	NA	0.00454023	NA	NA	NA	0.0174963	NA	NA	NA
on.gene.LG1.344	E026	NA	NA	NA	0.00520642	NA	NA	NA	0.0135155	NA	NA	NA	0.00128855	NA	NA	0.0215244
on.gene.LG1.344	E027	NA	0.0093801	0.0135732	0.00253032	NA	NA	NA	NA	NA	NA	NA	NA	NA	NA	NA
on.gene.LG1.344	E028	NA	0.00631371	NA	0.0399975	NA	NA	NA	0.00016048	NA	0.000237563	0.00766584	NA	NA	NA	NA
on.gene.LG1.344	E029	NA	0.0178749	0.0068971	0.0222063	NA	NA	NA	0.00717146	NA	0.00967521	0.0242843	NA	NA	NA	NA
on.gene.LG1.345	E001	NA	0.010545	NA	NA	NA	NA	NA	NA	NA	NA	NA	0.00227807	NA	NA	NA
on.gene.LG1.345	E003	NA	0.00805551	NA	NA	0.00111887	NA	NA	NA	NA	NA	NA	0.0146252	NA	NA	NA
on.gene.LG1.346	E008	NA	0.00694256	NA	NA	NA	NA	NA	NA	NA	NA	0.030198	NA	NA	NA	NA
on.gene.LG1.347	E001	NA	NA	NA	0.048131	0.0347452	NA	NA	NA	NA	NA	NA	NA	NA	NA	NA
on.gene.LG1.347	E003	NA	NA	NA	NA	NA	NA	NA	NA	NA	NA	NA	NA	NA	NA	0.0230187
on.gene.LG1.347	E020	NA	NA	NA	NA	NA	NA	NA	NA	0.00624276	NA	NA	NA	NA	NA	0.00482862
on.gene.LG1.347	E021	NA	NA	NA	0.00943622	NA	NA	NA	NA	NA	NA	NA	NA	NA	NA	0.0150364
on.gene.LG1.348	E007	NA	NA	NA	NA	NA	NA	NA	0.0335008	NA	0.00677064	NA	NA	NA	0.00678603	NA
on.gene.LG1.354	E001	NA	0.0010465	0.00390228	NA	NA	NA	NA	NA	NA	0.000149704	NA	NA	NA	NA	0.00240467
on.gene.LG1.354	E002	NA	NA	NA	NA	NA	NA	NA	NA	NA	NA	NA	NA	NA	NA	0.000501378
on.gene.LG1.354	E003	NA	0.00592112	NA	NA	0.00193321	NA	NA	0.0453133	NA	NA	NA	NA	NA	NA	NA
on.gene.LG1.354	E004	NA	NA	0.0385644	0.0198433	0.00011259	NA	NA	NA	NA	0.00360815	0.00032398	NA	0.0282275	NA	NA
on.gene.LG1.354	E005	NA	NA	NA	0.00429141	NA	NA	NA	NA	NA	0.00880366	NA	NA	0.00611089	NA	NA
on.gene.LG1.354	E006	NA	NA	NA	NA	NA	NA	NA	NA	NA	NA	0.0141146	NA	NA	NA	NA
on.gene.LG1.354	E007	NA	NA	NA	0.000679587	NA	NA	NA	NA	NA	0.0337458	NA	NA	0.0182415	NA	NA
on.gene.LG1.354	E008	NA	0.00829826	NA	NA	0.00638035	NA	NA	0.0291827	NA	NA	NA	NA	0.0431955	NA	NA
on.gene.LG1.354	E010	NA	0.0169021	NA	NA	0.000315923	NA	NA	NA	NA	NA	NA	NA	0.0112276	NA	NA
on.gene.LG1.354	E011	NA	0.00926949	NA	NA	0.000112948	NA	0.047189	NA	NA	0.0243802	NA	NA	0.00228059	NA	NA
on.gene.LG1.356	E001	NA	NA	NA	0.0186934	NA	NA	NA	NA	NA	NA	NA	NA	NA	NA	NA
on.gene.LG1.356	E002	NA	NA	NA	0.0154657	NA	NA	NA	NA	NA	NA	0.00181773	NA	NA	NA	NA
on.gene.LG1.356	E006	NA	NA	NA	NA	NA	NA	NA	NA	NA	NA	0.0399102	NA	NA	NA	NA
on.gene.LG1.356	E007	NA	NA	0.000184335	NA	0.00141781	NA	NA	NA	NA	NA	NA	NA	NA	NA	NA
on.gene.LG1.356	E010	NA	NA	0.0202417	NA	NA	NA	NA	NA	NA	NA	NA	NA	NA	NA	NA
on.gene.LG1.356	E011	0.0169226	0.00281147	NA	NA	NA	NA	NA	NA	NA	NA	0.0293584	NA	NA	NA	NA
on.gene.LG1.356	E012	NA	NA	0.043874	NA	NA	NA	0.000476449	NA	0.0475243	NA	NA	NA	0.00134	NA	NA
on.gene.LG1.36	E001	NA	NA	NA	0.0088262	NA	NA	NA	NA	NA	NA	NA	NA	NA	NA	NA
on.gene.LG1.36	E002	NA	NA	NA	NA	NA	NA	NA	NA	NA	NA	0.00182235	0.00332761	NA	NA	NA
on.gene.LG1.36	E004	NA	NA	NA	NA	NA	NA	NA	NA	NA	NA	0.000214917	NA	NA	NA	0.0335442
on.gene.LG1.360	E001	NA	0.026371	NA	NA	NA	NA	NA	NA	NA	NA	NA	0.000451674	0.00212259	NA	NA
on.gene.LG1.360	E002	NA	0.0105757	NA	NA	NA	NA	NA	0.00121272	NA	NA	NA	0.000104954	NA	NA	NA
on.gene.LG1.360	E003	NA	0.00128884	NA	NA	0.0128625	NA	NA	NA	NA	NA	NA	NA	0.0106526	0.0473128	NA
on.gene.LG1.360	E004	NA	0.00360487	NA	NA	0.032861	NA	NA	0.000991609	NA	NA	NA	NA	0.0285892	NA	NA
on.gene.LG1.360	E005	NA	0.0059052	NA	NA	0.00881854	NA	NA	0.00990214	NA	NA	NA	NA	NA	NA	NA
on.gene.LG1.360	E006	NA	0.000870896	NA	NA	NA	NA	NA	0.00642639	NA	NA	NA	NA	0.0256932	NA	NA
on.gene.LG1.360	E007	NA	NA	NA	NA	NA	NA	NA	NA	NA	NA	NA	NA	0.0170145	NA	NA
on.gene.LG1.360	E008	NA	NA	NA	NA	NA	NA	NA	0.00269445	NA	NA	NA	NA	0.00133073	NA	0.00414273
on.gene.LG1.360	E009	NA	0.000183578	NA	NA	0.0157801	NA	NA	0.000216087	NA	NA	NA	NA	0.00102518	NA	0.0494511
on.gene.LG1.360	E010	NA	0.00065807	NA	NA	0.000679213	NA	NA	0.00056498	NA	NA	NA	NA	0.00106232	NA	NA
on.gene.LG1.360	E011	NA	0.00433283	NA	NA	0.0211664	NA	NA	0.0283623	NA	NA	NA	NA	0.0148398	NA	NA
on.gene.LG1.360	E012	NA	NA	NA	NA	NA	NA	NA	NA	NA	NA	NA	0.000485731	NA	NA	NA
on.gene.LG1.360	E014	NA	0.0218851	NA	NA	NA	NA	NA	0.0151052	NA	NA	NA	0.000384709	NA	NA	NA
on.gene.LG1.360	E015	NA	NA	NA	NA	0.0014457	NA	NA	NA	NA	0.000387745	0.0021986	NA	0.00175146	NA	NA
on.gene.LG1.360	E016	NA	NA	NA	NA	NA	NA	NA	0.0391971	NA	NA	NA	0.000231399	NA	NA	NA
on.gene.LG1.360	E018	NA	NA	NA	NA	NA	NA	NA	NA	NA	NA	NA	0.0273235	0.0254535	NA	NA
on.gene.LG1.360	E020	NA	NA	NA	NA	NA	NA	NA	NA	NA	NA	NA	NA	0.0087839	NA	NA
on.gene.LG1.360	E021	NA	NA	NA	NA	NA	NA	NA	NA	NA	NA	NA	0.0205023	0.0157245	NA	NA
on.gene.LG1.360	E024	NA	0.0152705	NA	NA	NA	NA	NA	0.00389392	NA	NA	NA	NA	NA	0.0170613	0.0386049
on.gene.LG1.360	E025	NA	0.000118449	NA	NA	NA	NA	NA	NA	NA	NA	NA	NA	0.00271362	0.00350884	0.0198808
on.gene.LG1.360	E026	NA	0.0116555	NA	NA	NA	0.0317008	NA	0.000457188	NA	NA	NA	NA	0.000113169	0.0023952	0.030073
on.gene.LG1.360	E027	NA	0.0481326	NA	NA	NA	NA	NA	0.00924958	NA	NA	NA	0.000290054	0.00150053	0.042784	NA
on.gene.LG1.362	E001	NA	0.00187416	NA	0.000453239	NA	NA	NA	NA	NA	NA	0.0101383	NA	NA	NA	0.0117629
on.gene.LG1.362	E002	0.00126024	NA	NA	NA	NA	NA	0.00466312	NA	NA	0.0143927	NA	0.00399425	NA	NA	NA
on.gene.LG1.362	E003	NA	0.00114182	NA	0.0385039	NA	NA	0.00119066	NA	NA	0.0322587	NA	0.000396	NA	NA	NA
on.gene.LG1.362	E004	NA	0.000120425	NA	NA	NA	NA	NA	0.0226795	NA	NA	NA	NA	NA	NA	NA
on.gene.LG1.362	E005	NA	NA	0.000428644	NA	NA	NA	NA	NA	0.00252375	NA	NA	NA	0.00489427	NA	NA
on.gene.LG1.362	E007	NA	0.000742152	0.0173583	0.0107516	NA	NA	0.0395317	NA	0.0296061	0.000461646	NA	NA	0.000686369	NA	NA
on.gene.LG1.362	E009	NA	0.011263	NA	NA	NA	NA	NA	NA	NA	NA	NA	0.00318217	NA	NA	NA
on.gene.LG1.362	E010	NA	0.0162643	NA	0.000367443	NA	NA	NA	NA	NA	NA	0.0245793	NA	NA	NA	0.0285497
on.gene.LG1.362	E011	0.0134847	NA	0.00124638	NA	NA	NA	NA	0.0470734	NA	0.0020074	NA	NA	NA	NA	NA
on.gene.LG1.362	E013	0.00923165	NA	0.0414652	NA	NA	NA	NA	0.00965961	NA	0.0147905	NA	NA	NA	NA	NA
on.gene.LG1.362	E015	NA	NA	NA	NA	0.045703	NA	NA	NA	NA	NA	NA	0.000644316	NA	NA	NA
on.gene.LG1.363	E001	NA	NA	NA	NA	NA	NA	NA	NA	NA	NA	NA	NA	0.0144914	NA	NA
on.gene.LG1.363	E002	NA	NA	NA	NA	NA	NA	NA	NA	NA	NA	0.0495139	NA	NA	NA	NA
on.gene.LG1.363	E006	NA	NA	NA	NA	NA	NA	NA	NA	NA	NA	NA	NA	0.021422	NA	NA
on.gene.LG1.363	E015	NA	NA	NA	NA	NA	NA	NA	NA	NA	NA	NA	NA	0.00240446	NA	NA
on.gene.LG1.363	E016	NA	NA	NA	NA	NA	NA	NA	NA	NA	NA	NA	NA	0.00620275	NA	NA
on.gene.LG1.363	E017	NA	NA	NA	NA	NA	NA	NA	NA	NA	NA	NA	NA	0.023897	NA	NA
on.gene.LG1.363	E019	NA	NA	NA	NA	NA	NA	NA	NA	NA	NA	NA	NA	0.0442049	NA	NA
on.gene.LG1.364	E001	NA	NA	0.00270003	NA	NA	NA	NA	NA	NA	NA	NA	NA	NA	NA	NA
on.gene.LG1.364	E002	NA	NA	0.00079127	0.0224626	NA	NA	NA	NA	NA	0.0227297	NA	NA	NA	NA	NA
on.gene.LG1.364	E007	NA	NA	0.0101783	0.000627745	NA	NA	NA	NA	NA	NA	NA	NA	NA	NA	NA
on.gene.LG1.364	E008	NA	NA	0.0244592	0.00302471	NA	NA	NA	NA	NA	0.0266369	0.00207647	0.0422457	NA	0.0395415	0.00205841
on.gene.LG1.366	E007	NA	NA	NA	NA	NA	NA	NA	NA	NA	NA	0.0189752	NA	NA	NA	NA
on.gene.LG1.368	E002	NA	NA	NA	0.0494031	NA	NA	NA	NA	NA	NA	0.000587803	0.0275746	NA	NA	NA
on.gene.LG1.368	E003	NA	NA	NA	NA	NA	NA	NA	NA	NA	NA	0.00585616	0.00300614	NA	NA	NA
on.gene.LG1.368	E005	NA	NA	NA	NA	NA	NA	NA	NA	NA	NA	0.000801347	0.0192586	NA	NA	0.0250038
on.gene.LG1.368	E006	NA	NA	NA	0.0163342	NA	NA	NA	NA	NA	NA	NA	0.00265434	NA	NA	0.0413939
on.gene.LG1.3690001	E001	NA	0.0240696	0.00549331	NA	0.000108786	NA	NA	NA	NA	0.00592711	NA	NA	NA	NA	NA
on.gene.LG1.3690001	E002	NA	NA	0.00358005	NA	NA	NA	0.000464073	NA	NA	NA	NA	NA	NA	NA	NA
on.gene.LG1.3690001	E003	NA	NA	NA	NA	0.0368788	NA	NA	NA	NA	0.00225039	0.000471866	NA	0.000285171	NA	NA
on.gene.LG1.3690001	E005	NA	NA	0.000221059	NA	NA	NA	NA	NA	NA	NA	NA	NA	NA	NA	NA
on.gene.LG1.370	E006	NA	NA	NA	NA	NA	NA	NA	NA	NA	NA	0.0273933	0.000829851	NA	NA	NA
on.gene.LG1.370	E010	NA	NA	NA	NA	NA	NA	NA	NA	NA	NA	NA	0.0331084	NA	NA	NA
on.gene.LG1.374	E001	NA	0.0492667	NA	NA	NA	NA	NA	NA	NA	NA	NA	0.0254681	0.0499332	NA	NA
on.gene.LG1.374	E002	NA	0.038187	NA	NA	NA	NA	NA	NA	NA	NA	NA	0.00996592	0.035241	NA	NA
on.gene.LG1.374	E011	0.0211785	0.00743331	NA	NA	NA	NA	NA	NA	NA	0.0361958	NA	0.0249984	NA	NA	NA
on.gene.LG1.375	E001	NA	NA	NA	NA	NA	NA	NA	NA	NA	NA	0.0458823	NA	NA	NA	NA
on.gene.LG1.375	E002	NA	NA	NA	NA	NA	NA	NA	NA	NA	NA	0.0446448	NA	NA	NA	NA
on.gene.LG1.376	E001	NA	0.00164423	NA	NA	NA	NA	NA	NA	NA	NA	NA	NA	NA	NA	NA
on.gene.LG1.376	E002	NA	NA	NA	0.0499474	NA	NA	NA	NA	NA	NA	0.015372	NA	NA	NA	NA
on.gene.LG1.376	E004	NA	0.0450835	NA	NA	NA	NA	NA	NA	NA	NA	NA	NA	NA	NA	NA
on.gene.LG1.376	E005	NA	0.0163854	NA	0.0482354	NA	NA	NA	NA	NA	NA	0.0413236	NA	NA	NA	NA
on.gene.LG1.376	E006	NA	0.0326957	NA	NA	NA	NA	NA	NA	NA	NA	NA	NA	NA	NA	NA
on.gene.LG1.377	E001	NA	NA	NA	0.044516	NA	NA	NA	NA	NA	NA	NA	NA	0.00228059	NA	NA
on.gene.LG1.377	E002	NA	NA	NA	NA	NA	0.0195599	NA	NA	NA	NA	NA	NA	NA	NA	NA
on.gene.LG1.377	E003	NA	NA	NA	NA	NA	NA	NA	NA	NA	0.0226014	0.000394859	0.0157234	0.00068114	NA	NA
on.gene.LG1.377	E004	NA	NA	NA	NA	NA	NA	NA	NA	NA	NA	0.0150122	0.0268221	0.0318541	NA	NA
on.gene.LG1.377	E005	NA	NA	NA	NA	NA	NA	NA	NA	NA	NA	0.0178095	0.0292526	NA	NA	NA
on.gene.LG1.377	E006	NA	NA	NA	NA	NA	NA	NA	NA	NA	0.0102584	0.000129035	0.000984271	0.0169463	NA	NA
on.gene.LG1.377	E007	NA	NA	NA	0.00212233	0.0235928	NA	NA	NA	NA	0.00131592	NA	NA	NA	NA	NA
on.gene.LG1.377	E008	0.000166116	NA	NA	NA	NA	NA	NA	NA	NA	NA	NA	NA	NA	NA	0.000509884
on.gene.LG1.377	E009	NA	NA	NA	NA	0.0216062	NA	0.00746304	NA	NA	NA	NA	0.0114218	0.00308561	NA	NA
on.gene.LG1.377	E010	NA	0.00590255	0.000900845	NA	0.00324968	NA	0.00671321	NA	NA	NA	NA	NA	NA	NA	0.0464324
on.gene.LG1.377	E011	NA	NA	NA	NA	NA	NA	NA	NA	NA	NA	NA	NA	NA	NA	0.0417476
on.gene.LG1.380	E001	NA	0.0365119	NA	NA	NA	NA	NA	NA	NA	NA	NA	NA	NA	NA	NA
on.gene.LG1.380	E011	NA	NA	NA	0.00925929	NA	NA	NA	NA	NA	NA	0.0215187	NA	NA	NA	NA
on.gene.LG1.380	E013	NA	NA	NA	NA	NA	NA	NA	NA	NA	NA	NA	NA	0.0424917	NA	NA
on.gene.LG1.380	E014	NA	NA	NA	NA	NA	NA	0.0459417	NA	NA	NA	NA	NA	NA	NA	NA
on.gene.LG1.380	E015	NA	NA	NA	NA	NA	NA	0.00103669	NA	NA	NA	NA	NA	0.00397816	NA	0.0257743
on.gene.LG1.380	E016	NA	NA	NA	NA	0.0382819	NA	0.0035917	NA	NA	0.0352727	NA	0.00553619	0.000133594	NA	0.0244532
on.gene.LG1.380	E017	NA	NA	NA	NA	NA	NA	NA	NA	NA	0.0418178	NA	0.00577673	0.0491193	NA	NA
on.gene.LG1.382	E001	NA	NA	NA	NA	NA	NA	NA	NA	NA	NA	NA	0.0205241	NA	NA	NA
on.gene.LG1.389	E001	NA	0.0318205	NA	NA	NA	NA	NA	0.030415	NA	NA	NA	0.00353787	NA	NA	NA
on.gene.LG1.389	E002	NA	NA	NA	NA	0.000886472	NA	NA	NA	NA	0.0268499	NA	NA	0.00173398	NA	NA
on.gene.LG1.389	E003	NA	NA	NA	NA	NA	NA	NA	NA	NA	NA	NA	NA	0.0298553	NA	NA
on.gene.LG1.389	E010	NA	NA	NA	NA	NA	NA	NA	NA	NA	NA	NA	0.0263158	NA	NA	NA
on.gene.LG1.389	E012	NA	NA	NA	NA	NA	NA	NA	NA	NA	0.0495349	0.0420431	0.0127069	NA	NA	NA
on.gene.LG1.389	E014	NA	NA	NA	NA	0.0497326	NA	NA	0.0450648	NA	NA	NA	NA	NA	NA	NA
on.gene.LG1.389	E015	NA	NA	NA	NA	0.0363314	NA	NA	NA	NA	NA	NA	0.00119205	NA	NA	NA
on.gene.LG1.389	E016	NA	0.0254836	NA	NA	NA	NA	NA	NA	NA	NA	NA	NA	NA	NA	NA
on.gene.LG1.389	E018	NA	NA	NA	NA	NA	NA	NA	NA	NA	NA	NA	0.0209319	NA	NA	NA
on.gene.LG1.389	E022	NA	NA	NA	NA	NA	NA	NA	NA	NA	NA	NA	NA	NA	NA	0.0239574
on.gene.LG1.389	E023	NA	NA	NA	NA	NA	NA	NA	NA	NA	NA	NA	NA	NA	NA	0.0250987
on.gene.LG1.389	E024	NA	NA	NA	NA	0.0492201	NA	NA	NA	NA	NA	NA	NA	NA	NA	NA
on.gene.LG1.389	E025	NA	NA	NA	NA	NA	NA	NA	NA	NA	NA	0.0172389	NA	NA	NA	NA
on.gene.LG1.389	E026	NA	NA	NA	NA	NA	NA	NA	NA	NA	NA	0.00431694	NA	NA	NA	NA
on.gene.LG1.39	E010	NA	NA	NA	NA	0.0439184	NA	NA	NA	NA	NA	NA	NA	NA	NA	NA
on.gene.LG1.390	E010	NA	NA	NA	NA	NA	NA	NA	NA	NA	NA	NA	0.0365338	NA	NA	NA
on.gene.LG1.390	E013	NA	NA	NA	NA	NA	NA	NA	NA	NA	NA	0.000588647	NA	0.0111828	NA	NA
on.gene.LG1.390	E019	NA	NA	NA	0.0456813	NA	NA	NA	NA	NA	NA	NA	NA	NA	NA	NA
on.gene.LG1.392	E004	NA	NA	NA	NA	NA	NA	NA	NA	NA	NA	NA	NA	0.02932	NA	NA
on.gene.LG1.392	E005	NA	NA	NA	NA	NA	NA	0.00410266	NA	NA	NA	NA	NA	0.0191266	NA	0.0444112
on.gene.LG1.392	E006	NA	NA	NA	NA	NA	NA	NA	NA	NA	NA	0.000516037	0.00307873	NA	NA	NA
on.gene.LG1.392	E007	NA	NA	NA	NA	NA	NA	NA	NA	NA	NA	0.0310257	0.0150942	NA	NA	NA
on.gene.LG1.392	E015	NA	NA	NA	NA	0.034673	NA	NA	NA	NA	NA	NA	NA	NA	NA	NA
on.gene.LG1.393	E001	NA	NA	NA	NA	NA	NA	NA	NA	0.0320942	NA	NA	NA	NA	NA	NA
on.gene.LG1.393	E002	NA	NA	NA	NA	NA	NA	NA	NA	NA	NA	NA	0.0378551	NA	NA	NA
on.gene.LG1.393	E003	NA	NA	NA	NA	0.0240047	NA	NA	NA	NA	NA	NA	NA	NA	NA	NA
on.gene.LG1.393	E018	NA	NA	0.047591	NA	0.00667182	NA	NA	NA	NA	NA	NA	NA	NA	NA	NA
on.gene.LG1.393	E019	NA	NA	0.00314531	NA	0.00112028	NA	NA	NA	NA	0.0334738	NA	0.00843809	NA	NA	NA
on.gene.LG1.395	E001	NA	NA	NA	NA	NA	NA	NA	NA	NA	NA	0.0380518	NA	0.0209309	NA	NA
on.gene.LG1.395	E011	NA	NA	NA	NA	NA	NA	NA	NA	NA	NA	NA	0.0495393	NA	NA	NA
on.gene.LG1.396	E001	NA	NA	NA	NA	NA	NA	0.000891536	NA	NA	0.00242749	NA	NA	NA	NA	0.0110818
on.gene.LG1.396	E002	NA	NA	0.0031393	NA	NA	NA	0.000439754	NA	NA	NA	0.000366331	0.0479086	NA	NA	NA
on.gene.LG1.396	E003	0.0169226	0.0141513	NA	NA	NA	NA	NA	NA	NA	NA	0.0219525	NA	NA	NA	0.00169268
on.gene.LG1.396	E004	NA	0.00844296	NA	0.0159933	NA	NA	NA	NA	NA	NA	0.00130638	NA	NA	NA	0.0159644
on.gene.LG1.396	E008	NA	NA	NA	NA	0.0365742	NA	NA	NA	NA	NA	NA	0.000121844	NA	NA	NA
on.gene.LG1.396	E009	NA	0.0015976	NA	NA	0.0111396	NA	NA	NA	NA	NA	NA	0.000155355	0.0182614	NA	NA
on.gene.LG1.396	E010	NA	NA	NA	NA	NA	NA	0.0202521	NA	NA	0.00283177	NA	NA	NA	NA	NA
on.gene.LG1.398	E007	NA	0.00525373	NA	NA	0.0398462	NA	NA	NA	NA	NA	NA	NA	NA	NA	NA
on.gene.LG1.4	E003	NA	NA	NA	0.00143081	NA	NA	NA	NA	NA	NA	0.000189323	NA	NA	NA	NA
on.gene.LG1.4	E004	NA	NA	NA	0.0222622	NA	NA	NA	NA	NA	NA	0.0040865	NA	NA	NA	NA
on.gene.LG1.4	E024	NA	NA	NA	NA	NA	NA	NA	NA	NA	NA	0.0168751	NA	NA	NA	NA
on.gene.LG1.4	E029	NA	NA	NA	0.00504032	NA	NA	NA	NA	NA	NA	NA	NA	NA	NA	NA
on.gene.LG1.4	E030	NA	0.0146975	NA	0.0417998	NA	NA	NA	NA	NA	NA	NA	NA	NA	NA	NA
on.gene.LG1.40	E008	NA	NA	NA	NA	NA	NA	NA	NA	NA	NA	0.0091508	NA	NA	NA	NA
on.gene.LG1.40	E011	NA	NA	NA	0.0438994	NA	NA	NA	NA	NA	0.0374948	NA	NA	NA	NA	NA
on.gene.LG1.40	E012	NA	NA	NA	0.0226303	NA	NA	NA	NA	NA	NA	0.0293796	NA	NA	NA	NA
on.gene.LG1.40	E022	NA	NA	NA	NA	NA	NA	NA	NA	NA	NA	0.041333	NA	NA	NA	NA
on.gene.LG1.40	E023	NA	NA	NA	NA	NA	NA	NA	NA	NA	NA	0.0445115	NA	0.0453724	NA	NA
on.gene.LG1.40	E024	NA	NA	NA	NA	NA	NA	0.0376933	NA	NA	NA	NA	NA	0.00945873	NA	NA
on.gene.LG1.400	E010	NA	NA	NA	0.00210195	0.0371572	NA	NA	NA	NA	NA	0.00050736	0.0201449	NA	NA	NA
on.gene.LG1.4000001	E001	NA	NA	NA	NA	NA	NA	NA	NA	NA	NA	0.00960523	0.0478746	0.016747	NA	NA
on.gene.LG1.4000001	E003	NA	NA	NA	NA	NA	NA	NA	NA	NA	NA	NA	0.0279751	NA	NA	NA
on.gene.LG1.403	E001	NA	NA	NA	NA	0.0292858	NA	NA	NA	NA	NA	0.0204381	0.00330944	0.0110712	NA	NA
on.gene.LG1.403	E003	NA	NA	NA	NA	NA	NA	0.0273958	NA	NA	NA	NA	NA	NA	NA	NA
on.gene.LG1.403	E004	NA	NA	NA	NA	NA	NA	0.0464346	NA	NA	NA	NA	NA	NA	NA	NA
on.gene.LG1.403	E007	NA	NA	NA	NA	0.0465236	NA	0.0229831	NA	NA	NA	NA	NA	NA	NA	NA
on.gene.LG1.403	E008	NA	NA	0.00209575	0.0344451	NA	NA	NA	NA	NA	NA	NA	NA	0.0131895	NA	NA
on.gene.LG1.403	E009	NA	NA	NA	NA	NA	NA	NA	NA	NA	NA	NA	NA	NA	0.0177211	0.0313031
on.gene.LG1.404	E001	NA	NA	NA	NA	0.00492033	NA	NA	0.0376553	NA	0.000623572	NA	NA	NA	NA	0.00379191
on.gene.LG1.404	E002	NA	0.0250782	NA	NA	NA	NA	NA	NA	NA	0.00564235	0.000534909	NA	NA	NA	0.0372554
on.gene.LG1.404	E003	NA	0.0212662	0.00113698	0.00595901	NA	NA	NA	0.00816158	NA	0.0460388	NA	NA	NA	NA	NA
on.gene.LG1.404	E004	NA	NA	NA	NA	NA	NA	NA	0.0179784	NA	NA	NA	0.0303324	NA	NA	NA
on.gene.LG1.404	E008	NA	NA	NA	NA	NA	NA	NA	0.000449811	NA	NA	NA	0.00539274	NA	NA	NA
on.gene.LG1.404	E009	NA	0.00778011	NA	NA	0.0120982	NA	NA	0.000248189	NA	NA	NA	NA	0.020621	NA	NA
on.gene.LG1.404	E010	NA	0.0344794	NA	NA	NA	NA	NA	0.0221707	NA	NA	NA	NA	0.000956402	NA	NA
on.gene.LG1.404	E011	NA	NA	NA	NA	0.0429263	NA	NA	NA	NA	0.00438643	0.00538796	NA	0.000221304	NA	NA
on.gene.LG1.404	E012	NA	NA	NA	NA	0.00408759	NA	NA	0.047279	NA	NA	NA	NA	NA	NA	NA
on.gene.LG1.404	E013	NA	NA	NA	NA	0.00861012	NA	NA	NA	0.00107062	NA	NA	0.00363549	NA	NA	NA
on.gene.LG1.404	E015	NA	NA	NA	NA	NA	NA	NA	NA	NA	NA	NA	0.0412093	NA	NA	NA
on.gene.LG1.404	E016	NA	NA	NA	NA	NA	NA	NA	NA	NA	0.00404874	NA	NA	0.0480682	NA	NA
on.gene.LG1.404	E017	NA	NA	NA	NA	NA	NA	NA	NA	NA	0.0202945	NA	NA	0.0466211	NA	NA
on.gene.LG1.404	E019	NA	NA	NA	NA	NA	NA	NA	NA	NA	NA	0.0351039	0.00457412	0.0110363	NA	NA
on.gene.LG1.404	E020	NA	NA	NA	NA	NA	NA	NA	NA	NA	NA	NA	0.00168342	NA	NA	NA
on.gene.LG1.404	E023	NA	0.024092	NA	NA	NA	NA	NA	0.00778087	NA	NA	NA	0.0217033	NA	NA	NA
on.gene.LG1.404	E024	NA	0.0251153	NA	NA	NA	NA	NA	0.00069219	NA	NA	NA	0.000300918	NA	NA	NA
on.gene.LG1.404	E026	NA	0.00136756	NA	NA	0.00181835	NA	NA	0.00198537	NA	NA	NA	NA	0.0124925	NA	NA
on.gene.LG1.404	E027	NA	NA	NA	NA	NA	NA	NA	0.000250172	NA	NA	NA	NA	NA	NA	0.0442102
on.gene.LG1.404	E028	NA	NA	NA	0.0455811	NA	NA	NA	0.00034558	NA	NA	NA	NA	NA	NA	0.0131769
on.gene.LG1.404	E029	NA	0.0242809	NA	NA	NA	NA	NA	0.023503	NA	NA	NA	0.00831506	NA	NA	NA
on.gene.LG1.404	E030	NA	0.00927157	NA	NA	NA	NA	NA	0.0336847	NA	NA	NA	0.00494125	NA	NA	NA
on.gene.LG1.408	E001	NA	NA	NA	NA	NA	NA	NA	NA	NA	0.0339423	NA	0.00729631	0.00122962	NA	NA
on.gene.LG1.408	E002	NA	NA	NA	NA	0.00425381	NA	0.0100702	NA	NA	NA	NA	NA	NA	NA	NA
on.gene.LG1.408	E003	NA	0.000323667	NA	0.000104493	NA	NA	NA	NA	NA	NA	0.0369433	NA	NA	NA	0.000211765
on.gene.LG1.408	E004	NA	0.00432343	NA	NA	NA	NA	0.0135688	NA	NA	NA	NA	NA	0.00154602	NA	NA
on.gene.LG1.408	E008	NA	NA	NA	NA	NA	0.0418025	NA	NA	NA	0.0348084	0.00150404	0.0217208	NA	NA	NA
on.gene.LG1.408	E009	NA	NA	NA	NA	NA	NA	NA	NA	NA	NA	NA	NA	0.000211369	NA	0.0298666
on.gene.LG1.408	E010	NA	NA	NA	NA	0.00555133	NA	NA	NA	0.0210903	NA	NA	NA	NA	NA	NA
on.gene.LG1.408	E011	NA	NA	NA	NA	NA	NA	NA	0.00488475	NA	NA	NA	NA	NA	NA	NA
on.gene.LG1.408	E012	NA	NA	NA	0.00146598	NA	NA	NA	0.00359994	NA	NA	NA	NA	0.00173895	NA	NA
on.gene.LG1.408	E013	NA	NA	NA	NA	NA	NA	NA	NA	NA	NA	0.0228979	0.000343015	0.00672018	NA	NA
on.gene.LG1.408	E015	NA	NA	NA	0.000445434	NA	NA	NA	NA	NA	NA	NA	NA	NA	NA	NA
on.gene.LG1.408	E016	0.0108998	0.00359883	NA	NA	NA	NA	NA	NA	NA	NA	NA	NA	0.00486201	NA	NA
on.gene.LG1.408	E017	NA	0.0106581	NA	NA	0.00267087	NA	NA	0.00626449	NA	NA	NA	NA	NA	NA	NA
on.gene.LG1.408	E018	NA	0.000693428	NA	NA	0.000310966	NA	NA	NA	0.000335667	NA	NA	0.0057951	NA	NA	NA
on.gene.LG1.408	E019	NA	0.0490425	NA	NA	0.000485249	NA	NA	NA	0.000172503	NA	NA	0.0021856	NA	NA	NA
on.gene.LG1.408	E020	NA	NA	NA	NA	0.00034133	NA	NA	NA	NA	NA	NA	NA	NA	NA	NA
on.gene.LG1.408	E021	NA	0.0105309	NA	NA	NA	NA	NA	NA	NA	NA	NA	NA	NA	NA	NA
on.gene.LG1.408	E022	NA	0.0202254	NA	NA	0.00474977	NA	NA	0.000416337	0.000138003	NA	NA	0.00129454	NA	NA	NA
on.gene.LG1.408	E023	NA	0.00169988	NA	NA	NA	NA	NA	NA	NA	NA	NA	0.000333226	NA	NA	NA
on.gene.LG1.408	E024	NA	0.00252562	NA	NA	NA	NA	NA	NA	NA	NA	NA	NA	0.0188147	NA	0.0237324
on.gene.LG1.408	E025	NA	0.0174685	NA	NA	0.00119664	NA	NA	NA	NA	0.0249792	NA	0.00094911	0.0084129	NA	0.0147553
on.gene.LG1.408	E026	NA	0.0387147	NA	NA	NA	NA	NA	NA	0.00037624	0.0376919	NA	0.0354039	NA	NA	NA
on.gene.LG1.408	E027	NA	0.00177949	NA	NA	0.00188348	NA	NA	NA	0.00018815	NA	NA	NA	NA	NA	NA
on.gene.LG1.408	E028	NA	0.0212979	NA	NA	0.00618266	NA	NA	0.000168316	0.0138716	NA	NA	0.00176847	NA	NA	NA
on.gene.LG1.408	E029	NA	NA	NA	NA	0.0216767	NA	NA	0.000517857	0.00675862	NA	NA	NA	NA	NA	NA
on.gene.LG1.4080001	E003	NA	NA	NA	0.0139691	0.00795929	NA	NA	NA	NA	NA	0.000227443	NA	0.00229933	NA	NA
on.gene.LG1.4080001	E006	NA	NA	0.00173744	NA	NA	NA	NA	NA	NA	0.00236266	NA	NA	NA	NA	NA
on.gene.LG1.409	E001	NA	NA	NA	NA	NA	NA	NA	NA	NA	0.00681733	NA	NA	NA	NA	NA
on.gene.LG1.409	E007	NA	NA	NA	NA	NA	NA	NA	NA	NA	NA	NA	0.00304723	NA	NA	NA
on.gene.LG1.409	E008	NA	NA	NA	NA	NA	NA	NA	NA	NA	0.00250633	0.00125297	0.00236975	0.0455248	NA	NA
on.gene.LG1.41	E007	NA	NA	NA	NA	NA	NA	NA	NA	NA	NA	0.0126659	NA	NA	NA	NA
on.gene.LG1.410	E001	NA	NA	NA	0.022136	NA	NA	NA	NA	NA	NA	NA	NA	NA	NA	NA
on.gene.LG1.410	E013	NA	0.004157	NA	NA	NA	NA	NA	NA	NA	NA	NA	0.0189574	NA	NA	NA
on.gene.LG1.413	E001	NA	NA	NA	NA	0.0491186	NA	NA	NA	NA	NA	NA	0.0147749	NA	NA	NA
on.gene.LG1.413	E002	NA	NA	NA	NA	0.042033	NA	NA	NA	NA	NA	NA	0.0279716	NA	NA	NA
on.gene.LG1.413	E003	NA	0.0207949	NA	NA	NA	NA	NA	0.0178812	NA	NA	NA	0.0293007	NA	NA	NA
on.gene.LG1.413	E004	NA	NA	NA	0.0342826	NA	NA	NA	NA	NA	NA	NA	NA	NA	NA	NA
on.gene.LG1.413	E012	NA	NA	NA	NA	NA	NA	NA	NA	NA	NA	0.0448388	NA	NA	NA	NA
on.gene.LG1.413	E014	NA	NA	NA	0.0184772	NA	NA	NA	NA	NA	NA	NA	NA	NA	NA	NA
on.gene.LG1.413	E015	NA	NA	NA	0.0116345	NA	NA	NA	NA	NA	NA	0.0146421	NA	NA	NA	NA
on.gene.LG1.413	E019	NA	NA	NA	NA	0.0245519	NA	NA	NA	NA	NA	NA	0.00327666	NA	NA	NA
on.gene.LG1.415	E007	NA	NA	NA	NA	NA	NA	NA	NA	NA	NA	NA	NA	NA	NA	0.0479901
on.gene.LG1.417	E027	NA	NA	NA	NA	NA	NA	NA	NA	NA	NA	0.0444954	NA	NA	NA	NA
on.gene.LG1.418	E013	NA	NA	NA	0.0422176	0.0349797	NA	NA	NA	NA	NA	NA	NA	NA	NA	NA
on.gene.LG1.419	E001	NA	0.000705815	0.0391231	NA	0.0234874	NA	0.0216757	NA	NA	NA	NA	NA	NA	NA	0.0128765
on.gene.LG1.419	E002	NA	0.00896955	NA	NA	NA	NA	NA	NA	NA	NA	0.000133039	NA	NA	NA	0.0435932
on.gene.LG1.419	E003	NA	NA	NA	0.0435419	NA	NA	NA	NA	NA	NA	0.0203147	NA	NA	NA	NA
on.gene.LG1.419	E009	NA	NA	NA	NA	NA	NA	NA	NA	NA	0.0329535	NA	0.000665767	NA	NA	NA
on.gene.LG1.419	E010	NA	0.00932443	NA	0.0219175	NA	NA	NA	NA	NA	NA	NA	NA	NA	NA	0.0440455
on.gene.LG1.419	E012	NA	0.0022989	NA	0.00925706	NA	NA	NA	NA	NA	NA	0.00101393	NA	NA	NA	0.0282048
on.gene.LG1.419	E014	NA	0.00313804	NA	NA	NA	NA	NA	NA	NA	NA	NA	NA	NA	NA	0.00806218
on.gene.LG1.419	E015	NA	NA	NA	0.000145039	NA	NA	NA	NA	NA	NA	0.00361185	NA	NA	NA	0.0264824
on.gene.LG1.42	E002	NA	NA	NA	0.00447996	0.022104	NA	NA	NA	NA	NA	0.000684048	0.00565528	NA	NA	NA
on.gene.LG1.42	E003	NA	NA	NA	NA	NA	NA	NA	NA	NA	NA	0.0456963	NA	NA	NA	NA
on.gene.LG1.42	E009	NA	NA	NA	NA	NA	NA	NA	NA	NA	NA	NA	0.0465244	NA	NA	NA
on.gene.LG1.42	E017	NA	NA	NA	0.00125498	NA	NA	NA	NA	NA	NA	0.00113952	NA	NA	NA	NA
on.gene.LG1.42	E018	NA	NA	NA	0.0040076	NA	NA	NA	NA	NA	NA	NA	NA	NA	NA	NA
on.gene.LG1.42	E019	NA	NA	NA	NA	NA	NA	NA	NA	NA	NA	0.0235652	NA	NA	NA	NA
on.gene.LG1.42	E020	NA	NA	0.00362672	NA	0.0425889	NA	NA	NA	NA	0.00134941	NA	0.0218151	NA	NA	NA
on.gene.LG1.42	E022	NA	NA	NA	NA	NA	NA	NA	NA	NA	NA	NA	0.0431501	NA	NA	NA
on.gene.LG1.422	E002	NA	NA	0.0222165	NA	NA	NA	NA	NA	NA	NA	NA	NA	NA	NA	NA
on.gene.LG1.424	E001	NA	NA	NA	NA	NA	NA	NA	NA	NA	NA	0.00849649	NA	NA	NA	NA
on.gene.LG1.424	E002	NA	NA	NA	NA	NA	NA	NA	NA	NA	NA	0.00841447	NA	NA	NA	NA
on.gene.LG1.4240001	E002	NA	NA	NA	NA	0.00712828	NA	NA	NA	NA	NA	NA	0.0295848	NA	NA	NA
on.gene.LG1.4240001	E003	NA	NA	0.00925663	0.00864326	NA	NA	0.0241192	NA	NA	0.0171605	0.00829408	NA	0.0235792	NA	NA
on.gene.LG1.4240001	E004	NA	NA	NA	NA	0.0165377	NA	NA	NA	NA	NA	NA	0.0171559	NA	NA	NA
on.gene.LG1.4240001	E006	NA	NA	NA	NA	0.00672929	NA	0.0296471	NA	NA	NA	NA	0.00124436	0.0108476	NA	NA
on.gene.LG1.4240001	E007	NA	NA	NA	NA	NA	NA	NA	NA	NA	NA	NA	0.0367851	NA	NA	NA
on.gene.LG1.4240001	E012	NA	NA	NA	NA	0.0318033	NA	NA	NA	NA	NA	NA	0.00424989	NA	NA	NA
on.gene.LG1.425	E001	NA	NA	NA	NA	0.00091705	NA	NA	0.0328996	0.027621	NA	NA	0.012686	NA	NA	NA
on.gene.LG1.425	E003	NA	NA	NA	NA	NA	NA	NA	NA	NA	NA	0.0139023	NA	NA	NA	NA
on.gene.LG1.425	E004	NA	0.00234479	NA	NA	0.00065081	NA	NA	0.00428208	0.00559446	NA	NA	NA	NA	NA	NA
on.gene.LG1.426	E001	NA	NA	NA	NA	NA	NA	NA	NA	NA	NA	0.0489893	0.0471929	NA	NA	NA
on.gene.LG1.428	E001	NA	NA	NA	0.00138282	NA	NA	NA	0.0226324	0.000679182	NA	NA	0.00465173	NA	NA	0.0157556
on.gene.LG1.428	E002	NA	NA	NA	0.00140637	NA	NA	NA	0.0227328	0.000691921	NA	NA	0.00471284	NA	NA	0.0159644
on.gene.LG1.429	E001	0.00246172	0.00851916	NA	NA	NA	NA	NA	NA	NA	NA	0.010308	NA	NA	NA	0.000620556
on.gene.LG1.429	E002	NA	NA	NA	0.0261553	NA	NA	NA	NA	NA	NA	0.00395653	NA	NA	NA	0.0121012
on.gene.LG1.429	E003	NA	NA	NA	NA	NA	NA	NA	NA	NA	0.000685001	0.027607	NA	0.00109315	NA	NA
on.gene.LG1.429	E005	NA	NA	NA	0.0134432	0.029673	NA	NA	NA	0.0444832	NA	0.00136196	0.00368499	NA	NA	0.016454
on.gene.LG1.429	E006	NA	NA	0.0127942	NA	0.027693	NA	NA	NA	NA	0.00126815	NA	0.00140269	0.0131387	NA	NA
on.gene.LG1.43	E001	NA	NA	NA	NA	0.00345047	NA	NA	0.0302785	NA	NA	NA	0.000773589	NA	NA	0.0289685
on.gene.LG1.43	E002	NA	0.00527246	NA	NA	NA	NA	NA	NA	NA	NA	NA	NA	NA	NA	NA
on.gene.LG1.43	E008	NA	NA	NA	NA	0.0155319	NA	NA	NA	NA	NA	NA	NA	NA	NA	NA
on.gene.LG1.43	E009	NA	0.00313819	NA	NA	0.0132658	NA	NA	NA	NA	NA	NA	0.00247083	NA	NA	NA
on.gene.LG1.43	E010	NA	0.0305761	NA	NA	NA	NA	NA	NA	NA	NA	NA	NA	NA	NA	NA
on.gene.LG1.431	E009	NA	NA	NA	0.00957404	NA	NA	NA	NA	NA	NA	NA	NA	NA	NA	NA
on.gene.LG1.432	E003	NA	NA	NA	NA	NA	NA	NA	NA	NA	NA	0.0402253	NA	NA	NA	NA
on.gene.LG1.434	E001	0.00331124	NA	NA	NA	NA	NA	NA	NA	NA	NA	0.0027255	NA	NA	NA	0.0054239
on.gene.LG1.434	E002	0.000402585	NA	NA	0.0449729	NA	NA	NA	NA	NA	NA	NA	NA	NA	NA	0.000629905
on.gene.LG1.434	E003	NA	NA	NA	NA	NA	0.00184073	NA	NA	0.000768459	0.0236729	0.000104509	NA	NA	0.0125236	NA
on.gene.LG1.434	E004	NA	NA	0.0151284	NA	NA	0.0437521	NA	0.0014376	NA	NA	NA	0.0175927	0.00015069	NA	NA
on.gene.LG1.434	E005	NA	NA	0.00150851	NA	NA	NA	NA	NA	NA	0.00762305	NA	NA	0.000244254	NA	0.0152409
on.gene.LG1.434	E006	0.0328642	NA	NA	0.0265405	NA	NA	NA	NA	NA	NA	0.006802	NA	NA	NA	0.000131229
on.gene.LG1.434	E007	NA	NA	0.00663091	NA	NA	NA	NA	NA	NA	0.0046697	NA	NA	NA	NA	0.0287662
on.gene.LG1.437	E003	NA	NA	NA	NA	NA	NA	NA	NA	NA	NA	NA	0.00779367	0.0375488	NA	NA
on.gene.LG1.437	E006	NA	NA	NA	NA	0.0491106	NA	NA	NA	NA	NA	NA	NA	NA	NA	NA
on.gene.LG1.437	E012	NA	NA	NA	NA	NA	NA	NA	0.0279956	NA	NA	NA	0.0484971	NA	NA	NA
on.gene.LG1.440	E001	NA	0.0265088	NA	0.017149	NA	NA	NA	NA	NA	NA	0.000182595	NA	NA	NA	NA
on.gene.LG1.440	E014	NA	NA	NA	NA	0.024249	NA	NA	NA	NA	NA	NA	NA	NA	NA	NA
on.gene.LG1.441	E002	NA	NA	NA	NA	NA	NA	NA	NA	0.0353876	NA	NA	NA	0.000739668	NA	0.00229479
on.gene.LG1.441	E003	NA	NA	NA	NA	NA	NA	NA	NA	NA	NA	NA	NA	0.0137739	NA	NA
on.gene.LG1.441	E004	NA	NA	NA	NA	NA	NA	NA	NA	NA	NA	NA	0.0441735	0.0152355	NA	NA
on.gene.LG1.441	E005	NA	NA	NA	NA	NA	NA	NA	NA	NA	NA	0.0360687	0.00145254	0.000456738	NA	NA
on.gene.LG1.441	E006	NA	NA	NA	NA	0.0300025	NA	NA	NA	NA	NA	NA	0.00108266	0.00123346	NA	NA
on.gene.LG1.441	E007	NA	NA	NA	NA	NA	NA	NA	NA	NA	NA	NA	NA	0.0234762	NA	NA
on.gene.LG1.441	E008	NA	NA	NA	NA	NA	NA	NA	NA	NA	NA	NA	NA	0.0248677	NA	NA
on.gene.LG1.441	E009	NA	NA	NA	NA	NA	NA	NA	NA	NA	NA	NA	NA	0.0249719	NA	NA
on.gene.LG1.441	E014	NA	NA	NA	NA	NA	NA	NA	NA	NA	NA	NA	NA	0.0166121	NA	NA
on.gene.LG1.441	E015	NA	NA	NA	NA	NA	NA	NA	NA	NA	NA	NA	0.0397316	NA	NA	NA
on.gene.LG1.441	E018	NA	NA	NA	NA	NA	NA	NA	NA	NA	NA	0.0307461	NA	NA	NA	NA
on.gene.LG1.441	E024	NA	NA	NA	NA	NA	NA	NA	NA	NA	NA	0.00279775	NA	NA	NA	NA
on.gene.LG1.441	E033	NA	NA	NA	NA	NA	NA	NA	NA	NA	NA	0.0125414	0.00159562	0.000103936	NA	NA
on.gene.LG1.441	E035	NA	NA	NA	NA	NA	NA	0.0150219	NA	NA	0.0311771	NA	NA	NA	NA	0.039539
on.gene.LG1.441	E036	NA	NA	NA	NA	NA	NA	NA	NA	NA	NA	NA	NA	0.0192917	NA	NA
on.gene.LG1.443	E001	NA	NA	0.00665608	0.000136914	0.0020879	NA	NA	NA	NA	0.00746854	NA	0.000965142	NA	NA	NA
on.gene.LG1.443	E002	NA	NA	NA	NA	NA	NA	NA	NA	NA	NA	0.00547854	NA	0.034567	NA	NA
on.gene.LG1.443	E007	NA	NA	NA	NA	NA	NA	NA	NA	NA	NA	0.0366849	NA	NA	NA	NA
on.gene.LG1.445	E006	NA	NA	NA	NA	0.0379734	NA	NA	NA	NA	NA	NA	0.00105699	NA	NA	NA
on.gene.LG1.445	E007	NA	NA	NA	0.0104505	0.00889214	NA	NA	NA	NA	NA	0.000465167	0.000363976	NA	NA	NA
on.gene.LG1.445	E008	0.0427037	0.0245149	NA	NA	NA	NA	NA	NA	NA	NA	NA	NA	NA	NA	0.00371869
on.gene.LG1.445	E009	NA	NA	NA	NA	NA	NA	0.042111	NA	NA	NA	NA	NA	0.0320873	NA	NA
on.gene.LG1.445	E011	NA	NA	NA	0.0335596	NA	NA	NA	NA	NA	NA	NA	NA	NA	NA	NA
on.gene.LG1.445	E012	NA	NA	0.00304758	NA	NA	NA	0.000278165	NA	NA	0.00876594	NA	0.000168011	0.000422322	NA	NA
on.gene.LG1.445	E013	NA	NA	NA	NA	NA	NA	NA	NA	NA	NA	0.0404874	NA	NA	NA	NA
on.gene.LG1.445	E014	NA	NA	0.0119192	NA	NA	NA	0.00036819	NA	NA	0.00792418	NA	NA	NA	NA	NA
on.gene.LG1.445	E015	NA	0.0265537	0.00334844	NA	0.000820614	NA	0.000346961	NA	NA	0.00739987	NA	0.00110342	0.000388772	NA	0.0143628
on.gene.LG1.448	E001	NA	NA	NA	NA	NA	NA	NA	NA	NA	NA	NA	NA	0.00384164	NA	NA
on.gene.LG1.448	E007	NA	NA	NA	NA	0.046595	NA	NA	NA	NA	NA	NA	0.0084957	NA	NA	NA
on.gene.LG1.448	E008	NA	NA	NA	NA	0.0363464	NA	NA	NA	NA	0.0234587	NA	0.00167139	NA	NA	NA
on.gene.LG1.448	E009	NA	NA	NA	NA	NA	NA	NA	NA	NA	NA	NA	0.00302507	0.00409645	NA	NA
on.gene.LG1.448	E011	NA	NA	NA	NA	NA	NA	NA	NA	NA	NA	NA	0.0329378	NA	NA	NA
on.gene.LG1.448	E012	NA	NA	NA	NA	NA	NA	NA	NA	NA	NA	NA	0.0352578	NA	NA	NA
on.gene.LG1.448	E017	NA	NA	NA	NA	NA	NA	0.0362638	NA	NA	NA	NA	NA	NA	NA	NA
on.gene.LG1.448	E027	NA	NA	NA	NA	NA	NA	NA	NA	NA	NA	0.0225558	NA	NA	NA	NA
on.gene.LG1.448	E028	NA	NA	0.0388526	0.00619299	NA	NA	NA	NA	NA	NA	NA	0.001763	0.00326216	NA	NA
on.gene.LG1.448	E038	NA	NA	NA	NA	NA	NA	NA	NA	NA	NA	NA	0.00653508	NA	NA	NA
on.gene.LG1.448	E040	NA	NA	NA	NA	NA	NA	NA	NA	NA	NA	NA	0.0468536	NA	NA	NA
on.gene.LG1.448	E041	NA	NA	NA	NA	NA	NA	NA	NA	NA	NA	NA	NA	0.0435424	NA	NA
on.gene.LG1.448	E042	NA	NA	NA	NA	NA	NA	NA	NA	NA	NA	NA	0.0231845	0.0370746	NA	NA
on.gene.LG1.448	E045	NA	NA	NA	NA	NA	NA	NA	NA	NA	NA	NA	0.0133011	0.0171495	NA	NA
on.gene.LG1.448	E046	NA	NA	NA	NA	NA	NA	NA	NA	NA	NA	NA	NA	0.0482474	NA	NA
on.gene.LG1.449	E001	NA	0.0171518	NA	0.0216583	NA	NA	NA	NA	NA	NA	0.0389467	NA	NA	NA	NA
on.gene.LG1.449	E004	NA	NA	0.035738	NA	NA	NA	NA	NA	NA	NA	NA	NA	NA	NA	NA
on.gene.LG1.45	E009	NA	NA	NA	0.00292167	0.014303	0.0233183	0.0374536	NA	NA	NA	NA	NA	NA	NA	NA
on.gene.LG1.450	E001	NA	0.000506436	NA	NA	NA	NA	NA	NA	NA	NA	NA	0.0105449	NA	NA	NA
on.gene.LG1.450	E003	NA	NA	NA	0.00234069	NA	NA	NA	NA	NA	NA	0.00178597	NA	NA	NA	0.0301873
on.gene.LG1.450	E005	NA	NA	NA	NA	NA	NA	NA	NA	NA	NA	0.000283702	NA	NA	NA	NA
on.gene.LG1.450	E006	NA	NA	NA	NA	NA	NA	NA	NA	NA	NA	0.0419109	NA	NA	NA	NA
on.gene.LG1.450	E009	0.00710834	0.00539071	NA	0.0193537	NA	NA	NA	NA	NA	NA	0.00218367	NA	NA	NA	NA
on.gene.LG1.450	E012	NA	NA	NA	0.00262961	NA	NA	NA	NA	NA	NA	0.00527878	NA	NA	NA	NA
on.gene.LG1.451	E005	NA	NA	NA	NA	NA	NA	NA	NA	NA	NA	NA	0.0322773	NA	NA	NA
on.gene.LG1.451	E008	NA	NA	NA	0.00739255	NA	NA	NA	NA	NA	NA	NA	NA	NA	NA	NA
on.gene.LG1.451	E013	NA	NA	NA	NA	NA	NA	NA	NA	NA	NA	0.0029499	0.0301527	0.00422615	NA	NA
on.gene.LG1.451	E019	NA	NA	0.0293369	0.00251639	NA	NA	0.0139683	NA	NA	NA	0.0317439	NA	NA	NA	NA
on.gene.LG1.451	E020	NA	NA	0.00364865	0.00257669	0.0382819	NA	0.000638936	NA	NA	NA	0.0326297	NA	0.00759917	NA	NA
on.gene.LG1.46	E001	NA	NA	NA	NA	0.0115257	NA	NA	NA	NA	NA	NA	0.0201532	NA	NA	NA
on.gene.LG1.46	E004	NA	NA	NA	NA	0.0291082	NA	NA	NA	NA	NA	NA	NA	NA	NA	NA
on.gene.LG1.46	E009	NA	NA	NA	NA	NA	NA	NA	0.0433502	NA	NA	NA	0.00499341	NA	NA	NA
on.gene.LG1.46	E010	NA	NA	NA	NA	NA	NA	NA	NA	NA	NA	NA	0.0192471	NA	NA	NA
on.gene.LG1.460	E001	NA	NA	NA	NA	NA	NA	NA	NA	NA	0.0212679	NA	0.000372225	NA	NA	NA
on.gene.LG1.460	E002	NA	0.0288401	NA	NA	NA	NA	NA	NA	NA	NA	NA	0.0132408	NA	NA	NA
on.gene.LG1.460	E003	0.0298388	0.000760178	NA	0.0341529	NA	NA	NA	NA	NA	NA	NA	0.0191813	NA	NA	NA
on.gene.LG1.460	E006	0.00110687	0.0199503	NA	NA	NA	NA	NA	NA	NA	0.0067972	NA	NA	NA	NA	NA
on.gene.LG1.460	E007	0.000101432	NA	NA	NA	NA	NA	NA	NA	NA	NA	NA	NA	0.00012775	NA	0.00193353
on.gene.LG1.460	E008	0.00280521	NA	NA	NA	0.0031508	NA	0.0474735	NA	NA	0.000106287	NA	NA	NA	NA	NA
on.gene.LG1.460	E009	NA	0.00318422	NA	NA	NA	NA	NA	NA	NA	NA	NA	NA	0.0112227	NA	NA
on.gene.LG1.460	E010	NA	NA	NA	NA	NA	NA	NA	NA	NA	NA	NA	NA	0.00243795	NA	0.0184147
on.gene.LG1.460	E011	NA	NA	NA	0.0397419	NA	NA	NA	NA	NA	NA	NA	0.00229577	NA	NA	0.0272439
on.gene.LG1.460	E012	NA	0.00308438	NA	NA	NA	NA	NA	NA	NA	NA	NA	0.0120535	NA	NA	NA
on.gene.LG1.460	E013	NA	NA	NA	NA	NA	NA	NA	NA	0.0159006	NA	NA	NA	0.0161526	NA	0.0211886
on.gene.LG1.460	E014	NA	0.0292111	NA	NA	NA	NA	NA	NA	NA	NA	NA	NA	NA	NA	NA
on.gene.LG1.460	E015	0.0165252	0.00338912	NA	NA	NA	NA	NA	NA	NA	0.0395236	NA	0.0224919	NA	NA	0.0448333
on.gene.LG1.460	E016	0.0419072	0.0435241	NA	NA	NA	NA	NA	NA	NA	0.0436157	NA	NA	0.00827639	NA	0.00547191
on.gene.LG1.460	E017	NA	NA	NA	NA	NA	NA	NA	NA	NA	0.0485532	NA	0.00179514	NA	NA	NA
on.gene.LG1.460	E018	NA	NA	NA	NA	NA	NA	NA	NA	NA	0.0342927	NA	0.0012247	NA	NA	NA
on.gene.LG1.460	E019	NA	NA	NA	NA	NA	NA	NA	NA	NA	0.040202	NA	0.0219193	NA	NA	NA
on.gene.LG1.460	E020	NA	0.037261	NA	NA	NA	NA	NA	NA	NA	0.0353791	NA	NA	0.00816526	NA	NA
on.gene.LG1.460	E021	NA	0.00100307	NA	NA	NA	NA	NA	NA	NA	0.0277713	NA	NA	0.000623297	NA	NA
on.gene.LG1.460	E022	NA	0.0117942	NA	NA	0.0223375	NA	NA	NA	NA	0.00765768	NA	NA	0.006396	NA	NA
on.gene.LG1.460	E023	NA	NA	NA	NA	NA	NA	NA	NA	NA	0.0054713	NA	0.00222861	NA	NA	NA
on.gene.LG1.460	E028	NA	NA	NA	NA	NA	NA	NA	NA	NA	NA	NA	0.00893095	NA	NA	NA
on.gene.LG1.460	E029	NA	0.00465409	NA	NA	0.0394773	NA	NA	0.0347039	NA	NA	NA	NA	0.014998	NA	NA
on.gene.LG1.460	E030	NA	0.0034501	NA	NA	0.0352773	NA	0.0454657	NA	NA	NA	NA	NA	NA	NA	0.00746788
on.gene.LG1.460	E031	NA	0.00218577	NA	NA	NA	NA	NA	NA	NA	NA	NA	NA	0.00610662	NA	NA
on.gene.LG1.460	E033	NA	0.0444101	NA	NA	0.0101294	NA	NA	NA	NA	NA	NA	0.00296348	NA	NA	NA
on.gene.LG1.460	E034	NA	0.0220086	NA	NA	0.0291108	NA	NA	NA	NA	NA	NA	NA	0.0424958	NA	NA
on.gene.LG1.460	E035	NA	0.000454612	NA	NA	0.0255842	NA	NA	NA	NA	NA	NA	0.00145788	NA	NA	NA
on.gene.LG1.460	E036	NA	0.000284623	NA	NA	0.00416428	NA	NA	NA	NA	NA	NA	0.00157003	NA	NA	NA
on.gene.LG1.460	E037	NA	0.000269202	NA	NA	0.00493743	NA	NA	NA	NA	NA	NA	NA	NA	NA	NA
on.gene.LG1.460	E038	NA	0.0339661	NA	NA	NA	NA	NA	NA	NA	NA	NA	0.00237009	NA	NA	NA
on.gene.LG1.460	E039	NA	NA	NA	NA	NA	NA	NA	NA	NA	NA	NA	0.0411633	0.00685384	NA	NA
on.gene.LG1.460	E040	NA	NA	NA	NA	NA	NA	NA	NA	NA	NA	NA	NA	0.00985963	NA	NA
on.gene.LG1.460	E041	NA	NA	NA	NA	NA	NA	NA	NA	NA	0.033596	NA	0.000366263	0.0017521	NA	NA
on.gene.LG1.460	E042	NA	NA	NA	NA	NA	NA	NA	NA	NA	NA	NA	0.00578678	0.0193744	NA	NA
on.gene.LG1.460	E045	NA	0.000470343	NA	NA	0.0456176	NA	NA	NA	NA	NA	NA	0.000874	NA	NA	NA
on.gene.LG1.460	E048	NA	0.00650576	NA	NA	NA	NA	NA	NA	NA	NA	0.0462342	NA	NA	NA	NA
on.gene.LG1.460	E049	0.0114282	0.033736	NA	NA	NA	NA	NA	NA	NA	NA	0.0008632	NA	NA	NA	NA
on.gene.LG1.461	E010	NA	NA	NA	NA	NA	NA	NA	NA	NA	0.0336295	NA	NA	NA	NA	NA
on.gene.LG1.462	E001	NA	NA	NA	NA	NA	NA	NA	NA	NA	NA	0.0330375	NA	NA	NA	NA
on.gene.LG1.463	E013	NA	NA	NA	NA	NA	NA	NA	NA	NA	NA	0.025002	NA	NA	NA	NA
on.gene.LG1.464	E018	NA	NA	NA	NA	0.0322109	NA	NA	0.00107026	NA	0.0114691	NA	NA	NA	NA	NA
on.gene.LG1.465	E092	NA	NA	NA	NA	NA	NA	NA	NA	NA	NA	0.0194332	NA	NA	NA	NA
on.gene.LG1.47	E001	NA	NA	NA	0.047706	NA	NA	NA	NA	NA	NA	NA	NA	NA	NA	NA
on.gene.LG1.471	E001	NA	NA	NA	NA	NA	NA	NA	NA	NA	NA	0.0208866	NA	NA	NA	NA
on.gene.LG1.471	E006	NA	NA	NA	NA	NA	NA	NA	NA	NA	NA	NA	NA	0.0274636	NA	NA
on.gene.LG1.471	E007	NA	NA	NA	NA	NA	NA	0.00240294	NA	NA	NA	NA	NA	NA	NA	NA
on.gene.LG1.471	E012	NA	0.0205244	NA	NA	NA	NA	NA	0.0170593	NA	NA	NA	NA	NA	NA	NA
on.gene.LG1.471	E015	NA	NA	NA	NA	NA	NA	NA	NA	NA	NA	0.0400534	NA	NA	NA	NA
on.gene.LG1.471	E021	NA	NA	0.00959482	0.0339878	NA	NA	NA	NA	NA	0.0265093	NA	NA	NA	NA	NA
on.gene.LG1.471	E024	NA	NA	NA	NA	0.00732178	NA	NA	NA	NA	NA	NA	0.002808	NA	NA	NA
on.gene.LG1.471	E025	NA	NA	NA	NA	0.0467079	NA	NA	NA	NA	NA	NA	0.00027013	0.00196293	NA	NA
on.gene.LG1.476	E001	NA	NA	NA	NA	NA	NA	NA	NA	NA	NA	0.0113475	NA	NA	NA	NA
on.gene.LG1.477	E001	NA	NA	0.0227961	NA	NA	NA	NA	NA	NA	NA	NA	NA	NA	NA	NA
on.gene.LG1.477	E004	NA	NA	NA	0.00243345	NA	NA	NA	NA	NA	NA	NA	0.00204968	NA	NA	NA
on.gene.LG1.477	E005	NA	NA	NA	NA	NA	NA	NA	NA	NA	NA	NA	0.000461182	NA	NA	NA
on.gene.LG1.478	E001	NA	NA	NA	NA	0.000211113	NA	NA	0.00352516	NA	NA	NA	NA	NA	NA	NA
on.gene.LG1.478	E006	NA	0.02055	NA	NA	0.000285271	NA	NA	0.00190862	NA	NA	NA	0.000271393	NA	NA	NA
on.gene.LG1.478	E008	NA	NA	NA	NA	NA	NA	NA	NA	NA	NA	NA	0.00674284	NA	NA	NA
on.gene.LG1.478	E012	NA	NA	0.0103138	NA	0.043102	NA	NA	NA	NA	NA	NA	NA	NA	NA	NA
on.gene.LG1.478	E013	NA	NA	0.0125888	NA	0.0479856	NA	NA	NA	NA	NA	NA	NA	NA	NA	NA
on.gene.LG1.478	E015	NA	NA	NA	NA	NA	NA	NA	NA	NA	NA	NA	0.0344097	0.00351748	NA	NA
on.gene.LG1.478	E017	NA	NA	NA	NA	NA	NA	NA	NA	NA	NA	NA	NA	0.00697603	NA	NA
on.gene.LG1.478	E018	NA	NA	NA	NA	NA	NA	NA	NA	NA	NA	NA	NA	0.00862167	0.0338435	NA
on.gene.LG1.478	E024	NA	NA	NA	NA	NA	NA	NA	NA	NA	NA	0.00979544	NA	0.00110794	NA	NA
on.gene.LG1.478	E029	NA	NA	NA	NA	NA	NA	NA	NA	NA	NA	NA	NA	0.0169726	NA	NA
on.gene.LG1.478	E030	NA	NA	NA	NA	NA	NA	NA	NA	NA	NA	NA	0.0426165	0.0163435	NA	NA
on.gene.LG1.482	E006	NA	NA	NA	NA	NA	NA	NA	NA	NA	0.0253791	NA	0.00194272	NA	NA	NA
on.gene.LG1.483	E010	NA	NA	NA	NA	NA	NA	NA	NA	NA	NA	NA	0.00810463	NA	NA	NA
on.gene.LG1.485	E001	NA	0.00701569	NA	NA	0.0151997	NA	NA	NA	NA	NA	NA	0.000411596	NA	NA	NA
on.gene.LG1.485	E011	NA	NA	NA	NA	NA	NA	NA	NA	NA	NA	NA	NA	0.0180533	NA	0.0101237
on.gene.LG1.4860001	E002	NA	NA	NA	NA	NA	NA	NA	NA	NA	NA	0.00389035	NA	NA	NA	NA
on.gene.LG1.4860001	E004	NA	NA	NA	NA	NA	NA	NA	NA	NA	NA	0.000358995	0.0443529	NA	NA	NA
on.gene.LG1.487	E001	NA	NA	NA	NA	NA	NA	NA	NA	NA	0.00414819	NA	NA	NA	NA	NA
on.gene.LG1.487	E005	NA	NA	0.021232	NA	0.00467588	NA	0.0399145	NA	NA	NA	0.000307478	0.0406883	NA	NA	NA
on.gene.LG1.487	E013	NA	NA	NA	NA	NA	NA	NA	NA	NA	NA	0.0378932	NA	NA	NA	NA
on.gene.LG1.489	E009	NA	NA	NA	NA	NA	NA	NA	NA	NA	NA	NA	0.0164173	NA	NA	NA
on.gene.LG1.489	E010	NA	NA	NA	NA	NA	NA	NA	NA	NA	NA	0.0398923	NA	0.0315481	NA	NA
on.gene.LG1.489	E013	NA	NA	NA	0.0280421	NA	NA	NA	NA	NA	0.0162133	NA	0.0103987	0.00429066	NA	NA
on.gene.LG1.489	E016	NA	NA	NA	NA	NA	NA	NA	NA	NA	NA	NA	NA	0.00231486	NA	NA
on.gene.LG1.489	E017	NA	NA	NA	NA	NA	NA	NA	NA	NA	NA	0.0478895	NA	NA	NA	0.0399827
on.gene.LG1.489	E018	NA	NA	NA	0.0309899	NA	NA	NA	NA	NA	NA	NA	NA	NA	NA	NA
on.gene.LG1.490	E002	NA	NA	NA	NA	NA	NA	NA	NA	NA	NA	NA	0.0318465	NA	NA	NA
on.gene.LG1.490	E009	NA	NA	NA	NA	NA	NA	NA	NA	NA	NA	NA	0.0158572	NA	NA	NA
on.gene.LG1.492	E014	NA	NA	NA	NA	NA	NA	0.0277633	NA	NA	NA	NA	NA	0.0168656	NA	NA
on.gene.LG1.492	E025	NA	NA	NA	0.0328583	NA	NA	NA	NA	NA	NA	0.02445	NA	NA	NA	NA
on.gene.LG1.492	E027	NA	NA	NA	NA	NA	NA	NA	NA	NA	NA	NA	0.0203539	NA	NA	NA
on.gene.LG1.492	E028	NA	NA	NA	NA	0.0394884	NA	NA	NA	NA	NA	NA	0.0269681	NA	NA	NA
on.gene.LG1.492	E037	NA	NA	NA	NA	NA	NA	NA	NA	NA	0.0469383	NA	NA	NA	NA	NA
on.gene.LG1.492	E051	NA	NA	NA	NA	NA	NA	NA	NA	NA	NA	NA	0.00949732	NA	NA	NA
on.gene.LG1.492	E052	NA	NA	NA	NA	NA	NA	NA	NA	NA	NA	NA	0.033051	NA	NA	NA
on.gene.LG1.492	E053	NA	NA	NA	NA	NA	NA	NA	NA	NA	NA	NA	0.0362653	NA	NA	NA
on.gene.LG1.492	E056	NA	NA	NA	NA	NA	NA	NA	NA	NA	NA	0.0322847	NA	NA	NA	NA
on.gene.LG1.493	E003	NA	0.0234135	NA	0.0259567	NA	NA	NA	NA	NA	NA	NA	NA	NA	NA	0.0196741
on.gene.LG1.493	E004	NA	0.00148319	NA	NA	NA	NA	NA	NA	NA	NA	NA	NA	NA	NA	NA
on.gene.LG1.493	E009	NA	NA	NA	NA	NA	NA	NA	NA	NA	NA	NA	NA	NA	NA	0.0147553
on.gene.LG1.493	E014	NA	NA	NA	NA	NA	NA	NA	NA	NA	NA	NA	0.0456362	NA	NA	NA
on.gene.LG1.497	E015	NA	NA	NA	NA	0.0343448	NA	NA	NA	NA	NA	NA	0.0112277	NA	NA	NA
on.gene.LG1.499	E001	NA	NA	NA	NA	NA	NA	NA	NA	NA	NA	NA	0.0151963	NA	NA	NA
on.gene.LG1.499	E003	NA	NA	NA	NA	NA	NA	NA	NA	NA	NA	0.0128951	NA	NA	NA	NA
on.gene.LG1.499	E004	NA	NA	NA	0.0244275	0.0119827	NA	0.0238083	NA	NA	NA	0.012615	0.00356937	0.00976042	NA	NA
on.gene.LG1.499	E006	0.0240956	0.00189103	NA	NA	0.0222718	NA	0.00176664	NA	NA	NA	NA	0.0352495	0.00193975	NA	NA
on.gene.LG1.50	E002	NA	NA	NA	0.0260691	NA	NA	NA	NA	NA	NA	NA	NA	NA	NA	NA
on.gene.LG1.500	E003	NA	NA	NA	NA	NA	NA	NA	NA	NA	NA	NA	NA	NA	NA	0.0498852
on.gene.LG1.500	E004	NA	NA	NA	NA	NA	NA	NA	NA	NA	NA	NA	NA	0.00101484	NA	NA
on.gene.LG1.500	E006	NA	NA	NA	NA	NA	NA	NA	NA	NA	NA	NA	0.0419772	0.0410094	NA	NA
on.gene.LG1.500	E010	NA	NA	NA	NA	NA	NA	NA	NA	NA	NA	NA	0.0434554	NA	NA	NA
on.gene.LG1.500	E013	NA	NA	NA	0.019137	NA	NA	0.032565	NA	NA	0.00826678	NA	0.000757495	0.000134844	NA	NA
on.gene.LG1.5000002	E001	NA	NA	NA	NA	0.000621075	NA	NA	NA	NA	NA	NA	0.000143112	0.0187181	NA	NA
on.gene.LG1.503	E001	0.000363015	NA	NA	0.00143508	NA	NA	NA	NA	NA	NA	0.000666902	NA	NA	NA	NA
on.gene.LG1.503	E002	0.042772	0.000660315	NA	0.00033089	NA	NA	NA	NA	NA	NA	0.000427051	NA	NA	NA	NA
on.gene.LG1.503	E003	NA	0.000248467	NA	NA	NA	NA	NA	NA	NA	NA	NA	NA	NA	NA	0.000152627
on.gene.LG1.503	E004	NA	NA	NA	0.00680207	NA	NA	NA	NA	NA	NA	NA	NA	NA	NA	NA
on.gene.LG1.503	E024	NA	0.0373382	NA	NA	NA	NA	NA	NA	NA	NA	NA	NA	NA	NA	NA
on.gene.LG1.503	E036	NA	NA	NA	NA	NA	NA	NA	NA	NA	NA	0.044715	NA	NA	NA	NA
on.gene.LG1.504	E001	NA	NA	0.0356845	NA	0.000938088	NA	0.00824375	NA	NA	0.00380731	NA	NA	0.000179609	NA	NA
on.gene.LG1.504	E002	NA	NA	0.0110635	NA	NA	NA	0.0100067	NA	NA	0.00662676	NA	NA	0.00239793	NA	NA
on.gene.LG1.504	E005	NA	NA	NA	NA	0.0351248	NA	NA	NA	NA	NA	NA	0.00087831	NA	NA	NA
on.gene.LG1.504	E006	NA	NA	NA	NA	0.00661433	NA	0.0326236	NA	NA	NA	NA	0.0018325	0.0126481	NA	NA
on.gene.LG1.504	E007	NA	NA	0.0260536	NA	0.00016189	NA	0.00721075	NA	NA	NA	NA	0.000274482	0.0121144	NA	NA
on.gene.LG1.505	E001	NA	NA	NA	NA	0.00636448	NA	NA	NA	NA	NA	0.0367635	0.00123156	NA	NA	NA
on.gene.LG1.505	E003	NA	NA	NA	NA	NA	NA	NA	NA	NA	NA	NA	0.0350782	NA	NA	NA
on.gene.LG1.506	E001	NA	0.0105583	NA	NA	NA	NA	NA	NA	NA	NA	NA	NA	NA	NA	NA
on.gene.LG1.506	E003	NA	NA	NA	NA	NA	NA	NA	NA	NA	0.0225672	NA	NA	NA	NA	NA
on.gene.LG1.507	E001	NA	NA	NA	NA	NA	NA	NA	NA	NA	0.00794213	NA	0.0239819	NA	NA	NA
on.gene.LG1.508	E016	NA	NA	NA	NA	NA	NA	NA	NA	NA	NA	NA	NA	0.026847	NA	NA
on.gene.LG1.513	E001	NA	NA	0.00321473	0.00229441	0.00113739	NA	NA	NA	NA	NA	NA	NA	NA	NA	NA
on.gene.LG1.513	E002	NA	NA	0.00587511	0.00577202	NA	NA	NA	NA	NA	NA	NA	0.00168327	0.000121475	NA	NA
on.gene.LG1.513	E003	NA	NA	NA	NA	NA	NA	NA	NA	NA	NA	0.0427021	NA	NA	NA	0.0450413
on.gene.LG1.513	E004	NA	0.0141349	NA	NA	NA	0.000143437	NA	0.038843	NA	0.00149345	0.00012168	NA	NA	NA	NA
on.gene.LG1.513	E005	NA	NA	0.00341693	0.0170073	NA	NA	0.00127347	NA	NA	0.000706813	0.00387141	NA	NA	NA	NA
on.gene.LG1.513	E006	NA	NA	NA	NA	0.00322577	NA	NA	NA	NA	NA	NA	NA	NA	NA	NA
on.gene.LG1.513	E007	NA	NA	0.0148142	0.0262872	NA	NA	0.000415949	NA	0.00277566	NA	NA	NA	0.00546963	NA	NA
on.gene.LG1.513	E008	NA	NA	NA	NA	NA	NA	NA	NA	NA	0.0364456	0.0026604	0.0248833	0.00194239	NA	NA
on.gene.LG1.513	E009	NA	NA	NA	NA	NA	NA	NA	NA	NA	NA	NA	0.00898327	0.00112461	NA	0.0304373
on.gene.LG1.513	E014	NA	NA	0.0179602	NA	NA	NA	NA	NA	NA	NA	NA	NA	NA	NA	NA
on.gene.LG1.513	E015	NA	NA	0.000375204	NA	0.0253897	NA	NA	NA	NA	NA	NA	NA	NA	NA	NA
on.gene.LG1.513	E016	NA	NA	0.00284619	NA	NA	0.025401	NA	NA	NA	NA	NA	NA	NA	NA	NA
on.gene.LG1.513	E018	NA	0.0199283	NA	NA	NA	NA	NA	NA	NA	NA	NA	0.000392866	NA	NA	NA
on.gene.LG1.513	E019	NA	NA	NA	NA	NA	NA	NA	NA	NA	0.00609791	0.0425115	0.000229529	NA	NA	NA
on.gene.LG1.513	E020	NA	0.000106695	NA	NA	0.00934559	NA	NA	0.0128856	NA	NA	NA	NA	NA	NA	NA
on.gene.LG1.513	E021	NA	NA	NA	NA	0.00133258	NA	NA	0.0284208	NA	0.0285325	NA	NA	NA	NA	NA
on.gene.LG1.514	E002	NA	NA	NA	NA	NA	NA	NA	NA	NA	NA	NA	NA	0.0210387	NA	NA
on.gene.LG1.514	E004	NA	NA	NA	NA	NA	NA	NA	NA	NA	NA	NA	NA	0.0301673	NA	NA
on.gene.LG1.514	E005	NA	NA	NA	NA	NA	NA	NA	NA	NA	NA	NA	0.00425943	0.0137548	NA	NA
on.gene.LG1.514	E012	NA	NA	NA	NA	NA	NA	NA	NA	NA	NA	NA	NA	0.0239602	0.0303786	NA
on.gene.LG1.514	E017	NA	NA	NA	NA	NA	NA	NA	NA	NA	NA	NA	NA	0.00587344	NA	NA
on.gene.LG1.514	E019	NA	NA	NA	NA	NA	NA	NA	NA	0.0303949	NA	NA	NA	NA	NA	NA
on.gene.LG1.514	E023	NA	NA	NA	NA	0.0314501	NA	NA	NA	NA	NA	NA	0.00568989	NA	NA	NA
on.gene.LG1.514	E028	NA	NA	NA	NA	NA	NA	NA	NA	NA	NA	NA	0.0130696	NA	NA	NA
on.gene.LG1.514	E029	NA	NA	NA	NA	0.00874456	NA	NA	NA	NA	NA	NA	0.0029409	NA	NA	NA
on.gene.LG1.514	E032	NA	NA	NA	NA	NA	NA	NA	NA	NA	0.000840822	NA	NA	NA	NA	NA
on.gene.LG1.514	E033	NA	NA	NA	NA	NA	NA	NA	NA	NA	0.0168408	NA	NA	NA	NA	NA
on.gene.LG1.514	E037	NA	NA	NA	NA	NA	NA	NA	NA	NA	0.0354294	NA	NA	NA	NA	NA
on.gene.LG1.514	E038	NA	NA	NA	NA	NA	NA	NA	NA	NA	0.0102941	NA	NA	NA	NA	NA
on.gene.LG1.514	E042	NA	NA	NA	NA	NA	NA	NA	0.044447	NA	NA	NA	NA	NA	NA	NA
on.gene.LG1.514	E043	NA	NA	NA	NA	NA	NA	NA	NA	NA	NA	NA	0.00676508	0.000356441	0.0279286	NA
on.gene.LG1.514	E044	NA	NA	NA	NA	NA	NA	0.0423297	NA	NA	NA	NA	0.0158782	0.000750957	NA	0.0119479
on.gene.LG1.514	E045	NA	NA	NA	NA	NA	NA	NA	NA	NA	NA	NA	0.04637	0.0373398	NA	NA
on.gene.LG1.514	E046	NA	NA	NA	NA	0.0344445	NA	NA	NA	NA	0.0379419	NA	0.00300869	NA	NA	NA
on.gene.LG1.514	E047	NA	NA	NA	NA	0.0119117	NA	0.0392116	NA	NA	NA	0.0163928	NA	NA	NA	NA
on.gene.LG1.514	E048	NA	NA	NA	NA	NA	NA	NA	NA	NA	0.0384753	0.0035129	NA	NA	NA	NA
on.gene.LG1.515	E001	NA	0.0135397	0.00541176	NA	0.0452447	NA	0.0295188	NA	NA	NA	NA	NA	NA	NA	0.0303762
on.gene.LG1.515	E003	NA	NA	0.000391111	NA	0.015467	NA	0.00119358	NA	NA	0.0197779	NA	NA	0.029074	NA	NA
on.gene.LG1.515	E004	NA	NA	0.000787651	NA	0.0131674	NA	0.0103352	NA	NA	0.0342279	0.000177358	NA	NA	NA	NA
on.gene.LG1.520	E001	NA	NA	NA	NA	NA	NA	NA	NA	NA	NA	0.0101869	NA	NA	NA	NA
on.gene.LG1.526	E001	NA	NA	NA	NA	NA	NA	NA	NA	NA	NA	NA	0.00836511	0.00379108	NA	NA
on.gene.LG1.526	E002	NA	NA	0.0433868	NA	NA	NA	0.00012187	NA	NA	0.00829012	0.0209194	NA	NA	NA	NA
on.gene.LG1.526	E003	NA	NA	0.0150453	NA	0.000381277	NA	0.00307172	NA	NA	0.0230493	NA	0.000306578	0.00228786	NA	NA
on.gene.LG1.526	E005	NA	NA	NA	0.0048897	NA	NA	NA	NA	NA	NA	NA	NA	0.0404799	NA	NA
on.gene.LG1.526	E007	NA	NA	NA	NA	0.0255745	NA	NA	NA	NA	NA	NA	0.00942482	0.0337679	NA	NA
on.gene.LG1.528	E001	NA	NA	NA	NA	0.00117894	NA	NA	NA	NA	NA	0.0235937	NA	NA	NA	NA
on.gene.LG1.528	E003	NA	NA	NA	0.00359695	NA	NA	NA	NA	NA	NA	0.000293213	NA	0.0437838	NA	NA
on.gene.LG1.528	E004	NA	NA	NA	NA	0.00133058	NA	NA	NA	NA	NA	NA	0.000151664	NA	NA	NA
on.gene.LG1.528	E005	NA	NA	NA	0.00695297	0.000255329	NA	NA	NA	NA	NA	NA	0.00731985	NA	NA	NA
on.gene.LG1.528	E006	NA	0.00915255	NA	NA	NA	NA	NA	0.00930566	0.0272887	NA	0.0231573	NA	0.0441957	NA	NA
on.gene.LG1.528	E007	NA	NA	NA	NA	NA	NA	NA	NA	NA	NA	NA	0.00191504	NA	NA	NA
on.gene.LG1.533	E001	NA	0.0153827	NA	NA	0.0201314	NA	NA	0.0191749	NA	NA	NA	NA	NA	NA	NA
on.gene.LG1.533	E004	NA	NA	NA	NA	NA	NA	NA	NA	NA	0.0152134	NA	NA	NA	NA	NA
on.gene.LG1.533	E005	NA	NA	NA	NA	NA	NA	NA	NA	NA	0.0290493	NA	0.0285625	NA	NA	NA
on.gene.LG1.533	E006	NA	NA	NA	NA	NA	NA	NA	NA	NA	0.0149976	NA	NA	NA	NA	NA
on.gene.LG1.533	E012	NA	NA	NA	NA	NA	NA	NA	NA	NA	NA	NA	0.0211469	0.0030077	NA	NA
on.gene.LG1.533	E013	NA	NA	NA	NA	NA	NA	NA	NA	NA	NA	NA	0.0262247	0.00411711	NA	NA
on.gene.LG1.540	E009	NA	0.0314383	0.00305549	NA	0.0193283	NA	0.015736	NA	NA	NA	NA	NA	NA	NA	NA
on.gene.LG1.540	E010	NA	NA	NA	NA	NA	NA	NA	NA	NA	NA	0.0445834	NA	NA	NA	NA
on.gene.LG1.540	E011	NA	NA	NA	NA	NA	NA	NA	NA	NA	NA	0.0243464	NA	NA	NA	NA
on.gene.LG1.540	E012	NA	0.0426301	0.00413799	NA	0.0330073	NA	0.0188165	NA	NA	0.000153045	NA	0.00195768	0.00077498	NA	NA
on.gene.LG1.541	E001	NA	NA	NA	NA	NA	NA	0.00583418	NA	NA	NA	0.00687211	0.00463607	NA	NA	NA
on.gene.LG1.541	E003	NA	NA	NA	NA	NA	NA	NA	NA	NA	NA	NA	0.0109343	NA	NA	NA
on.gene.LG1.541	E004	NA	NA	NA	NA	NA	NA	NA	NA	NA	NA	NA	NA	0.0249816	NA	NA
on.gene.LG1.541	E006	NA	NA	NA	NA	NA	NA	NA	NA	NA	NA	NA	0.00803288	NA	NA	NA
on.gene.LG1.541	E007	NA	NA	NA	NA	0.00174577	NA	NA	NA	0.0248302	NA	NA	0.00142925	NA	NA	NA
on.gene.LG1.541	E009	NA	NA	NA	NA	NA	0.0491776	NA	NA	NA	0.0177679	NA	NA	NA	NA	NA
on.gene.LG1.541	E010	NA	NA	NA	NA	NA	NA	NA	NA	NA	NA	0.025682	NA	NA	NA	0.0248502
on.gene.LG1.541	E011	NA	NA	NA	NA	NA	NA	NA	NA	NA	NA	0.000857824	NA	NA	NA	0.0391582
on.gene.LG1.541	E013	NA	NA	NA	NA	0.0418935	NA	0.0472565	NA	NA	NA	NA	NA	NA	NA	NA
on.gene.LG1.541	E015	NA	NA	NA	NA	NA	NA	NA	NA	NA	NA	NA	NA	0.026454	NA	NA
on.gene.LG1.541	E017	NA	NA	NA	NA	NA	NA	NA	NA	NA	NA	NA	NA	NA	NA	0.0251049
on.gene.LG1.541	E018	NA	NA	NA	NA	NA	NA	NA	NA	0.00777316	NA	NA	NA	NA	NA	0.0206119
on.gene.LG1.541	E019	NA	NA	NA	NA	NA	NA	NA	NA	NA	0.0115071	NA	0.00771702	NA	NA	NA
on.gene.LG1.546	E002	NA	NA	0.00833772	NA	0.0018447	NA	0.00468297	NA	NA	NA	NA	0.018852	0.0336222	NA	NA
on.gene.LG1.547	E004	NA	NA	NA	NA	NA	NA	NA	NA	NA	NA	0.00342386	0.000135114	0.00263745	NA	NA
on.gene.LG1.547	E011	NA	NA	NA	NA	NA	NA	NA	NA	NA	NA	NA	0.0363995	NA	NA	NA
on.gene.LG1.547	E016	NA	NA	NA	NA	NA	NA	NA	NA	NA	NA	NA	NA	0.0439314	NA	NA
on.gene.LG1.547	E018	NA	NA	NA	NA	NA	NA	NA	NA	NA	NA	0.00660167	NA	0.0215689	NA	NA
on.gene.LG1.547	E019	NA	NA	NA	NA	NA	NA	0.0290053	NA	NA	NA	0.00266434	0.0103532	0.00117488	NA	NA
on.gene.LG1.547	E020	NA	NA	NA	0.0103965	0.024225	NA	0.00279868	NA	NA	NA	0.0204655	0.0384771	0.0038162	NA	NA
on.gene.LG1.547	E021	NA	NA	NA	NA	NA	NA	NA	NA	NA	NA	0.00114986	0.00106241	0.00250884	NA	NA
on.gene.LG1.547	E022	NA	NA	NA	NA	NA	NA	NA	NA	NA	0.0127516	0.00161511	0.000185556	0.000861115	NA	NA
on.gene.LG1.547	E025	NA	NA	NA	NA	NA	NA	NA	NA	NA	NA	NA	NA	0.039711	NA	NA
on.gene.LG1.547	E026	NA	NA	NA	NA	NA	NA	NA	NA	0.0491017	NA	NA	NA	NA	NA	NA
on.gene.LG1.547	E027	NA	NA	NA	NA	NA	NA	NA	NA	NA	NA	NA	NA	0.0313783	NA	NA
on.gene.LG1.547	E028	NA	NA	NA	NA	NA	NA	NA	NA	NA	NA	NA	NA	0.0127791	NA	NA
on.gene.LG1.547	E029	NA	NA	NA	NA	NA	NA	NA	NA	NA	NA	NA	NA	0.00591681	NA	NA
on.gene.LG1.547	E030	NA	NA	NA	NA	NA	NA	NA	NA	NA	NA	NA	NA	0.0245775	NA	NA
on.gene.LG1.548	E001	NA	NA	NA	NA	NA	NA	NA	NA	NA	NA	NA	0.0083952	NA	NA	NA
on.gene.LG1.548	E003	NA	NA	NA	NA	NA	NA	NA	NA	NA	0.0371029	NA	0.0145022	NA	NA	NA
on.gene.LG1.548	E008	NA	NA	0.0497425	NA	NA	NA	NA	NA	NA	NA	NA	NA	NA	NA	NA
on.gene.LG1.548	E014	NA	NA	NA	0.009874	NA	NA	NA	NA	NA	NA	NA	NA	NA	NA	NA
on.gene.LG1.548	E015	NA	NA	NA	0.0374364	NA	NA	NA	NA	NA	NA	NA	NA	NA	NA	NA
on.gene.LG1.549	E001	NA	0.0253936	NA	NA	0.000702621	NA	NA	0.00196408	NA	NA	NA	0.000548166	NA	NA	NA
on.gene.LG1.549	E003	NA	NA	NA	NA	NA	NA	NA	NA	NA	NA	NA	0.0452766	NA	NA	NA
on.gene.LG1.549	E005	NA	NA	NA	NA	NA	NA	0.031512	NA	NA	NA	NA	NA	0.0268536	NA	NA
on.gene.LG1.549	E007	NA	NA	NA	0.000409131	NA	NA	0.00515207	NA	NA	NA	NA	NA	0.00078597	NA	NA
on.gene.LG1.549	E008	NA	0.0237562	NA	NA	NA	NA	NA	NA	NA	NA	NA	NA	NA	NA	NA
on.gene.LG1.549	E009	NA	NA	NA	0.015716	NA	NA	NA	NA	NA	0.043194	0.003885	NA	NA	NA	NA
on.gene.LG1.549	E011	NA	0.0358918	NA	NA	0.000439849	NA	NA	0.0410633	NA	NA	NA	0.000494537	NA	NA	NA
on.gene.LG1.549	E012	NA	0.019789	NA	0.0337684	NA	NA	0.000157772	NA	NA	NA	NA	NA	0.000418921	NA	NA
on.gene.LG1.549	E013	NA	NA	NA	NA	0.0137478	NA	NA	NA	NA	NA	NA	0.00238432	0.0176095	NA	NA
on.gene.LG1.55	E001	NA	NA	NA	NA	NA	NA	NA	NA	NA	NA	0.011322	NA	NA	NA	NA
on.gene.LG1.55	E002	NA	NA	NA	NA	NA	NA	NA	NA	NA	NA	0.0218783	NA	NA	NA	NA
on.gene.LG1.55	E008	NA	0.0393236	NA	NA	NA	NA	NA	NA	NA	NA	NA	NA	NA	NA	NA
on.gene.LG1.55	E009	NA	0.00928546	NA	NA	NA	NA	NA	NA	NA	NA	NA	NA	NA	NA	NA
on.gene.LG1.554	E004	NA	NA	NA	NA	NA	NA	NA	NA	NA	NA	0.0383941	NA	NA	NA	NA
on.gene.LG1.556	E002	NA	NA	NA	0.0123697	NA	NA	NA	NA	NA	NA	NA	NA	NA	NA	NA
on.gene.LG1.556	E006	NA	NA	NA	0.0221747	NA	NA	NA	NA	NA	NA	NA	NA	NA	NA	NA
on.gene.LG1.556	E007	NA	NA	NA	NA	NA	NA	NA	NA	NA	NA	0.044885	NA	NA	NA	NA
on.gene.LG1.556	E010	NA	0.0134469	0.000469363	NA	0.0058397	NA	0.00145381	NA	NA	0.0018498	NA	0.0168587	0.00311051	NA	NA
on.gene.LG1.556	E011	NA	0.0108165	NA	NA	NA	NA	0.0198138	NA	NA	NA	NA	NA	0.0376402	NA	NA
on.gene.LG1.557	E001	NA	NA	NA	0.000309833	0.00289951	NA	0.0403766	NA	NA	NA	0.000132014	0.00120914	0.0253846	NA	NA
on.gene.LG1.557	E002	NA	NA	NA	0.0003545	0.00538253	NA	NA	NA	NA	NA	0.00025111	0.00380988	NA	NA	NA
on.gene.LG1.557	E003	NA	NA	0.027457	NA	0.00877486	NA	0.039212	NA	NA	NA	0.000167749	NA	NA	NA	NA
on.gene.LG1.557	E006	NA	NA	NA	0.0190551	NA	NA	NA	NA	NA	NA	NA	NA	NA	NA	NA
on.gene.LG1.557	E008	NA	NA	NA	0.0024599	0.0118293	NA	NA	NA	NA	NA	NA	NA	NA	NA	NA
on.gene.LG1.557	E009	NA	NA	NA	0.0412271	NA	NA	NA	NA	NA	NA	0.0253968	0.037726	NA	NA	NA
on.gene.LG1.557	E012	NA	NA	NA	NA	NA	NA	NA	NA	NA	NA	0.0284112	NA	0.0233664	NA	NA
on.gene.LG1.558	E003	NA	NA	NA	NA	NA	NA	NA	NA	NA	NA	NA	NA	0.00288722	NA	NA
on.gene.LG1.558	E005	NA	NA	NA	NA	NA	NA	NA	NA	NA	0.0357312	NA	NA	NA	NA	NA
on.gene.LG1.558	E020	NA	NA	NA	0.0147827	NA	NA	NA	NA	NA	0.0211282	0.000263575	NA	NA	NA	NA
on.gene.LG1.558	E032	NA	NA	NA	NA	NA	NA	NA	NA	NA	NA	NA	NA	0.0371165	NA	NA
on.gene.LG1.558	E040	NA	NA	NA	NA	NA	NA	0.00361148	NA	NA	NA	NA	0.0496428	NA	0.0194543	NA
on.gene.LG1.56	E007	NA	NA	NA	NA	0.0381992	NA	NA	NA	NA	NA	NA	NA	NA	NA	NA
on.gene.LG1.56	E010	NA	NA	NA	NA	NA	NA	NA	NA	NA	NA	NA	0.0388327	NA	NA	NA
on.gene.LG1.56	E019	NA	NA	NA	NA	NA	NA	NA	NA	NA	NA	NA	0.0239533	NA	NA	NA
on.gene.LG1.56	E021	NA	0.0191513	NA	NA	0.0401333	NA	NA	0.0333704	NA	NA	NA	NA	NA	NA	NA
on.gene.LG1.56	E022	NA	NA	NA	NA	NA	NA	NA	NA	NA	NA	NA	NA	0.015565	NA	NA
on.gene.LG1.56	E023	NA	NA	NA	NA	NA	NA	NA	NA	NA	NA	NA	0.00541742	NA	NA	NA
on.gene.LG1.56	E024	NA	NA	NA	NA	NA	NA	NA	NA	NA	NA	NA	0.0319602	NA	NA	NA
on.gene.LG1.562	E003	NA	NA	NA	NA	NA	NA	NA	NA	NA	0.0455438	NA	NA	NA	NA	NA
on.gene.LG1.562	E019	NA	NA	NA	NA	NA	NA	NA	NA	NA	NA	NA	NA	0.0404912	NA	NA
on.gene.LG1.5620002+on.gene.LG1.5620001	E001	NA	0.0480349	NA	NA	NA	NA	NA	NA	NA	NA	NA	0.0114712	NA	NA	NA
on.gene.LG1.5620002+on.gene.LG1.5620001	E010	NA	NA	NA	NA	NA	NA	NA	NA	NA	NA	NA	NA	0.0311909	NA	NA
on.gene.LG1.5620002+on.gene.LG1.5620001	E012	NA	0.00711202	NA	NA	NA	NA	NA	NA	NA	NA	NA	0.0166534	NA	NA	NA
on.gene.LG1.563	E010	NA	NA	NA	NA	NA	NA	0.0155673	NA	NA	NA	NA	NA	0.0139447	NA	NA
on.gene.LG1.564	E002	NA	NA	NA	NA	NA	NA	NA	NA	NA	0.0377592	0.00253884	0.000178346	NA	NA	NA
on.gene.LG1.564	E003	NA	NA	0.00308103	0.00173058	0.00474977	NA	NA	NA	NA	0.000304921	NA	0.000148337	0.0229058	NA	NA
on.gene.LG1.564	E004	NA	NA	0.0286292	0.0173852	0.0183004	NA	NA	NA	NA	0.0422198	0.0149663	0.0136569	NA	NA	NA
on.gene.LG1.564	E010	NA	NA	NA	NA	NA	NA	NA	NA	NA	NA	0.00793627	0.00380076	NA	NA	NA
on.gene.LG1.564	E011	NA	NA	NA	0.0273245	NA	NA	NA	NA	NA	NA	0.0110025	0.0389732	NA	NA	NA
on.gene.LG1.566	E001	NA	NA	NA	NA	NA	NA	NA	NA	NA	NA	0.0438263	0.00299686	NA	NA	NA
on.gene.LG1.566	E002	NA	NA	NA	NA	NA	NA	NA	NA	NA	0.00253411	0.0297973	0.000427668	0.000526541	NA	NA
on.gene.LG1.566	E005	NA	NA	NA	NA	NA	NA	NA	NA	NA	NA	NA	NA	0.0160082	NA	NA
on.gene.LG1.566	E016	NA	NA	NA	NA	NA	NA	NA	NA	NA	NA	NA	NA	NA	NA	0.0379192
on.gene.LG1.566	E017	NA	0.014206	NA	NA	NA	NA	NA	NA	NA	NA	NA	NA	NA	NA	0.0322412
on.gene.LG1.566	E023	NA	NA	NA	NA	NA	NA	NA	NA	NA	NA	0.0130578	NA	NA	NA	NA
on.gene.LG1.566	E024	NA	NA	NA	NA	NA	NA	NA	NA	NA	NA	0.000603299	NA	NA	NA	NA
on.gene.LG1.566	E025	NA	NA	NA	NA	NA	NA	NA	NA	NA	NA	0.0161027	NA	0.00478258	NA	NA
on.gene.LG1.567	E002	0.046871	NA	NA	0.00668055	0.0350186	NA	NA	NA	NA	NA	NA	NA	NA	NA	0.0143448
on.gene.LG1.567	E003	NA	NA	NA	NA	0.0309574	NA	NA	NA	0.0389061	NA	0.00012919	NA	NA	NA	NA
on.gene.LG1.567	E004	NA	NA	NA	NA	NA	NA	NA	NA	NA	NA	0.0454138	0.0261744	NA	NA	NA
on.gene.LG1.567	E005	NA	NA	NA	NA	NA	NA	NA	NA	0.00132854	NA	0.000168712	0.000150879	NA	NA	0.00100759
on.gene.LG1.567	E006	NA	NA	NA	NA	NA	NA	0.0120208	NA	NA	NA	0.00350017	0.0185435	NA	NA	0.0089955
on.gene.LG1.567	E007	NA	NA	NA	NA	NA	NA	NA	NA	NA	NA	0.0057887	0.0290331	NA	NA	NA
on.gene.LG1.567	E008	NA	NA	NA	NA	NA	NA	NA	NA	NA	NA	NA	0.00193386	NA	NA	NA
on.gene.LG1.567	E009	NA	NA	NA	NA	NA	NA	NA	NA	0.00931875	NA	0.0063077	0.012058	NA	NA	0.00420091
on.gene.LG1.567	E010	NA	NA	NA	NA	NA	NA	0.0332172	NA	NA	NA	NA	NA	NA	NA	0.00779958
on.gene.LG1.567	E011	NA	NA	NA	NA	NA	NA	NA	NA	NA	NA	0.00616025	0.0339985	NA	NA	0.0198431
on.gene.LG1.567	E012	NA	NA	NA	NA	NA	NA	NA	0.0144383	0.0153837	NA	NA	NA	NA	NA	0.0260894
on.gene.LG1.567	E017	NA	NA	NA	NA	NA	NA	NA	NA	NA	NA	0.0488954	NA	NA	NA	NA
on.gene.LG1.567	E019	NA	NA	NA	NA	NA	NA	NA	NA	NA	NA	0.00205009	0.0399258	NA	NA	NA
on.gene.LG1.567	E020	NA	NA	NA	NA	NA	NA	NA	NA	0.0163698	NA	0.00676047	0.0234027	NA	NA	0.004076
on.gene.LG1.567	E025	NA	NA	NA	NA	NA	NA	NA	NA	NA	NA	0.00972982	NA	NA	NA	NA
on.gene.LG1.567	E026	NA	NA	NA	NA	NA	NA	NA	NA	NA	0.0232515	0.000140171	NA	NA	NA	0.00309765
on.gene.LG1.567	E027	NA	0.0336736	NA	NA	NA	NA	NA	NA	NA	NA	0.00870454	NA	NA	NA	0.000299933
on.gene.LG1.567	E028	NA	NA	NA	NA	NA	NA	NA	NA	NA	NA	NA	0.00981435	0.0296781	NA	NA
on.gene.LG1.567	E029	NA	NA	NA	NA	NA	NA	NA	NA	NA	NA	NA	0.0118849	NA	NA	NA
on.gene.LG1.57	E003	NA	NA	NA	NA	0.0408751	NA	NA	NA	NA	NA	NA	0.0249526	NA	NA	NA
on.gene.LG1.57	E004	NA	0.028368	NA	NA	0.0180431	NA	NA	NA	NA	NA	NA	0.0001923	NA	NA	NA
on.gene.LG1.57	E008	NA	0.0420932	NA	NA	0.0490816	NA	NA	NA	NA	NA	NA	NA	NA	NA	NA
on.gene.LG1.57	E015	NA	NA	NA	NA	NA	NA	NA	NA	NA	NA	NA	0.0222636	NA	NA	NA
on.gene.LG1.57	E018	NA	NA	NA	NA	NA	NA	NA	NA	NA	NA	NA	0.0357438	NA	NA	NA
on.gene.LG1.570	E001	NA	0.0300284	NA	NA	NA	NA	NA	NA	NA	NA	NA	0.0285248	NA	NA	NA
on.gene.LG1.570	E002	NA	0.0269238	NA	NA	NA	NA	NA	NA	NA	NA	NA	0.0254155	NA	NA	NA
on.gene.LG1.572	E001	NA	0.0287898	NA	NA	NA	NA	NA	NA	NA	NA	NA	NA	NA	NA	NA
on.gene.LG1.572	E002	NA	0.0183309	NA	NA	NA	NA	NA	NA	NA	NA	NA	NA	NA	NA	NA
on.gene.LG1.572	E003	NA	NA	0.000963329	0.000414796	NA	NA	NA	NA	NA	0.00446198	0.00141671	NA	NA	NA	NA
on.gene.LG1.572	E004	NA	NA	0.00587505	0.0347584	NA	NA	NA	NA	NA	0.0327039	NA	NA	NA	NA	NA
on.gene.LG1.572	E005	NA	NA	NA	0.0162287	NA	NA	NA	NA	NA	NA	0.00661491	NA	NA	NA	NA
on.gene.LG1.572	E008	NA	NA	NA	NA	NA	NA	0.00414364	NA	NA	0.0385009	0.0324232	NA	0.000142956	NA	NA
on.gene.LG1.572	E010	NA	NA	NA	NA	NA	NA	0.0494222	NA	NA	0.0359639	0.0466467	NA	0.0187865	NA	NA
on.gene.LG1.572	E011	NA	NA	NA	0.0098819	0.0254458	NA	0.00383153	NA	NA	NA	0.000911508	0.00283663	0.00017007	NA	NA
on.gene.LG1.572	E012	NA	NA	NA	0.0122674	0.0019417	NA	0.0107341	NA	NA	NA	0.000912024	NA	0.000470478	NA	NA
on.gene.LG1.572	E017	NA	NA	NA	NA	NA	NA	0.0312563	NA	NA	NA	NA	0.00347643	NA	NA	0.018085
on.gene.LG1.572	E018	NA	0.0401946	NA	NA	NA	NA	0.00840466	NA	NA	NA	NA	0.000787342	NA	0.0119902	0.000939592
on.gene.LG1.572	E019	NA	0.000266722	0.0119427	0.000244421	NA	NA	NA	0.0161362	NA	NA	0.00221142	NA	NA	NA	0.00743737
on.gene.LG1.573	E002	NA	NA	NA	NA	0.000197567	NA	NA	NA	NA	NA	NA	0.00135718	NA	NA	NA
on.gene.LG1.573	E009	NA	0.0171092	NA	0.0345633	NA	NA	NA	NA	NA	0.00118621	NA	NA	NA	NA	0.0498869
on.gene.LG1.573	E011	NA	NA	NA	0.0195369	NA	NA	NA	NA	NA	NA	0.00055578	NA	0.0123663	NA	NA
on.gene.LG1.573	E012	NA	NA	NA	NA	NA	NA	NA	NA	NA	NA	0.00157401	NA	NA	NA	NA
on.gene.LG1.573	E014	NA	NA	NA	NA	NA	NA	NA	NA	NA	NA	0.0184087	0.0039234	0.00756602	NA	NA
on.gene.LG1.574	E001	NA	NA	NA	NA	NA	NA	NA	NA	NA	NA	NA	NA	0.049931	NA	NA
on.gene.LG1.574	E002	NA	NA	NA	NA	0.0286736	NA	0.0489721	NA	NA	NA	NA	0.0498673	NA	NA	NA
on.gene.LG1.574	E011	NA	NA	NA	0.000147027	0.000209448	NA	NA	NA	NA	0.00658069	NA	NA	NA	NA	NA
on.gene.LG1.575	E003	NA	NA	NA	NA	NA	NA	NA	NA	NA	NA	NA	0.0416038	NA	NA	NA
on.gene.LG1.575	E015	NA	NA	NA	NA	NA	NA	NA	NA	NA	NA	NA	0.018338	NA	NA	NA
on.gene.LG1.576	E002	NA	0.0398462	NA	NA	NA	NA	NA	NA	0.043493	NA	NA	NA	NA	NA	NA
on.gene.LG1.576	E005	NA	NA	NA	NA	NA	NA	NA	NA	0.0331915	NA	NA	NA	NA	NA	NA
on.gene.LG1.576	E007	NA	NA	NA	NA	NA	NA	NA	NA	0.0327574	NA	NA	NA	NA	NA	NA
on.gene.LG1.579	E001	NA	NA	NA	0.0449729	NA	NA	NA	NA	NA	NA	0.0181126	NA	NA	NA	NA
on.gene.LG1.579	E003	NA	NA	0.0422014	0.0116896	NA	NA	NA	NA	NA	NA	0.0180761	NA	NA	NA	NA
on.gene.LG1.579	E004	NA	0.0213992	NA	0.0155135	NA	NA	NA	NA	NA	0.00805136	0.000354546	NA	NA	NA	0.0285497
on.gene.LG1.579	E006	NA	NA	NA	NA	NA	NA	0.0159764	NA	NA	NA	NA	NA	0.00432021	NA	NA
on.gene.LG1.579	E007	NA	NA	NA	NA	0.00923421	NA	0.0130759	NA	NA	NA	0.00716882	NA	0.000124644	NA	NA
on.gene.LG1.579	E008	NA	NA	NA	NA	NA	NA	NA	NA	NA	NA	NA	0.00451486	0.0223021	NA	NA
on.gene.LG1.579	E011	NA	NA	NA	0.039626	NA	NA	NA	NA	NA	NA	NA	NA	NA	NA	NA
on.gene.LG1.579	E012	NA	NA	NA	0.041357	0.0336445	NA	NA	NA	NA	NA	NA	NA	NA	NA	NA
on.gene.LG1.579	E014	NA	NA	NA	NA	0.00189639	NA	0.0128896	0.0411081	NA	NA	NA	NA	0.000149196	NA	NA
on.gene.LG1.579	E015	NA	NA	NA	NA	NA	NA	NA	NA	NA	0.00287548	0.00909283	NA	0.000311733	NA	NA
on.gene.LG1.58	E001	NA	NA	NA	NA	NA	NA	NA	NA	0.0161128	NA	NA	NA	0.00509903	NA	0.0365079
on.gene.LG1.58	E002	NA	NA	NA	NA	NA	NA	NA	NA	0.0229816	NA	NA	NA	0.00115926	NA	0.00411836
on.gene.LG1.58	E003	NA	NA	NA	NA	NA	NA	0.000250478	NA	0.0232042	0.012209	0.00611233	NA	NA	NA	0.0294304
on.gene.LG1.58	E004	NA	0.00767851	NA	NA	NA	NA	NA	NA	NA	NA	NA	NA	0.0105904	NA	NA
on.gene.LG1.58	E007	NA	NA	NA	NA	NA	NA	NA	NA	NA	NA	NA	NA	0.0415906	NA	NA
on.gene.LG1.58	E012	NA	NA	NA	NA	NA	NA	NA	NA	NA	0.0164037	NA	0.0239116	0.0375595	NA	NA
on.gene.LG1.58	E017	NA	NA	NA	NA	NA	NA	NA	NA	NA	NA	NA	NA	0.00515615	NA	NA
on.gene.LG1.58	E018	NA	NA	NA	NA	NA	NA	NA	NA	NA	NA	NA	NA	0.00401407	NA	NA
on.gene.LG1.581	E001	NA	NA	NA	NA	NA	NA	NA	NA	NA	NA	0.0178945	NA	NA	NA	NA
on.gene.LG1.581	E008	NA	NA	NA	NA	NA	NA	NA	NA	NA	NA	0.031749	NA	NA	NA	NA
on.gene.LG1.581	E010	NA	0.0369146	NA	NA	NA	NA	NA	NA	NA	NA	NA	NA	NA	NA	NA
on.gene.LG1.581	E015	NA	NA	NA	NA	NA	NA	NA	NA	NA	NA	0.0314794	NA	NA	NA	NA
on.gene.LG1.581	E016	NA	0.0454392	NA	NA	NA	NA	NA	NA	NA	NA	0.00462269	NA	NA	NA	NA
on.gene.LG1.581	E017	NA	0.0354594	NA	NA	NA	NA	NA	NA	NA	NA	0.0043927	NA	NA	NA	NA
on.gene.LG1.582	E002	NA	NA	NA	NA	NA	NA	NA	NA	NA	NA	0.0179214	NA	NA	NA	NA
on.gene.LG1.583	E001	NA	0.043783	NA	NA	NA	NA	NA	NA	NA	NA	NA	NA	NA	NA	NA
on.gene.LG1.583	E022	NA	NA	NA	NA	NA	NA	NA	NA	NA	NA	0.0344903	NA	NA	NA	NA
on.gene.LG1.583	E027	NA	NA	NA	NA	NA	NA	NA	NA	NA	NA	0.0440076	NA	NA	NA	NA
on.gene.LG1.587	E001	NA	NA	NA	NA	NA	NA	NA	NA	NA	NA	NA	NA	0.0133832	NA	NA
on.gene.LG1.587	E009	NA	NA	NA	NA	NA	NA	NA	NA	NA	NA	0.0305096	NA	0.0365547	NA	NA
on.gene.LG1.587	E010	NA	NA	NA	NA	NA	NA	0.0247946	NA	NA	NA	NA	NA	0.00900679	NA	NA
on.gene.LG1.589	E001	NA	NA	NA	NA	0.00933576	NA	NA	NA	NA	0.000427117	NA	NA	0.000623297	NA	NA
on.gene.LG1.589	E007	NA	NA	NA	NA	0.0183026	NA	NA	NA	NA	NA	0.0109716	0.000169808	0.000911389	NA	NA
on.gene.LG1.59	E001	NA	NA	NA	NA	NA	NA	NA	NA	NA	NA	NA	0.00811124	0.0409027	NA	NA
on.gene.LG1.590	E004	NA	NA	NA	NA	0.0406909	NA	NA	NA	NA	NA	NA	0.00237098	NA	NA	NA
on.gene.LG1.590	E005	NA	NA	NA	NA	0.0461106	NA	NA	NA	NA	NA	NA	NA	NA	NA	NA
on.gene.LG1.592	E001	NA	NA	NA	NA	0.0290567	NA	NA	0.00839454	NA	NA	0.00111675	NA	NA	0.0118425	NA
on.gene.LG1.592	E002	NA	NA	NA	0.00020929	NA	NA	NA	0.0257993	NA	0.026563	NA	NA	NA	0.00122667	0.00127205
on.gene.LG1.592	E003	NA	NA	NA	0.0280599	NA	NA	NA	NA	NA	NA	NA	NA	NA	NA	NA
on.gene.LG1.592	E004	NA	NA	NA	NA	0.00662138	NA	NA	0.0389662	NA	NA	NA	NA	0.0265413	0.013486	0.0208129
on.gene.LG1.593	E001	NA	NA	NA	NA	NA	NA	NA	NA	NA	NA	0.0204594	NA	0.0222154	NA	NA
on.gene.LG1.593	E006	NA	NA	NA	NA	NA	NA	NA	NA	NA	NA	NA	0.0231758	NA	NA	NA
on.gene.LG1.596	E006	NA	NA	NA	NA	NA	NA	NA	NA	NA	NA	0.0431953	NA	NA	NA	NA
on.gene.LG1.597	E003	NA	NA	0.000228926	NA	NA	NA	0.0318071	NA	NA	NA	NA	NA	NA	NA	NA
on.gene.LG1.597	E004	NA	0.0366199	NA	NA	NA	NA	NA	NA	NA	NA	NA	NA	NA	NA	NA
on.gene.LG1.599	E002	NA	NA	NA	NA	NA	NA	NA	NA	NA	NA	NA	0.0213789	NA	NA	NA
on.gene.LG1.599	E003	NA	NA	NA	NA	NA	NA	NA	NA	NA	NA	NA	0.000621291	NA	NA	NA
on.gene.LG1.599	E006	NA	NA	NA	NA	NA	NA	NA	NA	NA	0.0183118	0.0170946	0.00379661	NA	NA	NA
on.gene.LG1.600	E003	NA	NA	NA	NA	NA	NA	NA	0.0208515	NA	NA	NA	0.0197289	NA	NA	NA
on.gene.LG1.600	E017	0.048005	NA	NA	NA	NA	NA	NA	NA	NA	NA	NA	NA	NA	NA	NA
on.gene.LG1.600	E021	NA	NA	NA	NA	NA	NA	NA	NA	NA	NA	NA	0.0198504	NA	NA	NA
on.gene.LG1.603	E005	NA	NA	NA	NA	NA	NA	NA	NA	NA	NA	0.00368075	0.0235974	0.00804428	NA	NA
on.gene.LG1.604	E001	NA	NA	NA	NA	NA	NA	NA	0.0492647	NA	NA	NA	0.00625504	0.0257036	NA	NA
on.gene.LG1.604	E007	NA	0.0275289	NA	NA	NA	NA	NA	NA	NA	NA	NA	0.0101274	NA	NA	NA
on.gene.LG1.604	E009	NA	NA	NA	NA	NA	NA	NA	NA	0.0451888	NA	NA	NA	NA	NA	NA
on.gene.LG1.604	E012	NA	NA	NA	NA	NA	NA	NA	NA	NA	NA	0.0165651	NA	NA	NA	NA
on.gene.LG1.604	E013	NA	NA	NA	NA	NA	NA	NA	NA	NA	NA	0.00234541	NA	NA	NA	NA
on.gene.LG1.604	E018	NA	NA	NA	NA	0.000604114	NA	NA	0.0451744	NA	NA	NA	NA	0.0217406	NA	NA
on.gene.LG1.604	E019	NA	NA	NA	NA	0.00176037	NA	NA	0.0394917	NA	NA	NA	NA	0.0148354	NA	NA
on.gene.LG1.604	E020	NA	NA	NA	NA	0.00332365	NA	NA	0.0278299	NA	NA	NA	NA	0.01541	NA	NA
on.gene.LG1.605	E002	NA	0.0283878	NA	NA	NA	NA	NA	NA	NA	NA	NA	0.00502781	NA	NA	NA
on.gene.LG1.605	E003	NA	0.00133528	NA	NA	NA	NA	NA	NA	NA	NA	NA	0.000121884	NA	NA	NA
on.gene.LG1.605	E004	NA	NA	NA	NA	NA	NA	NA	NA	NA	NA	NA	0.00863899	NA	NA	NA
on.gene.LG1.605	E018	NA	NA	NA	NA	NA	NA	NA	NA	NA	NA	NA	0.00934623	NA	NA	NA
on.gene.LG1.605	E019	NA	NA	NA	NA	NA	NA	NA	NA	NA	NA	NA	0.00949188	NA	NA	NA
on.gene.LG1.605	E020	NA	0.014885	NA	NA	NA	NA	NA	NA	NA	NA	NA	0.000362632	NA	NA	NA
on.gene.LG1.608	E003	NA	0.0213613	NA	NA	NA	NA	NA	NA	NA	NA	NA	NA	NA	NA	NA
on.gene.LG1.608	E004	NA	NA	NA	NA	0.0482413	NA	NA	NA	NA	NA	NA	0.00868804	0.0107723	NA	NA
on.gene.LG1.608	E005	NA	NA	NA	NA	NA	NA	NA	NA	NA	NA	NA	NA	0.0279052	NA	NA
on.gene.LG1.608	E009	NA	NA	NA	NA	NA	NA	NA	NA	NA	NA	NA	NA	0.0212976	NA	NA
on.gene.LG1.608	E014	NA	NA	NA	NA	NA	NA	NA	NA	NA	NA	NA	NA	0.00952463	NA	NA
on.gene.LG1.608	E022	NA	NA	0.0401689	NA	NA	NA	NA	NA	NA	NA	NA	NA	NA	NA	NA
on.gene.LG1.608	E024	NA	NA	NA	NA	0.0492464	NA	NA	NA	0.00926407	NA	NA	NA	NA	NA	NA
on.gene.LG1.608	E025	NA	0.0402627	NA	NA	NA	NA	NA	NA	0.00335819	NA	NA	NA	0.00099724	NA	NA
on.gene.LG1.608	E026	NA	NA	NA	NA	NA	NA	NA	NA	NA	NA	NA	NA	0.0392567	NA	NA
on.gene.LG1.608	E029	NA	NA	NA	NA	0.0108345	NA	NA	NA	NA	NA	0.0303408	NA	0.0110955	NA	NA
on.gene.LG1.608	E031	NA	0.00467388	NA	NA	NA	NA	NA	NA	NA	NA	0.0400037	NA	NA	NA	0.00111361
on.gene.LG1.609	E001	0.0106641	NA	NA	NA	NA	NA	NA	NA	NA	0.0494484	NA	NA	NA	NA	NA
on.gene.LG1.61	E009	NA	NA	NA	0.00762339	NA	NA	NA	NA	NA	NA	NA	NA	NA	NA	NA
on.gene.LG1.612	E001	NA	NA	NA	NA	NA	NA	NA	NA	NA	NA	0.00127188	0.0413074	NA	NA	NA
on.gene.LG1.613	E001	NA	NA	NA	NA	NA	NA	0.0204445	NA	NA	NA	NA	NA	0.00616847	NA	NA
on.gene.LG1.613	E015	NA	NA	0.0288174	NA	NA	NA	NA	NA	NA	NA	NA	NA	NA	NA	NA
on.gene.LG1.615	E003	NA	NA	NA	NA	NA	NA	NA	NA	NA	NA	NA	NA	0.0148828	NA	NA
on.gene.LG1.615	E004	NA	NA	NA	NA	NA	NA	NA	NA	NA	NA	NA	NA	0.047331	NA	NA
on.gene.LG1.615	E025	NA	NA	NA	NA	NA	NA	NA	NA	NA	NA	0.00636841	NA	NA	NA	NA
on.gene.LG1.615	E033	NA	NA	NA	NA	NA	NA	NA	NA	NA	NA	0.0144243	NA	0.0031787	NA	NA
on.gene.LG1.618	E001	NA	0.0229088	NA	0.00179622	NA	NA	NA	NA	NA	NA	NA	NA	NA	NA	0.00529051
on.gene.LG1.618	E002	NA	0.0253936	NA	0.00264424	NA	NA	NA	NA	NA	NA	NA	NA	NA	NA	0.0211397
on.gene.LG1.618	E003	NA	NA	NA	0.00173814	NA	NA	NA	NA	NA	NA	NA	0.00332721	NA	NA	0.0250184
on.gene.LG1.618	E004	NA	NA	NA	NA	0.0214607	NA	NA	0.00362247	NA	NA	NA	NA	0.000284429	NA	0.00998469
on.gene.LG1.618	E005	NA	0.0143447	NA	NA	0.00653123	NA	NA	NA	NA	0.0370591	NA	NA	NA	NA	NA
on.gene.LG1.618	E006	NA	0.0205872	NA	NA	NA	NA	NA	NA	NA	NA	NA	0.0193081	NA	NA	NA
on.gene.LG1.618	E007	NA	0.0135801	NA	NA	NA	NA	NA	NA	NA	NA	NA	NA	NA	NA	0.0353975
on.gene.LG1.618	E008	NA	0.000575259	NA	NA	NA	NA	NA	NA	NA	NA	NA	0.00194392	NA	NA	NA
on.gene.LG1.618	E009	NA	NA	NA	NA	0.000931136	NA	NA	0.00817977	NA	NA	NA	NA	0.0160362	NA	0.0318978
on.gene.LG1.618	E010	NA	0.0200699	NA	NA	NA	NA	0.0025434	NA	NA	0.000746263	0.0011148	NA	NA	NA	NA
on.gene.LG1.618	E011	NA	NA	NA	NA	NA	NA	NA	NA	NA	NA	NA	0.0427652	NA	NA	NA
on.gene.LG1.618	E015	NA	NA	NA	NA	NA	NA	NA	NA	NA	NA	NA	0.0185925	NA	NA	NA
on.gene.LG1.618	E016	NA	0.00575142	NA	NA	NA	NA	NA	0.00791202	NA	NA	NA	0.0010639	NA	NA	NA
on.gene.LG1.618	E017	NA	NA	NA	NA	NA	NA	NA	0.0137531	0.025967	NA	0.00027849	NA	0.0279068	NA	NA
on.gene.LG1.618	E018	NA	NA	NA	NA	0.00182847	NA	NA	0.0211203	NA	NA	NA	NA	0.00429025	NA	NA
on.gene.LG1.618	E019	NA	NA	NA	NA	0.00526475	NA	NA	NA	NA	NA	0.0359976	0.00063277	NA	NA	NA
on.gene.LG1.618	E020	NA	NA	NA	NA	NA	NA	NA	NA	NA	NA	0.0168843	NA	NA	NA	NA
on.gene.LG1.618	E024	NA	NA	NA	NA	0.0376172	NA	NA	NA	NA	NA	NA	NA	NA	NA	NA
on.gene.LG1.618	E026	NA	NA	NA	NA	0.0319763	NA	0.0343803	NA	NA	NA	NA	0.036895	0.0304011	NA	NA
on.gene.LG1.618	E027	NA	0.00366877	NA	NA	0.0086	NA	NA	NA	NA	NA	NA	0.000254244	0.00420603	NA	0.0375959
on.gene.LG1.618	E028	NA	0.0087607	NA	NA	NA	NA	NA	NA	NA	NA	NA	NA	NA	NA	NA
on.gene.LG1.618	E029	NA	NA	NA	0.0242487	NA	NA	NA	NA	NA	NA	NA	NA	NA	NA	NA
on.gene.LG1.618	E030	NA	NA	0.00875594	0.00340141	NA	NA	NA	NA	NA	NA	NA	NA	NA	NA	NA
on.gene.LG1.618	E033	NA	0.00109636	NA	NA	0.0260999	NA	NA	NA	NA	0.0258248	NA	NA	NA	NA	0.0344698
on.gene.LG1.618	E034	NA	0.00167451	NA	NA	0.0094269	NA	NA	NA	NA	NA	NA	NA	NA	NA	0.0438499
on.gene.LG1.618	E035	NA	0.00255964	NA	NA	0.0216616	NA	NA	NA	NA	0.000206126	NA	NA	NA	NA	NA
on.gene.LG1.618	E036	NA	NA	NA	NA	NA	NA	NA	NA	NA	NA	NA	NA	0.0166657	NA	NA
on.gene.LG1.618	E037	NA	NA	NA	0.0461685	NA	NA	NA	NA	NA	NA	NA	0.000183309	NA	NA	NA
on.gene.LG1.618	E038	NA	NA	NA	0.00425089	NA	NA	NA	0.00142382	NA	NA	NA	0.000107313	NA	NA	0.00714482
on.gene.LG1.619	E001	NA	0.0269663	0.000155424	NA	0.00584388	NA	0.000703633	NA	NA	0.000353671	NA	0.0077651	0.000772479	NA	NA
on.gene.LG1.619	E002	NA	NA	NA	0.0478992	0.0260166	NA	NA	NA	NA	NA	NA	NA	NA	NA	NA
on.gene.LG1.619	E004	NA	NA	NA	NA	0.000114229	NA	0.000167237	NA	NA	NA	NA	0.000658351	0.000693118	NA	NA
on.gene.LG1.619	E005	NA	NA	0.0365495	0.000714929	NA	NA	NA	NA	NA	NA	0.00144291	NA	NA	NA	NA
on.gene.LG1.623	E001	NA	NA	NA	NA	NA	NA	NA	NA	NA	NA	NA	0.00394701	0.00503758	NA	NA
on.gene.LG1.623	E003	NA	NA	NA	NA	NA	NA	NA	NA	NA	NA	NA	0.0203539	0.0313918	NA	NA
on.gene.LG1.623	E004	NA	NA	NA	NA	NA	NA	NA	NA	NA	NA	NA	0.0113012	0.0106721	NA	NA
on.gene.LG1.623	E010	NA	NA	NA	NA	NA	NA	NA	NA	NA	NA	NA	NA	0.014604	NA	NA
on.gene.LG1.623	E011	NA	NA	NA	NA	NA	NA	NA	NA	NA	NA	NA	NA	0.0100271	NA	NA
on.gene.LG1.623	E019	NA	NA	NA	NA	NA	NA	NA	NA	NA	NA	NA	NA	0.0396942	NA	NA
on.gene.LG1.623	E020	NA	NA	NA	NA	NA	NA	NA	NA	NA	NA	NA	NA	0.0439665	NA	NA
on.gene.LG1.623	E021	NA	NA	NA	NA	NA	NA	NA	NA	NA	NA	NA	NA	0.0165916	NA	NA
on.gene.LG1.623	E023	NA	NA	NA	0.0333562	NA	NA	NA	NA	NA	NA	NA	NA	0.00915162	NA	0.0034005
on.gene.LG1.624	E001	NA	NA	NA	NA	NA	NA	NA	NA	NA	NA	0.0208301	NA	NA	NA	0.000585357
on.gene.LG1.624	E004	0.0424872	NA	NA	NA	NA	NA	NA	NA	NA	NA	0.0483535	NA	NA	NA	NA
on.gene.LG1.624	E005	0.0496812	NA	NA	NA	NA	NA	NA	NA	NA	NA	0.0248776	NA	NA	NA	NA
on.gene.LG1.624	E009	NA	NA	NA	NA	NA	NA	NA	NA	NA	0.00111944	0.00840918	0.00596032	NA	NA	NA
on.gene.LG1.629	E002	NA	NA	NA	NA	NA	NA	NA	NA	NA	NA	NA	0.0125802	NA	NA	NA
on.gene.LG1.629	E003	NA	NA	NA	NA	NA	NA	NA	NA	NA	NA	NA	NA	0.0250995	NA	NA
on.gene.LG1.629	E004	NA	NA	NA	0.00577759	NA	NA	NA	NA	NA	NA	NA	NA	NA	NA	0.00291173
on.gene.LG1.629	E011	NA	NA	NA	NA	NA	NA	NA	NA	NA	NA	NA	NA	0.0060704	NA	0.00911885
on.gene.LG1.629	E012	NA	NA	NA	NA	NA	NA	NA	NA	NA	0.00474732	NA	0.00924249	0.000690653	NA	NA
on.gene.LG1.629	E013	NA	NA	NA	NA	NA	NA	NA	NA	NA	NA	0.00514359	0.000806875	0.000939262	NA	NA
on.gene.LG1.629	E014	NA	NA	NA	NA	NA	NA	NA	NA	NA	NA	NA	NA	0.0119836	NA	NA
on.gene.LG1.63	E006	NA	NA	NA	NA	NA	NA	NA	NA	NA	NA	0.0212676	NA	NA	NA	NA
on.gene.LG1.63	E007	NA	NA	NA	NA	NA	NA	NA	NA	NA	NA	0.0423624	NA	NA	NA	NA
on.gene.LG1.630	E001	NA	NA	NA	NA	NA	NA	NA	NA	NA	NA	NA	0.016392	NA	NA	0.00914088
on.gene.LG1.630	E002	NA	NA	NA	0.0398425	NA	NA	NA	NA	NA	NA	0.000319646	NA	NA	NA	NA
on.gene.LG1.630	E010	NA	NA	NA	NA	NA	NA	NA	NA	NA	NA	0.0239171	NA	NA	NA	NA
on.gene.LG1.633	E007	NA	NA	NA	NA	NA	NA	NA	NA	NA	NA	0.0291335	NA	NA	NA	NA
on.gene.LG1.633	E011	NA	NA	NA	NA	NA	NA	NA	NA	NA	NA	0.0140138	NA	NA	NA	NA
on.gene.LG1.633	E012	NA	NA	NA	NA	NA	NA	NA	NA	NA	NA	NA	NA	0.0129438	NA	NA
on.gene.LG1.633	E013	NA	NA	NA	NA	NA	NA	NA	NA	NA	NA	0.0208301	NA	NA	NA	NA
on.gene.LG1.634	E001	NA	NA	0.00189824	NA	0.0153066	NA	0.0218172	NA	NA	0.000254641	NA	0.00231434	0.0033314	NA	NA
on.gene.LG1.634	E003	NA	0.014885	0.0170702	NA	NA	NA	NA	NA	NA	0.0159383	NA	NA	NA	NA	0.0440059
on.gene.LG1.634	E005	NA	NA	NA	NA	NA	NA	NA	NA	NA	0.0497651	NA	NA	0.00798805	NA	NA
on.gene.LG1.634	E008	NA	NA	NA	NA	NA	NA	0.0226499	NA	NA	NA	NA	NA	NA	NA	0.0461378
on.gene.LG1.634	E009	NA	NA	NA	NA	NA	NA	NA	NA	NA	NA	NA	NA	NA	NA	0.0163854
on.gene.LG1.634	E014	NA	NA	NA	NA	NA	NA	NA	NA	NA	NA	NA	NA	0.024948	NA	NA
on.gene.LG1.634	E029	NA	NA	NA	NA	NA	NA	NA	NA	NA	NA	NA	NA	NA	NA	0.00925
on.gene.LG1.634	E030	NA	NA	NA	NA	NA	NA	NA	NA	NA	NA	NA	NA	NA	NA	0.0393954
on.gene.LG1.634	E031	NA	NA	NA	NA	NA	NA	NA	NA	NA	NA	NA	0.0140835	0.0158947	NA	NA
on.gene.LG1.635	E003	NA	NA	NA	NA	NA	NA	NA	NA	NA	NA	NA	0.0371653	0.0290236	NA	NA
on.gene.LG1.635	E014	NA	NA	NA	NA	NA	NA	0.034428	NA	NA	NA	NA	NA	0.0245158	NA	NA
on.gene.LG1.635	E017	NA	NA	NA	NA	0.000252822	NA	0.00204278	NA	NA	0.0288622	0.00467463	NA	NA	NA	NA
on.gene.LG1.635	E018	NA	NA	NA	NA	0.0295653	NA	NA	NA	NA	0.00177597	0.00208962	NA	0.000900027	NA	NA
on.gene.LG1.635	E019	NA	NA	NA	NA	NA	NA	NA	NA	NA	NA	NA	NA	0.0322345	NA	NA
on.gene.LG1.639	E001	0.00794914	NA	NA	NA	NA	NA	NA	NA	NA	NA	NA	NA	NA	NA	NA
on.gene.LG1.640	E001	NA	NA	NA	0.0049561	0.025159	NA	NA	NA	NA	NA	0.0136319	NA	NA	NA	NA
on.gene.LG1.640	E002	NA	NA	0.00834691	NA	0.00054698	NA	NA	NA	NA	NA	0.00107565	0.00721134	NA	NA	0.0319615
on.gene.LG1.640	E003	NA	NA	NA	0.022613	NA	NA	NA	NA	NA	NA	NA	NA	NA	NA	NA
on.gene.LG1.640	E009	NA	NA	0.0224156	0.00351731	NA	NA	NA	NA	NA	NA	0.0179931	NA	NA	NA	NA
on.gene.LG1.640	E010	NA	NA	0.0019042	0.000223515	0.00227813	NA	NA	NA	NA	0.00981453	0.000615346	0.00681184	NA	NA	NA
on.gene.LG1.641	E003	NA	NA	NA	NA	NA	NA	NA	NA	NA	NA	0.0234729	NA	NA	NA	NA
on.gene.LG1.641	E004	NA	NA	NA	NA	NA	NA	NA	NA	NA	NA	NA	NA	0.0191593	NA	NA
on.gene.LG1.644	E001	NA	0.00481925	NA	NA	0.028212	NA	NA	NA	NA	NA	NA	0.000826208	NA	NA	NA
on.gene.LG1.645	E001	NA	NA	NA	NA	NA	NA	NA	NA	NA	NA	NA	0.0364837	NA	NA	NA
on.gene.LG1.645	E010	NA	NA	NA	NA	0.0254554	NA	0.027879	NA	NA	NA	NA	NA	NA	NA	NA
on.gene.LG1.653	E001	NA	NA	NA	NA	NA	NA	NA	NA	NA	NA	NA	0.0277678	NA	NA	NA
on.gene.LG1.654	E005	NA	NA	NA	NA	NA	NA	NA	NA	NA	0.0070294	NA	NA	NA	NA	NA
on.gene.LG1.655	E001	NA	NA	NA	NA	NA	NA	NA	NA	NA	NA	0.0458306	NA	NA	NA	NA
on.gene.LG1.658	E002	NA	NA	NA	NA	NA	NA	NA	NA	NA	NA	0.0351518	NA	NA	NA	NA
on.gene.LG1.658	E015	NA	NA	NA	NA	NA	NA	NA	NA	NA	NA	NA	NA	0.0469895	NA	NA
on.gene.LG1.658	E018	NA	NA	NA	0.0115206	NA	0.0360924	NA	NA	NA	NA	NA	NA	NA	NA	NA
on.gene.LG1.660	E001	NA	NA	NA	0.00473283	NA	NA	NA	NA	NA	NA	NA	NA	NA	NA	0.00313345
on.gene.LG1.660	E002	NA	NA	NA	0.0462243	NA	NA	NA	NA	NA	NA	NA	NA	NA	NA	0.0308996
on.gene.LG1.660	E003	NA	NA	NA	0.00164013	NA	NA	NA	NA	NA	0.00048111	0.00562723	NA	NA	NA	NA
on.gene.LG1.660	E004	NA	NA	NA	0.00796105	0.0289606	NA	NA	NA	NA	NA	0.00121234	0.00690139	NA	0.00788558	NA
on.gene.LG1.660	E005	NA	NA	NA	NA	0.0133279	NA	NA	NA	NA	NA	NA	NA	NA	NA	NA
on.gene.LG1.660	E007	NA	NA	NA	NA	NA	NA	NA	NA	NA	NA	0.0279704	NA	NA	NA	NA
on.gene.LG1.660	E008	NA	0.0235237	NA	0.0152451	NA	NA	0.0151488	NA	0.0297131	NA	0.00169157	NA	0.00136777	NA	NA
on.gene.LG1.660	E009	NA	NA	0.0247642	0.000183388	NA	NA	NA	NA	NA	NA	0.000440064	0.000141215	NA	NA	NA
on.gene.LG1.660	E010	NA	NA	0.0490596	0.00612592	NA	NA	NA	NA	NA	0.000351125	NA	NA	NA	NA	NA
on.gene.LG1.660	E012	NA	NA	0.0227805	0.000148028	NA	NA	NA	NA	NA	NA	0.00369943	NA	NA	NA	NA
on.gene.LG1.660	E013	NA	NA	NA	0.0168461	NA	NA	NA	NA	NA	NA	NA	NA	NA	NA	NA
on.gene.LG1.660	E015	NA	NA	NA	NA	0.00657748	NA	NA	NA	NA	NA	NA	0.0010512	NA	NA	NA
on.gene.LG1.661	E002	NA	NA	NA	NA	NA	NA	NA	NA	NA	NA	NA	0.0368825	0.0105756	NA	NA
on.gene.LG1.661	E003	NA	0.0426363	0.0446409	NA	NA	NA	0.00725191	NA	NA	0.000520776	0.0124421	NA	NA	NA	NA
on.gene.LG1.661	E005	NA	0.0118212	NA	NA	NA	NA	0.00148278	NA	NA	0.000158782	0.00108624	NA	NA	NA	NA
on.gene.LG1.661	E006	NA	0.00178126	NA	NA	NA	NA	0.00888687	0.00421266	0.0267162	0.000648846	0.000415341	NA	NA	NA	NA
on.gene.LG1.661	E007	NA	NA	NA	NA	NA	NA	NA	NA	NA	NA	NA	0.00101878	0.0384185	NA	NA
on.gene.LG1.661	E008	NA	0.0374598	NA	NA	NA	NA	NA	NA	NA	NA	NA	0.0233025	0.0215454	NA	0.0436405
on.gene.LG1.661	E010	NA	NA	NA	NA	NA	NA	NA	NA	NA	NA	0.0273116	NA	0.000674547	NA	NA
on.gene.LG1.661	E011	NA	NA	NA	NA	NA	NA	0.0258314	NA	0.0176666	NA	0.039502	NA	0.00254597	NA	NA
on.gene.LG1.661	E013	NA	NA	NA	NA	NA	NA	NA	NA	NA	NA	NA	0.0464525	0.00218135	NA	NA
on.gene.LG1.661	E014	NA	NA	NA	NA	NA	NA	0.0204523	NA	NA	NA	NA	0.0079739	NA	NA	0.0276533
on.gene.LG1.661	E015	NA	NA	NA	NA	NA	NA	NA	NA	NA	NA	0.0359588	NA	NA	NA	NA
on.gene.LG1.661	E016	NA	NA	NA	NA	NA	NA	NA	NA	NA	NA	NA	NA	0.0368809	NA	NA
on.gene.LG1.661	E021	NA	NA	NA	NA	NA	NA	NA	NA	NA	NA	NA	0.0283791	NA	NA	NA
on.gene.LG1.661	E039	NA	NA	NA	0.0456814	NA	NA	NA	NA	NA	NA	0.00371803	0.00529379	NA	NA	NA
on.gene.LG1.661	E040	NA	NA	NA	0.00137057	0.00446299	NA	NA	NA	NA	NA	0.000466868	0.00155896	NA	NA	NA
on.gene.LG1.661	E042	NA	NA	NA	NA	NA	NA	NA	NA	NA	NA	NA	0.0318958	NA	NA	NA
on.gene.LG1.661	E043	NA	NA	NA	NA	NA	NA	NA	NA	NA	NA	NA	0.0421585	0.00189379	NA	NA
on.gene.LG1.661	E044	NA	NA	NA	NA	NA	NA	NA	NA	NA	NA	NA	0.0101675	0.0271535	NA	NA
on.gene.LG1.661	E045	NA	NA	NA	NA	NA	NA	NA	NA	NA	NA	NA	0.0239751	0.0260902	NA	NA
on.gene.LG1.661	E046	NA	NA	NA	NA	NA	NA	NA	NA	NA	NA	NA	0.0166531	NA	NA	NA
on.gene.LG1.661	E048	NA	NA	NA	NA	NA	NA	NA	NA	NA	NA	NA	NA	0.0440355	NA	NA
on.gene.LG1.661	E050	NA	NA	NA	NA	NA	NA	0.0249231	NA	NA	NA	NA	0.0306064	0.0033706	NA	NA
on.gene.LG1.661	E053	NA	NA	NA	NA	NA	NA	0.0259172	NA	NA	NA	NA	NA	0.00493005	NA	NA
on.gene.LG1.661	E055	NA	NA	NA	NA	NA	NA	NA	NA	NA	NA	NA	NA	0.0394128	NA	NA
on.gene.LG1.661	E061	NA	NA	NA	NA	NA	NA	0.0338502	NA	NA	NA	NA	NA	0.000237349	NA	NA
on.gene.LG1.661	E062	NA	NA	NA	NA	NA	NA	NA	NA	NA	NA	NA	NA	0.0165104	NA	NA
on.gene.LG1.661	E063	NA	NA	NA	NA	NA	NA	NA	NA	NA	0.0359188	NA	0.00118289	0.0162811	NA	NA
on.gene.LG1.661	E064	NA	NA	NA	NA	NA	NA	NA	NA	NA	0.00401924	NA	0.00339656	0.000126347	NA	NA
on.gene.LG1.661	E065	NA	NA	NA	NA	NA	NA	0.0487	NA	NA	NA	0.0338256	NA	0.000479023	NA	NA
on.gene.LG1.661	E066	NA	NA	NA	NA	NA	NA	NA	NA	NA	NA	NA	NA	0.000497355	NA	NA
on.gene.LG1.661	E067	NA	NA	NA	NA	NA	NA	NA	NA	NA	NA	NA	NA	0.000445911	NA	NA
on.gene.LG1.661	E068	NA	NA	NA	NA	NA	NA	NA	NA	NA	NA	NA	NA	0.0109704	NA	NA
on.gene.LG1.661	E069	NA	NA	NA	NA	NA	NA	0.0155851	NA	NA	NA	NA	0.0439846	0.0029797	NA	NA
on.gene.LG1.661	E071	NA	NA	NA	NA	NA	NA	NA	NA	NA	NA	NA	NA	0.0327606	NA	NA
on.gene.LG1.661	E072	NA	NA	NA	NA	NA	NA	NA	NA	NA	NA	NA	NA	0.0255838	NA	NA
on.gene.LG1.661	E073	NA	NA	NA	NA	NA	NA	NA	NA	NA	NA	NA	NA	0.0495413	NA	NA
on.gene.LG1.661	E076	NA	NA	NA	NA	NA	NA	0.0223328	NA	NA	NA	NA	NA	0.00291535	NA	NA
on.gene.LG1.661	E077	NA	NA	NA	NA	NA	NA	NA	NA	NA	NA	NA	NA	0.0191477	NA	NA
on.gene.LG1.661	E079	NA	NA	NA	NA	NA	NA	0.00423961	NA	NA	0.00627923	NA	NA	NA	NA	0.0134548
on.gene.LG1.661	E080	NA	NA	NA	NA	NA	NA	0.00839685	NA	NA	0.0382109	NA	0.0394762	0.000524033	NA	NA
on.gene.LG1.661	E081	NA	NA	NA	NA	NA	NA	0.0303655	NA	NA	NA	NA	NA	0.00159915	NA	NA
on.gene.LG1.661	E082	NA	NA	NA	NA	NA	NA	NA	NA	NA	NA	NA	NA	0.0196762	NA	NA
on.gene.LG1.661	E085	NA	NA	NA	NA	NA	NA	0.00316671	NA	NA	NA	NA	NA	0.00834884	NA	NA
on.gene.LG1.661	E086	NA	NA	NA	NA	NA	NA	0.0376731	NA	NA	NA	NA	NA	0.00197718	NA	0.0273967
on.gene.LG1.667	E017	NA	NA	NA	NA	NA	NA	NA	NA	NA	NA	0.0142215	0.0336482	NA	NA	NA
on.gene.LG1.667	E018	NA	NA	NA	NA	NA	NA	NA	NA	NA	NA	0.047749	NA	NA	NA	NA
on.gene.LG1.667	E022	NA	NA	0.00308103	NA	NA	NA	NA	NA	NA	0.00162057	NA	NA	NA	NA	NA
on.gene.LG1.667	E024	NA	0.0311085	NA	NA	NA	NA	0.0103597	NA	NA	0.000216407	NA	NA	NA	NA	NA
on.gene.LG1.667	E025	NA	NA	0.00203796	0.046789	NA	NA	NA	NA	NA	0.000310738	0.0198647	NA	NA	NA	NA
on.gene.LG1.668	E009	NA	NA	NA	NA	0.0262445	NA	NA	NA	NA	NA	NA	0.0159526	NA	NA	NA
on.gene.LG1.67	E001	NA	NA	NA	0.0307383	0.0124258	NA	NA	0.0219046	0.0213915	NA	0.0120828	0.00288166	NA	NA	0.0434457
on.gene.LG1.67	E004	NA	NA	NA	0.0212725	0.00421733	NA	NA	0.0038667	NA	NA	NA	NA	NA	NA	NA
on.gene.LG1.671	E001	NA	NA	NA	NA	NA	NA	NA	NA	NA	NA	NA	0.00417618	NA	NA	NA
on.gene.LG1.671	E002	NA	NA	NA	NA	NA	NA	NA	NA	NA	NA	0.00496228	NA	NA	NA	NA
on.gene.LG1.673	E002	NA	NA	NA	NA	NA	NA	NA	0.0228341	0.035633	NA	NA	NA	NA	NA	NA
on.gene.LG1.673	E003	NA	NA	NA	NA	NA	NA	NA	0.0232311	0.015346	NA	NA	NA	NA	NA	NA
on.gene.LG1.673	E004	NA	NA	NA	NA	NA	NA	0.000486308	NA	0.00390299	NA	NA	NA	NA	NA	NA
on.gene.LG1.673	E005	NA	NA	0.000300078	NA	NA	NA	0.0214278	NA	NA	0.00927626	0.00023743	NA	NA	NA	NA
on.gene.LG1.673	E007	NA	NA	0.0050506	NA	NA	NA	NA	NA	NA	0.0138505	NA	NA	NA	NA	NA
on.gene.LG1.673	E008	NA	NA	0.000429989	NA	NA	NA	0.00025946	NA	NA	NA	NA	NA	NA	NA	NA
on.gene.LG1.673	E009	NA	0.0248956	NA	NA	NA	NA	NA	0.0328009	0.00464475	0.000684385	NA	NA	0.000149196	NA	NA
on.gene.LG1.673	E010	NA	NA	0.000256415	NA	NA	NA	0.000130088	NA	NA	0.00324374	NA	NA	0.000870905	NA	NA
on.gene.LG1.673	E011	NA	0.00606344	NA	NA	NA	NA	0.0122083	0.00536635	NA	NA	NA	NA	0.0117982	NA	NA
on.gene.LG1.673	E012	NA	NA	NA	NA	NA	NA	NA	NA	NA	NA	0.0162615	NA	NA	NA	NA
on.gene.LG1.675	E006	NA	NA	NA	NA	0.00144261	NA	NA	NA	NA	0.00190902	NA	NA	NA	NA	NA
on.gene.LG1.675	E007	NA	NA	NA	NA	0.0167966	NA	NA	NA	NA	NA	0.00953832	NA	0.00370456	NA	NA
on.gene.LG1.675	E013	NA	NA	NA	NA	NA	NA	NA	NA	NA	0.00639954	0.0276711	0.0118824	0.041405	NA	NA
on.gene.LG1.675	E014	NA	NA	NA	NA	0.00379385	NA	NA	NA	NA	NA	NA	0.00165094	0.0328126	NA	NA
on.gene.LG1.675	E015	NA	0.00110934	NA	NA	0.0122846	NA	NA	NA	NA	NA	NA	0.0190316	NA	NA	0.0281286
on.gene.LG1.675	E020	NA	NA	NA	NA	0.0286374	NA	NA	NA	NA	NA	0.0420939	0.0101944	NA	NA	NA
on.gene.LG1.675	E021	NA	NA	NA	NA	0.010667	NA	NA	NA	NA	NA	NA	0.0387432	NA	NA	NA
on.gene.LG1.675	E022	NA	NA	NA	NA	NA	NA	NA	NA	NA	NA	0.0231403	NA	NA	NA	NA
on.gene.LG1.675	E023	NA	NA	NA	NA	NA	NA	NA	NA	NA	NA	NA	NA	0.000761415	NA	NA
on.gene.LG1.677	E011	NA	NA	NA	NA	NA	NA	NA	0.0362558	NA	NA	NA	NA	NA	NA	NA
on.gene.LG1.678	E003	NA	NA	0.0407997	NA	NA	NA	NA	NA	NA	NA	NA	NA	NA	NA	NA
on.gene.LG1.678	E005	NA	NA	NA	NA	NA	NA	NA	NA	NA	0.0279255	NA	0.0223109	NA	NA	NA
on.gene.LG1.678	E010	NA	0.00120399	NA	NA	NA	NA	NA	NA	NA	NA	0.0245396	NA	NA	NA	NA
on.gene.LG1.678	E011	NA	NA	NA	NA	0.012822	NA	NA	0.00477871	0.0167375	NA	0.040177	0.000966516	NA	NA	NA
on.gene.LG1.678	E016	NA	NA	NA	NA	NA	NA	NA	NA	NA	NA	0.00263423	NA	NA	NA	NA
on.gene.LG1.678	E017	NA	NA	NA	NA	NA	NA	NA	NA	NA	NA	0.000121309	NA	NA	NA	NA
on.gene.LG1.678	E018	NA	NA	NA	NA	NA	NA	NA	NA	NA	NA	0.000744835	NA	NA	NA	NA
on.gene.LG1.678	E020	NA	NA	NA	NA	NA	NA	NA	NA	NA	NA	NA	NA	0.0250779	NA	NA
on.gene.LG1.679	E005	NA	NA	NA	NA	NA	NA	NA	NA	NA	NA	NA	NA	0.015865	NA	NA
on.gene.LG1.679	E007	NA	0.0401451	NA	NA	NA	NA	NA	NA	NA	NA	NA	NA	0.00496559	NA	0.00133253
on.gene.LG1.679	E018	NA	0.00107712	NA	0.0164502	NA	NA	NA	NA	NA	NA	NA	0.0150359	NA	NA	NA
on.gene.LG1.68	E001	NA	NA	NA	NA	NA	NA	NA	NA	NA	NA	0.0359302	NA	NA	NA	0.0160524
on.gene.LG1.68	E005	NA	NA	NA	NA	NA	NA	NA	NA	NA	NA	0.0226561	NA	NA	NA	0.00937656
on.gene.LG1.682	E005	NA	0.00860284	NA	NA	NA	NA	NA	NA	NA	NA	NA	0.0255431	NA	NA	NA
on.gene.LG1.682	E006	NA	0.000634047	NA	NA	0.0442094	NA	NA	0.0282427	0.0427573	NA	NA	0.00608808	NA	NA	NA
on.gene.LG1.682	E007	NA	0.012536	NA	NA	NA	NA	NA	NA	NA	NA	NA	NA	NA	NA	NA
on.gene.LG1.682	E016	NA	NA	NA	0.0213871	NA	NA	NA	NA	0.00725364	NA	0.00102754	NA	NA	NA	NA
on.gene.LG1.682	E017	NA	0.00557269	NA	NA	NA	NA	NA	NA	NA	NA	NA	NA	NA	NA	0.00723775
on.gene.LG1.684	E001	NA	0.000505419	NA	NA	NA	NA	NA	NA	NA	NA	NA	NA	NA	NA	NA
on.gene.LG1.684	E010	NA	NA	NA	NA	NA	NA	NA	NA	NA	NA	0.0282234	NA	NA	NA	NA
on.gene.LG1.684	E011	NA	NA	NA	NA	NA	NA	NA	NA	NA	NA	0.00673153	NA	NA	NA	NA
on.gene.LG1.685	E006	NA	NA	NA	NA	NA	NA	NA	NA	NA	NA	0.00163387	NA	NA	NA	NA
on.gene.LG1.685	E009	NA	NA	NA	NA	NA	NA	NA	NA	NA	NA	0.0273738	NA	NA	NA	0.0338164
on.gene.LG1.685	E012	NA	0.0136408	NA	NA	NA	NA	NA	NA	NA	NA	NA	NA	NA	NA	NA
on.gene.LG1.685	E016	NA	NA	NA	NA	NA	NA	NA	NA	NA	NA	NA	0.0396264	NA	NA	NA
on.gene.LG1.685	E028	NA	NA	NA	NA	NA	NA	NA	0.0114582	NA	0.0328652	NA	NA	NA	NA	NA
on.gene.LG1.685	E029	NA	NA	NA	0.0289642	NA	NA	NA	0.0251212	NA	0.000313386	0.000798295	NA	NA	NA	NA
on.gene.LG1.685	E030	NA	0.0114883	NA	0.00729959	NA	NA	NA	0.00920236	NA	0.00021139	0.000128979	NA	0.0378768	NA	NA
on.gene.LG1.686	E004	NA	NA	NA	NA	NA	NA	0.0403581	NA	NA	NA	NA	NA	NA	NA	NA
on.gene.LG1.686	E005	NA	NA	NA	NA	NA	NA	NA	NA	NA	NA	NA	NA	0.0305817	NA	NA
on.gene.LG1.686	E008	NA	NA	NA	NA	0.0241652	NA	NA	NA	NA	NA	NA	NA	NA	NA	NA
on.gene.LG1.686	E011	NA	NA	NA	NA	NA	NA	NA	NA	0.0175938	NA	NA	0.0254816	NA	NA	NA
on.gene.LG1.687	E001	NA	0.0265374	NA	NA	NA	NA	NA	NA	NA	NA	NA	0.00396683	NA	NA	NA
on.gene.LG1.687	E002	NA	0.0128796	NA	NA	NA	NA	NA	NA	NA	NA	NA	NA	NA	NA	NA
on.gene.LG1.688	E007	NA	NA	NA	NA	NA	NA	NA	NA	NA	NA	0.00676034	NA	0.000410701	NA	NA
on.gene.LG1.690	E001	NA	NA	NA	NA	NA	NA	NA	NA	NA	NA	NA	0.00640998	NA	NA	NA
on.gene.LG1.690	E002	NA	NA	NA	NA	NA	NA	NA	NA	NA	NA	NA	0.0255999	NA	NA	NA
on.gene.LG1.690	E006	NA	0.0495551	NA	NA	NA	NA	NA	NA	NA	NA	NA	NA	NA	NA	NA
on.gene.LG1.690	E009	NA	NA	NA	NA	NA	NA	0.00244947	NA	NA	NA	NA	NA	0.00234089	NA	NA
on.gene.LG1.690	E012	NA	0.0347337	NA	NA	NA	NA	NA	NA	NA	NA	NA	0.00738467	NA	NA	NA
on.gene.LG1.690	E014	NA	0.0068648	NA	NA	NA	NA	NA	0.0352255	0.0141701	NA	NA	NA	NA	NA	NA
on.gene.LG1.690	E019	NA	0.00120028	NA	NA	NA	NA	0.0480686	0.00871788	NA	NA	NA	0.00189469	NA	NA	NA
on.gene.LG1.690	E020	NA	0.000144776	NA	NA	NA	NA	NA	0.000749533	0.000247208	NA	NA	NA	NA	NA	NA
on.gene.LG1.690	E026	NA	NA	NA	NA	NA	NA	NA	NA	NA	NA	NA	NA	0.0417697	NA	NA
on.gene.LG1.690	E029	NA	0.0125683	NA	NA	NA	NA	NA	NA	NA	NA	NA	NA	NA	NA	NA
on.gene.LG1.692	E001	NA	0.00449266	NA	NA	NA	NA	0.0147009	NA	NA	NA	NA	NA	0.00521786	NA	NA
on.gene.LG1.692	E002	NA	0.00473874	NA	0.00131549	NA	NA	NA	NA	NA	NA	0.000658259	NA	NA	NA	NA
on.gene.LG1.692	E008	NA	NA	NA	0.0263194	0.00139393	NA	0.00945198	NA	NA	NA	0.0149201	0.000316376	0.00282576	NA	NA
on.gene.LG1.692	E009	NA	NA	NA	NA	NA	NA	NA	NA	NA	NA	NA	0.0143358	0.00975402	NA	NA
on.gene.LG1.692	E014	NA	NA	NA	NA	NA	NA	NA	NA	NA	NA	NA	0.0373807	NA	NA	NA
on.gene.LG1.692	E015	NA	NA	NA	NA	NA	NA	NA	NA	NA	NA	NA	0.00219228	NA	NA	NA
on.gene.LG1.692	E016	NA	0.00997347	NA	0.0266348	NA	NA	NA	NA	NA	NA	NA	NA	NA	NA	NA
on.gene.LG1.694	E001	NA	NA	0.0107472	0.000149989	0.00545619	NA	0.000395954	NA	NA	0.00734887	NA	0.00153258	NA	NA	NA
on.gene.LG1.694	E003	NA	NA	0.0129228	0.000588456	0.00510977	NA	0.000967525	NA	NA	NA	0.00237536	0.0163491	0.00261831	NA	NA
on.gene.LG1.694	E005	NA	NA	NA	0.0357556	0.0459644	NA	NA	NA	NA	NA	0.0393129	0.0448449	NA	NA	NA
on.gene.LG1.695	E007	NA	NA	NA	NA	NA	NA	NA	NA	NA	NA	0.0290341	NA	NA	NA	NA
on.gene.LG1.695	E011	NA	NA	NA	NA	NA	NA	NA	NA	0.0355269	NA	NA	NA	NA	NA	NA
on.gene.LG1.695	E012	NA	NA	NA	NA	NA	NA	NA	NA	NA	NA	NA	NA	0.0301743	NA	NA
on.gene.LG1.7	E012	NA	NA	NA	NA	NA	NA	NA	NA	NA	NA	0.0343267	NA	NA	NA	NA
on.gene.LG1.7	E014	NA	NA	NA	NA	NA	NA	NA	NA	NA	NA	NA	NA	0.0424218	NA	NA
on.gene.LG1.7	E015	NA	NA	NA	NA	NA	NA	NA	NA	NA	NA	NA	NA	0.0112276	NA	NA
on.gene.LG1.70	E002	0.00782545	0.0171861	NA	NA	NA	NA	NA	NA	NA	0.0255463	NA	0.000137588	NA	NA	NA
on.gene.LG1.70	E003	NA	NA	NA	NA	NA	NA	NA	NA	NA	NA	0.04788	NA	NA	NA	NA
on.gene.LG1.70	E006	NA	NA	NA	NA	NA	NA	NA	NA	NA	0.00658523	0.00438268	NA	NA	NA	NA
on.gene.LG1.70	E007	NA	NA	NA	NA	NA	NA	NA	NA	NA	0.0140369	0.00363112	0.00802606	NA	NA	NA
on.gene.LG1.70	E008	NA	NA	NA	NA	NA	NA	NA	NA	NA	NA	0.011266	0.00317622	NA	NA	NA
on.gene.LG1.70	E009	NA	NA	NA	NA	NA	NA	NA	NA	NA	0.00117122	0.00105441	0.0232766	NA	NA	NA
on.gene.LG1.70	E010	NA	NA	NA	NA	NA	NA	NA	NA	NA	0.0215595	0.0138794	0.0387432	NA	NA	NA
on.gene.LG1.70	E011	NA	NA	NA	NA	NA	NA	NA	NA	0.042382	NA	NA	0.0170526	NA	NA	NA
on.gene.LG1.704	E001	NA	NA	NA	NA	0.00164421	NA	0.0216627	NA	NA	0.000127966	NA	0.000872755	NA	NA	NA
on.gene.LG1.704	E002	NA	NA	NA	0.0082701	NA	NA	NA	0.000246694	0.00330659	0.0209411	NA	NA	NA	NA	NA
on.gene.LG1.704	E003	NA	NA	NA	NA	NA	NA	NA	NA	0.00756692	NA	NA	0.00254196	NA	NA	NA
on.gene.LG1.704	E004	NA	NA	NA	NA	0.000339679	NA	NA	0.00674196	0.00132801	NA	NA	NA	NA	NA	NA
on.gene.LG1.704	E005	NA	0.0345645	NA	NA	NA	NA	NA	NA	NA	NA	NA	NA	NA	NA	NA
on.gene.LG1.704	E006	NA	0.00222575	0.000407093	NA	0.00819291	NA	0.0112799	NA	NA	NA	NA	NA	NA	NA	NA
on.gene.LG1.705	E001	NA	NA	NA	NA	NA	NA	0.00421711	NA	NA	0.0162653	NA	NA	NA	NA	NA
on.gene.LG1.705	E002	NA	NA	NA	0.00012608	NA	NA	0.00389711	NA	NA	NA	NA	NA	0.000510966	NA	NA
on.gene.LG1.705	E004	NA	NA	NA	NA	0.0111774	NA	NA	NA	NA	NA	0.00300193	0.000166229	0.0474004	NA	NA
on.gene.LG1.705	E005	NA	NA	0.0155617	NA	NA	NA	0.000812177	NA	NA	0.0071069	NA	NA	NA	NA	NA
on.gene.LG1.7050001	E001	NA	NA	0.0168242	0.0387671	NA	NA	0.00969953	NA	NA	0.000507379	0.00129746	NA	0.000583726	NA	NA
on.gene.LG1.71	E004	NA	NA	NA	NA	NA	NA	NA	NA	NA	NA	NA	0.0199289	NA	NA	NA
on.gene.LG1.71	E005	NA	NA	NA	NA	NA	NA	NA	NA	NA	NA	0.0123369	0.00366061	NA	NA	NA
on.gene.LG1.710	E001	NA	NA	NA	NA	NA	NA	NA	0.0423776	0.00464475	NA	NA	NA	NA	NA	NA
on.gene.LG1.710	E002	NA	0.0272832	NA	NA	NA	NA	0.0394386	NA	NA	0.00115194	NA	NA	NA	NA	NA
on.gene.LG1.710	E003	NA	0.000221139	NA	NA	NA	NA	NA	NA	NA	NA	NA	NA	0.000266512	NA	0.00571077
on.gene.LG1.710	E004	NA	NA	NA	0.0411272	NA	NA	NA	NA	NA	NA	0.0099121	0.0225449	NA	NA	NA
on.gene.LG1.710	E005	NA	NA	NA	NA	NA	NA	NA	NA	NA	NA	NA	NA	NA	NA	0.00113181
on.gene.LG1.710	E006	NA	NA	NA	NA	NA	NA	0.00333164	NA	NA	NA	NA	NA	0.0185384	NA	NA
on.gene.LG1.710	E007	NA	NA	0.00617633	0.000303085	NA	NA	0.0403811	NA	NA	NA	0.00901925	NA	NA	NA	NA
on.gene.LG1.715	E004	NA	0.0254357	NA	NA	0.022353	NA	NA	NA	NA	NA	NA	0.0276874	NA	NA	NA
on.gene.LG1.715	E006	NA	NA	NA	NA	NA	NA	NA	NA	NA	NA	NA	NA	0.0268199	NA	NA
on.gene.LG1.716	E019	NA	NA	NA	NA	0.0424909	NA	NA	NA	0.00389519	NA	NA	NA	NA	NA	0.0365366
on.gene.LG1.720	E001	NA	0.037734	NA	NA	NA	NA	NA	NA	NA	NA	NA	NA	NA	NA	NA
on.gene.LG1.720	E002	NA	NA	NA	NA	0.0477732	NA	NA	NA	NA	NA	NA	0.0243367	NA	NA	NA
on.gene.LG1.720	E003	NA	NA	NA	NA	NA	NA	NA	NA	NA	0.0408992	NA	NA	NA	NA	NA
on.gene.LG1.720	E008	NA	NA	NA	NA	0.0449092	NA	NA	NA	NA	NA	NA	NA	NA	NA	NA
on.gene.LG1.720	E013	NA	NA	NA	NA	NA	NA	NA	NA	NA	0.0448034	NA	NA	NA	NA	NA
on.gene.LG1.720	E014	NA	NA	NA	NA	NA	NA	NA	NA	NA	0.0318326	0.0413403	NA	NA	NA	NA
on.gene.LG1.720	E018	NA	NA	NA	NA	NA	NA	NA	NA	NA	NA	0.0431408	NA	NA	NA	NA
on.gene.LG1.723	E005	NA	NA	NA	NA	NA	NA	NA	NA	NA	NA	NA	0.0397861	NA	NA	NA
on.gene.LG1.724	E001	NA	NA	NA	NA	NA	NA	NA	NA	0.0128654	NA	NA	NA	NA	NA	0.000611012
on.gene.LG1.724	E005	NA	NA	NA	NA	NA	NA	NA	NA	NA	NA	NA	0.0282362	NA	NA	NA
on.gene.LG1.727	E001	NA	NA	NA	NA	NA	NA	NA	NA	0.0411029	NA	NA	0.0226333	NA	NA	NA
on.gene.LG1.727	E002	NA	NA	NA	NA	0.000388606	NA	NA	NA	NA	NA	NA	NA	NA	NA	0.0227054
on.gene.LG1.727	E003	NA	0.00190966	NA	NA	NA	NA	NA	NA	NA	NA	NA	NA	NA	NA	NA
on.gene.LG1.727	E004	NA	NA	NA	NA	NA	NA	NA	0.00815562	0.00771012	NA	NA	NA	NA	NA	NA
on.gene.LG1.727	E007	NA	NA	0.0196013	NA	NA	NA	NA	NA	NA	NA	NA	NA	NA	NA	NA
on.gene.LG1.727	E009	NA	NA	0.00879938	NA	NA	NA	NA	NA	NA	0.00130689	NA	0.0298052	0.00898232	NA	NA
on.gene.LG1.727	E010	NA	NA	0.000577198	NA	NA	NA	0.00336214	NA	NA	NA	NA	0.0442594	NA	NA	NA
on.gene.LG1.727	E011	NA	0.043315	NA	NA	NA	NA	NA	NA	NA	0.0323614	NA	NA	0.0123663	NA	NA
on.gene.LG1.727	E012	NA	NA	0.0234818	NA	NA	NA	NA	NA	NA	NA	NA	NA	NA	NA	NA
on.gene.LG1.727	E013	NA	NA	0.0102048	0.0213883	NA	NA	NA	NA	NA	NA	NA	NA	NA	NA	NA
on.gene.LG1.727	E014	NA	NA	NA	NA	NA	NA	0.00867474	NA	NA	0.0479434	0.00238616	NA	NA	NA	NA
on.gene.LG1.727	E015	NA	NA	NA	0.000116965	NA	NA	NA	NA	NA	NA	0.00714246	NA	NA	NA	NA
on.gene.LG1.728	E001	NA	NA	NA	NA	NA	NA	NA	NA	NA	NA	NA	NA	NA	NA	0.0390163
on.gene.LG1.728	E003	NA	0.0462676	NA	0.0302884	NA	NA	NA	NA	NA	NA	NA	NA	NA	NA	NA
on.gene.LG1.728	E011	NA	NA	NA	0.0391144	NA	NA	NA	NA	NA	NA	NA	NA	NA	NA	NA
on.gene.LG1.73	E004	NA	NA	NA	NA	NA	NA	NA	NA	NA	NA	NA	0.00853095	NA	NA	NA
on.gene.LG1.73	E005	NA	NA	NA	NA	NA	NA	NA	NA	NA	NA	0.0172112	0.0186201	0.000748152	NA	NA
on.gene.LG1.73	E008	NA	NA	NA	NA	NA	NA	NA	NA	NA	NA	NA	0.00105974	0.000745215	NA	NA
on.gene.LG1.731	E010	NA	NA	NA	NA	NA	NA	NA	NA	NA	NA	NA	0.0030563	NA	NA	NA
on.gene.LG1.732	E001	NA	NA	NA	NA	NA	NA	NA	NA	NA	NA	0.0434142	NA	NA	NA	NA
on.gene.LG1.732	E002	NA	NA	NA	NA	0.0251479	NA	NA	NA	NA	NA	NA	0.0262955	NA	NA	NA
on.gene.LG1.732	E003	NA	NA	NA	NA	0.000897579	NA	NA	0.000262509	NA	NA	0.042958	0.00181594	NA	NA	NA
on.gene.LG1.732	E005	NA	NA	NA	NA	NA	NA	NA	NA	NA	NA	0.00627058	0.0160634	0.00223983	NA	NA
on.gene.LG1.732	E006	NA	NA	NA	NA	NA	NA	0.0230744	NA	NA	0.00335145	0.00013902	0.0361484	NA	NA	NA
on.gene.LG1.732	E007	NA	0.00525616	NA	NA	NA	NA	NA	0.00234274	0.021613	NA	NA	NA	NA	NA	NA
on.gene.LG1.732	E008	NA	NA	NA	NA	0.0296081	NA	NA	NA	NA	NA	NA	0.00187605	NA	NA	NA
on.gene.LG1.732	E009	NA	0.0114992	NA	NA	NA	NA	NA	NA	0.00382341	NA	0.0399957	NA	0.00746181	NA	NA
on.gene.LG1.732	E010	NA	NA	NA	NA	0.00295829	NA	NA	NA	NA	0.00201898	NA	NA	NA	NA	NA
on.gene.LG1.734	E001	NA	NA	NA	NA	0.0106785	NA	NA	NA	NA	NA	NA	0.00387125	NA	NA	NA
on.gene.LG1.734	E003	NA	NA	NA	NA	NA	NA	NA	NA	NA	NA	NA	0.0417761	NA	NA	NA
on.gene.LG1.734	E004	NA	0.00339254	NA	NA	0.00292626	NA	NA	NA	0.0187605	NA	NA	NA	NA	NA	NA
on.gene.LG1.734	E011	NA	NA	NA	NA	0.00640493	NA	NA	NA	NA	NA	NA	0.00231243	NA	NA	NA
on.gene.LG1.734	E012	NA	NA	NA	NA	0.000226436	NA	NA	0.0385421	0.00327317	NA	0.0410764	NA	NA	NA	NA
on.gene.LG1.734	E020	NA	NA	NA	NA	NA	NA	NA	NA	NA	0.047763	NA	NA	NA	NA	NA
on.gene.LG1.734	E021	NA	NA	NA	NA	0.0382349	NA	NA	NA	NA	NA	NA	NA	NA	NA	NA
on.gene.LG1.734	E023	NA	NA	NA	NA	0.0352811	NA	NA	NA	NA	NA	NA	0.00535177	NA	NA	NA
on.gene.LG1.734	E025	NA	0.0395233	NA	NA	NA	NA	NA	NA	0.0386806	NA	NA	0.0208005	NA	NA	NA
on.gene.LG1.734	E026	NA	0.0128758	NA	NA	NA	NA	NA	NA	NA	NA	NA	0.0130244	NA	NA	NA
on.gene.LG1.735	E003	NA	NA	NA	0.0197397	NA	NA	NA	NA	NA	NA	NA	NA	NA	NA	NA
on.gene.LG1.738	E002	NA	0.0494255	NA	NA	NA	NA	NA	NA	NA	NA	NA	NA	NA	NA	NA
on.gene.LG1.738	E012	NA	0.0237162	NA	NA	NA	NA	NA	NA	0.0314034	NA	NA	0.00118289	NA	NA	NA
on.gene.LG1.738	E013	NA	0.0237698	NA	NA	NA	NA	NA	0.0172044	NA	NA	NA	0.0418956	NA	NA	NA
on.gene.LG1.739	E001	NA	0.0144667	NA	NA	NA	NA	NA	0.0168809	NA	NA	NA	0.0150784	NA	NA	NA
on.gene.LG1.739	E002	NA	NA	NA	NA	NA	NA	NA	0.00656538	NA	NA	NA	0.00584209	0.00179129	0.00397837	NA
on.gene.LG1.739	E003	NA	NA	NA	NA	NA	NA	0.00960856	NA	0.0306539	NA	0.0450668	NA	0.00227428	0.00255363	NA
on.gene.LG1.739	E004	NA	NA	NA	0.00431485	0.0242302	NA	NA	NA	NA	0.00599146	NA	0.000221036	0.00427716	NA	NA
on.gene.LG1.739	E005	NA	0.00395144	0.00215599	0.000121338	NA	NA	0.0128065	0.00778057	0.00121358	0.00109242	NA	NA	0.00413675	NA	NA
on.gene.LG1.739	E006	NA	0.00367518	NA	NA	NA	NA	0.000339327	0.0306429	NA	NA	NA	NA	NA	NA	NA
on.gene.LG1.739	E007	NA	NA	0.00114534	0.0269825	NA	NA	NA	NA	NA	0.0385009	NA	NA	NA	0.0199134	NA
on.gene.LG1.739	E008	NA	NA	NA	0.000270281	NA	NA	0.0225883	NA	0.0223731	NA	0.0177922	NA	NA	NA	NA
on.gene.LG1.740	E001	NA	0.0363843	0.000280571	NA	NA	NA	NA	NA	NA	NA	NA	0.00482448	NA	NA	0.0047196
on.gene.LG1.740	E002	NA	NA	0.0369438	0.000425584	NA	NA	NA	NA	NA	0.00997608	NA	0.0271331	NA	NA	0.0151495
on.gene.LG1.740	E003	NA	NA	NA	0.0222867	NA	NA	NA	NA	NA	NA	NA	NA	NA	NA	NA
on.gene.LG1.740	E006	NA	NA	NA	NA	NA	NA	0.00232937	NA	NA	NA	NA	NA	0.00037399	NA	NA
on.gene.LG1.740	E007	NA	NA	NA	NA	0.000184345	NA	NA	NA	0.0155702	NA	NA	NA	NA	NA	NA
on.gene.LG1.740	E008	NA	NA	NA	NA	NA	NA	NA	NA	NA	NA	NA	NA	0.0266622	NA	NA
on.gene.LG1.740	E009	NA	0.00531565	NA	NA	NA	NA	NA	NA	NA	NA	NA	0.000287924	NA	NA	NA
on.gene.LG1.740	E010	NA	0.00410841	NA	NA	0.0267254	NA	NA	NA	NA	0.040496	NA	NA	0.000717731	NA	NA
on.gene.LG1.740	E011	NA	0.0131683	0.00438564	NA	0.000189485	NA	0.0309984	NA	NA	NA	0.00230962	NA	NA	NA	NA
on.gene.LG1.740	E012	NA	NA	0.00816839	0.0129956	NA	NA	0.00591785	NA	NA	0.000425035	0.000346214	NA	0.000121087	NA	NA
on.gene.LG1.740	E013	NA	NA	NA	0.0234596	0.0457727	NA	NA	NA	NA	NA	0.00595164	0.018596	NA	NA	NA
on.gene.LG1.740	E017	NA	0.0193748	NA	NA	NA	NA	NA	NA	NA	NA	NA	0.0149798	0.0126145	NA	0.0218386
on.gene.LG1.740	E018	NA	0.00396808	NA	NA	NA	NA	NA	NA	NA	NA	NA	0.0349053	NA	NA	NA
on.gene.LG1.740	E019	NA	0.00811762	NA	NA	NA	NA	NA	NA	NA	NA	NA	NA	NA	NA	NA
on.gene.LG1.740	E020	NA	0.00127536	NA	NA	0.00202022	NA	NA	0.0421438	NA	NA	NA	NA	0.00119118	NA	NA
on.gene.LG1.740	E021	NA	NA	NA	NA	NA	NA	0.00784106	0.0450729	NA	0.00102592	NA	NA	NA	NA	0.0303285
on.gene.LG1.740	E022	NA	NA	NA	NA	0.00607392	NA	NA	NA	NA	0.0290062	NA	NA	NA	NA	0.00372743
on.gene.LG1.740	E023	NA	0.00245058	NA	0.00130664	NA	NA	NA	NA	NA	NA	NA	NA	0.0308849	NA	0.00112717
on.gene.LG1.740	E024	NA	0.00032383	NA	NA	NA	NA	NA	NA	NA	NA	NA	0.00549571	NA	NA	0.016673
on.gene.LG1.743	E001	NA	NA	NA	NA	0.0365597	NA	NA	NA	NA	NA	NA	NA	NA	NA	NA
on.gene.LG1.743	E002	NA	NA	NA	NA	0.0366427	NA	NA	NA	NA	NA	NA	NA	NA	NA	NA
on.gene.LG1.744	E001	NA	NA	NA	NA	NA	NA	NA	NA	NA	0.0307572	0.00081555	NA	NA	NA	NA
on.gene.LG1.744	E005	NA	NA	NA	NA	NA	NA	NA	NA	NA	0.0110811	0.0354707	0.00127809	NA	NA	NA
on.gene.LG1.746	E008	NA	NA	NA	NA	NA	NA	NA	NA	NA	NA	NA	0.0374353	NA	NA	NA
on.gene.LG1.746	E015	NA	NA	NA	NA	NA	NA	NA	NA	0.0258636	NA	NA	NA	NA	NA	NA
on.gene.LG1.747	E001	NA	NA	NA	0.04413	NA	NA	NA	NA	NA	NA	NA	NA	NA	NA	NA
on.gene.LG1.747	E004	NA	NA	NA	NA	NA	NA	NA	NA	NA	NA	0.0417618	NA	0.0280632	NA	NA
on.gene.LG1.75	E001	0.0486107	NA	NA	NA	0.0332805	NA	NA	NA	NA	NA	0.000628821	NA	NA	NA	0.0101252
on.gene.LG1.75	E002	0.00745487	NA	0.000123661	NA	0.00663923	NA	0.00256788	NA	NA	0.000750993	NA	0.016929	0.00581836	NA	0.000229969
on.gene.LG1.75	E004	NA	0.00460456	NA	NA	NA	NA	NA	NA	NA	NA	NA	NA	NA	NA	NA
on.gene.LG1.75	E005	NA	NA	NA	NA	0.0180271	NA	NA	0.0111205	NA	0.0304379	0.000466868	NA	NA	NA	NA
on.gene.LG1.75	E006	NA	NA	NA	NA	0.000137399	NA	NA	NA	0.0171353	0.00522227	0.000383968	NA	NA	NA	NA
on.gene.LG1.75	E008	NA	0.0329464	NA	0.00198808	NA	NA	NA	NA	NA	NA	0.00121838	NA	NA	NA	NA
on.gene.LG1.75	E009	NA	0.000406881	0.000350445	NA	0.0115056	NA	0.0126523	NA	NA	0.00346553	NA	0.0430612	0.0377999	NA	0.00479401
on.gene.LG1.75	E010	0.0139366	NA	NA	NA	NA	NA	NA	NA	NA	NA	NA	NA	NA	NA	0.00340618
on.gene.LG1.752	E029	NA	NA	NA	NA	NA	NA	NA	NA	NA	NA	NA	NA	0.0407667	0.0478563	NA
on.gene.LG1.752	E051	NA	NA	NA	NA	NA	NA	0.0293708	NA	NA	NA	NA	NA	0.00385598	0.0412667	NA
on.gene.LG1.77	E001	NA	NA	NA	0.0430139	NA	NA	NA	NA	NA	NA	0.0117122	NA	NA	NA	0.0278551
on.gene.LG1.78	E009	NA	NA	NA	0.0264949	NA	NA	NA	NA	NA	NA	NA	NA	NA	NA	NA
on.gene.LG1.78	E011	NA	NA	NA	NA	NA	NA	NA	0.0388397	NA	NA	NA	0.0464853	NA	NA	NA
on.gene.LG1.79	E002	NA	0.0408905	0.0262591	0.000288759	NA	NA	NA	NA	NA	NA	0.022614	NA	NA	NA	NA
on.gene.LG1.79	E004	NA	NA	NA	NA	NA	NA	NA	NA	NA	NA	NA	0.0471043	0.0229045	NA	NA
on.gene.LG1.79	E005	NA	NA	NA	NA	NA	NA	NA	NA	NA	NA	NA	0.0174173	0.00228064	NA	NA
on.gene.LG1.79	E006	NA	NA	NA	0.0266695	NA	NA	NA	NA	NA	NA	NA	NA	NA	NA	NA
on.gene.LG1.79	E007	NA	NA	0.00637347	NA	NA	NA	NA	NA	NA	NA	0.0150063	0.0398481	NA	NA	NA
on.gene.LG1.79	E009	0.0491588	NA	0.0446473	NA	NA	NA	NA	NA	NA	0.000144789	NA	NA	NA	0.00102688	NA
on.gene.LG1.79	E010	NA	NA	NA	NA	0.0116342	NA	NA	0.00122444	0.0016092	NA	NA	0.00274912	NA	NA	NA
on.gene.LG1.79	E012	NA	0.00839335	NA	NA	NA	NA	NA	NA	0.00363959	NA	NA	NA	0.0342644	NA	NA
on.gene.LG1.79	E014	NA	NA	NA	NA	NA	NA	NA	NA	0.0266258	NA	NA	NA	0.0057509	NA	0.0405592
on.gene.LG1.79	E015	NA	NA	NA	NA	0.037626	NA	NA	NA	NA	0.0397861	NA	0.0108929	NA	NA	0.0377913
on.gene.LG1.79	E017	NA	NA	0.0219855	0.0274847	NA	NA	NA	NA	NA	NA	NA	NA	NA	NA	NA
on.gene.LG1.79	E018	NA	NA	0.000123139	0.000126301	0.0397797	NA	NA	NA	NA	0.0444608	0.0250005	NA	NA	NA	NA
on.gene.LG1.79	E020	NA	NA	NA	NA	NA	NA	NA	NA	NA	0.0120643	0.0087951	NA	NA	NA	NA
on.gene.LG1.79	E021	NA	0.00232142	NA	0.00961623	NA	NA	NA	0.0210885	NA	NA	NA	NA	NA	NA	NA
on.gene.LG1.79	E022	NA	NA	NA	NA	0.0458822	NA	NA	NA	NA	NA	NA	0.00488807	NA	NA	NA
on.gene.LG1.80	E001	NA	NA	NA	NA	0.0222071	NA	NA	NA	NA	NA	NA	NA	NA	NA	NA
on.gene.LG1.82	E001	0.00742198	0.00710251	NA	NA	NA	NA	NA	NA	NA	NA	NA	NA	0.000259054	NA	NA
on.gene.LG1.82	E002	NA	NA	NA	0.000101182	0.00927194	NA	NA	NA	0.0393568	NA	NA	0.00265098	NA	NA	0.000477852
on.gene.LG1.82	E004	NA	NA	NA	0.0102732	NA	NA	NA	0.00824458	NA	NA	0.0101628	NA	NA	NA	NA
on.gene.LG1.82	E005	NA	NA	NA	0.0022828	0.00010244	NA	NA	NA	NA	NA	NA	NA	0.00490528	NA	NA
on.gene.LG1.82	E006	NA	NA	NA	NA	0.0443252	NA	NA	NA	NA	NA	0.0366733	0.00016695	0.0159709	NA	NA
on.gene.LG1.82	E009	NA	NA	NA	NA	NA	NA	NA	NA	NA	0.0223906	NA	NA	NA	NA	NA
on.gene.LG1.82	E011	NA	0.0471628	NA	NA	NA	NA	NA	NA	NA	NA	0.0135829	NA	NA	NA	0.00314871
on.gene.LG1.82	E012	NA	0.0480084	NA	NA	NA	NA	NA	NA	NA	NA	NA	NA	NA	NA	NA
on.gene.LG1.83	E001	NA	NA	NA	0.0234072	0.0222941	NA	NA	NA	NA	NA	NA	NA	NA	NA	NA
on.gene.LG1.83	E005	NA	NA	NA	NA	NA	NA	NA	NA	NA	0.0188217	NA	NA	NA	NA	NA
on.gene.LG1.83	E008	NA	NA	NA	NA	NA	NA	NA	NA	NA	0.00704292	NA	0.00196789	NA	NA	NA
on.gene.LG1.83	E009	NA	NA	NA	NA	NA	NA	NA	NA	NA	0.00626256	0.0466028	NA	NA	NA	NA
on.gene.LG1.83	E012	NA	NA	0.0281673	0.000351094	0.0128639	NA	NA	NA	NA	NA	0.0249096	NA	NA	NA	NA
on.gene.LG1.83	E017	NA	NA	NA	NA	NA	NA	NA	NA	NA	NA	NA	0.0387112	NA	NA	NA
on.gene.LG1.85	E001	NA	NA	NA	NA	NA	NA	NA	NA	NA	NA	NA	NA	0.00667818	NA	0.0305848
on.gene.LG1.85	E002	NA	NA	NA	NA	NA	NA	NA	NA	NA	0.0385009	NA	NA	NA	NA	NA
on.gene.LG1.85	E005	NA	NA	NA	NA	NA	NA	0.0196845	NA	NA	0.000732638	NA	0.00683828	0.000563196	NA	NA
on.gene.LG1.85	E006	NA	NA	NA	NA	0.0204606	NA	NA	NA	NA	NA	0.00151828	0.000166917	NA	NA	NA
on.gene.LG1.85	E008	NA	NA	NA	NA	NA	NA	NA	NA	NA	0.00295047	0.0226662	0.000948852	0.00246731	NA	NA
on.gene.LG1.85	E009	NA	NA	0.015486	NA	0.0113386	NA	0.0136982	NA	NA	0.0440903	NA	0.0178774	0.0216702	NA	NA
on.gene.LG1.85	E010	NA	NA	NA	NA	0.0137554	NA	0.027376	NA	NA	NA	NA	0.0070274	0.00981222	NA	NA
on.gene.LG1.85	E011	NA	NA	NA	NA	NA	NA	NA	NA	NA	NA	NA	0.0172166	0.0117729	NA	NA
on.gene.LG1.85	E012	NA	NA	NA	NA	NA	NA	NA	NA	NA	NA	NA	NA	0.00754902	NA	NA
on.gene.LG1.85	E013	NA	NA	NA	NA	0.0453086	NA	0.0152222	NA	NA	NA	NA	0.00489221	0.00037684	NA	NA
on.gene.LG1.85	E014	NA	NA	NA	NA	NA	NA	0.0195978	NA	NA	NA	NA	NA	0.00074801	NA	NA
on.gene.LG1.85	E015	NA	NA	NA	NA	NA	NA	0.000568846	NA	NA	NA	NA	NA	0.000106629	0.0156679	NA
on.gene.LG1.85	E016	NA	NA	NA	NA	NA	NA	NA	NA	NA	NA	NA	NA	0.00198221	NA	NA
on.gene.LG1.85	E018	NA	NA	NA	NA	NA	NA	NA	NA	NA	NA	NA	NA	0.0396139	NA	NA
on.gene.LG1.85	E019	NA	NA	NA	NA	NA	NA	NA	NA	NA	NA	NA	0.0144376	NA	NA	NA
on.gene.LG1.85	E020	NA	NA	NA	NA	NA	NA	NA	NA	NA	NA	NA	0.00637809	NA	NA	NA
on.gene.LG1.85	E021	NA	NA	NA	NA	0.000849909	NA	NA	NA	NA	NA	0.0363949	0.000100679	0.0184317	NA	NA
on.gene.LG1.85	E022	NA	NA	NA	NA	0.0323808	NA	NA	NA	NA	NA	NA	0.00363992	0.00353958	NA	NA
on.gene.LG1.85	E023	NA	NA	NA	NA	NA	NA	0.013783	NA	NA	NA	NA	NA	0.000392227	NA	NA
on.gene.LG1.85	E024	NA	NA	NA	NA	NA	NA	NA	NA	NA	NA	NA	NA	0.0147149	NA	NA
on.gene.LG1.85	E025	NA	0.0133285	NA	NA	0.00332141	NA	0.0234233	0.0438696	NA	NA	NA	0.000437794	0.00162351	NA	NA
on.gene.LG1.85	E026	NA	NA	NA	NA	NA	NA	NA	NA	NA	NA	NA	NA	0.0260071	NA	0.0280989
on.gene.LG1.85	E027	NA	NA	NA	NA	NA	NA	NA	NA	NA	NA	NA	NA	0.0116307	NA	0.0321646
on.gene.LG1.85	E028	NA	NA	NA	NA	NA	NA	0.0152095	NA	NA	NA	NA	NA	0.00139152	NA	NA
on.gene.LG1.85	E029	NA	NA	NA	NA	NA	NA	0.0215519	NA	NA	NA	NA	NA	0.000195223	NA	NA
on.gene.LG1.85	E030	NA	NA	NA	NA	NA	NA	NA	NA	NA	NA	NA	NA	0.0033496	NA	NA
on.gene.LG1.85	E031	NA	NA	NA	NA	NA	NA	NA	NA	NA	NA	NA	NA	0.0228792	NA	NA
on.gene.LG1.85	E032	NA	NA	NA	NA	NA	NA	NA	NA	NA	NA	NA	0.0459683	NA	NA	NA
on.gene.LG1.85	E035	NA	NA	NA	0.00046703	NA	NA	NA	NA	NA	NA	0.0118384	NA	NA	NA	NA
on.gene.LG1.85	E036	NA	NA	NA	0.0126828	0.0432514	NA	NA	NA	NA	NA	NA	NA	NA	NA	NA
on.gene.LG1.85	E037	NA	NA	NA	NA	0.00205484	NA	NA	NA	NA	NA	NA	0.00248751	NA	NA	NA
on.gene.LG1.85	E040	NA	NA	NA	NA	NA	NA	NA	NA	NA	NA	0.00471667	0.0176873	0.000377987	NA	NA
on.gene.LG1.85	E041	NA	NA	NA	NA	NA	NA	NA	NA	NA	NA	NA	0.0383457	0.00638954	NA	NA
on.gene.LG1.85	E047	NA	NA	NA	NA	0.00156331	NA	NA	NA	NA	NA	NA	0.000807962	0.0283088	NA	NA
on.gene.LG1.85	E048	NA	NA	NA	NA	0.0177212	NA	NA	NA	NA	NA	NA	0.00144745	NA	NA	NA
on.gene.LG1.85	E050	NA	NA	NA	NA	0.00177287	NA	NA	NA	NA	NA	0.0365285	0.000281231	NA	NA	NA
on.gene.LG1.85	E051	NA	NA	NA	0.0311057	0.00206161	NA	NA	NA	NA	NA	0.00177016	0.000105171	NA	NA	NA
[truncated: 56,311 more rows]
