# Supplementary material for: The Role of Alternative Splicing and Differential Gene Expression in Cichlid Adaptive Radiation
Source: Oxford University Press journal article supplement (doi:10.1093/gbe/evx204), 2017-09-26
Supplement: supp_file_3_evx204.xlsx [file supp_file_3_evx204.xlsx]

## Sheet: Sheet1
gene_ID	gene_name	description	pathway/network	gene_differentially_expressed?	gene_alternatively_spliced?	previously_implicated_in_cichlid_jaw_phenotypic_plasticity?	previously_implicated_in_cichlid_jaw_development (embryonic_postembryonic_postdevelopmental)?
n.gene.UNK226.1	cimp1	cichlid metalloproteinase 1	-	yes	yes	NA	Kijimoto et al. 2005
on.gene.LG5.5970001	alpl	alkaline phosphatase-like	alkaline phosphatase pathway	yes	yes	NA	Hulsey et al. 2016
on.gene.LG15.644	bmp2	bone morphogenetic protein 2-like	bmp pathway	yes	no	NA	Fraser et al. 2008, 2009, Bloomquist et al. 2015
on.gene.LG4.812	nog	nogging	bmp pathway	yes	no	NA	Bloomquist et al. 2015
on.gene.LG8-24.346	nog2-like	noggin-2-like	bmp pathway	yes	no	NA	Bloomquist et al. 2015
on.gene.LG14.350	bmp16	bone morphogenetic protein 2-like	bmp pathway	yes	yes	NA	NA
on.gene.LG19.197	bmp4	bone morphogenetic protein 4-like	bmp pathway	yes	yes	NA	Terai et al. 2002, Albertson et al. 2005, Parsons & Albertson 2009, Fraser et al. 2009
on.gene.LG12.325	bmp1 (1 of 2)	bone morphogenetic protein 1	bmp pathway	no	yes
on.gene.LG17.437	igf1	insulin-like growth factor 1	bmp pathway	no	yes
on.gene.LG7.731	bmpr1b (2 of 2)	bone morphogenetic protein receptor, type IB	bmp pathway	yes	no
on.gene.LG23.534	glis1	GLIS family zinc finger 1	-	yes	no
on.gene.LG7.547	bmp1 (2 of 2)	bone morphogenetic protein 1	bmp pathway	yes	yes
on.gene.UNK12.23	cacng6 (1 of 2)	voltage-dependent calcium channel gamma-6 subunit-like	cichlid jaw plasticity network	no	no	Gunter et al. 2013	NA
on.gene.LG14.645	cxcr1	c-X-C chemokine receptor type 5-like	cichlid jaw plasticity network	no	no	Gunter et al. 2013	NA
on.gene.LG12.811	hspb1	heat shock protein beta-1-like	cichlid jaw plasticity network	no	no	Gunter et al. 2013	NA
on.mrna.LG6.209	pdlim3-like	PDZ and LIM domain protein 3-like	cichlid jaw plasticity network	no	no	Gunter et al. 2013	NA
on.gene.LG5.838	syt2 (1 of 2)	synaptotagmin-2-like	cichlid jaw plasticity network	no	no	Gunter et al. 2013	NA
on.gene.LG11.544	cacng6 (1 of 2)	voltage-dependent calcium channel gamma-6 subunit-like	cichlid jaw plasticity network	no	yes	Gunter et al. 2013	NA
on.gene.UNK3.50	fhl1(2 of 2)	four and a half LIM domains protein 1-like	cichlid jaw plasticity network	no	yes	Gunter et al. 2013	NA
on.gene.LG10.385	fat3	protocadherin Fat 3-like	cichlid jaw plasticity network	yes	no	Gunter et al. 2013	NA
on.gene.LG2.241	fhl1(1 of 2)	four and a half LIM domains protein 1-like	cichlid jaw plasticity network	yes	no	Gunter et al. 2013	NA
on.gene.UNK2.50	fhl2	four and a half LIM domains protein 2-like	cichlid jaw plasticity network	yes	no	Gunter et al. 2013	NA
on.gene.LG7.262	hapln1	hyaluronan and proteoglycan link protein 1-like	cichlid jaw plasticity network	yes	no	Gunter et al. 2013	NA
on.gene.LG7.1335	kcnj11	ATP-sensitive inward rectifier potassium channel 11-like	cichlid jaw plasticity network	yes	no	Gunter et al. 2013	NA
on.gene.LG2.470	spon2a-like	spondin-2-like	cichlid jaw plasticity network	yes	no	Gunter et al. 2013	NA
on.gene.LG6.3490001	aloxe3-like	epidermis-type lipoxygenase 3-like	cichlid jaw plasticity network	yes	yes	Gunter et al. 2013	NA
on.gene.UNK10.60	aloxe3-like	epidermis-type lipoxygenase 3-like	cichlid jaw plasticity network	yes	yes	Gunter et al. 2013	NA
on.gene.LG6.9700001	ccr7-like	c-C chemokine receptor type 7-like	cichlid jaw plasticity network	yes	yes	Gunter et al. 2013	NA
on.gene.UNK182.2	fat3 (1 of 2)	protocadherin Fat 3-like	cichlid jaw plasticity network	yes	yes	Gunter et al. 2013	NA
on.gene.LG19.204	fhl5	four and a half LIM domains protein 5	cichlid jaw plasticity network	yes	yes	Gunter et al. 2013	NA
on.gene.LG15.372	fndc1 (1 of 2)	fibronectin type III domain-containing protein 1-like	cichlid jaw plasticity network	yes	yes	Gunter et al. 2013	NA
on.gene.LG15.194	gpr126-like	G-protein coupled receptor 126-like	cichlid jaw plasticity network	yes	yes	Gunter et al. 2013	NA
on.gene.LG12.389	hapln1a	hyaluronan and proteoglycan link protein 1-like	cichlid jaw plasticity network	yes	yes	Gunter et al. 2013	NA
on.gene.LG22.599	hspa8 (1 of 2)	heat shock cognate 71 kDa protein-like	cichlid jaw plasticity network	yes	yes	Gunter et al. 2013	NA
on.gene.UNK38.3	hspb1	heat shock protein beta-1-like	cichlid jaw plasticity network	yes	yes	Gunter et al. 2013	NA
on.gene.LG12.810	hspb8	heat shock protein beta-8-like	cichlid jaw plasticity network	yes	yes	Gunter et al. 2013	NA
on.gene.LG15.581	il20ra	interleukin-20 receptor subunit alpha-like	cichlid jaw plasticity network	yes	yes	Gunter et al. 2013	NA
on.gene.LG5.837	mybpH-like	myosin-binding protein H-like	cichlid jaw plasticity network	yes	yes	Gunter et al. 2013	NA
on.gene.LG20.673	pkp1 (1 of 2)	plakophilin-1-like	cichlid jaw plasticity network	yes	yes	Gunter et al. 2013	NA
on.gene.LG5.833	pkp1 (2 of 2)	plakophilin-1-like	cichlid jaw plasticity network	yes	yes	Gunter et al. 2013	NA
on.gene.LG17.467	sema3c	semaphorin-3C-like	cichlid jaw plasticity network	yes	yes	Gunter et al. 2013	Hulsey et al. 2016
on.gene.LG5.769	slmap	sarcolemma associated protein	cichlid jaw plasticity network	yes	yes	Gunter et al. 2013	NA
on.gene.LG2.142	spon2-like	spondin-2-like	cichlid jaw plasticity network	yes	yes	Gunter et al. 2013	NA
on.gene.LG16-21.76	tnfsf11	tumor necrosis factor ligand superfamily member 11-like	cichlid jaw plasticity network	yes	yes	Gunter et al. 2013	NA
on.gene.UNK17.12	usp28	ubiquitin carboxyl-terminal hydrolase 28-like	cichlid jaw plasticity network	yes	yes	Gunter et al. 2013	NA
on.gene.LG7.522	klf4	Krueppel-like factor 4-like	cichlid jaw plasticity network	yes	yes	Gunter et al. 2013, Schneider et al. 2014	NA
on.gene.LG4.3	ier2 (2 of 2)	immediate early response gene 2 protein-like	cichlid jaw plasticity network	no	no	Schneider et al. 2014	NA
on.gene.LG2.563	Anxa6-like	annexin A6-like	cichlid jaw plasticity network/calcium pathway	yes	yes	Gunter et al. 2013, Schneider et al. 2014	NA
on.gene.UNK6.14	srl (1 of 2)	sarcalumenin-like	cichlid jaw plasticity network/calcium pathway	yes	yes	Schneider et al. 2014	NA
on.gene.LG6.666	srl (2 of 2)	sarcalumenin-like	cichlid jaw plasticity network/calcium pathway	yes	yes	Schneider et al. 2014	NA
on.gene.LG18.533	c1q-like	complement C1q-like protein 3-like	cichlid jaw plasticity network/haem related	no	no	Gunter et al. 2013, Schneider et al. 2014	NA
on.gene.UNK33.8	c1q-like	complement C1q-like protein 3-like	cichlid jaw plasticity network/haem related	yes	no	Gunter et al. 2013, Schneider et al. 2014	NA
on.gene.LG16-21.28	c1ql2	complement C1q-like protein 2-like	cichlid jaw plasticity network/haem related	yes	no	Schneider et al. 2014	NA
on.gene.UNK19.22	alas1	5-aminolevulinate synthase, nonspecific, mitochondrial-like	cichlid jaw plasticity network/haem related	yes	yes	Schneider et al. 2014	NA
on.gene.LG18.340	c1q-like	complement C1q-like protein 2-like	cichlid jaw plasticity network/haem related	yes	yes	Schneider et al. 2014	NA
on.gene.LG20.734	c1q-like-4-like-1	complement C1q-like protein 4-like	cichlid jaw plasticity network/haem related	yes	yes	Schneider et al. 2014	NA
on.gene.LG16-21.369	c1ql2	complement C1q-like protein 2-like	cichlid jaw plasticity network/haem related	yes	yes	Schneider et al. 2014	NA
on.gene.LG15.470	c-fos	proto-oncogene c-Fos-like	cichlid jaw plasticity network/immediate early response gene	yes	no	Schneider et al. 2014	NA
on.gene.LG15.471	c-fos	proto-oncogene c-Fos-like	cichlid jaw plasticity network/immediate early response gene	yes	no	Schneider et al. 2014	NA
on.gene.LG19.12	c-fos	proto-oncogene c-Fos-like	cichlid jaw plasticity network/immediate early response gene	yes	no	Schneider et al. 2014	NA
on.gene.LG6.150	ier2 (1 of 2)	immediate early response gene 2 protein-like	cichlid jaw plasticity network/immediate early response gene	yes	no	Schneider et al. 2014	NA
on.gene.UNK16.7	rgs2	regulator of G-protein signaling 2-like	cichlid jaw plasticity network/immediate early response gene	yes	yes	Schneider et al. 2014	NA
on.gene.LG18.83	col6a1	collagen alpha-1(VI) chain-like	cichlid jaw plasticity network/matrix related	yes	yes	Gunter et al. 2013, Schneider et al. 2014	NA
on.gene.LG16-21.605	col6a3	collagen alpha-3(VI) chain-like	cichlid jaw plasticity network/matrix related	yes	yes	Gunter et al. 2013, Schneider et al. 2014	NA
on.gene.LG15.166	col12a1 (2 of 2)	collagen, type XII, alpha 1	cichlid jaw plasticity network/matrix related	yes	yes	Schneider et al. 2014	NA
on.gene.UNK92.1	col6a3	collagen alpha-3(VI) chain-like	cichlid jaw plasticity network/matrix related	yes	yes	Schneider et al. 2014	NA
on.gene.LG11.889	thbs3	thrombospondin-3a-like	cichlid jaw plasticity network/matrix related	yes	yes	Schneider et al. 2014	Parsons et al. 2015
on.gene.LG2.220	des-like	desmin-like	cichlid jaw plasticity network/muscle related	yes	no	Schneider et al. 2014	NA
on.gene.LG16-21.524	des-like	desmin-like	cichlid jaw plasticity network/muscle related	yes	yes	Schneider et al. 2014	NA
on.gene.LG9.304	shh	sonic hedgehog protein A-like	hedgehog pathway	no	no	NA	Fraser et al. 2009
on.gene.LG12.599	ptch1	patched 1	hedgehog pathway	yes	yes	Parsons et al. 2016	Roberts et al. 2011, Hu and Albertson 2014,
on.gene.LG5.958	gli1	GLI family zinc finger 1	hedgehog pathway	yes	yes
on.gene.LG19.525	runx3-like	runt-related transcription factor 3-like	multiple pathways	yes	yes	NA	Hulsey et al. 2016
on.gene.LG15.660	runx2b-like	runt-related transcription factor 3-like	multiple pathways/bone related	yes	no	Schneider et al. 2014	Fraser et al. 2009, 2013
on.gene.LG5.968	sp7	transcription factor Sp7-like aka OSX	multiple signalling pathways/bone related	yes	no	Gunter et al. 2013, Schneider et al. 2014	Hulsey et al. 2016
on.gene.LG20.353	tnnc1	troponin C, slow skeletal and cardiac muscles-like	Muscle contraction and cytoskeleton signalling	yes	no	Gunter et al. 2013	NA
on.gene.LG7.1170	tnni	troponin I, slow skeletal muscle-like	Muscle contraction and cytoskeleton signalling	yes	no	Gunter et al. 2013	NA
on.gene.LG20.676	tnni1	troponin I, slow skeletal muscle-like	Muscle contraction and cytoskeleton signalling	yes	no	Gunter et al. 2013	NA
on.gene.LG20.511	tnnc1b	troponin C, slow skeletal and cardiac muscles-like	Muscle contraction and cytoskeleton signalling	yes	yes	Gunter et al. 2013	NA
on.gene.LG20.552	tnnc2	troponin C, skeletal muscle-like	Muscle contraction and cytoskeleton signalling	yes	yes	Gunter et al. 2013	NA
on.gene.LG20.553	tnnc2	troponin C, skeletal muscle-like	Muscle contraction and cytoskeleton signalling	yes	yes	Gunter et al. 2013	NA
on.gene.LG13.838	tnni	troponin I, slow skeletal muscle-like	Muscle contraction and cytoskeleton signalling	yes	yes	Gunter et al. 2013	NA
on.gene.LG17.547	tnni-like	troponin I, slow skeletal muscle-like	Muscle contraction and cytoskeleton signalling	yes	yes	Gunter et al. 2013	NA
on.gene.LG13.839	tnni1al	troponin I, slow skeletal muscle-like	Muscle contraction and cytoskeleton signalling	yes	yes	Gunter et al. 2013	NA
on.gene.LG7.94	tnni2 (1 of 7)	troponin I, fast skeletal muscle-like	Muscle contraction and cytoskeleton signalling	yes	yes	Gunter et al. 2013	NA
on.gene.LG7.95	tnni2 (2 of 5)	troponin I, fast skeletal muscle-like	Muscle contraction and cytoskeleton signalling	yes	yes	Gunter et al. 2013	NA
on.gene.LG1.493	tpm1(alpha)	tropomyosin alpha-4 chain-like	Muscle contraction and cytoskeleton signalling	yes	yes	Gunter et al. 2013	NA
on.gene.LG7.302	tpm2	tropomyosin alpha-4 chain-like	Muscle contraction and cytoskeleton signalling	yes	yes	Gunter et al. 2013	NA
on.gene.LG7.1111	tpma	tropomyosin alpha-4 chain-like	Muscle contraction and cytoskeleton signalling	yes	yes	Gunter et al. 2013	NA
on.gene.LG8-24.370	tnnt1-1-like	troponin T, slow skeletal muscle-like	Muscle contraction and cytoskeleton signalling	no	no	Schneider et al. 2014	NA
on.gene.LG4.371	tnnt1 (2 of 2)	troponin T, slow skeletal muscle-like	Muscle contraction and cytoskeleton signalling	yes	yes	Schneider et al. 2014	NA
on.gene.LG7.99	tnnt3 (1 of 2)	troponin T, fast skeletal muscle isoforms-like	Muscle contraction and cytoskeleton signalling	yes	yes	Schneider et al. 2014	NA
on.gene.UNK322.2	tnnt3 (2 of 2)	troponin T, fast skeletal muscle isoforms-like	Muscle contraction and cytoskeleton signalling	yes	yes	Schneider et al. 2014	NA
on.gene.LG23.471	tpm4	tropomyosin alpha-4 chain-like	Muscle contraction and cytoskeleton signalling	yes	yes	Schneider et al. 2014	NA
on.gene.LG23.509	rxra	Retinoid X receptor alpha 2	retinoic acid singalling pathway	yes	no	NA	Hulsey et al. 2016
on.gene.LG5.441	rarg (2 of 2)	retinoic acid receptor gamma-A-like	retinoic acid singalling pathway	yes	yes	NA	Hulsey et al. 2016
on.gene.LG10.316	ryr1	ryanodine receptor 1-like	retinoic acid singalling pathway	yes	yes	Schneider et al. 2014	NA
on.gene.LG14.669	ryr1-like	ryanodine receptor 1-like	retinoic acid singalling pathway	yes	yes	Schneider et al. 2014	NA
on.gene.LG13.891	wnt7B	protein Wnt-7b-like	wnt/beta-catenin signalling	no	no	NA	Fraser et al. 2008, Bloomquist et al. 2015
on.gene.LG17.621	wnt7b	protein Wnt-7b-like	wnt/beta-catenin signalling	yes	no	NA	Fraser et al. 2008, Bloomquist et al. 2015
on.gene.LG6.340	lef1	lymphoid enhancer-binding factor 1	wnt/beta-catenin signalling	no	yes
on.gene.LG18.504	wnt9a	wingless-type MMTV integration site family, member 9A	wnt/beta-catenin signalling	yes	no
on.gene.LG4.626	wnt9b	wingless-type MMTV integration site family, member 9B	wnt/beta-catenin signalling	yes	no
on.gene.LG19.198	lbh	limb bud and heart development homolog	wnt/beta-catenin signalling	yes	yes
on.gene.LG17.590	wnt5b	wingless-type MMTV integration site family, member 5B	wnt/beta-catenin signalling	yes	yes
on.gene.LG20.650	wnt5a	protein Wnt-5a-like	wnt/beta-catenin signalling/ cichlid jaw plasticity network	no	yes	Gunter et al. 2013	Fraser et al. 2013, Hulsey et al. 2016
