# Supplementary material for: The Role of Alternative Splicing and Differential Gene Expression in Cichlid Adaptive Radiation
Source: Oxford University Press journal article supplement (doi:10.1093/gbe/evx204), 2017-09-26
Supplement: supp_file_4_evx204.xlsx [file supp_file_4_evx204.xlsx]

## Sheet: Ch_Drerio
Onil_transcripID	denovo_trancriptID_QUERY	Drerio_transcriptID_SUBJECT	percentID	eval	bit_score
on.mrna.LG1.1.1	m.3353	ENSDART00000008785.8	82.37	7e-75	281
on.mrna.LG1.1.2	m.3355	ENSDART00000008785.8	84.52	6e-64	244
on.mrna.LG1.10.1	m.3322	ENSDART00000163134.1	84.03	2e-15	85.7
on.mrna.LG1.100.1	m.223	ENSDART00000029549.8	79.58	3e-110	400
on.mrna.LG1.100.2	m.229	ENSDART00000029549.8	79.58	3e-110	400
on.mrna.LG1.100.3	m.220	ENSDART00000029549.8	79.58	3e-110	400
on.mrna.LG1.100.4	m.226	ENSDART00000029549.8	79.58	3e-110	400
on.mrna.LG1.101.1	m.3632	ENSDART00000039969.5	92.59	0.51	38.2
on.mrna.LG1.102.1	m.3011	ENSDART00000151550.1	84.39	3e-28	129
on.mrna.LG1.102.2	m.3006	ENSDART00000151550.1	84.39	3e-28	129
on.mrna.LG1.102.3	m.3016	ENSDART00000151550.1	84.39	3e-28	129
on.mrna.LG1.102.4	m.3001	ENSDART00000151550.1	84.39	3e-28	129
on.mrna.LG1.103.1	m.4743	ENSDART00000149321.1	80.32	3e-09	63.9
on.mrna.LG1.104.1	m.3972	ENSDART00000121864.2	88.1	5e-16	87.7
on.mrna.LG1.105.1	m.232	ENSDART00000052641.5	79.28	2e-97	357
on.mrna.LG1.106.1	m.5732	ENSDART00000129125.2	79.47	6e-91	337
on.mrna.LG1.107.1	m.2911	ENSDART00000047471.7	100	4	32.2
on.mrna.LG1.108.1	m.2267	ENSDART00000013525.7	100	0.031	40.1
on.mrna.LG1.108.2	m.2248	ENSDART00000013525.7	100	0.031	40.1
on.mrna.LG1.108.3	m.2256	ENSDART00000013525.7	100	0.031	40.1
on.mrna.LG1.108.4	m.2250	ENSDART00000013525.7	100	0.029	40.1
on.mrna.LG1.108.5	m.2261	ENSDART00000013525.7	100	0.029	40.1
on.mrna.LG1.108.6	m.2253	ENSDART00000013525.7	100	0.1	40.1
on.mrna.LG1.108.7	m.2258	ENSDART00000013525.7	100	0.1	40.1
on.mrna.LG1.108.8	m.2264	ENSDART00000013525.7	100	0.1	40.1
on.mrna.LG1.109.1	m.3968	ENSDART00000159781.1	81.72	9e-05	50.1
on.mrna.LG1.109.2	m.3960	ENSDART00000159781.1	81.72	0.0001	50.1
on.mrna.LG1.109.3	m.3966	ENSDART00000159781.1	95.83	1e-13	79.8
on.mrna.LG1.109.4	m.3962	ENSDART00000159781.1	95.83	2e-13	79.8
on.mrna.LG1.109.5	m.3964	ENSDART00000159781.1	95.83	9e-14	79.8
on.mrna.LG1.109.6	m.3970	ENSDART00000159781.1	95.83	7e-14	79.8
on.mrna.LG1.11.1	m.4054	ENSDART00000169830.1	82.1	1e-65	252
on.mrna.LG1.11.2	m.4052	ENSDART00000169830.1	82.06	2e-58	228
on.mrna.LG1.110.1	m.3976	ENSDART00000102553.4	85.95	1e-21	105
on.mrna.LG1.110.2	m.3975	ENSDART00000102553.4	85.95	1e-21	105
on.mrna.LG1.110.3	m.3978	ENSDART00000102553.4	85.95	1e-21	105
on.mrna.LG1.110.4	m.3977	ENSDART00000102553.4	85.95	1e-21	105
on.mrna.LG1.111.1	m.3052	ENSDART00000159480.1	88.14	2e-08	61.9
on.mrna.LG1.111.2	m.3057	ENSDART00000159480.1	80.42	2e-18	95.6
on.mrna.LG1.111.3	m.3049	ENSDART00000159480.1	80.42	2e-18	95.6
on.mrna.LG1.111.4	m.3054	ENSDART00000159480.1	80.42	2e-18	95.6
on.mrna.LG1.111.5	m.3047	ENSDART00000159480.1	80.42	2e-18	95.6
on.mrna.LG1.112.1	m.3242	ENSDART00000109970.3	100	0.057	40.1
on.mrna.LG1.112.2	m.3248	ENSDART00000109970.3	100	0.061	40.1
on.mrna.LG1.112.3	m.3239	ENSDART00000109970.3	100	0.057	40.1
on.mrna.LG1.112.4	m.3245	ENSDART00000109970.3	100	0.061	40.1
on.mrna.LG1.113.1	m.1891	ENSDART00000081319.5	85.47	5e-19	97.6
on.mrna.LG1.113.2	m.1895	ENSDART00000081319.5	85.47	5e-19	97.6
on.mrna.LG1.113.3	m.1884	ENSDART00000081319.5	85.47	5e-19	97.6
on.mrna.LG1.113.4	m.1899	ENSDART00000081319.5	85.47	4e-19	97.6
on.mrna.LG1.113.5	m.1881	ENSDART00000081319.5	85.47	4e-19	97.6
on.mrna.LG1.113.6	m.1888	ENSDART00000081319.5	85.47	3e-19	97.6
on.mrna.LG1.114.1	m.2458	ENSDART00000168352.1	90	3e-76	285
on.mrna.LG1.115.1	m.901	ENSDART00000003475.5	89.47	1e-09	65.9
on.mrna.LG1.115.1	m.902	ENSDART00000003475.5	89.47	1e-09	65.9
on.mrna.LG1.116.1	m.1851	ENSDART00000036050.7	81.89	6e-72	272
on.mrna.LG1.116.2	m.1850	ENSDART00000036050.7	81.89	6e-72	272
on.mrna.LG1.116.3	m.1852	ENSDART00000036050.7	81.89	6e-72	272
on.mrna.LG1.117.1	m.5228	ENSDART00000015559.10	100	0.56	38.2
on.mrna.LG1.117.1	m.5229	ENSDART00000123117.2	100	7.7	34.2
on.mrna.LG1.117.2	m.5235	ENSDART00000015559.10	100	0.56	38.2
on.mrna.LG1.117.2	m.5236	ENSDART00000123117.2	100	7.7	34.2
on.mrna.LG1.117.3	m.5242	ENSDART00000015559.10	100	0.56	38.2
on.mrna.LG1.117.3	m.5243	ENSDART00000123117.2	100	6	34.2
on.mrna.LG1.118.1	m.4394	ENSDART00000165019.1	87.5	5e-47	190
on.mrna.LG1.118.2	m.4391	ENSDART00000165019.1	87.5	5e-47	190
on.mrna.LG1.119.1	m.3295	ENSDART00000014528.8	100	2.9	36.2
on.mrna.LG1.119.1	m.3297	ENSDART00000014528.8	100	1.5	36.2
on.mrna.LG1.119.2	m.3287	ENSDART00000014528.8	100	2	36.2
on.mrna.LG1.119.2	m.3289	ENSDART00000014528.8	100	1.5	36.2
on.mrna.LG1.119.3	m.3279	ENSDART00000014528.8	100	2.9	36.2
on.mrna.LG1.119.3	m.3281	ENSDART00000014528.8	100	1.5	36.2
on.mrna.LG1.12.1	m.4881	ENSDART00000164643.1	81.82	7e-91	337
on.mrna.LG1.12.2	m.4884	ENSDART00000164643.1	81.82	7e-91	337
on.mrna.LG1.12.3	m.4887	ENSDART00000164643.1	81.82	9e-91	337
on.mrna.LG1.1210001.1	m.4004	ENSDART00000003712.7	79.17	9e-43	176
on.mrna.LG1.122.1	m.4107	ENSDART00000102430.4	100	0.19	38.2
on.mrna.LG1.122.2	m.4105	ENSDART00000140476.1	100	0.015	42.1
on.mrna.LG1.123.1	m.5884	ENSDART00000079175.5	81.44	8e-05	50.1
on.mrna.LG1.123.2	m.5888	ENSDART00000079175.5	81.44	9e-05	50.1
on.mrna.LG1.123.3	m.5886	ENSDART00000079175.5	80.14	4e-07	58
on.mrna.LG1.123.4	m.5882	ENSDART00000079175.5	80.14	5e-07	58
on.mrna.LG1.124.1	m.5070	ENSDART00000145251.1	87.27	3e-06	54
on.mrna.LG1.124.2	m.5069	ENSDART00000145251.1	87.27	4e-06	54
on.mrna.LG1.124.3	m.5071	ENSDART00000145251.1	87.27	3e-06	54
on.mrna.LG1.124.4	m.5072	ENSDART00000145251.1	87.27	3e-06	54
on.mrna.LG1.125.1	m.5080	ENSDART00000066558.4	100	4.6	34.2
on.mrna.LG1.126.1	m.1526	ENSDART00000049805.6	100	0.005	46.1
on.mrna.LG1.127.1	m.3230	ENSDART00000026434.7	100	0.051	40.1
on.mrna.LG1.127.10	m.3231	ENSDART00000026434.7	100	0.042	40.1
on.mrna.LG1.127.11	m.3234	ENSDART00000026434.7	100	0.027	40.1
on.mrna.LG1.127.12	m.3228	ENSDART00000026434.7	100	0.037	40.1
on.mrna.LG1.127.13	m.3225	ENSDART00000026434.7	100	0.027	40.1
on.mrna.LG1.127.2	m.3233	ENSDART00000026434.7	100	0.042	40.1
on.mrna.LG1.127.3	m.3229	ENSDART00000026434.7	100	0.046	40.1
on.mrna.LG1.127.4	m.3235	ENSDART00000026434.7	100	0.036	40.1
on.mrna.LG1.127.5	m.3232	ENSDART00000026434.7	100	0.049	40.1
on.mrna.LG1.127.6	m.3227	ENSDART00000026434.7	100	0.036	40.1
on.mrna.LG1.127.7	m.3236	ENSDART00000026434.7	100	0.034	40.1
on.mrna.LG1.127.8	m.3224	ENSDART00000026434.7	100	0.044	40.1
on.mrna.LG1.127.9	m.3226	ENSDART00000026434.7	100	0.034	40.1
on.mrna.LG1.128.1	m.3979	ENSDART00000168428.1	85.94	2e-06	56
on.mrna.LG1.128.2	m.3981	ENSDART00000168428.1	85.94	1e-06	56
on.mrna.LG1.129.1	m.2627	ENSDART00000168091.1	80.67	2e-70	268
on.mrna.LG1.13.1	m.5627	ENSDART00000010322.8	86.49	2e-10	67.9
on.mrna.LG1.13.2	m.5626	ENSDART00000010322.8	86.49	2e-10	67.9
on.mrna.LG1.130.1	m.1995	ENSDART00000048610.7	100	0.14	38.2
on.mrna.LG1.132.1	m.299	ENSDART00000082153.5	100	0.046	42.1
on.mrna.LG1.132.2	m.301	ENSDART00000082153.5	100	0.041	42.1
on.mrna.LG1.1320001.1	m.2902	ENSDART00000054925.6	82.95	9e-24	111
on.mrna.LG1.133.1	m.513	ENSDART00000055047.6	81.82	4e-24	113
on.mrna.LG1.133.2	m.514	ENSDART00000055047.6	81.82	4e-24	113
on.mrna.LG1.135.1	m.5781	ENSDART00000022307.9	78.86	8e-98	359
on.mrna.LG1.135.2	m.5779	ENSDART00000022307.9	79.26	2e-61	238
on.mrna.LG1.135.3	m.5783	ENSDART00000022307.9	78.86	6e-98	359
on.mrna.LG1.136.1	m.4698	ENSDART00000010521.7	82.54	5e-50	202
on.mrna.LG1.136.2	m.4712	ENSDART00000010521.7	82.54	4e-50	202
on.mrna.LG1.136.3	m.4691	ENSDART00000010521.7	82.54	5e-50	202
on.mrna.LG1.136.4	m.4719	ENSDART00000010521.7	82.54	5e-50	202
on.mrna.LG1.136.5	m.4705	ENSDART00000010521.7	82.54	5e-50	202
on.mrna.LG1.137.1	m.1982	ENSDART00000091901.5	84.4	2e-92	339
on.mrna.LG1.137.2	m.1981	ENSDART00000091901.5	84.49	2e-133	476
on.mrna.LG1.137.3	m.1983	ENSDART00000091901.5	84.25	0	670
on.mrna.LG1.137.4	m.1979	ENSDART00000091901.5	84.39	7e-177	620
on.mrna.LG1.138.1	m.3931	ENSDART00000169908.1	79.02	5e-27	123
on.mrna.LG1.138.2	m.3930	ENSDART00000169908.1	79.02	5e-27	123
on.mrna.LG1.139.1	m.1753	ENSDART00000065933.5	82.02	2e-19	99.6
on.mrna.LG1.139.2	m.1755	ENSDART00000065933.5	82.02	2e-19	99.6
on.mrna.LG1.14.1	m.4446	ENSDART00000039810.6	80.4	2e-117	426
on.mrna.LG1.140.1	m.3160	ENSDART00000111091.3	91.67	1e-08	63.9
on.mrna.LG1.140.2	m.3181	ENSDART00000111091.3	91.67	2e-08	63.9
on.mrna.LG1.140.3	m.3187	ENSDART00000111091.3	91.67	1e-08	63.9
on.mrna.LG1.140.4	m.3175	ENSDART00000111091.3	91.67	2e-08	63.9
on.mrna.LG1.140.5	m.3169	ENSDART00000111091.3	91.67	2e-08	63.9
on.mrna.LG1.140.6	m.3164	ENSDART00000111091.3	91.67	1e-08	63.9
on.mrna.LG1.141.1	m.5102	ENSDART00000033528.7	100	0.44	38.2
on.mrna.LG1.142.1	m.4113	ENSDART00000026135.8	93.1	0.039	42.1
on.mrna.LG1.142.2	m.4110	ENSDART00000026135.8	93.1	0.039	42.1
on.mrna.LG1.142.3	m.4111	ENSDART00000026135.8	93.1	0.023	42.1
on.mrna.LG1.142.4	m.4109	ENSDART00000026135.8	93.1	0.032	42.1
on.mrna.LG1.142.5	m.4112	ENSDART00000026135.8	93.1	0.026	42.1
on.mrna.LG1.143.1	m.752	ENSDART00000126243.2	77.75	6e-16	87.7
on.mrna.LG1.143.10	m.689	ENSDART00000150989.2	81.94	2e-13	79.8
on.mrna.LG1.143.11	m.737	ENSDART00000126243.2	80.92	4e-11	71.9
on.mrna.LG1.143.12	m.809	ENSDART00000126243.2	80.92	3e-11	71.9
on.mrna.LG1.143.13	m.698	ENSDART00000126243.2	80.92	4e-11	71.9
on.mrna.LG1.143.14	m.764	ENSDART00000150989.2	81.94	1e-13	79.8
on.mrna.LG1.143.15	m.803	ENSDART00000110069.3	96.55	0.0001	50.1
on.mrna.LG1.143.16	m.731	ENSDART00000126243.2	80.92	3e-11	71.9
on.mrna.LG1.143.17	m.791	ENSDART00000110069.3	96.55	0.0001	50.1
on.mrna.LG1.143.18	m.788	ENSDART00000126243.2	80.92	4e-11	71.9
on.mrna.LG1.143.19	m.725	ENSDART00000126243.2	80.92	3e-11	71.9
on.mrna.LG1.143.2	m.782	ENSDART00000126243.2	77.75	6e-16	87.7
on.mrna.LG1.143.20	m.749	ENSDART00000110069.3	96.55	0.0001	50.1
on.mrna.LG1.143.21	m.710	ENSDART00000126243.2	80.92	3e-11	71.9
on.mrna.LG1.143.22	m.770	ENSDART00000110069.3	96.55	0.0001	50.1
on.mrna.LG1.143.23	m.695	ENSDART00000126243.2	80.92	3e-11	71.9
on.mrna.LG1.143.24	m.683	ENSDART00000110069.3	96.55	8e-05	50.1
on.mrna.LG1.143.25	m.758	ENSDART00000110069.3	96.55	8e-05	50.1
on.mrna.LG1.143.26	m.707	ENSDART00000110069.3	96.55	8e-05	50.1
on.mrna.LG1.143.27	m.776	ENSDART00000110069.3	96.55	8e-05	50.1
on.mrna.LG1.143.28	m.785	ENSDART00000126243.2	77.75	5e-16	87.7
on.mrna.LG1.143.29	m.773	ENSDART00000126243.2	81.69	2e-12	75.8
on.mrna.LG1.143.3	m.755	ENSDART00000126243.2	77.75	5e-16	87.7
on.mrna.LG1.143.30	m.716	ENSDART00000126243.2	77.75	5e-16	87.7
on.mrna.LG1.143.31	m.740	ENSDART00000150989.2	77.86	3e-17	91.7
on.mrna.LG1.143.32	m.812	ENSDART00000126243.2	80.92	3e-11	71.9
on.mrna.LG1.143.33	m.821	ENSDART00000126243.2	81.69	2e-12	75.8
on.mrna.LG1.143.34	m.743	ENSDART00000150989.2	81.94	1e-13	79.8
on.mrna.LG1.143.35	m.719	ENSDART00000150989.2	77.86	3e-17	91.7
on.mrna.LG1.143.36	m.779	ENSDART00000126243.2	80.92	3e-11	71.9
on.mrna.LG1.143.37	m.704	ENSDART00000126243.2	80.92	3e-11	71.9
on.mrna.LG1.143.38	m.800	ENSDART00000126243.2	80.92	3e-11	71.9
on.mrna.LG1.143.39	m.686	ENSDART00000150989.2	81.94	1e-13	79.8
on.mrna.LG1.143.4	m.761	ENSDART00000126243.2	81.69	2e-12	75.8
on.mrna.LG1.143.40	m.722	ENSDART00000110069.3	96.55	8e-05	50.1
on.mrna.LG1.143.41	m.746	ENSDART00000126243.2	80.92	3e-11	71.9
on.mrna.LG1.143.42	m.818	ENSDART00000110069.3	96.55	8e-05	50.1
on.mrna.LG1.143.43	m.728	ENSDART00000126243.2	80.92	3e-11	71.9
on.mrna.LG1.143.44	m.734	ENSDART00000126243.2	80.92	3e-11	71.9
on.mrna.LG1.143.45	m.815	ENSDART00000110069.3	96.55	8e-05	50.1
on.mrna.LG1.143.46	m.794	ENSDART00000110069.3	96.55	8e-05	50.1
on.mrna.LG1.143.47	m.677	ENSDART00000110069.3	96.55	8e-05	50.1
on.mrna.LG1.143.48	m.767	ENSDART00000126243.2	80.92	3e-11	71.9
on.mrna.LG1.143.49	m.701	ENSDART00000110069.3	96.55	8e-05	50.1
on.mrna.LG1.143.5	m.692	ENSDART00000150989.2	77.86	4e-17	91.7
on.mrna.LG1.143.50	m.713	ENSDART00000110069.3	96.55	8e-05	50.1
on.mrna.LG1.143.51	m.824	ENSDART00000110069.3	96.55	8e-05	50.1
on.mrna.LG1.143.6	m.680	ENSDART00000126243.2	77.75	6e-16	87.7
on.mrna.LG1.143.7	m.797	ENSDART00000126243.2	80.92	4e-11	71.9
on.mrna.LG1.143.8	m.827	ENSDART00000126243.2	81.69	2e-12	75.8
on.mrna.LG1.143.9	m.806	ENSDART00000150989.2	77.86	3e-17	91.7
on.mrna.LG1.144.1	m.6176	ENSDART00000109552.2	83.03	5e-93	345
on.mrna.LG1.144.2	m.6149	ENSDART00000109552.2	83.03	5e-93	345
on.mrna.LG1.144.3	m.6167	ENSDART00000109552.2	83.62	2e-83	313
on.mrna.LG1.144.4	m.6194	ENSDART00000109552.2	83.41	7e-80	301
on.mrna.LG1.144.5	m.6185	ENSDART00000109552.2	83.59	1e-56	224
on.mrna.LG1.144.6	m.6158	ENSDART00000109552.2	83.03	5e-93	345
on.mrna.LG1.145.1	m.2153	ENSDART00000121431.1	79.07	7e-27	123
on.mrna.LG1.145.2	m.2152	ENSDART00000121431.1	79.07	7e-27	123
on.mrna.LG1.146.1	m.2830	ENSDART00000109344.3	88.31	9e-14	81.8
on.mrna.LG1.146.2	m.2817	ENSDART00000109344.3	88.31	9e-14	81.8
on.mrna.LG1.146.3	m.2824	ENSDART00000109344.3	89.36	1e-05	54
on.mrna.LG1.1460001.1	m.934	ENSDART00000109344.3	92.59	0.091	38.2
on.mrna.LG1.147.1	m.98	ENSDART00000102118.4	80.6	5e-48	192
on.mrna.LG1.147.2	m.99	ENSDART00000077744.4	80.58	4e-45	182
on.mrna.LG1.148.1	m.1297	ENSDART00000037986.7	86.36	0.057	40.1
on.mrna.LG1.148.2	m.1300	ENSDART00000037986.7	85.11	0.17	38.2
on.mrna.LG1.148.3	m.1296	ENSDART00000162181.1	100	0.51	36.2
on.mrna.LG1.148.4	m.1299	ENSDART00000162181.1	100	0.51	36.2
on.mrna.LG1.149.1	m.352	ENSDART00000013066.7	83.3	0	914
on.mrna.LG1.149.2	m.353	ENSDART00000013066.7	83.25	0	870
on.mrna.LG1.15.1	m.2460	ENSDART00000122929.3	79.06	2e-45	184
on.mrna.LG1.15.2	m.2476	ENSDART00000122929.3	79.06	2e-45	184
on.mrna.LG1.15.3	m.2468	ENSDART00000092919.4	80.14	3e-41	170
on.mrna.LG1.15.4	m.2470	ENSDART00000122929.3	79.06	2e-45	184
on.mrna.LG1.15.5	m.2474	ENSDART00000122929.3	79.06	2e-45	184
on.mrna.LG1.15.6	m.2466	ENSDART00000122929.3	79.06	2e-45	184
on.mrna.LG1.15.7	m.2464	ENSDART00000122929.3	79.06	2e-45	184
on.mrna.LG1.15.8	m.2462	ENSDART00000122929.3	79.06	2e-45	184
on.mrna.LG1.15.9	m.2472	ENSDART00000122929.3	79.06	2e-45	184
on.mrna.LG1.150.1	m.5429	ENSDART00000144335.1	77.43	2e-15	85.7
on.mrna.LG1.150.2	m.5428	ENSDART00000144335.1	77.43	1e-15	85.7
on.mrna.LG1.151.1	m.2801	ENSDART00000168973.1	81.6	1e-23	113
on.mrna.LG1.152.1	m.3851	ENSDART00000135066.2	100	4.1	32.2
on.mrna.LG1.154.1	m.270	ENSDART00000122042.2	84.62	0.0001	50.1
on.mrna.LG1.155.1	m.5663	ENSDART00000025031.9	86.84	5e-21	103
on.mrna.LG1.1550001.1	m.5541	ENSDART00000092290.4	84.68	4e-76	287
on.mrna.LG1.1550002.1	m.4137	ENSDART00000092290.4	84.68	5e-76	287
on.mrna.LG1.1580001.1	m.503	ENSDART00000052912.6	79.63	2e-37	159
on.mrna.LG1.159.1	m.3539	ENSDART00000028955.4	79.18	4e-26	121
on.mrna.LG1.159.2	m.3535	ENSDART00000028955.4	83.48	4e-13	77.8
on.mrna.LG1.159.3	m.3537	ENSDART00000028955.4	86.36	1e-19	99.6
on.mrna.LG1.16.1	m.3026	ENSDART00000158160.1	90.99	4e-74	281
on.mrna.LG1.160.1	m.1740	ENSDART00000139900.3	87.64	2e-16	89.7
on.mrna.LG1.161.1	m.5027	ENSDART00000139900.3	84.55	3e-15	83.8
on.mrna.LG1.164.1	m.2492	ENSDART00000155592.2	82.24	1e-79	299
on.mrna.LG1.165.1	m.3083	ENSDART00000111412.3	89.74	0.002	46.1
on.mrna.LG1.166.1	m.929	ENSDART00000033980.6	84.93	0	706
on.mrna.LG1.166.2	m.919	ENSDART00000033980.6	84.76	3e-126	452
on.mrna.LG1.166.3	m.915	ENSDART00000033980.6	84.76	3e-126	452
on.mrna.LG1.166.4	m.931	ENSDART00000033980.6	84.76	3e-126	452
on.mrna.LG1.166.5	m.923	ENSDART00000033980.6	84.76	3e-126	452
on.mrna.LG1.166.6	m.925	ENSDART00000160139.1	83.48	1e-172	607
on.mrna.LG1.166.7	m.927	ENSDART00000160139.1	83.48	1e-172	607
on.mrna.LG1.166.8	m.921	ENSDART00000033980.6	84.62	2e-148	525
on.mrna.LG1.166.9	m.917	ENSDART00000033980.6	84.08	4e-72	272
on.mrna.LG1.1660001.1	m.5116	ENSDART00000168416.1	82.54	2e-175	617
on.mrna.LG1.167.1	m.5010	ENSDART00000087797.4	80	2e-19	99.6
on.mrna.LG1.168.1	m.5503	ENSDART00000160843.1	79.31	3e-140	500
on.mrna.LG1.168.2	m.5509	ENSDART00000160843.1	79.7	0	656
on.mrna.LG1.168.3	m.5499	ENSDART00000160843.1	79.55	2e-154	547
on.mrna.LG1.168.4	m.5505	ENSDART00000160843.1	79.7	0	656
on.mrna.LG1.169.1	m.5419	ENSDART00000124242.3	90.91	0.017	42.1
on.mrna.LG1.169.2	m.5418	ENSDART00000101664.4	92.59	0.19	38.2
on.mrna.LG1.17.1	m.285	ENSDART00000160072.1	77.66	4e-38	161
on.mrna.LG1.17.2	m.292	ENSDART00000160072.1	77.66	4e-38	161
on.mrna.LG1.17.3	m.296	ENSDART00000160072.1	77.7	3e-35	151
on.mrna.LG1.17.4	m.282	ENSDART00000160072.1	77.66	3e-38	161
on.mrna.LG1.17.5	m.289	ENSDART00000160072.1	77.66	3e-38	161
on.mrna.LG1.170.1	m.5092	ENSDART00000164081.1	78.5	2e-24	115
on.mrna.LG1.171.1	m.3676	ENSDART00000060968.6	81.58	3e-31	139
on.mrna.LG1.172.1	m.5571	ENSDART00000059861.6	81.76	2e-96	353
on.mrna.LG1.172.2	m.5572	ENSDART00000059861.6	81.23	9e-99	361
on.mrna.LG1.172.3	m.5573	ENSDART00000059861.6	80.52	1e-60	234
on.mrna.LG1.173.1	m.2308	ENSDART00000109529.3	79.9	2e-54	214
on.mrna.LG1.173.10	m.2300	ENSDART00000109529.3	79.9	2e-54	214
on.mrna.LG1.173.11	m.2296	ENSDART00000109529.3	80.3	7e-71	270
on.mrna.LG1.173.2	m.2304	ENSDART00000109529.3	80.3	4e-71	270
on.mrna.LG1.173.3	m.2310	ENSDART00000109529.3	80.3	7e-71	270
on.mrna.LG1.173.4	m.2302	ENSDART00000109529.3	80.3	7e-71	270
on.mrna.LG1.173.5	m.2298	ENSDART00000109529.3	80.3	5e-71	270
on.mrna.LG1.173.6	m.2316	ENSDART00000109529.3	80.3	5e-71	270
on.mrna.LG1.173.7	m.2314	ENSDART00000109529.3	80.3	7e-71	270
on.mrna.LG1.173.8	m.2306	ENSDART00000109529.3	80.3	7e-71	270
on.mrna.LG1.173.9	m.2312	ENSDART00000109529.3	80.3	7e-71	270
on.mrna.LG1.175.1	m.552	ENSDART00000081743.5	91.53	2e-36	155
on.mrna.LG1.175.1	m.553	ENSDART00000081743.5	91.53	2e-36	155
on.mrna.LG1.176.1	m.432	ENSDART00000109615.4	95.65	0.3	38.2
on.mrna.LG1.176.2	m.435	ENSDART00000109615.4	95.65	0.3	38.2
on.mrna.LG1.177.1	m.1037	ENSDART00000010092.6	80.78	4e-60	234
on.mrna.LG1.178.1	m.889	ENSDART00000098627.4	83.33	3e-48	194
on.mrna.LG1.179.1	m.5800	ENSDART00000092524.5	80.4	0	741
on.mrna.LG1.179.2	m.5801	ENSDART00000092524.5	81.32	0	1253
on.mrna.LG1.18.1	m.1014	ENSDART00000162777.1	83.89	6e-173	609
on.mrna.LG1.180.1	m.2057	ENSDART00000112730.3	80.07	2e-174	615
on.mrna.LG1.180.2	m.2060	ENSDART00000112730.3	80.07	2e-174	615
on.mrna.LG1.180.3	m.2066	ENSDART00000112730.3	80.07	2e-174	615
on.mrna.LG1.180.4	m.2063	ENSDART00000112730.3	80.07	2e-174	615
on.mrna.LG1.181.1	m.5225	ENSDART00000148175.3	100	0.87	36.2
on.mrna.LG1.182.1	m.1090	ENSDART00000114831.3	81.01	0.14	38.2
on.mrna.LG1.182.2	m.1095	ENSDART00000114831.3	81.01	0.18	38.2
on.mrna.LG1.183.1	m.3721	ENSDART00000152684.2	89.23	3e-12	73.8
on.mrna.LG1.184.1	m.5855	ENSDART00000031635.5	82.13	3e-34	149
on.mrna.LG1.184.2	m.5864	ENSDART00000031635.5	82.13	2e-34	149
on.mrna.LG1.184.3	m.5869	ENSDART00000144406.2	88.18	3e-24	115
on.mrna.LG1.184.4	m.5860	ENSDART00000144406.2	88.18	3e-24	115
on.mrna.LG1.185.1	m.4238	ENSDART00000108579.4	81.85	1e-74	281
on.mrna.LG1.186.1	m.3792	ENSDART00000144606.2	97.44	9e-11	69.9
on.mrna.LG1.187.1	m.350	ENSDART00000081945.3	83.12	4e-50	198
on.mrna.LG1.188.1	m.2798	ENSDART00000020327.8	94.23	5e-14	79.8
on.mrna.LG1.189.1	m.5535	ENSDART00000063150.4	100	0.009	42.1
on.mrna.LG1.19.1	m.15	ENSDART00000098904.3	83.81	1e-34	149
on.mrna.LG1.19.2	m.9	ENSDART00000098904.3	83.81	1e-34	149
on.mrna.LG1.19.3	m.5	ENSDART00000098904.3	83.81	1e-34	149
on.mrna.LG1.19.4	m.1	ENSDART00000098904.3	83.81	1e-34	149
on.mrna.LG1.190.1	m.4456	ENSDART00000084069.4	100	0.15	38.2
on.mrna.LG1.190.2	m.4460	ENSDART00000084069.4	100	0.23	38.2
on.mrna.LG1.190.2	m.4461	ENSDART00000084069.4	100	0.13	38.2
on.mrna.LG1.190.3	m.4462	ENSDART00000084069.4	100	0.15	38.2
on.mrna.LG1.190.4	m.4458	ENSDART00000084069.4	100	0.23	38.2
on.mrna.LG1.190.4	m.4459	ENSDART00000084069.4	100	0.13	38.2
on.mrna.LG1.192.1	m.2947	ENSDART00000168816.1	88.42	3e-20	101
on.mrna.LG1.193.1	m.4733	ENSDART00000126093.2	81.69	6e-37	157
on.mrna.LG1.194.1	m.1186	ENSDART00000132379.1	86.08	2e-10	69.9
on.mrna.LG1.194.10	m.1276	ENSDART00000132379.1	86.08	2e-10	69.9
on.mrna.LG1.194.11	m.1247	ENSDART00000132379.1	86.08	2e-10	69.9
on.mrna.LG1.194.12	m.1193	ENSDART00000132379.1	86.08	2e-10	69.9
on.mrna.LG1.194.13	m.1203	ENSDART00000132379.1	86.08	2e-10	69.9
on.mrna.LG1.194.14	m.1178	ENSDART00000132379.1	86.08	2e-10	69.9
on.mrna.LG1.194.15	m.1279	ENSDART00000132379.1	86.08	2e-10	69.9
on.mrna.LG1.194.16	m.1165	ENSDART00000132379.1	86.08	2e-10	69.9
on.mrna.LG1.194.17	m.1132	ENSDART00000132379.1	86.08	2e-10	69.9
on.mrna.LG1.194.18	m.1149	ENSDART00000132379.1	86.08	2e-10	69.9
on.mrna.LG1.194.19	m.1167	ENSDART00000132379.1	86.08	2e-10	69.9
on.mrna.LG1.194.2	m.1152	ENSDART00000132379.1	86.08	2e-10	69.9
on.mrna.LG1.194.20	m.1146	ENSDART00000132379.1	86.08	2e-10	69.9
on.mrna.LG1.194.21	m.1235	ENSDART00000132379.1	86.08	2e-10	69.9
on.mrna.LG1.194.22	m.1173	ENSDART00000132379.1	86.08	2e-10	69.9
on.mrna.LG1.194.23	m.1263	ENSDART00000132379.1	86.08	2e-10	69.9
on.mrna.LG1.194.24	m.1208	ENSDART00000132379.1	86.08	2e-10	69.9
on.mrna.LG1.194.25	m.1281	ENSDART00000132379.1	86.08	2e-10	69.9
on.mrna.LG1.194.26	m.1190	ENSDART00000132379.1	86.08	2e-10	69.9
on.mrna.LG1.194.27	m.1257	ENSDART00000132379.1	86.08	2e-10	69.9
on.mrna.LG1.194.28	m.1232	ENSDART00000132379.1	86.08	2e-10	69.9
on.mrna.LG1.194.29	m.1220	ENSDART00000132379.1	86.08	2e-10	69.9
on.mrna.LG1.194.3	m.1253	ENSDART00000132379.1	86.08	2e-10	69.9
on.mrna.LG1.194.30	m.1138	ENSDART00000132379.1	86.08	2e-10	69.9
on.mrna.LG1.194.31	m.1159	ENSDART00000132379.1	86.08	2e-10	69.9
on.mrna.LG1.194.32	m.1226	ENSDART00000132379.1	86.08	2e-10	69.9
on.mrna.LG1.194.33	m.1129	ENSDART00000132379.1	86.08	2e-10	69.9
on.mrna.LG1.194.34	m.1284	ENSDART00000132379.1	86.08	2e-10	69.9
on.mrna.LG1.194.35	m.1242	ENSDART00000132379.1	86.08	2e-10	69.9
on.mrna.LG1.194.36	m.1205	ENSDART00000132379.1	86.08	2e-10	69.9
on.mrna.LG1.194.37	m.1135	ENSDART00000132379.1	86.08	2e-10	69.9
on.mrna.LG1.194.38	m.1162	ENSDART00000132379.1	86.08	2e-10	69.9
on.mrna.LG1.194.39	m.1211	ENSDART00000132379.1	86.08	2e-10	69.9
on.mrna.LG1.194.4	m.1266	ENSDART00000132379.1	86.08	2e-10	69.9
on.mrna.LG1.194.40	m.1196	ENSDART00000132379.1	86.08	2e-10	69.9
on.mrna.LG1.194.41	m.1240	ENSDART00000132379.1	86.08	2e-10	69.9
on.mrna.LG1.194.42	m.1176	ENSDART00000132379.1	86.08	2e-10	69.9
on.mrna.LG1.194.43	m.1274	ENSDART00000132379.1	86.08	2e-10	69.9
on.mrna.LG1.194.44	m.1217	ENSDART00000132379.1	86.08	2e-10	69.9
on.mrna.LG1.194.45	m.1201	ENSDART00000132379.1	86.08	2e-10	69.9
on.mrna.LG1.194.46	m.1144	ENSDART00000132379.1	86.08	2e-10	69.9
on.mrna.LG1.194.47	m.1170	ENSDART00000132379.1	86.08	2e-10	69.9
on.mrna.LG1.194.48	m.1260	ENSDART00000132379.1	86.08	2e-10	69.9
on.mrna.LG1.194.49	m.1156	ENSDART00000132379.1	86.08	2e-10	69.9
on.mrna.LG1.194.5	m.1180	ENSDART00000132379.1	86.08	2e-10	69.9
on.mrna.LG1.194.50	m.1183	ENSDART00000132379.1	86.08	2e-10	69.9
on.mrna.LG1.194.51	m.1141	ENSDART00000132379.1	86.08	2e-10	69.9
on.mrna.LG1.194.52	m.1270	ENSDART00000132379.1	86.08	2e-10	69.9
on.mrna.LG1.194.53	m.1223	ENSDART00000132379.1	86.08	2e-10	69.9
on.mrna.LG1.194.54	m.1244	ENSDART00000132379.1	86.08	2e-10	69.9
on.mrna.LG1.194.55	m.1238	ENSDART00000132379.1	86.08	2e-10	69.9
on.mrna.LG1.194.6	m.1214	ENSDART00000132379.1	86.08	2e-10	69.9
on.mrna.LG1.194.7	m.1229	ENSDART00000132379.1	86.08	2e-10	69.9
on.mrna.LG1.194.8	m.1250	ENSDART00000132379.1	86.08	2e-10	69.9
on.mrna.LG1.194.9	m.1198	ENSDART00000132379.1	86.08	2e-10	69.9
on.mrna.LG1.1940001.1	m.898	ENSDART00000101977.4	89.36	3e-06	54
on.mrna.LG1.195.1	m.4436	ENSDART00000114975.3	82.35	1e-13	79.8
on.mrna.LG1.196.1	m.3718	ENSDART00000046094.5	81.95	4e-69	262
on.mrna.LG1.196.2	m.3719	ENSDART00000046094.5	81.95	4e-69	262
on.mrna.LG1.197.1	m.3526	ENSDART00000042984.6	85.57	2e-38	163
on.mrna.LG1.197.2	m.3529	ENSDART00000042984.6	85.57	2e-38	163
on.mrna.LG1.1970001.1	m.3505	ENSDART00000131664.2	96.3	0.001	46.1
on.mrna.LG1.1970001.2	m.3506	ENSDART00000131664.2	96.3	0.001	46.1
on.mrna.LG1.198.1	m.4319	ENSDART00000016417.8	87.8	1e-65	250
on.mrna.LG1.198.1	m.4320	ENSDART00000016417.8	87.8	1e-65	250
on.mrna.LG1.198.2	m.4316	ENSDART00000016417.8	87.8	1e-65	250
on.mrna.LG1.198.2	m.4317	ENSDART00000016417.8	87.8	1e-65	250
on.mrna.LG1.198.3	m.4313	ENSDART00000016417.8	87.8	1e-65	250
on.mrna.LG1.198.3	m.4314	ENSDART00000016417.8	87.8	1e-65	250
on.mrna.LG1.199.1	m.1011	ENSDART00000073735.2	80.23	1e-76	287
on.mrna.LG1.199.2	m.1012	ENSDART00000073735.2	80.98	4e-48	192
on.mrna.LG1.199.3	m.1013	ENSDART00000073735.2	80.23	1e-76	287
on.mrna.LG1.2.1	m.5630	ENSDART00000084530.5	80.43	3e-62	240
on.mrna.LG1.2.2	m.5628	ENSDART00000084530.5	79.11	4e-84	313
on.mrna.LG1.2.3	m.5631	ENSDART00000084530.5	79.11	4e-84	313
on.mrna.LG1.20.1	m.4810	ENSDART00000067514.5	82.85	4e-94	345
on.mrna.LG1.20.10	m.4812	ENSDART00000067514.5	82.82	2e-81	303
on.mrna.LG1.20.11	m.4808	ENSDART00000067514.5	82.82	2e-81	303
on.mrna.LG1.20.12	m.4804	ENSDART00000006619.7	88.26	9e-74	278
on.mrna.LG1.20.13	m.4799	ENSDART00000006619.7	87.5	8e-24	111
on.mrna.LG1.20.14	m.4803	ENSDART00000006619.7	87.5	9e-24	111
on.mrna.LG1.20.2	m.4801	ENSDART00000067514.5	82.85	6e-94	345
on.mrna.LG1.20.3	m.4809	ENSDART00000067514.5	82.85	4e-94	345
on.mrna.LG1.20.4	m.4802	ENSDART00000067514.5	82.82	1e-81	303
on.mrna.LG1.20.5	m.4811	ENSDART00000067514.5	82.82	1e-81	303
on.mrna.LG1.20.6	m.4807	ENSDART00000067514.5	82.82	2e-81	303
on.mrna.LG1.20.7	m.4800	ENSDART00000067514.5	82.85	6e-94	345
on.mrna.LG1.20.8	m.4805	ENSDART00000134832.1	87.18	2e-24	113
on.mrna.LG1.20.9	m.4806	ENSDART00000134832.1	87.18	2e-24	113
on.mrna.LG1.200.1	m.4189	ENSDART00000165077.2	81.38	9e-43	176
on.mrna.LG1.200.2	m.4200	ENSDART00000165077.2	82.12	5e-41	170
on.mrna.LG1.200.3	m.4207	ENSDART00000165077.2	81.38	7e-43	176
on.mrna.LG1.201.1	m.3893	ENSDART00000065092.6	100	2.2	34.2
on.mrna.LG1.201.2	m.3891	ENSDART00000066380.5	79.44	0.17	38.2
on.mrna.LG1.202.1	m.248	ENSDART00000019270.7	80.75	4e-78	293
on.mrna.LG1.202.2	m.245	ENSDART00000019270.7	81.06	2e-42	174
on.mrna.LG1.202.3	m.250	ENSDART00000019270.7	80.75	3e-78	293
on.mrna.LG1.202.4	m.247	ENSDART00000019270.7	80.75	2e-78	293
on.mrna.LG1.203.1	m.2712	ENSDART00000098976.3	91.18	0.006	44.1
on.mrna.LG1.204.1	m.1579	ENSDART00000037850.7	79.91	2e-116	420
on.mrna.LG1.204.2	m.1583	ENSDART00000037850.7	79.91	2e-116	420
on.mrna.LG1.204.3	m.1581	ENSDART00000037850.7	79.91	2e-116	420
on.mrna.LG1.205.1	m.441	ENSDART00000005033.9	83.12	3e-05	50.1
on.mrna.LG1.206.1	m.3790	ENSDART00000012457.6	100	1.1	34.2
on.mrna.LG1.206.2	m.3791	ENSDART00000012457.6	100	1.4	34.2
on.mrna.LG1.207.1	m.6069	ENSDART00000149478.2	77.94	4e-19	97.6
on.mrna.LG1.208.1	m.2115	ENSDART00000171736.1	82.2	8e-61	234
on.mrna.LG1.208.2	m.2113	ENSDART00000171736.1	81.63	4e-37	155
on.mrna.LG1.209.1	m.3954	ENSDART00000021009.8	84.01	2e-74	281
on.mrna.LG1.209.2	m.3951	ENSDART00000021009.8	84.01	2e-74	281
on.mrna.LG1.209.3	m.3957	ENSDART00000021009.8	84.01	2e-74	281
on.mrna.LG1.209.4	m.3948	ENSDART00000021009.8	84.01	2e-74	281
on.mrna.LG1.21.1	m.1101	ENSDART00000067512.6	82.91	4e-138	492
on.mrna.LG1.210.1	m.5216	ENSDART00000082780.5	81.3	8e-27	123
on.mrna.LG1.210.2	m.5214	ENSDART00000082780.5	81.3	8e-27	123
on.mrna.LG1.211.1	m.6017	ENSDART00000098453.3	84.03	2e-15	85.7
on.mrna.LG1.211.2	m.6013	ENSDART00000098453.3	82.09	1e-23	113
on.mrna.LG1.212.1	m.1860	ENSDART00000098438.4	81.41	0	954
on.mrna.LG1.213.1	m.4857	ENSDART00000073594.4	83.86	0	850
on.mrna.LG1.215.1	m.517	ENSDART00000112483.3	85.27	2e-21	105
on.mrna.LG1.216.1	m.4324	ENSDART00000161256.1	96	0.018	42.1
on.mrna.LG1.217.1	m.2238	ENSDART00000020851.8	84.06	7e-20	99.6
on.mrna.LG1.219.1	m.3366	ENSDART00000073597.3	96.15	0.003	44.1
on.mrna.LG1.22.1	m.4174	ENSDART00000148995.1	79.15	8e-32	139
on.mrna.LG1.220.1	m.2941	ENSDART00000073596.6	82.42	7e-97	355
on.mrna.LG1.220.2	m.2944	ENSDART00000073596.6	82.42	8e-97	355
on.mrna.LG1.220.3	m.2943	ENSDART00000073596.6	82.42	6e-97	355
on.mrna.LG1.221.1	m.2577	ENSDART00000004782.7	80.23	3e-54	214
on.mrna.LG1.222.1	m.3590	ENSDART00000066806.5	88.14	1e-08	61.9
on.mrna.LG1.222.2	m.3589	ENSDART00000066806.5	88.14	9e-09	61.9
on.mrna.LG1.222.3	m.3591	ENSDART00000066806.5	88.14	8e-09	61.9
on.mrna.LG1.223.1	m.6103	ENSDART00000027329.7	81.13	4e-60	232
on.mrna.LG1.223.2	m.6102	ENSDART00000027329.7	81.13	4e-60	232
on.mrna.LG1.224.1	m.5380	ENSDART00000029646.6	91.55	1e-18	93.7
on.mrna.LG1.224.2	m.5381	ENSDART00000029646.6	91.55	1e-18	93.7
on.mrna.LG1.225.1	m.1041	ENSDART00000035710.5	84.17	8e-108	391
on.mrna.LG1.225.2	m.1039	ENSDART00000035710.5	84.17	8e-108	391
on.mrna.LG1.226.1	m.213	ENSDART00000014843.5	89.74	8e-155	547
on.mrna.LG1.226.2	m.208	ENSDART00000014843.5	89.74	9e-155	547
on.mrna.LG1.226.3	m.212	ENSDART00000014843.5	89.74	8e-155	547
on.mrna.LG1.226.4	m.211	ENSDART00000014843.5	89.74	8e-155	547
on.mrna.LG1.226.5	m.209	ENSDART00000014843.5	89.74	8e-155	547
on.mrna.LG1.226.6	m.210	ENSDART00000014843.5	89.74	8e-155	547
on.mrna.LG1.227.1	m.3205	ENSDART00000023568.9	78.14	9e-34	147
on.mrna.LG1.227.2	m.3202	ENSDART00000023568.9	78.14	9e-34	147
on.mrna.LG1.228.1	m.2145	ENSDART00000123463.2	88.54	7e-41	168
on.mrna.LG1.228.2	m.2143	ENSDART00000123463.2	88.54	7e-41	168
on.mrna.LG1.228.3	m.2141	ENSDART00000123463.2	88.54	1e-40	168
on.mrna.LG1.228.4	m.2139	ENSDART00000123463.2	88.54	1e-40	168
on.mrna.LG1.229.1	m.3934	ENSDART00000011858.7	100	5.1	34.2
on.mrna.LG1.23.1	m.5785	ENSDART00000067510.4	81.85	2e-36	153
on.mrna.LG1.231.1	m.1848	ENSDART00000043554.3	100	0.02	40.1
on.mrna.LG1.233.1	m.3542	ENSDART00000085419.4	90.14	3e-15	85.7
on.mrna.LG1.234.1	m.4366	ENSDART00000122506.2	77.49	1e-82	309
on.mrna.LG1.234.2	m.4368	ENSDART00000122506.2	77.49	1e-82	309
on.mrna.LG1.2340001.1	m.3865	ENSDART00000002453.7	100	0.31	36.2
on.mrna.LG1.235.1	m.4186	ENSDART00000022634.6	100	1.3	34.2
on.mrna.LG1.236.1	m.2648	ENSDART00000121972.3	79.23	0.003	44.1
on.mrna.LG1.236.2	m.2652	ENSDART00000166797.1	100	0.004	44.1
on.mrna.LG1.236.3	m.2650	ENSDART00000166797.1	100	0.004	44.1
on.mrna.LG1.236.4	m.2654	ENSDART00000166797.1	100	0.004	44.1
on.mrna.LG1.236.5	m.2656	ENSDART00000166797.1	100	0.004	44.1
on.mrna.LG1.237.1	m.308	ENSDART00000126565.3	89.58	8e-07	56
on.mrna.LG1.238.1	m.1585	ENSDART00000027119.8	100	4.9	34.2
on.mrna.LG1.239.1	m.4018	ENSDART00000099871.4	84	1e-16	89.7
on.mrna.LG1.239.1	m.4019	ENSDART00000099871.4	84.13	3e-17	91.7
on.mrna.LG1.239.2	m.4013	ENSDART00000099871.4	84	1e-16	89.7
on.mrna.LG1.239.2	m.4014	ENSDART00000099871.4	84.13	3e-17	91.7
on.mrna.LG1.239.3	m.4023	ENSDART00000099871.4	84	8e-17	89.7
on.mrna.LG1.239.3	m.4024	ENSDART00000099871.4	84.13	2e-17	91.7
on.mrna.LG1.240.1	m.565	ENSDART00000099919.4	80.28	2e-87	325
on.mrna.LG1.240.2	m.568	ENSDART00000099919.4	80.28	2e-87	325
on.mrna.LG1.241.1	m.3192	ENSDART00000111388.4	83.33	0.002	44.1
on.mrna.LG1.244.1	m.3720	ENSDART00000075398.6	78.14	8e-75	283
on.mrna.LG1.245.1	m.5524	ENSDART00000124820.3	85.96	0.0003	50.1
on.mrna.LG1.245.2	m.5513	ENSDART00000124820.3	85.96	0.0003	50.1
on.mrna.LG1.246.1	m.2382	ENSDART00000085505.6	81.59	1e-90	335
on.mrna.LG1.246.2	m.2383	ENSDART00000085505.6	81.59	1e-90	335
on.mrna.LG1.246.3	m.2384	ENSDART00000085505.6	81.59	1e-90	335
on.mrna.LG1.246.4	m.2386	ENSDART00000085505.6	81.59	1e-90	335
on.mrna.LG1.246.5	m.2385	ENSDART00000085505.6	81.59	1e-90	335
on.mrna.LG1.248.1	m.2736	ENSDART00000114148.4	80.6	4e-39	163
on.mrna.LG1.249.1	m.354	ENSDART00000169462.2	90.59	3e-21	105
on.mrna.LG1.249.2	m.358	ENSDART00000169462.2	90.59	2e-21	105
on.mrna.LG1.249.3	m.362	ENSDART00000169462.2	90.59	2e-21	105
on.mrna.LG1.25.1	m.2486	ENSDART00000083539.5	79.24	3e-50	202
on.mrna.LG1.25.1	m.2487	ENSDART00000167453.1	79.82	1e-76	289
on.mrna.LG1.250.1	m.1806	ENSDART00000173937.1	85.07	7e-90	333
on.mrna.LG1.250.2	m.1794	ENSDART00000108721.3	85.49	7e-118	426
on.mrna.LG1.250.3	m.1810	ENSDART00000173937.1	85.07	7e-90	333
on.mrna.LG1.250.4	m.1798	ENSDART00000173937.1	85.07	6e-90	333
on.mrna.LG1.250.5	m.1802	ENSDART00000173937.1	85.07	5e-90	333
on.mrna.LG1.251.1	m.5105	ENSDART00000108721.3	82.23	7e-32	139
on.mrna.LG1.251.2	m.5104	ENSDART00000108721.3	82.23	5e-32	139
on.mrna.LG1.252.1	m.2629	ENSDART00000075421.4	79.44	1e-39	165
on.mrna.LG1.252.2	m.2628	ENSDART00000075421.4	79.03	8e-32	139
on.mrna.LG1.253.1	m.479	ENSDART00000085661.5	87.79	9e-31	137
on.mrna.LG1.253.2	m.495	ENSDART00000085661.5	87.79	9e-31	137
on.mrna.LG1.253.3	m.487	ENSDART00000085661.5	87.79	9e-31	137
on.mrna.LG1.253.4	m.471	ENSDART00000085661.5	87.79	9e-31	137
on.mrna.LG1.253.5	m.463	ENSDART00000085661.5	87.79	9e-31	137
on.mrna.LG1.255.1	m.1972	ENSDART00000091616.7	84.44	4e-41	168
on.mrna.LG1.255.2	m.1974	ENSDART00000091616.7	84.44	4e-41	168
on.mrna.LG1.255.3	m.1973	ENSDART00000091616.7	84.44	4e-41	168
on.mrna.LG1.256.1	m.5587	ENSDART00000049230.7	96.55	8e-05	50.1
on.mrna.LG1.256.2	m.5601	ENSDART00000049230.7	96.55	8e-05	50.1
on.mrna.LG1.256.3	m.5598	ENSDART00000049230.7	96.55	8e-05	50.1
on.mrna.LG1.256.4	m.5594	ENSDART00000050871.4	100	0.76	36.2
on.mrna.LG1.256.5	m.5604	ENSDART00000050871.4	100	0.89	36.2
on.mrna.LG1.256.6	m.5590	ENSDART00000050871.4	100	0.98	36.2
on.mrna.LG1.256.7	m.5591	ENSDART00000049230.7	96.55	8e-05	50.1
on.mrna.LG1.256.8	m.5595	ENSDART00000049230.7	96.55	8e-05	50.1
on.mrna.LG1.257.1	m.1109	ENSDART00000091567.5	79.19	2e-179	630
on.mrna.LG1.257.2	m.1111	ENSDART00000166318.1	79.09	0	680
on.mrna.LG1.257.3	m.1116	ENSDART00000166318.1	79.32	0	678
on.mrna.LG1.2570001.1	m.1062	ENSDART00000090675.4	100	0.007	42.1
on.mrna.LG1.258.1	m.3711	ENSDART00000079165.5	80.95	0	1003
on.mrna.LG1.259.1	m.5734	ENSDART00000124363.3	86.06	2e-63	244
on.mrna.LG1.26.1	m.1975	ENSDART00000126397.3	82.69	2e-09	63.9
on.mrna.LG1.260.1	m.5192	ENSDART00000101018.5	82.48	3e-14	81.8
on.mrna.LG1.260.2	m.5188	ENSDART00000101018.5	82.48	3e-14	81.8
on.mrna.LG1.260.3	m.5191	ENSDART00000101018.5	82.48	3e-14	81.8
on.mrna.LG1.260.4	m.5189	ENSDART00000101018.5	82.48	3e-14	81.8
on.mrna.LG1.260.5	m.5186	ENSDART00000101018.5	82.48	3e-14	81.8
on.mrna.LG1.260.6	m.5190	ENSDART00000101018.5	82.48	3e-14	81.8
on.mrna.LG1.260.7	m.5187	ENSDART00000101018.5	82.48	3e-14	81.8
on.mrna.LG1.261.1	m.4240	ENSDART00000052731.6	87.85	2e-23	109
on.mrna.LG1.261.2	m.4241	ENSDART00000052731.6	80.64	1e-127	458
on.mrna.LG1.261.3	m.4245	ENSDART00000052731.6	80.64	1e-127	458
on.mrna.LG1.262.1	m.3417	ENSDART00000110605.3	84.07	5e-29	131
on.mrna.LG1.262.10	m.3403	ENSDART00000110605.3	95.83	3e-25	119
on.mrna.LG1.262.11	m.3420	ENSDART00000110605.3	95.83	2e-25	119
on.mrna.LG1.262.12	m.3400	ENSDART00000110605.3	95.83	2e-25	119
on.mrna.LG1.262.13	m.3402	ENSDART00000110605.3	90.91	6e-15	83.8
on.mrna.LG1.262.14	m.3401	ENSDART00000110605.3	90.91	8e-15	83.8
on.mrna.LG1.262.15	m.3399	ENSDART00000110605.3	86.84	2e-11	71.9
on.mrna.LG1.262.2	m.3411	ENSDART00000110605.3	84.07	5e-29	131
on.mrna.LG1.262.3	m.3397	ENSDART00000110605.3	84.07	5e-29	131
on.mrna.LG1.262.4	m.3409	ENSDART00000110605.3	84.07	7e-29	131
on.mrna.LG1.262.5	m.3413	ENSDART00000110605.3	84.07	7e-29	131
on.mrna.LG1.262.6	m.3423	ENSDART00000110605.3	84.07	7e-29	131
on.mrna.LG1.262.7	m.3421	ENSDART00000110605.3	84.07	8e-29	131
on.mrna.LG1.262.8	m.3415	ENSDART00000110605.3	84.07	8e-29	131
on.mrna.LG1.262.9	m.3406	ENSDART00000110605.3	95.83	2e-25	119
on.mrna.LG1.263.1	m.2741	ENSDART00000100998.3	80.88	0	682
on.mrna.LG1.263.2	m.2750	ENSDART00000100998.3	80.88	0	682
on.mrna.LG1.263.3	m.2747	ENSDART00000100998.3	81.13	0	728
on.mrna.LG1.263.4	m.2738	ENSDART00000100998.3	80.88	0	682
on.mrna.LG1.263.5	m.2744	ENSDART00000100998.3	80.88	0	682
on.mrna.LG1.264.1	m.3133	ENSDART00000011715.8	100	1.3	34.2
on.mrna.LG1.265.1	m.2432	ENSDART00000157410.1	100	1.3	36.2
on.mrna.LG1.265.1	m.2434	ENSDART00000157410.1	100	1	36.2
on.mrna.LG1.265.2	m.2414	ENSDART00000157410.1	100	0.88	36.2
on.mrna.LG1.265.3	m.2405	ENSDART00000157410.1	100	1.2	36.2
on.mrna.LG1.265.3	m.2407	ENSDART00000157410.1	100	0.94	36.2
on.mrna.LG1.265.4	m.2423	ENSDART00000157410.1	100	0.88	36.2
on.mrna.LG1.266.1	m.628	ENSDART00000173932.1	81.8	7e-149	529
on.mrna.LG1.267.1	m.1562	ENSDART00000079042.6	83.02	0	1788
on.mrna.LG1.267.2	m.1535	ENSDART00000079042.6	83.2	0	1695
on.mrna.LG1.267.3	m.1546	ENSDART00000079042.6	83.03	0	1750
on.mrna.LG1.267.4	m.1573	ENSDART00000079042.6	83.2	0	1695
on.mrna.LG1.267.5	m.1541	ENSDART00000079042.6	83.02	0	1788
on.mrna.LG1.267.6	m.1556	ENSDART00000079042.6	83.2	0	1695
on.mrna.LG1.267.7	m.1551	ENSDART00000079042.6	83.03	0	1750
on.mrna.LG1.267.8	m.1567	ENSDART00000079042.6	83.2	0	1695
on.mrna.LG1.268.1	m.3642	ENSDART00000052656.5	84.39	4e-125	448
on.mrna.LG1.268.2	m.3644	ENSDART00000052656.5	84.9	7e-86	317
on.mrna.LG1.268.3	m.3645	ENSDART00000052656.5	84.9	7e-86	317
on.mrna.LG1.269.1	m.4941	ENSDART00000089574.6	83.03	9e-42	172
on.mrna.LG1.269.2	m.4929	ENSDART00000089574.6	83.03	9e-42	172
on.mrna.LG1.269.3	m.4935	ENSDART00000089574.6	83.03	8e-42	172
on.mrna.LG1.269.4	m.4924	ENSDART00000089574.6	83.03	6e-42	172
on.mrna.LG1.27.1	m.2635	ENSDART00000174354.1	84.21	0	1217
on.mrna.LG1.27.2	m.2645	ENSDART00000111161.3	83.77	0	1015
on.mrna.LG1.27.3	m.2640	ENSDART00000174354.1	84.21	0	1217
on.mrna.LG1.270.1	m.2110	ENSDART00000173842.1	88.33	6e-09	63.9
on.mrna.LG1.271.1	m.3648	ENSDART00000044208.5	93.61	0	646
on.mrna.LG1.271.2	m.3646	ENSDART00000044208.5	93.8	0	698
on.mrna.LG1.273.1	m.3592	ENSDART00000054368.4	81.24	0	708
on.mrna.LG1.274.1	m.4223	ENSDART00000028887.6	83.57	2e-62	240
on.mrna.LG1.275.1	m.326	ENSDART00000054366.7	81.5	9e-89	329
on.mrna.LG1.275.2	m.333	ENSDART00000054366.7	82.87	6e-37	157
on.mrna.LG1.275.3	m.322	ENSDART00000054366.7	80.97	8e-93	343
on.mrna.LG1.275.4	m.329	ENSDART00000054366.7	80.97	7e-93	343
on.mrna.LG1.277.1	m.5807	ENSDART00000060545.6	83.23	2e-117	424
on.mrna.LG1.278.1	m.3543	ENSDART00000098277.4	79.27	1e-45	184
on.mrna.LG1.278.2	m.3547	ENSDART00000098277.4	81.39	5e-32	139
on.mrna.LG1.278.3	m.3545	ENSDART00000098277.4	79.27	1e-45	184
on.mrna.LG1.279.1	m.3656	ENSDART00000108471.2	82.77	0	1542
on.mrna.LG1.279.2	m.3666	ENSDART00000108471.2	82.77	0	1542
on.mrna.LG1.279.3	m.3671	ENSDART00000108471.2	82.06	0	1544
on.mrna.LG1.279.4	m.3661	ENSDART00000108471.2	82.06	0	1544
on.mrna.LG1.280.1	m.3521	ENSDART00000100105.5	82.04	9e-25	115
on.mrna.LG1.280.2	m.3519	ENSDART00000100105.5	82.04	2e-24	115
on.mrna.LG1.281.1	m.2786	ENSDART00000082664.5	78.4	0	696
on.mrna.LG1.281.2	m.2783	ENSDART00000082664.5	80.85	0	648
on.mrna.LG1.281.3	m.2792	ENSDART00000082664.5	78.4	0	696
on.mrna.LG1.281.4	m.2795	ENSDART00000082664.5	80.85	0	648
on.mrna.LG1.281.5	m.2789	ENSDART00000082664.5	80.85	0	648
on.mrna.LG1.2810001.1	m.1305	ENSDART00000155954.1	100	0.002	44.1
on.mrna.LG1.283.1	m.4129	ENSDART00000003612.7	83.85	1e-44	182
on.mrna.LG1.2830001.1	m.5110	ENSDART00000056614.7	100	0.63	36.2
on.mrna.LG1.2830001.2	m.5109	ENSDART00000056614.7	100	0.69	36.2
on.mrna.LG1.2830001.3	m.5111	ENSDART00000160000.1	100	0.52	36.2
on.mrna.LG1.284.1	m.507	ENSDART00000114427.3	88.18	4e-24	115
on.mrna.LG1.285.1	m.1725	ENSDART00000021317.8	83.88	0	1855
on.mrna.LG1.285.2	m.1721	ENSDART00000021317.8	83.88	0	1855
on.mrna.LG1.285.3	m.1729	ENSDART00000021317.8	83.88	0	1855
on.mrna.LG1.286.1	m.2330	ENSDART00000027616.8	84.81	0	737
on.mrna.LG1.286.2	m.2325	ENSDART00000027616.8	84.81	0	737
on.mrna.LG1.287.1	m.2659	ENSDART00000082604.4	80.18	9e-135	482
on.mrna.LG1.288.1	m.2107	ENSDART00000154961.1	82.18	1e-148	527
on.mrna.LG1.288.2	m.2105	ENSDART00000154961.1	82.18	1e-148	527
on.mrna.LG1.288.3	m.2106	ENSDART00000154961.1	82.18	1e-148	527
on.mrna.LG1.288.4	m.2108	ENSDART00000154961.1	82.18	1e-148	527
on.mrna.LG1.288.5	m.2104	ENSDART00000154961.1	82.18	1e-148	527
on.mrna.LG1.2880001.1	m.338	ENSDART00000102525.4	100	0.4	36.2
on.mrna.LG1.289.1	m.3914	ENSDART00000082740.5	83.88	0	660
on.mrna.LG1.289.2	m.3923	ENSDART00000150143.2	83.98	0	833
on.mrna.LG1.289.3	m.3920	ENSDART00000150143.2	83.98	0	833
on.mrna.LG1.29.1	m.3838	ENSDART00000099333.5	84.27	6e-10	65.9
on.mrna.LG1.29.2	m.3841	ENSDART00000138661.2	84.38	1e-11	71.9
on.mrna.LG1.29.3	m.3840	ENSDART00000138661.2	84.38	1e-11	71.9
on.mrna.LG1.290.1	m.2125	ENSDART00000156301.2	79.04	2e-90	335
on.mrna.LG1.290.10	m.2127	ENSDART00000082679.5	83.1	9e-49	196
on.mrna.LG1.290.2	m.2128	ENSDART00000156301.2	79.04	2e-90	335
on.mrna.LG1.290.3	m.2118	ENSDART00000156301.2	79.04	2e-90	335
on.mrna.LG1.290.4	m.2121	ENSDART00000156301.2	79.04	2e-90	335
on.mrna.LG1.290.5	m.2123	ENSDART00000156301.2	79.04	2e-90	335
on.mrna.LG1.290.6	m.2116	ENSDART00000156301.2	79.04	2e-90	335
on.mrna.LG1.290.7	m.2132	ENSDART00000156301.2	79.04	2e-90	335
on.mrna.LG1.290.8	m.2135	ENSDART00000156301.2	79.04	2e-90	335
on.mrna.LG1.290.9	m.2131	ENSDART00000082679.5	83.1	1e-48	196
on.mrna.LG1.293.1	m.4576	ENSDART00000084282.6	100	0.69	36.2
on.mrna.LG1.293.2	m.4574	ENSDART00000002777.9	100	1.9	34.2
on.mrna.LG1.294.1	m.2069	ENSDART00000166109.1	81.97	0	1118
on.mrna.LG1.294.2	m.2080	ENSDART00000166109.1	81.97	0	1118
on.mrna.LG1.294.3	m.2094	ENSDART00000166109.1	81.97	0	1118
on.mrna.LG1.294.4	m.2075	ENSDART00000166109.1	81.97	0	1118
on.mrna.LG1.294.5	m.2090	ENSDART00000166109.1	81.99	0	827
on.mrna.LG1.294.6	m.2085	ENSDART00000166109.1	81.97	0	1118
on.mrna.LG1.295.1	m.3208	ENSDART00000160374.1	82.35	4e-05	50.1
on.mrna.LG1.296.1	m.4374	ENSDART00000021299.7	100	4.2	34.2
on.mrna.LG1.296.1	m.4375	ENSDART00000021299.7	100	4.2	34.2
on.mrna.LG1.296.2	m.4370	ENSDART00000021299.7	100	3.2	34.2
on.mrna.LG1.296.2	m.4371	ENSDART00000021299.7	100	3.2	34.2
on.mrna.LG1.297.1	m.3947	ENSDART00000162693.1	82.61	9e-20	97.6
on.mrna.LG1.298.1	m.400	ENSDART00000173234.1	81.31	3e-05	54
on.mrna.LG1.298.1	m.402	ENSDART00000173234.1	81.31	7e-06	54
on.mrna.LG1.298.2	m.386	ENSDART00000173234.1	81.31	3e-05	54
on.mrna.LG1.298.2	m.388	ENSDART00000173234.1	81.31	6e-06	54
on.mrna.LG1.299.1	m.5625	ENSDART00000167564.1	90.12	2e-19	97.6
on.mrna.LG1.300.1	m.443	ENSDART00000170575.1	88.24	5e-06	54
on.mrna.LG1.300.2	m.444	ENSDART00000170575.1	88.24	5e-06	54
on.mrna.LG1.301.1	m.4823	ENSDART00000066445.5	100	4.7	34.2
on.mrna.LG1.302.1	m.3945	ENSDART00000162553.1	81.62	0	825
on.mrna.LG1.302.2	m.3946	ENSDART00000162553.1	81.62	0	825
on.mrna.LG1.304.1	m.3853	ENSDART00000168460.1	85.44	1e-147	523
on.mrna.LG1.304.2	m.3852	ENSDART00000168460.1	85.44	1e-147	523
on.mrna.LG1.304.3	m.3854	ENSDART00000168460.1	85.44	9e-148	523
on.mrna.LG1.304.4	m.3855	ENSDART00000168460.1	85.44	9e-148	523
on.mrna.LG1.307.1	m.6001	ENSDART00000172015.1	84.54	2e-34	147
on.mrna.LG1.308.1	m.590	ENSDART00000162978.1	81.43	0	1386
on.mrna.LG1.308.2	m.584	ENSDART00000162978.1	81.43	0	1386
on.mrna.LG1.308.3	m.587	ENSDART00000162978.1	81.43	0	1386
on.mrna.LG1.309.1	m.2246	ENSDART00000171225.1	100	0.38	36.2
on.mrna.LG1.31.1	m.2046	ENSDART00000001376.6	82.61	2e-19	97.6
on.mrna.LG1.31.2	m.2045	ENSDART00000001376.6	82.61	1e-19	97.6
on.mrna.LG1.310.1	m.2730	ENSDART00000167440.1	80.39	0	654
on.mrna.LG1.311.1	m.2457	ENSDART00000129135.2	100	0.063	38.2
on.mrna.LG1.313.1	m.5844	ENSDART00000161319.1	82.26	0	710
on.mrna.LG1.314.1	m.5031	ENSDART00000114260.4	100	0.95	38.2
on.mrna.LG1.314.1	m.5032	ENSDART00000159205.1	84.31	0.89	38.2
on.mrna.LG1.315.1	m.4847	ENSDART00000170714.1	82.77	0	1520
on.mrna.LG1.315.2	m.4842	ENSDART00000170714.1	83.07	0	1572
on.mrna.LG1.315.3	m.4852	ENSDART00000170714.1	83.07	0	1572
on.mrna.LG1.316.1	m.976	ENSDART00000122902.2	100	0.083	40.1
on.mrna.LG1.316.10	m.983	ENSDART00000122902.2	100	0.079	40.1
on.mrna.LG1.316.2	m.990	ENSDART00000149903.2	100	0.071	40.1
on.mrna.LG1.316.3	m.998	ENSDART00000122902.2	100	0.082	40.1
on.mrna.LG1.316.4	m.993	ENSDART00000122902.2	100	0.03	40.1
on.mrna.LG1.316.5	m.987	ENSDART00000149903.2	100	0.071	40.1
on.mrna.LG1.316.6	m.980	ENSDART00000149903.2	100	0.071	40.1
on.mrna.LG1.316.7	m.1002	ENSDART00000122902.2	100	0.084	40.1
on.mrna.LG1.316.8	m.995	ENSDART00000122902.2	100	0.079	40.1
on.mrna.LG1.316.9	m.986	ENSDART00000122902.2	100	0.027	40.1
on.mrna.LG1.3160001.1	m.3706	ENSDART00000149903.2	100	0.025	40.1
on.mrna.LG1.317.1	m.172	ENSDART00000127351.2	83.8	5e-35	151
on.mrna.LG1.318.1	m.3159	ENSDART00000085716.6	80.38	1e-23	113
on.mrna.LG1.319.1	m.2615	ENSDART00000052539.6	81.81	0	1334
on.mrna.LG1.319.2	m.2624	ENSDART00000052539.6	81.81	0	1334
on.mrna.LG1.319.3	m.2621	ENSDART00000052539.6	81.81	0	1334
on.mrna.LG1.319.4	m.2612	ENSDART00000052539.6	81.81	0	1334
on.mrna.LG1.319.5	m.2618	ENSDART00000052539.6	81.81	0	1334
on.mrna.LG1.32.1	m.3691	ENSDART00000170935.2	80.55	2e-129	464
on.mrna.LG1.32.2	m.3692	ENSDART00000170935.2	80.55	2e-129	464
on.mrna.LG1.32.3	m.3690	ENSDART00000170935.2	80.55	2e-129	464
on.mrna.LG1.321.1	m.5959	ENSDART00000166046.1	81.71	1e-94	349
on.mrna.LG1.321.10	m.5980	ENSDART00000111626.3	82.65	7e-115	416
on.mrna.LG1.321.11	m.5992	ENSDART00000166046.1	80.78	1e-63	246
on.mrna.LG1.321.12	m.5974	ENSDART00000166046.1	82.66	5e-131	470
on.mrna.LG1.321.13	m.5986	ENSDART00000111626.3	82.65	7e-115	416
on.mrna.LG1.321.14	m.5962	ENSDART00000166046.1	80.78	1e-63	246
on.mrna.LG1.321.2	m.5983	ENSDART00000111626.3	81.55	2e-78	295
on.mrna.LG1.321.3	m.5968	ENSDART00000166046.1	81.71	1e-94	349
on.mrna.LG1.321.4	m.5989	ENSDART00000111626.3	79.78	4e-42	174
on.mrna.LG1.321.5	m.5977	ENSDART00000166046.1	80.78	1e-63	246
on.mrna.LG1.321.6	m.5971	ENSDART00000111626.3	79.78	4e-42	174
on.mrna.LG1.321.7	m.5995	ENSDART00000166046.1	80.78	1e-63	246
on.mrna.LG1.321.8	m.5998	ENSDART00000166046.1	82.66	5e-131	470
on.mrna.LG1.321.9	m.5965	ENSDART00000111626.3	79.78	4e-42	174
on.mrna.LG1.322.1	m.5370	ENSDART00000142818.3	80.85	8e-56	220
on.mrna.LG1.322.2	m.5373	ENSDART00000142818.3	80.73	3e-27	125
on.mrna.LG1.322.3	m.5376	ENSDART00000142818.3	80.85	8e-56	220
on.mrna.LG1.322.4	m.5367	ENSDART00000142818.3	80.85	8e-56	220
on.mrna.LG1.323.1	m.3994	ENSDART00000027466.9	79.95	4e-140	500
on.mrna.LG1.323.2	m.3986	ENSDART00000027466.9	79.68	9e-113	408
on.mrna.LG1.323.3	m.3983	ENSDART00000027466.9	79.95	4e-140	500
on.mrna.LG1.323.4	m.3990	ENSDART00000027466.9	79.68	9e-113	408
on.mrna.LG1.324.1	m.3370	ENSDART00000099639.7	80.65	2e-62	242
on.mrna.LG1.324.2	m.3367	ENSDART00000099639.7	80.65	2e-62	242
on.mrna.LG1.327.1	m.4735	ENSDART00000059373.3	100	0.68	36.2
on.mrna.LG1.327.2	m.4739	ENSDART00000059373.3	100	0.66	36.2
on.mrna.LG1.327.3	m.4741	ENSDART00000059373.3	100	0.74	36.2
on.mrna.LG1.327.4	m.4737	ENSDART00000059373.3	100	0.68	36.2
on.mrna.LG1.328.1	m.1909	ENSDART00000075519.5	80.03	3e-171	603
on.mrna.LG1.328.2	m.1910	ENSDART00000075519.5	80.32	2e-165	583
on.mrna.LG1.329.1	m.1018	ENSDART00000173057.1	95.83	0.038	40.1
on.mrna.LG1.329.2	m.1020	ENSDART00000108782.4	100	0.003	44.1
on.mrna.LG1.329.3	m.1019	ENSDART00000108782.4	79.7	6e-05	50.1
on.mrna.LG1.329.4	m.1017	ENSDART00000108782.4	100	0.003	44.1
on.mrna.LG1.3290001.1	m.3222	ENSDART00000110265.4	85.16	7e-34	147
on.mrna.LG1.33.1	m.4503	ENSDART00000047208.7	78.85	5e-54	214
on.mrna.LG1.33.10	m.4537	ENSDART00000173673.1	81.78	8e-128	460
on.mrna.LG1.33.11	m.4510	ENSDART00000173673.1	83	2e-180	634
on.mrna.LG1.33.12	m.4516	ENSDART00000173673.1	83.02	1e-179	632
on.mrna.LG1.33.13	m.4505	ENSDART00000047208.7	80.53	3e-93	345
on.mrna.LG1.33.14	m.4528	ENSDART00000173673.1	83	2e-180	634
on.mrna.LG1.33.15	m.4513	ENSDART00000173673.1	83	2e-180	634
on.mrna.LG1.33.16	m.4546	ENSDART00000173673.1	81.77	1e-128	462
on.mrna.LG1.33.17	m.4493	ENSDART00000047208.7	82.27	2e-165	585
on.mrna.LG1.33.18	m.4500	ENSDART00000047208.7	80.53	2e-93	345
on.mrna.LG1.33.19	m.4534	ENSDART00000173673.1	81.78	6e-128	460
on.mrna.LG1.33.2	m.4508	ENSDART00000047208.7	78.85	5e-54	214
on.mrna.LG1.33.20	m.4525	ENSDART00000047208.7	82.27	2e-165	585
on.mrna.LG1.33.21	m.4519	ENSDART00000047208.7	80.53	2e-93	345
on.mrna.LG1.33.22	m.4549	ENSDART00000173673.1	81.78	6e-128	460
on.mrna.LG1.33.3	m.4487	ENSDART00000047208.7	78.2	6e-91	337
on.mrna.LG1.33.4	m.4543	ENSDART00000047208.7	78.85	6e-54	214
on.mrna.LG1.33.5	m.4540	ENSDART00000047208.7	78.85	6e-54	214
on.mrna.LG1.33.6	m.4496	ENSDART00000047208.7	78.85	6e-54	214
on.mrna.LG1.33.7	m.4531	ENSDART00000047208.7	82.27	2e-165	585
on.mrna.LG1.33.8	m.4490	ENSDART00000047208.7	82.27	2e-165	585
on.mrna.LG1.33.9	m.4522	ENSDART00000047208.7	80.53	3e-93	345
on.mrna.LG1.330.1	m.636	ENSDART00000129769.3	86.79	4e-49	198
on.mrna.LG1.330.2	m.634	ENSDART00000129769.3	86.79	4e-49	198
on.mrna.LG1.330.3	m.632	ENSDART00000129769.3	86.79	4e-49	198
on.mrna.LG1.331.1	m.5449	ENSDART00000131282.2	83.21	1e-94	349
on.mrna.LG1.331.10	m.5468	ENSDART00000009938.10	83.01	2e-58	228
on.mrna.LG1.331.2	m.5459	ENSDART00000131282.2	83.21	9e-95	349
on.mrna.LG1.331.3	m.5476	ENSDART00000131282.2	83.21	9e-95	349
on.mrna.LG1.331.4	m.5454	ENSDART00000131282.2	83.21	9e-95	349
on.mrna.LG1.331.5	m.5481	ENSDART00000131282.2	83.21	1e-94	349
on.mrna.LG1.331.6	m.5486	ENSDART00000131282.2	83.21	9e-95	349
on.mrna.LG1.331.7	m.5491	ENSDART00000009938.10	82.94	1e-96	355
on.mrna.LG1.331.8	m.5464	ENSDART00000009938.10	82.94	1e-96	355
on.mrna.LG1.331.9	m.5472	ENSDART00000009938.10	82.94	1e-96	355
on.mrna.LG1.332.1	m.1768	ENSDART00000110906.4	80.43	3e-49	198
on.mrna.LG1.332.2	m.1765	ENSDART00000110906.4	80.43	2e-49	198
on.mrna.LG1.332.3	m.1764	ENSDART00000110906.4	80.43	3e-49	198
on.mrna.LG1.332.4	m.1763	ENSDART00000110906.4	85.43	1e-27	125
on.mrna.LG1.332.5	m.1770	ENSDART00000110906.4	80.43	2e-49	198
on.mrna.LG1.332.6	m.1771	ENSDART00000110906.4	80.43	2e-49	198
on.mrna.LG1.332.7	m.1766	ENSDART00000110906.4	80.43	2e-49	198
on.mrna.LG1.332.8	m.1767	ENSDART00000110906.4	80.43	2e-49	198
on.mrna.LG1.332.9	m.1769	ENSDART00000110906.4	80.43	2e-49	198
on.mrna.LG1.333.1	m.4123	ENSDART00000127006.2	90.91	0.021	42.1
on.mrna.LG1.333.1	m.4124	ENSDART00000127006.2	90.91	0.019	42.1
on.mrna.LG1.334.1	m.3432	ENSDART00000063775.4	95.45	0.84	36.2
on.mrna.LG1.334.2	m.3438	ENSDART00000063775.4	95.45	1	36.2
on.mrna.LG1.334.3	m.3426	ENSDART00000063775.4	95.45	0.84	36.2
on.mrna.LG1.335.1	m.2547	ENSDART00000111303.4	79.39	1e-27	127
on.mrna.LG1.335.2	m.2543	ENSDART00000166834.1	84.62	2e-10	69.9
on.mrna.LG1.335.3	m.2539	ENSDART00000166834.1	84.62	2e-10	69.9
on.mrna.LG1.335.4	m.2535	ENSDART00000166834.1	84.62	2e-10	69.9
on.mrna.LG1.336.1	m.4294	ENSDART00000159464.1	80.71	2e-112	408
on.mrna.LG1.336.2	m.4293	ENSDART00000159464.1	80.71	2e-112	408
on.mrna.LG1.3360001.1	m.3784	ENSDART00000171015.1	88	5e-05	52
on.mrna.LG1.337.1	m.125	ENSDART00000162748.1	84.78	7e-22	107
on.mrna.LG1.337.2	m.113	ENSDART00000162748.1	84.78	6e-22	107
on.mrna.LG1.337.3	m.119	ENSDART00000162748.1	84.78	7e-22	107
on.mrna.LG1.337.4	m.137	ENSDART00000162748.1	84.78	7e-22	107
on.mrna.LG1.337.5	m.101	ENSDART00000162748.1	84.78	7e-22	107
on.mrna.LG1.337.6	m.131	ENSDART00000162748.1	84.78	6e-22	107
on.mrna.LG1.337.7	m.143	ENSDART00000162748.1	84.78	7e-22	107
on.mrna.LG1.337.8	m.107	ENSDART00000162748.1	84.78	6e-22	107
on.mrna.LG1.338.1	m.646	ENSDART00000158363.1	85	1e-13	79.8
on.mrna.LG1.338.2	m.649	ENSDART00000158363.1	85	1e-13	79.8
on.mrna.LG1.339.1	m.68	ENSDART00000165301.1	85.45	5e-71	268
on.mrna.LG1.339.2	m.65	ENSDART00000165301.1	84.05	1e-75	283
on.mrna.LG1.339.3	m.64	ENSDART00000165301.1	84.05	1e-75	283
on.mrna.LG1.339.4	m.66	ENSDART00000159775.1	83.87	4e-23	109
on.mrna.LG1.339.5	m.67	ENSDART00000159775.1	84.21	2e-40	167
on.mrna.LG1.34.1	m.4905	ENSDART00000052471.4	86.57	1e-08	61.9
on.mrna.LG1.34.2	m.4904	ENSDART00000173798.1	77.8	4e-31	137
on.mrna.LG1.34.3	m.4906	ENSDART00000173798.1	77.33	2e-17	91.7
on.mrna.LG1.34.4	m.4908	ENSDART00000052471.4	80.34	9e-13	75.8
on.mrna.LG1.34.5	m.4903	ENSDART00000173798.1	77.8	4e-31	137
on.mrna.LG1.34.6	m.4902	ENSDART00000052471.4	80.34	9e-13	75.8
on.mrna.LG1.34.7	m.4909	ENSDART00000052471.4	80.34	9e-13	75.8
on.mrna.LG1.34.8	m.4907	ENSDART00000173798.1	77.8	4e-31	137
on.mrna.LG1.34.9	m.4901	ENSDART00000052471.4	80.34	9e-13	75.8
on.mrna.LG1.341.1	m.6134	ENSDART00000136657.3	87.5	4e-09	63.9
on.mrna.LG1.341.10	m.6139	ENSDART00000136657.3	87.5	6e-09	63.9
on.mrna.LG1.341.11	m.6131	ENSDART00000136657.3	87.5	6e-09	63.9
on.mrna.LG1.341.12	m.6141	ENSDART00000136657.3	87.5	5e-09	63.9
on.mrna.LG1.341.13	m.6127	ENSDART00000136657.3	87.5	6e-09	63.9
on.mrna.LG1.341.14	m.6142	ENSDART00000136657.3	87.5	6e-09	63.9
on.mrna.LG1.341.15	m.6146	ENSDART00000136657.3	87.5	5e-09	63.9
on.mrna.LG1.341.16	m.6136	ENSDART00000136657.3	87.5	6e-09	63.9
on.mrna.LG1.341.17	m.6138	ENSDART00000136657.3	93.33	0.002	44.1
on.mrna.LG1.341.2	m.6135	ENSDART00000136657.3	87.5	4e-09	63.9
on.mrna.LG1.341.3	m.6145	ENSDART00000136657.3	87.5	6e-09	63.9
on.mrna.LG1.341.4	m.6126	ENSDART00000136657.3	87.5	5e-09	63.9
on.mrna.LG1.341.5	m.6129	ENSDART00000136657.3	87.5	6e-09	63.9
on.mrna.LG1.341.6	m.6144	ENSDART00000136657.3	87.5	5e-09	63.9
on.mrna.LG1.341.7	m.6132	ENSDART00000136657.3	87.5	6e-09	63.9
on.mrna.LG1.341.8	m.6147	ENSDART00000136657.3	87.5	6e-09	63.9
on.mrna.LG1.341.9	m.6133	ENSDART00000136657.3	87.5	6e-09	63.9
on.mrna.LG1.342.1	m.5258	ENSDART00000089549.6	93.33	0.003	44.1
on.mrna.LG1.342.2	m.5263	ENSDART00000089549.6	85.71	9e-10	65.9
on.mrna.LG1.342.3	m.5270	ENSDART00000089549.6	89.83	1e-10	69.9
on.mrna.LG1.342.4	m.5259	ENSDART00000089549.6	89.83	1e-10	69.9
on.mrna.LG1.342.5	m.5265	ENSDART00000089549.6	89.83	1e-10	69.9
on.mrna.LG1.342.6	m.5268	ENSDART00000089549.6	89.83	1e-10	69.9
on.mrna.LG1.342.7	m.5261	ENSDART00000089549.6	89.83	1e-10	69.9
on.mrna.LG1.343.1	m.4219	ENSDART00000079139.3	82.58	1e-155	551
on.mrna.LG1.343.2	m.4215	ENSDART00000079139.3	82.58	1e-155	551
on.mrna.LG1.344.1	m.2705	ENSDART00000023721.7	84.76	2e-122	442
on.mrna.LG1.345.1	m.2190	ENSDART00000052345.5	82.56	1e-05	52
on.mrna.LG1.346.1	m.1082	ENSDART00000130125.2	85.34	1e-18	95.6
on.mrna.LG1.347.1	m.6076	ENSDART00000076425.4	81.54	3e-30	135
on.mrna.LG1.347.2	m.6079	ENSDART00000076425.4	81.54	3e-30	135
on.mrna.LG1.347.3	m.6074	ENSDART00000076425.4	92.77	6e-25	117
on.mrna.LG1.348.1	m.451	ENSDART00000033118.5	100	1.8	34.2
on.mrna.LG1.348.2	m.445	ENSDART00000002661.7	100	3	34.2
on.mrna.LG1.348.3	m.457	ENSDART00000082142.5	100	0.93	36.2
on.mrna.LG1.348.4	m.449	ENSDART00000149903.2	100	0.057	40.1
on.mrna.LG1.348.5	m.452	ENSDART00000149903.2	100	0.077	40.1
on.mrna.LG1.349.1	m.1747	ENSDART00000020923.8	100	0.25	38.2
on.mrna.LG1.349.2	m.1744	ENSDART00000020923.8	100	0.25	38.2
on.mrna.LG1.349.3	m.1750	ENSDART00000020923.8	100	0.25	38.2
on.mrna.LG1.35.1	m.6072	ENSDART00000123498.3	82.42	5e-84	311
on.mrna.LG1.350.1	m.4731	ENSDART00000052342.4	81.71	3e-31	137
on.mrna.LG1.350001.1	m.2812	ENSDART00000123498.3	82.42	6e-84	311
on.mrna.LG1.352.1	m.217	ENSDART00000052805.3	81.56	9e-12	73.8
on.mrna.LG1.353.1	m.2449	ENSDART00000060160.4	87.91	3e-18	93.7
on.mrna.LG1.353.2	m.2452	ENSDART00000060160.4	82.43	2e-16	87.7
on.mrna.LG1.354.1	m.4183	ENSDART00000060166.4	79.71	5e-123	442
on.mrna.LG1.354.2	m.4181	ENSDART00000060166.4	79.71	5e-123	442
on.mrna.LG1.354.3	m.4182	ENSDART00000060166.4	81.05	4e-114	412
on.mrna.LG1.355.1	m.3256	ENSDART00000026571.6	77.82	4e-19	97.6
on.mrna.LG1.355.2	m.3253	ENSDART00000026571.6	77.82	4e-19	97.6
on.mrna.LG1.355.3	m.3259	ENSDART00000026571.6	77.82	3e-19	97.6
on.mrna.LG1.356.1	m.3888	ENSDART00000073846.4	80.94	2e-29	131
on.mrna.LG1.356.2	m.3889	ENSDART00000073846.4	83.02	2e-30	135
on.mrna.LG1.357.1	m.313	ENSDART00000080904.6	100	0.045	40.1
on.mrna.LG1.357.2	m.316	ENSDART00000080904.6	100	0.051	40.1
on.mrna.LG1.357.3	m.315	ENSDART00000080904.6	100	0.051	40.1
on.mrna.LG1.357.4	m.318	ENSDART00000080904.6	100	0.045	40.1
on.mrna.LG1.357.5	m.320	ENSDART00000080904.6	100	0.045	40.1
on.mrna.LG1.357.6	m.317	ENSDART00000080904.6	100	0.047	40.1
on.mrna.LG1.357.7	m.314	ENSDART00000080904.6	100	0.047	40.1
on.mrna.LG1.358.1	m.5095	ENSDART00000065127.7	100	0.074	40.1
on.mrna.LG1.358.2	m.5098	ENSDART00000065127.7	100	0.074	40.1
on.mrna.LG1.358.3	m.5101	ENSDART00000065127.7	100	0.074	40.1
on.mrna.LG1.358.4	m.5096	ENSDART00000065127.7	100	0.079	40.1
on.mrna.LG1.358.5	m.5097	ENSDART00000065127.7	100	0.071	40.1
on.mrna.LG1.358.6	m.5100	ENSDART00000065127.7	100	0.079	40.1
on.mrna.LG1.358.7	m.5099	ENSDART00000065127.7	100	0.075	40.1
on.mrna.LG1.359.1	m.2510	ENSDART00000172772.1	88.57	0.22	38.2
on.mrna.LG1.36.1	m.3033	ENSDART00000173596.1	88.24	4e-06	54
on.mrna.LG1.36.2	m.3034	ENSDART00000173596.1	88.24	4e-06	54
on.mrna.LG1.36.3	m.3035	ENSDART00000173596.1	88.24	4e-06	54
on.mrna.LG1.360.1	m.5430	ENSDART00000091470.6	80.77	1e-92	343
on.mrna.LG1.361.1	m.2202	ENSDART00000023653.8	86.25	9e-12	71.9
on.mrna.LG1.362.1	m.4008	ENSDART00000053521.6	85.34	3e-37	157
on.mrna.LG1.362.2	m.4011	ENSDART00000053521.6	85.34	4e-37	157
on.mrna.LG1.362.3	m.4009	ENSDART00000053521.6	85.34	5e-37	157
on.mrna.LG1.362.4	m.4010	ENSDART00000053521.6	85.34	5e-37	157
on.mrna.LG1.362.5	m.4012	ENSDART00000053521.6	85.34	5e-37	157
on.mrna.LG1.363.1	m.2609	ENSDART00000041577.7	80.86	6e-48	194
on.mrna.LG1.363.2	m.2600	ENSDART00000041577.7	80.86	6e-48	194
on.mrna.LG1.363.3	m.2606	ENSDART00000041577.7	80.86	6e-48	194
on.mrna.LG1.363.4	m.2603	ENSDART00000041577.7	80.86	6e-48	194
on.mrna.LG1.364.1	m.1984	ENSDART00000166511.1	96.15	0.005	44.1
on.mrna.LG1.365.1	m.2485	ENSDART00000111948.3	100	0.81	36.2
on.mrna.LG1.366.1	m.3154	ENSDART00000110004.3	95.45	0.53	36.2
on.mrna.LG1.367.1	m.2295	ENSDART00000163471.1	89.29	2e-09	63.9
on.mrna.LG1.368.1	m.2909	ENSDART00000039495.4	80.18	6e-18	91.7
on.mrna.LG1.369.1	m.3511	ENSDART00000159316.1	85.9	3e-10	67.9
on.mrna.LG1.3690001.1	m.2815	ENSDART00000023539.7	81.19	8e-40	165
on.mrna.LG1.37.1	m.3899	ENSDART00000111301.4	83.41	3e-31	137
on.mrna.LG1.37.2	m.3897	ENSDART00000111301.4	83.83	2e-25	117
on.mrna.LG1.37.3	m.3901	ENSDART00000111301.4	83.83	2e-25	117
on.mrna.LG1.370.1	m.1710	ENSDART00000138403.3	81.97	5e-10	67.9
on.mrna.LG1.370.2	m.1711	ENSDART00000138403.3	81.97	5e-10	67.9
on.mrna.LG1.3700001.1	m.385	ENSDART00000003210.7	85.14	3e-08	60
on.mrna.LG1.371.1	m.1966	ENSDART00000170285.1	79.17	4e-62	240
on.mrna.LG1.371.10	m.1963	ENSDART00000170285.1	80.12	2e-51	204
on.mrna.LG1.371.11	m.1968	ENSDART00000170285.1	80.28	1e-17	91.7
on.mrna.LG1.371.2	m.1964	ENSDART00000170285.1	79.17	3e-62	240
on.mrna.LG1.371.3	m.1965	ENSDART00000170285.1	79.17	4e-62	240
on.mrna.LG1.371.4	m.1967	ENSDART00000170285.1	79.17	3e-62	240
on.mrna.LG1.371.5	m.1960	ENSDART00000170285.1	79.17	3e-62	240
on.mrna.LG1.371.6	m.1961	ENSDART00000170285.1	80.12	2e-51	204
on.mrna.LG1.371.7	m.1962	ENSDART00000170285.1	80.28	1e-17	91.7
on.mrna.LG1.371.8	m.1959	ENSDART00000170285.1	79.17	3e-62	240
on.mrna.LG1.371.9	m.1969	ENSDART00000170285.1	80.28	1e-17	91.7
on.mrna.LG1.372.1	m.2757	ENSDART00000089834.6	90.2	4e-08	61.9
on.mrna.LG1.372.2	m.2765	ENSDART00000089834.6	90.2	3e-08	61.9
on.mrna.LG1.374.1	m.3758	ENSDART00000099326.3	81.97	4e-10	67.9
on.mrna.LG1.374.2	m.3760	ENSDART00000099326.3	81.97	4e-10	67.9
on.mrna.LG1.374.3	m.3762	ENSDART00000099326.3	81.97	3e-10	67.9
on.mrna.LG1.374.4	m.3764	ENSDART00000099326.3	81.97	3e-10	67.9
on.mrna.LG1.374.5	m.3756	ENSDART00000099326.3	81.97	2e-10	67.9
on.mrna.LG1.375.1	m.4120	ENSDART00000012374.8	80.62	2e-66	254
on.mrna.LG1.376.1	m.3640	ENSDART00000078894.4	81.32	4e-31	137
on.mrna.LG1.376.2	m.3641	ENSDART00000078894.4	81.32	4e-31	137
on.mrna.LG1.377.1	m.5741	ENSDART00000078888.4	80.1	4e-40	167
on.mrna.LG1.377.2	m.5742	ENSDART00000078888.4	80.1	4e-40	167
on.mrna.LG1.378.1	m.5009	ENSDART00000028033.5	91.18	0.002	44.1
on.mrna.LG1.379.1	m.1370	ENSDART00000033746.6	81.88	8e-15	81.8
on.mrna.LG1.38.1	m.271	ENSDART00000052113.5	85.94	4e-07	58
on.mrna.LG1.380.1	m.3743	ENSDART00000165450.1	81.12	2e-23	113
on.mrna.LG1.380.2	m.3738	ENSDART00000165450.1	81.12	2e-23	113
on.mrna.LG1.380.3	m.3728	ENSDART00000165450.1	81.12	2e-23	113
on.mrna.LG1.380.4	m.3748	ENSDART00000165450.1	81.12	2e-23	113
on.mrna.LG1.380.5	m.3733	ENSDART00000165450.1	81.12	2e-23	113
on.mrna.LG1.380.6	m.3723	ENSDART00000140908.2	81.82	8e-13	77.8
on.mrna.LG1.3800002.1	m.4322	ENSDART00000012758.6	96.3	0.0008	46.1
on.mrna.LG1.3800003.1	m.6066	ENSDART00000018640.10	100	1.1	34.2
on.mrna.LG1.382.1	m.4772	ENSDART00000099285.3	87.04	1e-20	103
on.mrna.LG1.382.2	m.4771	ENSDART00000099285.3	82.5	3e-11	71.9
on.mrna.LG1.3820001.1	m.307	ENSDART00000064080.5	93.75	0.0002	48.1
on.mrna.LG1.383.1	m.4756	ENSDART00000005847.8	100	0.34	38.2
on.mrna.LG1.383.2	m.4752	ENSDART00000005847.8	100	0.34	38.2
on.mrna.LG1.383.3	m.4758	ENSDART00000005847.8	100	0.27	38.2
on.mrna.LG1.383.4	m.4754	ENSDART00000005847.8	100	0.22	38.2
on.mrna.LG1.383.5	m.4750	ENSDART00000005847.8	100	0.22	38.2
on.mrna.LG1.386.1	m.2194	ENSDART00000111861.3	88.52	6e-156	551
on.mrna.LG1.388.1	m.1306	ENSDART00000063832.5	100	1.1	34.2
on.mrna.LG1.389.1	m.5155	ENSDART00000089035.5	84.17	4e-20	101
on.mrna.LG1.389.10	m.5139	ENSDART00000089035.5	84.17	4e-20	101
on.mrna.LG1.389.11	m.5147	ENSDART00000089035.5	84.17	3e-20	101
on.mrna.LG1.389.2	m.5153	ENSDART00000089035.5	84.17	4e-20	101
on.mrna.LG1.389.3	m.5143	ENSDART00000089035.5	84.17	4e-20	101
on.mrna.LG1.389.4	m.5145	ENSDART00000089035.5	84.17	4e-20	101
on.mrna.LG1.389.5	m.5151	ENSDART00000089035.5	84.17	3e-20	101
on.mrna.LG1.389.6	m.5157	ENSDART00000089035.5	84.17	4e-20	101
on.mrna.LG1.389.7	m.5137	ENSDART00000089035.5	84.17	4e-20	101
on.mrna.LG1.389.8	m.5141	ENSDART00000089035.5	84.17	4e-20	101
on.mrna.LG1.389.9	m.5149	ENSDART00000089035.5	84.17	4e-20	101
on.mrna.LG1.39.1	m.2371	ENSDART00000083514.6	83.33	9e-17	89.7
on.mrna.LG1.39.2	m.2364	ENSDART00000083514.6	82.18	4e-32	141
on.mrna.LG1.39.3	m.2361	ENSDART00000083514.6	82.18	4e-32	141
on.mrna.LG1.39.4	m.2367	ENSDART00000083514.6	83.33	1e-16	89.7
on.mrna.LG1.390.1	m.54	ENSDART00000016983.9	81.67	4e-163	577
on.mrna.LG1.390.1	m.55	ENSDART00000016983.9	95.65	0.46	38.2
on.mrna.LG1.391.1	m.870	ENSDART00000090397.5	100	3.4	36.2
on.mrna.LG1.391.2	m.859	ENSDART00000090397.5	100	3.6	36.2
on.mrna.LG1.391.3	m.877	ENSDART00000090397.5	100	3.6	36.2
on.mrna.LG1.392.1	m.165	ENSDART00000142336.1	81.69	2e-146	521
on.mrna.LG1.392.2	m.158	ENSDART00000142336.1	81.69	2e-146	521
on.mrna.LG1.393.1	m.5875	ENSDART00000025423.8	82.8	0	1130
on.mrna.LG1.393.2	m.5879	ENSDART00000025423.8	82.69	0	1138
on.mrna.LG1.393.3	m.5880	ENSDART00000025423.8	81.54	0	842
on.mrna.LG1.393.4	m.5873	ENSDART00000025423.8	81.95	0	827
on.mrna.LG1.393.5	m.5881	ENSDART00000025423.8	81.54	0	842
on.mrna.LG1.393.6	m.5877	ENSDART00000025423.8	81.64	0	835
on.mrna.LG1.393.7	m.5874	ENSDART00000025423.8	84.84	0	1051
on.mrna.LG1.393.8	m.5876	ENSDART00000025423.8	83.62	0	755
on.mrna.LG1.393.9	m.5878	ENSDART00000025423.8	82.69	0	1138
on.mrna.LG1.394.1	m.5806	ENSDART00000077341.4	95.74	4e-13	77.8
on.mrna.LG1.395.1	m.2859	ENSDART00000109948.3	93.06	2e-20	103
on.mrna.LG1.396.1	m.2222	ENSDART00000010256.5	83.24	0	702
on.mrna.LG1.398.1	m.670	ENSDART00000102363.4	81.26	4e-123	442
on.mrna.LG1.398.2	m.672	ENSDART00000102363.4	81.04	4e-101	369
on.mrna.LG1.399.1	m.5757	ENSDART00000014572.7	90.43	3e-32	141
on.mrna.LG1.399.2	m.5745	ENSDART00000014572.7	90.43	3e-32	141
on.mrna.LG1.399.3	m.5760	ENSDART00000014572.7	90.43	3e-32	141
on.mrna.LG1.399.4	m.5751	ENSDART00000145946.3	79.07	4e-18	93.7
on.mrna.LG1.399.5	m.5754	ENSDART00000014572.7	90.43	3e-32	141
on.mrna.LG1.399.6	m.5748	ENSDART00000145946.3	79.07	4e-18	93.7
on.mrna.LG1.399.7	m.5763	ENSDART00000145946.3	79.07	4e-18	93.7
on.mrna.LG1.4.1	m.5832	ENSDART00000052389.4	79.29	5e-70	268
on.mrna.LG1.40.1	m.4175	ENSDART00000157917.1	78.3	3e-59	232
on.mrna.LG1.400.1	m.1021	ENSDART00000002498.8	78.5	1e-15	85.7
on.mrna.LG1.4000001.1	m.1089	ENSDART00000114062.3	79.15	4e-32	139
on.mrna.LG1.402.1	m.4827	ENSDART00000044705.6	86.54	2e-18	95.6
on.mrna.LG1.403.1	m.2728	ENSDART00000021949.10	100	0.62	36.2
on.mrna.LG1.403.2	m.2729	ENSDART00000021949.10	100	0.62	36.2
on.mrna.LG1.404.1	m.4311	ENSDART00000126475.2	82.14	4e-18	95.6
on.mrna.LG1.405.1	m.947	ENSDART00000105503.3	100	3.3	36.2
on.mrna.LG1.405.2	m.956	ENSDART00000105503.3	100	3.4	36.2
on.mrna.LG1.408.1	m.1289	ENSDART00000111774.2	78.1	4e-46	188
on.mrna.LG1.408.2	m.1286	ENSDART00000111774.2	78.1	4e-46	188
on.mrna.LG1.4080001.1	m.2999	ENSDART00000137572.2	81.37	1e-30	133
on.mrna.LG1.4080001.2	m.3000	ENSDART00000137572.2	82.5	1e-40	167
on.mrna.LG1.409.1	m.3351	ENSDART00000078140.4	80.11	8e-106	385
on.mrna.LG1.409.2	m.3352	ENSDART00000078140.4	80.11	8e-106	385
on.mrna.LG1.41.1	m.5039	ENSDART00000038273.5	91.53	4e-13	77.8
on.mrna.LG1.41.2	m.5041	ENSDART00000038273.5	91.53	4e-13	77.8
on.mrna.LG1.41.3	m.5037	ENSDART00000038273.5	91.53	4e-13	77.8
on.mrna.LG1.410.1	m.2374	ENSDART00000089242.4	83.03	2e-21	105
on.mrna.LG1.411.1	m.1010	ENSDART00000109753.4	100	0.087	38.2
on.mrna.LG1.413.1	m.6053	ENSDART00000057638.3	79.66	1e-116	422
on.mrna.LG1.413.2	m.6057	ENSDART00000057638.3	79.66	1e-116	422
on.mrna.LG1.414.1	m.5193	ENSDART00000142129.2	87.23	0.0007	46.1
on.mrna.LG1.415.1	m.4464	ENSDART00000057641.5	83.12	5e-05	50.1
on.mrna.LG1.417.1	m.366	ENSDART00000109798.3	88.61	3e-15	85.7
on.mrna.LG1.417.2	m.378	ENSDART00000109798.3	88.61	4e-15	85.7
on.mrna.LG1.417.3	m.372	ENSDART00000109798.3	88.61	4e-15	85.7
on.mrna.LG1.418.1	m.2804	ENSDART00000142738.1	83.01	1e-14	81.8
on.mrna.LG1.418.2	m.2808	ENSDART00000142738.1	83.01	1e-14	81.8
on.mrna.LG1.418.3	m.2810	ENSDART00000056512.5	92.11	1e-05	52
on.mrna.LG1.418.4	m.2806	ENSDART00000056512.5	92.11	9e-06	52
on.mrna.LG1.419.1	m.2158	ENSDART00000057651.5	84.13	2e-94	347
on.mrna.LG1.419.10	m.2165	ENSDART00000057651.5	94.35	4e-72	272
on.mrna.LG1.419.11	m.2157	ENSDART00000057651.5	82.08	3e-08	60
on.mrna.LG1.419.12	m.2169	ENSDART00000057651.5	82.4	2e-12	73.8
on.mrna.LG1.419.13	m.2160	ENSDART00000057651.5	83.93	0.022	40.1
on.mrna.LG1.419.2	m.2163	ENSDART00000057651.5	84.13	2e-94	347
on.mrna.LG1.419.3	m.2166	ENSDART00000057651.5	84.13	2e-94	347
on.mrna.LG1.419.4	m.2170	ENSDART00000057651.5	84.13	2e-94	347
on.mrna.LG1.419.5	m.2156	ENSDART00000057651.5	84.13	2e-94	347
on.mrna.LG1.419.6	m.2164	ENSDART00000057651.5	94.35	4e-72	272
on.mrna.LG1.419.7	m.2168	ENSDART00000057651.5	94.35	4e-72	272
on.mrna.LG1.419.8	m.2161	ENSDART00000057651.5	94.35	7e-72	272
on.mrna.LG1.419.9	m.2154	ENSDART00000057651.5	94.35	5e-72	272
on.mrna.LG1.42.1	m.5674	ENSDART00000065864.6	77.25	8e-56	220
on.mrna.LG1.42.2	m.5669	ENSDART00000065864.6	80.78	3e-74	281
on.mrna.LG1.42.3	m.5679	ENSDART00000065864.6	80.71	4e-89	331
on.mrna.LG1.420.1	m.1122	ENSDART00000089133.5	79.74	5e-75	283
on.mrna.LG1.420.2	m.1121	ENSDART00000089133.5	79.74	4e-75	283
on.mrna.LG1.421.1	m.4726	ENSDART00000066929.6	92.59	0.15	38.2
on.mrna.LG1.422.1	m.3874	ENSDART00000171605.1	100	0.11	40.1
on.mrna.LG1.422.2	m.3869	ENSDART00000171605.1	100	0.12	40.1
on.mrna.LG1.422.3	m.3871	ENSDART00000171605.1	100	0.12	40.1
on.mrna.LG1.423.1	m.3512	ENSDART00000006180.9	84.32	4e-42	174
on.mrna.LG1.424.1	m.2799	ENSDART00000029668.8	100	0.15	38.2
on.mrna.LG1.4240001.1	m.6009	ENSDART00000109665.2	80.2	6e-40	167
on.mrna.LG1.425.1	m.2403	ENSDART00000026476.4	85.8	1e-33	145
on.mrna.LG1.426.1	m.1793	ENSDART00000113498.3	96	0.016	42.1
on.mrna.LG1.426.2	m.1791	ENSDART00000113498.3	96	0.015	42.1
on.mrna.LG1.426.3	m.1792	ENSDART00000113498.3	96	0.011	42.1
on.mrna.LG1.427.1	m.5722	ENSDART00000016211.5	82.5	4e-83	309
on.mrna.LG1.427.2	m.5712	ENSDART00000016211.5	82.5	4e-83	309
on.mrna.LG1.427.3	m.5715	ENSDART00000016211.5	82.5	4e-83	309
on.mrna.LG1.427.4	m.5720	ENSDART00000016211.5	82.31	2e-58	226
on.mrna.LG1.427.5	m.5718	ENSDART00000016211.5	82.31	2e-58	226
on.mrna.LG1.428.1	m.1534	ENSDART00000171691.1	81.5	0	658
on.mrna.LG1.429.1	m.2342	ENSDART00000007231.5	82.08	5e-94	345
on.mrna.LG1.43.1	m.2109	ENSDART00000098842.4	83.09	3e-16	87.7
on.mrna.LG1.431.1	m.2359	ENSDART00000102563.4	78.59	5e-18	93.7
on.mrna.LG1.432.1	m.2968	ENSDART00000004420.8	83.56	2e-108	392
on.mrna.LG1.432.2	m.2964	ENSDART00000004420.8	83.56	2e-108	392
on.mrna.LG1.432.3	m.2966	ENSDART00000004420.8	84.1	2e-99	363
on.mrna.LG1.432.4	m.2963	ENSDART00000004420.8	83.56	2e-108	392
on.mrna.LG1.432.5	m.2965	ENSDART00000004420.8	84.01	2e-80	299
on.mrna.LG1.433.1	m.5802	ENSDART00000058628.4	87.23	0.0008	46.1
on.mrna.LG1.433.2	m.5804	ENSDART00000058628.4	87.23	0.0008	46.1
on.mrna.LG1.434.1	m.3458	ENSDART00000158825.1	91.89	0	1518
on.mrna.LG1.434.1	m.3459	ENSDART00000158825.1	91.89	0	1518
on.mrna.LG1.434.2	m.3460	ENSDART00000158825.1	91.89	0	1518
on.mrna.LG1.434.2	m.3461	ENSDART00000158825.1	91.89	0	1518
on.mrna.LG1.434.3	m.3456	ENSDART00000158825.1	92.89	0	1417
on.mrna.LG1.434.3	m.3457	ENSDART00000158825.1	92.89	0	1417
on.mrna.LG1.434.4	m.3462	ENSDART00000158825.1	91.89	0	1518
on.mrna.LG1.434.4	m.3463	ENSDART00000158825.1	91.89	0	1518
on.mrna.LG1.434.5	m.3464	ENSDART00000158825.1	91.89	0	1518
on.mrna.LG1.434.5	m.3465	ENSDART00000158825.1	91.89	0	1518
on.mrna.LG1.435.1	m.3360	ENSDART00000088005.4	79.08	2e-17	91.7
on.mrna.LG1.435.2	m.3359	ENSDART00000088005.4	83.21	8e-16	85.7
on.mrna.LG1.436.1	m.3809	ENSDART00000088005.4	85.71	1e-09	65.9
on.mrna.LG1.437.1	m.2150	ENSDART00000111303.4	100	0.017	44.1
on.mrna.LG1.437.2	m.2151	ENSDART00000101168.4	83.52	8e-08	61.9
on.mrna.LG1.438.1	m.2840	ENSDART00000136217.1	80.82	0	684
on.mrna.LG1.439.1	m.269	ENSDART00000020082.7	100	1	34.2
on.mrna.LG1.44.1	m.3766	ENSDART00000021605.6	87.76	7e-06	54
on.mrna.LG1.44.2	m.3771	ENSDART00000021605.6	87.76	7e-06	54
on.mrna.LG1.440.1	m.3305	ENSDART00000077459.5	81.19	4e-22	107
on.mrna.LG1.440.2	m.3306	ENSDART00000077459.5	81.19	4e-22	107
on.mrna.LG1.440.3	m.3303	ENSDART00000077459.5	81.19	3e-22	107
on.mrna.LG1.441.1	m.909	ENSDART00000135517.2	87.1	3e-07	60
on.mrna.LG1.441.1	m.910	ENSDART00000110061.3	100	0.0002	50.1
on.mrna.LG1.442.1	m.1814	ENSDART00000046438.6	82.24	1e-16	89.7
on.mrna.LG1.442.1	m.1815	ENSDART00000046438.6	82.96	3e-16	87.7
on.mrna.LG1.443.1	m.4121	ENSDART00000109927.2	90	0.0002	48.1
on.mrna.LG1.444.1	m.5043	ENSDART00000113669.3	88.1	0.002	44.1
on.mrna.LG1.445.1	m.3130	ENSDART00000077418.5	81.89	3e-54	214
on.mrna.LG1.445.2	m.3127	ENSDART00000077418.5	81.89	3e-54	214
on.mrna.LG1.446.1	m.5128	ENSDART00000160840.1	95.65	0.25	38.2
on.mrna.LG1.446.2	m.5132	ENSDART00000130358.2	100	0.13	40.1
on.mrna.LG1.447.1	m.582	ENSDART00000087565.4	90.91	0.007	42.1
on.mrna.LG1.447.2	m.583	ENSDART00000097888.4	84.34	8e-09	61.9
on.mrna.LG1.448.1	m.1342	ENSDART00000087111.6	89.87	2e-17	93.7
on.mrna.LG1.448.10	m.1343	ENSDART00000062780.6	78.53	1e-20	103
on.mrna.LG1.448.2	m.1340	ENSDART00000087111.6	89.87	2e-17	93.7
on.mrna.LG1.448.3	m.1338	ENSDART00000087111.6	89.87	2e-17	93.7
on.mrna.LG1.448.4	m.1345	ENSDART00000087111.6	89.87	2e-17	93.7
on.mrna.LG1.448.5	m.1348	ENSDART00000087111.6	89.87	2e-17	93.7
on.mrna.LG1.448.6	m.1341	ENSDART00000087111.6	89.87	2e-17	93.7
on.mrna.LG1.448.7	m.1344	ENSDART00000062780.6	78.53	3e-20	103
on.mrna.LG1.448.8	m.1337	ENSDART00000062780.6	78.53	2e-20	103
on.mrna.LG1.448.9	m.1347	ENSDART00000062780.6	78.53	2e-20	103
on.mrna.LG1.449.1	m.2441	ENSDART00000073757.3	100	0.15	40.1
on.mrna.LG1.449.2	m.2443	ENSDART00000073757.3	100	0.13	40.1
on.mrna.LG1.45.1	m.6064	ENSDART00000007487.8	81.98	2e-72	274
on.mrna.LG1.45.2	m.6063	ENSDART00000007487.8	81.98	2e-72	274
on.mrna.LG1.45.3	m.6061	ENSDART00000007487.8	81.82	1e-63	244
on.mrna.LG1.45.4	m.6062	ENSDART00000007487.8	81.84	6e-65	248
on.mrna.LG1.450.1	m.6051	ENSDART00000046802.6	78.04	6e-27	123
on.mrna.LG1.451.1	m.6067	ENSDART00000111365.4	96.15	0.014	44.1
on.mrna.LG1.452.1	m.3843	ENSDART00000105236.4	78.57	0.0006	48.1
on.mrna.LG1.453.1	m.2237	ENSDART00000013170.8	78.66	3e-07	56
on.mrna.LG1.454.1	m.2814	ENSDART00000142833.1	100	4e-06	52
on.mrna.LG1.455.1	m.2445	ENSDART00000013170.8	100	0.031	42.1
on.mrna.LG1.457.1	m.5908	ENSDART00000013170.8	81.25	2e-09	63.9
on.mrna.LG1.458.1	m.4224	ENSDART00000005927.7	100	0.075	38.2
on.mrna.LG1.459.1	m.4813	ENSDART00000013170.8	87.76	9e-05	50.1
on.mrna.LG1.46.1	m.4910	ENSDART00000164838.1	82.89	0.0005	48.1
on.mrna.LG1.460.1	m.2290	ENSDART00000115321.3	78.04	1e-32	145
on.mrna.LG1.461.1	m.3445	ENSDART00000090549.7	83.45	4e-19	97.6
on.mrna.LG1.461.2	m.3448	ENSDART00000121488.2	83.97	6e-18	93.7
on.mrna.LG1.461.3	m.3453	ENSDART00000121488.2	81.05	4e-23	111
on.mrna.LG1.461.4	m.3450	ENSDART00000121488.2	81.05	3e-23	111
on.mrna.LG1.462.1	m.4028	ENSDART00000173066.1	100	0.036	40.1
on.mrna.LG1.463.1	m.2484	ENSDART00000147845.2	79.35	4e-84	313
on.mrna.LG1.464.1	m.4766	ENSDART00000086164.5	81.31	1e-72	276
on.mrna.LG1.464.2	m.4761	ENSDART00000086164.5	81.31	1e-72	276
on.mrna.LG1.465.1	m.844	ENSDART00000009104.5	87.77	1e-58	232
on.mrna.LG1.465.2	m.839	ENSDART00000009104.5	87.77	1e-58	232
on.mrna.LG1.467.1	m.255	ENSDART00000076596.5	100	5e-08	60
on.mrna.LG1.467.2	m.261	ENSDART00000076596.5	100	6e-08	60
on.mrna.LG1.467.2	m.262	ENSDART00000076596.5	100	6e-08	60
on.mrna.LG1.467.3	m.251	ENSDART00000076596.5	100	6e-08	60
on.mrna.LG1.467.3	m.252	ENSDART00000076596.5	100	6e-08	60
on.mrna.LG1.467.4	m.265	ENSDART00000076596.5	100	6e-08	60
on.mrna.LG1.467.4	m.266	ENSDART00000076596.5	100	6e-08	60
on.mrna.LG1.467.5	m.257	ENSDART00000076596.5	100	6e-08	60
on.mrna.LG1.467.5	m.258	ENSDART00000076596.5	100	6e-08	60
on.mrna.LG1.469.1	m.2239	ENSDART00000057268.6	90.62	0.062	40.1
on.mrna.LG1.469.1	m.2240	ENSDART00000057268.6	90.62	0.062	40.1
on.mrna.LG1.469.1	m.2241	ENSDART00000057268.6	90.32	0.25	38.2
on.mrna.LG1.47.1	m.4948	ENSDART00000161914.1	85.19	0.003	44.1
on.mrna.LG1.47.2	m.4951	ENSDART00000161914.1	85.19	0.003	44.1
on.mrna.LG1.47.3	m.4953	ENSDART00000045675.6	100	0.52	36.2
on.mrna.LG1.47.3	m.4954	ENSDART00000114208.3	100	1.3	34.2
on.mrna.LG1.470.1	m.2969	ENSDART00000104249.2	88.06	4e-31	139
on.mrna.LG1.471.1	m.3998	ENSDART00000104257.3	86.4	1e-63	246
on.mrna.LG1.471.2	m.3997	ENSDART00000104257.3	86.4	6e-64	246
on.mrna.LG1.471.3	m.4000	ENSDART00000104257.3	86.4	1e-63	246
on.mrna.LG1.471.4	m.4002	ENSDART00000104257.3	86.4	1e-63	246
on.mrna.LG1.4710001.1	m.1292	ENSDART00000006443.6	100	0.13	40.1
on.mrna.LG1.4710001.2	m.1294	ENSDART00000006443.6	100	0.13	40.1
on.mrna.LG1.472.1	m.1976	ENSDART00000016386.6	100	1.1	34.2
on.mrna.LG1.473.1	m.5570	ENSDART00000101861.5	100	2.7	34.2
on.mrna.LG1.475.1	m.3425	ENSDART00000109298.3	100	0.22	38.2
on.mrna.LG1.476.1	m.5023	ENSDART00000075646.3	87.23	0.0007	46.1
on.mrna.LG1.477.1	m.2288	ENSDART00000082087.5	79.45	6e-25	115
on.mrna.LG1.477.2	m.2287	ENSDART00000082087.5	79.45	6e-25	115
on.mrna.LG1.478.1	m.3388	ENSDART00000020233.8	80.63	1e-74	283
on.mrna.LG1.479.1	m.3074	ENSDART00000128722.1	84.34	1e-08	61.9
on.mrna.LG1.4790001.1	m.2906	ENSDART00000140798.2	100	2.1	34.2
on.mrna.LG1.48.1	m.1351	ENSDART00000125733.3	83.16	2e-08	61.9
on.mrna.LG1.480.1	m.1060	ENSDART00000109495.3	86.3	1e-09	65.9
on.mrna.LG1.482.1	m.5079	ENSDART00000074761.2	84.72	3e-40	167
on.mrna.LG1.482.2	m.5077	ENSDART00000074761.2	87.37	3e-18	93.7
on.mrna.LG1.4820001.1	m.442	ENSDART00000051233.4	100	0.26	36.2
on.mrna.LG1.483.1	m.3380	ENSDART00000110092.3	91.43	0.004	46.1
on.mrna.LG1.483.1	m.3381	ENSDART00000022179.8	100	6.4	34.2
on.mrna.LG1.483.1	m.3383	ENSDART00000053418.5	95.24	5.5	34.2
on.mrna.LG1.485.1	m.2912	ENSDART00000039165.6	80.09	9e-71	268
on.mrna.LG1.4860001.1	m.2138	ENSDART00000058351.6	80.6	2e-08	60
on.mrna.LG1.487.1	m.1788	ENSDART00000012944.5	82.09	6e-74	280
on.mrna.LG1.487.2	m.1785	ENSDART00000012944.5	82.09	6e-74	280
on.mrna.LG1.488.1	m.204	ENSDART00000170659.1	78.24	2e-08	61.9
on.mrna.LG1.488.2	m.206	ENSDART00000170659.1	78.24	2e-08	61.9
on.mrna.LG1.4880001.1	m.2962	ENSDART00000102431.4	96.3	0.0004	46.1
on.mrna.LG1.489.1	m.5946	ENSDART00000009698.10	80.6	2e-83	311
on.mrna.LG1.489.2	m.5942	ENSDART00000009698.10	80.6	2e-83	311
on.mrna.LG1.489.3	m.5941	ENSDART00000009698.10	80.6	2e-83	311
on.mrna.LG1.489.4	m.5945	ENSDART00000009698.10	80.6	2e-83	311
on.mrna.LG1.489.5	m.5939	ENSDART00000009698.10	80.6	2e-83	311
on.mrna.LG1.489.6	m.5944	ENSDART00000009698.10	80.6	2e-83	311
on.mrna.LG1.489.7	m.5940	ENSDART00000009698.10	80.6	2e-83	311
on.mrna.LG1.489.8	m.5943	ENSDART00000009698.10	80.6	2e-83	311
on.mrna.LG1.490.1	m.1349	ENSDART00000073397.6	80.93	3e-108	394
on.mrna.LG1.491.1	m.5925	ENSDART00000085087.5	81.82	1e-07	60
on.mrna.LG1.4910001.1	m.2658	ENSDART00000040627.5	100	0.021	40.1
on.mrna.LG1.492.1	m.3795	ENSDART00000136555.3	78.61	0	686
on.mrna.LG1.492.2	m.3802	ENSDART00000136555.3	78.61	0	686
on.mrna.LG1.493.1	m.4387	ENSDART00000173453.1	89.54	0	981
on.mrna.LG1.493.2	m.4385	ENSDART00000173453.1	89.53	0	880
on.mrna.LG1.493.3	m.4389	ENSDART00000173453.1	89.53	0	880
on.mrna.LG1.493.4	m.4379	ENSDART00000173453.1	89.53	0	880
on.mrna.LG1.493.5	m.4383	ENSDART00000173453.1	89.53	0	704
on.mrna.LG1.493.6	m.4381	ENSDART00000173453.1	89.33	9e-173	607
on.mrna.LG1.494.1	m.2044	ENSDART00000075538.5	89.47	0.004	44.1
on.mrna.LG1.495.1	m.1951	ENSDART00000162784.1	92.11	2e-05	52
on.mrna.LG1.496.1	m.5619	ENSDART00000012862.8	79.54	2e-38	161
on.mrna.LG1.496.2	m.5613	ENSDART00000012862.8	79.54	2e-38	161
on.mrna.LG1.496.3	m.5616	ENSDART00000012862.8	79.54	2e-38	161
on.mrna.LG1.496.4	m.5622	ENSDART00000012862.8	89.71	9e-38	159
on.mrna.LG1.497.1	m.6124	ENSDART00000086190.5	78.86	3e-19	97.6
on.mrna.LG1.498.1	m.5127	ENSDART00000050230.5	79.96	2e-50	200
on.mrna.LG1.499.1	m.1028	ENSDART00000008013.5	83.87	6e-102	371
on.mrna.LG1.50.1	m.155	ENSDART00000131780.2	100	0.009	44.1
on.mrna.LG1.500.1	m.612	ENSDART00000110843.3	85.71	1e-21	107
on.mrna.LG1.500.10	m.619	ENSDART00000110843.3	85.71	1e-21	107
on.mrna.LG1.500.11	m.625	ENSDART00000110843.3	85.71	1e-21	107
on.mrna.LG1.500.2	m.596	ENSDART00000110843.3	85.71	1e-21	107
on.mrna.LG1.500.3	m.603	ENSDART00000110843.3	85.71	1e-21	107
on.mrna.LG1.500.4	m.622	ENSDART00000110843.3	85.71	1e-21	107
on.mrna.LG1.500.5	m.615	ENSDART00000110843.3	85.71	1e-21	107
on.mrna.LG1.500.6	m.609	ENSDART00000110843.3	85.71	1e-21	107
on.mrna.LG1.500.7	m.600	ENSDART00000110843.3	85.71	1e-21	107
on.mrna.LG1.500.8	m.593	ENSDART00000110843.3	85.71	1e-21	107
on.mrna.LG1.500.9	m.606	ENSDART00000110843.3	85.71	1e-21	107
on.mrna.LG1.5000001.1	m.2193	ENSDART00000173020.1	100	0.089	38.2
on.mrna.LG1.5000002.1	m.3059	ENSDART00000023831.5	78.11	9e-45	182
on.mrna.LG1.501.1	m.1841	ENSDART00000110409.4	91.53	4e-13	77.8
on.mrna.LG1.502.1	m.631	ENSDART00000075588.5	89.47	0.004	44.1
on.mrna.LG1.503.2	m.2274	ENSDART00000060245.3	84.62	0.0003	50.1
on.mrna.LG1.504.1	m.4364	ENSDART00000002075.9	85.04	2e-20	101
on.mrna.LG1.504.2	m.4362	ENSDART00000058667.6	88.64	0.0002	48.1
on.mrna.LG1.505.1	m.644	ENSDART00000046689.6	87.84	6e-13	75.8
on.mrna.LG1.506.1	m.310	ENSDART00000004692.8	82.65	5e-114	412
on.mrna.LG1.507.1	m.5278	ENSDART00000002892.4	83.83	2e-95	351
on.mrna.LG1.507.2	m.5274	ENSDART00000002892.4	83.83	2e-95	351
on.mrna.LG1.507.3	m.5276	ENSDART00000002892.4	83.83	2e-95	351
on.mrna.LG1.507.4	m.5272	ENSDART00000002892.4	83.83	2e-95	351
on.mrna.LG1.507.5	m.5280	ENSDART00000002892.4	83.83	2e-95	351
on.mrna.LG1.508.1	m.1029	ENSDART00000163369.1	79.15	1e-54	216
on.mrna.LG1.508.2	m.1033	ENSDART00000163369.1	79.15	1e-54	216
on.mrna.LG1.508.3	m.1031	ENSDART00000163369.1	79.18	1e-50	202
on.mrna.LG1.508.4	m.1035	ENSDART00000042074.7	80.38	2e-43	178
on.mrna.LG1.51.1	m.939	ENSDART00000123887.2	88.64	0.0005	48.1
on.mrna.LG1.51.2	m.943	ENSDART00000123887.2	88.64	0.0005	48.1
on.mrna.LG1.51.3	m.935	ENSDART00000123887.2	88.64	0.0005	48.1
on.mrna.LG1.510.1	m.2172	ENSDART00000099511.3	81.85	2e-34	149
on.mrna.LG1.510.2	m.2176	ENSDART00000099511.3	81.85	1e-34	149
on.mrna.LG1.512.1	m.3333	ENSDART00000055567.4	81.63	7e-35	149
on.mrna.LG1.513.1	m.1829	ENSDART00000003913.9	100	1.4	36.2
on.mrna.LG1.513.10	m.1831	ENSDART00000003913.9	100	1.2	36.2
on.mrna.LG1.513.11	m.1837	ENSDART00000003913.9	100	1.2	36.2
on.mrna.LG1.513.2	m.1835	ENSDART00000003913.9	100	1.4	36.2
on.mrna.LG1.513.3	m.1821	ENSDART00000003913.9	100	1.3	36.2
on.mrna.LG1.513.4	m.1839	ENSDART00000003913.9	100	1.3	36.2
on.mrna.LG1.513.5	m.1825	ENSDART00000003913.9	100	1.4	36.2
on.mrna.LG1.513.6	m.1823	ENSDART00000003913.9	100	1.4	36.2
on.mrna.LG1.513.7	m.1827	ENSDART00000003913.9	100	1.4	36.2
on.mrna.LG1.513.8	m.1833	ENSDART00000003913.9	100	1.4	36.2
on.mrna.LG1.513.9	m.1819	ENSDART00000003913.9	100	1.3	36.2
on.mrna.LG1.514.1	m.4652	ENSDART00000148490.2	83.71	2e-26	123
on.mrna.LG1.514.10	m.4656	ENSDART00000148490.2	83.77	7e-175	617
on.mrna.LG1.514.11	m.4666	ENSDART00000148490.2	83.83	4e-173	611
on.mrna.LG1.514.12	m.4678	ENSDART00000148490.2	83.77	7e-175	617
on.mrna.LG1.514.2	m.4680	ENSDART00000148490.2	83.71	2e-26	123
on.mrna.LG1.514.3	m.4676	ENSDART00000148490.2	83.77	7e-175	617
on.mrna.LG1.514.4	m.4682	ENSDART00000148490.2	83.77	8e-175	617
on.mrna.LG1.514.5	m.4654	ENSDART00000148490.2	83.83	4e-173	611
on.mrna.LG1.514.6	m.4658	ENSDART00000148490.2	83.83	5e-173	611
on.mrna.LG1.514.7	m.4672	ENSDART00000148490.2	83.77	7e-175	617
on.mrna.LG1.514.8	m.4668	ENSDART00000148490.2	83.83	5e-173	611
on.mrna.LG1.514.9	m.4661	ENSDART00000148490.2	83.83	5e-173	611
on.mrna.LG1.515.1	m.2717	ENSDART00000122377.2	84.62	0.031	40.1
on.mrna.LG1.515.2	m.2714	ENSDART00000122377.2	84.62	0.031	40.1
on.mrna.LG1.515.3	m.2716	ENSDART00000122377.2	84.62	0.038	40.1
on.mrna.LG1.516.1	m.80	ENSDART00000077724.5	83.76	4e-80	299
on.mrna.LG1.516.2	m.81	ENSDART00000077724.5	83.78	5e-70	266
on.mrna.LG1.516.3	m.77	ENSDART00000077724.5	83.76	4e-80	299
on.mrna.LG1.516.4	m.79	ENSDART00000077724.5	83.76	4e-80	299
on.mrna.LG1.516.5	m.76	ENSDART00000077724.5	83.76	4e-80	299
on.mrna.LG1.517.1	m.4408	ENSDART00000088037.5	82.85	0	731
on.mrna.LG1.517.2	m.4415	ENSDART00000088037.5	82.85	0	731
on.mrna.LG1.517.3	m.4422	ENSDART00000088037.5	82.85	0	731
on.mrna.LG1.517.4	m.4429	ENSDART00000088037.5	82.85	0	731
on.mrna.LG1.518.1	m.3307	ENSDART00000041597.2	83.2	1e-34	147
on.mrna.LG1.519.1	m.3032	ENSDART00000059208.4	88.8	1e-31	137
on.mrna.LG1.519.2	m.3030	ENSDART00000059208.4	88.8	1e-31	137
on.mrna.LG1.519.3	m.3031	ENSDART00000059208.4	88.8	1e-31	137
on.mrna.LG1.519.4	m.3029	ENSDART00000059208.4	85	9e-29	127
on.mrna.LG1.520.1	m.4573	ENSDART00000059208.4	89.36	2e-06	54
on.mrna.LG1.522.1	m.2033	ENSDART00000140710.2	82.91	2e-11	73.8
on.mrna.LG1.522.2	m.2009	ENSDART00000157535.1	90.32	8e-46	188
on.mrna.LG1.522.3	m.2021	ENSDART00000157535.1	90.32	8e-46	188
on.mrna.LG1.523.1	m.5447	ENSDART00000148564.2	100	1.1	34.2
on.mrna.LG1.524.1	m.571	ENSDART00000113467.4	84.09	1e-08	63.9
on.mrna.LG1.525.1	m.3940	ENSDART00000058941.5	100	0.58	36.2
on.mrna.LG1.526.1	m.5416	ENSDART00000006078.9	82.71	3e-97	357
on.mrna.LG1.527.1	m.2779	ENSDART00000014582.8	81.76	2e-17	91.7
on.mrna.LG1.527.2	m.2781	ENSDART00000014582.8	81.76	2e-17	91.7
on.mrna.LG1.528.1	m.2527	ENSDART00000033591.7	82.56	1e-05	52
on.mrna.LG1.528.2	m.2529	ENSDART00000033591.7	82.56	1e-05	52
on.mrna.LG1.528.3	m.2533	ENSDART00000033591.7	82.56	1e-05	52
on.mrna.LG1.528.4	m.2531	ENSDART00000033591.7	82.56	1e-05	52
on.mrna.LG1.529.1	m.1773	ENSDART00000098390.4	87.72	3e-07	58
on.mrna.LG1.529.2	m.1777	ENSDART00000098390.4	87.72	3e-07	58
on.mrna.LG1.529.3	m.1775	ENSDART00000098390.4	87.72	3e-07	58
on.mrna.LG1.531.1	m.2459	ENSDART00000166044.1	96	0.005	42.1
on.mrna.LG1.532.1	m.3310	ENSDART00000170663.2	87.39	4e-25	117
on.mrna.LG1.532.2	m.3319	ENSDART00000170663.2	87.39	3e-25	117
on.mrna.LG1.532.3	m.3312	ENSDART00000170663.2	83.33	6e-52	206
on.mrna.LG1.532.4	m.3316	ENSDART00000170663.2	83.33	5e-52	206
on.mrna.LG1.532.5	m.3314	ENSDART00000170663.2	83.33	6e-52	206
on.mrna.LG1.533.1	m.4032	ENSDART00000159481.2	81.6	1e-163	577
on.mrna.LG1.533.2	m.4031	ENSDART00000159481.2	81.44	1e-154	547
on.mrna.LG1.534.1	m.2231	ENSDART00000041625.6	81.74	1e-26	123
on.mrna.LG1.536.1	m.4092	ENSDART00000021372.5	85.09	1e-28	129
on.mrna.LG1.536.2	m.4087	ENSDART00000021372.5	81.13	6e-21	103
on.mrna.LG1.536.3	m.4097	ENSDART00000021372.5	85.09	9e-29	129
on.mrna.LG1.5360001.1	m.2864	ENSDART00000110774.2	86.15	3e-07	58
on.mrna.LG1.5360002.1	m.3262	ENSDART00000110774.2	86.15	4e-07	58
on.mrna.LG1.537.1	m.3654	ENSDART00000110774.2	83.72	1e-16	89.7
on.mrna.LG1.537.2	m.3655	ENSDART00000110774.2	83.72	1e-16	89.7
on.mrna.LG1.5370001.1	m.5120	ENSDART00000122512.2	87.23	0.001	46.1
on.mrna.LG1.538.1	m.5838	ENSDART00000064403.6	83.7	4e-09	63.9
on.mrna.LG1.538.2	m.5842	ENSDART00000064403.6	80.35	5e-12	73.8
on.mrna.LG1.538.3	m.5840	ENSDART00000064403.6	80.35	5e-12	73.8
on.mrna.LG1.538.4	m.5836	ENSDART00000064403.6	80.35	3e-12	73.8
on.mrna.LG1.538.5	m.5834	ENSDART00000064403.6	80.35	3e-12	73.8
on.mrna.LG1.5380001.1	m.6109	ENSDART00000137904.2	100	8.9	32.2
on.mrna.LG1.5380001.2	m.6104	ENSDART00000137904.2	100	6.9	32.2
on.mrna.LG1.5380001.3	m.6107	ENSDART00000137904.2	100	6.4	32.2
on.mrna.LG1.54.1	m.5537	ENSDART00000099988.4	82.09	2e-46	188
on.mrna.LG1.54.2	m.5539	ENSDART00000099988.4	82.09	2e-46	188
on.mrna.LG1.540.1	m.5736	ENSDART00000134144.1	92.31	2e-11	71.9
on.mrna.LG1.540.1	m.5737	ENSDART00000134144.1	92.31	2e-11	71.9
on.mrna.LG1.541.1	m.4955	ENSDART00000167229.1	82.53	0	670
on.mrna.LG1.541.10	m.4968	ENSDART00000170888.1	81.24	0	773
on.mrna.LG1.541.11	m.4959	ENSDART00000170888.1	81.24	0	773
on.mrna.LG1.541.12	m.4990	ENSDART00000170888.1	81.24	0	773
on.mrna.LG1.541.13	m.5006	ENSDART00000167229.1	80.73	0	710
on.mrna.LG1.541.2	m.5001	ENSDART00000170888.1	82.44	0	735
on.mrna.LG1.541.3	m.4985	ENSDART00000170888.1	82.44	0	735
on.mrna.LG1.541.4	m.4963	ENSDART00000170888.1	82.44	0	735
on.mrna.LG1.541.5	m.4980	ENSDART00000170888.1	82.44	0	735
on.mrna.LG1.541.6	m.4994	ENSDART00000167229.1	82.53	0	698
on.mrna.LG1.541.7	m.4997	ENSDART00000170888.1	82.44	0	735
on.mrna.LG1.541.8	m.4976	ENSDART00000167229.1	82.53	0	670
on.mrna.LG1.541.9	m.4972	ENSDART00000167229.1	82.53	0	670
on.mrna.LG1.546.1	m.4405	ENSDART00000079782.5	100	0.46	38.2
on.mrna.LG1.547.1	m.3753	ENSDART00000005053.10	80.33	0	743
on.mrna.LG1.548.1	m.6038	ENSDART00000074963.3	83.05	7e-24	113
on.mrna.LG1.548.2	m.6032	ENSDART00000074963.3	83.05	6e-24	113
on.mrna.LG1.548.3	m.6028	ENSDART00000074963.3	83.05	6e-24	113
on.mrna.LG1.548.4	m.6035	ENSDART00000074963.3	83.05	6e-24	113
on.mrna.LG1.548.5	m.6025	ENSDART00000074963.3	83.05	6e-24	113
on.mrna.LG1.548.6	m.6022	ENSDART00000074963.3	83.05	7e-24	113
on.mrna.LG1.549.1	m.5218	ENSDART00000026712.7	80.33	3e-131	470
on.mrna.LG1.549.2	m.5222	ENSDART00000026712.7	80.33	3e-131	470
on.mrna.LG1.55.1	m.4872	ENSDART00000074587.6	88.24	7e-17	89.7
on.mrna.LG1.55.2	m.4870	ENSDART00000074587.6	88.24	7e-17	89.7
on.mrna.LG1.550.1	m.3830	ENSDART00000043857.4	91.3	1e-43	178
on.mrna.LG1.550.2	m.3822	ENSDART00000043857.4	91.3	1e-43	178
on.mrna.LG1.550.3	m.3834	ENSDART00000043857.4	91.3	1e-43	178
on.mrna.LG1.550.4	m.3826	ENSDART00000043857.4	91.3	1e-43	178
on.mrna.LG1.554.1	m.5114	ENSDART00000043857.4	84.71	9e-139	494
on.mrna.LG1.554.2	m.5113	ENSDART00000043857.4	84.53	1e-148	527
on.mrna.LG1.555.1	m.6073	ENSDART00000162850.2	84.51	7e-144	511
on.mrna.LG1.556.1	m.344	ENSDART00000130028.3	88.71	2e-30	135
on.mrna.LG1.556.2	m.348	ENSDART00000130028.3	88.71	2e-30	135
on.mrna.LG1.556.3	m.346	ENSDART00000130028.3	88.71	2e-30	135
on.mrna.LG1.557.1	m.1079	ENSDART00000029565.7	81.31	3e-77	289
on.mrna.LG1.557.2	m.1080	ENSDART00000029565.7	81.31	3e-77	289
on.mrna.LG1.557.3	m.1077	ENSDART00000029565.7	81.31	3e-77	289
on.mrna.LG1.557.4	m.1081	ENSDART00000029565.7	80.85	6e-53	208
on.mrna.LG1.557.5	m.1078	ENSDART00000029565.7	81.07	3e-39	163
on.mrna.LG1.558.1	m.4225	ENSDART00000027807.9	79.53	0	1142
on.mrna.LG1.559.1	m.2697	ENSDART00000047528.5	100	0.022	42.1
on.mrna.LG1.56.1	m.4118	ENSDART00000012241.9	80.97	7e-84	313
on.mrna.LG1.56.2	m.4114	ENSDART00000012241.9	80.97	7e-84	313
on.mrna.LG1.56.3	m.4117	ENSDART00000012241.9	80.79	1e-91	339
on.mrna.LG1.56.4	m.4119	ENSDART00000012241.9	80.79	1e-91	339
on.mrna.LG1.56.5	m.4115	ENSDART00000012241.9	80.79	1e-91	339
on.mrna.LG1.560.1	m.4483	ENSDART00000113342.4	80.95	1e-87	325
on.mrna.LG1.561.1	m.3341	ENSDART00000111842.4	82.19	2e-88	329
on.mrna.LG1.561.2	m.3345	ENSDART00000111842.4	83.55	1e-67	260
on.mrna.LG1.561.3	m.3337	ENSDART00000111842.4	82.19	2e-88	329
on.mrna.LG1.561.4	m.3348	ENSDART00000111842.4	83.55	1e-67	260
on.mrna.LG1.562.1	m.5905	ENSDART00000084249.5	80.19	5e-122	440
on.mrna.LG1.562.2	m.5895	ENSDART00000084249.5	80.19	4e-122	440
on.mrna.LG1.562.3	m.5901	ENSDART00000084249.5	80.19	4e-122	440
on.mrna.LG1.562.4	m.5897	ENSDART00000084249.5	80.19	4e-122	440
on.mrna.LG1.562.5	m.5890	ENSDART00000084249.5	80.19	3e-122	440
on.mrna.LG1.562.6	m.5892	ENSDART00000084249.5	80.19	3e-122	440
on.mrna.LG1.562.7	m.5899	ENSDART00000084249.5	80.19	3e-122	440
on.mrna.LG1.562.8	m.5903	ENSDART00000084249.5	80.19	3e-122	440
on.mrna.LG1.5620001.1	m.4177	ENSDART00000052380.5	86.27	0.003	46.1
on.mrna.LG1.5620001.2	m.4179	ENSDART00000052380.5	86.27	0.003	46.1
on.mrna.LG1.5620002.1	m.581	ENSDART00000067762.6	100	1.6	34.2
on.mrna.LG1.563.1	m.4826	ENSDART00000052379.6	79.15	2e-48	194
on.mrna.LG1.564.1	m.2598	ENSDART00000143300.2	80.66	2e-18	95.6
on.mrna.LG1.565.1	m.2230	ENSDART00000143300.2	80.82	1e-10	67.9
on.mrna.LG1.566.1	m.4567	ENSDART00000084266.5	82.15	3e-101	371
on.mrna.LG1.566.1	m.4568	ENSDART00000084266.5	81.67	6e-94	345
on.mrna.LG1.566.2	m.4570	ENSDART00000084266.5	82.15	3e-101	371
on.mrna.LG1.566.2	m.4571	ENSDART00000084266.5	81.67	6e-94	345
on.mrna.LG1.567.1	m.3810	ENSDART00000084282.6	79.32	5e-58	228
on.mrna.LG1.568.1	m.5684	ENSDART00000134177.1	91.89	5e-05	50.1
on.mrna.LG1.569.1	m.4361	ENSDART00000134177.1	92.5	8e-07	56
on.mrna.LG1.57.1	m.4641	ENSDART00000045679.8	83.42	0	733
on.mrna.LG1.57.2	m.4637	ENSDART00000045679.8	83.52	0	668
on.mrna.LG1.57.3	m.4635	ENSDART00000045679.8	83.42	0	733
on.mrna.LG1.57.4	m.4643	ENSDART00000045679.8	83.52	0	668
on.mrna.LG1.57.5	m.4646	ENSDART00000045679.8	83.42	0	733
on.mrna.LG1.57.6	m.4644	ENSDART00000045679.8	83.52	0	668
on.mrna.LG1.57.7	m.4636	ENSDART00000045679.8	83.42	0	733
on.mrna.LG1.57.8	m.4642	ENSDART00000045679.8	83.42	0	733
on.mrna.LG1.57.9	m.4639	ENSDART00000045679.8	83.42	0	733
on.mrna.LG1.570.1	m.3714	ENSDART00000169974.1	89.23	5e-12	73.8
on.mrna.LG1.570.2	m.3712	ENSDART00000169974.1	89.23	5e-12	73.8
on.mrna.LG1.570.3	m.3716	ENSDART00000169974.1	89.23	5e-12	73.8
on.mrna.LG1.571.1	m.4648	ENSDART00000157564.1	85.36	9e-49	196
on.mrna.LG1.572.1	m.3576	ENSDART00000162513.1	80.89	4e-136	486
on.mrna.LG1.572.2	m.3573	ENSDART00000162513.1	80.61	0	666
on.mrna.LG1.573.1	m.4581	ENSDART00000164374.1	81.89	6e-100	367
on.mrna.LG1.573.2	m.4585	ENSDART00000164374.1	81.89	6e-100	367
on.mrna.LG1.573.3	m.4579	ENSDART00000164374.1	81.89	6e-100	367
on.mrna.LG1.573.4	m.4583	ENSDART00000162633.1	82.75	1e-63	246
on.mrna.LG1.573.5	m.4578	ENSDART00000162633.1	82.75	2e-63	246
on.mrna.LG1.573.6	m.4584	ENSDART00000162633.1	82.75	1e-63	246
on.mrna.LG1.574.1	m.2392	ENSDART00000157434.1	84	1e-27	125
on.mrna.LG1.574.2	m.2387	ENSDART00000157434.1	84	2e-27	125
on.mrna.LG1.574.3	m.2389	ENSDART00000157434.1	84	2e-27	125
on.mrna.LG1.575.1	m.2673	ENSDART00000109605.3	86.49	7e-10	67.9
on.mrna.LG1.575.2	m.2684	ENSDART00000109605.3	84.47	4e-36	155
on.mrna.LG1.575.3	m.2678	ENSDART00000109605.3	84.47	4e-36	155
on.mrna.LG1.576.1	m.563	ENSDART00000142665.2	82.14	7e-121	434
on.mrna.LG1.576.2	m.562	ENSDART00000142665.2	82.14	8e-121	434
on.mrna.LG1.576.3	m.564	ENSDART00000142665.2	82.14	8e-121	434
on.mrna.LG1.576.4	m.561	ENSDART00000142665.2	82.14	8e-121	434
on.mrna.LG1.578.1	m.5074	ENSDART00000154442.2	95.45	1.6	36.2
on.mrna.LG1.579.1	m.5574	ENSDART00000171881.1	78.82	6e-55	216
on.mrna.LG1.58.1	m.3859	ENSDART00000074729.5	81.41	3e-50	202
on.mrna.LG1.58.2	m.3862	ENSDART00000074729.5	81.41	3e-50	202
on.mrna.LG1.58.3	m.3856	ENSDART00000074729.5	81.41	3e-50	202
on.mrna.LG1.580.1	m.5210	ENSDART00000110287.3	100	0.62	36.2
on.mrna.LG1.581.1	m.1757	ENSDART00000114158.3	91.43	0.003	46.1
on.mrna.LG1.581.1	m.1760	ENSDART00000125309.2	95.83	0.066	40.1
on.mrna.LG1.582.1	m.515	ENSDART00000158040.1	82.55	3e-39	165
on.mrna.LG1.583.1	m.2987	ENSDART00000034523.7	84.87	9e-26	119
on.mrna.LG1.583.2	m.2989	ENSDART00000034523.7	81.72	2e-36	155
on.mrna.LG1.583.3	m.2992	ENSDART00000131402.2	100	0.057	40.1
on.mrna.LG1.583.4	m.2988	ENSDART00000034523.7	77.96	2e-40	168
on.mrna.LG1.583.5	m.2985	ENSDART00000165180.1	83.14	2e-39	165
on.mrna.LG1.583.6	m.2983	ENSDART00000165180.1	79.56	5e-109	396
on.mrna.LG1.583.7	m.2981	ENSDART00000165180.1	79.49	4e-116	420
on.mrna.LG1.583.8	m.2979	ENSDART00000165180.1	78.9	2e-55	218
on.mrna.LG1.583.9	m.2990	ENSDART00000165180.1	79.61	2e-80	301
on.mrna.LG1.584.1	m.896	ENSDART00000003418.9	100	0.005	44.1
on.mrna.LG1.584.2	m.894	ENSDART00000003418.9	100	0.004	44.1
on.mrna.LG1.584.3	m.893	ENSDART00000003418.9	100	0.005	44.1
on.mrna.LG1.584.4	m.897	ENSDART00000003418.9	100	0.005	44.1
on.mrna.LG1.5840001.1	m.4006	ENSDART00000097696.1	82.35	0.041	40.1
on.mrna.LG1.585.1	m.2101	ENSDART00000090483.7	83.76	7e-15	81.8
on.mrna.LG1.587.1	m.3201	ENSDART00000098076.4	80.82	3e-146	519
on.mrna.LG1.587.2	m.3199	ENSDART00000098076.4	80.82	3e-146	519
on.mrna.LG1.587.3	m.3200	ENSDART00000098076.4	80.82	3e-146	519
on.mrna.LG1.588.1	m.3238	ENSDART00000067373.4	81.72	9e-20	99.6
on.mrna.LG1.588.2	m.3237	ENSDART00000067373.4	81.72	1e-19	99.6
on.mrna.LG1.589.1	m.3910	ENSDART00000161538.1	82.05	2e-09	65.9
on.mrna.LG1.589.2	m.3909	ENSDART00000161538.1	82.24	2e-08	61.9
on.mrna.LG1.59.1	m.2630	ENSDART00000139441.1	80.31	3e-63	244
on.mrna.LG1.59.1	m.2631	ENSDART00000139441.1	84.16	4e-34	147
on.mrna.LG1.590.1	m.3558	ENSDART00000009393.7	100	0.004	44.1
on.mrna.LG1.591.1	m.2913	ENSDART00000110330.3	100	1.3	36.2
on.mrna.LG1.592.1	m.5786	ENSDART00000164579.1	100	0.11	38.2
on.mrna.LG1.593.1	m.5248	ENSDART00000078568.4	100	0.67	36.2
on.mrna.LG1.594.1	m.1704	ENSDART00000131482.1	100	1.2	34.2
on.mrna.LG1.595.1	m.342	ENSDART00000165603.1	81.27	1e-47	192
on.mrna.LG1.596.1	m.3062	ENSDART00000157801.1	83.78	2e-21	103
on.mrna.LG1.596.2	m.3064	ENSDART00000157801.1	83.78	2e-21	103
on.mrna.LG1.596.3	m.3070	ENSDART00000157801.1	83.78	2e-21	103
on.mrna.LG1.596.4	m.3068	ENSDART00000157801.1	83.78	2e-21	103
on.mrna.LG1.596.5	m.3066	ENSDART00000157801.1	83.78	2e-21	103
on.mrna.LG1.596.6	m.3060	ENSDART00000157801.1	90.32	0.098	38.2
on.mrna.LG1.597.1	m.275	ENSDART00000138087.1	84.13	2e-45	182
on.mrna.LG1.598.1	m.4257	ENSDART00000007584.7	85.15	2e-87	323
on.mrna.LG1.598.2	m.4265	ENSDART00000007584.7	87.92	1e-54	214
on.mrna.LG1.598.3	m.4260	ENSDART00000007584.7	87.92	6e-55	214
on.mrna.LG1.598.4	m.4262	ENSDART00000007584.7	87.92	8e-55	214
on.mrna.LG1.599.1	m.2379	ENSDART00000080160.6	87.02	1e-27	125
on.mrna.LG1.599.2	m.2377	ENSDART00000080160.6	87.02	1e-27	125
on.mrna.LG1.599.3	m.2381	ENSDART00000080160.6	83.33	2e-22	107
on.mrna.LG1.599.4	m.2378	ENSDART00000080160.6	83.33	2e-22	107
on.mrna.LG1.599.5	m.2380	ENSDART00000080160.6	83.33	2e-22	107
on.mrna.LG1.599.6	m.2375	ENSDART00000080160.6	87.02	1e-27	125
on.mrna.LG1.599.7	m.2376	ENSDART00000080160.6	87.02	1e-27	125
on.mrna.LG1.6.1	m.1008	ENSDART00000162653.1	84.24	2e-26	121
on.mrna.LG1.6.2	m.1006	ENSDART00000162653.1	84.24	3e-26	121
on.mrna.LG1.600.1	m.5937	ENSDART00000046542.6	83.49	2e-34	147
on.mrna.LG1.600.2	m.5927	ENSDART00000046542.6	83.49	2e-34	147
on.mrna.LG1.600.3	m.5929	ENSDART00000046542.6	80.17	3e-44	182
on.mrna.LG1.601.1	m.856	ENSDART00000109315.3	100	0.097	38.2
on.mrna.LG1.603.1	m.4030	ENSDART00000058339.6	82.85	4e-94	345
on.mrna.LG1.604.1	m.3556	ENSDART00000128183.3	85.58	8e-16	87.7
on.mrna.LG1.605.1	m.3157	ENSDART00000128183.3	81.54	5e-20	101
on.mrna.LG1.605.2	m.3155	ENSDART00000128183.3	81.54	5e-20	101
on.mrna.LG1.607.1	m.83	ENSDART00000083919.5	85.85	3e-17	91.7
on.mrna.LG1.607.2	m.93	ENSDART00000083919.5	85.85	4e-17	91.7
on.mrna.LG1.607.3	m.88	ENSDART00000083919.5	85.85	3e-17	91.7
on.mrna.LG1.608.1	m.5605	ENSDART00000031049.7	81.06	5e-33	145
on.mrna.LG1.608.2	m.5609	ENSDART00000031049.7	81.06	5e-33	145
on.mrna.LG1.609.1	m.5413	ENSDART00000126011.2	84.56	1e-20	103
on.mrna.LG1.61.1	m.3357	ENSDART00000090310.4	81.97	8e-120	432
on.mrna.LG1.6100001.1	m.5026	ENSDART00000123157.2	100	0.3	36.2
on.mrna.LG1.611.1	m.3652	ENSDART00000027331.9	83.93	0.048	40.1
on.mrna.LG1.611.2	m.3650	ENSDART00000027331.9	83.93	0.049	40.1
on.mrna.LG1.612.1	m.5093	ENSDART00000112980.4	86.49	1e-10	67.9
on.mrna.LG1.613.1	m.6206	ENSDART00000158517.2	82.09	0	983
on.mrna.LG1.613.2	m.6204	ENSDART00000158517.2	81.99	0	646
on.mrna.LG1.613.3	m.6208	ENSDART00000158517.2	81.99	0	646
on.mrna.LG1.613.4	m.6207	ENSDART00000158517.2	81.99	0	646
on.mrna.LG1.613.5	m.6205	ENSDART00000158517.2	82.09	0	983
on.mrna.LG1.614.1	m.548	ENSDART00000030919.6	86.44	3e-06	54
on.mrna.LG1.615.1	m.2925	ENSDART00000156832.2	80.98	8e-94	347
on.mrna.LG1.615.2	m.2920	ENSDART00000156832.2	80.98	8e-94	347
on.mrna.LG1.615.3	m.2915	ENSDART00000156832.2	83.49	2e-54	216
on.mrna.LG1.616.1	m.2872	ENSDART00000008808.8	81.15	2e-79	297
on.mrna.LG1.616.2	m.2874	ENSDART00000008808.8	81.15	2e-79	297
on.mrna.LG1.616.3	m.2876	ENSDART00000008808.8	81.04	2e-69	264
on.mrna.LG1.617.1	m.4172	ENSDART00000108712.3	87.66	2e-36	155
on.mrna.LG1.617.2	m.4170	ENSDART00000108712.3	87.66	3e-36	155
on.mrna.LG1.618.1	m.3623	ENSDART00000075743.5	80.18	1e-58	230
on.mrna.LG1.618.2	m.3608	ENSDART00000075743.5	80.18	9e-59	230
on.mrna.LG1.618.3	m.3605	ENSDART00000075743.5	84.6	6e-113	410
on.mrna.LG1.618.4	m.3614	ENSDART00000075743.5	84.6	5e-113	410
on.mrna.LG1.618.5	m.3617	ENSDART00000075743.5	81.23	0	757
on.mrna.LG1.618.6	m.3602	ENSDART00000075743.5	81.23	0	757
on.mrna.LG1.618.7	m.3611	ENSDART00000075743.5	81.23	0	757
on.mrna.LG1.618.8	m.3620	ENSDART00000075743.5	81.23	0	757
on.mrna.LG1.619.1	m.5846	ENSDART00000099984.3	81.3	6e-62	238
on.mrna.LG1.62.1	m.4035	ENSDART00000090334.4	82.71	3e-70	268
on.mrna.LG1.62.2	m.4040	ENSDART00000100104.3	93.1	0.018	42.1
on.mrna.LG1.62.3	m.4033	ENSDART00000100104.3	83.7	5e-28	127
on.mrna.LG1.62.4	m.4038	ENSDART00000138103.1	85	4e-47	190
on.mrna.LG1.621.1	m.4397	ENSDART00000013363.8	84.88	5e-10	67.9
on.mrna.LG1.621.2	m.4401	ENSDART00000013363.8	84.88	5e-10	67.9
on.mrna.LG1.622.1	m.642	ENSDART00000027242.5	84.16	4e-12	73.8
on.mrna.LG1.622.2	m.638	ENSDART00000027242.5	84.16	3e-12	73.8
on.mrna.LG1.623.1	m.6097	ENSDART00000109942.3	82.35	2e-22	109
on.mrna.LG1.623.2	m.6100	ENSDART00000109942.3	82.35	2e-22	109
on.mrna.LG1.623.3	m.6099	ENSDART00000109942.3	82.35	2e-22	109
on.mrna.LG1.623.4	m.6098	ENSDART00000109942.3	82.35	2e-22	109
on.mrna.LG1.623.5	m.6101	ENSDART00000109942.3	82.35	2e-22	109
on.mrna.LG1.624.1	m.2186	ENSDART00000005740.10	84.66	5e-77	289
on.mrna.LG1.624.2	m.2188	ENSDART00000005740.10	84.66	5e-77	289
on.mrna.LG1.628.1	m.5823	ENSDART00000000005.6	100	0.11	40.1
on.mrna.LG1.628.2	m.5809	ENSDART00000000005.6	100	0.12	40.1
on.mrna.LG1.628.3	m.5816	ENSDART00000000005.6	100	0.11	40.1
on.mrna.LG1.628.4	m.5829	ENSDART00000000005.6	100	0.11	40.1
on.mrna.LG1.628.5	m.5826	ENSDART00000000005.6	100	0.12	40.1
on.mrna.LG1.628.6	m.5812	ENSDART00000000005.6	100	0.12	40.1
on.mrna.LG1.628.7	m.5819	ENSDART00000000005.6	100	0.13	40.1
on.mrna.LG1.629.1	m.4869	ENSDART00000010046.7	82.03	3e-11	71.9
on.mrna.LG1.629.2	m.4868	ENSDART00000010046.7	82.03	3e-11	71.9
on.mrna.LG1.63.1	m.2335	ENSDART00000052404.5	80.07	9e-94	345
on.mrna.LG1.630.1	m.2583	ENSDART00000075782.6	78.37	6e-89	329
on.mrna.LG1.630.2	m.2581	ENSDART00000075782.6	78.95	1e-80	301
on.mrna.LG1.630.3	m.2580	ENSDART00000075782.6	78.76	1e-83	311
on.mrna.LG1.631.1	m.3473	ENSDART00000016265.7	82.61	0.0006	48.1
on.mrna.LG1.631.1	m.3474	ENSDART00000016265.7	82.61	0.0004	48.1
on.mrna.LG1.631.2	m.3480	ENSDART00000016265.7	82.61	0.0006	48.1
on.mrna.LG1.631.2	m.3481	ENSDART00000016265.7	82.61	0.0004	48.1
on.mrna.LG1.631.3	m.3466	ENSDART00000016265.7	82.61	0.0006	48.1
on.mrna.LG1.631.3	m.3467	ENSDART00000016265.7	82.61	0.0004	48.1
on.mrna.LG1.632.1	m.4060	ENSDART00000006436.7	100	6.3	34.2
on.mrna.LG1.632.2	m.4070	ENSDART00000006436.7	100	5	34.2
on.mrna.LG1.632.3	m.4065	ENSDART00000006436.7	100	4.1	34.2
on.mrna.LG1.632.4	m.4056	ENSDART00000006436.7	100	3.2	34.2
on.mrna.LG1.633.1	m.857	ENSDART00000110907.4	81.23	2e-40	168
on.mrna.LG1.634.1	m.1876	ENSDART00000112543.3	80.02	0	844
on.mrna.LG1.634.2	m.1867	ENSDART00000112543.3	79.5	0	1076
on.mrna.LG1.634.3	m.1871	ENSDART00000112543.3	79.9	0	803
on.mrna.LG1.634.4	m.1863	ENSDART00000112543.3	79.41	0	1035
on.mrna.LG1.635.1	m.5204	ENSDART00000004120.10	80.81	0	640
on.mrna.LG1.638.2	m.5159	ENSDART00000054552.7	83.13	9e-06	54
on.mrna.LG1.638.3	m.5173	ENSDART00000054552.7	83.13	9e-06	54
on.mrna.LG1.638.4	m.5166	ENSDART00000054552.7	83.13	9e-06	54
on.mrna.LG1.639.1	m.3022	ENSDART00000016294.7	100	0.62	36.2
on.mrna.LG1.639.2	m.3024	ENSDART00000016294.7	100	0.62	36.2
on.mrna.LG1.639.3	m.3021	ENSDART00000016294.7	100	0.5	36.2
on.mrna.LG1.640.1	m.5118	ENSDART00000012234.7	80.34	6e-42	172
on.mrna.LG1.640.2	m.5119	ENSDART00000012234.7	79.92	2e-19	97.6
on.mrna.LG1.641.1	m.46	ENSDART00000022008.6	100	1.7	36.2
on.mrna.LG1.641.2	m.50	ENSDART00000022008.6	100	1.3	36.2
on.mrna.LG1.641.3	m.42	ENSDART00000022008.6	100	1.5	36.2
on.mrna.LG1.641.4	m.41	ENSDART00000022008.6	100	1.1	36.2
on.mrna.LG1.642.1	m.974	ENSDART00000150148.2	83.33	2e-61	238
on.mrna.LG1.642.2	m.968	ENSDART00000150148.2	84.23	6e-39	163
on.mrna.LG1.642.3	m.966	ENSDART00000150148.2	84.23	6e-39	163
on.mrna.LG1.642.4	m.970	ENSDART00000150148.2	83.33	2e-61	238
on.mrna.LG1.642.5	m.972	ENSDART00000150148.2	83.33	2e-61	238
on.mrna.LG1.644.1	m.2945	ENSDART00000019991.8	88.24	3e-11	71.9
on.mrna.LG1.645.1	m.3507	ENSDART00000173034.1	100	0.007	44.1
on.mrna.LG1.646.1	m.4254	ENSDART00000129926.3	95.65	0.32	38.2
on.mrna.LG1.648.1	m.6081	ENSDART00000114592.3	92.31	5e-06	54
on.mrna.LG1.65.1	m.1302	ENSDART00000045374.7	83.6	0	852
on.mrna.LG1.65.2	m.1304	ENSDART00000045374.7	83.51	0	684
on.mrna.LG1.651.1	m.2574	ENSDART00000022242.9	100	0.49	36.2
on.mrna.LG1.652.1	m.4481	ENSDART00000128321.2	93.1	0.014	42.1
on.mrna.LG1.653.1	m.2595	ENSDART00000020456.6	79.77	9e-70	266
on.mrna.LG1.654.1	m.23	ENSDART00000164657.1	81.51	1e-80	301
on.mrna.LG1.654.2	m.29	ENSDART00000164657.1	79.58	1e-83	311
on.mrna.LG1.654.3	m.35	ENSDART00000164657.1	79.46	3e-77	289
on.mrna.LG1.654.4	m.27	ENSDART00000164657.1	81.47	3e-74	280
on.mrna.LG1.654.5	m.37	ENSDART00000164657.1	79.73	5e-83	309
on.mrna.LG1.654.6	m.33	ENSDART00000164657.1	79.62	1e-76	287
on.mrna.LG1.654.7	m.21	ENSDART00000164657.1	79.01	5e-48	192
on.mrna.LG1.655.1	m.5743	ENSDART00000124075.2	78.92	3e-23	111
on.mrna.LG1.656.1	m.4301	ENSDART00000109511.4	85.27	3e-21	105
on.mrna.LG1.657.1	m.4268	ENSDART00000109511.4	91.3	4e-25	119
on.mrna.LG1.657.1	m.4269	ENSDART00000109511.4	91.3	1e-25	119
on.mrna.LG1.658.1	m.3709	ENSDART00000114669.4	81.82	7e-31	137
on.mrna.LG1.658.2	m.3707	ENSDART00000114669.4	81.82	7e-31	137
on.mrna.LG1.659.1	m.4355	ENSDART00000098942.4	84.05	6e-60	234
on.mrna.LG1.659.2	m.4357	ENSDART00000098942.4	84.05	6e-60	234
on.mrna.LG1.659.3	m.4359	ENSDART00000098942.4	84.01	3e-58	228
on.mrna.LG1.659.4	m.4353	ENSDART00000098942.4	84.05	6e-60	234
on.mrna.LG1.660.1	m.1063	ENSDART00000105215.2	81.33	2e-19	99.6
on.mrna.LG1.660.2	m.1070	ENSDART00000105215.2	81.33	2e-19	99.6
on.mrna.LG1.661.1	m.5282	ENSDART00000112651.3	81.4	6e-72	276
on.mrna.LG1.661.2	m.5294	ENSDART00000112651.3	81.4	6e-72	276
on.mrna.LG1.661.3	m.5330	ENSDART00000112651.3	81.4	6e-72	276
on.mrna.LG1.661.4	m.5306	ENSDART00000112651.3	81.4	6e-72	276
on.mrna.LG1.661.5	m.5342	ENSDART00000112651.3	81.4	6e-72	276
on.mrna.LG1.661.6	m.5318	ENSDART00000112651.3	81.4	6e-72	276
on.mrna.LG1.662.1	m.5920	ENSDART00000110794.3	100	6.7	32.2
on.mrna.LG1.662.2	m.5916	ENSDART00000110794.3	100	5.6	32.2
on.mrna.LG1.665.1	m.240	ENSDART00000123174.3	85.29	1e-06	56
on.mrna.LG1.666.1	m.5700	ENSDART00000052584.6	81.45	7e-24	113
on.mrna.LG1.667.1	m.1988	ENSDART00000052584.6	79.58	4e-83	311
on.mrna.LG1.668.1	m.2570	ENSDART00000110552.4	79.89	2e-11	71.9
on.mrna.LG1.67.1	m.505	ENSDART00000100569.4	84.91	6e-15	83.8
on.mrna.LG1.671.1	m.6209	ENSDART00000141211.1	83.1	0.0009	46.1
on.mrna.LG1.672.1	m.1354	ENSDART00000166308.1	82.99	2e-18	93.7
on.mrna.LG1.672.2	m.1353	ENSDART00000166308.1	82.99	2e-18	93.7
on.mrna.LG1.673.1	m.2754	ENSDART00000103638.5	80.43	6e-116	418
on.mrna.LG1.673.2	m.2756	ENSDART00000103638.5	80.43	6e-116	418
on.mrna.LG1.673.3	m.2753	ENSDART00000103638.5	80.43	6e-116	418
on.mrna.LG1.674.1	m.3373	ENSDART00000170671.1	82.43	1e-58	228
on.mrna.LG1.674.2	m.3376	ENSDART00000170671.1	84.38	2e-54	214
on.mrna.LG1.674.2	m.3377	ENSDART00000170671.1	84.43	4e-55	216
on.mrna.LG1.675.1	m.4286	ENSDART00000128140.2	86.96	1e-15	87.7
on.mrna.LG1.675.2	m.4289	ENSDART00000128140.2	86.96	1e-15	87.7
on.mrna.LG1.675.3	m.4278	ENSDART00000128140.2	86.96	1e-15	87.7
on.mrna.LG1.675.4	m.4282	ENSDART00000128140.2	86.96	1e-15	87.7
on.mrna.LG1.677.1	m.1049	ENSDART00000081338.3	80.32	5e-54	214
on.mrna.LG1.677.2	m.1043	ENSDART00000081338.3	80.32	5e-54	214
on.mrna.LG1.678.1	m.234	ENSDART00000073447.5	81.18	4e-67	258
on.mrna.LG1.678.2	m.237	ENSDART00000073447.5	81.18	3e-67	258
on.mrna.LG1.679.1	m.3102	ENSDART00000128105.2	90.32	3e-12	75.8
on.mrna.LG1.679.1	m.3103	ENSDART00000128105.2	90.32	2e-12	75.8
on.mrna.LG1.679.2	m.3115	ENSDART00000128105.2	90.32	3e-12	75.8
on.mrna.LG1.679.2	m.3116	ENSDART00000128105.2	90.32	2e-12	75.8
on.mrna.LG1.679.3	m.3093	ENSDART00000128105.2	90.32	4e-12	75.8
on.mrna.LG1.679.4	m.3122	ENSDART00000128105.2	90.32	4e-12	75.8
on.mrna.LG1.679.5	m.3109	ENSDART00000128105.2	90.32	4e-12	75.8
on.mrna.LG1.679.6	m.3097	ENSDART00000128105.2	90.32	4e-12	75.8
on.mrna.LG1.68.1	m.2204	ENSDART00000098712.4	79.47	2e-06	54
on.mrna.LG1.680.1	m.3928	ENSDART00000052365.6	85.58	1e-44	180
on.mrna.LG1.680.2	m.3926	ENSDART00000052365.6	85.58	1e-44	180
on.mrna.LG1.681.1	m.3251	ENSDART00000052366.5	81.5	3e-25	117
on.mrna.LG1.6810001.1	m.5854	ENSDART00000052366.5	83.51	4e-10	65.9
on.mrna.LG1.682.1	m.4046	ENSDART00000009386.10	81.29	6e-29	131
on.mrna.LG1.682.2	m.4043	ENSDART00000009386.10	81.29	6e-29	131
on.mrna.LG1.682.3	m.4049	ENSDART00000009386.10	81.48	1e-14	83.8
on.mrna.LG1.684.1	m.426	ENSDART00000158456.1	100	2.3	36.2
on.mrna.LG1.684.1	m.427	ENSDART00000158456.1	100	2.3	36.2
on.mrna.LG1.685.1	m.5049	ENSDART00000122009.2	78.19	9e-64	246
on.mrna.LG1.685.2	m.5054	ENSDART00000122009.2	78.19	1e-63	246
on.mrna.LG1.685.3	m.5059	ENSDART00000122009.2	83.33	7e-84	313
on.mrna.LG1.685.4	m.5045	ENSDART00000122009.2	83.33	7e-84	313
on.mrna.LG1.685.5	m.5044	ENSDART00000122009.2	83.33	5e-84	313
on.mrna.LG1.686.1	m.4079	ENSDART00000027115.8	85.71	9e-08	60
on.mrna.LG1.686.2	m.4083	ENSDART00000027115.8	85.71	8e-08	60
on.mrna.LG1.686.3	m.4075	ENSDART00000027115.8	85.71	6e-08	60
on.mrna.LG1.687.1	m.3522	ENSDART00000013150.6	77.86	2e-52	208
on.mrna.LG1.688.1	m.2719	ENSDART00000014632.9	87.37	1e-17	93.7
on.mrna.LG1.689.1	m.3549	ENSDART00000102260.5	100	0.38	36.2
on.mrna.LG1.69.1	m.5035	ENSDART00000005750.5	84.25	1e-138	494
on.mrna.LG1.690.1	m.1463	ENSDART00000077251.5	81.73	0	731
on.mrna.LG1.690.10	m.1519	ENSDART00000077251.5	81.73	0	731
on.mrna.LG1.690.11	m.1434	ENSDART00000077251.5	82.03	0	710
on.mrna.LG1.690.12	m.1455	ENSDART00000077251.5	82.03	0	710
on.mrna.LG1.690.13	m.1489	ENSDART00000077251.5	81.73	0	731
on.mrna.LG1.690.14	m.1524	ENSDART00000077251.5	81.73	0	731
on.mrna.LG1.690.15	m.1402	ENSDART00000077251.5	82.03	0	710
on.mrna.LG1.690.16	m.1431	ENSDART00000077251.5	81.73	0	731
on.mrna.LG1.690.17	m.1487	ENSDART00000077251.5	81.73	0	731
on.mrna.LG1.690.18	m.1492	ENSDART00000077251.5	82.03	0	710
on.mrna.LG1.690.19	m.1419	ENSDART00000077251.5	82.03	0	710
on.mrna.LG1.690.2	m.1505	ENSDART00000077251.5	82.03	0	710
on.mrna.LG1.690.20	m.1483	ENSDART00000077251.5	81.73	0	731
on.mrna.LG1.690.21	m.1479	ENSDART00000077251.5	81.73	0	731
on.mrna.LG1.690.22	m.1496	ENSDART00000077251.5	82.03	0	710
on.mrna.LG1.690.23	m.1427	ENSDART00000077251.5	82.03	0	710
on.mrna.LG1.690.24	m.1474	ENSDART00000077251.5	81.73	0	731
on.mrna.LG1.690.25	m.1443	ENSDART00000077251.5	81.73	0	731
on.mrna.LG1.690.26	m.1458	ENSDART00000077251.5	82.03	0	710
on.mrna.LG1.690.27	m.1414	ENSDART00000077251.5	81.73	0	731
on.mrna.LG1.690.28	m.1438	ENSDART00000077251.5	82.03	0	710
on.mrna.LG1.690.29	m.1471	ENSDART00000077251.5	82.03	0	710
on.mrna.LG1.690.3	m.1407	ENSDART00000077251.5	82.03	0	710
on.mrna.LG1.690.30	m.1410	ENSDART00000077251.5	81.73	0	731
on.mrna.LG1.690.31	m.1405	ENSDART00000077251.5	81.73	0	731
on.mrna.LG1.690.32	m.1423	ENSDART00000077251.5	82.03	0	710
on.mrna.LG1.690.33	m.1501	ENSDART00000077251.5	81.73	0	731
on.mrna.LG1.690.34	m.1508	ENSDART00000077251.5	82.03	0	710
on.mrna.LG1.690.35	m.1464	ENSDART00000077251.5	82.03	0	710
on.mrna.LG1.690.36	m.1453	ENSDART00000077251.5	82.03	0	710
on.mrna.LG1.690.37	m.1451	ENSDART00000077251.5	81.73	0	731
on.mrna.LG1.690.38	m.1469	ENSDART00000077251.5	81.73	0	731
on.mrna.LG1.690.39	m.1511	ENSDART00000077251.5	82.03	0	710
on.mrna.LG1.690.4	m.1447	ENSDART00000077251.5	81.73	0	731
on.mrna.LG1.690.40	m.1514	ENSDART00000077251.5	82.03	0	710
on.mrna.LG1.690.41	m.1436	ENSDART00000077251.5	81.73	0	731
on.mrna.LG1.690.42	m.1440	ENSDART00000077251.5	81.73	0	731
on.mrna.LG1.690.43	m.1516	ENSDART00000077251.5	82.03	0	710
on.mrna.LG1.690.44	m.1521	ENSDART00000077251.5	81.73	0	731
on.mrna.LG1.690.5	m.1466	ENSDART00000077251.5	81.73	0	731
on.mrna.LG1.690.6	m.1450	ENSDART00000077251.5	82.03	0	710
on.mrna.LG1.690.7	m.1413	ENSDART00000077251.5	82.03	0	710
on.mrna.LG1.690.8	m.1504	ENSDART00000077251.5	81.73	0	731
on.mrna.LG1.690.9	m.1426	ENSDART00000077251.5	81.73	0	731
on.mrna.LG1.691.1	m.5396	ENSDART00000140089.1	82.69	4e-18	95.6
on.mrna.LG1.691.2	m.5403	ENSDART00000140089.1	82.69	4e-18	95.6
on.mrna.LG1.691.3	m.5389	ENSDART00000140089.1	82.69	4e-18	95.6
on.mrna.LG1.691.4	m.5408	ENSDART00000140089.1	82.69	4e-18	95.6
on.mrna.LG1.692.1	m.5564	ENSDART00000011967.6	81.64	1e-55	218
on.mrna.LG1.692.10	m.5552	ENSDART00000011967.6	82.47	5e-35	149
on.mrna.LG1.692.2	m.5562	ENSDART00000011967.6	81.64	1e-55	218
on.mrna.LG1.692.3	m.5550	ENSDART00000011967.6	82	1e-23	111
on.mrna.LG1.692.4	m.5554	ENSDART00000011967.6	82	1e-23	111
on.mrna.LG1.692.5	m.5558	ENSDART00000011967.6	82.47	8e-35	149
on.mrna.LG1.692.6	m.5560	ENSDART00000011967.6	82.47	8e-35	149
on.mrna.LG1.692.7	m.5568	ENSDART00000011967.6	82	1e-23	111
on.mrna.LG1.692.8	m.5556	ENSDART00000011967.6	82	1e-23	111
on.mrna.LG1.692.9	m.5566	ENSDART00000011967.6	81.64	8e-56	218
on.mrna.LG1.694.1	m.3212	ENSDART00000075757.3	84.94	3e-47	188
on.mrna.LG1.694.2	m.3209	ENSDART00000075757.3	84.94	4e-47	188
on.mrna.LG1.695.1	m.526	ENSDART00000136059.2	86.09	2e-20	101
on.mrna.LG1.695.2	m.538	ENSDART00000136059.2	95.56	4e-12	73.8
on.mrna.LG1.695.3	m.530	ENSDART00000136059.2	86.09	2e-20	101
on.mrna.LG1.695.4	m.522	ENSDART00000136059.2	86.09	2e-20	101
on.mrna.LG1.695.5	m.534	ENSDART00000136059.2	95.56	4e-12	73.8
on.mrna.LG1.695.6	m.518	ENSDART00000136059.2	95.56	3e-12	73.8
on.mrna.LG1.696.1	m.1703	ENSDART00000093004.4	100	0.0005	46.1
on.mrna.LG1.696.2	m.1701	ENSDART00000093004.4	100	0.0005	46.1
on.mrna.LG1.696.3	m.1702	ENSDART00000093004.4	100	0.0003	46.1
on.mrna.LG1.698.1	m.899	ENSDART00000162614.1	100	0.36	36.2
on.mrna.LG1.7.1	m.303	ENSDART00000162653.1	82.7	2e-23	113
on.mrna.LG1.70.1	m.2099	ENSDART00000067332.3	82.23	3e-76	287
on.mrna.LG1.700.1	m.3044	ENSDART00000064509.6	92.31	5e-07	56
on.mrna.LG1.700.2	m.3041	ENSDART00000064509.6	92.31	5e-07	56
on.mrna.LG1.700.3	m.3036	ENSDART00000048375.6	83.12	2e-05	50.1
on.mrna.LG1.700.4	m.3039	ENSDART00000064509.6	92.31	6e-07	56
on.mrna.LG1.701.1	m.2271	ENSDART00000139918.1	81.42	1e-95	351
on.mrna.LG1.701.2	m.2269	ENSDART00000139918.1	82.96	5e-76	285
on.mrna.LG1.702.1	m.59	ENSDART00000103612.4	100	3.8	34.2
on.mrna.LG1.703.1	m.3215	ENSDART00000157833.1	100	0.48	36.2
on.mrna.LG1.703.2	m.3219	ENSDART00000157833.1	100	0.55	36.2
on.mrna.LG1.704.1	m.1590	ENSDART00000139598.3	100	0.19	38.2
on.mrna.LG1.704.2	m.1596	ENSDART00000139598.3	100	0.19	38.2
on.mrna.LG1.704.3	m.1594	ENSDART00000139598.3	100	0.19	38.2
on.mrna.LG1.704.4	m.1592	ENSDART00000139598.3	100	0.19	38.2
on.mrna.LG1.705.1	m.5112	ENSDART00000039485.6	82.42	6e-52	204
on.mrna.LG1.7050001.1	m.2845	ENSDART00000164975.1	100	0.077	38.2
on.mrna.LG1.7050001.2	m.2846	ENSDART00000164975.1	100	0.077	38.2
on.mrna.LG1.709.1	m.4231	ENSDART00000146472.1	87.88	4e-10	67.9
on.mrna.LG1.709.1	m.4233	ENSDART00000073600.4	100	0.065	40.1
on.mrna.LG1.71.1	m.3913	ENSDART00000035067.7	78.77	4e-96	353
on.mrna.LG1.71.2	m.3912	ENSDART00000035067.7	78.77	4e-96	353
on.mrna.LG1.710.1	m.1399	ENSDART00000008807.7	83.26	6e-80	297
on.mrna.LG1.710.2	m.1393	ENSDART00000008807.7	83.87	2e-95	349
on.mrna.LG1.710.3	m.1396	ENSDART00000008807.7	83.26	6e-80	297
on.mrna.LG1.714.1	m.4007	ENSDART00000076830.4	100	0.04	40.1
on.mrna.LG1.715.1	m.3845	ENSDART00000101537.4	82.19	3e-98	361
on.mrna.LG1.716.1	m.3146	ENSDART00000113905.3	81.93	1e-73	280
on.mrna.LG1.716.1	m.3147	ENSDART00000113905.3	81.93	4e-74	280
on.mrna.LG1.716.2	m.3139	ENSDART00000113905.3	81.93	8e-74	280
on.mrna.LG1.716.2	m.3140	ENSDART00000113905.3	81.93	4e-74	280
on.mrna.LG1.716.3	m.3150	ENSDART00000113905.3	81.93	6e-74	280
on.mrna.LG1.716.3	m.3151	ENSDART00000113905.3	81.93	4e-74	280
on.mrna.LG1.716.4	m.3143	ENSDART00000113905.3	81.93	5e-74	280
on.mrna.LG1.716.4	m.3144	ENSDART00000113905.3	81.93	4e-74	280
on.mrna.LG1.716.5	m.3135	ENSDART00000113905.3	81.93	6e-74	280
on.mrna.LG1.716.5	m.3136	ENSDART00000113905.3	81.93	4e-74	280
on.mrna.LG1.717.1	m.2148	ENSDART00000109698.3	100	0.26	36.2
on.mrna.LG1.718.1	m.5498	ENSDART00000052750.6	89.13	4e-06	52
on.mrna.LG1.7180001.1	m.2229	ENSDART00000052750.6	81.05	0.0004	46.1
on.mrna.LG1.719.1	m.5203	ENSDART00000052750.6	82.76	1e-06	54
on.mrna.LG1.720.1	m.1615	ENSDART00000024919.8	93.02	3e-08	61.9
on.mrna.LG1.720.10	m.1608	ENSDART00000024919.8	93.02	2e-08	61.9
on.mrna.LG1.720.11	m.1628	ENSDART00000024919.8	93.02	3e-08	61.9
on.mrna.LG1.720.12	m.1624	ENSDART00000024919.8	93.02	3e-08	61.9
on.mrna.LG1.720.13	m.1610	ENSDART00000024919.8	93.02	3e-08	61.9
on.mrna.LG1.720.2	m.1598	ENSDART00000024919.8	93.02	3e-08	61.9
on.mrna.LG1.720.3	m.1630	ENSDART00000024919.8	93.02	3e-08	61.9
on.mrna.LG1.720.4	m.1626	ENSDART00000024919.8	93.02	3e-08	61.9
on.mrna.LG1.720.5	m.1602	ENSDART00000024919.8	93.02	3e-08	61.9
on.mrna.LG1.720.6	m.1612	ENSDART00000024919.8	93.02	2e-08	61.9
on.mrna.LG1.720.7	m.1619	ENSDART00000024919.8	93.02	3e-08	61.9
on.mrna.LG1.720.8	m.1606	ENSDART00000024919.8	93.02	3e-08	61.9
on.mrna.LG1.720.9	m.1621	ENSDART00000024919.8	93.02	2e-08	61.9
on.mrna.LG1.722.1	m.4163	ENSDART00000168920.1	100	4.3	32.2
on.mrna.LG1.723.1	m.2289	ENSDART00000023301.8	80.07	3e-26	119
on.mrna.LG1.724.1	m.4793	ENSDART00000163274.1	84.1	2e-93	345
on.mrna.LG1.724.2	m.4780	ENSDART00000163274.1	85.71	5e-79	297
on.mrna.LG1.724.3	m.4787	ENSDART00000163274.1	84.3	6e-97	357
on.mrna.LG1.724.4	m.4774	ENSDART00000163274.1	84.1	2e-93	345
on.mrna.LG1.726.1	m.559	ENSDART00000168136.1	88.39	9e-40	165
on.mrna.LG1.727.1	m.1714	ENSDART00000131059.2	82.2	0	722
on.mrna.LG1.727.2	m.1712	ENSDART00000131059.2	81.85	1e-179	630
on.mrna.LG1.727.3	m.1716	ENSDART00000081335.6	82.15	4e-138	492
on.mrna.LG1.728.1	m.2000	ENSDART00000103449.4	82.33	1e-123	444
on.mrna.LG1.728.1	m.2001	ENSDART00000103449.4	82.33	1e-123	444
on.mrna.LG1.728.2	m.2005	ENSDART00000103449.4	82.41	1e-126	454
on.mrna.LG1.728.3	m.2007	ENSDART00000103449.4	82.41	1e-126	454
on.mrna.LG1.728.4	m.2003	ENSDART00000103449.4	82.41	1e-126	454
on.mrna.LG1.7280001.1	m.674	ENSDART00000011324.8	80.75	5e-16	85.7
on.mrna.LG1.729.1	m.2579	ENSDART00000099483.4	100	0.32	36.2
on.mrna.LG1.73.1	m.340	ENSDART00000015884.8	80.49	5e-43	176
on.mrna.LG1.730.1	m.3879	ENSDART00000113998.4	82.64	1e-49	198
on.mrna.LG1.730.2	m.3876	ENSDART00000113998.4	82.64	1e-49	198
on.mrna.LG1.731.1	m.4252	ENSDART00000157410.1	80.92	1e-14	81.8
on.mrna.LG1.731.2	m.4249	ENSDART00000169614.1	82.73	9e-16	85.7
on.mrna.LG1.731.3	m.4251	ENSDART00000157410.1	80.92	9e-15	81.8
on.mrna.LG1.732.1	m.2572	ENSDART00000169614.1	78.55	4e-25	117
on.mrna.LG1.733.1	m.1986	ENSDART00000157115.1	100	1.3	34.2
on.mrna.LG1.734.1	m.835	ENSDART00000170637.1	79.36	2e-12	75.8
on.mrna.LG1.734.2	m.830	ENSDART00000170637.1	90.91	9e-15	83.8
on.mrna.LG1.734.3	m.833	ENSDART00000170637.1	90.91	8e-15	83.8
on.mrna.LG1.735.1	m.965	ENSDART00000025057.7	100	0.076	38.2
on.mrna.LG1.737.1	m.551	ENSDART00000055292.5	100	0.12	38.2
on.mrna.LG1.7370001.1	m.2862	ENSDART00000170253.1	86.76	3e-09	63.9
on.mrna.LG1.738.1	m.5433	ENSDART00000113744.4	86.67	1e-10	69.9
on.mrna.LG1.739.1	m.5420	ENSDART00000052383.6	89.77	3e-21	103
on.mrna.LG1.7390002.1	m.5255	ENSDART00000067159.5	93.55	0.0003	46.1
on.mrna.LG1.74.1	m.5705	ENSDART00000008043.8	100	0.95	36.2
on.mrna.LG1.740.1	m.1377	ENSDART00000076469.4	81.01	3e-160	567
on.mrna.LG1.740.2	m.1378	ENSDART00000076469.4	81.01	2e-160	567
on.mrna.LG1.740.3	m.1379	ENSDART00000076469.4	81.01	3e-160	567
on.mrna.LG1.743.1	m.5549	ENSDART00000109579.3	95.83	0.023	40.1
on.mrna.LG1.743.2	m.5548	ENSDART00000109579.3	95.83	0.023	40.1
on.mrna.LG1.743.3	m.5547	ENSDART00000109579.3	95.83	0.023	40.1
on.mrna.LG1.744.1	m.3330	ENSDART00000159700.2	89.36	2e-06	54
on.mrna.LG1.744.2	m.3329	ENSDART00000159700.2	89.36	2e-06	54
on.mrna.LG1.745.1	m.5360	ENSDART00000044331.6	100	0.67	36.2
on.mrna.LG1.745.2	m.5363	ENSDART00000044331.6	100	0.61	36.2
on.mrna.LG1.745.3	m.5365	ENSDART00000044331.6	100	0.53	36.2
on.mrna.LG1.745.4	m.5361	ENSDART00000044331.6	100	0.53	36.2
on.mrna.LG1.745.5	m.5366	ENSDART00000044331.6	100	0.69	36.2
on.mrna.LG1.745.6	m.5364	ENSDART00000044331.6	100	0.61	36.2
on.mrna.LG1.746.1	m.2930	ENSDART00000163991.2	79.21	3e-10	67.9
on.mrna.LG1.747.1	m.2395	ENSDART00000167149.1	79.39	1e-49	200
on.mrna.LG1.7480001.1	m.5247	ENSDART00000166565.2	87.06	8e-15	81.8
on.mrna.LG1.749.1	m.1705	ENSDART00000049701.2	86.05	8e-13	75.8
on.mrna.LG1.75.1	m.2206	ENSDART00000167035.1	85.71	9e-46	184
on.mrna.LG1.75.2	m.2208	ENSDART00000167035.1	84.27	8e-30	131
on.mrna.LG1.75.3	m.2209	ENSDART00000167035.1	84.27	1e-29	131
on.mrna.LG1.75.4	m.2207	ENSDART00000167035.1	84.27	8e-30	131
on.mrna.LG1.75.5	m.2205	ENSDART00000167035.1	84.27	8e-30	131
on.mrna.LG1.752.1	m.174	ENSDART00000090743.5	80.5	2e-71	274
on.mrna.LG1.752.2	m.196	ENSDART00000090743.5	80.5	2e-71	274
on.mrna.LG1.752.3	m.182	ENSDART00000090743.5	80.5	2e-71	274
on.mrna.LG1.752.4	m.190	ENSDART00000090743.5	80.5	1e-71	274
on.mrna.LG1.753.1	m.1857	ENSDART00000097460.4	82.33	3e-27	125
on.mrna.LG1.753.2	m.1853	ENSDART00000097460.4	82.33	3e-27	125
on.mrna.LG1.7530001.1	m.214	ENSDART00000125230.2	100	0.14	38.2
on.mrna.LG1.76.1	m.1368	ENSDART00000063024.4	96.3	0.0005	46.1
on.mrna.LG1.76.2	m.1365	ENSDART00000063024.4	96.3	0.0005	46.1
on.mrna.LG1.76.3	m.1367	ENSDART00000063024.4	89.74	0.0003	46.1
on.mrna.LG1.76.4	m.1361	ENSDART00000063024.4	96.3	0.0005	46.1
on.mrna.LG1.76.5	m.1363	ENSDART00000063024.4	96.3	0.0005	46.1
on.mrna.LG1.77.1	m.3587	ENSDART00000166497.1	93.1	0.018	42.1
on.mrna.LG1.77.2	m.3585	ENSDART00000166497.1	93.1	0.018	42.1
on.mrna.LG1.77.3	m.3586	ENSDART00000166497.1	93.1	0.018	42.1
on.mrna.LG1.77.4	m.3588	ENSDART00000166497.1	93.1	0.018	42.1
on.mrna.LG1.78.1	m.6045	ENSDART00000129459.2	87.5	2e-06	56
on.mrna.LG1.78.2	m.6047	ENSDART00000129459.2	84.13	0.002	46.1
on.mrna.LG1.78.3	m.6041	ENSDART00000129459.2	87.5	2e-06	56
on.mrna.LG1.78.4	m.6043	ENSDART00000129459.2	87.5	2e-06	56
on.mrna.LG1.79.1	m.2856	ENSDART00000136189.1	79.18	2e-87	325
on.mrna.LG1.79.2	m.2854	ENSDART00000136189.1	79.18	2e-87	325
on.mrna.LG1.79.3	m.2849	ENSDART00000136189.1	79.18	2e-87	325
on.mrna.LG1.79.4	m.2851	ENSDART00000136189.1	79.18	2e-87	325
on.mrna.LG1.79.5	m.2847	ENSDART00000136189.1	79.18	2e-87	325
on.mrna.LG1.79.6	m.2852	ENSDART00000136189.1	79.18	2e-87	325
on.mrna.LG1.79.7	m.2858	ENSDART00000136189.1	79.18	2e-87	325
on.mrna.LG1.8.1	m.1970	ENSDART00000109635.2	80	2e-06	54
on.mrna.LG1.80.1	m.4554	ENSDART00000164709.2	100	0.39	36.2
on.mrna.LG1.80.2	m.4553	ENSDART00000082496.3	79.88	4e-09	63.9
on.mrna.LG1.80.3	m.4552	ENSDART00000082496.3	79.88	4e-09	63.9
on.mrna.LG1.81.1	m.3783	ENSDART00000148892.1	100	0.002	44.1
on.mrna.LG1.81.2	m.3782	ENSDART00000148892.1	100	0.002	44.1
on.mrna.LG1.82.1	m.4880	ENSDART00000006124.7	82.9	0	813
on.mrna.LG1.83.1	m.2841	ENSDART00000114005.3	96.55	0.0002	50.1
on.mrna.LG1.84.1	m.2895	ENSDART00000064439.5	100	4.6	34.2
on.mrna.LG1.84.2	m.2883	ENSDART00000058248.5	100	4.8	34.2
on.mrna.LG1.84.3	m.2890	ENSDART00000126239.2	100	0.098	40.1
on.mrna.LG1.84.4	m.2878	ENSDART00000126239.2	100	0.098	40.1
on.mrna.LG1.85.1	m.1670	ENSDART00000173057.1	81.4	1e-106	391
on.mrna.LG1.85.2	m.1679	ENSDART00000173057.1	81.4	1e-106	391
on.mrna.LG1.86.1	m.440	ENSDART00000172505.1	81.97	1e-10	67.9
on.mrna.LG1.86.2	m.438	ENSDART00000172505.1	81.97	1e-10	67.9
on.mrna.LG1.86.3	m.439	ENSDART00000172505.1	81.97	1e-10	67.9
on.mrna.LG1.87.2	m.5577	ENSDART00000032275.8	100	9.6	34.2
on.mrna.LG1.87.2	m.5578	ENSDART00000032275.8	100	9.6	34.2
on.mrna.LG1.88.1	m.4873	ENSDART00000082504.6	88	6e-61	236
on.mrna.LG1.88.2	m.4876	ENSDART00000082504.6	88	7e-61	236
on.mrna.LG1.89.1	m.3911	ENSDART00000021462.5	84.29	8e-06	52
on.mrna.LG1.9.1	m.4407	ENSDART00000109872.2	80.77	2e-47	190
on.mrna.LG1.90.1	m.3679	ENSDART00000049171.6	80.16	3e-145	517
on.mrna.LG1.90.2	m.3681	ENSDART00000049171.6	80.16	3e-145	517
on.mrna.LG1.90.3	m.3686	ENSDART00000049171.6	80.16	3e-145	517
on.mrna.LG1.90.4	m.3688	ENSDART00000049171.6	80.16	3e-145	517
on.mrna.LG1.90.5	m.3683	ENSDART00000049171.6	80.16	3e-145	517
on.mrna.LG1.91.1	m.1931	ENSDART00000129387.2	79.98	4e-93	345
on.mrna.LG1.91.1	m.1932	ENSDART00000149158.2	80.58	0	763
on.mrna.LG1.91.2	m.1911	ENSDART00000129387.2	79.98	4e-93	345
on.mrna.LG1.91.2	m.1912	ENSDART00000129387.2	79.8	0	680
on.mrna.LG1.91.3	m.1921	ENSDART00000129387.2	79.98	4e-93	345
on.mrna.LG1.91.3	m.1922	ENSDART00000129387.2	79.8	0	680
on.mrna.LG1.91.4	m.1941	ENSDART00000129387.2	79.98	4e-93	345
on.mrna.LG1.91.4	m.1942	ENSDART00000149158.2	80.58	0	763
on.mrna.LG1.92.1	m.2500	ENSDART00000087960.5	81.82	3e-11	71.9
on.mrna.LG1.93.1	m.1371	ENSDART00000098308.3	100	0.35	38.2
on.mrna.LG1.94.1	m.2203	ENSDART00000125116.1	81.51	1e-72	274
on.mrna.LG1.96.1	m.5912	ENSDART00000122930.2	82.56	2e-36	155
on.mrna.LG1.96.2	m.5914	ENSDART00000122930.2	82.56	2e-36	155
on.mrna.LG1.97.1	m.3517	ENSDART00000127955.3	82.59	8e-31	135
on.mrna.LG1.98.1	m.4158	ENSDART00000012164.9	79.71	2e-36	155
on.mrna.LG1.98.2	m.4153	ENSDART00000012164.9	79.71	2e-36	155
on.mrna.LG1.98.3	m.4160	ENSDART00000012164.9	79.72	6e-39	163
on.mrna.LG1.98.4	m.4150	ENSDART00000012164.9	79.72	5e-39	163
on.mrna.LG1.98.5	m.4144	ENSDART00000012164.9	79.71	1e-36	155
on.mrna.LG1.98.6	m.4147	ENSDART00000012164.9	79.71	1e-36	155
on.mrna.LG1.98.7	m.4155	ENSDART00000012164.9	79.72	4e-39	163
on.mrna.LG1.99.1	m.2054	ENSDART00000077694.3	80.56	5e-127	456
on.mrna.LG1.99.2	m.2051	ENSDART00000077694.3	81.18	3e-125	450
on.mrna.LG1.99.3	m.2047	ENSDART00000077694.3	81.21	3e-85	317
on.mrna.LG10.100.1	m.9570	ENSDART00000153909.2	78.88	8e-121	436
on.mrna.LG10.101.1	m.9167	ENSDART00000078018.4	81.07	0	664
on.mrna.LG10.101.2	m.9160	ENSDART00000078018.4	81.08	0	652
on.mrna.LG10.101.3	m.9164	ENSDART00000078018.4	81.07	0	664
on.mrna.LG10.102.1	m.8749	ENSDART00000098239.4	80.61	2e-104	381
on.mrna.LG10.102.2	m.8747	ENSDART00000098239.4	80.61	2e-104	381
on.mrna.LG10.102.3	m.8750	ENSDART00000098239.4	80.61	2e-104	381
on.mrna.LG10.102.4	m.8748	ENSDART00000098239.4	80.61	2e-104	381
on.mrna.LG10.103.1	m.8241	ENSDART00000016758.7	80.55	7e-86	319
on.mrna.LG10.103.2	m.8237	ENSDART00000016758.7	80.55	7e-86	319
on.mrna.LG10.103.3	m.8245	ENSDART00000016758.7	80.55	5e-86	319
on.mrna.LG10.103.4	m.8243	ENSDART00000016758.7	80.55	5e-86	319
on.mrna.LG10.103.5	m.8239	ENSDART00000016758.7	80.55	5e-86	319
on.mrna.LG10.104.1	m.7572	ENSDART00000012888.6	83.56	2e-05	50.1
on.mrna.LG10.105.1	m.7528	ENSDART00000056544.6	100	0.26	38.2
on.mrna.LG10.105.2	m.7524	ENSDART00000039312.7	100	0.022	42.1
on.mrna.LG10.105.3	m.7534	ENSDART00000056544.6	100	0.29	38.2
on.mrna.LG10.106.1	m.6578	ENSDART00000063849.4	84.51	0	3642
on.mrna.LG10.106.2	m.6580	ENSDART00000063849.4	84.44	0	3481
on.mrna.LG10.107.1	m.10038	ENSDART00000142016.1	79	2e-09	63.9
on.mrna.LG10.107.2	m.10039	ENSDART00000142016.1	79	2e-09	63.9
on.mrna.LG10.108.1	m.9498	ENSDART00000018461.9	79.53	5e-31	137
on.mrna.LG10.11.1	m.8663	ENSDART00000010092.6	100	2.4	34.2
on.mrna.LG10.110.1	m.9942	ENSDART00000081059.4	81.49	4e-154	545
on.mrna.LG10.110.2	m.9945	ENSDART00000081059.4	81.38	8e-162	571
on.mrna.LG10.110.3	m.9938	ENSDART00000081059.4	81.38	1e-161	571
on.mrna.LG10.110.4	m.9941	ENSDART00000081059.4	81.38	9e-162	571
on.mrna.LG10.110.5	m.9946	ENSDART00000081059.4	81.38	1e-161	571
on.mrna.LG10.110.6	m.9943	ENSDART00000081059.4	81.13	2e-150	533
on.mrna.LG10.110.7	m.9940	ENSDART00000081059.4	81.84	2e-112	406
[truncated: 48,457 more rows]

## Sheet: Gp_Drerio
Onil_transcripID	denovo_trancriptID_QUERY	Drerio_transcriptID_SUBJECT	percentID	eval	bit_score
on.mrna.LG1.1.1	m.3121	ENSDART00000008785.8	82.57	3e-77	289
on.mrna.LG1.1.2	m.3123	ENSDART00000008785.8	84.52	6e-64	244
on.mrna.LG1.10.1	m.3099	ENSDART00000163134.1	79.18	3e-38	161
on.mrna.LG1.100.1	m.205	ENSDART00000029549.8	79.49	8e-108	392
on.mrna.LG1.100.2	m.211	ENSDART00000029549.8	79.49	8e-108	392
on.mrna.LG1.100.3	m.202	ENSDART00000029549.8	79.49	8e-108	392
on.mrna.LG1.100.4	m.208	ENSDART00000029549.8	79.49	8e-108	392
on.mrna.LG1.101.1	m.3353	ENSDART00000161897.1	100	0.51	38.2
on.mrna.LG1.102.1	m.2796	ENSDART00000151550.1	84.39	3e-28	129
on.mrna.LG1.102.2	m.2791	ENSDART00000151550.1	84.39	3e-28	129
on.mrna.LG1.102.3	m.2801	ENSDART00000151550.1	84.39	3e-28	129
on.mrna.LG1.102.4	m.2786	ENSDART00000151550.1	84.39	3e-28	129
on.mrna.LG1.103.1	m.4313	ENSDART00000149321.1	80.85	1e-11	71.9
on.mrna.LG1.104.1	m.3655	ENSDART00000121864.2	88.1	5e-16	87.7
on.mrna.LG1.105.1	m.214	ENSDART00000052641.5	79.09	1e-92	341
on.mrna.LG1.106.1	m.5222	ENSDART00000129125.2	79.47	6e-91	337
on.mrna.LG1.107.1	m.2717	ENSDART00000047471.7	100	4	32.2
on.mrna.LG1.108.1	m.2133	ENSDART00000156527.1	100	0.008	42.1
on.mrna.LG1.108.2	m.2112	ENSDART00000156527.1	100	0.008	42.1
on.mrna.LG1.108.3	m.2121	ENSDART00000156527.1	100	0.008	42.1
on.mrna.LG1.108.4	m.2115	ENSDART00000156527.1	100	0.007	42.1
on.mrna.LG1.108.5	m.2127	ENSDART00000156527.1	100	0.007	42.1
on.mrna.LG1.108.6	m.2118	ENSDART00000156527.1	100	0.025	42.1
on.mrna.LG1.108.7	m.2124	ENSDART00000156527.1	100	0.025	42.1
on.mrna.LG1.108.8	m.2130	ENSDART00000156527.1	100	0.025	42.1
on.mrna.LG1.109.1	m.3651	ENSDART00000159781.1	81.72	9e-05	50.1
on.mrna.LG1.109.2	m.3643	ENSDART00000159781.1	81.72	0.0001	50.1
on.mrna.LG1.109.3	m.3649	ENSDART00000159781.1	95.83	1e-13	79.8
on.mrna.LG1.109.4	m.3645	ENSDART00000159781.1	95.83	2e-13	79.8
on.mrna.LG1.109.5	m.3647	ENSDART00000159781.1	95.83	9e-14	79.8
on.mrna.LG1.109.6	m.3653	ENSDART00000159781.1	95.83	7e-14	79.8
on.mrna.LG1.11.1	m.3721	ENSDART00000169830.1	81.66	8e-61	236
on.mrna.LG1.11.2	m.3719	ENSDART00000169830.1	81.57	1e-53	212
on.mrna.LG1.110.1	m.3659	ENSDART00000102553.4	85.95	1e-21	105
on.mrna.LG1.110.2	m.3658	ENSDART00000102553.4	85.95	1e-21	105
on.mrna.LG1.110.3	m.3661	ENSDART00000102553.4	85.95	1e-21	105
on.mrna.LG1.110.4	m.3660	ENSDART00000102553.4	85.95	1e-21	105
on.mrna.LG1.111.1	m.2836	ENSDART00000159480.1	85.71	1e-09	65.9
on.mrna.LG1.111.2	m.2841	ENSDART00000159480.1	79.58	9e-14	79.8
on.mrna.LG1.111.3	m.2833	ENSDART00000159480.1	79.58	9e-14	79.8
on.mrna.LG1.111.4	m.2838	ENSDART00000159480.1	79.58	9e-14	79.8
on.mrna.LG1.111.5	m.2831	ENSDART00000159480.1	79.58	9e-14	79.8
on.mrna.LG1.112.1	m.3038	ENSDART00000109970.3	100	0.057	40.1
on.mrna.LG1.112.2	m.3044	ENSDART00000109970.3	100	0.061	40.1
on.mrna.LG1.112.3	m.3035	ENSDART00000109970.3	100	0.057	40.1
on.mrna.LG1.112.4	m.3041	ENSDART00000109970.3	100	0.061	40.1
on.mrna.LG1.113.1	m.1794	ENSDART00000081319.5	85.47	5e-19	97.6
on.mrna.LG1.113.2	m.1798	ENSDART00000081319.5	85.47	5e-19	97.6
on.mrna.LG1.113.3	m.1787	ENSDART00000081319.5	85.47	5e-19	97.6
on.mrna.LG1.113.4	m.1802	ENSDART00000081319.5	85.47	4e-19	97.6
on.mrna.LG1.113.5	m.1784	ENSDART00000081319.5	85.47	4e-19	97.6
on.mrna.LG1.113.6	m.1791	ENSDART00000081319.5	85.47	3e-19	97.6
on.mrna.LG1.114.1	m.2308	ENSDART00000168352.1	89.96	1e-75	283
on.mrna.LG1.115.1	m.832	ENSDART00000003475.5	80.37	0.001	46.1
on.mrna.LG1.116.1	m.1756	ENSDART00000036050.7	81.89	6e-72	272
on.mrna.LG1.116.2	m.1755	ENSDART00000036050.7	81.89	6e-72	272
on.mrna.LG1.116.3	m.1757	ENSDART00000036050.7	81.89	6e-72	272
on.mrna.LG1.117.1	m.4768	ENSDART00000010026.7	82.47	4e-36	155
on.mrna.LG1.117.2	m.4772	ENSDART00000010026.7	82.47	4e-36	155
on.mrna.LG1.117.3	m.4776	ENSDART00000010026.7	81.4	1e-17	93.7
on.mrna.LG1.118.1	m.3988	ENSDART00000165019.1	88.21	3e-51	204
on.mrna.LG1.118.2	m.3985	ENSDART00000165019.1	88.21	3e-51	204
on.mrna.LG1.119.1	m.3077	ENSDART00000109567.3	85.23	5e-11	71.9
on.mrna.LG1.119.2	m.3076	ENSDART00000109567.3	85.23	4e-11	71.9
on.mrna.LG1.119.3	m.3073	ENSDART00000109567.3	85.23	5e-11	71.9
on.mrna.LG1.12.1	m.4452	ENSDART00000164643.1	81.82	7e-91	337
on.mrna.LG1.12.2	m.4455	ENSDART00000164643.1	81.82	7e-91	337
on.mrna.LG1.12.3	m.4458	ENSDART00000164643.1	81.82	9e-91	337
on.mrna.LG1.120.1	m.5305	ENSDART00000040308.6	95.45	0.28	36.2
on.mrna.LG1.121.1	m.2094	ENSDART00000161160.1	81.13	3e-13	77.8
on.mrna.LG1.1210001.1	m.3683	ENSDART00000003712.7	78.99	2e-40	168
on.mrna.LG1.122.1	m.3759	ENSDART00000102430.4	100	0.19	38.2
on.mrna.LG1.122.2	m.3757	ENSDART00000140476.1	100	0.015	42.1
on.mrna.LG1.123.1	m.5337	ENSDART00000065132.4	100	0.019	42.1
on.mrna.LG1.123.2	m.5341	ENSDART00000065132.4	100	0.021	42.1
on.mrna.LG1.123.3	m.5339	ENSDART00000079175.5	80.14	4e-07	58
on.mrna.LG1.123.4	m.5335	ENSDART00000079175.5	80.14	5e-07	58
on.mrna.LG1.124.1	m.4612	ENSDART00000145251.1	87.27	3e-06	54
on.mrna.LG1.124.2	m.4611	ENSDART00000145251.1	87.27	4e-06	54
on.mrna.LG1.124.3	m.4613	ENSDART00000145251.1	87.27	3e-06	54
on.mrna.LG1.124.4	m.4614	ENSDART00000145251.1	87.27	3e-06	54
on.mrna.LG1.126.1	m.1449	ENSDART00000168609.1	90	0.0003	50.1
on.mrna.LG1.127.1	m.3026	ENSDART00000026434.7	100	0.051	40.1
on.mrna.LG1.127.10	m.3027	ENSDART00000026434.7	100	0.042	40.1
on.mrna.LG1.127.11	m.3030	ENSDART00000026434.7	100	0.027	40.1
on.mrna.LG1.127.12	m.3024	ENSDART00000026434.7	100	0.037	40.1
on.mrna.LG1.127.13	m.3021	ENSDART00000026434.7	100	0.027	40.1
on.mrna.LG1.127.2	m.3029	ENSDART00000026434.7	100	0.042	40.1
on.mrna.LG1.127.3	m.3025	ENSDART00000026434.7	100	0.046	40.1
on.mrna.LG1.127.4	m.3031	ENSDART00000026434.7	100	0.036	40.1
on.mrna.LG1.127.5	m.3028	ENSDART00000026434.7	100	0.049	40.1
on.mrna.LG1.127.6	m.3023	ENSDART00000026434.7	100	0.036	40.1
on.mrna.LG1.127.7	m.3032	ENSDART00000026434.7	100	0.034	40.1
on.mrna.LG1.127.8	m.3020	ENSDART00000026434.7	100	0.044	40.1
on.mrna.LG1.127.9	m.3022	ENSDART00000026434.7	100	0.034	40.1
on.mrna.LG1.128.1	m.3662	ENSDART00000168428.1	85.94	2e-06	56
on.mrna.LG1.128.2	m.3664	ENSDART00000168428.1	85.94	1e-06	56
on.mrna.LG1.129.1	m.2476	ENSDART00000168091.1	80.84	8e-73	276
on.mrna.LG1.13.1	m.5134	ENSDART00000010322.8	86.49	2e-10	67.9
on.mrna.LG1.13.2	m.5133	ENSDART00000010322.8	86.49	2e-10	67.9
on.mrna.LG1.130.1	m.1872	ENSDART00000025057.7	100	0.57	36.2
on.mrna.LG1.132.1	m.290	ENSDART00000082153.5	100	0.046	42.1
on.mrna.LG1.132.2	m.292	ENSDART00000082153.5	100	0.041	42.1
on.mrna.LG1.1320001.1	m.2712	ENSDART00000054925.6	83.52	4e-26	119
on.mrna.LG1.133.1	m.448	ENSDART00000055047.6	81.82	4e-24	113
on.mrna.LG1.133.2	m.449	ENSDART00000055047.6	81.82	4e-24	113
on.mrna.LG1.135.1	m.5253	ENSDART00000022307.9	78.94	3e-100	367
on.mrna.LG1.135.2	m.5251	ENSDART00000022307.9	79.55	3e-66	254
on.mrna.LG1.135.3	m.5255	ENSDART00000022307.9	78.94	2e-100	367
on.mrna.LG1.136.1	m.4269	ENSDART00000010521.7	82.25	1e-47	194
on.mrna.LG1.136.2	m.4285	ENSDART00000010521.7	82.25	1e-47	194
on.mrna.LG1.136.3	m.4263	ENSDART00000010521.7	82.25	1e-47	194
on.mrna.LG1.136.4	m.4291	ENSDART00000010521.7	82.25	1e-47	194
on.mrna.LG1.136.5	m.4277	ENSDART00000010521.7	82.25	1e-47	194
on.mrna.LG1.137.1	m.1859	ENSDART00000091901.5	84.62	9e-95	347
on.mrna.LG1.137.2	m.1858	ENSDART00000091901.5	84.5	2e-136	486
on.mrna.LG1.137.3	m.1860	ENSDART00000091901.5	84.46	0	686
on.mrna.LG1.137.4	m.1856	ENSDART00000091901.5	84.67	0	640
on.mrna.LG1.138.1	m.3618	ENSDART00000169908.1	79.02	5e-27	123
on.mrna.LG1.138.2	m.3617	ENSDART00000169908.1	79.02	5e-27	123
on.mrna.LG1.139.1	m.1654	ENSDART00000065933.5	82.02	2e-19	99.6
on.mrna.LG1.139.2	m.1657	ENSDART00000065933.5	82.02	2e-19	99.6
on.mrna.LG1.14.1	m.4032	ENSDART00000039810.6	84.09	2e-123	446
on.mrna.LG1.140.1	m.2961	ENSDART00000111091.3	91.67	1e-08	63.9
on.mrna.LG1.140.2	m.2982	ENSDART00000111091.3	91.67	2e-08	63.9
on.mrna.LG1.140.3	m.2988	ENSDART00000111091.3	91.67	1e-08	63.9
on.mrna.LG1.140.4	m.2976	ENSDART00000111091.3	91.67	2e-08	63.9
on.mrna.LG1.140.5	m.2970	ENSDART00000111091.3	91.67	2e-08	63.9
on.mrna.LG1.140.6	m.2965	ENSDART00000111091.3	91.67	1e-08	63.9
on.mrna.LG1.141.1	m.4672	ENSDART00000033528.7	100	0.44	38.2
on.mrna.LG1.142.1	m.3765	ENSDART00000026135.8	93.1	0.039	42.1
on.mrna.LG1.142.2	m.3762	ENSDART00000026135.8	93.1	0.039	42.1
on.mrna.LG1.142.3	m.3763	ENSDART00000026135.8	93.1	0.023	42.1
on.mrna.LG1.142.4	m.3761	ENSDART00000026135.8	93.1	0.032	42.1
on.mrna.LG1.142.5	m.3764	ENSDART00000026135.8	93.1	0.026	42.1
on.mrna.LG1.143.1	m.667	ENSDART00000126243.2	77.6	2e-15	85.7
on.mrna.LG1.143.10	m.604	ENSDART00000150989.2	81.94	2e-13	79.8
on.mrna.LG1.143.11	m.652	ENSDART00000126243.2	80.24	2e-10	69.9
on.mrna.LG1.143.12	m.724	ENSDART00000126243.2	80.24	1e-10	69.9
on.mrna.LG1.143.13	m.613	ENSDART00000126243.2	80.24	1e-10	69.9
on.mrna.LG1.143.14	m.679	ENSDART00000150989.2	81.94	1e-13	79.8
on.mrna.LG1.143.15	m.718	ENSDART00000110069.3	96.55	0.0001	50.1
on.mrna.LG1.143.16	m.646	ENSDART00000126243.2	80.24	1e-10	69.9
on.mrna.LG1.143.17	m.706	ENSDART00000110069.3	96.55	0.0001	50.1
on.mrna.LG1.143.18	m.703	ENSDART00000126243.2	80.24	2e-10	69.9
on.mrna.LG1.143.19	m.640	ENSDART00000126243.2	80.24	1e-10	69.9
on.mrna.LG1.143.2	m.697	ENSDART00000126243.2	77.6	2e-15	85.7
on.mrna.LG1.143.20	m.664	ENSDART00000110069.3	96.55	0.0001	50.1
on.mrna.LG1.143.21	m.625	ENSDART00000126243.2	80.24	1e-10	69.9
on.mrna.LG1.143.22	m.685	ENSDART00000110069.3	96.55	0.0001	50.1
on.mrna.LG1.143.23	m.610	ENSDART00000126243.2	80.24	1e-10	69.9
on.mrna.LG1.143.24	m.598	ENSDART00000110069.3	96.55	8e-05	50.1
on.mrna.LG1.143.25	m.673	ENSDART00000110069.3	96.55	8e-05	50.1
on.mrna.LG1.143.26	m.622	ENSDART00000110069.3	96.55	8e-05	50.1
on.mrna.LG1.143.27	m.691	ENSDART00000110069.3	96.55	8e-05	50.1
on.mrna.LG1.143.28	m.700	ENSDART00000126243.2	77.6	2e-15	85.7
on.mrna.LG1.143.29	m.688	ENSDART00000126243.2	81.69	2e-12	75.8
on.mrna.LG1.143.3	m.670	ENSDART00000126243.2	77.6	2e-15	85.7
on.mrna.LG1.143.30	m.631	ENSDART00000126243.2	77.6	2e-15	85.7
on.mrna.LG1.143.31	m.655	ENSDART00000150989.2	77.7	1e-16	89.7
on.mrna.LG1.143.32	m.727	ENSDART00000126243.2	80.24	1e-10	69.9
on.mrna.LG1.143.33	m.736	ENSDART00000126243.2	81.69	2e-12	75.8
on.mrna.LG1.143.34	m.658	ENSDART00000150989.2	81.94	1e-13	79.8
on.mrna.LG1.143.35	m.634	ENSDART00000150989.2	77.7	1e-16	89.7
on.mrna.LG1.143.36	m.694	ENSDART00000126243.2	80.24	1e-10	69.9
on.mrna.LG1.143.37	m.619	ENSDART00000126243.2	80.24	1e-10	69.9
on.mrna.LG1.143.38	m.715	ENSDART00000126243.2	80.24	1e-10	69.9
on.mrna.LG1.143.39	m.601	ENSDART00000150989.2	81.94	1e-13	79.8
on.mrna.LG1.143.4	m.676	ENSDART00000126243.2	81.69	2e-12	75.8
on.mrna.LG1.143.40	m.637	ENSDART00000110069.3	96.55	8e-05	50.1
on.mrna.LG1.143.41	m.661	ENSDART00000126243.2	80.24	1e-10	69.9
on.mrna.LG1.143.42	m.733	ENSDART00000110069.3	96.55	8e-05	50.1
on.mrna.LG1.143.43	m.643	ENSDART00000126243.2	80.24	1e-10	69.9
on.mrna.LG1.143.44	m.649	ENSDART00000126243.2	80.24	1e-10	69.9
on.mrna.LG1.143.45	m.730	ENSDART00000110069.3	96.55	8e-05	50.1
on.mrna.LG1.143.46	m.709	ENSDART00000110069.3	96.55	8e-05	50.1
on.mrna.LG1.143.47	m.592	ENSDART00000110069.3	96.55	8e-05	50.1
on.mrna.LG1.143.48	m.682	ENSDART00000126243.2	80.24	1e-10	69.9
on.mrna.LG1.143.49	m.616	ENSDART00000110069.3	96.55	8e-05	50.1
on.mrna.LG1.143.5	m.607	ENSDART00000150989.2	77.7	2e-16	89.7
on.mrna.LG1.143.50	m.628	ENSDART00000110069.3	96.55	8e-05	50.1
on.mrna.LG1.143.51	m.739	ENSDART00000110069.3	96.55	8e-05	50.1
on.mrna.LG1.143.6	m.595	ENSDART00000126243.2	77.6	2e-15	85.7
on.mrna.LG1.143.7	m.712	ENSDART00000126243.2	80.24	1e-10	69.9
on.mrna.LG1.143.8	m.742	ENSDART00000126243.2	81.69	2e-12	75.8
on.mrna.LG1.143.9	m.721	ENSDART00000150989.2	77.7	1e-16	89.7
on.mrna.LG1.144.1	m.5626	ENSDART00000109552.2	83.21	2e-95	353
on.mrna.LG1.144.2	m.5602	ENSDART00000109552.2	83.21	2e-95	353
on.mrna.LG1.144.3	m.5618	ENSDART00000109552.2	83.62	2e-83	313
on.mrna.LG1.144.4	m.5642	ENSDART00000109552.2	83.41	7e-80	301
on.mrna.LG1.144.5	m.5634	ENSDART00000109552.2	83.89	5e-59	232
on.mrna.LG1.144.6	m.5610	ENSDART00000109552.2	83.21	2e-95	353
on.mrna.LG1.145.1	m.2027	ENSDART00000121431.1	79.3	3e-29	131
on.mrna.LG1.145.2	m.2026	ENSDART00000121431.1	79.3	3e-29	131
on.mrna.LG1.146.1	m.2658	ENSDART00000109344.3	81.17	2e-24	117
on.mrna.LG1.146.2	m.2642	ENSDART00000109344.3	81.17	2e-24	117
on.mrna.LG1.146.3	m.2651	ENSDART00000114222.3	82.14	2e-23	113
on.mrna.LG1.1460001.1	m.860	ENSDART00000109344.3	92.59	0.091	38.2
on.mrna.LG1.147.1	m.82	ENSDART00000102118.4	80.83	2e-50	200
on.mrna.LG1.147.2	m.83	ENSDART00000077744.4	80.83	2e-47	190
on.mrna.LG1.148.1	m.1212	ENSDART00000037986.7	86.36	0.057	40.1
on.mrna.LG1.148.2	m.1215	ENSDART00000037986.7	85.11	0.17	38.2
on.mrna.LG1.148.3	m.1211	ENSDART00000162181.1	100	0.51	36.2
on.mrna.LG1.148.4	m.1214	ENSDART00000162181.1	100	0.51	36.2
on.mrna.LG1.149.1	m.341	ENSDART00000013066.7	83.44	0	930
on.mrna.LG1.149.2	m.342	ENSDART00000013066.7	83.32	0	878
on.mrna.LG1.15.1	m.2311	ENSDART00000122929.3	77.34	4e-53	210
on.mrna.LG1.15.2	m.2327	ENSDART00000122929.3	77.42	2e-55	218
on.mrna.LG1.15.3	m.2319	ENSDART00000092919.4	77.62	2e-51	204
on.mrna.LG1.15.4	m.2321	ENSDART00000122929.3	77.34	4e-53	210
on.mrna.LG1.15.5	m.2325	ENSDART00000122929.3	77.42	2e-55	218
on.mrna.LG1.15.6	m.2317	ENSDART00000122929.3	77.34	4e-53	210
on.mrna.LG1.15.7	m.2315	ENSDART00000122929.3	77.34	4e-53	210
on.mrna.LG1.15.8	m.2313	ENSDART00000122929.3	77.5	9e-51	202
on.mrna.LG1.15.9	m.2323	ENSDART00000122929.3	79.06	2e-45	184
on.mrna.LG1.150.1	m.4963	ENSDART00000144335.1	79.3	4e-13	77.8
on.mrna.LG1.150.2	m.4962	ENSDART00000144335.1	79.3	3e-13	77.8
on.mrna.LG1.151.1	m.2626	ENSDART00000168973.1	83.54	6e-23	111
on.mrna.LG1.152.1	m.3547	ENSDART00000046349.6	100	1	34.2
on.mrna.LG1.154.1	m.263	ENSDART00000122042.2	83.06	1e-13	79.8
on.mrna.LG1.155.1	m.5165	ENSDART00000025031.9	86.35	2e-69	264
on.mrna.LG1.1550001.1	m.5059	ENSDART00000092290.4	79.94	7e-152	539
on.mrna.LG1.1550002.1	m.3783	ENSDART00000092290.4	79.94	9e-152	539
on.mrna.LG1.157.1	m.5272	ENSDART00000162472.1	100	0.99	34.2
on.mrna.LG1.1580001.1	m.438	ENSDART00000052912.6	79.4	6e-35	151
on.mrna.LG1.159.1	m.3272	ENSDART00000028955.4	79.18	4e-26	121
on.mrna.LG1.159.2	m.3268	ENSDART00000028955.4	87.32	9e-11	69.9
on.mrna.LG1.159.3	m.3270	ENSDART00000028955.4	86.36	1e-19	99.6
on.mrna.LG1.16.1	m.2811	ENSDART00000158160.1	82.53	4e-74	281
on.mrna.LG1.160.1	m.1641	ENSDART00000139900.3	88.7	3e-27	125
on.mrna.LG1.161.1	m.4570	ENSDART00000139900.3	83.64	7e-13	75.8
on.mrna.LG1.164.1	m.2345	ENSDART00000155592.2	83	2e-115	418
on.mrna.LG1.165.1	m.2864	ENSDART00000111412.3	90.62	0.15	40.1
on.mrna.LG1.166.1	m.855	ENSDART00000033980.6	85.04	0	714
on.mrna.LG1.166.2	m.845	ENSDART00000033980.6	84.96	3e-129	462
on.mrna.LG1.166.3	m.841	ENSDART00000033980.6	84.96	3e-129	462
on.mrna.LG1.166.4	m.857	ENSDART00000033980.6	84.96	3e-129	462
on.mrna.LG1.166.5	m.849	ENSDART00000033980.6	84.96	3e-129	462
on.mrna.LG1.166.6	m.851	ENSDART00000160139.1	83.67	8e-174	611
on.mrna.LG1.166.7	m.853	ENSDART00000160139.1	83.67	8e-174	611
on.mrna.LG1.166.8	m.847	ENSDART00000033980.6	84.76	1e-150	533
on.mrna.LG1.166.9	m.843	ENSDART00000033980.6	84.39	4e-75	281
on.mrna.LG1.1660001.1	m.4686	ENSDART00000168416.1	82.64	7e-178	624
on.mrna.LG1.167.1	m.4556	ENSDART00000087797.4	80	2e-19	99.6
on.mrna.LG1.168.1	m.5029	ENSDART00000160843.1	79.45	6e-145	515
on.mrna.LG1.168.2	m.5035	ENSDART00000160843.1	79.81	0	672
on.mrna.LG1.168.3	m.5025	ENSDART00000160843.1	79.61	7e-157	555
on.mrna.LG1.168.4	m.5031	ENSDART00000160843.1	79.81	0	672
on.mrna.LG1.169.1	m.4953	ENSDART00000124242.3	90.91	0.017	42.1
on.mrna.LG1.169.2	m.4952	ENSDART00000101664.4	92.59	0.19	38.2
on.mrna.LG1.17.1	m.276	ENSDART00000160072.1	77.66	4e-38	161
on.mrna.LG1.17.2	m.283	ENSDART00000160072.1	77.66	4e-38	161
on.mrna.LG1.17.3	m.287	ENSDART00000160072.1	77.7	3e-35	151
on.mrna.LG1.17.4	m.273	ENSDART00000160072.1	77.66	3e-38	161
on.mrna.LG1.17.5	m.280	ENSDART00000160072.1	77.66	3e-38	161
on.mrna.LG1.170.1	m.4641	ENSDART00000164081.1	78.74	6e-27	123
on.mrna.LG1.171.1	m.3391	ENSDART00000060968.6	81.58	2e-31	139
on.mrna.LG1.171.1	m.3392	ENSDART00000168668.1	100	0.7	36.2
on.mrna.LG1.172.1	m.5084	ENSDART00000059861.6	81.61	5e-94	345
on.mrna.LG1.172.2	m.5085	ENSDART00000059861.6	81.23	9e-99	361
on.mrna.LG1.172.3	m.5086	ENSDART00000059861.6	80.34	3e-58	226
on.mrna.LG1.173.1	m.2176	ENSDART00000109529.3	80.24	3e-59	230
on.mrna.LG1.173.10	m.2168	ENSDART00000109529.3	80.24	3e-59	230
on.mrna.LG1.173.11	m.2164	ENSDART00000109529.3	80.61	1e-75	285
on.mrna.LG1.173.2	m.2172	ENSDART00000109529.3	80.61	7e-76	285
on.mrna.LG1.173.3	m.2178	ENSDART00000109529.3	80.61	1e-75	285
on.mrna.LG1.173.4	m.2170	ENSDART00000109529.3	80.61	1e-75	285
on.mrna.LG1.173.5	m.2166	ENSDART00000109529.3	80.61	9e-76	285
on.mrna.LG1.173.6	m.2184	ENSDART00000109529.3	80.61	8e-76	285
on.mrna.LG1.173.6	m.2186	ENSDART00000109529.3	88.89	2e-17	89.7
on.mrna.LG1.173.7	m.2182	ENSDART00000109529.3	80.61	1e-75	285
on.mrna.LG1.173.8	m.2174	ENSDART00000109529.3	80.61	1e-75	285
on.mrna.LG1.173.9	m.2180	ENSDART00000109529.3	80.61	1e-75	285
on.mrna.LG1.174.1	m.3942	ENSDART00000004984.11	95.45	0.75	36.2
on.mrna.LG1.175.1	m.480	ENSDART00000081743.5	89.63	4e-47	190
on.mrna.LG1.176.1	m.387	ENSDART00000109615.4	95.65	0.3	38.2
on.mrna.LG1.176.2	m.392	ENSDART00000109615.4	95.65	0.3	38.2
on.mrna.LG1.177.1	m.956	ENSDART00000010092.6	80.78	4e-60	234
on.mrna.LG1.178.1	m.820	ENSDART00000098627.4	83.33	3e-48	194
on.mrna.LG1.179.1	m.5273	ENSDART00000092524.5	80.58	0	765
on.mrna.LG1.179.2	m.5274	ENSDART00000092524.5	81.4	0	1269
on.mrna.LG1.18.1	m.935	ENSDART00000165875.1	83.02	0	739
on.mrna.LG1.180.1	m.1929	ENSDART00000112730.3	80.07	2e-174	615
on.mrna.LG1.180.2	m.1932	ENSDART00000112730.3	80.07	2e-174	615
on.mrna.LG1.180.3	m.1938	ENSDART00000112730.3	80.07	2e-174	615
on.mrna.LG1.180.4	m.1935	ENSDART00000112730.3	80.07	2e-174	615
on.mrna.LG1.181.1	m.4764	ENSDART00000114831.3	80.53	6e-05	50.1
on.mrna.LG1.182.1	m.1004	ENSDART00000114831.3	81	0.0001	48.1
on.mrna.LG1.182.2	m.1006	ENSDART00000114831.3	81	0.0002	48.1
on.mrna.LG1.183.1	m.3434	ENSDART00000152684.2	89.23	3e-12	73.8
on.mrna.LG1.184.1	m.5308	ENSDART00000031635.5	81.75	7e-32	141
on.mrna.LG1.184.2	m.5317	ENSDART00000031635.5	81.75	6e-32	141
on.mrna.LG1.184.3	m.5322	ENSDART00000144406.2	88.18	3e-24	115
on.mrna.LG1.184.4	m.5313	ENSDART00000144406.2	88.18	3e-24	115
on.mrna.LG1.185.1	m.3865	ENSDART00000108579.4	81.08	4e-65	250
on.mrna.LG1.186.1	m.3495	ENSDART00000144606.2	97.44	9e-11	69.9
on.mrna.LG1.187.1	m.339	ENSDART00000081945.3	83.12	4e-50	198
on.mrna.LG1.188.1	m.2623	ENSDART00000020327.8	94.23	5e-14	79.8
on.mrna.LG1.189.1	m.5053	ENSDART00000063150.4	100	0.011	42.1
on.mrna.LG1.19.1	m.13	ENSDART00000098904.3	81.53	8e-61	236
on.mrna.LG1.19.2	m.9	ENSDART00000098904.3	81.53	8e-61	236
on.mrna.LG1.19.3	m.5	ENSDART00000098904.3	81.53	8e-61	236
on.mrna.LG1.19.4	m.1	ENSDART00000098904.3	81.53	7e-61	236
on.mrna.LG1.190.1	m.4042	ENSDART00000084069.4	100	0.15	38.2
on.mrna.LG1.190.2	m.4046	ENSDART00000084069.4	100	0.23	38.2
on.mrna.LG1.190.3	m.4048	ENSDART00000084069.4	100	0.15	38.2
on.mrna.LG1.190.4	m.4044	ENSDART00000084069.4	100	0.23	38.2
on.mrna.LG1.191.1	m.377	ENSDART00000026011.8	87.8	0.012	42.1
on.mrna.LG1.191.2	m.374	ENSDART00000026011.8	87.8	0.016	42.1
on.mrna.LG1.191.2	m.375	ENSDART00000026011.8	87.8	0.015	42.1
on.mrna.LG1.192.1	m.2747	ENSDART00000168816.1	88.42	3e-20	101
on.mrna.LG1.193.1	m.4302	ENSDART00000126093.2	81.36	1e-34	149
on.mrna.LG1.194.1	m.1092	ENSDART00000132379.1	86.08	2e-10	69.9
on.mrna.LG1.194.10	m.1191	ENSDART00000132379.1	86.08	2e-10	69.9
on.mrna.LG1.194.11	m.1159	ENSDART00000132379.1	86.08	2e-10	69.9
on.mrna.LG1.194.12	m.1099	ENSDART00000132379.1	86.08	2e-10	69.9
on.mrna.LG1.194.13	m.1110	ENSDART00000132379.1	86.08	2e-10	69.9
on.mrna.LG1.194.14	m.1083	ENSDART00000132379.1	86.08	2e-10	69.9
on.mrna.LG1.194.15	m.1195	ENSDART00000132379.1	86.08	2e-10	69.9
on.mrna.LG1.194.16	m.1070	ENSDART00000132379.1	86.08	2e-10	69.9
on.mrna.LG1.194.17	m.1035	ENSDART00000132379.1	86.08	2e-10	69.9
on.mrna.LG1.194.18	m.1053	ENSDART00000132379.1	86.08	2e-10	69.9
on.mrna.LG1.194.19	m.1072	ENSDART00000132379.1	86.08	2e-10	69.9
on.mrna.LG1.194.2	m.1056	ENSDART00000132379.1	86.08	2e-10	69.9
on.mrna.LG1.194.20	m.1050	ENSDART00000132379.1	86.08	2e-10	69.9
on.mrna.LG1.194.21	m.1145	ENSDART00000132379.1	86.08	2e-10	69.9
on.mrna.LG1.194.22	m.1078	ENSDART00000132379.1	86.08	2e-10	69.9
on.mrna.LG1.194.23	m.1176	ENSDART00000132379.1	86.08	2e-10	69.9
on.mrna.LG1.194.24	m.1116	ENSDART00000132379.1	86.08	2e-10	69.9
on.mrna.LG1.194.25	m.1197	ENSDART00000132379.1	86.08	2e-10	69.9
on.mrna.LG1.194.26	m.1096	ENSDART00000132379.1	86.08	2e-10	69.9
on.mrna.LG1.194.27	m.1169	ENSDART00000132379.1	86.08	2e-10	69.9
on.mrna.LG1.194.28	m.1141	ENSDART00000132379.1	86.08	2e-10	69.9
on.mrna.LG1.194.29	m.1129	ENSDART00000132379.1	86.08	2e-10	69.9
on.mrna.LG1.194.3	m.1165	ENSDART00000132379.1	86.08	2e-10	69.9
on.mrna.LG1.194.30	m.1041	ENSDART00000132379.1	86.08	2e-10	69.9
on.mrna.LG1.194.31	m.1064	ENSDART00000132379.1	86.08	2e-10	69.9
on.mrna.LG1.194.32	m.1135	ENSDART00000132379.1	86.08	2e-10	69.9
on.mrna.LG1.194.33	m.1032	ENSDART00000132379.1	86.08	2e-10	69.9
on.mrna.LG1.194.34	m.1200	ENSDART00000132379.1	86.08	2e-10	69.9
on.mrna.LG1.194.35	m.1153	ENSDART00000132379.1	86.08	2e-10	69.9
on.mrna.LG1.194.36	m.1113	ENSDART00000132379.1	86.08	2e-10	69.9
on.mrna.LG1.194.37	m.1038	ENSDART00000132379.1	86.08	2e-10	69.9
on.mrna.LG1.194.38	m.1067	ENSDART00000132379.1	86.08	2e-10	69.9
on.mrna.LG1.194.39	m.1120	ENSDART00000132379.1	86.08	2e-10	69.9
on.mrna.LG1.194.4	m.1180	ENSDART00000132379.1	86.08	2e-10	69.9
on.mrna.LG1.194.40	m.1102	ENSDART00000132379.1	86.08	2e-10	69.9
on.mrna.LG1.194.41	m.1150	ENSDART00000132379.1	86.08	2e-10	69.9
on.mrna.LG1.194.42	m.1081	ENSDART00000132379.1	86.08	2e-10	69.9
on.mrna.LG1.194.43	m.1188	ENSDART00000132379.1	86.08	2e-10	69.9
on.mrna.LG1.194.44	m.1126	ENSDART00000132379.1	86.08	2e-10	69.9
on.mrna.LG1.194.45	m.1108	ENSDART00000132379.1	86.08	2e-10	69.9
on.mrna.LG1.194.46	m.1048	ENSDART00000132379.1	86.08	2e-10	69.9
on.mrna.LG1.194.47	m.1075	ENSDART00000132379.1	86.08	2e-10	69.9
on.mrna.LG1.194.48	m.1172	ENSDART00000132379.1	86.08	2e-10	69.9
on.mrna.LG1.194.49	m.1060	ENSDART00000132379.1	86.08	2e-10	69.9
on.mrna.LG1.194.5	m.1086	ENSDART00000132379.1	86.08	2e-10	69.9
on.mrna.LG1.194.50	m.1089	ENSDART00000132379.1	86.08	2e-10	69.9
on.mrna.LG1.194.51	m.1045	ENSDART00000132379.1	86.08	2e-10	69.9
on.mrna.LG1.194.52	m.1184	ENSDART00000132379.1	86.08	2e-10	69.9
on.mrna.LG1.194.53	m.1132	ENSDART00000132379.1	86.08	2e-10	69.9
on.mrna.LG1.194.54	m.1156	ENSDART00000132379.1	86.08	2e-10	69.9
on.mrna.LG1.194.55	m.1148	ENSDART00000132379.1	86.08	2e-10	69.9
on.mrna.LG1.194.6	m.1123	ENSDART00000132379.1	86.08	2e-10	69.9
on.mrna.LG1.194.7	m.1138	ENSDART00000132379.1	86.08	2e-10	69.9
on.mrna.LG1.194.8	m.1162	ENSDART00000132379.1	86.08	2e-10	69.9
on.mrna.LG1.194.9	m.1104	ENSDART00000132379.1	86.08	2e-10	69.9
on.mrna.LG1.1940001.1	m.828	ENSDART00000075584.4	80.47	7e-07	56
on.mrna.LG1.195.1	m.4028	ENSDART00000114975.3	79.94	3e-63	244
on.mrna.LG1.196.1	m.3431	ENSDART00000046094.5	81.74	1e-66	254
on.mrna.LG1.196.2	m.3432	ENSDART00000046094.5	81.74	1e-66	254
on.mrna.LG1.197.1	m.3264	ENSDART00000042984.6	84.62	3e-40	168
on.mrna.LG1.197.2	m.3266	ENSDART00000042984.6	84.62	3e-40	168
on.mrna.LG1.1970001.1	m.3242	ENSDART00000131664.2	96.3	0.001	46.1
on.mrna.LG1.1970001.2	m.3243	ENSDART00000131664.2	96.3	0.001	46.1
on.mrna.LG1.198.1	m.3933	ENSDART00000016417.8	87.8	1e-65	250
on.mrna.LG1.198.2	m.3930	ENSDART00000016417.8	87.8	1e-65	250
on.mrna.LG1.198.3	m.3927	ENSDART00000016417.8	87.8	1e-65	250
on.mrna.LG1.199.1	m.932	ENSDART00000073735.2	80.66	4e-83	309
on.mrna.LG1.199.2	m.933	ENSDART00000073735.2	81.46	3e-52	206
on.mrna.LG1.199.3	m.934	ENSDART00000073735.2	80.66	4e-83	309
on.mrna.LG1.2.1	m.5137	ENSDART00000084530.5	80.25	8e-60	232
on.mrna.LG1.2.2	m.5135	ENSDART00000084530.5	78.9	2e-79	297
on.mrna.LG1.2.3	m.5138	ENSDART00000084530.5	78.9	2e-79	297
on.mrna.LG1.20.1	m.4372	ENSDART00000067514.5	82.85	4e-94	345
on.mrna.LG1.20.10	m.4374	ENSDART00000067514.5	82.82	2e-81	303
on.mrna.LG1.20.11	m.4370	ENSDART00000067514.5	82.82	2e-81	303
on.mrna.LG1.20.12	m.4366	ENSDART00000006619.7	88.26	9e-74	278
on.mrna.LG1.20.13	m.4361	ENSDART00000006619.7	87.5	8e-24	111
on.mrna.LG1.20.14	m.4365	ENSDART00000006619.7	87.5	9e-24	111
on.mrna.LG1.20.2	m.4363	ENSDART00000067514.5	82.85	6e-94	345
on.mrna.LG1.20.3	m.4371	ENSDART00000067514.5	82.85	4e-94	345
on.mrna.LG1.20.4	m.4364	ENSDART00000067514.5	82.82	1e-81	303
on.mrna.LG1.20.5	m.4373	ENSDART00000067514.5	82.82	1e-81	303
on.mrna.LG1.20.6	m.4369	ENSDART00000067514.5	82.82	2e-81	303
on.mrna.LG1.20.7	m.4362	ENSDART00000067514.5	82.85	6e-94	345
on.mrna.LG1.20.8	m.4367	ENSDART00000134832.1	87.18	2e-24	113
on.mrna.LG1.20.9	m.4368	ENSDART00000134832.1	87.18	2e-24	113
on.mrna.LG1.200.1	m.3835	ENSDART00000165077.2	79.72	7e-53	210
on.mrna.LG1.200.2	m.3837	ENSDART00000165077.2	81.59	3e-51	204
on.mrna.LG1.200.3	m.3839	ENSDART00000165077.2	79.72	5e-53	210
on.mrna.LG1.201.1	m.3585	ENSDART00000066380.5	88.89	0.035	40.1
on.mrna.LG1.201.2	m.3584	ENSDART00000066380.5	88.89	0.043	40.1
on.mrna.LG1.202.1	m.229	ENSDART00000019270.7	80.75	4e-78	293
on.mrna.LG1.202.2	m.226	ENSDART00000019270.7	81.06	2e-42	174
on.mrna.LG1.202.3	m.231	ENSDART00000019270.7	80.75	3e-78	293
on.mrna.LG1.202.4	m.228	ENSDART00000019270.7	80.75	2e-78	293
on.mrna.LG1.203.1	m.2542	ENSDART00000098976.3	91.18	0.006	44.1
on.mrna.LG1.204.1	m.1503	ENSDART00000037850.7	79.82	5e-114	412
on.mrna.LG1.204.2	m.1507	ENSDART00000037850.7	79.82	5e-114	412
on.mrna.LG1.204.3	m.1505	ENSDART00000037850.7	79.82	5e-114	412
on.mrna.LG1.205.1	m.400	ENSDART00000005033.9	83.12	3e-05	50.1
on.mrna.LG1.206.1	m.3493	ENSDART00000012457.6	100	1.1	34.2
on.mrna.LG1.206.2	m.3494	ENSDART00000012457.6	100	1.4	34.2
on.mrna.LG1.207.1	m.5520	ENSDART00000149478.2	78.18	2e-21	105
on.mrna.LG1.208.1	m.1988	ENSDART00000171736.1	82.44	3e-63	242
on.mrna.LG1.208.2	m.1984	ENSDART00000171736.1	81.63	4e-37	155
on.mrna.LG1.208.3	m.1986	ENSDART00000171736.1	81.25	7e-17	87.7
on.mrna.LG1.208.4	m.1987	ENSDART00000171736.1	81.25	7e-17	87.7
on.mrna.LG1.208.5	m.1989	ENSDART00000171736.1	81.25	7e-17	87.7
on.mrna.LG1.209.1	m.3637	ENSDART00000021009.8	80.7	5e-81	303
on.mrna.LG1.209.2	m.3634	ENSDART00000021009.8	84.26	8e-77	289
on.mrna.LG1.209.3	m.3640	ENSDART00000021009.8	84.26	7e-77	289
on.mrna.LG1.209.4	m.3631	ENSDART00000021009.8	80.7	5e-81	303
on.mrna.LG1.21.1	m.1008	ENSDART00000067512.6	82.65	2e-133	476
on.mrna.LG1.210.1	m.4755	ENSDART00000082780.5	81.3	8e-27	123
on.mrna.LG1.210.2	m.4753	ENSDART00000082780.5	81.3	8e-27	123
on.mrna.LG1.211.1	m.5468	ENSDART00000098453.3	78.79	1e-16	89.7
on.mrna.LG1.211.2	m.5464	ENSDART00000098453.3	82.09	1e-23	113
on.mrna.LG1.212.1	m.1764	ENSDART00000098438.4	81.3	0	938
on.mrna.LG1.213.1	m.4426	ENSDART00000073594.4	83.77	0	842
on.mrna.LG1.215.1	m.452	ENSDART00000112483.3	86.05	9e-24	113
on.mrna.LG1.216.1	m.3938	ENSDART00000007335.7	95.45	1.1	36.2
on.mrna.LG1.217.1	m.2104	ENSDART00000020851.8	84.06	7e-20	99.6
on.mrna.LG1.218.1	m.4972	ENSDART00000128986.2	100	0.21	38.2
on.mrna.LG1.218.2	m.4970	ENSDART00000128986.2	100	0.18	38.2
on.mrna.LG1.2180001.1	m.4483	ENSDART00000161115.1	87.84	1e-12	75.8
on.mrna.LG1.2180001.1	m.4484	ENSDART00000161115.1	87.84	1e-12	75.8
on.mrna.LG1.219.1	m.3135	ENSDART00000073597.3	96.15	0.002	44.1
on.mrna.LG1.22.1	m.3822	ENSDART00000148995.1	79.15	8e-32	139
on.mrna.LG1.220.1	m.2742	ENSDART00000073596.6	82.48	4e-95	349
on.mrna.LG1.220.2	m.2745	ENSDART00000073596.6	82.48	5e-95	349
on.mrna.LG1.220.3	m.2744	ENSDART00000073596.6	82.48	4e-95	349
on.mrna.LG1.221.1	m.2424	ENSDART00000004782.7	79.84	2e-49	198
on.mrna.LG1.222.1	m.3314	ENSDART00000066806.5	88.14	1e-08	61.9
on.mrna.LG1.222.2	m.3312	ENSDART00000066806.5	88.14	9e-09	61.9
on.mrna.LG1.222.3	m.3315	ENSDART00000066806.5	88.14	8e-09	61.9
on.mrna.LG1.223.1	m.5550	ENSDART00000027329.7	81.34	2e-62	240
on.mrna.LG1.223.2	m.5549	ENSDART00000027329.7	81.34	2e-62	240
on.mrna.LG1.224.1	m.4917	ENSDART00000029646.6	91.55	2e-18	93.7
on.mrna.LG1.224.2	m.4919	ENSDART00000029646.6	91.55	1e-18	93.7
on.mrna.LG1.225.1	m.960	ENSDART00000035710.5	84.17	8e-108	391
on.mrna.LG1.225.2	m.958	ENSDART00000035710.5	84.17	8e-108	391
on.mrna.LG1.226.1	m.194	ENSDART00000014843.5	89.53	2e-152	539
on.mrna.LG1.226.2	m.189	ENSDART00000014843.5	89.53	2e-152	539
on.mrna.LG1.226.3	m.193	ENSDART00000014843.5	89.53	2e-152	539
on.mrna.LG1.226.4	m.192	ENSDART00000014843.5	89.53	2e-152	539
on.mrna.LG1.226.5	m.190	ENSDART00000014843.5	89.53	2e-152	539
on.mrna.LG1.226.6	m.191	ENSDART00000014843.5	89.53	2e-152	539
on.mrna.LG1.227.1	m.3002	ENSDART00000023568.9	77.97	2e-31	139
on.mrna.LG1.227.2	m.3000	ENSDART00000023568.9	77.97	2e-31	139
on.mrna.LG1.228.1	m.2019	ENSDART00000123463.2	88.54	7e-41	168
on.mrna.LG1.228.2	m.2017	ENSDART00000123463.2	88.54	7e-41	168
on.mrna.LG1.228.3	m.2015	ENSDART00000123463.2	88.54	1e-40	168
on.mrna.LG1.228.4	m.2013	ENSDART00000123463.2	88.54	1e-40	168
on.mrna.LG1.229.1	m.3621	ENSDART00000023265.8	100	0.094	40.1
on.mrna.LG1.23.1	m.5257	ENSDART00000067510.4	81.85	2e-36	153
on.mrna.LG1.230.1	m.1256	ENSDART00000130442.2	100	0.78	36.2
on.mrna.LG1.230.1	m.1257	ENSDART00000130442.2	100	0.78	36.2
on.mrna.LG1.232.1	m.4638	ENSDART00000029262.7	100	0.74	36.2
on.mrna.LG1.233.1	m.3275	ENSDART00000085419.4	88.73	7e-13	77.8
on.mrna.LG1.234.1	m.3965	ENSDART00000174217.1	79.25	3e-148	527
on.mrna.LG1.234.2	m.3967	ENSDART00000174217.1	79.25	3e-148	527
on.mrna.LG1.2340001.1	m.3561	ENSDART00000135239.2	100	0.08	38.2
on.mrna.LG1.235.1	m.3831	ENSDART00000162579.1	100	1.3	34.2
on.mrna.LG1.236.1	m.2499	ENSDART00000161495.1	100	0.011	42.1
on.mrna.LG1.236.2	m.2503	ENSDART00000166797.1	100	0.004	44.1
on.mrna.LG1.236.3	m.2501	ENSDART00000166797.1	100	0.004	44.1
on.mrna.LG1.236.4	m.2505	ENSDART00000166797.1	100	0.004	44.1
on.mrna.LG1.236.5	m.2507	ENSDART00000166797.1	100	0.004	44.1
on.mrna.LG1.237.1	m.299	ENSDART00000126565.3	81.22	7e-63	242
on.mrna.LG1.238.1	m.1508	ENSDART00000173808.1	88.89	8e-05	50.1
on.mrna.LG1.239.1	m.3694	ENSDART00000099872.5	82.1	0	870
on.mrna.LG1.239.2	m.3692	ENSDART00000099872.5	82.1	0	870
on.mrna.LG1.239.3	m.3696	ENSDART00000099872.5	81.73	0	652
on.mrna.LG1.240.1	m.488	ENSDART00000099919.4	80.41	7e-90	333
on.mrna.LG1.240.2	m.491	ENSDART00000099919.4	80.41	7e-90	333
on.mrna.LG1.241.1	m.2993	ENSDART00000109440.3	100	0.51	36.2
on.mrna.LG1.242.1	m.5246	ENSDART00000111388.4	84.93	2e-07	58
on.mrna.LG1.243.1	m.1620	ENSDART00000028607.8	100	0.33	36.2
on.mrna.LG1.244.1	m.3433	ENSDART00000075398.6	78.05	2e-72	276
on.mrna.LG1.245.1	m.5046	ENSDART00000124820.3	85.96	0.0003	50.1
on.mrna.LG1.245.2	m.5039	ENSDART00000124820.3	85.96	0.0003	50.1
on.mrna.LG1.246.1	m.2244	ENSDART00000085505.6	81.59	1e-90	335
on.mrna.LG1.246.2	m.2245	ENSDART00000085505.6	81.59	1e-90	335
on.mrna.LG1.246.3	m.2246	ENSDART00000085505.6	81.59	1e-90	335
on.mrna.LG1.246.4	m.2248	ENSDART00000085505.6	81.59	1e-90	335
on.mrna.LG1.246.5	m.2247	ENSDART00000085505.6	81.59	1e-90	335
on.mrna.LG1.248.1	m.2567	ENSDART00000114148.4	80.87	2e-41	170
on.mrna.LG1.249.1	m.343	ENSDART00000169462.2	82.76	1e-91	339
on.mrna.LG1.249.2	m.347	ENSDART00000169462.2	82.76	9e-92	339
on.mrna.LG1.249.3	m.350	ENSDART00000169462.2	83.04	1e-75	285
on.mrna.LG1.25.1	m.2339	ENSDART00000083539.5	84.47	4e-49	198
on.mrna.LG1.25.1	m.2340	ENSDART00000167453.1	79.68	3e-74	281
on.mrna.LG1.250.1	m.1710	ENSDART00000173937.1	86.69	5e-88	327
on.mrna.LG1.250.2	m.1698	ENSDART00000108721.3	85.3	2e-115	418
on.mrna.LG1.250.3	m.1714	ENSDART00000173937.1	86.69	4e-88	327
on.mrna.LG1.250.4	m.1702	ENSDART00000173937.1	86.69	4e-88	327
on.mrna.LG1.250.5	m.1706	ENSDART00000173937.1	86.69	3e-88	327
on.mrna.LG1.251.1	m.4676	ENSDART00000155992.2	80.82	8e-41	168
on.mrna.LG1.251.2	m.4675	ENSDART00000108721.3	82.23	5e-32	139
on.mrna.LG1.252.1	m.2479	ENSDART00000075421.4	79.23	4e-37	157
on.mrna.LG1.252.2	m.2478	ENSDART00000075421.4	78.8	2e-29	131
on.mrna.LG1.253.1	m.423	ENSDART00000085661.5	85.24	0	1007
on.mrna.LG1.253.2	m.433	ENSDART00000085661.5	85.24	0	1007
on.mrna.LG1.253.3	m.428	ENSDART00000085661.5	85.33	0	787
on.mrna.LG1.253.4	m.418	ENSDART00000085661.5	85.24	0	1007
on.mrna.LG1.253.5	m.413	ENSDART00000085661.5	85.24	0	1007
on.mrna.LG1.254.1	m.4205	ENSDART00000154038.2	85.6	1e-21	105
on.mrna.LG1.254.2	m.4189	ENSDART00000154038.2	85.6	2e-21	105
on.mrna.LG1.254.2	m.4190	ENSDART00000171777.2	83.89	1e-21	105
on.mrna.LG1.254.3	m.4194	ENSDART00000154038.2	85.6	2e-21	105
on.mrna.LG1.254.3	m.4195	ENSDART00000171777.2	83.89	1e-21	105
on.mrna.LG1.254.4	m.4199	ENSDART00000171777.2	83.78	7e-21	103
on.mrna.LG1.254.4	m.4200	ENSDART00000171777.2	83.89	1e-21	105
on.mrna.LG1.254.5	m.4183	ENSDART00000171777.2	83.78	6e-21	103
on.mrna.LG1.254.5	m.4184	ENSDART00000171777.2	83.89	1e-21	105
on.mrna.LG1.255.1	m.1850	ENSDART00000091616.7	84.89	2e-43	176
on.mrna.LG1.255.2	m.1852	ENSDART00000091616.7	84.89	2e-43	176
on.mrna.LG1.255.3	m.1851	ENSDART00000091616.7	84.89	2e-43	176
on.mrna.LG1.256.1	m.5098	ENSDART00000049230.7	96.55	8e-05	50.1
on.mrna.LG1.256.2	m.5112	ENSDART00000049230.7	96.55	8e-05	50.1
on.mrna.LG1.256.3	m.5109	ENSDART00000049230.7	96.55	8e-05	50.1
on.mrna.LG1.256.4	m.5105	ENSDART00000044574.8	95.83	0.049	40.1
on.mrna.LG1.256.5	m.5115	ENSDART00000044574.8	95.83	0.057	40.1
on.mrna.LG1.256.6	m.5101	ENSDART00000044574.8	95.83	0.063	40.1
on.mrna.LG1.256.7	m.5102	ENSDART00000049230.7	96.55	8e-05	50.1
on.mrna.LG1.256.8	m.5106	ENSDART00000049230.7	96.55	8e-05	50.1
on.mrna.LG1.257.1	m.1016	ENSDART00000091567.5	79.29	0	646
on.mrna.LG1.257.2	m.1018	ENSDART00000166318.1	79.18	0	696
on.mrna.LG1.257.3	m.1021	ENSDART00000166318.1	79.42	0	694
on.mrna.LG1.2570001.1	m.978	ENSDART00000090675.4	100	0.007	42.1
on.mrna.LG1.258.1	m.3424	ENSDART00000079165.5	80.95	0	1003
on.mrna.LG1.259.1	m.5224	ENSDART00000124363.3	86.06	2e-63	244
on.mrna.LG1.26.1	m.1853	ENSDART00000126397.3	85	2e-09	63.9
on.mrna.LG1.260.1	m.4736	ENSDART00000101018.5	82.48	3e-14	81.8
on.mrna.LG1.260.2	m.4732	ENSDART00000101018.5	82.48	3e-14	81.8
on.mrna.LG1.260.3	m.4735	ENSDART00000101018.5	82.48	3e-14	81.8
on.mrna.LG1.260.4	m.4733	ENSDART00000101018.5	82.48	3e-14	81.8
on.mrna.LG1.260.5	m.4730	ENSDART00000101018.5	82.48	3e-14	81.8
on.mrna.LG1.260.6	m.4734	ENSDART00000101018.5	82.48	3e-14	81.8
on.mrna.LG1.260.7	m.4731	ENSDART00000101018.5	82.48	3e-14	81.8
on.mrna.LG1.261.1	m.3867	ENSDART00000052731.6	87.85	2e-23	109
on.mrna.LG1.261.2	m.3868	ENSDART00000052731.6	80.55	3e-125	450
on.mrna.LG1.261.3	m.3871	ENSDART00000052731.6	80.55	3e-125	450
on.mrna.LG1.262.1	m.3168	ENSDART00000110605.3	84.9	1e-81	305
on.mrna.LG1.262.10	m.3162	ENSDART00000110605.3	84.9	2e-81	305
on.mrna.LG1.262.11	m.3172	ENSDART00000110605.3	90.28	3e-43	178
on.mrna.LG1.262.12	m.3159	ENSDART00000110605.3	90.28	3e-43	178
on.mrna.LG1.262.13	m.3161	ENSDART00000110605.3	80.91	7e-24	113
on.mrna.LG1.262.14	m.3160	ENSDART00000110605.3	80.91	9e-24	113
on.mrna.LG1.262.15	m.3158	ENSDART00000110605.3	86.84	2e-11	71.9
on.mrna.LG1.262.2	m.3165	ENSDART00000110605.3	84.9	2e-81	305
on.mrna.LG1.262.3	m.3157	ENSDART00000110605.3	84.9	2e-81	305
on.mrna.LG1.262.4	m.3164	ENSDART00000110605.3	84.9	2e-81	305
on.mrna.LG1.262.5	m.3166	ENSDART00000110605.3	84.9	2e-81	305
on.mrna.LG1.262.6	m.3174	ENSDART00000110605.3	84.9	2e-81	305
on.mrna.LG1.262.7	m.3173	ENSDART00000110605.3	84.9	2e-81	305
on.mrna.LG1.262.8	m.3167	ENSDART00000110605.3	84.9	2e-81	305
on.mrna.LG1.262.9	m.3163	ENSDART00000110605.3	84.9	2e-81	305
on.mrna.LG1.263.1	m.2572	ENSDART00000100998.3	80.78	0	682
on.mrna.LG1.263.2	m.2581	ENSDART00000100998.3	80.78	0	682
on.mrna.LG1.263.3	m.2578	ENSDART00000100998.3	80.94	0	704
on.mrna.LG1.263.4	m.2569	ENSDART00000100998.3	80.78	0	682
on.mrna.LG1.263.5	m.2575	ENSDART00000100998.3	80.78	0	682
on.mrna.LG1.264.1	m.2933	ENSDART00000011715.8	100	1.3	34.2
on.mrna.LG1.265.1	m.2291	ENSDART00000079091.3	84.29	2e-05	52
on.mrna.LG1.265.3	m.2273	ENSDART00000079091.3	84.29	2e-05	52
on.mrna.LG1.266.1	m.546	ENSDART00000173932.1	81.7	2e-146	521
on.mrna.LG1.267.1	m.1486	ENSDART00000079042.6	83.05	0	1740
on.mrna.LG1.267.2	m.1459	ENSDART00000079042.6	83.25	0	1647
on.mrna.LG1.267.3	m.1470	ENSDART00000079042.6	83.07	0	1703
on.mrna.LG1.267.4	m.1497	ENSDART00000079042.6	83.25	0	1647
on.mrna.LG1.267.5	m.1465	ENSDART00000079042.6	83.05	0	1740
on.mrna.LG1.267.6	m.1480	ENSDART00000079042.6	83.25	0	1647
on.mrna.LG1.267.7	m.1475	ENSDART00000079042.6	83.07	0	1703
on.mrna.LG1.267.8	m.1491	ENSDART00000079042.6	83.25	0	1647
on.mrna.LG1.268.1	m.3357	ENSDART00000052656.5	84.22	9e-123	440
on.mrna.LG1.268.2	m.3359	ENSDART00000052656.5	84.83	1e-84	313
on.mrna.LG1.268.3	m.3360	ENSDART00000052656.5	84.83	1e-84	313
on.mrna.LG1.269.1	m.4503	ENSDART00000089574.6	83.24	1e-133	478
on.mrna.LG1.269.2	m.4497	ENSDART00000089574.6	83.24	1e-133	478
on.mrna.LG1.269.3	m.4500	ENSDART00000089574.6	83.24	1e-133	478
on.mrna.LG1.269.4	m.4494	ENSDART00000089574.6	83.24	7e-134	478
on.mrna.LG1.27.1	m.2486	ENSDART00000174354.1	84.39	0	1241
on.mrna.LG1.27.2	m.2496	ENSDART00000111161.3	83.97	0	1039
on.mrna.LG1.27.3	m.2491	ENSDART00000174354.1	84.39	0	1241
on.mrna.LG1.270.1	m.1981	ENSDART00000173842.1	94.44	1e-06	56
on.mrna.LG1.271.1	m.3363	ENSDART00000044208.5	93.61	0	646
on.mrna.LG1.271.2	m.3361	ENSDART00000044208.5	93.8	0	698
on.mrna.LG1.272.1	m.3292	ENSDART00000052134.4	100	3.5	34.2
on.mrna.LG1.272.1	m.3293	ENSDART00000052134.4	100	3.5	34.2
on.mrna.LG1.272.2	m.3288	ENSDART00000052134.4	100	4.5	34.2
on.mrna.LG1.272.2	m.3289	ENSDART00000052134.4	100	4.5	34.2
on.mrna.LG1.273.1	m.3316	ENSDART00000054368.4	81.38	0	724
on.mrna.LG1.274.1	m.3849	ENSDART00000028887.6	83.57	2e-62	240
on.mrna.LG1.275.1	m.317	ENSDART00000054366.7	78.64	2e-89	331
on.mrna.LG1.275.2	m.324	ENSDART00000054366.7	77.58	4e-35	151
on.mrna.LG1.275.3	m.313	ENSDART00000054366.7	81.82	4e-104	381
on.mrna.LG1.275.4	m.320	ENSDART00000054366.7	81.82	3e-104	381
on.mrna.LG1.277.1	m.5280	ENSDART00000060545.6	83.54	4e-122	440
on.mrna.LG1.278.1	m.3276	ENSDART00000098277.4	79.08	3e-43	176
on.mrna.LG1.278.2	m.3280	ENSDART00000098277.4	81.02	1e-29	131
on.mrna.LG1.278.3	m.3278	ENSDART00000098277.4	79.08	3e-43	176
on.mrna.LG1.279.1	m.3371	ENSDART00000108471.2	82.93	0	1574
on.mrna.LG1.279.2	m.3381	ENSDART00000108471.2	82.93	0	1574
on.mrna.LG1.279.3	m.3386	ENSDART00000108471.2	82.24	0	1584
on.mrna.LG1.279.4	m.3376	ENSDART00000108471.2	82.24	0	1584
on.mrna.LG1.28.1	m.5665	ENSDART00000042473.4	100	2.7	36.2
on.mrna.LG1.28.2	m.5673	ENSDART00000042473.4	100	2.8	36.2
on.mrna.LG1.28.3	m.5657	ENSDART00000042473.4	100	2.6	36.2
on.mrna.LG1.28.4	m.5680	ENSDART00000042473.4	100	2.9	36.2
on.mrna.LG1.280.1	m.3259	ENSDART00000100105.5	81.07	5e-20	99.6
on.mrna.LG1.280.2	m.3257	ENSDART00000100105.5	86.36	1e-19	99.6
on.mrna.LG1.281.1	m.2611	ENSDART00000082664.5	78.4	0	696
on.mrna.LG1.281.2	m.2608	ENSDART00000082664.5	80.92	0	656
on.mrna.LG1.281.3	m.2617	ENSDART00000082664.5	78.4	0	696
on.mrna.LG1.281.4	m.2620	ENSDART00000082664.5	80.92	0	656
on.mrna.LG1.281.5	m.2614	ENSDART00000082664.5	80.92	0	656
on.mrna.LG1.2810001.1	m.1219	ENSDART00000155954.1	100	0.002	44.1
on.mrna.LG1.282.1	m.4465	ENSDART00000145073.2	100	0.25	36.2
on.mrna.LG1.282.2	m.4467	ENSDART00000145073.2	100	0.25	36.2
on.mrna.LG1.282.3	m.4466	ENSDART00000145073.2	100	0.25	36.2
on.mrna.LG1.283.1	m.3779	ENSDART00000003612.7	79.23	2e-108	394
on.mrna.LG1.2830001.1	m.4679	ENSDART00000056614.7	100	0.63	36.2
on.mrna.LG1.2830001.2	m.4677	ENSDART00000056614.7	100	0.69	36.2
on.mrna.LG1.2830001.3	m.4681	ENSDART00000160000.1	100	0.52	36.2
on.mrna.LG1.284.1	m.442	ENSDART00000114427.3	85	6e-28	127
on.mrna.LG1.284.1	m.443	ENSDART00000114427.3	89.42	1e-25	119
on.mrna.LG1.285.1	m.1627	ENSDART00000021317.8	83.8	0	1840
on.mrna.LG1.285.2	m.1623	ENSDART00000021317.8	83.8	0	1840
on.mrna.LG1.285.3	m.1631	ENSDART00000021317.8	83.8	0	1840
on.mrna.LG1.286.1	m.2193	ENSDART00000027616.8	84.92	0	745
on.mrna.LG1.286.2	m.2188	ENSDART00000027616.8	84.92	0	745
on.mrna.LG1.287.1	m.2510	ENSDART00000082604.4	80.18	3e-134	480
on.mrna.LG1.288.1	m.1978	ENSDART00000154961.1	82.29	5e-151	535
on.mrna.LG1.288.2	m.1976	ENSDART00000154961.1	82.29	5e-151	535
on.mrna.LG1.288.3	m.1977	ENSDART00000154961.1	82.29	5e-151	535
on.mrna.LG1.288.4	m.1979	ENSDART00000154961.1	82.29	5e-151	535
on.mrna.LG1.288.5	m.1975	ENSDART00000154961.1	82.29	5e-151	535
on.mrna.LG1.2880001.1	m.329	ENSDART00000109147.3	100	0.1	38.2
on.mrna.LG1.289.1	m.3602	ENSDART00000082740.5	83.78	0	652
on.mrna.LG1.289.2	m.3610	ENSDART00000150143.2	83.87	0	821
on.mrna.LG1.289.3	m.3607	ENSDART00000150143.2	83.87	0	821
on.mrna.LG1.29.1	m.3535	ENSDART00000099333.5	84.27	6e-10	65.9
on.mrna.LG1.29.2	m.3538	ENSDART00000138661.2	84.38	1e-11	71.9
on.mrna.LG1.29.3	m.3537	ENSDART00000138661.2	84.38	1e-11	71.9
on.mrna.LG1.290.1	m.1999	ENSDART00000156301.2	78.93	3e-95	351
on.mrna.LG1.290.10	m.2001	ENSDART00000082679.5	83.1	9e-49	196
on.mrna.LG1.290.2	m.2002	ENSDART00000156301.2	78.93	3e-95	351
on.mrna.LG1.290.3	m.1992	ENSDART00000156301.2	78.93	3e-95	351
on.mrna.LG1.290.4	m.1995	ENSDART00000156301.2	78.93	4e-95	351
on.mrna.LG1.290.5	m.1997	ENSDART00000156301.2	78.93	4e-95	351
on.mrna.LG1.290.6	m.1990	ENSDART00000156301.2	78.93	3e-95	351
on.mrna.LG1.290.7	m.2006	ENSDART00000156301.2	78.93	3e-95	351
on.mrna.LG1.290.8	m.2009	ENSDART00000156301.2	78.93	3e-95	351
on.mrna.LG1.290.9	m.2005	ENSDART00000082679.5	83.1	1e-48	196
on.mrna.LG1.293.1	m.4154	ENSDART00000084282.6	100	0.69	36.2
on.mrna.LG1.293.2	m.4152	ENSDART00000125459.3	95.45	0.49	36.2
on.mrna.LG1.294.1	m.1941	ENSDART00000166109.1	80.93	0	1114
on.mrna.LG1.294.2	m.1952	ENSDART00000166109.1	81.82	0	1094
on.mrna.LG1.294.3	m.1966	ENSDART00000166109.1	81.82	0	1094
on.mrna.LG1.294.4	m.1947	ENSDART00000166109.1	81.82	0	1094
on.mrna.LG1.294.5	m.1962	ENSDART00000166109.1	81.86	0	815
on.mrna.LG1.294.6	m.1957	ENSDART00000166109.1	81.82	0	1094
on.mrna.LG1.295.1	m.3004	ENSDART00000160374.1	82.35	4e-05	50.1
on.mrna.LG1.296.1	m.3970	ENSDART00000169228.1	79.27	7e-82	305
on.mrna.LG1.296.2	m.3969	ENSDART00000169228.1	78.3	4e-55	216
on.mrna.LG1.297.1	m.3630	ENSDART00000162693.1	82.61	9e-20	97.6
on.mrna.LG1.298.1	m.367	ENSDART00000173234.1	82.74	7e-46	188
on.mrna.LG1.298.2	m.360	ENSDART00000173234.1	82.74	7e-46	188
on.mrna.LG1.299.1	m.5132	ENSDART00000167564.1	90.12	2e-19	97.6
on.mrna.LG1.30.1	m.3946	ENSDART00000109515.3	95.24	1.1	34.2
on.mrna.LG1.30.2	m.3950	ENSDART00000109515.3	95.24	1.1	34.2
on.mrna.LG1.30.3	m.3948	ENSDART00000109515.3	95.24	1.1	34.2
on.mrna.LG1.300.1	m.402	ENSDART00000170575.1	88.24	5e-06	54
on.mrna.LG1.300.2	m.403	ENSDART00000170575.1	88.24	5e-06	54
on.mrna.LG1.301.1	m.4385	ENSDART00000112651.3	100	4.7	34.2
on.mrna.LG1.302.1	m.3628	ENSDART00000162553.1	81.74	0	841
on.mrna.LG1.302.2	m.3629	ENSDART00000162553.1	81.74	0	841
on.mrna.LG1.304.1	m.3549	ENSDART00000168460.1	85.44	1e-147	523
on.mrna.LG1.304.2	m.3548	ENSDART00000168460.1	85.44	1e-147	523
on.mrna.LG1.304.3	m.3550	ENSDART00000168460.1	85.44	9e-148	523
on.mrna.LG1.304.4	m.3551	ENSDART00000168460.1	85.44	9e-148	523
on.mrna.LG1.305.1	m.2532	ENSDART00000159989.1	83.06	3e-106	387
on.mrna.LG1.307.1	m.5452	ENSDART00000172015.1	84.54	2e-34	147
on.mrna.LG1.308.1	m.510	ENSDART00000162978.1	81.32	0	1362
on.mrna.LG1.308.2	m.504	ENSDART00000162978.1	81.32	0	1362
on.mrna.LG1.308.3	m.507	ENSDART00000162978.1	81.32	0	1362
on.mrna.LG1.309.1	m.2109	ENSDART00000166889.1	100	1.5	34.2
on.mrna.LG1.31.1	m.1918	ENSDART00000001376.6	82.61	2e-19	97.6
on.mrna.LG1.31.2	m.1917	ENSDART00000001376.6	82.61	1e-19	97.6
on.mrna.LG1.310.1	m.2557	ENSDART00000167440.1	81.55	4e-172	609
on.mrna.LG1.312.1	m.3574	ENSDART00000162891.1	85.92	2e-08	61.9
on.mrna.LG1.312.1	m.3575	ENSDART00000162891.1	85.92	2e-08	61.9
on.mrna.LG1.313.1	m.5302	ENSDART00000161319.1	82.26	0	710
on.mrna.LG1.314.1	m.4573	ENSDART00000122935.2	86.54	5e-18	95.6
on.mrna.LG1.315.1	m.4415	ENSDART00000170714.1	82.73	0	1518
on.mrna.LG1.315.2	m.4410	ENSDART00000170714.1	82.99	0	1556
on.mrna.LG1.315.3	m.4420	ENSDART00000170714.1	82.99	0	1556
on.mrna.LG1.316.1	m.897	ENSDART00000122902.2	100	0.083	40.1
on.mrna.LG1.316.10	m.904	ENSDART00000122902.2	100	0.079	40.1
on.mrna.LG1.316.2	m.911	ENSDART00000149903.2	100	0.071	40.1
on.mrna.LG1.316.3	m.919	ENSDART00000122902.2	100	0.082	40.1
on.mrna.LG1.316.4	m.914	ENSDART00000122902.2	100	0.03	40.1
on.mrna.LG1.316.5	m.908	ENSDART00000149903.2	100	0.071	40.1
on.mrna.LG1.316.6	m.901	ENSDART00000149903.2	100	0.071	40.1
on.mrna.LG1.316.7	m.923	ENSDART00000122902.2	100	0.084	40.1
on.mrna.LG1.316.8	m.916	ENSDART00000122902.2	100	0.079	40.1
on.mrna.LG1.316.9	m.907	ENSDART00000122902.2	100	0.027	40.1
on.mrna.LG1.3160001.1	m.3419	ENSDART00000149903.2	100	0.025	40.1
on.mrna.LG1.317.1	m.160	ENSDART00000127351.2	82.87	3e-30	135
on.mrna.LG1.318.1	m.2959	ENSDART00000127131.2	84.25	7e-22	107
on.mrna.LG1.319.1	m.2464	ENSDART00000052539.6	81.97	0	1366
on.mrna.LG1.319.2	m.2473	ENSDART00000052539.6	81.97	0	1366
on.mrna.LG1.319.3	m.2470	ENSDART00000052539.6	81.97	0	1366
on.mrna.LG1.319.4	m.2461	ENSDART00000052539.6	81.97	0	1366
on.mrna.LG1.319.5	m.2467	ENSDART00000052539.6	81.97	0	1366
on.mrna.LG1.32.1	m.3404	ENSDART00000170935.2	80.45	4e-127	456
on.mrna.LG1.32.2	m.3405	ENSDART00000170935.2	80.45	4e-127	456
on.mrna.LG1.32.3	m.3403	ENSDART00000170935.2	80.45	4e-127	456
on.mrna.LG1.321.1	m.5410	ENSDART00000166046.1	81.71	1e-94	349
on.mrna.LG1.321.10	m.5431	ENSDART00000111626.3	82.65	7e-115	416
on.mrna.LG1.321.11	m.5443	ENSDART00000111626.3	88.84	1e-63	246
on.mrna.LG1.321.12	m.5425	ENSDART00000166046.1	82.66	5e-131	470
on.mrna.LG1.321.13	m.5437	ENSDART00000111626.3	82.65	7e-115	416
on.mrna.LG1.321.14	m.5413	ENSDART00000111626.3	88.84	1e-63	246
on.mrna.LG1.321.2	m.5434	ENSDART00000111626.3	81.55	2e-78	295
on.mrna.LG1.321.3	m.5419	ENSDART00000166046.1	81.71	1e-94	349
on.mrna.LG1.321.4	m.5440	ENSDART00000111626.3	79.78	4e-42	174
on.mrna.LG1.321.5	m.5428	ENSDART00000166046.1	80.78	1e-63	246
on.mrna.LG1.321.6	m.5422	ENSDART00000111626.3	79.78	4e-42	174
on.mrna.LG1.321.7	m.5446	ENSDART00000166046.1	80.78	1e-63	246
on.mrna.LG1.321.8	m.5449	ENSDART00000166046.1	82.66	5e-131	470
on.mrna.LG1.321.9	m.5416	ENSDART00000111626.3	79.78	4e-42	174
on.mrna.LG1.322.1	m.4908	ENSDART00000142818.3	80.85	8e-56	220
on.mrna.LG1.322.2	m.4911	ENSDART00000142818.3	80.73	3e-27	125
on.mrna.LG1.322.3	m.4914	ENSDART00000142818.3	80.85	8e-56	220
on.mrna.LG1.322.4	m.4905	ENSDART00000142818.3	80.85	8e-56	220
on.mrna.LG1.323.1	m.3674	ENSDART00000027466.9	81.88	0	644
on.mrna.LG1.323.2	m.3668	ENSDART00000027466.9	81.9	1e-152	541
on.mrna.LG1.323.3	m.3666	ENSDART00000027466.9	81.91	0	648
on.mrna.LG1.323.4	m.3671	ENSDART00000027466.9	81.9	1e-152	541
on.mrna.LG1.324.1	m.3139	ENSDART00000099639.7	80.65	2e-62	242
on.mrna.LG1.324.2	m.3136	ENSDART00000099639.7	80.65	2e-62	242
on.mrna.LG1.325.1	m.570	ENSDART00000075508.4	88.37	0.001	46.1
on.mrna.LG1.325.2	m.580	ENSDART00000075508.4	88.37	0.001	46.1
on.mrna.LG1.325.3	m.575	ENSDART00000075508.4	88.37	0.001	46.1
on.mrna.LG1.327.1	m.4305	ENSDART00000075513.6	81	0.0002	48.1
on.mrna.LG1.327.2	m.4309	ENSDART00000075513.6	81	0.0002	48.1
on.mrna.LG1.327.3	m.4311	ENSDART00000075513.6	81	0.0002	48.1
on.mrna.LG1.327.4	m.4307	ENSDART00000075513.6	81	0.0002	48.1
on.mrna.LG1.328.1	m.1812	ENSDART00000075519.5	80.09	1e-173	611
on.mrna.LG1.328.2	m.1813	ENSDART00000075519.5	80.39	1e-167	591
on.mrna.LG1.329.1	m.940	ENSDART00000173057.1	95.83	0.019	40.1
on.mrna.LG1.329.2	m.943	ENSDART00000108782.4	100	0.002	44.1
on.mrna.LG1.329.2	m.944	ENSDART00000173057.1	95.83	0.019	40.1
on.mrna.LG1.329.3	m.941	ENSDART00000108782.4	79.7	4e-05	50.1
on.mrna.LG1.329.3	m.942	ENSDART00000173057.1	95.83	0.019	40.1
on.mrna.LG1.329.4	m.938	ENSDART00000108782.4	100	0.002	44.1
on.mrna.LG1.329.4	m.939	ENSDART00000173057.1	95.83	0.019	40.1
on.mrna.LG1.3290001.1	m.3018	ENSDART00000110265.4	85.71	3e-36	155
on.mrna.LG1.33.1	m.4083	ENSDART00000047208.7	78.85	5e-54	214
on.mrna.LG1.33.10	m.4117	ENSDART00000173673.1	81.9	4e-142	507
on.mrna.LG1.33.11	m.4090	ENSDART00000173673.1	82.9	6e-178	626
on.mrna.LG1.33.12	m.4096	ENSDART00000173673.1	83.04	0	680
on.mrna.LG1.33.13	m.4085	ENSDART00000047208.7	80.77	2e-107	392
on.mrna.LG1.33.14	m.4108	ENSDART00000173673.1	82.9	6e-178	626
on.mrna.LG1.33.15	m.4093	ENSDART00000173673.1	82.9	4e-178	626
on.mrna.LG1.33.16	m.4126	ENSDART00000173673.1	81.65	3e-126	454
on.mrna.LG1.33.17	m.4073	ENSDART00000047208.7	83.18	0	698
on.mrna.LG1.33.18	m.4080	ENSDART00000047208.7	80.77	1e-107	392
on.mrna.LG1.33.19	m.4114	ENSDART00000173673.1	81.9	3e-142	507
on.mrna.LG1.33.2	m.4088	ENSDART00000047208.7	78.85	5e-54	214
on.mrna.LG1.33.20	m.4105	ENSDART00000047208.7	83.18	0	698
on.mrna.LG1.33.21	m.4099	ENSDART00000047208.7	80.77	1e-107	392
on.mrna.LG1.33.22	m.4129	ENSDART00000173673.1	81.9	3e-142	507
on.mrna.LG1.33.3	m.4067	ENSDART00000047208.7	78.35	9e-96	353
on.mrna.LG1.33.4	m.4123	ENSDART00000047208.7	78.85	6e-54	214
on.mrna.LG1.33.5	m.4120	ENSDART00000047208.7	78.85	6e-54	214
on.mrna.LG1.33.6	m.4076	ENSDART00000047208.7	78.85	6e-54	214
on.mrna.LG1.33.7	m.4111	ENSDART00000047208.7	83.18	0	698
on.mrna.LG1.33.8	m.4070	ENSDART00000047208.7	83.18	0	698
on.mrna.LG1.33.9	m.4102	ENSDART00000047208.7	80.77	2e-107	392
on.mrna.LG1.330.1	m.554	ENSDART00000129769.3	86.79	4e-49	198
on.mrna.LG1.330.2	m.552	ENSDART00000129769.3	86.79	4e-49	198
on.mrna.LG1.330.3	m.550	ENSDART00000129769.3	86.79	4e-49	198
on.mrna.LG1.331.1	m.4975	ENSDART00000131282.2	82.84	6e-90	333
on.mrna.LG1.331.10	m.4994	ENSDART00000009938.10	84.97	6e-58	226
on.mrna.LG1.331.2	m.4985	ENSDART00000131282.2	82.84	5e-90	333
on.mrna.LG1.331.3	m.5002	ENSDART00000131282.2	82.84	6e-90	333
on.mrna.LG1.331.4	m.4980	ENSDART00000131282.2	82.84	5e-90	333
on.mrna.LG1.331.5	m.5007	ENSDART00000131282.2	82.84	6e-90	333
on.mrna.LG1.331.6	m.5012	ENSDART00000131282.2	82.84	6e-90	333
on.mrna.LG1.331.7	m.5017	ENSDART00000009938.10	82.59	7e-92	339
on.mrna.LG1.331.8	m.4990	ENSDART00000009938.10	82.59	6e-92	339
on.mrna.LG1.331.9	m.4998	ENSDART00000009938.10	82.59	7e-92	339
on.mrna.LG1.332.1	m.1672	ENSDART00000110906.4	80.43	3e-49	198
on.mrna.LG1.332.2	m.1669	ENSDART00000110906.4	80.43	2e-49	198
on.mrna.LG1.332.3	m.1668	ENSDART00000110906.4	80.43	3e-49	198
on.mrna.LG1.332.4	m.1667	ENSDART00000110906.4	85.43	1e-27	125
on.mrna.LG1.332.5	m.1674	ENSDART00000110906.4	80.43	2e-49	198
on.mrna.LG1.332.6	m.1675	ENSDART00000110906.4	80.43	2e-49	198
on.mrna.LG1.332.7	m.1670	ENSDART00000110906.4	80.43	2e-49	198
on.mrna.LG1.332.8	m.1671	ENSDART00000110906.4	80.43	2e-49	198
on.mrna.LG1.332.9	m.1673	ENSDART00000110906.4	80.43	2e-49	198
on.mrna.LG1.333.1	m.3775	ENSDART00000127006.2	84.56	7e-24	113
on.mrna.LG1.333.1	m.3776	ENSDART00000127006.2	84.56	6e-24	113
on.mrna.LG1.334.1	m.3179	ENSDART00000144757.2	100	0.21	38.2
on.mrna.LG1.334.2	m.3182	ENSDART00000144757.2	100	0.26	38.2
on.mrna.LG1.334.3	m.3176	ENSDART00000144757.2	100	0.21	38.2
on.mrna.LG1.335.1	m.2394	ENSDART00000166834.1	87.88	7e-20	101
on.mrna.LG1.335.2	m.2390	ENSDART00000166834.1	84.62	2e-10	69.9
on.mrna.LG1.335.3	m.2386	ENSDART00000166834.1	84.62	2e-10	69.9
on.mrna.LG1.335.4	m.2382	ENSDART00000166834.1	84.62	2e-10	69.9
on.mrna.LG1.336.1	m.3917	ENSDART00000159464.1	80.6	4e-110	400
on.mrna.LG1.336.2	m.3916	ENSDART00000159464.1	80.6	4e-110	400
on.mrna.LG1.3360001.1	m.3486	ENSDART00000156894.1	100	0.47	38.2
on.mrna.LG1.3360001.1	m.3487	ENSDART00000149625.2	100	4.4	34.2
on.mrna.LG1.3360001.1	m.3489	ENSDART00000149625.2	100	2.9	34.2
on.mrna.LG1.337.1	m.114	ENSDART00000162748.1	84.78	7e-22	107
on.mrna.LG1.337.2	m.102	ENSDART00000162748.1	84.78	6e-22	107
on.mrna.LG1.337.3	m.108	ENSDART00000162748.1	84.78	7e-22	107
on.mrna.LG1.337.4	m.126	ENSDART00000162748.1	84.78	7e-22	107
on.mrna.LG1.337.5	m.90	ENSDART00000162748.1	84.78	7e-22	107
on.mrna.LG1.337.6	m.120	ENSDART00000162748.1	84.78	6e-22	107
on.mrna.LG1.337.7	m.132	ENSDART00000162748.1	84.78	7e-22	107
on.mrna.LG1.337.8	m.96	ENSDART00000162748.1	84.78	6e-22	107
on.mrna.LG1.338.1	m.563	ENSDART00000158363.1	85	1e-13	79.8
on.mrna.LG1.338.2	m.567	ENSDART00000158363.1	85	1e-13	79.8
on.mrna.LG1.339.1	m.49	ENSDART00000165301.1	84.93	3e-72	272
on.mrna.LG1.339.2	m.46	ENSDART00000165301.1	84.3	4e-78	291
on.mrna.LG1.339.3	m.45	ENSDART00000165301.1	84.3	6e-78	291
on.mrna.LG1.339.4	m.47	ENSDART00000159775.1	84.81	3e-27	123
on.mrna.LG1.339.5	m.48	ENSDART00000159775.1	84.65	8e-43	174
on.mrna.LG1.34.1	m.4474	ENSDART00000052471.4	86.57	1e-08	61.9
on.mrna.LG1.34.2	m.4472	ENSDART00000173798.1	77.97	2e-27	125
on.mrna.LG1.34.3	m.4475	ENSDART00000173798.1	77.45	8e-14	79.8
on.mrna.LG1.34.4	m.4479	ENSDART00000052471.4	83.7	3e-09	63.9
on.mrna.LG1.34.5	m.4470	ENSDART00000173798.1	77.97	2e-27	125
on.mrna.LG1.34.6	m.4469	ENSDART00000052471.4	83.7	3e-09	63.9
on.mrna.LG1.34.7	m.4480	ENSDART00000052471.4	83.7	3e-09	63.9
on.mrna.LG1.34.8	m.4477	ENSDART00000173798.1	77.97	2e-27	125
on.mrna.LG1.34.9	m.4468	ENSDART00000052471.4	83.7	3e-09	63.9
on.mrna.LG1.341.1	m.5587	ENSDART00000136657.3	85.94	9e-07	56
on.mrna.LG1.341.10	m.5592	ENSDART00000136657.3	85.94	1e-06	56
on.mrna.LG1.341.11	m.5584	ENSDART00000136657.3	85.94	1e-06	56
on.mrna.LG1.341.12	m.5594	ENSDART00000136657.3	85.94	1e-06	56
on.mrna.LG1.341.13	m.5580	ENSDART00000136657.3	85.94	1e-06	56
on.mrna.LG1.341.14	m.5595	ENSDART00000136657.3	85.94	1e-06	56
on.mrna.LG1.341.15	m.5599	ENSDART00000136657.3	85.94	1e-06	56
on.mrna.LG1.341.16	m.5589	ENSDART00000136657.3	85.94	1e-06	56
on.mrna.LG1.341.17	m.5591	ENSDART00000136657.3	93.33	0.002	44.1
on.mrna.LG1.341.2	m.5588	ENSDART00000136657.3	85.94	9e-07	56
on.mrna.LG1.341.3	m.5598	ENSDART00000136657.3	85.94	1e-06	56
on.mrna.LG1.341.4	m.5579	ENSDART00000136657.3	85.94	1e-06	56
on.mrna.LG1.341.5	m.5582	ENSDART00000136657.3	85.94	1e-06	56
on.mrna.LG1.341.6	m.5597	ENSDART00000136657.3	85.94	1e-06	56
on.mrna.LG1.341.7	m.5585	ENSDART00000136657.3	85.94	1e-06	56
on.mrna.LG1.341.8	m.5600	ENSDART00000136657.3	85.94	1e-06	56
on.mrna.LG1.341.9	m.5586	ENSDART00000136657.3	85.94	1e-06	56
on.mrna.LG1.342.1	m.4793	ENSDART00000089549.6	93.33	0.003	44.1
on.mrna.LG1.342.2	m.4798	ENSDART00000089549.6	87.01	4e-12	73.8
on.mrna.LG1.342.3	m.4805	ENSDART00000089549.6	87.01	8e-12	73.8
on.mrna.LG1.342.4	m.4794	ENSDART00000089549.6	87.01	8e-12	73.8
on.mrna.LG1.342.5	m.4800	ENSDART00000089549.6	87.01	8e-12	73.8
on.mrna.LG1.342.6	m.4803	ENSDART00000089549.6	87.01	8e-12	73.8
on.mrna.LG1.342.7	m.4796	ENSDART00000089549.6	87.01	6e-12	73.8
on.mrna.LG1.343.1	m.3845	ENSDART00000079139.3	82.68	6e-158	559
on.mrna.LG1.343.2	m.3841	ENSDART00000079139.3	82.68	5e-158	559
on.mrna.LG1.344.1	m.2536	ENSDART00000023721.7	84.41	1e-117	426
on.mrna.LG1.345.1	m.2063	ENSDART00000052345.5	82.02	5e-05	50.1
on.mrna.LG1.346.1	m.996	ENSDART00000149685.2	82.35	8e-177	620
on.mrna.LG1.347.1	m.5527	ENSDART00000076425.4	81.15	7e-28	127
on.mrna.LG1.347.2	m.5530	ENSDART00000076425.4	81.15	7e-28	127
on.mrna.LG1.347.3	m.5525	ENSDART00000076425.4	91.57	2e-22	109
on.mrna.LG1.348.1	m.407	ENSDART00000033118.5	100	1.8	34.2
on.mrna.LG1.348.2	m.404	ENSDART00000046663.7	100	0.76	36.2
on.mrna.LG1.348.3	m.410	ENSDART00000046663.7	100	0.93	36.2
on.mrna.LG1.348.4	m.405	ENSDART00000149903.2	100	0.057	40.1
on.mrna.LG1.348.5	m.408	ENSDART00000149903.2	100	0.077	40.1
on.mrna.LG1.349.1	m.1648	ENSDART00000020923.8	100	0.25	38.2
on.mrna.LG1.349.2	m.1645	ENSDART00000020923.8	100	0.25	38.2
on.mrna.LG1.349.3	m.1651	ENSDART00000020923.8	100	0.25	38.2
on.mrna.LG1.35.1	m.5523	ENSDART00000123498.3	82.61	2e-86	319
on.mrna.LG1.350.1	m.4300	ENSDART00000052342.4	81.71	3e-31	137
on.mrna.LG1.350001.1	m.2637	ENSDART00000123498.3	82.61	2e-86	319
on.mrna.LG1.352.1	m.199	ENSDART00000052805.3	81.56	9e-12	73.8
on.mrna.LG1.353.1	m.2305	ENSDART00000060160.4	79.15	2e-69	264
on.mrna.LG1.353.2	m.2306	ENSDART00000060160.4	79.46	7e-50	198
on.mrna.LG1.354.1	m.3829	ENSDART00000060166.4	79.63	1e-120	434
on.mrna.LG1.354.2	m.3827	ENSDART00000060166.4	79.63	1e-120	434
on.mrna.LG1.354.3	m.3828	ENSDART00000060166.4	81.05	4e-114	412
on.mrna.LG1.355.1	m.3052	ENSDART00000026571.6	77.82	4e-19	97.6
on.mrna.LG1.355.2	m.3049	ENSDART00000026571.6	77.82	4e-19	97.6
on.mrna.LG1.355.3	m.3055	ENSDART00000026571.6	77.82	3e-19	97.6
on.mrna.LG1.356.1	m.3581	ENSDART00000073846.4	80.94	2e-29	131
on.mrna.LG1.356.2	m.3582	ENSDART00000073846.4	80.94	3e-29	131
on.mrna.LG1.357.1	m.302	ENSDART00000080904.6	100	0.045	40.1
on.mrna.LG1.357.2	m.306	ENSDART00000080904.6	100	0.051	40.1
on.mrna.LG1.357.3	m.305	ENSDART00000080904.6	100	0.051	40.1
on.mrna.LG1.357.4	m.309	ENSDART00000080904.6	100	0.045	40.1
on.mrna.LG1.357.5	m.311	ENSDART00000080904.6	100	0.045	40.1
on.mrna.LG1.357.6	m.307	ENSDART00000080904.6	100	0.047	40.1
on.mrna.LG1.357.7	m.303	ENSDART00000080904.6	100	0.047	40.1
on.mrna.LG1.358.1	m.4644	ENSDART00000163989.1	81.05	0.001	46.1
on.mrna.LG1.358.1	m.4645	ENSDART00000163989.1	80.85	0.005	44.1
on.mrna.LG1.358.2	m.4656	ENSDART00000163989.1	81.05	0.001	46.1
on.mrna.LG1.358.2	m.4657	ENSDART00000163989.1	80.85	0.005	44.1
on.mrna.LG1.358.3	m.4668	ENSDART00000163989.1	81.05	0.001	46.1
on.mrna.LG1.358.3	m.4669	ENSDART00000163989.1	80.85	0.005	44.1
on.mrna.LG1.358.4	m.4648	ENSDART00000163989.1	81.05	0.001	46.1
on.mrna.LG1.358.4	m.4649	ENSDART00000163989.1	80.85	0.005	44.1
on.mrna.LG1.358.5	m.4652	ENSDART00000163989.1	81.05	0.001	46.1
on.mrna.LG1.358.5	m.4653	ENSDART00000163989.1	80.85	0.005	44.1
on.mrna.LG1.358.6	m.4664	ENSDART00000163989.1	81.05	0.001	46.1
on.mrna.LG1.358.6	m.4665	ENSDART00000163989.1	80.85	0.005	44.1
on.mrna.LG1.358.7	m.4660	ENSDART00000163989.1	81.05	0.001	46.1
on.mrna.LG1.358.7	m.4661	ENSDART00000163989.1	80.85	0.005	44.1
on.mrna.LG1.359.1	m.2360	ENSDART00000172772.1	96.43	0.0002	48.1
on.mrna.LG1.36.1	m.2818	ENSDART00000173596.1	88.24	4e-06	54
on.mrna.LG1.36.2	m.2819	ENSDART00000173596.1	88.24	4e-06	54
on.mrna.LG1.36.3	m.2820	ENSDART00000173596.1	88.24	4e-06	54
on.mrna.LG1.360.1	m.4964	ENSDART00000091470.6	80.51	3e-93	345
on.mrna.LG1.361.1	m.2075	ENSDART00000023653.8	86.25	9e-12	71.9
on.mrna.LG1.362.1	m.3687	ENSDART00000053521.6	85.34	3e-37	157
on.mrna.LG1.362.2	m.3690	ENSDART00000053521.6	85.34	4e-37	157
on.mrna.LG1.362.3	m.3688	ENSDART00000053521.6	85.34	5e-37	157
on.mrna.LG1.362.4	m.3689	ENSDART00000053521.6	85.34	5e-37	157
on.mrna.LG1.362.5	m.3691	ENSDART00000053521.6	85.34	5e-37	157
on.mrna.LG1.363.1	m.2458	ENSDART00000041577.7	80.86	6e-48	194
on.mrna.LG1.363.2	m.2449	ENSDART00000041577.7	80.86	6e-48	194
on.mrna.LG1.363.3	m.2455	ENSDART00000041577.7	80.86	6e-48	194
on.mrna.LG1.363.4	m.2452	ENSDART00000041577.7	80.86	6e-48	194
on.mrna.LG1.364.1	m.1861	ENSDART00000166511.1	96.15	0.005	44.1
on.mrna.LG1.365.1	m.2336	ENSDART00000024034.6	95.83	0.052	40.1
on.mrna.LG1.366.1	m.2954	ENSDART00000110004.3	95.45	0.53	36.2
on.mrna.LG1.367.1	m.2163	ENSDART00000163471.1	91.18	0.001	44.1
on.mrna.LG1.368.1	m.2715	ENSDART00000039495.4	80.18	6e-18	91.7
on.mrna.LG1.369.1	m.3249	ENSDART00000159316.1	85.9	3e-10	67.9
on.mrna.LG1.3690001.1	m.2640	ENSDART00000023539.7	81.19	8e-40	165
on.mrna.LG1.37.1	m.3589	ENSDART00000111301.4	82.26	2e-51	204
on.mrna.LG1.37.2	m.3588	ENSDART00000111301.4	83.83	2e-25	117
on.mrna.LG1.37.3	m.3590	ENSDART00000111301.4	83.83	2e-25	117
on.mrna.LG1.370.1	m.1612	ENSDART00000138403.3	81.97	5e-10	67.9
on.mrna.LG1.370.2	m.1613	ENSDART00000138403.3	81.97	5e-10	67.9
on.mrna.LG1.3700001.1	m.359	ENSDART00000003210.7	84	3e-17	89.7
on.mrna.LG1.371.1	m.1844	ENSDART00000170285.1	79.31	2e-64	248
on.mrna.LG1.371.10	m.1841	ENSDART00000170285.1	80.32	7e-54	212
on.mrna.LG1.371.11	m.1846	ENSDART00000170285.1	80.73	6e-20	99.6
on.mrna.LG1.371.2	m.1842	ENSDART00000170285.1	79.31	1e-64	248
on.mrna.LG1.371.3	m.1843	ENSDART00000170285.1	79.31	2e-64	248
on.mrna.LG1.371.4	m.1845	ENSDART00000170285.1	79.31	1e-64	248
on.mrna.LG1.371.5	m.1838	ENSDART00000170285.1	79.31	1e-64	248
on.mrna.LG1.371.6	m.1839	ENSDART00000170285.1	80.32	8e-54	212
on.mrna.LG1.371.7	m.1840	ENSDART00000170285.1	80.73	6e-20	99.6
on.mrna.LG1.371.8	m.1837	ENSDART00000170285.1	79.31	1e-64	248
on.mrna.LG1.371.9	m.1847	ENSDART00000170285.1	80.73	6e-20	99.6
on.mrna.LG1.372.1	m.2588	ENSDART00000152240.1	83.18	1e-10	69.9
on.mrna.LG1.372.2	m.2593	ENSDART00000152240.1	83.18	1e-10	69.9
on.mrna.LG1.373.1	m.3085	ENSDART00000046792.7	100	4.1	32.2
on.mrna.LG1.374.1	m.3470	ENSDART00000099326.3	95	5e-09	63.9
on.mrna.LG1.374.2	m.3473	ENSDART00000099326.3	95	5e-09	63.9
on.mrna.LG1.374.3	m.3475	ENSDART00000099326.3	95	5e-09	63.9
on.mrna.LG1.374.4	m.3477	ENSDART00000099326.3	95	5e-09	63.9
on.mrna.LG1.374.5	m.3468	ENSDART00000099326.3	95	4e-09	63.9
on.mrna.LG1.375.1	m.3772	ENSDART00000012374.8	80.62	2e-66	254
on.mrna.LG1.376.1	m.3355	ENSDART00000078894.4	81.32	4e-31	137
on.mrna.LG1.376.2	m.3356	ENSDART00000078894.4	81.32	4e-31	137
on.mrna.LG1.377.1	m.5231	ENSDART00000078888.4	79.85	1e-37	159
on.mrna.LG1.377.2	m.5232	ENSDART00000078888.4	79.85	1e-37	159
on.mrna.LG1.378.1	m.4555	ENSDART00000028033.5	91.18	0.002	44.1
on.mrna.LG1.379.1	m.1272	ENSDART00000033746.6	81.88	8e-15	81.8
on.mrna.LG1.38.1	m.264	ENSDART00000052113.5	81.53	2e-24	115
on.mrna.LG1.380.1	m.3456	ENSDART00000165450.1	82.55	5e-39	165
on.mrna.LG1.380.2	m.3451	ENSDART00000165450.1	82.55	5e-39	165
on.mrna.LG1.380.3	m.3441	ENSDART00000165450.1	82.55	5e-39	165
on.mrna.LG1.380.4	m.3461	ENSDART00000165450.1	82.67	3e-40	168
on.mrna.LG1.380.5	m.3446	ENSDART00000165450.1	82.67	3e-40	168
on.mrna.LG1.380.6	m.3436	ENSDART00000140908.2	82.52	3e-15	85.7
on.mrna.LG1.3800002.1	m.3936	ENSDART00000012758.6	96.3	0.0008	46.1
on.mrna.LG1.3800003.1	m.5517	ENSDART00000019248.7	100	0.29	36.2
on.mrna.LG1.381.1	m.5542	ENSDART00000109705.3	95.65	0.21	38.2
on.mrna.LG1.382.1	m.4335	ENSDART00000099285.3	79.68	7e-25	117
on.mrna.LG1.382.2	m.4334	ENSDART00000099285.3	81.05	9e-12	73.8
on.mrna.LG1.3820001.1	m.298	ENSDART00000064080.5	93.75	0.0002	48.1
on.mrna.LG1.383.1	m.4323	ENSDART00000005847.8	100	0.34	38.2
on.mrna.LG1.383.2	m.4319	ENSDART00000005847.8	100	0.34	38.2
on.mrna.LG1.383.3	m.4325	ENSDART00000005847.8	100	0.27	38.2
on.mrna.LG1.383.4	m.4321	ENSDART00000005847.8	100	0.22	38.2
on.mrna.LG1.383.5	m.4317	ENSDART00000005847.8	100	0.22	38.2
on.mrna.LG1.384.1	m.5146	ENSDART00000025254.8	95.83	0.023	40.1
on.mrna.LG1.386.1	m.2067	ENSDART00000111861.3	88.52	6e-156	551
on.mrna.LG1.388.1	m.1220	ENSDART00000063832.5	100	1.1	34.2
on.mrna.LG1.389.1	m.4718	ENSDART00000089035.5	83.97	1e-17	93.7
on.mrna.LG1.389.10	m.4702	ENSDART00000089035.5	83.97	9e-18	93.7
on.mrna.LG1.389.11	m.4710	ENSDART00000089035.5	83.97	8e-18	93.7
on.mrna.LG1.389.2	m.4716	ENSDART00000089035.5	83.97	1e-17	93.7
on.mrna.LG1.389.3	m.4706	ENSDART00000089035.5	83.97	9e-18	93.7
on.mrna.LG1.389.4	m.4708	ENSDART00000089035.5	83.97	9e-18	93.7
on.mrna.LG1.389.5	m.4714	ENSDART00000089035.5	83.97	7e-18	93.7
on.mrna.LG1.389.6	m.4720	ENSDART00000089035.5	83.97	9e-18	93.7
on.mrna.LG1.389.7	m.4700	ENSDART00000089035.5	83.97	9e-18	93.7
on.mrna.LG1.389.8	m.4704	ENSDART00000089035.5	83.97	1e-17	93.7
on.mrna.LG1.389.9	m.4712	ENSDART00000089035.5	83.97	1e-17	93.7
on.mrna.LG1.39.1	m.2232	ENSDART00000083514.6	80.83	5e-40	167
on.mrna.LG1.39.2	m.2223	ENSDART00000083514.6	80.83	8e-40	167
on.mrna.LG1.39.3	m.2219	ENSDART00000083514.6	80.83	7e-40	167
on.mrna.LG1.39.4	m.2227	ENSDART00000083514.6	80.83	7e-40	167
on.mrna.LG1.390.1	m.41	ENSDART00000016983.9	81.58	9e-161	569
on.mrna.LG1.391.1	m.807	ENSDART00000132342.1	93.48	1e-09	67.9
on.mrna.LG1.391.2	m.800	ENSDART00000132342.1	93.48	1e-09	67.9
on.mrna.LG1.391.3	m.813	ENSDART00000132342.1	93.48	1e-09	67.9
on.mrna.LG1.392.1	m.153	ENSDART00000142336.1	81.69	2e-146	521
on.mrna.LG1.392.2	m.146	ENSDART00000142336.1	81.69	2e-146	521
on.mrna.LG1.393.1	m.5328	ENSDART00000025423.8	82.86	0	1138
on.mrna.LG1.393.2	m.5332	ENSDART00000025423.8	82.74	0	1146
on.mrna.LG1.393.3	m.5333	ENSDART00000025423.8	81.54	0	842
on.mrna.LG1.393.4	m.5326	ENSDART00000025423.8	81.95	0	827
on.mrna.LG1.393.5	m.5334	ENSDART00000025423.8	81.54	0	842
on.mrna.LG1.393.6	m.5330	ENSDART00000025423.8	81.64	0	835
on.mrna.LG1.393.7	m.5327	ENSDART00000025423.8	84.84	0	1051
on.mrna.LG1.393.8	m.5329	ENSDART00000025423.8	83.53	0	747
on.mrna.LG1.393.9	m.5331	ENSDART00000025423.8	82.74	0	1146
on.mrna.LG1.394.1	m.5279	ENSDART00000077341.4	95.74	4e-13	77.8
on.mrna.LG1.395.1	m.2690	ENSDART00000109948.3	89.02	5e-17	91.7
on.mrna.LG1.395.1	m.2691	ENSDART00000109948.3	93.06	9e-21	103
on.mrna.LG1.396.1	m.2093	ENSDART00000010256.5	83.05	0	686
on.mrna.LG1.397.1	m.1604	ENSDART00000146543.1	83.33	2e-73	278
on.mrna.LG1.397.2	m.1603	ENSDART00000146543.1	83.33	2e-73	278
on.mrna.LG1.398.1	m.585	ENSDART00000102363.4	80.92	6e-116	418
on.mrna.LG1.398.2	m.587	ENSDART00000102363.4	80.78	2e-96	353
on.mrna.LG1.399.1	m.5238	ENSDART00000165757.1	82.96	0	807
on.mrna.LG1.399.2	m.5234	ENSDART00000145946.3	83.39	0	829
on.mrna.LG1.399.3	m.5239	ENSDART00000165757.1	83.05	0	825
on.mrna.LG1.399.4	m.5236	ENSDART00000165774.1	82.43	4e-160	565
on.mrna.LG1.399.5	m.5237	ENSDART00000145946.3	83.48	0	846
on.mrna.LG1.399.6	m.5235	ENSDART00000165757.1	82.53	1e-160	567
on.mrna.LG1.399.7	m.5240	ENSDART00000145946.3	83.1	3e-167	589
on.mrna.LG1.4.1	m.5290	ENSDART00000052389.4	79.29	5e-70	268
on.mrna.LG1.40.1	m.3823	ENSDART00000157917.1	78.1	2e-54	216
on.mrna.LG1.400.1	m.945	ENSDART00000002498.8	78.5	1e-15	85.7
on.mrna.LG1.4000001.1	m.1003	ENSDART00000114062.3	79.15	4e-32	139
on.mrna.LG1.402.1	m.4390	ENSDART00000044705.6	80.62	1e-32	143
on.mrna.LG1.403.1	m.2555	ENSDART00000021949.10	100	0.62	36.2
on.mrna.LG1.403.2	m.2556	ENSDART00000021949.10	100	0.62	36.2
on.mrna.LG1.404.1	m.3924	ENSDART00000126475.2	82.14	4e-18	95.6
on.mrna.LG1.406.1	m.267	ENSDART00000001805.9	88.14	9e-08	61.9
on.mrna.LG1.407.1	m.4396	ENSDART00000131524.1	85.51	5e-07	58
on.mrna.LG1.407.1	m.4398	ENSDART00000131524.1	85.51	3e-07	58
on.mrna.LG1.407.2	m.4403	ENSDART00000131524.1	85.51	5e-07	58
on.mrna.LG1.407.2	m.4405	ENSDART00000131524.1	85.51	3e-07	58
on.mrna.LG1.408.1	m.1206	ENSDART00000111774.2	78.23	2e-48	196
on.mrna.LG1.408.2	m.1203	ENSDART00000111774.2	78.23	2e-48	196
on.mrna.LG1.4080001.1	m.2784	ENSDART00000137572.2	80.99	4e-28	125
on.mrna.LG1.4080001.2	m.2785	ENSDART00000137572.2	82.14	3e-38	159
on.mrna.LG1.409.1	m.3119	ENSDART00000078140.4	80.21	3e-108	392
on.mrna.LG1.409.2	m.3120	ENSDART00000078140.4	80.21	3e-108	392
on.mrna.LG1.41.1	m.4582	ENSDART00000038273.5	91.53	4e-13	77.8
on.mrna.LG1.41.2	m.4584	ENSDART00000038273.5	91.53	4e-13	77.8
on.mrna.LG1.41.3	m.4580	ENSDART00000038273.5	91.53	4e-13	77.8
on.mrna.LG1.410.1	m.2236	ENSDART00000089242.4	83.03	2e-21	105
on.mrna.LG1.411.1	m.931	ENSDART00000109753.4	100	0.087	38.2
on.mrna.LG1.413.1	m.5504	ENSDART00000057638.3	80.31	3e-123	444
on.mrna.LG1.413.2	m.5508	ENSDART00000057638.3	80.31	3e-123	444
on.mrna.LG1.414.1	m.4737	ENSDART00000003278.8	93.62	5e-11	69.9
on.mrna.LG1.415.1	m.4050	ENSDART00000057641.5	83.12	5e-05	50.1
on.mrna.LG1.417.1	m.352	ENSDART00000109798.3	88.61	3e-15	85.7
on.mrna.LG1.417.2	m.356	ENSDART00000109798.3	79.33	1e-15	87.7
on.mrna.LG1.417.3	m.354	ENSDART00000109798.3	79.33	1e-15	87.7
on.mrna.LG1.418.1	m.2629	ENSDART00000142738.1	83.01	1e-14	81.8
on.mrna.LG1.418.2	m.2633	ENSDART00000142738.1	83.01	1e-14	81.8
on.mrna.LG1.418.3	m.2635	ENSDART00000056512.5	92.11	1e-05	52
on.mrna.LG1.418.4	m.2631	ENSDART00000056512.5	92.11	9e-06	52
on.mrna.LG1.419.1	m.2032	ENSDART00000057651.5	84.34	9e-97	355
on.mrna.LG1.419.10	m.2039	ENSDART00000057651.5	94.35	4e-72	272
on.mrna.LG1.419.11	m.2031	ENSDART00000057651.5	82.08	3e-08	60
on.mrna.LG1.419.12	m.2043	ENSDART00000057651.5	82.4	2e-12	73.8
on.mrna.LG1.419.13	m.2034	ENSDART00000057651.5	88.24	0.37	36.2
on.mrna.LG1.419.2	m.2037	ENSDART00000057651.5	84.34	6e-97	355
on.mrna.LG1.419.3	m.2040	ENSDART00000057651.5	84.34	8e-97	355
on.mrna.LG1.419.4	m.2044	ENSDART00000057651.5	84.34	9e-97	355
on.mrna.LG1.419.5	m.2030	ENSDART00000057651.5	84.34	6e-97	355
on.mrna.LG1.419.6	m.2038	ENSDART00000057651.5	94.35	4e-72	272
on.mrna.LG1.419.7	m.2042	ENSDART00000057651.5	94.35	4e-72	272
on.mrna.LG1.419.8	m.2035	ENSDART00000057651.5	94.35	7e-72	272
on.mrna.LG1.419.9	m.2028	ENSDART00000057651.5	94.35	6e-72	272
on.mrna.LG1.42.1	m.5173	ENSDART00000065864.6	77.25	8e-56	220
on.mrna.LG1.42.2	m.5168	ENSDART00000065864.6	80.78	3e-74	281
on.mrna.LG1.42.3	m.5178	ENSDART00000065864.6	80.71	4e-89	331
on.mrna.LG1.420.1	m.1025	ENSDART00000089133.5	79.74	5e-75	283
on.mrna.LG1.420.2	m.1024	ENSDART00000089133.5	79.74	4e-75	283
on.mrna.LG1.421.1	m.4299	ENSDART00000066929.6	92.59	0.15	38.2
on.mrna.LG1.422.1	m.3568	ENSDART00000171605.1	100	0.11	40.1
on.mrna.LG1.422.2	m.3563	ENSDART00000171605.1	100	0.12	40.1
on.mrna.LG1.422.3	m.3565	ENSDART00000171605.1	100	0.12	40.1
on.mrna.LG1.423.1	m.3250	ENSDART00000006180.9	84.87	9e-46	186
on.mrna.LG1.424.1	m.2624	ENSDART00000133882.2	100	0.038	40.1
on.mrna.LG1.4240001.1	m.5460	ENSDART00000109665.2	80.2	6e-40	167
on.mrna.LG1.425.1	m.2272	ENSDART00000026476.4	85	4e-33	143
on.mrna.LG1.426.1	m.1697	ENSDART00000113498.3	96	0.016	42.1
on.mrna.LG1.426.2	m.1695	ENSDART00000113498.3	96	0.015	42.1
on.mrna.LG1.426.3	m.1696	ENSDART00000113498.3	96	0.011	42.1
on.mrna.LG1.427.1	m.5212	ENSDART00000016211.5	82.34	2e-78	293
on.mrna.LG1.427.2	m.5202	ENSDART00000016211.5	82.34	2e-78	293
on.mrna.LG1.427.3	m.5205	ENSDART00000016211.5	82.34	2e-78	293
on.mrna.LG1.427.4	m.5210	ENSDART00000016211.5	82.09	1e-53	210
on.mrna.LG1.427.5	m.5208	ENSDART00000016211.5	82.09	1e-53	210
on.mrna.LG1.428.1	m.1458	ENSDART00000171691.1	81.66	0	674
on.mrna.LG1.429.1	m.2205	ENSDART00000007231.5	82.08	5e-94	345
on.mrna.LG1.43.1	m.1980	ENSDART00000098842.4	83.09	3e-16	87.7
on.mrna.LG1.431.1	m.2217	ENSDART00000102563.4	78.59	5e-18	93.7
on.mrna.LG1.432.1	m.2761	ENSDART00000004420.8	83.39	5e-106	385
on.mrna.LG1.432.2	m.2757	ENSDART00000004420.8	83.39	5e-106	385
on.mrna.LG1.432.3	m.2759	ENSDART00000004420.8	83.9	5e-97	355
on.mrna.LG1.432.4	m.2756	ENSDART00000004420.8	83.39	5e-106	385
on.mrna.LG1.432.5	m.2758	ENSDART00000004420.8	83.77	4e-78	291
on.mrna.LG1.433.1	m.5275	ENSDART00000058628.4	87.23	0.0008	46.1
on.mrna.LG1.433.2	m.5277	ENSDART00000058628.4	87.23	0.0008	46.1
on.mrna.LG1.434.1	m.3198	ENSDART00000158825.1	91.89	0	1518
on.mrna.LG1.434.1	m.3199	ENSDART00000158825.1	91.89	0	1518
on.mrna.LG1.434.2	m.3200	ENSDART00000158825.1	91.89	0	1518
on.mrna.LG1.434.2	m.3201	ENSDART00000158825.1	91.89	0	1518
on.mrna.LG1.434.3	m.3196	ENSDART00000158825.1	92.89	0	1417
on.mrna.LG1.434.3	m.3197	ENSDART00000158825.1	92.89	0	1417
on.mrna.LG1.434.4	m.3202	ENSDART00000158825.1	91.89	0	1518
on.mrna.LG1.434.4	m.3203	ENSDART00000158825.1	91.89	0	1518
on.mrna.LG1.434.5	m.3204	ENSDART00000158825.1	91.89	0	1518
on.mrna.LG1.434.5	m.3205	ENSDART00000158825.1	91.89	0	1518
on.mrna.LG1.435.1	m.3128	ENSDART00000088005.4	79.43	7e-20	99.6
on.mrna.LG1.435.2	m.3127	ENSDART00000088005.4	83.21	8e-16	85.7
on.mrna.LG1.436.1	m.3516	ENSDART00000088005.4	84.42	2e-07	58
on.mrna.LG1.437.1	m.2024	ENSDART00000111303.4	100	0.017	44.1
on.mrna.LG1.437.2	m.2025	ENSDART00000101168.4	83.52	8e-08	61.9
on.mrna.LG1.438.1	m.2669	ENSDART00000136217.1	80.69	0	668
on.mrna.LG1.439.1	m.262	ENSDART00000020082.7	100	1	34.2
on.mrna.LG1.44.1	m.3479	ENSDART00000021605.6	77.75	2e-24	115
on.mrna.LG1.44.2	m.3480	ENSDART00000021605.6	77.75	2e-24	115
on.mrna.LG1.440.1	m.3081	ENSDART00000077459.5	81.19	4e-22	107
on.mrna.LG1.440.2	m.3082	ENSDART00000077459.5	79.24	2e-24	115
on.mrna.LG1.440.3	m.3080	ENSDART00000077459.5	81.19	3e-22	107
on.mrna.LG1.441.1	m.837	ENSDART00000135517.2	85.06	5e-10	69.9
on.mrna.LG1.442.1	m.1718	ENSDART00000046438.6	82.94	5e-22	107
on.mrna.LG1.443.1	m.3773	ENSDART00000109927.2	90	0.0002	48.1
on.mrna.LG1.444.1	m.4586	ENSDART00000048633.7	100	0.42	36.2
on.mrna.LG1.445.1	m.2930	ENSDART00000077418.5	81.89	3e-54	214
on.mrna.LG1.445.2	m.2927	ENSDART00000077418.5	81.89	3e-54	214
on.mrna.LG1.446.1	m.4697	ENSDART00000040066.6	95.83	0.064	40.1
on.mrna.LG1.446.2	m.4698	ENSDART00000130358.2	100	0.13	40.1
on.mrna.LG1.447.1	m.502	ENSDART00000087565.4	90.91	0.007	42.1
on.mrna.LG1.447.2	m.503	ENSDART00000097888.4	83.13	2e-06	54
on.mrna.LG1.448.1	m.1243	ENSDART00000087111.6	91.14	7e-20	101
on.mrna.LG1.448.10	m.1244	ENSDART00000087111.6	80.8	1e-20	103
on.mrna.LG1.448.2	m.1241	ENSDART00000087111.6	91.14	7e-20	101
on.mrna.LG1.448.3	m.1239	ENSDART00000087111.6	91.14	7e-20	101
on.mrna.LG1.448.4	m.1246	ENSDART00000087111.6	91.14	7e-20	101
on.mrna.LG1.448.5	m.1249	ENSDART00000087111.6	91.14	7e-20	101
on.mrna.LG1.448.6	m.1242	ENSDART00000087111.6	91.14	7e-20	101
on.mrna.LG1.448.7	m.1245	ENSDART00000087111.6	80.8	3e-20	103
on.mrna.LG1.448.8	m.1238	ENSDART00000087111.6	80.8	2e-20	103
on.mrna.LG1.448.9	m.1248	ENSDART00000087111.6	80.8	2e-20	103
on.mrna.LG1.449.1	m.2297	ENSDART00000073757.3	100	0.15	40.1
on.mrna.LG1.449.2	m.2299	ENSDART00000073757.3	100	0.13	40.1
on.mrna.LG1.45.1	m.5515	ENSDART00000007487.8	81.98	2e-72	274
on.mrna.LG1.45.2	m.5514	ENSDART00000007487.8	81.98	2e-72	274
on.mrna.LG1.45.3	m.5512	ENSDART00000007487.8	81.82	1e-63	244
on.mrna.LG1.45.4	m.5513	ENSDART00000007487.8	81.84	6e-65	248
on.mrna.LG1.450.1	m.5502	ENSDART00000046802.6	77.65	4e-22	107
on.mrna.LG1.451.1	m.5518	ENSDART00000101655.4	100	0.014	44.1
on.mrna.LG1.452.1	m.3540	ENSDART00000105236.4	83.64	0.43	38.2
on.mrna.LG1.452.1	m.3543	ENSDART00000013093.7	100	0.14	38.2
on.mrna.LG1.453.1	m.2103	ENSDART00000013170.8	82.2	2e-23	109
on.mrna.LG1.454.1	m.2639	ENSDART00000142833.1	100	4e-06	52
on.mrna.LG1.455.1	m.2301	ENSDART00000013170.8	100	0.031	42.1
on.mrna.LG1.456.1	m.2996	ENSDART00000170042.1	100	0.031	40.1
on.mrna.LG1.457.1	m.5359	ENSDART00000013170.8	86.54	0.0001	48.1
on.mrna.LG1.458.1	m.3850	ENSDART00000002641.7	100	0.005	42.1
on.mrna.LG1.459.1	m.4375	ENSDART00000013170.8	83.57	2e-18	95.6
on.mrna.LG1.46.1	m.4481	ENSDART00000164838.1	82.89	0.0005	48.1
on.mrna.LG1.460.1	m.2158	ENSDART00000115321.3	78.37	2e-37	161
on.mrna.LG1.461.1	m.3185	ENSDART00000090549.7	82.76	2e-18	95.6
on.mrna.LG1.461.2	m.3188	ENSDART00000121488.2	81.66	9e-17	89.7
on.mrna.LG1.461.3	m.3193	ENSDART00000121488.2	80.65	1e-20	103
on.mrna.LG1.461.4	m.3190	ENSDART00000121488.2	80.65	8e-21	103
on.mrna.LG1.462.1	m.3697	ENSDART00000127022.2	81.52	0.0001	48.1
on.mrna.LG1.463.1	m.2335	ENSDART00000147845.2	79.13	2e-79	297
on.mrna.LG1.464.1	m.4331	ENSDART00000086164.5	79.62	3e-107	391
on.mrna.LG1.464.2	m.4328	ENSDART00000086164.5	79.62	3e-107	391
on.mrna.LG1.465.1	m.771	ENSDART00000009104.5	85.28	7e-119	432
on.mrna.LG1.465.2	m.754	ENSDART00000009104.5	85.28	7e-119	432
on.mrna.LG1.469.1	m.2105	ENSDART00000076611.4	86.82	5e-27	123
on.mrna.LG1.47.1	m.4506	ENSDART00000161914.1	85.19	0.003	44.1
on.mrna.LG1.47.2	m.4509	ENSDART00000161914.1	85.19	0.003	44.1
on.mrna.LG1.47.3	m.4511	ENSDART00000045675.6	100	0.52	36.2
on.mrna.LG1.47.3	m.4512	ENSDART00000114208.3	100	1.3	34.2
on.mrna.LG1.470.1	m.2762	ENSDART00000104249.2	81.25	1e-46	190
on.mrna.LG1.471.1	m.3677	ENSDART00000104257.3	86.76	5e-66	254
on.mrna.LG1.471.2	m.3676	ENSDART00000104257.3	86.76	3e-66	254
on.mrna.LG1.471.3	m.3679	ENSDART00000104257.3	86.76	6e-66	254
on.mrna.LG1.471.4	m.3681	ENSDART00000104257.3	86.76	6e-66	254
on.mrna.LG1.4710001.1	m.1209	ENSDART00000006443.6	100	0.13	40.1
on.mrna.LG1.4710001.2	m.1210	ENSDART00000006443.6	100	0.13	40.1
on.mrna.LG1.472.1	m.1854	ENSDART00000075412.5	95.45	0.29	36.2
on.mrna.LG1.473.1	m.5083	ENSDART00000101861.5	100	2.7	34.2
on.mrna.LG1.475.1	m.3175	ENSDART00000109298.3	100	0.22	38.2
on.mrna.LG1.476.1	m.4567	ENSDART00000075646.3	82.47	2e-07	58
on.mrna.LG1.477.1	m.2156	ENSDART00000082087.5	79.14	2e-22	107
on.mrna.LG1.477.2	m.2155	ENSDART00000082087.5	79.14	2e-22	107
on.mrna.LG1.478.1	m.3154	ENSDART00000020233.8	80.47	2e-72	276
on.mrna.LG1.479.1	m.2856	ENSDART00000128722.1	81.3	3e-43	176
on.mrna.LG1.4790001.1	m.2714	ENSDART00000128722.1	88.28	3e-36	153
on.mrna.LG1.48.1	m.1253	ENSDART00000125733.3	83.16	2e-08	61.9
on.mrna.LG1.480.1	m.976	ENSDART00000109495.3	86.3	1e-09	65.9
on.mrna.LG1.482.1	m.4631	ENSDART00000074761.2	84.26	6e-38	159
on.mrna.LG1.482.2	m.4629	ENSDART00000074761.2	87.37	3e-18	93.7
on.mrna.LG1.483.1	m.3149	ENSDART00000110092.3	85.37	4e-40	168
on.mrna.LG1.485.1	m.2718	ENSDART00000039165.6	79.94	2e-68	260
on.mrna.LG1.4860001.1	m.2012	ENSDART00000058351.6	80.6	2e-08	60
on.mrna.LG1.487.1	m.1692	ENSDART00000012944.5	82.09	6e-74	280
on.mrna.LG1.487.2	m.1689	ENSDART00000012944.5	82.09	6e-74	280
on.mrna.LG1.488.1	m.185	ENSDART00000170659.1	78.24	2e-08	61.9
on.mrna.LG1.488.2	m.187	ENSDART00000170659.1	78.24	2e-08	61.9
on.mrna.LG1.4880001.1	m.2755	ENSDART00000102431.4	96.3	0.0004	46.1
on.mrna.LG1.489.1	m.5397	ENSDART00000009698.10	80.6	2e-83	311
on.mrna.LG1.489.2	m.5393	ENSDART00000009698.10	80.6	2e-83	311
on.mrna.LG1.489.3	m.5392	ENSDART00000009698.10	80.6	2e-83	311
on.mrna.LG1.489.4	m.5396	ENSDART00000009698.10	80.6	2e-83	311
on.mrna.LG1.489.5	m.5390	ENSDART00000009698.10	80.6	2e-83	311
on.mrna.LG1.489.6	m.5395	ENSDART00000009698.10	80.6	2e-83	311
on.mrna.LG1.489.7	m.5391	ENSDART00000009698.10	80.6	2e-83	311
on.mrna.LG1.489.8	m.5394	ENSDART00000009698.10	80.6	2e-83	311
on.mrna.LG1.49.1	m.301	ENSDART00000008277.7	100	1	34.2
on.mrna.LG1.490.1	m.1250	ENSDART00000073397.6	80.93	3e-108	394
on.mrna.LG1.491.1	m.5375	ENSDART00000085087.5	81.82	1e-07	60
on.mrna.LG1.4910001.1	m.2509	ENSDART00000040627.5	100	0.021	40.1
on.mrna.LG1.492.1	m.3498	ENSDART00000167286.1	79.39	4e-137	492
on.mrna.LG1.492.2	m.3507	ENSDART00000167286.1	79.39	4e-137	492
on.mrna.LG1.493.1	m.3981	ENSDART00000173453.1	89.42	0	973
on.mrna.LG1.493.2	m.3979	ENSDART00000173453.1	89.26	0	874
on.mrna.LG1.493.3	m.3983	ENSDART00000173453.1	89.4	0	872
on.mrna.LG1.493.4	m.3973	ENSDART00000173453.1	89.4	0	872
on.mrna.LG1.493.5	m.3977	ENSDART00000173453.1	89.53	0	704
on.mrna.LG1.493.6	m.3975	ENSDART00000173453.1	89.33	9e-173	607
on.mrna.LG1.494.1	m.1916	ENSDART00000075538.5	89.47	0.004	44.1
on.mrna.LG1.495.1	m.1834	ENSDART00000162784.1	92.11	2e-05	52
on.mrna.LG1.496.1	m.5128	ENSDART00000055936.4	80.85	1e-64	248
on.mrna.LG1.496.2	m.5124	ENSDART00000012862.8	79.85	6e-107	389
on.mrna.LG1.496.3	m.5126	ENSDART00000012862.8	80.08	2e-113	410
on.mrna.LG1.496.4	m.5130	ENSDART00000012862.8	80.81	1e-89	331
on.mrna.LG1.497.1	m.5577	ENSDART00000086190.5	78.86	3e-19	97.6
on.mrna.LG1.498.1	m.4696	ENSDART00000050230.5	79.96	2e-50	200
on.mrna.LG1.499.1	m.951	ENSDART00000008013.5	84.06	3e-104	379
on.mrna.LG1.5.1	m.4260	ENSDART00000100102.5	89.01	7e-21	101
on.mrna.LG1.50.1	m.141	ENSDART00000147464.3	100	0.54	38.2
on.mrna.LG1.500.1	m.531	ENSDART00000110843.3	84.92	3e-19	99.6
on.mrna.LG1.500.10	m.537	ENSDART00000110843.3	84.92	3e-19	99.6
on.mrna.LG1.500.11	m.543	ENSDART00000110843.3	84.92	3e-19	99.6
on.mrna.LG1.500.2	m.516	ENSDART00000110843.3	84.92	3e-19	99.6
on.mrna.LG1.500.3	m.522	ENSDART00000110843.3	84.92	3e-19	99.6
on.mrna.LG1.500.4	m.540	ENSDART00000110843.3	84.92	3e-19	99.6
on.mrna.LG1.500.5	m.534	ENSDART00000110843.3	84.92	3e-19	99.6
on.mrna.LG1.500.6	m.528	ENSDART00000110843.3	84.92	3e-19	99.6
on.mrna.LG1.500.7	m.519	ENSDART00000110843.3	84.92	3e-19	99.6
on.mrna.LG1.500.8	m.513	ENSDART00000110843.3	84.92	3e-19	99.6
on.mrna.LG1.500.9	m.525	ENSDART00000110843.3	84.92	3e-19	99.6
on.mrna.LG1.5000001.1	m.2066	ENSDART00000173020.1	100	0.089	38.2
on.mrna.LG1.5000002.1	m.2843	ENSDART00000023831.5	78.24	4e-47	190
on.mrna.LG1.501.1	m.1743	ENSDART00000113280.3	79.28	1e-25	119
on.mrna.LG1.502.1	m.549	ENSDART00000075588.5	89.47	0.004	44.1
on.mrna.LG1.503.1	m.2145	ENSDART00000109257.4	82.42	5e-144	513
on.mrna.LG1.503.2	m.2141	ENSDART00000109257.4	82.42	6e-144	513
on.mrna.LG1.504.1	m.3963	ENSDART00000002075.9	84.11	7e-23	109
on.mrna.LG1.504.2	m.3961	ENSDART00000058667.6	88.64	0.0002	48.1
on.mrna.LG1.505.1	m.561	ENSDART00000046689.6	87.84	6e-13	75.8
on.mrna.LG1.506.1	m.300	ENSDART00000004692.8	82.77	1e-111	404
on.mrna.LG1.507.1	m.4813	ENSDART00000002892.4	83.63	6e-93	343
on.mrna.LG1.507.2	m.4809	ENSDART00000002892.4	83.63	5e-93	343
on.mrna.LG1.507.3	m.4811	ENSDART00000002892.4	83.63	6e-93	343
on.mrna.LG1.507.4	m.4807	ENSDART00000002892.4	83.63	6e-93	343
on.mrna.LG1.507.5	m.4815	ENSDART00000002892.4	83.63	5e-93	343
on.mrna.LG1.508.1	m.952	ENSDART00000042074.7	81.88	1e-38	163
on.mrna.LG1.508.2	m.954	ENSDART00000042074.7	81.88	1e-38	163
on.mrna.LG1.508.3	m.953	ENSDART00000042074.7	81.88	1e-38	163
on.mrna.LG1.508.4	m.955	ENSDART00000042074.7	81.88	1e-38	163
on.mrna.LG1.51.1	m.862	ENSDART00000123887.2	81.74	1e-26	123
on.mrna.LG1.51.2	m.863	ENSDART00000123887.2	81.74	1e-26	123
on.mrna.LG1.51.3	m.861	ENSDART00000123887.2	81.74	1e-26	123
on.mrna.LG1.510.1	m.2046	ENSDART00000099511.3	83.4	1e-41	172
on.mrna.LG1.510.2	m.2050	ENSDART00000099511.3	83.4	1e-41	172
on.mrna.LG1.511.1	m.4921	ENSDART00000055567.4	92.86	3e-08	60
on.mrna.LG1.512.1	m.3103	ENSDART00000055567.4	87.32	5e-11	69.9
on.mrna.LG1.513.1	m.1731	ENSDART00000003913.9	100	1.4	36.2
on.mrna.LG1.513.10	m.1733	ENSDART00000003913.9	100	1.2	36.2
on.mrna.LG1.513.11	m.1739	ENSDART00000003913.9	100	1.2	36.2
on.mrna.LG1.513.2	m.1737	ENSDART00000003913.9	100	1.4	36.2
on.mrna.LG1.513.3	m.1723	ENSDART00000003913.9	100	1.3	36.2
on.mrna.LG1.513.4	m.1741	ENSDART00000003913.9	100	1.3	36.2
on.mrna.LG1.513.5	m.1727	ENSDART00000003913.9	100	1.4	36.2
on.mrna.LG1.513.6	m.1725	ENSDART00000003913.9	100	1.4	36.2
on.mrna.LG1.513.7	m.1729	ENSDART00000003913.9	100	1.4	36.2
on.mrna.LG1.513.8	m.1735	ENSDART00000003913.9	100	1.4	36.2
on.mrna.LG1.513.9	m.1721	ENSDART00000003913.9	100	1.3	36.2
on.mrna.LG1.514.1	m.4225	ENSDART00000148490.2	83.71	2e-26	123
on.mrna.LG1.514.10	m.4229	ENSDART00000088033.4	85.32	2e-16	89.7
on.mrna.LG1.514.10	m.4230	ENSDART00000148490.2	83.88	1e-177	624
on.mrna.LG1.514.11	m.4240	ENSDART00000088033.4	85.32	2e-16	89.7
on.mrna.LG1.514.11	m.4241	ENSDART00000148490.2	83.94	8e-176	618
on.mrna.LG1.514.12	m.4253	ENSDART00000148490.2	83.88	3e-177	624
on.mrna.LG1.514.2	m.4255	ENSDART00000148490.2	83.71	2e-26	123
on.mrna.LG1.514.3	m.4251	ENSDART00000148490.2	83.88	3e-177	624
on.mrna.LG1.514.4	m.4257	ENSDART00000148490.2	83.88	3e-177	624
on.mrna.LG1.514.5	m.4227	ENSDART00000148490.2	83.94	2e-175	618
on.mrna.LG1.514.6	m.4232	ENSDART00000148490.2	83.94	2e-175	618
on.mrna.LG1.514.7	m.4247	ENSDART00000148490.2	83.88	3e-177	624
on.mrna.LG1.514.8	m.4243	ENSDART00000148490.2	83.94	2e-175	618
on.mrna.LG1.514.9	m.4235	ENSDART00000148490.2	83.94	2e-175	618
on.mrna.LG1.515.1	m.2547	ENSDART00000122377.2	84.62	0.031	40.1
on.mrna.LG1.515.2	m.2544	ENSDART00000122377.2	84.62	0.031	40.1
on.mrna.LG1.515.3	m.2546	ENSDART00000122377.2	84.62	0.038	40.1
on.mrna.LG1.516.1	m.61	ENSDART00000077724.5	81.86	5e-89	329
on.mrna.LG1.516.2	m.62	ENSDART00000077724.5	81.71	5e-79	295
on.mrna.LG1.516.3	m.58	ENSDART00000077724.5	81.86	5e-89	329
on.mrna.LG1.516.4	m.60	ENSDART00000077724.5	81.86	5e-89	329
on.mrna.LG1.516.5	m.57	ENSDART00000077724.5	81.86	4e-89	329
on.mrna.LG1.517.1	m.4004	ENSDART00000133618.3	79.95	0	985
on.mrna.LG1.517.2	m.4010	ENSDART00000133618.3	79.95	0	985
on.mrna.LG1.517.3	m.4016	ENSDART00000133618.3	79.95	0	985
on.mrna.LG1.517.4	m.4022	ENSDART00000133618.3	79.95	0	985
on.mrna.LG1.518.1	m.3083	ENSDART00000041597.2	83.2	1e-34	147
on.mrna.LG1.519.1	m.2817	ENSDART00000059208.4	88.8	1e-31	137
on.mrna.LG1.519.2	m.2815	ENSDART00000059208.4	88.8	1e-31	137
on.mrna.LG1.519.3	m.2816	ENSDART00000059208.4	88.8	1e-31	137
on.mrna.LG1.519.4	m.2814	ENSDART00000059208.4	85.62	4e-31	135
on.mrna.LG1.520.1	m.4151	ENSDART00000059208.4	89.36	2e-06	54
on.mrna.LG1.521.1	m.1221	ENSDART00000127348.2	84.43	6e-18	93.7
on.mrna.LG1.521.2	m.1225	ENSDART00000127348.2	84.43	6e-18	93.7
on.mrna.LG1.522.1	m.1908	ENSDART00000164933.1	79.59	1e-31	141
on.mrna.LG1.522.2	m.1888	ENSDART00000157535.1	82.92	2e-77	293
on.mrna.LG1.522.3	m.1898	ENSDART00000157535.1	82.92	2e-77	293
on.mrna.LG1.523.1	m.4974	ENSDART00000012457.6	100	1.1	34.2
on.mrna.LG1.524.1	m.494	ENSDART00000113467.4	87.34	1e-12	77.8
on.mrna.LG1.525.1	m.3626	ENSDART00000058936.5	80.84	3e-33	143
on.mrna.LG1.526.1	m.4950	ENSDART00000006078.9	82.71	3e-97	357
on.mrna.LG1.527.1	m.2604	ENSDART00000014582.8	83.27	2e-44	180
on.mrna.LG1.527.2	m.2606	ENSDART00000014582.8	83.27	2e-44	180
on.mrna.LG1.528.1	m.2374	ENSDART00000033591.7	82.5	0.0002	48.1
on.mrna.LG1.528.2	m.2376	ENSDART00000033591.7	82.5	0.0002	48.1
on.mrna.LG1.528.3	m.2380	ENSDART00000033591.7	82.5	0.0002	48.1
on.mrna.LG1.528.4	m.2378	ENSDART00000033591.7	82.5	0.0002	48.1
on.mrna.LG1.529.1	m.1677	ENSDART00000098390.4	87.72	3e-07	58
on.mrna.LG1.529.2	m.1681	ENSDART00000098390.4	87.72	3e-07	58
on.mrna.LG1.529.3	m.1679	ENSDART00000098390.4	87.72	3e-07	58
on.mrna.LG1.53.1	m.138	ENSDART00000025635.8	100	0.59	36.2
on.mrna.LG1.531.1	m.2310	ENSDART00000166044.1	96	0.005	42.1
on.mrna.LG1.532.1	m.3086	ENSDART00000170663.2	87.39	4e-25	117
on.mrna.LG1.532.2	m.3096	ENSDART00000170663.2	87.39	3e-25	117
on.mrna.LG1.532.3	m.3088	ENSDART00000170663.2	83.65	2e-54	214
on.mrna.LG1.532.4	m.3093	ENSDART00000170663.2	83.65	2e-54	214
on.mrna.LG1.532.5	m.3090	ENSDART00000170663.2	83.65	2e-54	214
on.mrna.LG1.533.1	m.3701	ENSDART00000159481.2	81.69	5e-166	585
on.mrna.LG1.533.2	m.3700	ENSDART00000159481.2	81.54	5e-157	555
on.mrna.LG1.534.1	m.2101	ENSDART00000159299.1	81.69	3e-114	414
on.mrna.LG1.536.1	m.3747	ENSDART00000021372.5	83.65	7e-33	143
on.mrna.LG1.536.2	m.3744	ENSDART00000021372.5	83.65	7e-33	143
on.mrna.LG1.536.3	m.3750	ENSDART00000021372.5	83.65	6e-33	143
on.mrna.LG1.5360001.1	m.2696	ENSDART00000110774.2	84.62	8e-05	50.1
on.mrna.LG1.5360001.1	m.2697	ENSDART00000110774.2	84.62	7e-05	50.1
on.mrna.LG1.5360002.1	m.3058	ENSDART00000110774.2	84.62	9e-05	50.1
on.mrna.LG1.5360002.1	m.3059	ENSDART00000110774.2	84.62	8e-05	50.1
on.mrna.LG1.537.1	m.3369	ENSDART00000110774.2	83.72	1e-16	89.7
on.mrna.LG1.537.2	m.3370	ENSDART00000110774.2	83.72	1e-16	89.7
on.mrna.LG1.5370001.1	m.4690	ENSDART00000016750.9	86.84	2e-11	71.9
on.mrna.LG1.5370002.1	m.2213	ENSDART00000016750.9	86.84	2e-11	71.9
on.mrna.LG1.538.1	m.5296	ENSDART00000064403.6	78.15	1e-12	75.8
on.mrna.LG1.538.2	m.5300	ENSDART00000064403.6	78.15	1e-12	75.8
on.mrna.LG1.538.3	m.5298	ENSDART00000064403.6	78.15	1e-12	75.8
on.mrna.LG1.538.4	m.5294	ENSDART00000064403.6	79.77	8e-10	65.9
on.mrna.LG1.538.5	m.5292	ENSDART00000064403.6	79.77	8e-10	65.9
on.mrna.LG1.5380002.1	m.2530	ENSDART00000136140.2	84	2e-17	89.7
on.mrna.LG1.539.1	m.4463	ENSDART00000088249.5	93.67	2e-25	117
on.mrna.LG1.54.1	m.5055	ENSDART00000099988.4	82.09	2e-46	188
on.mrna.LG1.54.2	m.5057	ENSDART00000099988.4	82.09	2e-46	188
on.mrna.LG1.540.1	m.5226	ENSDART00000134144.1	92.31	2e-11	71.9
on.mrna.LG1.541.1	m.4513	ENSDART00000167229.1	82.35	0	654
on.mrna.LG1.541.10	m.4524	ENSDART00000170888.1	81.19	0	751
on.mrna.LG1.541.11	m.4516	ENSDART00000170888.1	81.19	0	751
on.mrna.LG1.541.12	m.4541	ENSDART00000170888.1	81.19	0	751
on.mrna.LG1.541.13	m.4553	ENSDART00000167229.1	80.68	0	688
on.mrna.LG1.541.2	m.4549	ENSDART00000170888.1	82.28	0	720
on.mrna.LG1.541.3	m.4537	ENSDART00000170888.1	82.28	0	720
on.mrna.LG1.541.4	m.4519	ENSDART00000170888.1	82.28	0	720
on.mrna.LG1.541.5	m.4533	ENSDART00000170888.1	82.28	0	720
on.mrna.LG1.541.6	m.4544	ENSDART00000167229.1	82.36	0	682
on.mrna.LG1.541.7	m.4546	ENSDART00000170888.1	82.28	0	720
on.mrna.LG1.541.8	m.4530	ENSDART00000167229.1	82.35	0	654
on.mrna.LG1.541.9	m.4527	ENSDART00000167229.1	82.35	0	654
on.mrna.LG1.542.1	m.1229	ENSDART00000067066.5	80.19	3e-88	327
on.mrna.LG1.544.1	m.1566	ENSDART00000161203.1	85.31	1e-33	145
on.mrna.LG1.544.2	m.1554	ENSDART00000161203.1	85.31	2e-33	145
on.mrna.LG1.544.3	m.1560	ENSDART00000161203.1	85.31	2e-33	145
on.mrna.LG1.544.4	m.1577	ENSDART00000161203.1	85.31	2e-33	145
on.mrna.LG1.544.5	m.1571	ENSDART00000161203.1	85.31	2e-33	145
on.mrna.LG1.546.1	m.4001	ENSDART00000079782.5	100	0.46	38.2
on.mrna.LG1.547.1	m.3466	ENSDART00000005053.10	81.67	0	728
on.mrna.LG1.548.1	m.5489	ENSDART00000074963.3	83.05	7e-24	113
on.mrna.LG1.548.2	m.5483	ENSDART00000074963.3	83.05	6e-24	113
on.mrna.LG1.548.3	m.5479	ENSDART00000074963.3	83.05	6e-24	113
on.mrna.LG1.548.4	m.5486	ENSDART00000074963.3	83.05	6e-24	113
on.mrna.LG1.548.5	m.5476	ENSDART00000074963.3	83.05	6e-24	113
on.mrna.LG1.548.6	m.5473	ENSDART00000074963.3	83.05	7e-24	113
on.mrna.LG1.549.1	m.4757	ENSDART00000026712.7	80.33	3e-131	470
on.mrna.LG1.549.2	m.4761	ENSDART00000026712.7	80.33	3e-131	470
on.mrna.LG1.55.1	m.4443	ENSDART00000074587.6	88.24	7e-17	89.7
on.mrna.LG1.55.2	m.4440	ENSDART00000074587.6	88.24	7e-17	89.7
on.mrna.LG1.550.1	m.3532	ENSDART00000045628.5	80.58	1e-62	242
on.mrna.LG1.550.2	m.3529	ENSDART00000045628.5	80.58	1e-62	242
on.mrna.LG1.550.3	m.3534	ENSDART00000045628.5	80.58	1e-62	242
on.mrna.LG1.550.4	m.3531	ENSDART00000045628.5	80.58	1e-62	242
on.mrna.LG1.554.1	m.4685	ENSDART00000043857.4	84.71	9e-139	494
on.mrna.LG1.554.2	m.4684	ENSDART00000043857.4	84.53	1e-148	527
on.mrna.LG1.555.1	m.5524	ENSDART00000162850.2	84.65	3e-146	519
on.mrna.LG1.556.1	m.333	ENSDART00000130028.3	88.71	2e-30	135
on.mrna.LG1.556.2	m.337	ENSDART00000130028.3	88.71	2e-30	135
on.mrna.LG1.556.3	m.335	ENSDART00000130028.3	88.71	2e-30	135
on.mrna.LG1.557.1	m.993	ENSDART00000029565.7	81.14	8e-75	281
on.mrna.LG1.557.2	m.994	ENSDART00000029565.7	81.14	8e-75	281
on.mrna.LG1.557.3	m.991	ENSDART00000029565.7	81.14	7e-75	281
on.mrna.LG1.557.4	m.995	ENSDART00000029565.7	80.85	6e-53	208
on.mrna.LG1.557.5	m.992	ENSDART00000029565.7	81.07	3e-39	163
on.mrna.LG1.558.1	m.3852	ENSDART00000027807.9	79.46	0	1126
on.mrna.LG1.559.1	m.2531	ENSDART00000047528.5	100	0.022	42.1
on.mrna.LG1.56.1	m.3770	ENSDART00000012241.9	81.13	1e-85	319
on.mrna.LG1.56.2	m.3766	ENSDART00000012241.9	81.13	1e-85	319
on.mrna.LG1.56.3	m.3769	ENSDART00000012241.9	80.93	2e-93	345
on.mrna.LG1.56.4	m.3771	ENSDART00000012241.9	80.93	2e-93	345
on.mrna.LG1.56.5	m.3767	ENSDART00000012241.9	80.93	2e-93	345
on.mrna.LG1.560.1	m.4063	ENSDART00000113342.4	80.95	1e-87	325
on.mrna.LG1.561.1	m.3109	ENSDART00000111842.4	81.85	9e-84	313
on.mrna.LG1.561.2	m.3113	ENSDART00000111842.4	83.55	1e-67	260
on.mrna.LG1.561.3	m.3105	ENSDART00000111842.4	81.85	1e-83	313
on.mrna.LG1.561.4	m.3116	ENSDART00000111842.4	83.55	1e-67	260
on.mrna.LG1.562.1	m.5357	ENSDART00000084249.5	80.09	1e-119	432
on.mrna.LG1.562.2	m.5347	ENSDART00000084249.5	80.09	1e-119	432
on.mrna.LG1.562.3	m.5353	ENSDART00000084249.5	80.09	1e-119	432
on.mrna.LG1.562.4	m.5349	ENSDART00000084249.5	80.09	1e-119	432
on.mrna.LG1.562.5	m.5343	ENSDART00000084249.5	80.09	8e-120	432
on.mrna.LG1.562.6	m.5345	ENSDART00000084249.5	80.09	8e-120	432
on.mrna.LG1.562.7	m.5351	ENSDART00000084249.5	80.09	7e-120	432
on.mrna.LG1.562.8	m.5355	ENSDART00000084249.5	80.09	6e-120	432
on.mrna.LG1.5620001.1	m.3825	ENSDART00000052380.5	86.27	0.003	46.1
on.mrna.LG1.5620001.2	m.3826	ENSDART00000052380.5	86.27	0.003	46.1
on.mrna.LG1.5620002.1	m.501	ENSDART00000067762.6	100	1.6	34.2
on.mrna.LG1.563.1	m.4389	ENSDART00000052379.6	79.23	8e-48	192
on.mrna.LG1.564.1	m.2447	ENSDART00000143300.2	82.98	1e-16	89.7
on.mrna.LG1.565.1	m.2100	ENSDART00000143300.2	80.82	1e-10	67.9
on.mrna.LG1.566.1	m.4147	ENSDART00000084266.5	82.3	2e-103	379
on.mrna.LG1.566.2	m.4149	ENSDART00000084266.5	82.3	2e-103	379
on.mrna.LG1.567.1	m.3517	ENSDART00000084282.6	79.47	2e-60	236
on.mrna.LG1.569.1	m.3960	ENSDART00000134177.1	92.5	8e-07	56
on.mrna.LG1.57.1	m.4215	ENSDART00000045679.8	83.42	0	733
on.mrna.LG1.57.2	m.4211	ENSDART00000045679.8	83.52	0	668
on.mrna.LG1.57.3	m.4209	ENSDART00000045679.8	83.42	0	733
on.mrna.LG1.57.4	m.4217	ENSDART00000045679.8	83.52	0	668
on.mrna.LG1.57.5	m.4220	ENSDART00000045679.8	83.42	0	733
on.mrna.LG1.57.6	m.4218	ENSDART00000045679.8	83.52	0	668
on.mrna.LG1.57.7	m.4210	ENSDART00000045679.8	83.42	0	733
on.mrna.LG1.57.8	m.4216	ENSDART00000045679.8	83.42	0	733
on.mrna.LG1.57.9	m.4213	ENSDART00000045679.8	83.42	0	733
on.mrna.LG1.570.1	m.3427	ENSDART00000169974.1	89.23	5e-12	73.8
on.mrna.LG1.570.2	m.3425	ENSDART00000169974.1	89.23	5e-12	73.8
on.mrna.LG1.570.3	m.3429	ENSDART00000169974.1	89.23	5e-12	73.8
on.mrna.LG1.571.1	m.4222	ENSDART00000157564.1	85.04	1e-127	458
on.mrna.LG1.572.1	m.3299	ENSDART00000162513.1	80.97	1e-132	474
on.mrna.LG1.572.2	m.3296	ENSDART00000162513.1	80.59	0	646
on.mrna.LG1.573.1	m.4159	ENSDART00000164374.1	82.03	3e-102	375
on.mrna.LG1.573.2	m.4163	ENSDART00000164374.1	82.03	3e-102	375
on.mrna.LG1.573.3	m.4157	ENSDART00000164374.1	82.03	3e-102	375
on.mrna.LG1.573.4	m.4161	ENSDART00000162633.1	82.75	1e-63	246
on.mrna.LG1.573.5	m.4156	ENSDART00000162633.1	82.75	2e-63	246
on.mrna.LG1.573.6	m.4162	ENSDART00000162633.1	82.75	1e-63	246
on.mrna.LG1.574.1	m.2257	ENSDART00000157434.1	84	1e-27	125
on.mrna.LG1.574.2	m.2249	ENSDART00000157434.1	84	2e-27	125
on.mrna.LG1.574.3	m.2253	ENSDART00000157434.1	84	2e-27	125
on.mrna.LG1.575.1	m.2520	ENSDART00000109605.3	86.41	1e-17	93.7
on.mrna.LG1.575.2	m.2525	ENSDART00000109605.3	87.32	3e-31	139
on.mrna.LG1.575.3	m.2522	ENSDART00000109605.3	87.32	3e-31	139
on.mrna.LG1.576.1	m.486	ENSDART00000142665.2	82.14	7e-121	434
on.mrna.LG1.576.2	m.485	ENSDART00000142665.2	82.14	8e-121	434
on.mrna.LG1.576.3	m.487	ENSDART00000142665.2	82.14	8e-121	434
on.mrna.LG1.576.4	m.484	ENSDART00000142665.2	82.14	8e-121	434
on.mrna.LG1.577.1	m.1284	ENSDART00000114448.2	85.92	2e-08	61.9
on.mrna.LG1.577.2	m.1283	ENSDART00000114448.2	85.92	2e-08	61.9
on.mrna.LG1.578.1	m.4621	ENSDART00000005299.9	100	0.025	42.1
on.mrna.LG1.578.1	m.4622	ENSDART00000005299.9	100	0.017	42.1
on.mrna.LG1.579.1	m.5087	ENSDART00000171881.1	79.1	1e-59	232
on.mrna.LG1.58.1	m.3555	ENSDART00000074729.5	81.66	1e-52	210
on.mrna.LG1.58.2	m.3558	ENSDART00000074729.5	81.66	1e-52	210
on.mrna.LG1.58.3	m.3552	ENSDART00000074729.5	81.66	1e-52	210
on.mrna.LG1.580.1	m.4751	ENSDART00000110287.3	100	0.62	36.2
on.mrna.LG1.581.1	m.1660	ENSDART00000114158.3	91.43	0.003	46.1
on.mrna.LG1.582.1	m.450	ENSDART00000158040.1	82.18	7e-37	157
on.mrna.LG1.583.1	m.2776	ENSDART00000034523.7	84.87	9e-26	119
on.mrna.LG1.583.2	m.2778	ENSDART00000034523.7	81.72	2e-36	155
on.mrna.LG1.583.3	m.2781	ENSDART00000034523.7	81.05	0.001	46.1
on.mrna.LG1.583.4	m.2777	ENSDART00000034523.7	77.96	2e-40	168
on.mrna.LG1.583.5	m.2774	ENSDART00000165180.1	83.14	2e-39	165
on.mrna.LG1.583.6	m.2772	ENSDART00000165180.1	79.56	5e-109	396
on.mrna.LG1.583.7	m.2770	ENSDART00000165180.1	79.49	4e-116	420
on.mrna.LG1.583.8	m.2768	ENSDART00000165180.1	78.9	2e-55	218
on.mrna.LG1.583.9	m.2779	ENSDART00000165180.1	79.61	2e-80	301
on.mrna.LG1.584.1	m.826	ENSDART00000003418.9	100	0.005	44.1
on.mrna.LG1.584.2	m.825	ENSDART00000003418.9	100	0.004	44.1
on.mrna.LG1.584.3	m.824	ENSDART00000003418.9	100	0.005	44.1
on.mrna.LG1.584.4	m.827	ENSDART00000003418.9	100	0.005	44.1
on.mrna.LG1.5840001.1	m.3685	ENSDART00000172459.1	100	0.16	38.2
on.mrna.LG1.585.1	m.1974	ENSDART00000121503.2	79.86	1e-31	137
on.mrna.LG1.587.1	m.2999	ENSDART00000098076.4	80.82	3e-146	519
on.mrna.LG1.587.2	m.2997	ENSDART00000098076.4	80.82	3e-146	519
on.mrna.LG1.587.3	m.2998	ENSDART00000098076.4	80.82	3e-146	519
on.mrna.LG1.588.1	m.3034	ENSDART00000067373.4	81.72	9e-20	99.6
on.mrna.LG1.588.2	m.3033	ENSDART00000067373.4	81.72	1e-19	99.6
on.mrna.LG1.589.1	m.3598	ENSDART00000161538.1	82.05	2e-09	65.9
on.mrna.LG1.589.2	m.3597	ENSDART00000161538.1	82.24	2e-08	61.9
on.mrna.LG1.59.1	m.2480	ENSDART00000139441.1	80.55	8e-67	256
on.mrna.LG1.590.1	m.3285	ENSDART00000009393.7	100	0.004	44.1
on.mrna.LG1.591.1	m.2719	ENSDART00000108524.3	100	0.33	38.2
on.mrna.LG1.592.1	m.5258	ENSDART00000100286.3	100	1.7	34.2
on.mrna.LG1.593.1	m.4780	ENSDART00000113713.2	100	0.67	36.2
on.mrna.LG1.594.1	m.1608	ENSDART00000131482.1	100	1.2	34.2
on.mrna.LG1.595.1	m.331	ENSDART00000165603.1	82.35	2e-58	228
on.mrna.LG1.596.1	m.2846	ENSDART00000157801.1	83.78	2e-21	103
on.mrna.LG1.596.2	m.2848	ENSDART00000157801.1	83.78	2e-21	103
on.mrna.LG1.596.3	m.2854	ENSDART00000157801.1	83.78	2e-21	103
on.mrna.LG1.596.4	m.2852	ENSDART00000157801.1	83.78	2e-21	103
on.mrna.LG1.596.5	m.2850	ENSDART00000157801.1	83.78	2e-21	103
on.mrna.LG1.596.6	m.2844	ENSDART00000157801.1	90.32	0.1	38.2
on.mrna.LG1.597.1	m.266	ENSDART00000138087.1	84.13	2e-45	182
on.mrna.LG1.598.1	m.3882	ENSDART00000007584.7	85.76	1e-146	519
on.mrna.LG1.598.2	m.3890	ENSDART00000062738.6	83.5	3e-113	408
on.mrna.LG1.598.3	m.3885	ENSDART00000007584.7	88.76	3e-72	272
on.mrna.LG1.598.4	m.3887	ENSDART00000062738.6	83.3	4e-78	291
on.mrna.LG1.599.1	m.2241	ENSDART00000080160.6	87.02	1e-27	125
on.mrna.LG1.599.2	m.2239	ENSDART00000080160.6	87.02	1e-27	125
on.mrna.LG1.599.3	m.2243	ENSDART00000080160.6	83.33	2e-22	107
on.mrna.LG1.599.4	m.2240	ENSDART00000080160.6	83.33	2e-22	107
on.mrna.LG1.599.5	m.2242	ENSDART00000080160.6	83.33	2e-22	107
on.mrna.LG1.599.6	m.2237	ENSDART00000080160.6	87.02	1e-27	125
on.mrna.LG1.599.7	m.2238	ENSDART00000080160.6	87.02	1e-27	125
on.mrna.LG1.6.1	m.929	ENSDART00000162653.1	84.12	5e-27	123
on.mrna.LG1.6.2	m.927	ENSDART00000162653.1	84.12	7e-27	123
on.mrna.LG1.600.1	m.5387	ENSDART00000010189.6	84.62	4e-11	69.9
on.mrna.LG1.600.2	m.5377	ENSDART00000010189.6	84.62	4e-11	69.9
on.mrna.LG1.600.3	m.5380	ENSDART00000010189.6	79.62	9e-75	283
on.mrna.LG1.601.1	m.797	ENSDART00000109315.3	100	0.09	38.2
on.mrna.LG1.603.1	m.3699	ENSDART00000058339.6	82.85	4e-94	345
on.mrna.LG1.604.1	m.3283	ENSDART00000128183.3	85.58	8e-16	87.7
on.mrna.LG1.605.1	m.2957	ENSDART00000128183.3	81.03	1e-17	93.7
on.mrna.LG1.605.2	m.2955	ENSDART00000128183.3	81.03	1e-17	93.7
on.mrna.LG1.607.1	m.64	ENSDART00000124676.3	77.75	1e-35	153
on.mrna.LG1.607.2	m.76	ENSDART00000124676.3	77.75	1e-35	153
on.mrna.LG1.607.3	m.70	ENSDART00000124676.3	77.75	1e-35	153
on.mrna.LG1.608.1	m.5116	ENSDART00000031049.7	80.73	1e-30	137
on.mrna.LG1.608.2	m.5120	ENSDART00000031049.7	80.73	1e-30	137
on.mrna.LG1.609.1	m.4944	ENSDART00000091727.5	84.98	6e-41	170
on.mrna.LG1.61.1	m.3125	ENSDART00000090310.4	81.97	8e-120	432
on.mrna.LG1.6100001.1	m.4569	ENSDART00000123157.2	100	0.3	36.2
on.mrna.LG1.611.1	m.3367	ENSDART00000027331.9	83.93	0.048	40.1
on.mrna.LG1.611.2	m.3365	ENSDART00000027331.9	83.93	0.049	40.1
on.mrna.LG1.612.1	m.4642	ENSDART00000112980.4	86.49	1e-10	67.9
on.mrna.LG1.613.1	m.5653	ENSDART00000158517.2	82.04	0	975
on.mrna.LG1.613.2	m.5651	ENSDART00000158517.2	81.99	0	646
on.mrna.LG1.613.3	m.5655	ENSDART00000158517.2	81.99	0	646
on.mrna.LG1.613.4	m.5654	ENSDART00000158517.2	81.99	0	646
on.mrna.LG1.613.5	m.5652	ENSDART00000158517.2	82.04	0	975
on.mrna.LG1.614.1	m.477	ENSDART00000030919.6	86.44	3e-06	54
on.mrna.LG1.615.1	m.2731	ENSDART00000156832.2	78.54	2e-97	359
on.mrna.LG1.615.2	m.2726	ENSDART00000156832.2	78.54	2e-97	359
on.mrna.LG1.615.3	m.2721	ENSDART00000156832.2	79.86	4e-71	272
on.mrna.LG1.616.1	m.2702	ENSDART00000008808.8	81.15	2e-79	297
on.mrna.LG1.616.2	m.2704	ENSDART00000008808.8	81.15	2e-79	297
on.mrna.LG1.616.3	m.2706	ENSDART00000008808.8	81.14	9e-69	262
on.mrna.LG1.617.1	m.3820	ENSDART00000108712.3	87.66	2e-36	155
on.mrna.LG1.617.2	m.3818	ENSDART00000108712.3	87.66	3e-36	155
on.mrna.LG1.618.1	m.3344	ENSDART00000075743.5	80.18	1e-58	230
on.mrna.LG1.618.2	m.3329	ENSDART00000075743.5	80.18	9e-59	230
on.mrna.LG1.618.3	m.3326	ENSDART00000075743.5	84.6	6e-113	410
on.mrna.LG1.618.4	m.3335	ENSDART00000075743.5	84.6	5e-113	410
on.mrna.LG1.618.5	m.3338	ENSDART00000075743.5	81.23	0	757
on.mrna.LG1.618.6	m.3323	ENSDART00000075743.5	81.23	0	757
on.mrna.LG1.618.7	m.3332	ENSDART00000075743.5	81.23	0	757
on.mrna.LG1.618.8	m.3341	ENSDART00000075743.5	81.23	0	757
on.mrna.LG1.619.1	m.5304	ENSDART00000099984.3	81.3	6e-62	238
on.mrna.LG1.62.1	m.3703	ENSDART00000100104.3	82.46	6e-65	250
on.mrna.LG1.62.2	m.3708	ENSDART00000100104.3	85.71	0.0003	48.1
on.mrna.LG1.62.3	m.3702	ENSDART00000100104.3	90	6e-15	83.8
on.mrna.LG1.62.4	m.3706	ENSDART00000138103.1	86.67	1e-31	139
on.mrna.LG1.620.1	m.4606	ENSDART00000055567.4	80.2	0.012	42.1
on.mrna.LG1.621.1	m.3991	ENSDART00000083100.5	89.86	3e-14	81.8
on.mrna.LG1.621.2	m.3996	ENSDART00000083100.5	89.86	3e-14	81.8
on.mrna.LG1.622.1	m.559	ENSDART00000027242.5	80.39	4e-49	196
on.mrna.LG1.622.2	m.556	ENSDART00000027242.5	80.39	3e-49	196
on.mrna.LG1.623.1	m.5544	ENSDART00000109942.3	82.89	8e-25	117
on.mrna.LG1.623.2	m.5547	ENSDART00000109942.3	82.89	8e-25	117
on.mrna.LG1.623.3	m.5546	ENSDART00000109942.3	82.89	8e-25	117
on.mrna.LG1.623.4	m.5545	ENSDART00000109942.3	82.89	8e-25	117
on.mrna.LG1.623.5	m.5548	ENSDART00000109942.3	82.89	8e-25	117
on.mrna.LG1.624.1	m.2059	ENSDART00000005740.10	84.66	5e-77	289
on.mrna.LG1.624.2	m.2061	ENSDART00000005740.10	84.66	5e-77	289
on.mrna.LG1.626.1	m.3218	ENSDART00000087070.5	97.06	2e-07	60
on.mrna.LG1.626.2	m.3234	ENSDART00000087070.5	97.06	2e-07	60
on.mrna.LG1.626.3	m.3226	ENSDART00000087070.5	97.06	2e-07	60
on.mrna.LG1.628.1	m.5287	ENSDART00000000005.6	100	0.11	40.1
on.mrna.LG1.628.2	m.5281	ENSDART00000138669.2	95.24	5e-10	67.9
on.mrna.LG1.628.3	m.5284	ENSDART00000000005.6	100	0.11	40.1
on.mrna.LG1.628.4	m.5289	ENSDART00000000005.6	100	0.11	40.1
on.mrna.LG1.628.5	m.5288	ENSDART00000138669.2	95.24	5e-10	67.9
on.mrna.LG1.628.6	m.5282	ENSDART00000000005.6	100	0.12	40.1
on.mrna.LG1.628.7	m.5285	ENSDART00000138669.2	95.24	6e-10	67.9
on.mrna.LG1.629.1	m.4439	ENSDART00000010046.7	82.03	3e-11	71.9
on.mrna.LG1.629.2	m.4438	ENSDART00000010046.7	82.03	3e-11	71.9
on.mrna.LG1.63.1	m.2198	ENSDART00000052404.5	80.07	9e-94	345
on.mrna.LG1.630.1	m.2430	ENSDART00000075782.6	78.45	3e-91	337
on.mrna.LG1.630.2	m.2428	ENSDART00000075782.6	79.05	5e-83	309
on.mrna.LG1.630.3	m.2427	ENSDART00000075782.6	78.85	5e-86	319
on.mrna.LG1.631.1	m.3210	ENSDART00000016265.7	82.89	3e-18	95.6
on.mrna.LG1.631.2	m.3214	ENSDART00000016265.7	82.89	3e-18	95.6
on.mrna.LG1.631.3	m.3206	ENSDART00000016265.7	82.89	3e-18	95.6
on.mrna.LG1.632.1	m.3725	ENSDART00000092351.5	87.5	5e-16	87.7
on.mrna.LG1.632.2	m.3730	ENSDART00000092351.5	87.5	4e-16	87.7
on.mrna.LG1.632.3	m.3728	ENSDART00000092351.5	87.5	3e-16	87.7
on.mrna.LG1.632.4	m.3723	ENSDART00000092351.5	84.93	2e-07	58
on.mrna.LG1.633.1	m.798	ENSDART00000110907.4	81.23	2e-40	168
on.mrna.LG1.634.1	m.1779	ENSDART00000112543.3	79.98	0	841
on.mrna.LG1.634.2	m.1770	ENSDART00000112543.3	79.57	0	1096
on.mrna.LG1.634.3	m.1774	ENSDART00000112543.3	79.85	0	795
on.mrna.LG1.634.4	m.1766	ENSDART00000112543.3	79.48	0	1051
on.mrna.LG1.635.1	m.4745	ENSDART00000004120.10	80.73	8e-180	632
on.mrna.LG1.638.1	m.4728	ENSDART00000054552.7	90.57	3e-29	131
on.mrna.LG1.638.2	m.4722	ENSDART00000054552.7	79.23	1e-35	153
on.mrna.LG1.638.3	m.4726	ENSDART00000054552.7	79.23	1e-35	153
on.mrna.LG1.638.4	m.4724	ENSDART00000054552.7	79.23	1e-35	153
on.mrna.LG1.639.1	m.2807	ENSDART00000016294.7	100	0.62	36.2
on.mrna.LG1.639.2	m.2809	ENSDART00000016294.7	100	0.62	36.2
on.mrna.LG1.639.3	m.2806	ENSDART00000016294.7	100	0.5	36.2
on.mrna.LG1.640.1	m.4688	ENSDART00000012234.7	80.1	2e-39	165
on.mrna.LG1.640.2	m.4689	ENSDART00000012234.7	79.92	2e-19	97.6
on.mrna.LG1.641.1	m.39	ENSDART00000074678.4	100	0.11	40.1
on.mrna.LG1.641.2	m.40	ENSDART00000074678.4	100	0.083	40.1
on.mrna.LG1.641.3	m.38	ENSDART00000022008.6	100	1.5	36.2
on.mrna.LG1.641.4	m.37	ENSDART00000022008.6	100	1.1	36.2
on.mrna.LG1.642.1	m.895	ENSDART00000150148.2	79.34	1e-102	375
on.mrna.LG1.642.2	m.889	ENSDART00000150148.2	78.97	4e-80	299
on.mrna.LG1.642.3	m.887	ENSDART00000150148.2	78.97	4e-80	299
on.mrna.LG1.642.4	m.891	ENSDART00000150148.2	79.34	1e-102	375
on.mrna.LG1.642.5	m.893	ENSDART00000150148.2	79.34	1e-102	375
on.mrna.LG1.644.1	m.2746	ENSDART00000019991.8	88.24	3e-11	71.9
on.mrna.LG1.645.1	m.3244	ENSDART00000173034.1	100	0.007	44.1
on.mrna.LG1.646.1	m.3879	ENSDART00000025620.7	100	1.3	36.2
on.mrna.LG1.648.1	m.5532	ENSDART00000114592.3	92.31	5e-06	54
on.mrna.LG1.65.1	m.1216	ENSDART00000045374.7	83.68	0	860
on.mrna.LG1.65.2	m.1218	ENSDART00000045374.7	83.42	0	676
on.mrna.LG1.651.1	m.2421	ENSDART00000022242.9	100	0.49	36.2
on.mrna.LG1.652.1	m.4061	ENSDART00000128321.2	93.1	0.014	42.1
on.mrna.LG1.653.1	m.2444	ENSDART00000020456.6	79.63	2e-67	258
on.mrna.LG1.6530001.1	m.198	ENSDART00000080404.5	100	0.25	36.2
on.mrna.LG1.654.1	m.19	ENSDART00000164657.1	81.85	2e-85	317
on.mrna.LG1.654.2	m.25	ENSDART00000164657.1	79.81	2e-88	327
on.mrna.LG1.654.3	m.31	ENSDART00000164657.1	79.71	6e-82	305
on.mrna.LG1.654.4	m.23	ENSDART00000164657.1	81.83	5e-79	295
on.mrna.LG1.654.5	m.33	ENSDART00000164657.1	79.98	8e-88	325
on.mrna.LG1.654.6	m.29	ENSDART00000164657.1	79.87	2e-81	303
on.mrna.LG1.654.7	m.17	ENSDART00000164657.1	79.34	9e-53	208
on.mrna.LG1.655.1	m.5233	ENSDART00000124075.2	81.63	3e-41	170
on.mrna.LG1.656.1	m.3919	ENSDART00000109511.4	81.01	8e-13	77.8
on.mrna.LG1.656.1	m.3920	ENSDART00000109511.4	86.79	6e-05	50.1
on.mrna.LG1.657.1	m.3893	ENSDART00000109511.4	85.23	3e-47	192
on.mrna.LG1.658.1	m.3422	ENSDART00000114669.4	85.71	1e-23	113
on.mrna.LG1.658.2	m.3420	ENSDART00000114669.4	85.71	9e-24	113
on.mrna.LG1.659.1	m.3954	ENSDART00000098942.4	84.05	6e-60	234
on.mrna.LG1.659.2	m.3956	ENSDART00000098942.4	84.05	6e-60	234
on.mrna.LG1.659.3	m.3958	ENSDART00000098942.4	84.01	3e-58	228
on.mrna.LG1.659.4	m.3952	ENSDART00000098942.4	84.05	6e-60	234
on.mrna.LG1.660.1	m.979	ENSDART00000105215.2	81.33	2e-19	99.6
on.mrna.LG1.660.2	m.985	ENSDART00000105215.2	81.33	2e-19	99.6
on.mrna.LG1.661.1	m.4817	ENSDART00000112651.3	81.58	2e-74	283
on.mrna.LG1.661.2	m.4828	ENSDART00000112651.3	81.58	2e-74	283
on.mrna.LG1.661.3	m.4861	ENSDART00000112651.3	81.58	2e-74	283
on.mrna.LG1.661.4	m.4839	ENSDART00000112651.3	81.58	2e-74	283
on.mrna.LG1.661.5	m.4872	ENSDART00000112651.3	81.58	2e-74	283
on.mrna.LG1.661.6	m.4850	ENSDART00000112651.3	81.58	2e-74	283
on.mrna.LG1.663.1	m.3481	ENSDART00000058067.4	90.14	2e-41	170
on.mrna.LG1.665.1	m.222	ENSDART00000123174.3	90.54	2e-17	91.7
on.mrna.LG1.665.1	m.223	ENSDART00000123174.3	90.54	2e-17	91.7
on.mrna.LG1.666.1	m.5199	ENSDART00000052584.6	81.9	3e-26	121
on.mrna.LG1.667.1	m.1864	ENSDART00000167690.1	84.4	6e-119	430
on.mrna.LG1.668.1	m.2417	ENSDART00000110552.4	79.59	4e-22	107
on.mrna.LG1.67.1	m.440	ENSDART00000125131.3	85.26	4e-13	77.8
on.mrna.LG1.671.1	m.5656	ENSDART00000141211.1	83.1	0.0009	46.1
on.mrna.LG1.672.1	m.1255	ENSDART00000166308.1	82.99	2e-18	93.7
on.mrna.LG1.672.2	m.1254	ENSDART00000166308.1	82.99	2e-18	93.7
on.mrna.LG1.673.1	m.2585	ENSDART00000103638.5	80.12	9e-109	394
on.mrna.LG1.673.2	m.2587	ENSDART00000103638.5	80.12	8e-109	394
on.mrna.LG1.673.3	m.2584	ENSDART00000103638.5	80.12	8e-109	394
on.mrna.LG1.674.1	m.3142	ENSDART00000170671.1	82.43	1e-58	228
on.mrna.LG1.674.2	m.3145	ENSDART00000170671.1	84.38	2e-54	214
on.mrna.LG1.675.1	m.3909	ENSDART00000128140.2	86.96	1e-15	87.7
on.mrna.LG1.675.2	m.3912	ENSDART00000128140.2	86.96	1e-15	87.7
on.mrna.LG1.675.3	m.3901	ENSDART00000128140.2	86.96	1e-15	87.7
on.mrna.LG1.675.4	m.3905	ENSDART00000128140.2	86.96	1e-15	87.7
on.mrna.LG1.677.1	m.966	ENSDART00000081338.3	81.04	3e-77	291
on.mrna.LG1.677.2	m.962	ENSDART00000081338.3	81.04	2e-77	291
on.mrna.LG1.678.1	m.216	ENSDART00000073447.5	81.18	4e-67	258
on.mrna.LG1.678.2	m.219	ENSDART00000073447.5	81.18	3e-67	258
on.mrna.LG1.679.1	m.2890	ENSDART00000123282.2	90.32	3e-12	75.8
on.mrna.LG1.679.2	m.2909	ENSDART00000123282.2	90.32	3e-12	75.8
on.mrna.LG1.679.3	m.2875	ENSDART00000123282.2	90.32	4e-12	75.8
on.mrna.LG1.679.4	m.2919	ENSDART00000123282.2	90.32	4e-12	75.8
on.mrna.LG1.679.5	m.2900	ENSDART00000123282.2	90.32	4e-12	75.8
on.mrna.LG1.679.6	m.2882	ENSDART00000123282.2	90.32	4e-12	75.8
on.mrna.LG1.68.1	m.2077	ENSDART00000098712.4	79.47	2e-06	54
on.mrna.LG1.680.1	m.3615	ENSDART00000052365.6	85.58	1e-44	180
on.mrna.LG1.680.2	m.3613	ENSDART00000052365.6	85.58	1e-44	180
on.mrna.LG1.681.1	m.3047	ENSDART00000052366.5	81.5	3e-25	117
on.mrna.LG1.6810001.1	m.5307	ENSDART00000052366.5	84.09	2e-09	63.9
on.mrna.LG1.682.1	m.3713	ENSDART00000009386.10	81.82	4e-33	145
on.mrna.LG1.682.2	m.3710	ENSDART00000009386.10	81.82	4e-33	145
on.mrna.LG1.682.3	m.3716	ENSDART00000009386.10	81.48	1e-14	83.8
on.mrna.LG1.684.1	m.381	ENSDART00000059506.4	100	2.3	36.2
on.mrna.LG1.685.1	m.4592	ENSDART00000122009.2	78.19	9e-64	246
on.mrna.LG1.685.2	m.4597	ENSDART00000122009.2	78.19	1e-63	246
on.mrna.LG1.685.3	m.4602	ENSDART00000122009.2	83.33	7e-84	313
on.mrna.LG1.685.4	m.4588	ENSDART00000122009.2	83.33	7e-84	313
on.mrna.LG1.685.5	m.4587	ENSDART00000122009.2	83.33	5e-84	313
on.mrna.LG1.686.1	m.3736	ENSDART00000027115.8	85.71	9e-08	60
on.mrna.LG1.686.2	m.3740	ENSDART00000027115.8	85.71	8e-08	60
on.mrna.LG1.686.3	m.3732	ENSDART00000027115.8	85.71	6e-08	60
on.mrna.LG1.687.1	m.3260	ENSDART00000013150.6	77.96	8e-55	216
on.mrna.LG1.688.1	m.2549	ENSDART00000014632.9	87.37	1e-17	93.7
on.mrna.LG1.689.1	m.3282	ENSDART00000102260.5	100	0.38	36.2
on.mrna.LG1.69.1	m.4578	ENSDART00000005750.5	84.1	3e-136	486
on.mrna.LG1.690.1	m.1371	ENSDART00000077251.5	81.58	0	716
on.mrna.LG1.690.10	m.1439	ENSDART00000077251.5	81.58	0	716
on.mrna.LG1.690.11	m.1334	ENSDART00000077251.5	81.87	0	694
on.mrna.LG1.690.12	m.1362	ENSDART00000077251.5	81.87	0	694
on.mrna.LG1.690.13	m.1402	ENSDART00000077251.5	81.58	0	716
on.mrna.LG1.690.14	m.1446	ENSDART00000077251.5	81.58	0	716
on.mrna.LG1.690.15	m.1295	ENSDART00000077251.5	81.87	0	694
on.mrna.LG1.690.16	m.1330	ENSDART00000077251.5	81.58	0	716
on.mrna.LG1.690.17	m.1399	ENSDART00000077251.5	81.58	0	716
on.mrna.LG1.690.18	m.1406	ENSDART00000077251.5	81.87	0	694
on.mrna.LG1.690.19	m.1316	ENSDART00000077251.5	81.87	0	694
on.mrna.LG1.690.2	m.1421	ENSDART00000077251.5	81.87	0	694
on.mrna.LG1.690.20	m.1395	ENSDART00000077251.5	81.58	0	716
on.mrna.LG1.690.21	m.1391	ENSDART00000077251.5	81.58	0	716
on.mrna.LG1.690.22	m.1410	ENSDART00000077251.5	81.87	0	694
on.mrna.LG1.690.23	m.1326	ENSDART00000077251.5	81.87	0	694
on.mrna.LG1.690.24	m.1386	ENSDART00000077251.5	81.58	0	716
on.mrna.LG1.690.25	m.1347	ENSDART00000077251.5	81.58	0	716
on.mrna.LG1.690.26	m.1366	ENSDART00000077251.5	81.87	0	694
on.mrna.LG1.690.27	m.1311	ENSDART00000077251.5	81.58	0	716
on.mrna.LG1.690.28	m.1340	ENSDART00000077251.5	81.87	0	694
on.mrna.LG1.690.29	m.1382	ENSDART00000077251.5	81.87	0	694
on.mrna.LG1.690.3	m.1302	ENSDART00000077251.5	81.87	0	694
on.mrna.LG1.690.30	m.1305	ENSDART00000077251.5	81.58	0	716
on.mrna.LG1.690.31	m.1299	ENSDART00000077251.5	81.58	0	716
on.mrna.LG1.690.32	m.1320	ENSDART00000077251.5	81.87	0	694
on.mrna.LG1.690.33	m.1415	ENSDART00000077251.5	81.58	0	716
on.mrna.LG1.690.34	m.1424	ENSDART00000077251.5	81.87	0	694
on.mrna.LG1.690.35	m.1373	ENSDART00000077251.5	81.87	0	694
on.mrna.LG1.690.36	m.1359	ENSDART00000077251.5	81.87	0	694
on.mrna.LG1.690.37	m.1356	ENSDART00000077251.5	81.58	0	716
on.mrna.LG1.690.38	m.1379	ENSDART00000077251.5	81.58	0	716
on.mrna.LG1.690.39	m.1428	ENSDART00000077251.5	81.87	0	694
on.mrna.LG1.690.4	m.1351	ENSDART00000077251.5	81.58	0	716
on.mrna.LG1.690.40	m.1432	ENSDART00000077251.5	81.87	0	694
on.mrna.LG1.690.41	m.1337	ENSDART00000077251.5	81.58	0	716
on.mrna.LG1.690.42	m.1343	ENSDART00000077251.5	81.58	0	716
on.mrna.LG1.690.43	m.1435	ENSDART00000077251.5	81.87	0	694
on.mrna.LG1.690.44	m.1442	ENSDART00000077251.5	81.58	0	716
on.mrna.LG1.690.5	m.1376	ENSDART00000077251.5	81.58	0	716
on.mrna.LG1.690.6	m.1354	ENSDART00000077251.5	81.87	0	694
on.mrna.LG1.690.7	m.1309	ENSDART00000077251.5	81.87	0	694
on.mrna.LG1.690.8	m.1419	ENSDART00000077251.5	81.58	0	716
on.mrna.LG1.690.9	m.1324	ENSDART00000077251.5	81.58	0	716
on.mrna.LG1.691.1	m.4928	ENSDART00000140089.1	79.9	4e-80	301
on.mrna.LG1.691.2	m.4934	ENSDART00000140089.1	79.71	1e-73	280
on.mrna.LG1.691.3	m.4922	ENSDART00000140089.1	79.9	4e-80	301
on.mrna.LG1.691.4	m.4939	ENSDART00000140089.1	79.71	1e-73	280
on.mrna.LG1.692.1	m.5077	ENSDART00000011967.6	81.4	3e-53	210
on.mrna.LG1.692.10	m.5068	ENSDART00000011967.6	82.07	1e-32	141
on.mrna.LG1.692.2	m.5075	ENSDART00000011967.6	81.4	3e-53	210
on.mrna.LG1.692.3	m.5066	ENSDART00000011967.6	81.5	4e-21	103
on.mrna.LG1.692.4	m.5069	ENSDART00000011967.6	81.5	4e-21	103
on.mrna.LG1.692.5	m.5073	ENSDART00000011967.6	82.07	2e-32	141
on.mrna.LG1.692.6	m.5074	ENSDART00000011967.6	82.07	2e-32	141
on.mrna.LG1.692.7	m.5081	ENSDART00000011967.6	81.5	4e-21	103
on.mrna.LG1.692.8	m.5071	ENSDART00000011967.6	81.5	4e-21	103
on.mrna.LG1.692.9	m.5079	ENSDART00000011967.6	81.4	2e-53	210
on.mrna.LG1.693.1	m.2782	ENSDART00000125036.2	88.83	4e-58	226
on.mrna.LG1.693.1	m.2783	ENSDART00000125036.2	88.83	4e-58	226
on.mrna.LG1.694.1	m.3008	ENSDART00000075757.3	84.52	8e-45	180
on.mrna.LG1.694.2	m.3005	ENSDART00000075757.3	84.52	9e-45	180
on.mrna.LG1.695.1	m.459	ENSDART00000136059.2	86.09	2e-20	101
on.mrna.LG1.695.2	m.468	ENSDART00000136059.2	95.56	4e-12	73.8
on.mrna.LG1.695.3	m.462	ENSDART00000136059.2	86.09	2e-20	101
on.mrna.LG1.695.4	m.456	ENSDART00000136059.2	86.09	2e-20	101
on.mrna.LG1.695.5	m.465	ENSDART00000136059.2	95.56	4e-12	73.8
on.mrna.LG1.695.6	m.453	ENSDART00000136059.2	95.56	3e-12	73.8
on.mrna.LG1.696.1	m.1607	ENSDART00000093004.4	100	0.0005	46.1
on.mrna.LG1.696.2	m.1605	ENSDART00000093004.4	100	0.0005	46.1
on.mrna.LG1.696.3	m.1606	ENSDART00000093004.4	100	0.0003	46.1
on.mrna.LG1.697.1	m.4557	ENSDART00000142482.1	82.5	0.0002	48.1
on.mrna.LG1.697.2	m.4562	ENSDART00000142482.1	82.5	0.0002	48.1
on.mrna.LG1.698.1	m.829	ENSDART00000162614.1	100	0.36	36.2
on.mrna.LG1.7.1	m.294	ENSDART00000162653.1	82.7	2e-23	113
on.mrna.LG1.70.1	m.1971	ENSDART00000067332.3	82.49	7e-80	299
on.mrna.LG1.700.1	m.2828	ENSDART00000064509.6	92	1e-10	67.9
on.mrna.LG1.700.2	m.2825	ENSDART00000064509.6	92	1e-10	67.9
on.mrna.LG1.700.3	m.2821	ENSDART00000048375.6	81.73	3e-07	56
on.mrna.LG1.700.4	m.2823	ENSDART00000064509.6	92	2e-10	67.9
on.mrna.LG1.701.1	m.2138	ENSDART00000139918.1	81.42	1e-95	351
on.mrna.LG1.701.2	m.2136	ENSDART00000139918.1	82.96	5e-76	285
on.mrna.LG1.702.1	m.44	ENSDART00000019050.7	100	0.56	36.2
on.mrna.LG1.703.1	m.3010	ENSDART00000144562.3	100	0.12	38.2
on.mrna.LG1.703.2	m.3015	ENSDART00000157833.1	100	0.44	36.2
on.mrna.LG1.704.1	m.1510	ENSDART00000004964.7	93.1	0.012	42.1
on.mrna.LG1.704.2	m.1516	ENSDART00000004964.7	93.1	0.012	42.1
on.mrna.LG1.704.3	m.1514	ENSDART00000004964.7	93.1	0.012	42.1
on.mrna.LG1.704.4	m.1512	ENSDART00000004964.7	93.1	0.012	42.1
on.mrna.LG1.705.1	m.4683	ENSDART00000039485.6	82.42	6e-52	204
on.mrna.LG1.707.1	m.5244	ENSDART00000156334.1	100	0.33	36.2
on.mrna.LG1.707.2	m.5241	ENSDART00000085216.5	100	0.008	42.1
on.mrna.LG1.709.1	m.3858	ENSDART00000146472.1	82.74	7e-21	103
on.mrna.LG1.71.1	m.3601	ENSDART00000035067.7	78.85	2e-98	361
on.mrna.LG1.71.2	m.3600	ENSDART00000035067.7	78.85	2e-98	361
on.mrna.LG1.710.1	m.1292	ENSDART00000008807.7	82.82	4e-75	281
on.mrna.LG1.710.2	m.1286	ENSDART00000008807.7	83.47	1e-90	333
on.mrna.LG1.710.3	m.1289	ENSDART00000008807.7	82.82	4e-75	281
on.mrna.LG1.714.1	m.3686	ENSDART00000003826.8	100	2.5	34.2
on.mrna.LG1.715.1	m.3544	ENSDART00000101537.4	82.71	1e-106	389
on.mrna.LG1.716.1	m.2946	ENSDART00000113905.3	81.93	1e-73	280
on.mrna.LG1.716.1	m.2947	ENSDART00000113905.3	81.93	4e-74	280
on.mrna.LG1.716.2	m.2939	ENSDART00000113905.3	81.93	8e-74	280
on.mrna.LG1.716.2	m.2940	ENSDART00000113905.3	81.93	4e-74	280
on.mrna.LG1.716.3	m.2950	ENSDART00000113905.3	81.93	6e-74	280
on.mrna.LG1.716.3	m.2951	ENSDART00000113905.3	81.93	4e-74	280
on.mrna.LG1.716.4	m.2943	ENSDART00000113905.3	81.93	5e-74	280
on.mrna.LG1.716.4	m.2944	ENSDART00000113905.3	81.93	4e-74	280
on.mrna.LG1.716.5	m.2935	ENSDART00000113905.3	81.93	6e-74	280
on.mrna.LG1.716.5	m.2936	ENSDART00000113905.3	81.93	4e-74	280
on.mrna.LG1.717.1	m.2022	ENSDART00000109698.3	100	0.26	36.2
on.mrna.LG1.718.1	m.5024	ENSDART00000052750.6	89.13	4e-06	52
on.mrna.LG1.7180001.1	m.2099	ENSDART00000052750.6	81.05	0.0004	46.1
on.mrna.LG1.719.1	m.4744	ENSDART00000052750.6	85.71	7e-05	48.1
on.mrna.LG1.720.1	m.1535	ENSDART00000024919.8	93.02	3e-08	61.9
on.mrna.LG1.720.10	m.1528	ENSDART00000024919.8	93.02	2e-08	61.9
on.mrna.LG1.720.11	m.1548	ENSDART00000024919.8	93.02	3e-08	61.9
on.mrna.LG1.720.12	m.1544	ENSDART00000024919.8	93.02	3e-08	61.9
on.mrna.LG1.720.13	m.1530	ENSDART00000024919.8	93.02	3e-08	61.9
on.mrna.LG1.720.2	m.1518	ENSDART00000024919.8	93.02	3e-08	61.9
on.mrna.LG1.720.3	m.1550	ENSDART00000024919.8	93.02	3e-08	61.9
on.mrna.LG1.720.4	m.1546	ENSDART00000024919.8	93.02	3e-08	61.9
on.mrna.LG1.720.5	m.1522	ENSDART00000024919.8	93.02	3e-08	61.9
on.mrna.LG1.720.6	m.1532	ENSDART00000024919.8	93.02	2e-08	61.9
on.mrna.LG1.720.7	m.1539	ENSDART00000024919.8	93.02	3e-08	61.9
on.mrna.LG1.720.8	m.1526	ENSDART00000024919.8	93.02	3e-08	61.9
on.mrna.LG1.720.9	m.1541	ENSDART00000024919.8	93.02	2e-08	61.9
on.mrna.LG1.721.1	m.2512	ENSDART00000091584.6	82.52	1e-08	61.9
on.mrna.LG1.721.2	m.2516	ENSDART00000091584.6	82.52	1e-08	61.9
on.mrna.LG1.723.1	m.2157	ENSDART00000023301.8	80.07	3e-26	119
on.mrna.LG1.724.1	m.4355	ENSDART00000163274.1	84.31	9e-96	353
on.mrna.LG1.724.2	m.4342	ENSDART00000163274.1	86	2e-81	305
on.mrna.LG1.724.3	m.4349	ENSDART00000163274.1	84.5	2e-99	365
on.mrna.LG1.724.4	m.4336	ENSDART00000163274.1	84.31	9e-96	353
on.mrna.LG1.726.1	m.483	ENSDART00000168136.1	88.39	9e-40	165
on.mrna.LG1.727.1	m.1616	ENSDART00000131059.2	82.28	0	729
on.mrna.LG1.727.2	m.1614	ENSDART00000131059.2	81.85	1e-179	630
on.mrna.LG1.727.3	m.1618	ENSDART00000081335.6	82.15	4e-138	492
on.mrna.LG1.728.1	m.1877	ENSDART00000103449.4	82.2	3e-121	436
on.mrna.LG1.728.2	m.1882	ENSDART00000103449.4	82.28	4e-124	446
on.mrna.LG1.728.2	m.1883	ENSDART00000103449.4	82.28	4e-124	446
on.mrna.LG1.728.3	m.1885	ENSDART00000103449.4	82.28	4e-124	446
on.mrna.LG1.728.3	m.1886	ENSDART00000103449.4	82.28	4e-124	446
on.mrna.LG1.728.4	m.1879	ENSDART00000103449.4	82.28	4e-124	446
on.mrna.LG1.728.4	m.1880	ENSDART00000103449.4	82.28	4e-124	446
on.mrna.LG1.7280001.1	m.589	ENSDART00000011324.8	80.11	5e-13	75.8
on.mrna.LG1.73.1	m.330	ENSDART00000015884.8	80.74	2e-45	184
on.mrna.LG1.730.1	m.3572	ENSDART00000113998.4	85.73	1e-178	626
on.mrna.LG1.730.2	m.3570	ENSDART00000113998.4	85.73	1e-178	626
on.mrna.LG1.731.1	m.3877	ENSDART00000157410.1	80.92	1e-14	81.8
on.mrna.LG1.731.2	m.3874	ENSDART00000169614.1	82.73	9e-16	85.7
on.mrna.LG1.731.3	m.3876	ENSDART00000157410.1	80.92	9e-15	81.8
on.mrna.LG1.732.1	m.2419	ENSDART00000169614.1	78.55	4e-25	117
on.mrna.LG1.733.1	m.1863	ENSDART00000157115.1	100	1.3	34.2
on.mrna.LG1.734.1	m.750	ENSDART00000170637.1	79.36	2e-12	75.8
on.mrna.LG1.734.2	m.745	ENSDART00000170637.1	90.91	9e-15	83.8
on.mrna.LG1.734.3	m.748	ENSDART00000170637.1	90.91	8e-15	83.8
on.mrna.LG1.735.1	m.886	ENSDART00000025057.7	100	0.076	38.2
on.mrna.LG1.737.1	m.479	ENSDART00000055292.5	100	0.12	38.2
on.mrna.LG1.7370001.1	m.2694	ENSDART00000170253.1	86.76	3e-09	63.9
on.mrna.LG1.738.1	m.4968	ENSDART00000113744.4	86.67	1e-10	69.9
on.mrna.LG1.739.1	m.4954	ENSDART00000052383.6	89.77	3e-21	103
on.mrna.LG1.74.1	m.5200	ENSDART00000005724.8	88.46	1e-06	56
on.mrna.LG1.740.1	m.1279	ENSDART00000076469.4	80.93	7e-158	559
on.mrna.LG1.740.2	m.1280	ENSDART00000076469.4	80.93	6e-158	559
on.mrna.LG1.740.3	m.1281	ENSDART00000076469.4	80.93	6e-158	559
on.mrna.LG1.743.1	m.5065	ENSDART00000157602.1	84.62	0.023	40.1
on.mrna.LG1.743.2	m.5064	ENSDART00000157602.1	84.62	0.023	40.1
on.mrna.LG1.743.3	m.5063	ENSDART00000157602.1	84.62	0.023	40.1
on.mrna.LG1.744.1	m.3101	ENSDART00000159700.2	89.36	2e-06	54
on.mrna.LG1.744.2	m.3100	ENSDART00000159700.2	89.36	2e-06	54
on.mrna.LG1.745.2	m.4894	ENSDART00000114851.2	100	9.5	32.2
on.mrna.LG1.745.3	m.4900	ENSDART00000114851.2	100	8.4	32.2
on.mrna.LG1.745.4	m.4892	ENSDART00000080997.5	100	2.1	34.2
on.mrna.LG1.745.5	m.4903	ENSDART00000050916.4	100	2.7	34.2
on.mrna.LG1.745.6	m.4897	ENSDART00000114851.2	100	9.5	32.2
on.mrna.LG1.746.1	m.2736	ENSDART00000163991.2	79.21	3e-10	67.9
on.mrna.LG1.747.1	m.2265	ENSDART00000167149.1	81.49	2e-45	186
on.mrna.LG1.748.1	m.946	ENSDART00000105823.5	100	1.5	36.2
on.mrna.LG1.748.1	m.948	ENSDART00000105823.5	100	1.2	36.2
on.mrna.LG1.7480001.1	m.4779	ENSDART00000166565.2	87.06	8e-15	81.8
on.mrna.LG1.749.1	m.1609	ENSDART00000049701.2	82.27	2e-25	117
on.mrna.LG1.75.1	m.2079	ENSDART00000167035.1	85.71	9e-46	184
on.mrna.LG1.75.2	m.2081	ENSDART00000167035.1	84	5e-28	125
on.mrna.LG1.75.3	m.2082	ENSDART00000167035.1	84	6e-28	125
on.mrna.LG1.75.4	m.2080	ENSDART00000167035.1	84	5e-28	125
on.mrna.LG1.75.5	m.2078	ENSDART00000167035.1	84	5e-28	125
on.mrna.LG1.752.1	m.163	ENSDART00000090743.5	80.97	0	985
on.mrna.LG1.752.2	m.179	ENSDART00000090743.5	80.97	0	985
on.mrna.LG1.752.3	m.169	ENSDART00000090743.5	80.97	0	985
on.mrna.LG1.752.4	m.175	ENSDART00000090743.5	80.69	0	999
on.mrna.LG1.753.1	m.1761	ENSDART00000097460.4	79.9	7e-62	240
on.mrna.LG1.753.2	m.1758	ENSDART00000097460.4	79.9	8e-62	240
on.mrna.LG1.7530001.1	m.195	ENSDART00000125230.2	100	0.14	38.2
on.mrna.LG1.76.1	m.1270	ENSDART00000063024.4	92.31	2e-06	54
on.mrna.LG1.76.2	m.1267	ENSDART00000063024.4	92.31	2e-06	54
on.mrna.LG1.76.3	m.1269	ENSDART00000063024.4	92.31	1e-06	54
on.mrna.LG1.76.4	m.1263	ENSDART00000063024.4	92.31	2e-06	54
on.mrna.LG1.76.5	m.1265	ENSDART00000063024.4	92.31	2e-06	54
on.mrna.LG1.77.1	m.3310	ENSDART00000166497.1	93.1	0.018	42.1
on.mrna.LG1.77.2	m.3308	ENSDART00000166497.1	93.1	0.018	42.1
on.mrna.LG1.77.3	m.3309	ENSDART00000166497.1	93.1	0.018	42.1
on.mrna.LG1.77.4	m.3311	ENSDART00000166497.1	93.1	0.018	42.1
on.mrna.LG1.78.1	m.5496	ENSDART00000129459.2	87.5	2e-06	56
on.mrna.LG1.78.2	m.5498	ENSDART00000129459.2	84.13	0.002	46.1
on.mrna.LG1.78.3	m.5492	ENSDART00000129459.2	87.5	2e-06	56
on.mrna.LG1.78.4	m.5494	ENSDART00000129459.2	87.5	2e-06	56
on.mrna.LG1.79.1	m.2687	ENSDART00000136189.1	79.29	9e-90	333
on.mrna.LG1.79.2	m.2685	ENSDART00000136189.1	79.29	9e-90	333
on.mrna.LG1.79.3	m.2680	ENSDART00000136189.1	79.29	9e-90	333
on.mrna.LG1.79.4	m.2682	ENSDART00000136189.1	79.29	8e-90	333
on.mrna.LG1.79.5	m.2678	ENSDART00000136189.1	79.29	9e-90	333
on.mrna.LG1.79.6	m.2683	ENSDART00000136189.1	79.29	9e-90	333
on.mrna.LG1.79.7	m.2689	ENSDART00000136189.1	79.29	8e-90	333
on.mrna.LG1.8.1	m.1848	ENSDART00000109635.2	77.45	7e-12	71.9
on.mrna.LG1.80.1	m.4134	ENSDART00000082496.3	86	0.002	44.1
on.mrna.LG1.80.2	m.4133	ENSDART00000082496.3	79.88	4e-09	63.9
on.mrna.LG1.80.3	m.4132	ENSDART00000082496.3	79.88	4e-09	63.9
on.mrna.LG1.81.1	m.3485	ENSDART00000148892.1	100	0.002	44.1
on.mrna.LG1.81.2	m.3484	ENSDART00000148892.1	100	0.002	44.1
on.mrna.LG1.82.1	m.4451	ENSDART00000006124.7	82.9	0	813
on.mrna.LG1.83.1	m.2672	ENSDART00000114005.3	96.55	0.0002	50.1
on.mrna.LG1.84.1	m.2711	ENSDART00000115259.3	95.65	0.29	38.2
on.mrna.LG1.84.2	m.2709	ENSDART00000115259.3	95.65	0.31	38.2
on.mrna.LG1.84.3	m.2710	ENSDART00000126239.2	100	0.098	40.1
on.mrna.LG1.84.4	m.2708	ENSDART00000126239.2	100	0.098	40.1
on.mrna.LG1.85.1	m.1589	ENSDART00000173057.1	81.4	1e-106	391
on.mrna.LG1.85.2	m.1596	ENSDART00000173057.1	81.4	1e-106	391
on.mrna.LG1.86.1	m.399	ENSDART00000172505.1	81.97	1e-10	67.9
on.mrna.LG1.86.2	m.397	ENSDART00000172505.1	81.97	1e-10	67.9
on.mrna.LG1.86.3	m.398	ENSDART00000172505.1	81.97	1e-10	67.9
on.mrna.LG1.87.1	m.5094	ENSDART00000165073.1	86.36	0.17	40.1
on.mrna.LG1.87.2	m.5090	ENSDART00000165073.1	86.36	0.16	40.1
on.mrna.LG1.88.1	m.4444	ENSDART00000082504.6	88.4	3e-63	244
on.mrna.LG1.88.2	m.4447	ENSDART00000082504.6	88.4	3e-63	244
on.mrna.LG1.89.1	m.3599	ENSDART00000021462.5	84.29	8e-06	52
on.mrna.LG1.9.1	m.4003	ENSDART00000109872.2	80.77	2e-47	190
on.mrna.LG1.90.1	m.3393	ENSDART00000049171.6	80.06	3e-145	517
on.mrna.LG1.90.2	m.3395	ENSDART00000049171.6	80.06	3e-145	517
on.mrna.LG1.90.3	m.3399	ENSDART00000049171.6	80.06	3e-145	517
on.mrna.LG1.90.4	m.3401	ENSDART00000049171.6	80.06	3e-145	517
on.mrna.LG1.90.5	m.3397	ENSDART00000049171.6	80.06	3e-145	517
on.mrna.LG1.91.1	m.1824	ENSDART00000149158.2	80.47	0	747
on.mrna.LG1.91.2	m.1814	ENSDART00000129387.2	79.69	0	664
on.mrna.LG1.91.3	m.1819	ENSDART00000129387.2	79.69	0	664
on.mrna.LG1.91.4	m.1829	ENSDART00000149158.2	80.47	0	747
on.mrna.LG1.92.1	m.2350	ENSDART00000087960.5	81.82	3e-11	71.9
on.mrna.LG1.94.1	m.2076	ENSDART00000125116.1	81.7	5e-75	281
on.mrna.LG1.96.1	m.5361	ENSDART00000122930.2	80.48	2e-51	204
[truncated: 49,426 more rows]

## Sheet: Ld_Drerio
Onil_transcripID	denovo_trancriptID_QUERY	Drerio_transcriptID_SUBJECT	percentID	eval	bit_score
on.mrna.LG1.1.1	m.3174	ENSDART00000008785.8	82.57	3e-77	289
on.mrna.LG1.1.2	m.3176	ENSDART00000008785.8	84.52	6e-64	244
on.mrna.LG1.10.1	m.3146	ENSDART00000166391.1	90.41	1e-16	89.7
on.mrna.LG1.100.1	m.207	ENSDART00000029549.8	79.49	8e-108	392
on.mrna.LG1.100.2	m.213	ENSDART00000029549.8	79.49	8e-108	392
on.mrna.LG1.100.3	m.204	ENSDART00000029549.8	79.49	8e-108	392
on.mrna.LG1.100.4	m.210	ENSDART00000029549.8	79.49	8e-108	392
on.mrna.LG1.101.1	m.3444	ENSDART00000039969.5	92.59	0.51	38.2
on.mrna.LG1.102.1	m.2823	ENSDART00000151550.1	84.39	3e-28	129
on.mrna.LG1.102.2	m.2818	ENSDART00000151550.1	84.39	3e-28	129
on.mrna.LG1.102.3	m.2828	ENSDART00000151550.1	84.39	3e-28	129
on.mrna.LG1.102.4	m.2813	ENSDART00000151550.1	84.39	3e-28	129
on.mrna.LG1.103.1	m.4543	ENSDART00000149321.1	80.85	1e-11	71.9
on.mrna.LG1.104.1	m.3780	ENSDART00000121864.2	88.1	5e-16	87.7
on.mrna.LG1.105.1	m.216	ENSDART00000052641.5	79.18	6e-95	349
on.mrna.LG1.106.1	m.5516	ENSDART00000129125.2	79.26	4e-86	321
on.mrna.LG1.108.1	m.2113	ENSDART00000013525.7	100	0.031	40.1
on.mrna.LG1.108.2	m.2092	ENSDART00000013525.7	100	0.031	40.1
on.mrna.LG1.108.3	m.2101	ENSDART00000013525.7	100	0.031	40.1
on.mrna.LG1.108.4	m.2095	ENSDART00000013525.7	100	0.029	40.1
on.mrna.LG1.108.5	m.2107	ENSDART00000013525.7	100	0.029	40.1
on.mrna.LG1.108.6	m.2098	ENSDART00000013525.7	100	0.1	40.1
on.mrna.LG1.108.7	m.2104	ENSDART00000013525.7	100	0.1	40.1
on.mrna.LG1.108.8	m.2110	ENSDART00000013525.7	100	0.1	40.1
on.mrna.LG1.109.1	m.3776	ENSDART00000159781.1	81.72	9e-05	50.1
on.mrna.LG1.109.2	m.3768	ENSDART00000159781.1	81.72	0.0001	50.1
on.mrna.LG1.109.3	m.3774	ENSDART00000159781.1	95.83	1e-13	79.8
on.mrna.LG1.109.4	m.3770	ENSDART00000159781.1	95.83	2e-13	79.8
on.mrna.LG1.109.5	m.3772	ENSDART00000159781.1	95.83	9e-14	79.8
on.mrna.LG1.109.6	m.3778	ENSDART00000159781.1	95.83	7e-14	79.8
on.mrna.LG1.11.1	m.3874	ENSDART00000169830.1	81.66	8e-61	236
on.mrna.LG1.11.2	m.3872	ENSDART00000169830.1	81.57	1e-53	212
on.mrna.LG1.110.1	m.3784	ENSDART00000102553.4	85.95	1e-21	105
on.mrna.LG1.110.2	m.3783	ENSDART00000102553.4	85.95	1e-21	105
on.mrna.LG1.110.3	m.3786	ENSDART00000102553.4	85.95	1e-21	105
on.mrna.LG1.110.4	m.3785	ENSDART00000102553.4	85.95	1e-21	105
on.mrna.LG1.111.1	m.2868	ENSDART00000159480.1	88.14	2e-08	61.9
on.mrna.LG1.111.2	m.2873	ENSDART00000159480.1	80.42	2e-18	95.6
on.mrna.LG1.111.3	m.2865	ENSDART00000159480.1	80.42	2e-18	95.6
on.mrna.LG1.111.4	m.2870	ENSDART00000159480.1	80.42	2e-18	95.6
on.mrna.LG1.111.5	m.2863	ENSDART00000159480.1	80.42	2e-18	95.6
on.mrna.LG1.112.1	m.3065	ENSDART00000109970.3	100	0.057	40.1
on.mrna.LG1.112.2	m.3071	ENSDART00000109970.3	100	0.061	40.1
on.mrna.LG1.112.3	m.3062	ENSDART00000109970.3	100	0.057	40.1
on.mrna.LG1.112.4	m.3068	ENSDART00000109970.3	100	0.061	40.1
on.mrna.LG1.113.1	m.1743	ENSDART00000081319.5	85.47	5e-19	97.6
on.mrna.LG1.113.2	m.1747	ENSDART00000081319.5	85.47	5e-19	97.6
on.mrna.LG1.113.3	m.1736	ENSDART00000081319.5	85.47	5e-19	97.6
on.mrna.LG1.113.4	m.1751	ENSDART00000081319.5	85.47	4e-19	97.6
on.mrna.LG1.113.5	m.1733	ENSDART00000081319.5	85.47	4e-19	97.6
on.mrna.LG1.113.6	m.1740	ENSDART00000081319.5	85.47	3e-19	97.6
on.mrna.LG1.114.1	m.2322	ENSDART00000168352.1	89.96	1e-75	283
on.mrna.LG1.115.1	m.865	ENSDART00000003475.5	94.74	9e-08	60
on.mrna.LG1.116.1	m.1694	ENSDART00000036050.7	94.92	3e-18	93.7
on.mrna.LG1.116.2	m.1691	ENSDART00000036050.7	94.92	3e-18	93.7
on.mrna.LG1.116.3	m.1697	ENSDART00000036050.7	94.92	3e-18	93.7
on.mrna.LG1.117.1	m.5046	ENSDART00000010026.7	85.54	2e-10	69.9
on.mrna.LG1.117.2	m.5051	ENSDART00000010026.7	85.54	2e-10	69.9
on.mrna.LG1.117.3	m.5056	ENSDART00000010026.7	83.78	4e-05	52
on.mrna.LG1.118.1	m.4195	ENSDART00000165019.1	87.69	8e-49	196
on.mrna.LG1.118.2	m.4192	ENSDART00000165019.1	87.69	8e-49	196
on.mrna.LG1.119.2	m.3108	ENSDART00000101466.4	100	7.8	34.2
on.mrna.LG1.12.1	m.4688	ENSDART00000164643.1	81.67	2e-88	329
on.mrna.LG1.12.2	m.4691	ENSDART00000164643.1	81.67	2e-88	329
on.mrna.LG1.12.3	m.4694	ENSDART00000164643.1	81.67	2e-88	329
on.mrna.LG1.1210001.1	m.3812	ENSDART00000003712.7	78.99	2e-40	168
on.mrna.LG1.122.1	m.3921	ENSDART00000110892.4	100	0.19	38.2
on.mrna.LG1.122.2	m.3919	ENSDART00000140476.1	100	0.015	42.1
on.mrna.LG1.123.1	m.5668	ENSDART00000079175.5	81.44	8e-05	50.1
on.mrna.LG1.123.2	m.5672	ENSDART00000079175.5	81.44	9e-05	50.1
on.mrna.LG1.123.3	m.5670	ENSDART00000079175.5	78.41	3e-08	61.9
on.mrna.LG1.123.4	m.5666	ENSDART00000079175.5	78.41	3e-08	61.9
on.mrna.LG1.124.1	m.4869	ENSDART00000145251.1	87.27	3e-06	54
on.mrna.LG1.124.2	m.4868	ENSDART00000145251.1	87.27	4e-06	54
on.mrna.LG1.124.3	m.4870	ENSDART00000145251.1	87.27	3e-06	54
on.mrna.LG1.124.4	m.4871	ENSDART00000145251.1	87.27	3e-06	54
on.mrna.LG1.125.1	m.4885	ENSDART00000032177.7	100	4.6	34.2
on.mrna.LG1.126.1	m.1370	ENSDART00000168609.1	82.05	5e-09	65.9
on.mrna.LG1.127.1	m.3053	ENSDART00000026434.7	100	0.051	40.1
on.mrna.LG1.127.10	m.3054	ENSDART00000026434.7	100	0.042	40.1
on.mrna.LG1.127.11	m.3057	ENSDART00000026434.7	100	0.027	40.1
on.mrna.LG1.127.12	m.3051	ENSDART00000026434.7	100	0.037	40.1
on.mrna.LG1.127.13	m.3048	ENSDART00000026434.7	100	0.027	40.1
on.mrna.LG1.127.2	m.3056	ENSDART00000026434.7	100	0.042	40.1
on.mrna.LG1.127.3	m.3052	ENSDART00000026434.7	100	0.046	40.1
on.mrna.LG1.127.4	m.3058	ENSDART00000026434.7	100	0.036	40.1
on.mrna.LG1.127.5	m.3055	ENSDART00000026434.7	100	0.049	40.1
on.mrna.LG1.127.6	m.3050	ENSDART00000026434.7	100	0.036	40.1
on.mrna.LG1.127.7	m.3059	ENSDART00000026434.7	100	0.034	40.1
on.mrna.LG1.127.8	m.3047	ENSDART00000026434.7	100	0.044	40.1
on.mrna.LG1.127.9	m.3049	ENSDART00000026434.7	100	0.034	40.1
on.mrna.LG1.128.1	m.3787	ENSDART00000168428.1	85.94	2e-06	56
on.mrna.LG1.128.2	m.3789	ENSDART00000168428.1	85.94	1e-06	56
on.mrna.LG1.129.1	m.2479	ENSDART00000168091.1	80.84	8e-73	276
on.mrna.LG1.13.1	m.5420	ENSDART00000010322.8	86.49	2e-10	67.9
on.mrna.LG1.13.2	m.5419	ENSDART00000010322.8	86.49	2e-10	67.9
on.mrna.LG1.130.1	m.1828	ENSDART00000053588.4	100	2.2	34.2
on.mrna.LG1.130.1	m.1829	ENSDART00000056588.5	100	4.6	32.2
on.mrna.LG1.132.1	m.295	ENSDART00000082153.5	100	0.046	42.1
on.mrna.LG1.132.2	m.297	ENSDART00000082153.5	100	0.041	42.1
on.mrna.LG1.1320001.1	m.2716	ENSDART00000054925.6	83.52	4e-26	119
on.mrna.LG1.133.1	m.480	ENSDART00000055047.6	81.82	4e-24	113
on.mrna.LG1.133.2	m.481	ENSDART00000055047.6	81.82	4e-24	113
on.mrna.LG1.134.1	m.4728	ENSDART00000075941.4	100	0.22	38.2
on.mrna.LG1.135.1	m.5581	ENSDART00000022307.9	78.94	3e-100	367
on.mrna.LG1.135.2	m.5579	ENSDART00000022307.9	79.4	6e-64	246
on.mrna.LG1.135.3	m.5583	ENSDART00000022307.9	78.94	2e-100	367
on.mrna.LG1.136.1	m.4486	ENSDART00000010521.7	82.25	1e-47	194
on.mrna.LG1.136.2	m.4500	ENSDART00000010521.7	82.25	1e-47	194
on.mrna.LG1.136.3	m.4479	ENSDART00000010521.7	82.25	1e-47	194
on.mrna.LG1.136.4	m.4507	ENSDART00000010521.7	82.25	1e-47	194
on.mrna.LG1.136.5	m.4493	ENSDART00000010521.7	82.25	1e-47	194
on.mrna.LG1.137.1	m.1814	ENSDART00000091901.5	84.05	1e-90	333
on.mrna.LG1.137.2	m.1813	ENSDART00000091901.5	84.19	1e-131	470
on.mrna.LG1.137.3	m.1815	ENSDART00000091901.5	84.35	0	678
on.mrna.LG1.137.4	m.1811	ENSDART00000091901.5	84.51	3e-179	628
on.mrna.LG1.138.1	m.3739	ENSDART00000169908.1	79.81	2e-26	121
on.mrna.LG1.138.2	m.3738	ENSDART00000169908.1	79.81	2e-26	121
on.mrna.LG1.139.1	m.1591	ENSDART00000065933.5	82.02	2e-19	99.6
on.mrna.LG1.139.2	m.1594	ENSDART00000065933.5	82.02	2e-19	99.6
on.mrna.LG1.14.1	m.4245	ENSDART00000039810.6	83.93	5e-121	438
on.mrna.LG1.140.1	m.2987	ENSDART00000111091.3	91.67	1e-08	63.9
on.mrna.LG1.140.2	m.3008	ENSDART00000111091.3	91.67	2e-08	63.9
on.mrna.LG1.140.3	m.3014	ENSDART00000111091.3	91.67	1e-08	63.9
on.mrna.LG1.140.4	m.3002	ENSDART00000111091.3	91.67	2e-08	63.9
on.mrna.LG1.140.5	m.2996	ENSDART00000111091.3	91.67	2e-08	63.9
on.mrna.LG1.140.6	m.2991	ENSDART00000111091.3	91.67	1e-08	63.9
on.mrna.LG1.141.1	m.4935	ENSDART00000033528.7	100	0.44	38.2
on.mrna.LG1.142.1	m.3927	ENSDART00000026135.8	93.1	0.039	42.1
on.mrna.LG1.142.2	m.3924	ENSDART00000026135.8	93.1	0.039	42.1
on.mrna.LG1.142.3	m.3925	ENSDART00000026135.8	93.1	0.023	42.1
on.mrna.LG1.142.4	m.3923	ENSDART00000026135.8	93.1	0.032	42.1
on.mrna.LG1.142.5	m.3926	ENSDART00000026135.8	93.1	0.026	42.1
on.mrna.LG1.143.1	m.721	ENSDART00000126243.2	77.83	1e-17	93.7
on.mrna.LG1.143.10	m.658	ENSDART00000126243.2	80.84	5e-13	77.8
on.mrna.LG1.143.11	m.706	ENSDART00000126243.2	80.84	5e-13	77.8
on.mrna.LG1.143.12	m.778	ENSDART00000126243.2	80.84	5e-13	77.8
on.mrna.LG1.143.13	m.667	ENSDART00000126243.2	80.84	6e-13	77.8
on.mrna.LG1.143.14	m.733	ENSDART00000126243.2	80.84	4e-13	77.8
on.mrna.LG1.143.15	m.772	ENSDART00000110069.3	96.55	0.0001	50.1
on.mrna.LG1.143.16	m.700	ENSDART00000126243.2	80.84	4e-13	77.8
on.mrna.LG1.143.17	m.760	ENSDART00000110069.3	96.55	0.0001	50.1
on.mrna.LG1.143.18	m.757	ENSDART00000126243.2	80.84	5e-13	77.8
on.mrna.LG1.143.19	m.694	ENSDART00000126243.2	80.84	5e-13	77.8
on.mrna.LG1.143.2	m.751	ENSDART00000126243.2	77.83	1e-17	93.7
on.mrna.LG1.143.20	m.718	ENSDART00000110069.3	96.55	0.0001	50.1
on.mrna.LG1.143.21	m.679	ENSDART00000126243.2	80.84	6e-13	77.8
on.mrna.LG1.143.22	m.739	ENSDART00000110069.3	96.55	0.0001	50.1
on.mrna.LG1.143.23	m.664	ENSDART00000126243.2	80.84	4e-13	77.8
on.mrna.LG1.143.24	m.652	ENSDART00000110069.3	96.55	8e-05	50.1
on.mrna.LG1.143.25	m.727	ENSDART00000110069.3	96.55	8e-05	50.1
on.mrna.LG1.143.26	m.676	ENSDART00000110069.3	96.55	8e-05	50.1
on.mrna.LG1.143.27	m.745	ENSDART00000110069.3	96.55	8e-05	50.1
on.mrna.LG1.143.28	m.754	ENSDART00000126243.2	77.83	9e-18	93.7
on.mrna.LG1.143.29	m.742	ENSDART00000126243.2	80.84	4e-13	77.8
on.mrna.LG1.143.3	m.724	ENSDART00000126243.2	77.83	9e-18	93.7
on.mrna.LG1.143.30	m.685	ENSDART00000126243.2	77.83	9e-18	93.7
on.mrna.LG1.143.31	m.709	ENSDART00000150989.2	77.93	5e-19	97.6
on.mrna.LG1.143.32	m.781	ENSDART00000126243.2	80.84	5e-13	77.8
on.mrna.LG1.143.33	m.790	ENSDART00000126243.2	80.84	4e-13	77.8
on.mrna.LG1.143.34	m.712	ENSDART00000126243.2	80.84	4e-13	77.8
on.mrna.LG1.143.35	m.688	ENSDART00000150989.2	77.93	5e-19	97.6
on.mrna.LG1.143.36	m.748	ENSDART00000126243.2	80.84	4e-13	77.8
on.mrna.LG1.143.37	m.673	ENSDART00000126243.2	80.84	5e-13	77.8
on.mrna.LG1.143.38	m.769	ENSDART00000126243.2	80.84	5e-13	77.8
on.mrna.LG1.143.39	m.655	ENSDART00000126243.2	80.84	4e-13	77.8
on.mrna.LG1.143.4	m.730	ENSDART00000126243.2	80.84	5e-13	77.8
on.mrna.LG1.143.40	m.691	ENSDART00000110069.3	96.55	8e-05	50.1
on.mrna.LG1.143.41	m.715	ENSDART00000126243.2	80.84	4e-13	77.8
on.mrna.LG1.143.42	m.787	ENSDART00000110069.3	96.55	8e-05	50.1
on.mrna.LG1.143.43	m.697	ENSDART00000126243.2	80.84	4e-13	77.8
on.mrna.LG1.143.44	m.703	ENSDART00000126243.2	80.84	5e-13	77.8
on.mrna.LG1.143.45	m.784	ENSDART00000110069.3	96.55	8e-05	50.1
on.mrna.LG1.143.46	m.763	ENSDART00000110069.3	96.55	8e-05	50.1
on.mrna.LG1.143.47	m.646	ENSDART00000110069.3	96.55	8e-05	50.1
on.mrna.LG1.143.48	m.736	ENSDART00000126243.2	80.84	4e-13	77.8
on.mrna.LG1.143.49	m.670	ENSDART00000110069.3	96.55	8e-05	50.1
on.mrna.LG1.143.5	m.661	ENSDART00000150989.2	77.93	6e-19	97.6
on.mrna.LG1.143.50	m.682	ENSDART00000110069.3	96.55	8e-05	50.1
on.mrna.LG1.143.51	m.793	ENSDART00000110069.3	96.55	8e-05	50.1
on.mrna.LG1.143.6	m.649	ENSDART00000126243.2	77.83	1e-17	93.7
on.mrna.LG1.143.7	m.766	ENSDART00000126243.2	80.84	6e-13	77.8
on.mrna.LG1.143.8	m.796	ENSDART00000126243.2	80.84	4e-13	77.8
on.mrna.LG1.143.9	m.775	ENSDART00000150989.2	77.93	5e-19	97.6
on.mrna.LG1.144.1	m.5956	ENSDART00000109552.2	83.21	2e-95	353
on.mrna.LG1.144.2	m.5932	ENSDART00000109552.2	83.21	2e-95	353
on.mrna.LG1.144.3	m.5948	ENSDART00000109552.2	83.62	2e-83	313
on.mrna.LG1.144.4	m.5972	ENSDART00000109552.2	83.41	7e-80	301
on.mrna.LG1.144.5	m.5964	ENSDART00000109552.2	83.89	5e-59	232
on.mrna.LG1.144.6	m.5940	ENSDART00000109552.2	83.21	2e-95	353
on.mrna.LG1.145.1	m.2002	ENSDART00000121431.1	79.07	7e-27	123
on.mrna.LG1.145.2	m.2001	ENSDART00000121431.1	79.07	7e-27	123
on.mrna.LG1.146.1	m.2662	ENSDART00000109344.3	84.96	4e-16	89.7
on.mrna.LG1.146.2	m.2644	ENSDART00000109344.3	84.96	4e-16	89.7
on.mrna.LG1.146.3	m.2653	ENSDART00000114222.3	82.09	4e-12	75.8
on.mrna.LG1.146.3	m.2654	ENSDART00000046670.8	100	4.3	34.2
on.mrna.LG1.1460001.1	m.891	ENSDART00000032342.7	100	1.4	34.2
on.mrna.LG1.147.1	m.90	ENSDART00000102118.4	80.6	5e-48	192
on.mrna.LG1.147.2	m.91	ENSDART00000077744.4	80.58	4e-45	182
on.mrna.LG1.148.1	m.1182	ENSDART00000037986.7	86.36	0.057	40.1
on.mrna.LG1.148.2	m.1185	ENSDART00000037986.7	85.11	0.17	38.2
on.mrna.LG1.148.3	m.1181	ENSDART00000162181.1	100	0.51	36.2
on.mrna.LG1.148.4	m.1184	ENSDART00000162181.1	100	0.51	36.2
on.mrna.LG1.149.1	m.352	ENSDART00000013066.7	83.44	0	930
on.mrna.LG1.149.2	m.353	ENSDART00000013066.7	83.36	0	888
on.mrna.LG1.15.1	m.2325	ENSDART00000092919.4	77.48	4e-44	180
on.mrna.LG1.15.2	m.2341	ENSDART00000092919.4	77.57	2e-46	188
on.mrna.LG1.15.3	m.2333	ENSDART00000092919.4	77.57	1e-46	188
on.mrna.LG1.15.4	m.2335	ENSDART00000092919.4	77.48	4e-44	180
on.mrna.LG1.15.5	m.2339	ENSDART00000092919.4	77.57	2e-46	188
on.mrna.LG1.15.6	m.2331	ENSDART00000092919.4	77.48	4e-44	180
on.mrna.LG1.15.7	m.2329	ENSDART00000092919.4	77.48	3e-44	180
on.mrna.LG1.15.8	m.2327	ENSDART00000092919.4	77.71	8e-42	172
on.mrna.LG1.15.9	m.2337	ENSDART00000092919.4	80.45	2e-36	155
on.mrna.LG1.150.1	m.5238	ENSDART00000144335.1	77.43	2e-15	85.7
on.mrna.LG1.150.2	m.5237	ENSDART00000144335.1	77.43	1e-15	85.7
on.mrna.LG1.151.1	m.2628	ENSDART00000168973.1	83.54	6e-23	111
on.mrna.LG1.152.1	m.3668	ENSDART00000128415.2	100	4.1	32.2
on.mrna.LG1.1520001.1	m.4103	ENSDART00000129392.2	100	0.27	36.2
on.mrna.LG1.1520002.1	m.2172	ENSDART00000129392.2	100	0.3	36.2
on.mrna.LG1.154.1	m.264	ENSDART00000122042.2	79.56	1e-07	60
on.mrna.LG1.155.1	m.5456	ENSDART00000025031.9	80.21	4e-34	147
on.mrna.LG1.1550001.1	m.5345	ENSDART00000092290.4	81.99	4e-58	228
on.mrna.LG1.1550002.1	m.3945	ENSDART00000092290.4	81.99	4e-58	228
on.mrna.LG1.156.1	m.4515	ENSDART00000088808.5	100	5.5	32.2
on.mrna.LG1.158.1	m.4733	ENSDART00000114432.3	100	0.082	38.2
on.mrna.LG1.1580001.1	m.470	ENSDART00000052912.6	80.84	1e-32	143
on.mrna.LG1.159.1	m.3351	ENSDART00000028955.4	79.18	4e-26	121
on.mrna.LG1.159.2	m.3347	ENSDART00000028955.4	87.32	9e-11	69.9
on.mrna.LG1.159.3	m.3349	ENSDART00000028955.4	86.36	1e-19	99.6
on.mrna.LG1.16.1	m.2838	ENSDART00000158160.1	82.31	9e-72	274
on.mrna.LG1.160.1	m.1578	ENSDART00000139900.3	88.7	3e-27	125
on.mrna.LG1.161.1	m.4823	ENSDART00000139900.3	78.34	3e-15	83.8
on.mrna.LG1.163.1	m.4270	ENSDART00000144330.3	94	6e-13	75.8
on.mrna.LG1.164.1	m.2359	ENSDART00000155592.2	83	2e-115	418
on.mrna.LG1.165.1	m.2897	ENSDART00000085980.4	95.45	2.4	36.2
on.mrna.LG1.166.1	m.886	ENSDART00000033980.6	84.93	0	706
on.mrna.LG1.166.2	m.876	ENSDART00000033980.6	84.79	8e-127	454
on.mrna.LG1.166.3	m.872	ENSDART00000033980.6	84.79	8e-127	454
on.mrna.LG1.166.4	m.888	ENSDART00000033980.6	84.79	8e-127	454
on.mrna.LG1.166.5	m.880	ENSDART00000033980.6	84.79	8e-127	454
on.mrna.LG1.166.6	m.882	ENSDART00000160139.1	83.56	2e-171	603
on.mrna.LG1.166.7	m.884	ENSDART00000160139.1	83.56	2e-171	603
on.mrna.LG1.166.8	m.878	ENSDART00000033980.6	84.62	2e-148	525
on.mrna.LG1.166.9	m.874	ENSDART00000033980.6	84.13	1e-72	274
on.mrna.LG1.1660001.1	m.4948	ENSDART00000168416.1	82.54	2e-175	617
on.mrna.LG1.167.1	m.4807	ENSDART00000087797.4	76.8	3e-18	95.6
on.mrna.LG1.168.1	m.5311	ENSDART00000160843.1	79.45	6e-145	515
on.mrna.LG1.168.2	m.5317	ENSDART00000160843.1	79.81	0	672
on.mrna.LG1.168.3	m.5307	ENSDART00000160843.1	79.68	3e-159	563
on.mrna.LG1.168.4	m.5313	ENSDART00000160843.1	79.81	0	672
on.mrna.LG1.169.1	m.5228	ENSDART00000124242.3	90.91	0.017	42.1
on.mrna.LG1.169.2	m.5227	ENSDART00000170880.1	95.65	0.19	38.2
on.mrna.LG1.17.1	m.281	ENSDART00000160072.1	77.66	4e-38	161
on.mrna.LG1.17.2	m.288	ENSDART00000160072.1	77.66	4e-38	161
on.mrna.LG1.17.3	m.292	ENSDART00000160072.1	77.7	3e-35	151
on.mrna.LG1.17.4	m.278	ENSDART00000160072.1	77.66	3e-38	161
on.mrna.LG1.17.5	m.285	ENSDART00000160072.1	77.66	3e-38	161
on.mrna.LG1.170.1	m.4896	ENSDART00000164081.1	78.99	3e-29	131
on.mrna.LG1.171.1	m.3483	ENSDART00000060968.6	81.58	3e-31	139
on.mrna.LG1.172.1	m.5369	ENSDART00000059861.6	81.61	5e-94	345
on.mrna.LG1.172.2	m.5370	ENSDART00000059861.6	81.23	9e-99	361
on.mrna.LG1.172.3	m.5371	ENSDART00000059861.6	80.34	3e-58	226
on.mrna.LG1.173.1	m.2161	ENSDART00000109529.3	79.9	2e-54	214
on.mrna.LG1.173.10	m.2153	ENSDART00000109529.3	79.9	2e-54	214
on.mrna.LG1.173.11	m.2149	ENSDART00000109529.3	80.3	7e-71	270
on.mrna.LG1.173.2	m.2157	ENSDART00000109529.3	80.3	4e-71	270
on.mrna.LG1.173.3	m.2163	ENSDART00000109529.3	80.3	7e-71	270
on.mrna.LG1.173.4	m.2155	ENSDART00000109529.3	80.3	7e-71	270
on.mrna.LG1.173.5	m.2151	ENSDART00000109529.3	80.3	5e-71	270
on.mrna.LG1.173.6	m.2169	ENSDART00000109529.3	80.3	5e-71	270
on.mrna.LG1.173.7	m.2167	ENSDART00000109529.3	80.3	7e-71	270
on.mrna.LG1.173.8	m.2159	ENSDART00000109529.3	80.3	7e-71	270
on.mrna.LG1.173.9	m.2165	ENSDART00000109529.3	80.3	7e-71	270
on.mrna.LG1.175.1	m.521	ENSDART00000081743.5	86.36	1e-13	79.8
on.mrna.LG1.175.1	m.522	ENSDART00000081743.5	86.36	1e-13	79.8
on.mrna.LG1.176.1	m.412	ENSDART00000109615.4	95.65	0.3	38.2
on.mrna.LG1.176.2	m.416	ENSDART00000109615.4	95.65	0.3	38.2
on.mrna.LG1.177.1	m.987	ENSDART00000010092.6	80.2	5e-53	210
on.mrna.LG1.178.1	m.854	ENSDART00000098627.4	79.84	2e-49	198
on.mrna.LG1.179.1	m.5596	ENSDART00000092524.5	80.58	0	765
on.mrna.LG1.179.2	m.5597	ENSDART00000092524.5	81.4	0	1269
on.mrna.LG1.18.1	m.968	ENSDART00000162777.1	83.98	2e-108	394
on.mrna.LG1.180.1	m.1905	ENSDART00000112730.3	80.13	8e-177	622
on.mrna.LG1.180.2	m.1908	ENSDART00000112730.3	80.13	8e-177	622
on.mrna.LG1.180.3	m.1914	ENSDART00000112730.3	80.13	8e-177	622
on.mrna.LG1.180.4	m.1911	ENSDART00000112730.3	80.13	8e-177	622
on.mrna.LG1.181.1	m.5042	ENSDART00000114831.3	80.53	6e-05	50.1
on.mrna.LG1.182.1	m.1041	ENSDART00000114831.3	81	0.0001	48.1
on.mrna.LG1.182.2	m.1043	ENSDART00000114831.3	81	0.0002	48.1
on.mrna.LG1.183.1	m.3525	ENSDART00000152684.2	89.23	3e-12	73.8
on.mrna.LG1.184.1	m.5639	ENSDART00000031635.5	82.13	3e-34	149
on.mrna.LG1.184.2	m.5648	ENSDART00000031635.5	82.13	2e-34	149
on.mrna.LG1.184.3	m.5653	ENSDART00000144406.2	77.45	1e-26	123
on.mrna.LG1.184.4	m.5644	ENSDART00000144406.2	88.18	3e-24	115
on.mrna.LG1.185.1	m.4041	ENSDART00000108579.4	81.66	3e-72	274
on.mrna.LG1.186.1	m.3604	ENSDART00000144606.2	97.44	9e-11	69.9
on.mrna.LG1.187.1	m.350	ENSDART00000081945.3	83.12	4e-50	198
on.mrna.LG1.188.1	m.2625	ENSDART00000020327.8	94.23	5e-14	79.8
on.mrna.LG1.189.1	m.5339	ENSDART00000063150.4	100	0.011	42.1
on.mrna.LG1.19.1	m.13	ENSDART00000098904.3	84.09	4e-47	190
on.mrna.LG1.19.1	m.14	ENSDART00000098904.3	84.09	3e-47	190
on.mrna.LG1.19.2	m.10	ENSDART00000098904.3	84.09	3e-47	190
on.mrna.LG1.19.2	m.9	ENSDART00000098904.3	84.09	4e-47	190
on.mrna.LG1.19.3	m.5	ENSDART00000098904.3	84.09	4e-47	190
on.mrna.LG1.19.3	m.6	ENSDART00000098904.3	84.09	3e-47	190
on.mrna.LG1.19.4	m.1	ENSDART00000098904.3	84.09	4e-47	190
on.mrna.LG1.19.4	m.2	ENSDART00000098904.3	84.09	3e-47	190
on.mrna.LG1.190.1	m.4255	ENSDART00000084069.4	100	0.15	38.2
on.mrna.LG1.190.2	m.4259	ENSDART00000084069.4	100	0.23	38.2
on.mrna.LG1.190.2	m.4260	ENSDART00000084069.4	100	0.13	38.2
on.mrna.LG1.190.3	m.4261	ENSDART00000084069.4	100	0.15	38.2
on.mrna.LG1.190.4	m.4257	ENSDART00000084069.4	100	0.23	38.2
on.mrna.LG1.190.4	m.4258	ENSDART00000084069.4	100	0.13	38.2
on.mrna.LG1.192.1	m.2760	ENSDART00000168816.1	88.42	3e-20	101
on.mrna.LG1.193.1	m.4521	ENSDART00000126093.2	81.69	6e-37	157
on.mrna.LG1.194.1	m.1106	ENSDART00000132379.1	86.08	2e-10	69.9
on.mrna.LG1.194.10	m.1167	ENSDART00000132379.1	86.08	2e-10	69.9
on.mrna.LG1.194.11	m.1147	ENSDART00000132379.1	86.08	2e-10	69.9
on.mrna.LG1.194.12	m.1111	ENSDART00000132379.1	86.08	2e-10	69.9
on.mrna.LG1.194.13	m.1117	ENSDART00000132379.1	86.08	2e-10	69.9
on.mrna.LG1.194.14	m.1101	ENSDART00000132379.1	86.08	2e-10	69.9
on.mrna.LG1.194.15	m.1169	ENSDART00000132379.1	86.08	2e-10	69.9
on.mrna.LG1.194.16	m.1093	ENSDART00000132379.1	86.08	2e-10	69.9
on.mrna.LG1.194.17	m.1071	ENSDART00000132379.1	86.08	2e-10	69.9
on.mrna.LG1.194.18	m.1082	ENSDART00000132379.1	86.08	2e-10	69.9
on.mrna.LG1.194.19	m.1094	ENSDART00000132379.1	86.08	2e-10	69.9
on.mrna.LG1.194.2	m.1084	ENSDART00000132379.1	86.08	2e-10	69.9
on.mrna.LG1.194.20	m.1080	ENSDART00000132379.1	86.08	2e-10	69.9
on.mrna.LG1.194.21	m.1139	ENSDART00000132379.1	86.08	2e-10	69.9
on.mrna.LG1.194.22	m.1098	ENSDART00000132379.1	86.08	2e-10	69.9
on.mrna.LG1.194.23	m.1158	ENSDART00000132379.1	86.08	2e-10	69.9
on.mrna.LG1.194.24	m.1120	ENSDART00000132379.1	86.08	2e-10	69.9
on.mrna.LG1.194.25	m.1170	ENSDART00000132379.1	86.08	2e-10	69.9
on.mrna.LG1.194.26	m.1109	ENSDART00000132379.1	86.08	2e-10	69.9
on.mrna.LG1.194.27	m.1154	ENSDART00000132379.1	86.08	2e-10	69.9
on.mrna.LG1.194.28	m.1137	ENSDART00000132379.1	86.08	2e-10	69.9
on.mrna.LG1.194.29	m.1128	ENSDART00000132379.1	86.08	2e-10	69.9
on.mrna.LG1.194.3	m.1151	ENSDART00000132379.1	86.08	2e-10	69.9
on.mrna.LG1.194.30	m.1075	ENSDART00000132379.1	86.08	2e-10	69.9
on.mrna.LG1.194.31	m.1089	ENSDART00000132379.1	86.08	2e-10	69.9
on.mrna.LG1.194.32	m.1133	ENSDART00000132379.1	86.08	2e-10	69.9
on.mrna.LG1.194.33	m.1069	ENSDART00000132379.1	86.08	2e-10	69.9
on.mrna.LG1.194.34	m.1172	ENSDART00000132379.1	86.08	2e-10	69.9
on.mrna.LG1.194.35	m.1144	ENSDART00000132379.1	86.08	2e-10	69.9
on.mrna.LG1.194.36	m.1118	ENSDART00000132379.1	86.08	2e-10	69.9
on.mrna.LG1.194.37	m.1073	ENSDART00000132379.1	86.08	2e-10	69.9
on.mrna.LG1.194.38	m.1091	ENSDART00000132379.1	86.08	2e-10	69.9
on.mrna.LG1.194.39	m.1122	ENSDART00000132379.1	86.08	2e-10	69.9
on.mrna.LG1.194.4	m.1160	ENSDART00000132379.1	86.08	2e-10	69.9
on.mrna.LG1.194.40	m.1113	ENSDART00000132379.1	86.08	2e-10	69.9
on.mrna.LG1.194.41	m.1143	ENSDART00000132379.1	86.08	2e-10	69.9
on.mrna.LG1.194.42	m.1100	ENSDART00000132379.1	86.08	2e-10	69.9
on.mrna.LG1.194.43	m.1166	ENSDART00000132379.1	86.08	2e-10	69.9
on.mrna.LG1.194.44	m.1126	ENSDART00000132379.1	86.08	2e-10	69.9
on.mrna.LG1.194.45	m.1116	ENSDART00000132379.1	86.08	2e-10	69.9
on.mrna.LG1.194.46	m.1079	ENSDART00000132379.1	86.08	2e-10	69.9
on.mrna.LG1.194.47	m.1096	ENSDART00000132379.1	86.08	2e-10	69.9
on.mrna.LG1.194.48	m.1156	ENSDART00000132379.1	86.08	2e-10	69.9
on.mrna.LG1.194.49	m.1087	ENSDART00000132379.1	86.08	2e-10	69.9
on.mrna.LG1.194.5	m.1102	ENSDART00000132379.1	86.08	2e-10	69.9
on.mrna.LG1.194.50	m.1104	ENSDART00000132379.1	86.08	2e-10	69.9
on.mrna.LG1.194.51	m.1077	ENSDART00000132379.1	86.08	2e-10	69.9
on.mrna.LG1.194.52	m.1163	ENSDART00000132379.1	86.08	2e-10	69.9
on.mrna.LG1.194.53	m.1130	ENSDART00000132379.1	86.08	2e-10	69.9
on.mrna.LG1.194.54	m.1145	ENSDART00000132379.1	86.08	2e-10	69.9
on.mrna.LG1.194.55	m.1141	ENSDART00000132379.1	86.08	2e-10	69.9
on.mrna.LG1.194.6	m.1124	ENSDART00000132379.1	86.08	2e-10	69.9
on.mrna.LG1.194.7	m.1135	ENSDART00000132379.1	86.08	2e-10	69.9
on.mrna.LG1.194.8	m.1149	ENSDART00000132379.1	86.08	2e-10	69.9
on.mrna.LG1.194.9	m.1114	ENSDART00000132379.1	86.08	2e-10	69.9
on.mrna.LG1.1940001.1	m.863	ENSDART00000075584.4	77.73	7e-07	56
on.mrna.LG1.195.1	m.4241	ENSDART00000114975.3	81.53	3e-14	81.8
on.mrna.LG1.196.1	m.3522	ENSDART00000046094.5	81.74	1e-66	254
on.mrna.LG1.196.2	m.3523	ENSDART00000046094.5	81.74	1e-66	254
on.mrna.LG1.197.1	m.3329	ENSDART00000169242.1	88	2e-28	129
on.mrna.LG1.197.1	m.3337	ENSDART00000042984.6	85.44	4e-16	85.7
on.mrna.LG1.197.2	m.3338	ENSDART00000169242.1	88	2e-28	129
on.mrna.LG1.197.2	m.3344	ENSDART00000042984.6	85.44	5e-16	85.7
on.mrna.LG1.1970001.1	m.3307	ENSDART00000131664.2	96.3	0.001	46.1
on.mrna.LG1.1970001.2	m.3308	ENSDART00000131664.2	96.3	0.001	46.1
on.mrna.LG1.198.1	m.4123	ENSDART00000016417.8	87.8	1e-65	250
on.mrna.LG1.198.1	m.4124	ENSDART00000016417.8	87.8	1e-65	250
on.mrna.LG1.198.2	m.4120	ENSDART00000016417.8	87.8	1e-65	250
on.mrna.LG1.198.2	m.4121	ENSDART00000016417.8	87.8	1e-65	250
on.mrna.LG1.198.3	m.4117	ENSDART00000016417.8	87.8	1e-65	250
on.mrna.LG1.198.3	m.4118	ENSDART00000016417.8	87.8	1e-65	250
on.mrna.LG1.199.1	m.965	ENSDART00000073735.2	81.02	1e-64	248
on.mrna.LG1.199.2	m.966	ENSDART00000073735.2	81.46	3e-52	206
on.mrna.LG1.199.3	m.967	ENSDART00000073735.2	81.02	1e-64	248
on.mrna.LG1.2.1	m.5423	ENSDART00000084530.5	80.25	8e-60	232
on.mrna.LG1.2.2	m.5421	ENSDART00000084530.5	78.69	1e-74	281
on.mrna.LG1.2.3	m.5424	ENSDART00000084530.5	78.69	1e-74	281
on.mrna.LG1.20.1	m.4605	ENSDART00000067514.5	83.03	2e-96	353
on.mrna.LG1.20.10	m.4607	ENSDART00000067514.5	83.03	8e-84	311
on.mrna.LG1.20.11	m.4603	ENSDART00000067514.5	83.03	8e-84	311
on.mrna.LG1.20.12	m.4599	ENSDART00000006619.7	88.26	9e-74	278
on.mrna.LG1.20.13	m.4594	ENSDART00000067514.5	82.81	3e-26	119
on.mrna.LG1.20.14	m.4598	ENSDART00000067514.5	83.53	6e-25	115
on.mrna.LG1.20.2	m.4596	ENSDART00000067514.5	83.03	2e-96	353
on.mrna.LG1.20.3	m.4604	ENSDART00000067514.5	83.03	2e-96	353
on.mrna.LG1.20.4	m.4597	ENSDART00000067514.5	83.03	6e-84	311
on.mrna.LG1.20.5	m.4606	ENSDART00000067514.5	83.03	5e-84	311
on.mrna.LG1.20.6	m.4602	ENSDART00000067514.5	83.03	8e-84	311
on.mrna.LG1.20.7	m.4595	ENSDART00000067514.5	83.03	2e-96	353
on.mrna.LG1.20.8	m.4600	ENSDART00000067514.5	83.53	5e-25	115
on.mrna.LG1.20.9	m.4601	ENSDART00000067514.5	83.53	5e-25	115
on.mrna.LG1.200.1	m.3997	ENSDART00000011304.7	100	0.14	40.1
on.mrna.LG1.200.1	m.3998	ENSDART00000011304.7	100	0.14	40.1
on.mrna.LG1.200.2	m.4004	ENSDART00000011304.7	100	0.12	40.1
on.mrna.LG1.200.2	m.4005	ENSDART00000011304.7	100	0.12	40.1
on.mrna.LG1.200.3	m.4011	ENSDART00000011304.7	100	0.1	40.1
on.mrna.LG1.200.3	m.4012	ENSDART00000011304.7	100	0.1	40.1
on.mrna.LG1.201.1	m.3705	ENSDART00000066380.5	88.89	0.035	40.1
on.mrna.LG1.201.2	m.3704	ENSDART00000066380.5	88.89	0.043	40.1
on.mrna.LG1.202.1	m.230	ENSDART00000019270.7	80.75	4e-78	293
on.mrna.LG1.202.2	m.227	ENSDART00000019270.7	81.06	2e-42	174
on.mrna.LG1.202.3	m.232	ENSDART00000019270.7	80.75	3e-78	293
on.mrna.LG1.202.4	m.229	ENSDART00000019270.7	80.75	2e-78	293
on.mrna.LG1.203.1	m.2549	ENSDART00000098976.3	91.18	0.006	44.1
on.mrna.LG1.204.1	m.1422	ENSDART00000037850.7	79.74	1e-111	404
on.mrna.LG1.204.2	m.1426	ENSDART00000037850.7	79.74	1e-111	404
on.mrna.LG1.204.3	m.1424	ENSDART00000037850.7	79.74	1e-111	404
on.mrna.LG1.205.1	m.423	ENSDART00000005033.9	83.12	3e-05	50.1
on.mrna.LG1.206.1	m.3602	ENSDART00000012457.6	100	1.1	34.2
on.mrna.LG1.206.2	m.3603	ENSDART00000012457.6	100	1.4	34.2
on.mrna.LG1.207.1	m.5850	ENSDART00000149478.2	78.42	7e-24	113
on.mrna.LG1.208.1	m.1961	ENSDART00000171736.1	82.2	8e-61	234
on.mrna.LG1.208.2	m.1959	ENSDART00000171736.1	81.63	4e-37	155
on.mrna.LG1.209.1	m.3762	ENSDART00000021009.8	80.86	2e-83	311
on.mrna.LG1.209.2	m.3759	ENSDART00000021009.8	84.26	8e-77	289
on.mrna.LG1.209.3	m.3765	ENSDART00000021009.8	84.26	7e-77	289
on.mrna.LG1.209.4	m.3756	ENSDART00000021009.8	80.86	2e-83	311
on.mrna.LG1.21.1	m.1045	ENSDART00000067512.6	82.91	4e-138	492
on.mrna.LG1.210.1	m.5033	ENSDART00000082780.5	81.3	8e-27	123
on.mrna.LG1.210.2	m.5031	ENSDART00000082780.5	81.3	8e-27	123
on.mrna.LG1.211.1	m.5800	ENSDART00000098453.3	78.45	4e-14	81.8
on.mrna.LG1.211.2	m.5796	ENSDART00000098453.3	81.59	3e-21	105
on.mrna.LG1.212.1	m.1712	ENSDART00000098438.4	81.35	0	946
on.mrna.LG1.213.1	m.4661	ENSDART00000073594.4	83.77	0	842
on.mrna.LG1.215.1	m.484	ENSDART00000112483.3	85.27	2e-21	105
on.mrna.LG1.216.1	m.4128	ENSDART00000098430.2	84.62	9e-23	109
on.mrna.LG1.217.1	m.2083	ENSDART00000020851.8	84.06	7e-20	99.6
on.mrna.LG1.219.1	m.3185	ENSDART00000073597.3	96.15	0.002	44.1
on.mrna.LG1.22.1	m.3984	ENSDART00000148995.1	79.15	8e-32	139
on.mrna.LG1.220.1	m.2754	ENSDART00000073596.6	82.42	7e-97	355
on.mrna.LG1.220.2	m.2757	ENSDART00000073596.6	82.42	8e-97	355
on.mrna.LG1.220.3	m.2756	ENSDART00000073596.6	82.42	6e-97	355
on.mrna.LG1.221.1	m.2427	ENSDART00000004782.7	79.57	5e-50	200
on.mrna.LG1.222.1	m.3400	ENSDART00000066806.5	88.14	1e-08	61.9
on.mrna.LG1.222.2	m.3399	ENSDART00000066806.5	88.14	9e-09	61.9
on.mrna.LG1.222.3	m.3401	ENSDART00000066806.5	88.14	8e-09	61.9
on.mrna.LG1.223.1	m.5884	ENSDART00000027329.7	81.13	4e-60	232
on.mrna.LG1.223.2	m.5883	ENSDART00000027329.7	81.13	4e-60	232
on.mrna.LG1.224.1	m.5185	ENSDART00000029646.6	91.55	2e-18	93.7
on.mrna.LG1.224.2	m.5187	ENSDART00000029646.6	91.55	1e-18	93.7
on.mrna.LG1.225.1	m.991	ENSDART00000035710.5	83.99	2e-105	383
on.mrna.LG1.225.2	m.989	ENSDART00000035710.5	83.99	2e-105	383
on.mrna.LG1.226.1	m.192	ENSDART00000014843.5	89.74	8e-155	547
on.mrna.LG1.226.2	m.187	ENSDART00000014843.5	89.74	9e-155	547
on.mrna.LG1.226.3	m.191	ENSDART00000014843.5	89.74	8e-155	547
on.mrna.LG1.226.4	m.190	ENSDART00000014843.5	89.74	8e-155	547
on.mrna.LG1.226.5	m.188	ENSDART00000014843.5	89.74	8e-155	547
on.mrna.LG1.226.6	m.189	ENSDART00000014843.5	89.74	8e-155	547
on.mrna.LG1.227.1	m.3031	ENSDART00000023568.9	77.44	1e-23	113
on.mrna.LG1.227.2	m.3029	ENSDART00000023568.9	77.44	1e-23	113
on.mrna.LG1.228.1	m.1994	ENSDART00000123463.2	87.9	2e-38	161
on.mrna.LG1.228.2	m.1991	ENSDART00000123463.2	87.9	2e-38	161
on.mrna.LG1.228.3	m.1988	ENSDART00000123463.2	87.9	3e-38	161
on.mrna.LG1.228.4	m.1985	ENSDART00000123463.2	87.9	3e-38	161
on.mrna.LG1.23.1	m.5585	ENSDART00000067510.4	81.85	2e-36	153
on.mrna.LG1.230.1	m.1241	ENSDART00000087055.5	100	3.1	34.2
on.mrna.LG1.230.1	m.1242	ENSDART00000087055.5	100	3.1	34.2
on.mrna.LG1.232.1	m.4891	ENSDART00000029262.7	100	0.74	36.2
on.mrna.LG1.233.1	m.3354	ENSDART00000085419.4	90.14	3e-15	85.7
on.mrna.LG1.234.1	m.4170	ENSDART00000122506.2	77.49	1e-82	309
on.mrna.LG1.234.2	m.4174	ENSDART00000122506.2	77.49	1e-82	309
on.mrna.LG1.2340001.1	m.3682	ENSDART00000135239.2	100	0.08	38.2
on.mrna.LG1.235.1	m.3993	ENSDART00000162579.1	100	1.3	34.2
on.mrna.LG1.236.1	m.2499	ENSDART00000161495.1	100	0.011	42.1
on.mrna.LG1.236.2	m.2503	ENSDART00000166797.1	100	0.004	44.1
on.mrna.LG1.236.3	m.2501	ENSDART00000166797.1	100	0.004	44.1
on.mrna.LG1.236.4	m.2505	ENSDART00000166797.1	100	0.004	44.1
on.mrna.LG1.236.5	m.2507	ENSDART00000166797.1	100	0.004	44.1
on.mrna.LG1.237.1	m.305	ENSDART00000126565.3	85.61	2e-23	111
on.mrna.LG1.238.1	m.1427	ENSDART00000173808.1	88.89	8e-05	50.1
on.mrna.LG1.239.1	m.3833	ENSDART00000099871.4	91.35	2e-30	135
on.mrna.LG1.239.2	m.3826	ENSDART00000099871.4	91.35	2e-30	135
on.mrna.LG1.239.3	m.3840	ENSDART00000099871.4	91.35	2e-30	135
on.mrna.LG1.240.1	m.532	ENSDART00000099919.4	80.54	3e-92	341
on.mrna.LG1.240.2	m.535	ENSDART00000099919.4	80.54	3e-92	341
on.mrna.LG1.242.1	m.5575	ENSDART00000111388.4	84.25	2e-22	107
on.mrna.LG1.243.1	m.1557	ENSDART00000028607.8	100	0.33	36.2
on.mrna.LG1.244.1	m.3524	ENSDART00000075398.6	78.23	3e-77	291
on.mrna.LG1.245.1	m.5330	ENSDART00000124820.3	93.18	2e-08	63.9
on.mrna.LG1.245.1	m.5331	ENSDART00000075943.5	100	0.97	36.2
on.mrna.LG1.245.2	m.5321	ENSDART00000124820.3	93.18	2e-08	63.9
on.mrna.LG1.245.2	m.5322	ENSDART00000075943.5	100	0.97	36.2
on.mrna.LG1.246.1	m.2240	ENSDART00000085505.6	81.59	1e-90	335
on.mrna.LG1.246.2	m.2241	ENSDART00000085505.6	81.59	1e-90	335
on.mrna.LG1.246.3	m.2242	ENSDART00000085505.6	81.59	1e-90	335
on.mrna.LG1.246.4	m.2244	ENSDART00000085505.6	81.59	1e-90	335
on.mrna.LG1.246.5	m.2243	ENSDART00000085505.6	81.59	1e-90	335
on.mrna.LG1.248.1	m.2570	ENSDART00000114148.4	80.87	2e-41	170
on.mrna.LG1.249.1	m.354	ENSDART00000169462.2	81.74	1e-48	196
on.mrna.LG1.249.2	m.359	ENSDART00000169462.2	84.12	2e-40	168
on.mrna.LG1.249.3	m.362	ENSDART00000169462.2	90.08	6e-37	157
on.mrna.LG1.25.1	m.2353	ENSDART00000083539.5	79.24	3e-50	202
on.mrna.LG1.25.1	m.2354	ENSDART00000167453.1	79.82	1e-76	289
on.mrna.LG1.250.1	m.1645	ENSDART00000173937.1	85.07	7e-90	333
on.mrna.LG1.250.2	m.1633	ENSDART00000108721.3	85.49	7e-118	426
on.mrna.LG1.250.3	m.1649	ENSDART00000173937.1	85.07	7e-90	333
on.mrna.LG1.250.4	m.1637	ENSDART00000173937.1	85.07	6e-90	333
on.mrna.LG1.250.5	m.1641	ENSDART00000173937.1	85.07	5e-90	333
on.mrna.LG1.251.1	m.4939	ENSDART00000155992.2	80.98	1e-39	165
on.mrna.LG1.251.2	m.4938	ENSDART00000108721.3	82.23	5e-32	139
on.mrna.LG1.252.1	m.2482	ENSDART00000075421.4	79.66	6e-42	172
on.mrna.LG1.252.2	m.2481	ENSDART00000075421.4	79.26	3e-34	147
on.mrna.LG1.253.1	m.450	ENSDART00000085661.5	88.82	9e-43	176
on.mrna.LG1.253.1	m.456	ENSDART00000085661.5	87.16	2e-33	143
on.mrna.LG1.253.2	m.463	ENSDART00000085661.5	88.82	9e-43	176
on.mrna.LG1.253.2	m.469	ENSDART00000085661.5	87.16	2e-33	143
on.mrna.LG1.253.3	m.457	ENSDART00000085661.5	88.82	9e-43	176
on.mrna.LG1.253.3	m.462	ENSDART00000085661.5	87.16	2e-33	143
on.mrna.LG1.253.4	m.443	ENSDART00000085661.5	88.82	9e-43	176
on.mrna.LG1.253.4	m.449	ENSDART00000085661.5	87.16	2e-33	143
on.mrna.LG1.253.5	m.436	ENSDART00000085661.5	88.82	9e-43	176
on.mrna.LG1.253.5	m.442	ENSDART00000085661.5	87.16	2e-33	143
on.mrna.LG1.254.1	m.4421	ENSDART00000093003.5	87.14	3e-10	67.9
on.mrna.LG1.254.1	m.4422	ENSDART00000093003.5	87.14	3e-10	67.9
on.mrna.LG1.254.2	m.4403	ENSDART00000171777.2	86.46	3e-42	174
on.mrna.LG1.254.2	m.4404	ENSDART00000171777.2	86.46	3e-42	174
on.mrna.LG1.254.3	m.4409	ENSDART00000171777.2	86.46	2e-42	174
on.mrna.LG1.254.3	m.4410	ENSDART00000171777.2	86.46	2e-42	174
on.mrna.LG1.254.4	m.4415	ENSDART00000171777.2	86.46	2e-42	174
on.mrna.LG1.254.4	m.4416	ENSDART00000171777.2	86.46	2e-42	174
on.mrna.LG1.254.5	m.4397	ENSDART00000171777.2	86.46	2e-42	174
on.mrna.LG1.254.5	m.4398	ENSDART00000171777.2	86.46	2e-42	174
on.mrna.LG1.255.1	m.1804	ENSDART00000091616.7	84.44	4e-41	168
on.mrna.LG1.255.2	m.1806	ENSDART00000091616.7	84.44	4e-41	168
on.mrna.LG1.255.3	m.1805	ENSDART00000091616.7	84.44	4e-41	168
on.mrna.LG1.256.1	m.5384	ENSDART00000049230.7	96.55	8e-05	50.1
on.mrna.LG1.256.2	m.5398	ENSDART00000049230.7	96.55	8e-05	50.1
on.mrna.LG1.256.3	m.5395	ENSDART00000049230.7	96.55	8e-05	50.1
on.mrna.LG1.256.4	m.5391	ENSDART00000044574.8	95.83	0.049	40.1
on.mrna.LG1.256.5	m.5401	ENSDART00000044574.8	95.83	0.057	40.1
on.mrna.LG1.256.6	m.5387	ENSDART00000044574.8	95.83	0.063	40.1
on.mrna.LG1.256.7	m.5388	ENSDART00000049230.7	96.55	8e-05	50.1
on.mrna.LG1.256.8	m.5392	ENSDART00000049230.7	96.55	8e-05	50.1
on.mrna.LG1.257.1	m.1053	ENSDART00000091567.5	79.35	0	654
on.mrna.LG1.257.2	m.1055	ENSDART00000166318.1	79.23	0	704
on.mrna.LG1.257.3	m.1058	ENSDART00000166318.1	79.47	0	702
on.mrna.LG1.2570001.1	m.1015	ENSDART00000090675.4	100	0.007	42.1
on.mrna.LG1.258.1	m.3515	ENSDART00000079165.5	81	0	1011
on.mrna.LG1.259.1	m.5518	ENSDART00000124363.3	86.06	2e-63	244
on.mrna.LG1.26.1	m.1807	ENSDART00000126397.3	82.69	2e-09	63.9
on.mrna.LG1.260.1	m.5016	ENSDART00000101018.5	82.48	3e-14	81.8
on.mrna.LG1.260.2	m.5012	ENSDART00000101018.5	82.48	3e-14	81.8
on.mrna.LG1.260.3	m.5015	ENSDART00000101018.5	82.48	3e-14	81.8
on.mrna.LG1.260.4	m.5013	ENSDART00000101018.5	82.48	3e-14	81.8
on.mrna.LG1.260.5	m.5010	ENSDART00000101018.5	82.48	3e-14	81.8
on.mrna.LG1.260.6	m.5014	ENSDART00000101018.5	82.48	3e-14	81.8
on.mrna.LG1.260.7	m.5011	ENSDART00000101018.5	82.48	3e-14	81.8
on.mrna.LG1.261.1	m.4043	ENSDART00000052731.6	87.85	2e-23	109
on.mrna.LG1.261.2	m.4044	ENSDART00000052731.6	80.83	2e-132	474
on.mrna.LG1.261.3	m.4047	ENSDART00000052731.6	80.83	2e-132	474
on.mrna.LG1.262.1	m.3236	ENSDART00000110605.3	88.54	1e-51	206
on.mrna.LG1.262.10	m.3221	ENSDART00000110605.3	88.54	1e-51	206
on.mrna.LG1.262.11	m.3241	ENSDART00000110605.3	90.97	2e-44	182
on.mrna.LG1.262.12	m.3215	ENSDART00000110605.3	90.97	2e-44	182
on.mrna.LG1.262.13	m.3219	ENSDART00000110605.3	79.27	3e-26	121
on.mrna.LG1.262.14	m.3217	ENSDART00000110605.3	79.27	4e-26	121
on.mrna.LG1.262.15	m.3213	ENSDART00000110605.3	86.84	2e-11	71.9
on.mrna.LG1.262.2	m.3228	ENSDART00000110605.3	88.54	1e-51	206
on.mrna.LG1.262.3	m.3211	ENSDART00000110605.3	88.54	1e-51	206
on.mrna.LG1.262.4	m.3225	ENSDART00000110605.3	88.54	1e-51	206
on.mrna.LG1.262.5	m.3230	ENSDART00000110605.3	88.54	1e-51	206
on.mrna.LG1.262.6	m.3246	ENSDART00000110605.3	88.54	1e-51	206
on.mrna.LG1.262.7	m.3243	ENSDART00000110605.3	88.54	2e-51	206
on.mrna.LG1.262.8	m.3233	ENSDART00000110605.3	88.54	2e-51	206
on.mrna.LG1.262.9	m.3223	ENSDART00000110605.3	88.54	1e-51	206
on.mrna.LG1.263.1	m.2575	ENSDART00000100998.3	80.97	0	706
on.mrna.LG1.263.2	m.2584	ENSDART00000100998.3	80.97	0	706
on.mrna.LG1.263.3	m.2581	ENSDART00000100998.3	81.13	0	728
on.mrna.LG1.263.4	m.2572	ENSDART00000100998.3	80.97	0	706
on.mrna.LG1.263.5	m.2578	ENSDART00000100998.3	80.97	0	706
on.mrna.LG1.264.1	m.2960	ENSDART00000168888.1	95.24	1.2	34.2
on.mrna.LG1.265.1	m.2298	ENSDART00000134848.2	100	0.022	42.1
on.mrna.LG1.265.2	m.2278	ENSDART00000134848.2	100	0.014	42.1
on.mrna.LG1.265.3	m.2268	ENSDART00000134848.2	100	0.02	42.1
on.mrna.LG1.265.3	m.2269	ENSDART00000157410.1	100	0.94	36.2
on.mrna.LG1.265.4	m.2288	ENSDART00000134848.2	100	0.014	42.1
on.mrna.LG1.266.1	m.593	ENSDART00000173932.1	81.8	7e-149	529
on.mrna.LG1.267.1	m.1405	ENSDART00000079042.6	82.91	0	1764
on.mrna.LG1.267.2	m.1378	ENSDART00000079042.6	83.09	0	1671
on.mrna.LG1.267.3	m.1389	ENSDART00000079042.6	82.92	0	1727
on.mrna.LG1.267.4	m.1416	ENSDART00000079042.6	83.09	0	1671
on.mrna.LG1.267.5	m.1384	ENSDART00000079042.6	82.91	0	1764
on.mrna.LG1.267.6	m.1399	ENSDART00000079042.6	83.09	0	1671
on.mrna.LG1.267.7	m.1394	ENSDART00000079042.6	82.92	0	1727
on.mrna.LG1.267.8	m.1410	ENSDART00000079042.6	83.09	0	1671
on.mrna.LG1.268.1	m.3449	ENSDART00000052656.5	84.39	4e-125	448
on.mrna.LG1.268.2	m.3451	ENSDART00000052656.5	84.9	7e-86	317
on.mrna.LG1.268.3	m.3452	ENSDART00000052656.5	84.9	7e-86	317
on.mrna.LG1.269.1	m.4740	ENSDART00000089574.6	88.37	3e-17	91.7
on.mrna.LG1.269.2	m.4736	ENSDART00000089574.6	88.37	3e-17	91.7
on.mrna.LG1.269.3	m.4738	ENSDART00000089574.6	85.54	8e-11	69.9
on.mrna.LG1.269.4	m.4734	ENSDART00000089574.6	88.71	2e-10	67.9
on.mrna.LG1.27.1	m.2486	ENSDART00000174354.1	84.33	0	1233
on.mrna.LG1.27.2	m.2496	ENSDART00000111161.3	83.97	0	1039
on.mrna.LG1.27.3	m.2491	ENSDART00000174354.1	84.33	0	1233
on.mrna.LG1.270.1	m.1953	ENSDART00000159759.1	100	1.3	36.2
on.mrna.LG1.270.1	m.1954	ENSDART00000088383.6	100	3	34.2
on.mrna.LG1.271.1	m.3455	ENSDART00000044208.5	93.61	0	646
on.mrna.LG1.271.2	m.3453	ENSDART00000044208.5	93.8	0	698
on.mrna.LG1.2710001.1	m.5904	ENSDART00000106188.5	100	4.6	32.2
on.mrna.LG1.272.1	m.3378	ENSDART00000023653.8	100	0.22	38.2
on.mrna.LG1.272.2	m.3373	ENSDART00000023653.8	100	0.29	38.2
on.mrna.LG1.273.1	m.3402	ENSDART00000054368.4	81.38	0	724
on.mrna.LG1.274.1	m.4026	ENSDART00000028887.6	83.57	2e-62	240
on.mrna.LG1.275.1	m.327	ENSDART00000054366.7	81.5	9e-89	329
on.mrna.LG1.275.2	m.334	ENSDART00000054366.7	82.47	1e-34	149
on.mrna.LG1.275.3	m.323	ENSDART00000054366.7	81.82	4e-104	381
on.mrna.LG1.275.4	m.330	ENSDART00000054366.7	81.82	3e-104	381
on.mrna.LG1.277.1	m.5603	ENSDART00000060545.6	83.54	4e-122	440
on.mrna.LG1.278.1	m.3355	ENSDART00000098277.4	79.27	1e-45	184
on.mrna.LG1.278.2	m.3359	ENSDART00000098277.4	81.39	5e-32	139
on.mrna.LG1.278.3	m.3357	ENSDART00000098277.4	79.27	1e-45	184
on.mrna.LG1.279.1	m.3463	ENSDART00000108471.2	82.85	0	1558
on.mrna.LG1.279.2	m.3473	ENSDART00000108471.2	82.85	0	1558
on.mrna.LG1.279.3	m.3478	ENSDART00000108471.2	82.13	0	1560
on.mrna.LG1.279.4	m.3468	ENSDART00000108471.2	82.13	0	1560
on.mrna.LG1.28.2	m.5997	ENSDART00000078896.5	100	0.18	40.1
on.mrna.LG1.28.4	m.6001	ENSDART00000078896.5	100	0.19	40.1
on.mrna.LG1.280.1	m.3324	ENSDART00000100105.5	82.52	4e-27	123
on.mrna.LG1.280.2	m.3322	ENSDART00000100105.5	82.52	8e-27	123
on.mrna.LG1.281.1	m.2613	ENSDART00000082664.5	80.92	0	656
on.mrna.LG1.281.2	m.2610	ENSDART00000082664.5	80.92	0	656
on.mrna.LG1.281.3	m.2619	ENSDART00000082664.5	80.92	0	656
on.mrna.LG1.281.4	m.2622	ENSDART00000082664.5	80.92	0	656
on.mrna.LG1.281.5	m.2616	ENSDART00000082664.5	80.92	0	656
on.mrna.LG1.2810001.1	m.1190	ENSDART00000155954.1	100	0.002	44.1
on.mrna.LG1.283.1	m.3939	ENSDART00000003612.7	79.23	3e-110	400
on.mrna.LG1.2830001.1	m.4942	ENSDART00000056614.7	100	0.63	36.2
on.mrna.LG1.2830001.2	m.4941	ENSDART00000056614.7	100	0.69	36.2
on.mrna.LG1.2830001.3	m.4943	ENSDART00000160000.1	100	0.52	36.2
on.mrna.LG1.284.1	m.474	ENSDART00000114427.3	85	1e-27	127
on.mrna.LG1.285.1	m.1564	ENSDART00000021317.8	83.84	0	1848
on.mrna.LG1.285.2	m.1560	ENSDART00000021317.8	83.84	0	1848
on.mrna.LG1.285.3	m.1568	ENSDART00000021317.8	83.84	0	1848
on.mrna.LG1.286.1	m.2180	ENSDART00000027616.8	84.92	0	745
on.mrna.LG1.286.2	m.2175	ENSDART00000027616.8	84.92	0	745
on.mrna.LG1.287.1	m.2511	ENSDART00000082604.4	80.8	2e-40	168
on.mrna.LG1.288.1	m.1950	ENSDART00000154961.1	82.4	2e-153	543
on.mrna.LG1.288.2	m.1948	ENSDART00000154961.1	82.4	2e-153	543
on.mrna.LG1.288.3	m.1949	ENSDART00000154961.1	82.4	2e-153	543
on.mrna.LG1.288.4	m.1951	ENSDART00000154961.1	82.4	2e-153	543
on.mrna.LG1.288.5	m.1947	ENSDART00000154961.1	82.4	2e-153	543
on.mrna.LG1.2880001.1	m.339	ENSDART00000109147.3	100	0.1	38.2
on.mrna.LG1.289.1	m.3722	ENSDART00000082740.5	83.78	0	652
on.mrna.LG1.289.2	m.3731	ENSDART00000150143.2	83.88	0	823
on.mrna.LG1.289.3	m.3728	ENSDART00000150143.2	83.88	0	823
on.mrna.LG1.29.1	m.3656	ENSDART00000099333.5	84.27	6e-10	65.9
on.mrna.LG1.29.2	m.3659	ENSDART00000055843.3	95.12	7e-10	65.9
on.mrna.LG1.29.3	m.3658	ENSDART00000055843.3	95.12	6e-10	65.9
on.mrna.LG1.290.1	m.1971	ENSDART00000156301.2	79.04	2e-90	335
on.mrna.LG1.290.10	m.1973	ENSDART00000082679.5	83.1	9e-49	196
on.mrna.LG1.290.2	m.1974	ENSDART00000156301.2	79.04	2e-90	335
on.mrna.LG1.290.3	m.1964	ENSDART00000156301.2	79.04	2e-90	335
on.mrna.LG1.290.4	m.1967	ENSDART00000156301.2	79.04	2e-90	335
on.mrna.LG1.290.5	m.1969	ENSDART00000156301.2	79.04	2e-90	335
on.mrna.LG1.290.6	m.1962	ENSDART00000156301.2	79.04	2e-90	335
on.mrna.LG1.290.7	m.1978	ENSDART00000156301.2	79.04	2e-90	335
on.mrna.LG1.290.8	m.1981	ENSDART00000156301.2	79.04	2e-90	335
on.mrna.LG1.290.9	m.1977	ENSDART00000082679.5	83.1	1e-48	196
on.mrna.LG1.293.1	m.4368	ENSDART00000084282.6	100	0.69	36.2
on.mrna.LG1.293.2	m.4366	ENSDART00000111837.3	95.45	0.49	36.2
on.mrna.LG1.294.1	m.1917	ENSDART00000166109.1	81.05	0	1138
on.mrna.LG1.294.2	m.1926	ENSDART00000166109.1	82.02	0	1126
on.mrna.LG1.294.3	m.1938	ENSDART00000166109.1	82.02	0	1126
on.mrna.LG1.294.4	m.1922	ENSDART00000166109.1	82.02	0	1126
on.mrna.LG1.294.5	m.1934	ENSDART00000166109.1	82.11	0	844
on.mrna.LG1.294.6	m.1930	ENSDART00000166109.1	82.02	0	1126
on.mrna.LG1.295.1	m.3033	ENSDART00000160374.1	82.35	4e-05	50.1
on.mrna.LG1.296.1	m.4178	ENSDART00000169228.1	88	3e-13	77.8
on.mrna.LG1.296.2	m.4176	ENSDART00000169228.1	83.17	9e-10	65.9
on.mrna.LG1.297.1	m.3755	ENSDART00000162693.1	82.61	9e-20	97.6
on.mrna.LG1.298.1	m.386	ENSDART00000124969.2	86.54	0.001	48.1
on.mrna.LG1.298.1	m.387	ENSDART00000173234.1	84.96	1e-16	89.7
on.mrna.LG1.298.2	m.378	ENSDART00000124969.2	86.54	0.001	48.1
on.mrna.LG1.298.2	m.381	ENSDART00000173234.1	84.96	1e-16	89.7
on.mrna.LG1.299.1	m.5418	ENSDART00000167564.1	90.12	2e-19	97.6
on.mrna.LG1.300.1	m.425	ENSDART00000170575.1	88.24	5e-06	54
on.mrna.LG1.300.2	m.426	ENSDART00000170575.1	88.24	5e-06	54
on.mrna.LG1.301.1	m.4619	ENSDART00000166307.1	100	0.44	36.2
on.mrna.LG1.302.1	m.3753	ENSDART00000162553.1	81.68	0	833
on.mrna.LG1.302.2	m.3754	ENSDART00000162553.1	81.68	0	833
on.mrna.LG1.304.1	m.3670	ENSDART00000168460.1	85.44	1e-147	523
on.mrna.LG1.304.2	m.3669	ENSDART00000168460.1	85.44	1e-147	523
on.mrna.LG1.304.3	m.3671	ENSDART00000168460.1	85.44	9e-148	523
on.mrna.LG1.304.4	m.3672	ENSDART00000168460.1	85.44	9e-148	523
on.mrna.LG1.305.1	m.2537	ENSDART00000158618.1	85.16	8e-21	103
on.mrna.LG1.307.1	m.5784	ENSDART00000172015.1	84.54	2e-34	147
on.mrna.LG1.308.1	m.555	ENSDART00000162978.1	81.39	0	1378
on.mrna.LG1.308.2	m.549	ENSDART00000162978.1	81.39	0	1378
on.mrna.LG1.308.3	m.552	ENSDART00000162978.1	81.39	0	1378
on.mrna.LG1.31.1	m.1894	ENSDART00000001376.6	82.61	2e-19	97.6
on.mrna.LG1.31.2	m.1893	ENSDART00000001376.6	82.61	1e-19	97.6
on.mrna.LG1.310.1	m.2564	ENSDART00000167440.1	81.47	9e-170	601
on.mrna.LG1.313.1	m.5628	ENSDART00000161319.1	82.1	0	694
on.mrna.LG1.314.1	m.4824	ENSDART00000159205.1	88.76	1e-18	97.6
on.mrna.LG1.315.1	m.4650	ENSDART00000170714.1	82.69	0	1505
on.mrna.LG1.315.2	m.4645	ENSDART00000170714.1	82.99	0	1556
on.mrna.LG1.315.3	m.4655	ENSDART00000170714.1	82.99	0	1556
on.mrna.LG1.316.1	m.930	ENSDART00000122902.2	100	0.083	40.1
on.mrna.LG1.316.10	m.937	ENSDART00000122902.2	100	0.079	40.1
on.mrna.LG1.316.2	m.944	ENSDART00000149903.2	100	0.071	40.1
on.mrna.LG1.316.3	m.952	ENSDART00000122902.2	100	0.082	40.1
on.mrna.LG1.316.4	m.947	ENSDART00000122902.2	100	0.03	40.1
on.mrna.LG1.316.5	m.941	ENSDART00000149903.2	100	0.071	40.1
on.mrna.LG1.316.6	m.934	ENSDART00000149903.2	100	0.071	40.1
on.mrna.LG1.316.7	m.956	ENSDART00000122902.2	100	0.084	40.1
on.mrna.LG1.316.8	m.949	ENSDART00000122902.2	100	0.079	40.1
on.mrna.LG1.316.9	m.940	ENSDART00000122902.2	100	0.027	40.1
on.mrna.LG1.3160001.1	m.3510	ENSDART00000149903.2	100	0.025	40.1
on.mrna.LG1.317.1	m.158	ENSDART00000127351.2	82.87	3e-30	135
on.mrna.LG1.318.1	m.2986	ENSDART00000085716.6	80.38	1e-23	113
on.mrna.LG1.319.1	m.2467	ENSDART00000052539.6	81.62	0	1344
on.mrna.LG1.319.2	m.2476	ENSDART00000052539.6	81.62	0	1344
on.mrna.LG1.319.3	m.2473	ENSDART00000052539.6	81.62	0	1344
on.mrna.LG1.319.4	m.2464	ENSDART00000052539.6	81.62	0	1344
on.mrna.LG1.319.5	m.2470	ENSDART00000052539.6	81.62	0	1344
on.mrna.LG1.32.1	m.3499	ENSDART00000170935.2	80.6	2e-131	470
on.mrna.LG1.32.2	m.3500	ENSDART00000170935.2	80.6	2e-131	470
on.mrna.LG1.32.3	m.3498	ENSDART00000170935.2	80.6	2e-131	470
on.mrna.LG1.321.1	m.5742	ENSDART00000166046.1	82.01	2e-99	365
on.mrna.LG1.321.10	m.5763	ENSDART00000111626.3	82.8	3e-117	424
on.mrna.LG1.321.11	m.5775	ENSDART00000166046.1	81.16	2e-68	262
on.mrna.LG1.321.12	m.5757	ENSDART00000166046.1	82.79	2e-133	478
on.mrna.LG1.321.13	m.5769	ENSDART00000111626.3	82.8	3e-117	424
on.mrna.LG1.321.14	m.5745	ENSDART00000166046.1	81.16	2e-68	262
on.mrna.LG1.321.2	m.5766	ENSDART00000111626.3	81.9	3e-83	311
on.mrna.LG1.321.3	m.5751	ENSDART00000166046.1	82.01	2e-99	365
on.mrna.LG1.321.4	m.5772	ENSDART00000166046.1	80.26	4e-48	194
on.mrna.LG1.321.5	m.5760	ENSDART00000166046.1	81.16	2e-68	262
on.mrna.LG1.321.6	m.5754	ENSDART00000166046.1	80.26	4e-48	194
on.mrna.LG1.321.7	m.5778	ENSDART00000166046.1	81.16	2e-68	262
on.mrna.LG1.321.8	m.5781	ENSDART00000166046.1	82.79	2e-133	478
on.mrna.LG1.321.9	m.5748	ENSDART00000111626.3	80.22	7e-47	190
on.mrna.LG1.322.1	m.5176	ENSDART00000142818.3	80.85	8e-56	220
on.mrna.LG1.322.2	m.5179	ENSDART00000142818.3	80.73	3e-27	125
on.mrna.LG1.322.3	m.5182	ENSDART00000142818.3	80.85	8e-56	220
on.mrna.LG1.322.4	m.5173	ENSDART00000142818.3	80.85	8e-56	220
on.mrna.LG1.323.1	m.3802	ENSDART00000027466.9	81.86	0	636
on.mrna.LG1.323.2	m.3794	ENSDART00000027466.9	81.9	1e-152	541
on.mrna.LG1.323.3	m.3791	ENSDART00000027466.9	81.86	0	636
on.mrna.LG1.323.4	m.3798	ENSDART00000027466.9	81.9	1e-152	541
on.mrna.LG1.324.1	m.3189	ENSDART00000099639.7	81.13	4e-60	234
on.mrna.LG1.324.2	m.3186	ENSDART00000099639.7	81.13	4e-60	234
on.mrna.LG1.325.1	m.624	ENSDART00000075508.4	96	0.013	42.1
on.mrna.LG1.325.3	m.629	ENSDART00000075508.4	96	0.017	42.1
on.mrna.LG1.327.1	m.4523	ENSDART00000075513.6	81	0.0002	48.1
on.mrna.LG1.327.2	m.4533	ENSDART00000075513.6	81	0.0002	48.1
on.mrna.LG1.327.3	m.4538	ENSDART00000075513.6	81	0.0002	48.1
on.mrna.LG1.327.4	m.4528	ENSDART00000075513.6	81	0.0002	48.1
on.mrna.LG1.328.1	m.1761	ENSDART00000075519.5	79.96	7e-169	595
on.mrna.LG1.328.2	m.1762	ENSDART00000075519.5	80.26	1e-163	577
on.mrna.LG1.329.1	m.972	ENSDART00000173057.1	95.83	0.038	40.1
on.mrna.LG1.329.2	m.974	ENSDART00000108782.4	100	0.003	44.1
on.mrna.LG1.329.3	m.973	ENSDART00000108782.4	79.7	6e-05	50.1
on.mrna.LG1.329.4	m.971	ENSDART00000108782.4	100	0.003	44.1
on.mrna.LG1.3290001.1	m.3045	ENSDART00000110265.4	85.71	3e-36	155
on.mrna.LG1.33.1	m.4296	ENSDART00000047208.7	78.85	5e-54	214
on.mrna.LG1.33.10	m.4330	ENSDART00000173673.1	82	2e-144	515
on.mrna.LG1.33.11	m.4303	ENSDART00000173673.1	83	2e-180	634
on.mrna.LG1.33.12	m.4309	ENSDART00000173673.1	83.13	0	688
on.mrna.LG1.33.13	m.4298	ENSDART00000047208.7	80.89	6e-110	400
on.mrna.LG1.33.14	m.4321	ENSDART00000173673.1	83	2e-180	634
on.mrna.LG1.33.15	m.4306	ENSDART00000173673.1	83	2e-180	634
on.mrna.LG1.33.16	m.4340	ENSDART00000173673.1	81.77	1e-128	462
on.mrna.LG1.33.17	m.4286	ENSDART00000047208.7	83.27	0	706
on.mrna.LG1.33.18	m.4293	ENSDART00000047208.7	80.89	5e-110	400
on.mrna.LG1.33.19	m.4327	ENSDART00000173673.1	82	1e-144	515
on.mrna.LG1.33.2	m.4301	ENSDART00000047208.7	78.85	5e-54	214
on.mrna.LG1.33.20	m.4318	ENSDART00000047208.7	83.27	0	706
on.mrna.LG1.33.21	m.4312	ENSDART00000047208.7	80.89	5e-110	400
on.mrna.LG1.33.22	m.4343	ENSDART00000173673.1	82	1e-144	515
on.mrna.LG1.33.3	m.4280	ENSDART00000047208.7	78.27	2e-93	345
on.mrna.LG1.33.4	m.4337	ENSDART00000047208.7	78.85	6e-54	214
on.mrna.LG1.33.5	m.4333	ENSDART00000047208.7	78.85	6e-54	214
on.mrna.LG1.33.6	m.4289	ENSDART00000047208.7	78.85	6e-54	214
on.mrna.LG1.33.7	m.4324	ENSDART00000047208.7	83.27	0	706
on.mrna.LG1.33.8	m.4283	ENSDART00000047208.7	83.27	0	706
on.mrna.LG1.33.9	m.4315	ENSDART00000047208.7	80.89	7e-110	400
on.mrna.LG1.330.1	m.601	ENSDART00000129769.3	86.79	4e-49	198
on.mrna.LG1.330.2	m.599	ENSDART00000129769.3	86.79	4e-49	198
on.mrna.LG1.330.3	m.597	ENSDART00000129769.3	86.79	4e-49	198
on.mrna.LG1.331.1	m.5257	ENSDART00000131282.2	83.21	1e-94	349
on.mrna.LG1.331.10	m.5276	ENSDART00000009938.10	83.01	2e-58	228
on.mrna.LG1.331.2	m.5267	ENSDART00000131282.2	83.21	9e-95	349
on.mrna.LG1.331.3	m.5284	ENSDART00000131282.2	83.21	9e-95	349
on.mrna.LG1.331.4	m.5262	ENSDART00000131282.2	83.21	9e-95	349
on.mrna.LG1.331.5	m.5289	ENSDART00000131282.2	83.21	1e-94	349
on.mrna.LG1.331.6	m.5294	ENSDART00000131282.2	83.21	9e-95	349
on.mrna.LG1.331.7	m.5299	ENSDART00000009938.10	82.94	1e-96	355
on.mrna.LG1.331.8	m.5272	ENSDART00000009938.10	82.94	1e-96	355
on.mrna.LG1.331.9	m.5280	ENSDART00000009938.10	82.94	1e-96	355
on.mrna.LG1.332.1	m.1609	ENSDART00000110906.4	80.43	3e-49	198
on.mrna.LG1.332.2	m.1606	ENSDART00000110906.4	80.43	2e-49	198
on.mrna.LG1.332.3	m.1605	ENSDART00000110906.4	80.43	3e-49	198
on.mrna.LG1.332.4	m.1604	ENSDART00000110906.4	85.43	1e-27	125
on.mrna.LG1.332.5	m.1611	ENSDART00000110906.4	80.43	2e-49	198
on.mrna.LG1.332.6	m.1612	ENSDART00000110906.4	80.43	2e-49	198
on.mrna.LG1.332.7	m.1607	ENSDART00000110906.4	80.43	2e-49	198
on.mrna.LG1.332.8	m.1608	ENSDART00000110906.4	80.43	2e-49	198
on.mrna.LG1.332.9	m.1610	ENSDART00000110906.4	80.43	2e-49	198
on.mrna.LG1.333.1	m.3937	ENSDART00000127006.2	86.96	1e-09	65.9
on.mrna.LG1.334.1	m.3251	ENSDART00000086492.5	100	0.84	36.2
on.mrna.LG1.334.2	m.3252	ENSDART00000086492.5	100	1	36.2
on.mrna.LG1.334.3	m.3250	ENSDART00000086492.5	100	0.84	36.2
on.mrna.LG1.335.1	m.2407	ENSDART00000111303.4	79.86	6e-39	165
on.mrna.LG1.335.2	m.2404	ENSDART00000166834.1	84.62	2e-10	69.9
on.mrna.LG1.335.3	m.2401	ENSDART00000166834.1	84.62	2e-10	69.9
on.mrna.LG1.335.4	m.2398	ENSDART00000166834.1	84.62	2e-10	69.9
on.mrna.LG1.336.1	m.4102	ENSDART00000159464.1	80.6	4e-110	400
on.mrna.LG1.336.2	m.4101	ENSDART00000159464.1	80.6	4e-110	400
on.mrna.LG1.3360001.1	m.3595	ENSDART00000059193.4	80.54	3e-09	65.9
on.mrna.LG1.3360001.1	m.3596	ENSDART00000059193.4	86.15	5e-07	58
on.mrna.LG1.337.1	m.118	ENSDART00000162748.1	84.78	7e-22	107
on.mrna.LG1.337.2	m.108	ENSDART00000162748.1	84.78	6e-22	107
on.mrna.LG1.337.3	m.113	ENSDART00000162748.1	84.78	7e-22	107
on.mrna.LG1.337.4	m.128	ENSDART00000162748.1	84.78	7e-22	107
on.mrna.LG1.337.5	m.98	ENSDART00000162748.1	84.78	7e-22	107
on.mrna.LG1.337.6	m.123	ENSDART00000162748.1	84.78	6e-22	107
on.mrna.LG1.337.7	m.133	ENSDART00000162748.1	84.78	7e-22	107
on.mrna.LG1.337.8	m.103	ENSDART00000162748.1	84.78	6e-22	107
on.mrna.LG1.338.1	m.617	ENSDART00000158363.1	85	1e-13	79.8
on.mrna.LG1.338.2	m.621	ENSDART00000158363.1	85	1e-13	79.8
on.mrna.LG1.339.1	m.52	ENSDART00000165301.1	85.45	5e-71	268
on.mrna.LG1.339.2	m.49	ENSDART00000165301.1	84.05	1e-75	283
on.mrna.LG1.339.3	m.48	ENSDART00000165301.1	84.05	1e-75	283
on.mrna.LG1.339.4	m.50	ENSDART00000159775.1	83.87	4e-23	109
on.mrna.LG1.339.5	m.51	ENSDART00000159775.1	84.21	2e-40	167
on.mrna.LG1.34.1	m.4714	ENSDART00000052471.4	86.57	1e-08	61.9
on.mrna.LG1.34.2	m.4712	ENSDART00000173798.1	77.96	2e-33	145
on.mrna.LG1.34.3	m.4715	ENSDART00000173798.1	77.53	8e-20	99.6
on.mrna.LG1.34.4	m.4719	ENSDART00000052471.4	80.34	9e-13	75.8
on.mrna.LG1.34.5	m.4710	ENSDART00000173798.1	77.96	2e-33	145
on.mrna.LG1.34.6	m.4709	ENSDART00000052471.4	80.34	9e-13	75.8
on.mrna.LG1.34.7	m.4720	ENSDART00000052471.4	80.34	9e-13	75.8
on.mrna.LG1.34.8	m.4717	ENSDART00000173798.1	77.96	2e-33	145
on.mrna.LG1.34.9	m.4708	ENSDART00000052471.4	80.34	9e-13	75.8
on.mrna.LG1.341.1	m.5917	ENSDART00000136657.3	87.5	4e-09	63.9
on.mrna.LG1.341.10	m.5922	ENSDART00000136657.3	87.5	6e-09	63.9
on.mrna.LG1.341.11	m.5914	ENSDART00000136657.3	87.5	6e-09	63.9
on.mrna.LG1.341.12	m.5924	ENSDART00000136657.3	87.5	5e-09	63.9
on.mrna.LG1.341.13	m.5910	ENSDART00000136657.3	87.5	6e-09	63.9
on.mrna.LG1.341.14	m.5925	ENSDART00000136657.3	87.5	6e-09	63.9
on.mrna.LG1.341.15	m.5929	ENSDART00000136657.3	87.5	5e-09	63.9
on.mrna.LG1.341.16	m.5919	ENSDART00000136657.3	87.5	6e-09	63.9
on.mrna.LG1.341.17	m.5921	ENSDART00000136657.3	93.33	0.002	44.1
on.mrna.LG1.341.2	m.5918	ENSDART00000136657.3	87.5	4e-09	63.9
on.mrna.LG1.341.3	m.5928	ENSDART00000136657.3	87.5	6e-09	63.9
on.mrna.LG1.341.4	m.5909	ENSDART00000136657.3	87.5	5e-09	63.9
on.mrna.LG1.341.5	m.5912	ENSDART00000136657.3	87.5	6e-09	63.9
on.mrna.LG1.341.6	m.5927	ENSDART00000136657.3	87.5	5e-09	63.9
on.mrna.LG1.341.7	m.5915	ENSDART00000136657.3	87.5	6e-09	63.9
on.mrna.LG1.341.8	m.5930	ENSDART00000136657.3	87.5	6e-09	63.9
on.mrna.LG1.341.9	m.5916	ENSDART00000136657.3	87.5	6e-09	63.9
on.mrna.LG1.342.1	m.5070	ENSDART00000089549.6	93.33	0.003	44.1
on.mrna.LG1.342.2	m.5073	ENSDART00000089549.6	87.01	4e-12	73.8
on.mrna.LG1.342.3	m.5078	ENSDART00000089549.6	87.01	8e-12	73.8
on.mrna.LG1.342.4	m.5071	ENSDART00000089549.6	87.01	8e-12	73.8
on.mrna.LG1.342.5	m.5075	ENSDART00000089549.6	87.01	8e-12	73.8
on.mrna.LG1.342.6	m.5077	ENSDART00000089549.6	87.01	8e-12	73.8
on.mrna.LG1.342.7	m.5072	ENSDART00000089549.6	87.01	6e-12	73.8
on.mrna.LG1.343.1	m.4022	ENSDART00000079139.3	82.68	6e-158	559
on.mrna.LG1.343.2	m.4018	ENSDART00000079139.3	82.68	5e-158	559
on.mrna.LG1.344.1	m.2543	ENSDART00000023721.7	84.27	7e-116	420
on.mrna.LG1.345.1	m.2039	ENSDART00000052345.5	81.4	0.003	44.1
on.mrna.LG1.346.1	m.1033	ENSDART00000130125.2	84.56	3e-139	496
on.mrna.LG1.347.1	m.5857	ENSDART00000076425.4	81.15	7e-28	127
on.mrna.LG1.347.2	m.5860	ENSDART00000076425.4	81.15	7e-28	127
on.mrna.LG1.347.3	m.5855	ENSDART00000076425.4	92.77	6e-25	117
on.mrna.LG1.348.1	m.430	ENSDART00000033118.5	100	1.8	34.2
on.mrna.LG1.348.2	m.427	ENSDART00000046663.7	100	0.76	36.2
on.mrna.LG1.348.3	m.433	ENSDART00000046663.7	100	0.93	36.2
on.mrna.LG1.348.4	m.428	ENSDART00000149903.2	100	0.057	40.1
on.mrna.LG1.348.5	m.431	ENSDART00000149903.2	100	0.077	40.1
on.mrna.LG1.349.1	m.1585	ENSDART00000020923.8	100	0.25	38.2
on.mrna.LG1.349.2	m.1582	ENSDART00000020923.8	100	0.25	38.2
on.mrna.LG1.349.3	m.1588	ENSDART00000020923.8	100	0.25	38.2
on.mrna.LG1.35.1	m.5853	ENSDART00000123498.3	82.42	5e-84	311
on.mrna.LG1.350.1	m.4519	ENSDART00000052342.4	81.71	3e-31	137
on.mrna.LG1.350001.1	m.2639	ENSDART00000123498.3	82.42	6e-84	311
on.mrna.LG1.352.1	m.201	ENSDART00000052805.3	81.56	9e-12	73.8
on.mrna.LG1.353.1	m.2313	ENSDART00000052802.4	82.91	6e-20	99.6
on.mrna.LG1.353.2	m.2318	ENSDART00000052802.4	82.91	5e-20	99.6
on.mrna.LG1.354.1	m.3991	ENSDART00000060166.4	79.63	1e-120	434
on.mrna.LG1.354.2	m.3989	ENSDART00000060166.4	79.63	1e-120	434
on.mrna.LG1.354.3	m.3990	ENSDART00000060166.4	81.16	2e-116	420
on.mrna.LG1.355.1	m.3079	ENSDART00000026571.6	77.82	4e-19	97.6
on.mrna.LG1.355.2	m.3076	ENSDART00000026571.6	77.82	4e-19	97.6
on.mrna.LG1.355.3	m.3082	ENSDART00000026571.6	78.81	1e-14	81.8
on.mrna.LG1.356.1	m.3701	ENSDART00000073846.4	80.94	2e-29	131
on.mrna.LG1.356.2	m.3702	ENSDART00000073846.4	83.02	2e-30	135
on.mrna.LG1.357.1	m.312	ENSDART00000080904.6	100	0.045	40.1
on.mrna.LG1.357.2	m.316	ENSDART00000080904.6	100	0.051	40.1
on.mrna.LG1.357.3	m.315	ENSDART00000080904.6	100	0.051	40.1
on.mrna.LG1.357.4	m.319	ENSDART00000080904.6	100	0.045	40.1
on.mrna.LG1.357.5	m.321	ENSDART00000080904.6	100	0.045	40.1
on.mrna.LG1.357.6	m.317	ENSDART00000080904.6	100	0.047	40.1
on.mrna.LG1.357.7	m.313	ENSDART00000080904.6	100	0.047	40.1
on.mrna.LG1.358.1	m.4900	ENSDART00000086001.5	100	0.29	38.2
on.mrna.LG1.358.2	m.4915	ENSDART00000086001.5	100	0.29	38.2
on.mrna.LG1.358.3	m.4930	ENSDART00000086001.5	100	0.29	38.2
on.mrna.LG1.358.4	m.4905	ENSDART00000086001.5	100	0.31	38.2
on.mrna.LG1.358.5	m.4910	ENSDART00000086001.5	100	0.28	38.2
on.mrna.LG1.358.6	m.4925	ENSDART00000086001.5	100	0.31	38.2
on.mrna.LG1.358.7	m.4920	ENSDART00000086001.5	100	0.3	38.2
on.mrna.LG1.359.1	m.2373	ENSDART00000082664.5	100	3.4	34.2
on.mrna.LG1.36.1	m.2845	ENSDART00000173596.1	88.24	4e-06	54
on.mrna.LG1.36.2	m.2846	ENSDART00000173596.1	88.24	4e-06	54
on.mrna.LG1.36.3	m.2847	ENSDART00000173596.1	88.24	4e-06	54
on.mrna.LG1.360.1	m.5239	ENSDART00000091470.6	80.51	3e-93	345
on.mrna.LG1.361.1	m.2046	ENSDART00000023653.8	86.25	9e-12	71.9
on.mrna.LG1.362.1	m.3816	ENSDART00000053521.6	80.8	3e-37	157
on.mrna.LG1.362.2	m.3822	ENSDART00000053521.6	80.8	4e-37	157
on.mrna.LG1.362.3	m.3818	ENSDART00000053521.6	80.8	5e-37	157
on.mrna.LG1.362.4	m.3820	ENSDART00000053521.6	80.8	5e-37	157
on.mrna.LG1.362.5	m.3824	ENSDART00000053521.6	80.8	5e-37	157
on.mrna.LG1.363.1	m.2461	ENSDART00000041577.7	80.62	1e-45	186
on.mrna.LG1.363.2	m.2452	ENSDART00000041577.7	80.62	2e-45	186
on.mrna.LG1.363.3	m.2458	ENSDART00000041577.7	80.62	2e-45	186
on.mrna.LG1.363.4	m.2455	ENSDART00000041577.7	80.62	2e-45	186
on.mrna.LG1.364.1	m.1816	ENSDART00000166511.1	96.15	0.005	44.1
on.mrna.LG1.365.1	m.2350	ENSDART00000131167.2	100	0.2	38.2
on.mrna.LG1.365.1	m.2351	ENSDART00000131167.2	100	0.2	38.2
on.mrna.LG1.366.1	m.2981	ENSDART00000110004.3	95.45	0.53	36.2
on.mrna.LG1.367.1	m.2148	ENSDART00000105496.4	100	1.4	34.2
on.mrna.LG1.368.1	m.2721	ENSDART00000039495.4	80.18	6e-18	91.7
on.mrna.LG1.369.1	m.3313	ENSDART00000159316.1	85.9	3e-10	67.9
on.mrna.LG1.3690001.1	m.2642	ENSDART00000023539.7	81.19	8e-40	165
on.mrna.LG1.37.1	m.3709	ENSDART00000111301.4	83.83	3e-25	117
on.mrna.LG1.37.2	m.3708	ENSDART00000111301.4	83.83	2e-25	117
on.mrna.LG1.37.3	m.3710	ENSDART00000111301.4	83.83	2e-25	117
on.mrna.LG1.370.1	m.1548	ENSDART00000138403.3	81.97	5e-10	67.9
on.mrna.LG1.370.2	m.1549	ENSDART00000138403.3	81.97	5e-10	67.9
on.mrna.LG1.3700001.1	m.377	ENSDART00000003210.7	84	3e-17	89.7
on.mrna.LG1.371.1	m.1798	ENSDART00000170285.1	79.17	4e-62	240
on.mrna.LG1.371.10	m.1795	ENSDART00000170285.1	80.28	1e-17	91.7
on.mrna.LG1.371.11	m.1800	ENSDART00000170285.1	80.28	1e-17	91.7
on.mrna.LG1.371.2	m.1796	ENSDART00000170285.1	79.17	3e-62	240
on.mrna.LG1.371.3	m.1797	ENSDART00000170285.1	79.17	4e-62	240
on.mrna.LG1.371.4	m.1799	ENSDART00000170285.1	79.17	3e-62	240
on.mrna.LG1.371.5	m.1792	ENSDART00000170285.1	79.17	3e-62	240
on.mrna.LG1.371.6	m.1793	ENSDART00000170285.1	80.28	1e-17	91.7
on.mrna.LG1.371.7	m.1794	ENSDART00000170285.1	80.28	1e-17	91.7
on.mrna.LG1.371.8	m.1791	ENSDART00000170285.1	79.17	3e-62	240
on.mrna.LG1.371.9	m.1801	ENSDART00000170285.1	80.28	1e-17	91.7
on.mrna.LG1.372.1	m.2591	ENSDART00000152240.1	90.2	4e-08	61.9
on.mrna.LG1.372.2	m.2594	ENSDART00000152240.1	90.2	3e-08	61.9
on.mrna.LG1.374.1	m.3562	ENSDART00000099326.3	81.97	4e-10	67.9
on.mrna.LG1.374.2	m.3565	ENSDART00000099326.3	81.97	4e-10	67.9
on.mrna.LG1.374.3	m.3569	ENSDART00000099326.3	81.97	3e-10	67.9
on.mrna.LG1.374.4	m.3572	ENSDART00000099326.3	81.97	3e-10	67.9
on.mrna.LG1.374.5	m.3559	ENSDART00000099326.3	81.97	2e-10	67.9
on.mrna.LG1.375.1	m.3934	ENSDART00000012374.8	80.8	9e-69	262
on.mrna.LG1.376.1	m.3447	ENSDART00000078894.4	81.32	4e-31	137
on.mrna.LG1.376.2	m.3448	ENSDART00000078894.4	81.32	4e-31	137
on.mrna.LG1.377.1	m.5525	ENSDART00000078888.4	79.85	1e-37	159
on.mrna.LG1.377.2	m.5526	ENSDART00000078888.4	79.85	1e-37	159
on.mrna.LG1.378.1	m.4806	ENSDART00000028033.5	91.18	0.002	44.1
on.mrna.LG1.379.1	m.1256	ENSDART00000033746.6	81.88	8e-15	81.8
on.mrna.LG1.38.1	m.265	ENSDART00000041820.5	80.77	1e-07	60
on.mrna.LG1.380.1	m.3547	ENSDART00000165450.1	82.55	5e-39	165
on.mrna.LG1.380.2	m.3542	ENSDART00000165450.1	82.55	5e-39	165
on.mrna.LG1.380.3	m.3532	ENSDART00000165450.1	82.55	5e-39	165
on.mrna.LG1.380.4	m.3552	ENSDART00000165450.1	82.67	3e-40	168
on.mrna.LG1.380.5	m.3537	ENSDART00000165450.1	82.67	3e-40	168
on.mrna.LG1.380.6	m.3527	ENSDART00000140908.2	81.82	8e-13	77.8
on.mrna.LG1.3800002.1	m.4126	ENSDART00000012758.6	96.3	0.0008	46.1
on.mrna.LG1.3800003.1	m.5847	ENSDART00000019248.7	100	0.29	36.2
on.mrna.LG1.381.1	m.5870	ENSDART00000121853.2	100	0.83	36.2
on.mrna.LG1.382.1	m.4568	ENSDART00000099285.3	80	3e-27	125
on.mrna.LG1.382.2	m.4567	ENSDART00000099285.3	81.05	9e-12	73.8
on.mrna.LG1.3820001.1	m.304	ENSDART00000064080.5	93.75	0.0002	48.1
on.mrna.LG1.383.1	m.4556	ENSDART00000005847.8	100	0.34	38.2
on.mrna.LG1.383.2	m.4552	ENSDART00000005847.8	100	0.34	38.2
on.mrna.LG1.383.3	m.4558	ENSDART00000005847.8	100	0.27	38.2
on.mrna.LG1.383.4	m.4554	ENSDART00000005847.8	100	0.22	38.2
on.mrna.LG1.383.5	m.4550	ENSDART00000005847.8	100	0.22	38.2
on.mrna.LG1.386.1	m.2043	ENSDART00000111861.3	88.52	6e-156	551
on.mrna.LG1.389.1	m.4978	ENSDART00000089035.5	83.97	1e-17	93.7
on.mrna.LG1.389.10	m.4962	ENSDART00000089035.5	83.97	9e-18	93.7
on.mrna.LG1.389.11	m.4970	ENSDART00000089035.5	83.97	8e-18	93.7
on.mrna.LG1.389.2	m.4976	ENSDART00000089035.5	83.97	1e-17	93.7
on.mrna.LG1.389.3	m.4966	ENSDART00000089035.5	83.97	9e-18	93.7
on.mrna.LG1.389.4	m.4968	ENSDART00000089035.5	83.97	9e-18	93.7
on.mrna.LG1.389.5	m.4974	ENSDART00000089035.5	83.97	7e-18	93.7
on.mrna.LG1.389.6	m.4980	ENSDART00000089035.5	83.97	9e-18	93.7
on.mrna.LG1.389.7	m.4960	ENSDART00000089035.5	83.97	9e-18	93.7
on.mrna.LG1.389.8	m.4964	ENSDART00000089035.5	83.97	1e-17	93.7
on.mrna.LG1.389.9	m.4972	ENSDART00000089035.5	83.97	1e-17	93.7
on.mrna.LG1.39.1	m.2227	ENSDART00000083514.6	81.64	3e-38	161
on.mrna.LG1.39.2	m.2214	ENSDART00000083514.6	81.64	5e-38	161
on.mrna.LG1.39.3	m.2207	ENSDART00000083514.6	81.64	5e-38	161
on.mrna.LG1.39.4	m.2221	ENSDART00000083514.6	81.64	4e-38	161
on.mrna.LG1.390.1	m.41	ENSDART00000016983.9	81.67	4e-163	577
on.mrna.LG1.390.1	m.42	ENSDART00000016983.9	95.65	0.46	38.2
on.mrna.LG1.391.1	m.840	ENSDART00000090397.5	88.89	0.22	40.1
on.mrna.LG1.391.2	m.831	ENSDART00000090397.5	88.89	0.23	40.1
on.mrna.LG1.391.3	m.845	ENSDART00000090397.5	88.89	0.23	40.1
on.mrna.LG1.392.1	m.151	ENSDART00000142336.1	81.79	9e-149	529
on.mrna.LG1.392.2	m.144	ENSDART00000142336.1	81.79	9e-149	529
on.mrna.LG1.393.1	m.5659	ENSDART00000025423.8	82.91	0	1146
on.mrna.LG1.393.2	m.5663	ENSDART00000025423.8	82.8	0	1154
on.mrna.LG1.393.3	m.5664	ENSDART00000025423.8	81.6	0	850
on.mrna.LG1.393.4	m.5657	ENSDART00000025423.8	82.01	0	835
on.mrna.LG1.393.5	m.5665	ENSDART00000025423.8	81.6	0	850
on.mrna.LG1.393.6	m.5661	ENSDART00000025423.8	81.7	0	842
on.mrna.LG1.393.7	m.5658	ENSDART00000025423.8	84.92	0	1059
on.mrna.LG1.393.8	m.5660	ENSDART00000025423.8	83.62	0	755
on.mrna.LG1.393.9	m.5662	ENSDART00000025423.8	82.8	0	1154
on.mrna.LG1.394.1	m.5602	ENSDART00000077341.4	95.74	4e-13	77.8
on.mrna.LG1.395.1	m.2694	ENSDART00000109948.3	93.06	2e-20	103
on.mrna.LG1.396.1	m.2066	ENSDART00000010256.5	83.05	0	686
on.mrna.LG1.397.1	m.1534	ENSDART00000146543.1	84.93	6e-27	123
on.mrna.LG1.397.2	m.1528	ENSDART00000146543.1	84.93	6e-27	123
on.mrna.LG1.398.1	m.639	ENSDART00000102363.4	81.03	2e-118	426
on.mrna.LG1.398.2	m.641	ENSDART00000102363.4	80.91	1e-98	361
on.mrna.LG1.4.1	m.5616	ENSDART00000052389.4	79.29	5e-70	268
on.mrna.LG1.40.1	m.3985	ENSDART00000157917.1	78.2	7e-57	224
on.mrna.LG1.400.1	m.975	ENSDART00000002498.8	78.83	5e-18	93.7
on.mrna.LG1.4000001.1	m.1040	ENSDART00000114062.3	79.15	4e-32	139
on.mrna.LG1.402.1	m.4625	ENSDART00000051546.5	88.37	4e-17	91.7
on.mrna.LG1.403.1	m.2562	ENSDART00000021949.10	100	0.62	36.2
on.mrna.LG1.403.2	m.2563	ENSDART00000021949.10	100	0.62	36.2
on.mrna.LG1.404.1	m.4115	ENSDART00000126475.2	82.14	4e-18	95.6
on.mrna.LG1.405.1	m.905	ENSDART00000092373.5	95.65	0.84	38.2
on.mrna.LG1.405.2	m.912	ENSDART00000092373.5	95.65	0.86	38.2
on.mrna.LG1.406.1	m.273	ENSDART00000014945.7	100	3.1	34.2
on.mrna.LG1.406.1	m.274	ENSDART00000014945.7	100	3	34.2
on.mrna.LG1.408.1	m.1175	ENSDART00000111774.2	78.23	2e-48	196
on.mrna.LG1.408.2	m.1173	ENSDART00000111774.2	78.23	2e-48	196
on.mrna.LG1.4080001.1	m.2811	ENSDART00000137572.2	80.61	9e-26	117
on.mrna.LG1.4080001.2	m.2812	ENSDART00000137572.2	81.79	7e-36	151
on.mrna.LG1.409.1	m.3172	ENSDART00000078140.4	80.11	8e-106	385
on.mrna.LG1.409.2	m.3173	ENSDART00000078140.4	80.11	8e-106	385
on.mrna.LG1.41.1	m.4837	ENSDART00000038273.5	91.53	4e-13	77.8
on.mrna.LG1.41.2	m.4839	ENSDART00000038273.5	91.53	4e-13	77.8
on.mrna.LG1.41.3	m.4835	ENSDART00000038273.5	91.53	4e-13	77.8
on.mrna.LG1.410.1	m.2232	ENSDART00000089242.4	83.03	2e-21	105
on.mrna.LG1.411.1	m.964	ENSDART00000109753.4	100	0.087	38.2
on.mrna.LG1.412.1	m.54	ENSDART00000057638.3	91.67	1e-08	63.9
on.mrna.LG1.413.1	m.5834	ENSDART00000057638.3	79.75	4e-119	430
on.mrna.LG1.413.2	m.5838	ENSDART00000057638.3	79.75	4e-119	430
on.mrna.LG1.414.1	m.5017	ENSDART00000142129.2	84.87	3e-18	93.7
on.mrna.LG1.415.1	m.4263	ENSDART00000057641.5	83.12	5e-05	50.1
on.mrna.LG1.417.1	m.365	ENSDART00000109798.3	80.93	6e-17	91.7
on.mrna.LG1.417.2	m.372	ENSDART00000109798.3	80.93	7e-17	91.7
on.mrna.LG1.417.3	m.368	ENSDART00000109798.3	80.93	7e-17	91.7
on.mrna.LG1.418.1	m.2631	ENSDART00000142738.1	83.01	1e-14	81.8
on.mrna.LG1.418.2	m.2635	ENSDART00000142738.1	83.01	1e-14	81.8
on.mrna.LG1.418.3	m.2637	ENSDART00000056512.5	92.11	1e-05	52
on.mrna.LG1.418.4	m.2633	ENSDART00000056512.5	92.11	9e-06	52
on.mrna.LG1.419.1	m.2007	ENSDART00000057651.5	84.13	2e-94	347
on.mrna.LG1.419.10	m.2014	ENSDART00000057651.5	94.35	4e-72	272
on.mrna.LG1.419.11	m.2006	ENSDART00000057651.5	82.08	3e-08	60
on.mrna.LG1.419.12	m.2018	ENSDART00000057651.5	82.4	2e-12	73.8
on.mrna.LG1.419.13	m.2009	ENSDART00000057651.5	88.24	0.37	36.2
on.mrna.LG1.419.2	m.2012	ENSDART00000057651.5	84.13	2e-94	347
on.mrna.LG1.419.3	m.2015	ENSDART00000057651.5	84.13	2e-94	347
on.mrna.LG1.419.4	m.2019	ENSDART00000057651.5	84.13	2e-94	347
on.mrna.LG1.419.5	m.2005	ENSDART00000057651.5	84.13	2e-94	347
on.mrna.LG1.419.6	m.2013	ENSDART00000057651.5	94.35	4e-72	272
on.mrna.LG1.419.7	m.2017	ENSDART00000057651.5	94.35	4e-72	272
on.mrna.LG1.419.8	m.2010	ENSDART00000057651.5	94.35	7e-72	272
on.mrna.LG1.419.9	m.2003	ENSDART00000057651.5	94.35	6e-72	272
on.mrna.LG1.42.1	m.5464	ENSDART00000065864.6	77.25	8e-56	220
on.mrna.LG1.42.2	m.5459	ENSDART00000065864.6	80.78	8e-75	283
on.mrna.LG1.42.3	m.5469	ENSDART00000065864.6	80.71	4e-89	331
on.mrna.LG1.420.1	m.1062	ENSDART00000089133.5	79.74	5e-75	283
on.mrna.LG1.420.2	m.1061	ENSDART00000089133.5	79.74	4e-75	283
on.mrna.LG1.421.1	m.4514	ENSDART00000066929.6	92.59	0.15	38.2
on.mrna.LG1.422.1	m.3690	ENSDART00000171605.1	100	0.11	40.1
on.mrna.LG1.422.2	m.3685	ENSDART00000171605.1	100	0.12	40.1
on.mrna.LG1.422.3	m.3687	ENSDART00000133843.2	100	0.12	40.1
on.mrna.LG1.423.1	m.3314	ENSDART00000006180.9	81.73	3e-73	278
on.mrna.LG1.424.1	m.2626	ENSDART00000029668.8	100	0.15	38.2
on.mrna.LG1.4240001.1	m.5792	ENSDART00000109665.2	80.2	6e-40	167
on.mrna.LG1.425.1	m.2267	ENSDART00000026476.4	85	4e-33	143
on.mrna.LG1.426.1	m.1632	ENSDART00000113498.3	96	0.016	42.1
on.mrna.LG1.426.2	m.1630	ENSDART00000113498.3	96	0.015	42.1
on.mrna.LG1.426.3	m.1631	ENSDART00000113498.3	96	0.011	42.1
on.mrna.LG1.427.1	m.5509	ENSDART00000016211.5	82.31	9e-81	301
on.mrna.LG1.427.2	m.5499	ENSDART00000016211.5	82.31	9e-81	301
on.mrna.LG1.427.3	m.5502	ENSDART00000016211.5	82.31	9e-81	301
on.mrna.LG1.427.4	m.5507	ENSDART00000016211.5	82.05	4e-56	218
on.mrna.LG1.427.5	m.5505	ENSDART00000016211.5	82.05	4e-56	218
on.mrna.LG1.428.1	m.1377	ENSDART00000171691.1	81.58	0	666
on.mrna.LG1.429.1	m.2192	ENSDART00000007231.5	81.92	1e-91	337
on.mrna.LG1.43.1	m.1952	ENSDART00000098842.4	83.09	3e-16	87.7
on.mrna.LG1.431.1	m.2205	ENSDART00000102563.4	78.59	5e-18	93.7
on.mrna.LG1.432.1	m.2781	ENSDART00000004420.8	83.39	5e-106	385
on.mrna.LG1.432.2	m.2777	ENSDART00000004420.8	83.39	5e-106	385
on.mrna.LG1.432.3	m.2779	ENSDART00000004420.8	83.9	5e-97	355
on.mrna.LG1.432.4	m.2776	ENSDART00000004420.8	83.39	5e-106	385
on.mrna.LG1.432.5	m.2778	ENSDART00000004420.8	83.77	4e-78	291
on.mrna.LG1.433.1	m.5598	ENSDART00000058628.4	87.23	0.0008	46.1
on.mrna.LG1.433.2	m.5600	ENSDART00000058628.4	87.23	0.0008	46.1
on.mrna.LG1.434.1	m.3269	ENSDART00000158825.1	91.98	0	1526
on.mrna.LG1.434.1	m.3270	ENSDART00000158825.1	91.98	0	1526
on.mrna.LG1.434.2	m.3271	ENSDART00000158825.1	91.98	0	1526
on.mrna.LG1.434.2	m.3272	ENSDART00000158825.1	91.98	0	1526
on.mrna.LG1.434.3	m.3267	ENSDART00000158825.1	92.99	0	1425
on.mrna.LG1.434.3	m.3268	ENSDART00000158825.1	92.99	0	1425
on.mrna.LG1.434.4	m.3273	ENSDART00000158825.1	91.98	0	1526
on.mrna.LG1.434.4	m.3274	ENSDART00000158825.1	91.98	0	1526
on.mrna.LG1.434.5	m.3275	ENSDART00000158825.1	91.98	0	1526
on.mrna.LG1.434.5	m.3276	ENSDART00000158825.1	91.98	0	1526
on.mrna.LG1.435.1	m.3182	ENSDART00000088005.4	79.43	7e-20	99.6
on.mrna.LG1.435.2	m.3181	ENSDART00000088005.4	83.21	8e-16	85.7
on.mrna.LG1.436.1	m.3623	ENSDART00000088005.4	85.71	1e-09	65.9
on.mrna.LG1.437.1	m.1999	ENSDART00000111303.4	100	0.017	44.1
on.mrna.LG1.437.2	m.2000	ENSDART00000101168.4	83.52	8e-08	61.9
on.mrna.LG1.438.1	m.2671	ENSDART00000136217.1	80.69	0	668
on.mrna.LG1.439.1	m.263	ENSDART00000020082.7	100	1	34.2
on.mrna.LG1.44.1	m.3575	ENSDART00000021605.6	85.07	5e-22	107
on.mrna.LG1.44.2	m.3582	ENSDART00000021605.6	85.07	5e-22	107
on.mrna.LG1.440.1	m.3127	ENSDART00000077459.5	81.19	4e-22	107
on.mrna.LG1.440.2	m.3128	ENSDART00000077459.5	79.24	2e-24	115
on.mrna.LG1.440.3	m.3125	ENSDART00000077459.5	81.19	3e-22	107
on.mrna.LG1.441.1	m.869	ENSDART00000135517.2	85.06	5e-10	69.9
on.mrna.LG1.442.1	m.1653	ENSDART00000077439.4	80.93	3e-20	101
on.mrna.LG1.443.1	m.3935	ENSDART00000109927.2	90	0.0002	48.1
on.mrna.LG1.444.1	m.4841	ENSDART00000113669.3	88.1	0.002	44.1
on.mrna.LG1.445.1	m.2956	ENSDART00000077418.5	81.89	3e-54	214
on.mrna.LG1.445.2	m.2953	ENSDART00000077418.5	81.89	3e-54	214
on.mrna.LG1.446.1	m.4957	ENSDART00000040066.6	95.83	0.064	40.1
on.mrna.LG1.446.2	m.4958	ENSDART00000130358.2	100	0.13	40.1
on.mrna.LG1.447.1	m.545	ENSDART00000087565.4	90.91	0.007	42.1
on.mrna.LG1.447.2	m.547	ENSDART00000097888.4	83.13	2e-06	54
on.mrna.LG1.448.1	m.1226	ENSDART00000087111.6	89.87	2e-17	93.7
on.mrna.LG1.448.10	m.1227	ENSDART00000087111.6	80.8	1e-20	103
on.mrna.LG1.448.2	m.1224	ENSDART00000087111.6	89.87	2e-17	93.7
on.mrna.LG1.448.3	m.1222	ENSDART00000087111.6	89.87	2e-17	93.7
on.mrna.LG1.448.4	m.1229	ENSDART00000087111.6	89.87	2e-17	93.7
on.mrna.LG1.448.5	m.1232	ENSDART00000087111.6	89.87	2e-17	93.7
on.mrna.LG1.448.6	m.1225	ENSDART00000087111.6	89.87	2e-17	93.7
on.mrna.LG1.448.7	m.1228	ENSDART00000087111.6	80.8	3e-20	103
on.mrna.LG1.448.8	m.1221	ENSDART00000087111.6	80.8	2e-20	103
on.mrna.LG1.448.9	m.1231	ENSDART00000087111.6	80.8	2e-20	103
on.mrna.LG1.449.1	m.2306	ENSDART00000073757.3	100	0.15	40.1
on.mrna.LG1.449.2	m.2308	ENSDART00000073757.3	100	0.13	40.1
on.mrna.LG1.45.1	m.5845	ENSDART00000007487.8	81.98	2e-72	274
on.mrna.LG1.45.2	m.5844	ENSDART00000007487.8	81.98	2e-72	274
on.mrna.LG1.45.3	m.5842	ENSDART00000007487.8	81.84	5e-63	242
on.mrna.LG1.45.4	m.5843	ENSDART00000007487.8	81.84	6e-65	248
on.mrna.LG1.450.1	m.5832	ENSDART00000046802.6	78.04	6e-27	123
on.mrna.LG1.451.1	m.5848	ENSDART00000101655.4	100	0.014	44.1
on.mrna.LG1.452.1	m.3661	ENSDART00000105236.4	79.14	0.002	46.1
on.mrna.LG1.453.1	m.2082	ENSDART00000013170.8	81.94	3e-16	85.7
on.mrna.LG1.454.1	m.2641	ENSDART00000142833.1	100	7e-05	48.1
on.mrna.LG1.455.1	m.2310	ENSDART00000013170.8	100	0.031	42.1
on.mrna.LG1.456.1	m.3025	ENSDART00000170042.1	100	0.008	42.1
on.mrna.LG1.457.1	m.5690	ENSDART00000013170.8	82.03	9e-12	71.9
on.mrna.LG1.458.1	m.4027	ENSDART00000005927.7	100	0.075	38.2
on.mrna.LG1.459.1	m.4608	ENSDART00000013170.8	83.57	2e-18	95.6
on.mrna.LG1.46.1	m.4721	ENSDART00000164838.1	82.89	0.0005	48.1
on.mrna.LG1.460.1	m.2141	ENSDART00000115321.3	78.04	1e-32	145
on.mrna.LG1.461.1	m.3256	ENSDART00000090549.7	84.14	2e-21	105
on.mrna.LG1.461.2	m.3259	ENSDART00000121488.2	81.66	9e-17	89.7
on.mrna.LG1.461.3	m.3264	ENSDART00000121488.2	81.05	4e-23	111
on.mrna.LG1.461.4	m.3261	ENSDART00000121488.2	81.05	3e-23	111
on.mrna.LG1.462.1	m.3846	ENSDART00000173066.1	100	0.036	40.1
on.mrna.LG1.463.1	m.2349	ENSDART00000147845.2	79.35	4e-84	313
on.mrna.LG1.464.1	m.4564	ENSDART00000086164.5	78.89	3e-110	400
on.mrna.LG1.464.2	m.4561	ENSDART00000086164.5	78.89	4e-110	400
on.mrna.LG1.465.1	m.814	ENSDART00000009104.5	83.27	0	741
on.mrna.LG1.465.2	m.808	ENSDART00000009104.5	83.27	0	741
on.mrna.LG1.469.1	m.2084	ENSDART00000074264.3	100	0.25	38.2
on.mrna.LG1.47.1	m.4742	ENSDART00000045675.6	100	0.72	36.2
on.mrna.LG1.47.1	m.4743	ENSDART00000114208.3	100	2.1	34.2
on.mrna.LG1.47.2	m.4747	ENSDART00000161914.1	85.19	0.003	44.1
on.mrna.LG1.47.3	m.4749	ENSDART00000045675.6	100	0.52	36.2
on.mrna.LG1.47.3	m.4750	ENSDART00000114208.3	100	1.3	34.2
on.mrna.LG1.470.1	m.2782	ENSDART00000104249.2	88.2	4e-40	168
on.mrna.LG1.471.1	m.3806	ENSDART00000104257.3	86.03	3e-61	238
on.mrna.LG1.471.2	m.3805	ENSDART00000104257.3	86.03	2e-61	238
on.mrna.LG1.471.3	m.3808	ENSDART00000104257.3	86.03	3e-61	238
on.mrna.LG1.471.4	m.3810	ENSDART00000104257.3	86.03	3e-61	238
on.mrna.LG1.4710001.1	m.1177	ENSDART00000006443.6	100	0.13	40.1
on.mrna.LG1.4710001.2	m.1179	ENSDART00000006443.6	100	0.13	40.1
on.mrna.LG1.472.1	m.1809	ENSDART00000086220.4	100	0.29	36.2
on.mrna.LG1.473.1	m.5368	ENSDART00000101861.5	100	2.7	34.2
on.mrna.LG1.475.1	m.3249	ENSDART00000142478.2	100	0.73	36.2
on.mrna.LG1.476.1	m.4820	ENSDART00000075646.3	83.51	8e-10	65.9
on.mrna.LG1.477.1	m.2139	ENSDART00000082087.5	79.45	6e-25	115
on.mrna.LG1.477.2	m.2138	ENSDART00000082087.5	79.45	6e-25	115
on.mrna.LG1.478.1	m.3204	ENSDART00000020233.8	80.79	4e-77	291
on.mrna.LG1.479.1	m.2887	ENSDART00000128722.1	88.24	9e-28	125
on.mrna.LG1.4790001.1	m.2718	ENSDART00000128722.1	88.24	8e-28	125
on.mrna.LG1.48.1	m.1236	ENSDART00000125733.3	81.82	0.0003	48.1
on.mrna.LG1.480.1	m.1013	ENSDART00000109495.3	86.3	1e-09	65.9
on.mrna.LG1.482.1	m.4884	ENSDART00000074761.2	84.72	3e-40	167
on.mrna.LG1.482.2	m.4882	ENSDART00000074761.2	87.37	3e-18	93.7
on.mrna.LG1.483.1	m.3199	ENSDART00000110092.3	79.59	3e-22	109
on.mrna.LG1.485.1	m.2724	ENSDART00000039165.6	80.09	9e-71	268
on.mrna.LG1.4860001.1	m.1984	ENSDART00000058351.6	79.85	6e-06	52
on.mrna.LG1.487.1	m.1628	ENSDART00000012944.5	82.29	3e-76	287
on.mrna.LG1.487.2	m.1626	ENSDART00000012944.5	82.29	3e-76	287
on.mrna.LG1.488.1	m.183	ENSDART00000170659.1	78.24	2e-08	61.9
on.mrna.LG1.488.2	m.185	ENSDART00000170659.1	78.24	2e-08	61.9
on.mrna.LG1.4880001.1	m.2775	ENSDART00000102431.4	96.3	0.0004	46.1
on.mrna.LG1.489.1	m.5729	ENSDART00000009698.10	80.17	3e-76	287
on.mrna.LG1.489.2	m.5725	ENSDART00000009698.10	80.17	3e-76	287
on.mrna.LG1.489.3	m.5724	ENSDART00000009698.10	80.17	3e-76	287
on.mrna.LG1.489.4	m.5728	ENSDART00000009698.10	80.17	3e-76	287
on.mrna.LG1.489.5	m.5722	ENSDART00000009698.10	80.17	3e-76	287
on.mrna.LG1.489.6	m.5727	ENSDART00000009698.10	80.17	3e-76	287
on.mrna.LG1.489.7	m.5723	ENSDART00000009698.10	80.17	3e-76	287
on.mrna.LG1.489.8	m.5726	ENSDART00000009698.10	80.17	2e-76	287
on.mrna.LG1.490.1	m.1233	ENSDART00000073397.6	80.93	3e-108	394
on.mrna.LG1.491.1	m.5708	ENSDART00000085087.5	81.82	1e-07	60
on.mrna.LG1.4910001.1	m.2510	ENSDART00000040627.5	100	0.021	40.1
on.mrna.LG1.492.1	m.3607	ENSDART00000136555.3	79.6	0	813
on.mrna.LG1.492.2	m.3615	ENSDART00000136555.3	79.6	0	813
on.mrna.LG1.493.1	m.4188	ENSDART00000173453.1	89.42	0	973
on.mrna.LG1.493.2	m.4186	ENSDART00000173453.1	89.26	0	874
on.mrna.LG1.493.3	m.4190	ENSDART00000173453.1	89.4	0	872
on.mrna.LG1.493.4	m.4180	ENSDART00000173453.1	89.4	0	872
on.mrna.LG1.493.5	m.4184	ENSDART00000173453.1	89.53	0	704
on.mrna.LG1.493.6	m.4182	ENSDART00000173453.1	89.33	9e-173	607
on.mrna.LG1.494.1	m.1892	ENSDART00000075538.5	89.47	0.004	44.1
on.mrna.LG1.495.1	m.1783	ENSDART00000162784.1	92.11	2e-05	52
on.mrna.LG1.495.1	m.1785	ENSDART00000123712.1	95.24	3.2	34.2
on.mrna.LG1.4950001.1	m.3443	ENSDART00000081468.5	100	0.38	36.2
on.mrna.LG1.496.1	m.5414	ENSDART00000055936.4	81.03	4e-67	256
on.mrna.LG1.496.2	m.5410	ENSDART00000055936.4	83.78	2e-75	283
on.mrna.LG1.496.3	m.5412	ENSDART00000055936.4	83.78	2e-75	283
on.mrna.LG1.496.4	m.5416	ENSDART00000055936.4	83.78	2e-75	283
on.mrna.LG1.497.1	m.5907	ENSDART00000086190.5	78.86	3e-19	97.6
on.mrna.LG1.498.1	m.4956	ENSDART00000050230.5	79.96	2e-50	200
on.mrna.LG1.499.1	m.982	ENSDART00000008013.5	83.87	6e-102	371
on.mrna.LG1.5.1	m.4476	ENSDART00000132656.1	90.43	5e-25	115
on.mrna.LG1.50.1	m.141	ENSDART00000131780.2	100	0.14	40.1
on.mrna.LG1.500.1	m.577	ENSDART00000110843.3	85.71	1e-21	107
on.mrna.LG1.500.10	m.584	ENSDART00000110843.3	85.71	1e-21	107
on.mrna.LG1.500.11	m.590	ENSDART00000110843.3	85.71	1e-21	107
on.mrna.LG1.500.2	m.561	ENSDART00000110843.3	85.71	1e-21	107
on.mrna.LG1.500.3	m.568	ENSDART00000110843.3	85.71	1e-21	107
on.mrna.LG1.500.4	m.587	ENSDART00000110843.3	85.71	1e-21	107
on.mrna.LG1.500.5	m.580	ENSDART00000110843.3	85.71	1e-21	107
on.mrna.LG1.500.6	m.574	ENSDART00000110843.3	85.71	1e-21	107
on.mrna.LG1.500.7	m.565	ENSDART00000110843.3	85.71	1e-21	107
on.mrna.LG1.500.8	m.558	ENSDART00000110843.3	85.71	1e-21	107
on.mrna.LG1.500.9	m.571	ENSDART00000110843.3	85.71	1e-21	107
on.mrna.LG1.5000001.1	m.2042	ENSDART00000173020.1	100	0.089	38.2
on.mrna.LG1.5000002.1	m.2875	ENSDART00000023831.5	78.11	9e-45	182
on.mrna.LG1.501.1	m.1678	ENSDART00000113280.3	87.5	5e-16	87.7
on.mrna.LG1.502.1	m.596	ENSDART00000100482.4	100	0.22	38.2
on.mrna.LG1.503.1	m.2125	ENSDART00000109257.4	84	3e-16	89.7
on.mrna.LG1.503.2	m.2121	ENSDART00000109257.4	84	3e-16	89.7
on.mrna.LG1.504.1	m.4168	ENSDART00000002075.9	84.11	7e-23	109
on.mrna.LG1.504.2	m.4166	ENSDART00000002075.9	77.83	4e-05	50.1
on.mrna.LG1.505.1	m.615	ENSDART00000046689.6	87.84	6e-13	75.8
on.mrna.LG1.506.1	m.310	ENSDART00000004692.8	82.65	5e-114	412
on.mrna.LG1.507.1	m.5085	ENSDART00000002892.4	83.63	6e-93	343
on.mrna.LG1.507.2	m.5081	ENSDART00000002892.4	83.63	5e-93	343
on.mrna.LG1.507.3	m.5083	ENSDART00000002892.4	83.63	6e-93	343
on.mrna.LG1.507.4	m.5079	ENSDART00000002892.4	83.63	6e-93	343
on.mrna.LG1.507.5	m.5087	ENSDART00000002892.4	83.63	5e-93	343
on.mrna.LG1.508.1	m.983	ENSDART00000163369.1	79.15	1e-54	216
on.mrna.LG1.508.2	m.985	ENSDART00000163369.1	79.15	1e-54	216
on.mrna.LG1.508.3	m.984	ENSDART00000163369.1	79.18	1e-50	202
on.mrna.LG1.508.4	m.986	ENSDART00000042074.7	80.38	2e-43	178
on.mrna.LG1.51.1	m.897	ENSDART00000123887.2	87.72	5e-07	58
on.mrna.LG1.51.2	m.901	ENSDART00000123887.2	87.72	6e-07	58
on.mrna.LG1.51.3	m.893	ENSDART00000123887.2	87.72	6e-07	58
on.mrna.LG1.510.1	m.2021	ENSDART00000099511.3	83.4	1e-41	172
on.mrna.LG1.510.2	m.2025	ENSDART00000099511.3	83.4	1e-41	172
on.mrna.LG1.512.1	m.3153	ENSDART00000055567.4	84.62	6e-20	99.6
on.mrna.LG1.513.1	m.1666	ENSDART00000003913.9	100	1.4	36.2
on.mrna.LG1.513.10	m.1668	ENSDART00000003913.9	100	1.2	36.2
on.mrna.LG1.513.11	m.1674	ENSDART00000003913.9	100	1.2	36.2
on.mrna.LG1.513.2	m.1672	ENSDART00000003913.9	100	1.4	36.2
on.mrna.LG1.513.3	m.1658	ENSDART00000003913.9	100	1.3	36.2
on.mrna.LG1.513.4	m.1676	ENSDART00000003913.9	100	1.3	36.2
on.mrna.LG1.513.5	m.1662	ENSDART00000003913.9	100	1.4	36.2
on.mrna.LG1.513.6	m.1660	ENSDART00000003913.9	100	1.4	36.2
on.mrna.LG1.513.7	m.1664	ENSDART00000003913.9	100	1.4	36.2
on.mrna.LG1.513.8	m.1670	ENSDART00000003913.9	100	1.4	36.2
on.mrna.LG1.513.9	m.1656	ENSDART00000003913.9	100	1.3	36.2
on.mrna.LG1.514.1	m.4441	ENSDART00000148490.2	83.71	2e-26	123
on.mrna.LG1.514.10	m.4445	ENSDART00000148490.2	83.77	7e-175	617
on.mrna.LG1.514.11	m.4455	ENSDART00000148490.2	83.83	4e-173	611
on.mrna.LG1.514.12	m.4467	ENSDART00000148490.2	83.77	7e-175	617
on.mrna.LG1.514.2	m.4469	ENSDART00000148490.2	83.71	2e-26	123
on.mrna.LG1.514.3	m.4465	ENSDART00000148490.2	83.77	7e-175	617
on.mrna.LG1.514.4	m.4471	ENSDART00000148490.2	83.77	8e-175	617
on.mrna.LG1.514.5	m.4443	ENSDART00000148490.2	83.83	4e-173	611
on.mrna.LG1.514.6	m.4447	ENSDART00000148490.2	83.83	5e-173	611
on.mrna.LG1.514.7	m.4461	ENSDART00000148490.2	83.77	7e-175	617
on.mrna.LG1.514.8	m.4457	ENSDART00000148490.2	83.83	5e-173	611
on.mrna.LG1.514.9	m.4450	ENSDART00000148490.2	83.83	5e-173	611
on.mrna.LG1.515.1	m.2554	ENSDART00000122377.2	84.62	0.031	40.1
on.mrna.LG1.515.2	m.2551	ENSDART00000122377.2	84.62	0.031	40.1
on.mrna.LG1.515.3	m.2553	ENSDART00000122377.2	84.62	0.038	40.1
on.mrna.LG1.516.1	m.67	ENSDART00000077724.5	86.06	3e-56	220
on.mrna.LG1.516.2	m.69	ENSDART00000077724.5	86.06	3e-56	220
on.mrna.LG1.516.3	m.62	ENSDART00000077724.5	86.06	3e-56	220
on.mrna.LG1.516.4	m.65	ENSDART00000077724.5	86.06	3e-56	220
on.mrna.LG1.516.5	m.60	ENSDART00000077724.5	86.06	3e-56	220
on.mrna.LG1.517.1	m.4221	ENSDART00000088037.5	83.02	0	745
on.mrna.LG1.517.1	m.4222	ENSDART00000088037.5	80.6	6e-52	206
on.mrna.LG1.517.2	m.4226	ENSDART00000088037.5	83.02	0	745
on.mrna.LG1.517.2	m.4227	ENSDART00000088037.5	80.6	6e-52	206
on.mrna.LG1.517.3	m.4231	ENSDART00000088037.5	83.02	0	745
on.mrna.LG1.517.3	m.4232	ENSDART00000088037.5	80.6	6e-52	206
on.mrna.LG1.517.4	m.4236	ENSDART00000088037.5	83.02	0	745
on.mrna.LG1.517.4	m.4237	ENSDART00000088037.5	80.6	6e-52	206
on.mrna.LG1.518.1	m.3129	ENSDART00000041597.2	83.2	1e-34	147
on.mrna.LG1.519.1	m.2844	ENSDART00000059208.4	88.8	1e-31	137
on.mrna.LG1.519.2	m.2842	ENSDART00000059208.4	88.8	1e-31	137
on.mrna.LG1.519.3	m.2843	ENSDART00000059208.4	88.8	1e-31	137
on.mrna.LG1.519.4	m.2841	ENSDART00000059208.4	85.62	4e-31	135
on.mrna.LG1.520.1	m.4365	ENSDART00000059208.4	89.36	2e-06	54
on.mrna.LG1.522.1	m.1878	ENSDART00000164933.1	84.21	2e-14	83.8
on.mrna.LG1.522.2	m.1845	ENSDART00000157535.1	86.47	2e-34	151
on.mrna.LG1.522.3	m.1862	ENSDART00000157535.1	86.47	2e-34	151
on.mrna.LG1.524.1	m.538	ENSDART00000113467.4	87.34	1e-12	77.8
on.mrna.LG1.526.1	m.5225	ENSDART00000006078.9	82.71	3e-97	357
on.mrna.LG1.527.1	m.2604	ENSDART00000014582.8	82.55	3e-40	167
on.mrna.LG1.527.2	m.2607	ENSDART00000014582.8	82.55	3e-40	167
on.mrna.LG1.5270001.1	m.2194	ENSDART00000099439.4	100	0.98	34.2
on.mrna.LG1.528.1	m.2390	ENSDART00000033591.7	82.56	1e-05	52
on.mrna.LG1.528.2	m.2392	ENSDART00000033591.7	82.56	1e-05	52
on.mrna.LG1.528.3	m.2396	ENSDART00000033591.7	82.56	1e-05	52
on.mrna.LG1.528.4	m.2394	ENSDART00000033591.7	82.56	1e-05	52
on.mrna.LG1.529.1	m.1614	ENSDART00000098390.4	87.72	3e-07	58
on.mrna.LG1.529.2	m.1618	ENSDART00000098390.4	87.72	3e-07	58
on.mrna.LG1.529.3	m.1616	ENSDART00000098390.4	87.72	3e-07	58
on.mrna.LG1.53.1	m.138	ENSDART00000025635.8	100	0.59	36.2
on.mrna.LG1.531.1	m.2324	ENSDART00000166044.1	96	0.005	42.1
on.mrna.LG1.532.1	m.3131	ENSDART00000170663.2	87.39	4e-25	117
on.mrna.LG1.532.2	m.3143	ENSDART00000170663.2	87.39	3e-25	117
on.mrna.LG1.532.3	m.3133	ENSDART00000170663.2	83.33	6e-52	206
on.mrna.LG1.532.4	m.3140	ENSDART00000170663.2	83.33	5e-52	206
on.mrna.LG1.532.5	m.3135	ENSDART00000170663.2	83.33	6e-52	206
on.mrna.LG1.533.1	m.3850	ENSDART00000159481.2	81.69	5e-166	585
on.mrna.LG1.533.2	m.3849	ENSDART00000159481.2	81.5	8e-156	551
on.mrna.LG1.534.1	m.2075	ENSDART00000159299.1	85.29	2e-31	139
on.mrna.LG1.536.1	m.3911	ENSDART00000021372.5	80.07	2e-61	238
on.mrna.LG1.536.2	m.3910	ENSDART00000021372.5	80.07	2e-61	238
on.mrna.LG1.536.3	m.3912	ENSDART00000021372.5	80.07	1e-61	238
on.mrna.LG1.5360001.1	m.2699	ENSDART00000110774.2	84.62	8e-05	50.1
on.mrna.LG1.5360002.1	m.3085	ENSDART00000110774.2	84.62	9e-05	50.1
on.mrna.LG1.5360002.1	m.3086	ENSDART00000110774.2	84.62	6e-05	50.1
on.mrna.LG1.537.1	m.3461	ENSDART00000110774.2	82.95	3e-14	81.8
on.mrna.LG1.537.2	m.3462	ENSDART00000110774.2	82.95	3e-14	81.8
on.mrna.LG1.5370001.1	m.4952	ENSDART00000080852.4	95.45	1.4	36.2
on.mrna.LG1.5370002.1	m.2201	ENSDART00000080852.4	95.45	0.83	36.2
on.mrna.LG1.538.1	m.5622	ENSDART00000064403.6	78.15	1e-12	75.8
on.mrna.LG1.538.2	m.5626	ENSDART00000064403.6	78.15	1e-12	75.8
on.mrna.LG1.538.3	m.5624	ENSDART00000064403.6	78.15	1e-12	75.8
on.mrna.LG1.538.4	m.5620	ENSDART00000064403.6	79.77	8e-10	65.9
on.mrna.LG1.538.5	m.5618	ENSDART00000064403.6	79.77	8e-10	65.9
on.mrna.LG1.54.1	m.5341	ENSDART00000099988.4	82.09	2e-46	188
on.mrna.LG1.54.2	m.5343	ENSDART00000099988.4	82.09	2e-46	188
on.mrna.LG1.540.1	m.5520	ENSDART00000134144.1	90.38	6e-09	63.9
on.mrna.LG1.540.1	m.5521	ENSDART00000134144.1	90.38	4e-09	63.9
on.mrna.LG1.541.1	m.4751	ENSDART00000167229.1	82.44	0	662
on.mrna.LG1.541.10	m.4765	ENSDART00000170888.1	81.18	0	765
on.mrna.LG1.541.11	m.4755	ENSDART00000170888.1	81.18	0	765
on.mrna.LG1.541.12	m.4787	ENSDART00000170888.1	81.18	0	765
on.mrna.LG1.541.13	m.4803	ENSDART00000167229.1	80.67	0	702
on.mrna.LG1.541.2	m.4798	ENSDART00000170888.1	82.36	0	728
on.mrna.LG1.541.3	m.4782	ENSDART00000170888.1	82.36	0	728
on.mrna.LG1.541.4	m.4759	ENSDART00000170888.1	82.36	0	728
on.mrna.LG1.541.5	m.4777	ENSDART00000170888.1	82.36	0	728
on.mrna.LG1.541.6	m.4791	ENSDART00000167229.1	82.45	0	690
on.mrna.LG1.541.7	m.4794	ENSDART00000170888.1	82.36	0	728
on.mrna.LG1.541.8	m.4773	ENSDART00000167229.1	82.44	0	662
on.mrna.LG1.541.9	m.4769	ENSDART00000167229.1	82.44	0	662
on.mrna.LG1.546.1	m.4216	ENSDART00000113842.4	81.58	0.12	40.1
on.mrna.LG1.547.1	m.3557	ENSDART00000005053.10	81.67	0	728
on.mrna.LG1.548.1	m.5821	ENSDART00000074963.3	83.05	7e-24	113
on.mrna.LG1.548.2	m.5815	ENSDART00000074963.3	83.05	6e-24	113
on.mrna.LG1.548.3	m.5811	ENSDART00000074963.3	83.05	6e-24	113
on.mrna.LG1.548.4	m.5818	ENSDART00000074963.3	83.05	6e-24	113
on.mrna.LG1.548.5	m.5808	ENSDART00000074963.3	83.05	6e-24	113
on.mrna.LG1.548.6	m.5805	ENSDART00000074963.3	83.05	7e-24	113
on.mrna.LG1.549.1	m.5035	ENSDART00000026712.7	80.33	3e-131	470
on.mrna.LG1.549.2	m.5039	ENSDART00000026712.7	80.33	3e-131	470
on.mrna.LG1.55.1	m.4679	ENSDART00000074587.6	88.24	7e-17	89.7
on.mrna.LG1.55.2	m.4676	ENSDART00000074587.6	88.24	7e-17	89.7
on.mrna.LG1.550.1	m.3644	ENSDART00000043857.4	90.38	1e-28	129
on.mrna.LG1.550.2	m.3632	ENSDART00000043857.4	90.38	1e-28	129
on.mrna.LG1.550.3	m.3650	ENSDART00000043857.4	90.38	1e-28	129
on.mrna.LG1.550.4	m.3638	ENSDART00000043857.4	90.38	1e-28	129
on.mrna.LG1.554.1	m.4946	ENSDART00000043857.4	84.71	9e-139	494
on.mrna.LG1.554.2	m.4945	ENSDART00000043857.4	84.53	1e-148	527
on.mrna.LG1.555.1	m.5854	ENSDART00000162850.2	84.38	2e-141	504
on.mrna.LG1.556.1	m.344	ENSDART00000130028.3	88.71	2e-30	135
on.mrna.LG1.556.2	m.348	ENSDART00000130028.3	88.71	2e-30	135
on.mrna.LG1.556.3	m.346	ENSDART00000130028.3	88.71	2e-30	135
on.mrna.LG1.557.1	m.1030	ENSDART00000029565.7	81.49	1e-79	297
on.mrna.LG1.557.2	m.1031	ENSDART00000029565.7	81.49	1e-79	297
on.mrna.LG1.557.3	m.1028	ENSDART00000029565.7	81.49	1e-79	297
on.mrna.LG1.557.4	m.1032	ENSDART00000029565.7	81.07	2e-55	216
on.mrna.LG1.557.5	m.1029	ENSDART00000029565.7	83.52	2e-27	123
on.mrna.LG1.558.1	m.4028	ENSDART00000027807.9	79.37	0	1138
on.mrna.LG1.559.1	m.2536	ENSDART00000047528.5	100	0.022	42.1
on.mrna.LG1.56.1	m.3932	ENSDART00000012241.9	81.13	1e-85	319
on.mrna.LG1.56.2	m.3928	ENSDART00000012241.9	81.13	1e-85	319
on.mrna.LG1.56.3	m.3931	ENSDART00000012241.9	80.93	2e-93	345
on.mrna.LG1.56.4	m.3933	ENSDART00000012241.9	80.93	2e-93	345
on.mrna.LG1.56.5	m.3929	ENSDART00000012241.9	80.93	2e-93	345
on.mrna.LG1.560.1	m.4276	ENSDART00000113342.4	80.95	1e-87	325
on.mrna.LG1.561.1	m.3162	ENSDART00000111842.4	82.02	4e-86	321
on.mrna.LG1.561.2	m.3166	ENSDART00000111842.4	83.55	1e-67	260
on.mrna.LG1.561.3	m.3158	ENSDART00000111842.4	82.02	4e-86	321
on.mrna.LG1.561.4	m.3169	ENSDART00000111842.4	83.55	1e-67	260
on.mrna.LG1.562.1	m.5688	ENSDART00000084249.5	80.19	5e-122	440
on.mrna.LG1.562.2	m.5678	ENSDART00000084249.5	80.19	4e-122	440
on.mrna.LG1.562.3	m.5684	ENSDART00000084249.5	80.19	4e-122	440
on.mrna.LG1.562.4	m.5680	ENSDART00000084249.5	80.19	4e-122	440
on.mrna.LG1.562.5	m.5674	ENSDART00000084249.5	80.19	3e-122	440
on.mrna.LG1.562.6	m.5676	ENSDART00000084249.5	80.19	3e-122	440
on.mrna.LG1.562.7	m.5682	ENSDART00000084249.5	80.19	3e-122	440
on.mrna.LG1.562.8	m.5686	ENSDART00000084249.5	80.19	3e-122	440
on.mrna.LG1.5620001.1	m.3987	ENSDART00000052380.5	86.54	0.0007	48.1
on.mrna.LG1.5620001.2	m.3988	ENSDART00000052380.5	86.54	0.0007	48.1
on.mrna.LG1.5620002.1	m.544	ENSDART00000067762.6	100	1.6	34.2
on.mrna.LG1.563.1	m.4624	ENSDART00000052379.6	79.32	9e-51	202
on.mrna.LG1.564.1	m.2450	ENSDART00000143300.2	80.66	2e-18	95.6
on.mrna.LG1.565.1	m.2074	ENSDART00000143300.2	80.82	1e-10	67.9
on.mrna.LG1.566.1	m.4361	ENSDART00000084266.5	82.01	1e-98	363
on.mrna.LG1.566.2	m.4363	ENSDART00000084266.5	82.01	1e-98	363
on.mrna.LG1.5660001.1	m.3707	ENSDART00000113148.5	100	0.072	38.2
on.mrna.LG1.567.1	m.3624	ENSDART00000084282.6	79.32	5e-58	228
on.mrna.LG1.568.1	m.5474	ENSDART00000134177.1	91.89	5e-05	50.1
on.mrna.LG1.569.1	m.4165	ENSDART00000134177.1	92.5	8e-07	56
on.mrna.LG1.57.1	m.4431	ENSDART00000045679.8	83.51	0	741
on.mrna.LG1.57.2	m.4427	ENSDART00000045679.8	83.62	0	676
on.mrna.LG1.57.3	m.4425	ENSDART00000045679.8	83.51	0	741
on.mrna.LG1.57.4	m.4433	ENSDART00000045679.8	83.62	0	676
on.mrna.LG1.57.5	m.4436	ENSDART00000045679.8	83.51	0	741
on.mrna.LG1.57.6	m.4434	ENSDART00000045679.8	83.62	0	676
on.mrna.LG1.57.7	m.4426	ENSDART00000045679.8	83.51	0	741
on.mrna.LG1.57.8	m.4432	ENSDART00000045679.8	83.51	0	741
on.mrna.LG1.57.9	m.4429	ENSDART00000045679.8	83.51	0	741
on.mrna.LG1.570.1	m.3518	ENSDART00000169974.1	89.23	5e-12	73.8
on.mrna.LG1.570.2	m.3516	ENSDART00000169974.1	89.23	5e-12	73.8
on.mrna.LG1.570.3	m.3520	ENSDART00000169974.1	89.23	5e-12	73.8
on.mrna.LG1.571.1	m.4438	ENSDART00000157564.1	85.22	6e-130	466
on.mrna.LG1.572.1	m.3386	ENSDART00000162513.1	81.16	2e-137	490
on.mrna.LG1.572.2	m.3383	ENSDART00000162513.1	80.72	0	662
on.mrna.LG1.573.1	m.4373	ENSDART00000164374.1	82.03	3e-102	375
on.mrna.LG1.573.2	m.4377	ENSDART00000164374.1	82.03	3e-102	375
on.mrna.LG1.573.3	m.4371	ENSDART00000164374.1	82.03	3e-102	375
on.mrna.LG1.573.4	m.4375	ENSDART00000162633.1	82.75	1e-63	246
on.mrna.LG1.573.5	m.4370	ENSDART00000162633.1	82.75	2e-63	246
on.mrna.LG1.573.6	m.4376	ENSDART00000162633.1	82.75	1e-63	246
on.mrna.LG1.574.1	m.2252	ENSDART00000157434.1	83.68	2e-29	131
on.mrna.LG1.574.2	m.2245	ENSDART00000157434.1	83.68	3e-29	131
on.mrna.LG1.574.3	m.2248	ENSDART00000157434.1	83.68	3e-29	131
on.mrna.LG1.575.1	m.2521	ENSDART00000109605.3	86.41	1e-17	93.7
on.mrna.LG1.575.2	m.2526	ENSDART00000109605.3	84.95	2e-38	163
on.mrna.LG1.575.3	m.2523	ENSDART00000109605.3	84.95	2e-38	163
on.mrna.LG1.576.1	m.530	ENSDART00000142665.2	82.01	2e-118	426
on.mrna.LG1.576.2	m.529	ENSDART00000142665.2	82.01	2e-118	426
on.mrna.LG1.576.3	m.531	ENSDART00000142665.2	82.01	2e-118	426
on.mrna.LG1.576.4	m.528	ENSDART00000142665.2	82.01	2e-118	426
on.mrna.LG1.577.1	m.1270	ENSDART00000045284.6	95.65	0.29	38.2
on.mrna.LG1.577.2	m.1267	ENSDART00000045284.6	95.65	0.27	38.2
on.mrna.LG1.578.1	m.4874	ENSDART00000073629.4	100	6.2	34.2
on.mrna.LG1.579.1	m.5372	ENSDART00000171881.1	79.1	1e-59	232
on.mrna.LG1.58.1	m.3676	ENSDART00000074729.5	81.66	1e-52	210
on.mrna.LG1.58.2	m.3679	ENSDART00000074729.5	81.66	1e-52	210
on.mrna.LG1.58.3	m.3673	ENSDART00000074729.5	81.66	1e-52	210
on.mrna.LG1.580.1	m.5029	ENSDART00000110287.3	100	0.62	36.2
on.mrna.LG1.581.1	m.1597	ENSDART00000114158.3	91.43	0.003	46.1
on.mrna.LG1.581.1	m.1599	ENSDART00000125309.2	95.83	0.066	40.1
on.mrna.LG1.582.1	m.482	ENSDART00000158040.1	82.18	7e-37	157
on.mrna.LG1.583.1	m.2799	ENSDART00000034523.7	84.87	9e-26	119
on.mrna.LG1.583.2	m.2801	ENSDART00000034523.7	81.72	2e-36	155
on.mrna.LG1.583.3	m.2804	ENSDART00000131402.2	100	0.057	40.1
on.mrna.LG1.583.4	m.2800	ENSDART00000034523.7	77.96	2e-40	168
on.mrna.LG1.583.5	m.2797	ENSDART00000165180.1	83.14	2e-39	165
on.mrna.LG1.583.6	m.2795	ENSDART00000165180.1	79.74	8e-114	412
on.mrna.LG1.583.7	m.2793	ENSDART00000165180.1	79.58	1e-118	428
on.mrna.LG1.583.8	m.2791	ENSDART00000165180.1	79.21	9e-61	236
on.mrna.LG1.583.9	m.2802	ENSDART00000165180.1	79.85	3e-85	317
on.mrna.LG1.584.1	m.861	ENSDART00000003418.9	100	0.005	44.1
on.mrna.LG1.584.2	m.859	ENSDART00000003418.9	100	0.004	44.1
on.mrna.LG1.584.3	m.858	ENSDART00000003418.9	100	0.005	44.1
on.mrna.LG1.584.4	m.862	ENSDART00000003418.9	100	0.005	44.1
on.mrna.LG1.5840001.1	m.3814	ENSDART00000097696.1	82.35	0.041	40.1
on.mrna.LG1.585.1	m.1944	ENSDART00000121503.2	83.44	5e-22	105
on.mrna.LG1.587.1	m.3028	ENSDART00000098076.4	80.73	7e-144	511
on.mrna.LG1.587.2	m.3026	ENSDART00000098076.4	80.73	7e-144	511
on.mrna.LG1.587.3	m.3027	ENSDART00000098076.4	80.73	7e-144	511
on.mrna.LG1.588.1	m.3061	ENSDART00000067373.4	81.72	9e-20	99.6
on.mrna.LG1.588.2	m.3060	ENSDART00000067373.4	81.72	1e-19	99.6
on.mrna.LG1.589.1	m.3718	ENSDART00000161538.1	81.2	4e-07	58
on.mrna.LG1.589.2	m.3717	ENSDART00000161538.1	80	1e-06	56
on.mrna.LG1.59.1	m.2483	ENSDART00000139441.1	80.24	1e-62	242
on.mrna.LG1.590.1	m.3370	ENSDART00000009393.7	100	0.004	44.1
on.mrna.LG1.591.1	m.2725	ENSDART00000108524.3	100	0.33	38.2
on.mrna.LG1.592.1	m.5586	ENSDART00000130810.2	100	0.11	38.2
on.mrna.LG1.593.1	m.5061	ENSDART00000113713.2	100	0.67	36.2
on.mrna.LG1.594.1	m.1543	ENSDART00000131482.1	100	1.2	34.2
on.mrna.LG1.595.1	m.341	ENSDART00000165603.1	82.24	3e-45	184
on.mrna.LG1.596.1	m.2877	ENSDART00000157801.1	83.78	2e-21	103
on.mrna.LG1.596.2	m.2879	ENSDART00000157801.1	83.78	2e-21	103
on.mrna.LG1.596.3	m.2885	ENSDART00000157801.1	83.78	2e-21	103
on.mrna.LG1.596.4	m.2883	ENSDART00000157801.1	83.78	2e-21	103
on.mrna.LG1.596.5	m.2881	ENSDART00000157801.1	83.78	2e-21	103
on.mrna.LG1.596.6	m.2876	ENSDART00000157801.1	90.32	0.1	38.2
on.mrna.LG1.597.1	m.268	ENSDART00000138087.1	84.13	2e-45	182
on.mrna.LG1.599.1	m.2237	ENSDART00000080160.6	87.02	1e-27	125
on.mrna.LG1.599.2	m.2235	ENSDART00000080160.6	87.02	1e-27	125
on.mrna.LG1.599.3	m.2239	ENSDART00000080160.6	83.33	2e-22	107
on.mrna.LG1.599.4	m.2236	ENSDART00000080160.6	83.33	2e-22	107
on.mrna.LG1.599.5	m.2238	ENSDART00000080160.6	83.33	2e-22	107
on.mrna.LG1.599.6	m.2233	ENSDART00000080160.6	87.02	1e-27	125
on.mrna.LG1.599.7	m.2234	ENSDART00000080160.6	87.02	1e-27	125
on.mrna.LG1.6.1	m.962	ENSDART00000162653.1	84.12	5e-27	123
on.mrna.LG1.6.2	m.960	ENSDART00000162653.1	84.12	7e-27	123
on.mrna.LG1.600.1	m.5720	ENSDART00000010189.6	78.25	9e-34	145
on.mrna.LG1.600.2	m.5711	ENSDART00000010189.6	78.25	9e-34	145
on.mrna.LG1.600.3	m.5713	ENSDART00000010189.6	82.16	5e-64	248
on.mrna.LG1.601.1	m.828	ENSDART00000109315.3	100	0.09	38.2
on.mrna.LG1.603.1	m.3848	ENSDART00000058339.6	82.85	4e-94	345
on.mrna.LG1.604.1	m.3368	ENSDART00000128183.3	85.58	8e-16	87.7
on.mrna.LG1.605.1	m.2984	ENSDART00000128183.3	81.03	1e-17	93.7
on.mrna.LG1.605.2	m.2982	ENSDART00000128183.3	81.03	1e-17	93.7
on.mrna.LG1.607.1	m.72	ENSDART00000124676.3	85.33	3e-08	61.9
on.mrna.LG1.607.1	m.73	ENSDART00000124676.3	86.15	4e-07	58
on.mrna.LG1.607.2	m.82	ENSDART00000124676.3	85.33	3e-08	61.9
on.mrna.LG1.607.2	m.83	ENSDART00000124676.3	86.15	4e-07	58
on.mrna.LG1.607.3	m.77	ENSDART00000124676.3	85.33	3e-08	61.9
on.mrna.LG1.607.3	m.78	ENSDART00000124676.3	86.15	4e-07	58
on.mrna.LG1.608.1	m.5402	ENSDART00000031049.7	81.06	5e-33	145
on.mrna.LG1.608.2	m.5406	ENSDART00000031049.7	81.06	5e-33	145
on.mrna.LG1.609.1	m.5219	ENSDART00000091727.5	85.8	5e-35	151
on.mrna.LG1.609.1	m.5220	ENSDART00000091727.5	85.8	5e-35	151
on.mrna.LG1.61.1	m.3178	ENSDART00000090310.4	82.33	6e-127	456
on.mrna.LG1.610.1	m.5514	ENSDART00000055609.3	100	0.016	40.1
on.mrna.LG1.6100001.1	m.4822	ENSDART00000123157.2	100	0.3	36.2
on.mrna.LG1.611.1	m.3459	ENSDART00000027331.9	83.93	0.048	40.1
on.mrna.LG1.611.2	m.3457	ENSDART00000027331.9	83.93	0.049	40.1
on.mrna.LG1.612.1	m.4898	ENSDART00000112980.4	86.49	1e-10	67.9
on.mrna.LG1.613.1	m.5983	ENSDART00000158517.2	82.09	0	983
on.mrna.LG1.613.2	m.5981	ENSDART00000158517.2	81.99	0	646
on.mrna.LG1.613.3	m.5985	ENSDART00000158517.2	81.99	0	646
on.mrna.LG1.613.4	m.5984	ENSDART00000158517.2	81.99	0	646
on.mrna.LG1.613.5	m.5982	ENSDART00000158517.2	82.09	0	983
on.mrna.LG1.614.1	m.515	ENSDART00000065211.3	95.65	0.16	38.2
on.mrna.LG1.615.1	m.2736	ENSDART00000156832.2	79.78	1e-120	436
on.mrna.LG1.615.2	m.2731	ENSDART00000156832.2	79.78	1e-120	436
on.mrna.LG1.615.3	m.2726	ENSDART00000156832.2	79.92	2e-76	289
on.mrna.LG1.616.1	m.2706	ENSDART00000008808.8	81.15	2e-79	297
on.mrna.LG1.616.2	m.2708	ENSDART00000008808.8	81.15	2e-79	297
on.mrna.LG1.616.3	m.2710	ENSDART00000008808.8	81.14	9e-69	262
on.mrna.LG1.617.1	m.3982	ENSDART00000108712.3	87.66	2e-36	155
on.mrna.LG1.617.2	m.3980	ENSDART00000108712.3	87.66	3e-36	155
on.mrna.LG1.618.1	m.3439	ENSDART00000075743.5	80.36	4e-61	238
on.mrna.LG1.618.2	m.3419	ENSDART00000075743.5	80.36	4e-61	238
on.mrna.LG1.618.3	m.3415	ENSDART00000075743.5	84.6	6e-113	410
on.mrna.LG1.618.4	m.3427	ENSDART00000075743.5	84.6	5e-113	410
on.mrna.LG1.618.5	m.3431	ENSDART00000075743.5	81.16	0	749
on.mrna.LG1.618.6	m.3411	ENSDART00000075743.5	81.16	0	749
on.mrna.LG1.618.7	m.3423	ENSDART00000075743.5	81.16	0	749
on.mrna.LG1.618.8	m.3435	ENSDART00000075743.5	81.16	0	749
on.mrna.LG1.619.1	m.5630	ENSDART00000099984.3	81.09	2e-59	230
on.mrna.LG1.62.1	m.3854	ENSDART00000090334.4	84.12	2e-40	168
on.mrna.LG1.62.2	m.3862	ENSDART00000100104.3	85.71	0.0003	48.1
on.mrna.LG1.62.3	m.3851	ENSDART00000090334.4	84.38	1e-25	119
on.mrna.LG1.62.4	m.3859	ENSDART00000138103.1	83.91	1e-28	129
on.mrna.LG1.621.1	m.4198	ENSDART00000013363.8	87.38	4e-20	101
on.mrna.LG1.621.2	m.4207	ENSDART00000013363.8	87.38	4e-20	101
on.mrna.LG1.623.1	m.5878	ENSDART00000109942.3	82.35	2e-22	109
on.mrna.LG1.623.2	m.5881	ENSDART00000109942.3	82.35	2e-22	109
on.mrna.LG1.623.3	m.5880	ENSDART00000109942.3	82.35	2e-22	109
on.mrna.LG1.623.4	m.5879	ENSDART00000109942.3	82.35	2e-22	109
on.mrna.LG1.623.5	m.5882	ENSDART00000109942.3	82.35	2e-22	109
on.mrna.LG1.624.1	m.2035	ENSDART00000005740.10	84.66	5e-77	289
on.mrna.LG1.624.2	m.2037	ENSDART00000005740.10	84.66	5e-77	289
on.mrna.LG1.626.1	m.3289	ENSDART00000112930.3	89.47	0.015	44.1
on.mrna.LG1.626.2	m.3303	ENSDART00000112930.3	89.47	0.014	44.1
on.mrna.LG1.626.3	m.3296	ENSDART00000112930.3	89.47	0.015	44.1
on.mrna.LG1.627.1	m.2054	ENSDART00000159405.1	100	0.033	42.1
on.mrna.LG1.627.2	m.2060	ENSDART00000159405.1	100	0.035	42.1
on.mrna.LG1.628.1	m.5613	ENSDART00000000005.6	100	0.11	40.1
on.mrna.LG1.628.2	m.5605	ENSDART00000138669.2	97.44	1e-10	69.9
on.mrna.LG1.628.3	m.5609	ENSDART00000000005.6	100	0.11	40.1
on.mrna.LG1.628.4	m.5615	ENSDART00000000005.6	100	0.11	40.1
on.mrna.LG1.628.5	m.5614	ENSDART00000138669.2	97.44	1e-10	69.9
on.mrna.LG1.628.6	m.5606	ENSDART00000000005.6	100	0.12	40.1
on.mrna.LG1.628.7	m.5610	ENSDART00000138669.2	97.44	1e-10	69.9
on.mrna.LG1.629.1	m.4675	ENSDART00000010046.7	82.03	3e-11	71.9
on.mrna.LG1.629.2	m.4674	ENSDART00000010046.7	82.03	3e-11	71.9
on.mrna.LG1.63.1	m.2185	ENSDART00000052404.5	80.19	4e-96	353
on.mrna.LG1.630.1	m.2433	ENSDART00000075782.6	78.37	6e-89	329
on.mrna.LG1.630.2	m.2431	ENSDART00000075782.6	78.95	1e-80	301
on.mrna.LG1.630.3	m.2430	ENSDART00000075782.6	78.76	1e-83	311
on.mrna.LG1.631.1	m.3281	ENSDART00000016265.7	80.35	5e-29	131
on.mrna.LG1.631.2	m.3285	ENSDART00000016265.7	80.35	5e-29	131
on.mrna.LG1.631.3	m.3277	ENSDART00000016265.7	80.35	5e-29	131
on.mrna.LG1.632.1	m.3880	ENSDART00000092351.5	89.66	5e-10	67.9
on.mrna.LG1.632.2	m.3891	ENSDART00000092351.5	89.66	4e-10	67.9
on.mrna.LG1.632.3	m.3887	ENSDART00000092351.5	89.66	3e-10	67.9
on.mrna.LG1.632.4	m.3876	ENSDART00000097574.3	100	0.82	36.2
on.mrna.LG1.633.1	m.829	ENSDART00000110907.4	81.23	2e-40	168
on.mrna.LG1.634.1	m.1728	ENSDART00000112543.3	79.89	0	825
on.mrna.LG1.634.2	m.1719	ENSDART00000112543.3	79.51	0	1080
on.mrna.LG1.634.3	m.1723	ENSDART00000112543.3	79.76	0	779
on.mrna.LG1.634.4	m.1715	ENSDART00000112543.3	79.41	0	1035
on.mrna.LG1.635.1	m.5023	ENSDART00000004120.10	80.73	8e-180	632
on.mrna.LG1.636.1	m.5906	ENSDART00000077840.5	100	5.1	32.2
on.mrna.LG1.638.1	m.5003	ENSDART00000002279.7	92.86	0.079	40.1
on.mrna.LG1.638.2	m.4982	ENSDART00000002279.7	92.86	0.13	40.1
on.mrna.LG1.638.3	m.4996	ENSDART00000002279.7	92.86	0.13	40.1
on.mrna.LG1.638.4	m.4989	ENSDART00000002279.7	92.86	0.13	40.1
on.mrna.LG1.639.1	m.2834	ENSDART00000016294.7	100	0.62	36.2
on.mrna.LG1.639.2	m.2836	ENSDART00000016294.7	100	0.62	36.2
on.mrna.LG1.639.3	m.2833	ENSDART00000016294.7	100	0.5	36.2
on.mrna.LG1.640.1	m.4950	ENSDART00000012234.7	80.34	6e-42	172
on.mrna.LG1.640.2	m.4951	ENSDART00000012234.7	79.92	2e-19	97.6
on.mrna.LG1.641.1	m.39	ENSDART00000074678.4	100	0.11	40.1
on.mrna.LG1.641.2	m.40	ENSDART00000074678.4	100	0.083	40.1
on.mrna.LG1.641.3	m.38	ENSDART00000022008.6	100	1.5	36.2
on.mrna.LG1.641.4	m.37	ENSDART00000022008.6	100	1.1	36.2
on.mrna.LG1.642.1	m.928	ENSDART00000150148.2	78.77	2e-92	341
on.mrna.LG1.642.2	m.922	ENSDART00000150148.2	78.79	4e-74	280
on.mrna.LG1.642.3	m.920	ENSDART00000150148.2	78.79	4e-74	280
on.mrna.LG1.642.4	m.924	ENSDART00000150148.2	78.77	2e-92	341
on.mrna.LG1.642.5	m.926	ENSDART00000150148.2	78.77	2e-92	341
on.mrna.LG1.644.1	m.2758	ENSDART00000019991.8	88.24	3e-11	71.9
on.mrna.LG1.645.1	m.3309	ENSDART00000173034.1	100	0.007	44.1
on.mrna.LG1.646.1	m.4055	ENSDART00000129926.3	95.65	0.32	38.2
on.mrna.LG1.648.1	m.5862	ENSDART00000114592.3	92.31	5e-06	54
on.mrna.LG1.65.1	m.1187	ENSDART00000045374.7	83.68	0	860
on.mrna.LG1.65.2	m.1189	ENSDART00000045374.7	83.42	0	676
on.mrna.LG1.651.1	m.2424	ENSDART00000022242.9	100	0.49	36.2
on.mrna.LG1.652.1	m.4274	ENSDART00000114592.3	87.18	0.21	38.2
on.mrna.LG1.653.1	m.2447	ENSDART00000020456.6	79.91	4e-72	274
on.mrna.LG1.654.1	m.19	ENSDART00000164657.1	80.16	1e-83	311
on.mrna.LG1.654.2	m.25	ENSDART00000164657.1	79.81	2e-88	327
on.mrna.LG1.654.3	m.31	ENSDART00000164657.1	79.71	6e-82	305
on.mrna.LG1.654.4	m.23	ENSDART00000164657.1	80.06	3e-77	289
on.mrna.LG1.654.5	m.33	ENSDART00000164657.1	79.98	8e-88	325
on.mrna.LG1.654.6	m.29	ENSDART00000164657.1	79.87	2e-81	303
on.mrna.LG1.654.7	m.17	ENSDART00000164657.1	79.5	4e-55	216
on.mrna.LG1.655.1	m.5527	ENSDART00000124075.2	81.93	1e-43	178
on.mrna.LG1.656.1	m.4106	ENSDART00000109511.4	83.12	0.0002	50.1
on.mrna.LG1.656.1	m.4108	ENSDART00000109511.4	83.12	9e-05	50.1
on.mrna.LG1.657.1	m.4081	ENSDART00000109511.4	87.65	8e-14	81.8
on.mrna.LG1.657.1	m.4084	ENSDART00000109511.4	83.87	0.004	44.1
on.mrna.LG1.658.1	m.3513	ENSDART00000114669.4	81.82	7e-31	137
on.mrna.LG1.658.2	m.3511	ENSDART00000114669.4	81.82	7e-31	137
on.mrna.LG1.659.1	m.4159	ENSDART00000098942.4	84.05	6e-60	234
on.mrna.LG1.659.2	m.4161	ENSDART00000098942.4	84.05	6e-60	234
on.mrna.LG1.659.3	m.4163	ENSDART00000098942.4	84.01	3e-58	228
on.mrna.LG1.659.4	m.4157	ENSDART00000098942.4	84.05	6e-60	234
on.mrna.LG1.660.1	m.1016	ENSDART00000105215.2	81.33	2e-19	99.6
on.mrna.LG1.660.2	m.1022	ENSDART00000105215.2	81.33	2e-19	99.6
on.mrna.LG1.661.1	m.5089	ENSDART00000112651.3	81.4	6e-72	276
on.mrna.LG1.661.2	m.5101	ENSDART00000112651.3	81.4	6e-72	276
on.mrna.LG1.661.3	m.5137	ENSDART00000112651.3	81.4	6e-72	276
on.mrna.LG1.661.4	m.5113	ENSDART00000112651.3	81.4	6e-72	276
on.mrna.LG1.661.5	m.5149	ENSDART00000112651.3	81.4	6e-72	276
on.mrna.LG1.661.6	m.5125	ENSDART00000112651.3	81.4	6e-72	276
on.mrna.LG1.663.1	m.3589	ENSDART00000058067.4	94.12	6e-29	129
on.mrna.LG1.665.1	m.224	ENSDART00000123174.3	89.19	4e-15	83.8
on.mrna.LG1.666.1	m.5490	ENSDART00000167690.1	96.15	0.005	44.1
on.mrna.LG1.666.1	m.5491	ENSDART00000167690.1	96.15	0.005	44.1
on.mrna.LG1.667.1	m.1818	ENSDART00000052584.6	80.02	3e-90	335
on.mrna.LG1.668.1	m.2420	ENSDART00000110552.4	79.59	4e-22	107
on.mrna.LG1.669.1	m.5803	ENSDART00000099439.4	100	0.065	38.2
on.mrna.LG1.67.1	m.472	ENSDART00000100569.4	84.91	6e-15	83.8
on.mrna.LG1.671.1	m.5986	ENSDART00000141211.1	83.1	0.0009	46.1
on.mrna.LG1.672.1	m.1240	ENSDART00000128467.2	84.15	3e-08	60
on.mrna.LG1.672.2	m.1239	ENSDART00000128467.2	84.15	2e-08	60
on.mrna.LG1.673.1	m.2588	ENSDART00000103638.5	80.12	9e-109	394
on.mrna.LG1.673.2	m.2590	ENSDART00000103638.5	80.12	8e-109	394
on.mrna.LG1.673.3	m.2587	ENSDART00000103638.5	80.12	8e-109	394
on.mrna.LG1.674.1	m.3192	ENSDART00000170671.1	82.43	1e-58	228
on.mrna.LG1.674.2	m.3195	ENSDART00000170671.1	84.38	2e-54	214
on.mrna.LG1.674.2	m.3196	ENSDART00000170671.1	84.43	4e-55	216
on.mrna.LG1.675.1	m.4095	ENSDART00000128140.2	86.96	1e-15	87.7
on.mrna.LG1.675.2	m.4098	ENSDART00000128140.2	86.96	1e-15	87.7
on.mrna.LG1.675.3	m.4089	ENSDART00000128140.2	86.96	1e-15	87.7
on.mrna.LG1.675.4	m.4092	ENSDART00000128140.2	86.96	1e-15	87.7
on.mrna.LG1.677.1	m.999	ENSDART00000081338.3	84.88	4e-30	135
on.mrna.LG1.677.2	m.993	ENSDART00000081338.3	84.88	3e-30	135
on.mrna.LG1.678.1	m.218	ENSDART00000073447.5	81.18	4e-67	258
on.mrna.LG1.678.2	m.221	ENSDART00000073447.5	81.18	3e-67	258
on.mrna.LG1.679.1	m.2916	ENSDART00000123282.2	90.32	3e-12	75.8
on.mrna.LG1.679.2	m.2935	ENSDART00000123282.2	90.32	3e-12	75.8
on.mrna.LG1.679.3	m.2901	ENSDART00000123282.2	90.32	4e-12	75.8
on.mrna.LG1.679.4	m.2945	ENSDART00000123282.2	90.32	4e-12	75.8
on.mrna.LG1.679.5	m.2926	ENSDART00000123282.2	90.32	4e-12	75.8
on.mrna.LG1.679.6	m.2908	ENSDART00000123282.2	90.32	4e-12	75.8
on.mrna.LG1.68.1	m.2048	ENSDART00000098712.4	79.47	2e-06	54
on.mrna.LG1.680.1	m.3736	ENSDART00000052365.6	85.58	1e-44	180
on.mrna.LG1.680.2	m.3734	ENSDART00000052365.6	85.58	1e-44	180
on.mrna.LG1.681.1	m.3074	ENSDART00000052366.5	81.5	3e-25	117
on.mrna.LG1.6810001.1	m.5638	ENSDART00000052366.5	83.51	4e-10	65.9
on.mrna.LG1.682.1	m.3868	ENSDART00000009386.10	81.63	2e-31	139
on.mrna.LG1.682.2	m.3866	ENSDART00000009386.10	81.63	2e-31	139
on.mrna.LG1.682.3	m.3870	ENSDART00000009386.10	85	2e-13	79.8
on.mrna.LG1.684.1	m.406	ENSDART00000104110.4	100	9.2	34.2
on.mrna.LG1.684.1	m.407	ENSDART00000104110.4	100	9.2	34.2
on.mrna.LG1.685.1	m.4848	ENSDART00000122009.2	78.19	9e-64	246
on.mrna.LG1.685.2	m.4853	ENSDART00000122009.2	78.19	1e-63	246
on.mrna.LG1.685.3	m.4858	ENSDART00000122009.2	83.33	7e-84	313
on.mrna.LG1.685.4	m.4844	ENSDART00000122009.2	83.33	7e-84	313
on.mrna.LG1.685.5	m.4843	ENSDART00000122009.2	83.33	5e-84	313
on.mrna.LG1.686.1	m.3902	ENSDART00000027115.8	85.71	9e-08	60
on.mrna.LG1.686.2	m.3906	ENSDART00000027115.8	85.71	8e-08	60
on.mrna.LG1.686.3	m.3898	ENSDART00000027115.8	85.71	6e-08	60
on.mrna.LG1.687.1	m.3325	ENSDART00000013150.6	78.16	1e-59	232
on.mrna.LG1.688.1	m.2556	ENSDART00000014632.9	82.02	2e-19	99.6
on.mrna.LG1.689.1	m.3361	ENSDART00000102260.5	100	0.38	36.2
on.mrna.LG1.69.1	m.4833	ENSDART00000005750.5	84.25	1e-138	494
on.mrna.LG1.690.1	m.1324	ENSDART00000077251.5	81.87	0	747
on.mrna.LG1.690.10	m.1364	ENSDART00000077251.5	81.87	0	747
on.mrna.LG1.690.11	m.1302	ENSDART00000145288.1	82.22	0	731
on.mrna.LG1.690.12	m.1319	ENSDART00000145288.1	82.22	0	731
on.mrna.LG1.690.13	m.1342	ENSDART00000077251.5	81.87	0	747
on.mrna.LG1.690.14	m.1368	ENSDART00000077251.5	81.87	0	747
on.mrna.LG1.690.15	m.1282	ENSDART00000145288.1	82.22	0	731
on.mrna.LG1.690.16	m.1300	ENSDART00000077251.5	81.87	0	747
on.mrna.LG1.690.17	m.1340	ENSDART00000077251.5	81.87	0	747
on.mrna.LG1.690.18	m.1345	ENSDART00000145288.1	82.22	0	731
on.mrna.LG1.690.19	m.1293	ENSDART00000145288.1	82.22	0	731
on.mrna.LG1.690.2	m.1353	ENSDART00000145288.1	82.22	0	731
on.mrna.LG1.690.20	m.1338	ENSDART00000077251.5	81.87	0	747
on.mrna.LG1.690.21	m.1336	ENSDART00000077251.5	81.87	0	747
on.mrna.LG1.690.22	m.1347	ENSDART00000145288.1	82.22	0	731
on.mrna.LG1.690.23	m.1298	ENSDART00000145288.1	82.22	0	731
on.mrna.LG1.690.24	m.1333	ENSDART00000077251.5	81.87	0	747
on.mrna.LG1.690.25	m.1311	ENSDART00000077251.5	81.87	0	747
on.mrna.LG1.690.26	m.1322	ENSDART00000145288.1	82.22	0	731
on.mrna.LG1.690.27	m.1291	ENSDART00000077251.5	81.87	0	747
on.mrna.LG1.690.28	m.1306	ENSDART00000145288.1	82.22	0	731
on.mrna.LG1.690.29	m.1330	ENSDART00000145288.1	82.22	0	731
on.mrna.LG1.690.3	m.1286	ENSDART00000145288.1	82.22	0	731
on.mrna.LG1.690.30	m.1287	ENSDART00000077251.5	81.87	0	747
on.mrna.LG1.690.31	m.1284	ENSDART00000077251.5	81.87	0	747
on.mrna.LG1.690.32	m.1295	ENSDART00000145288.1	82.22	0	731
on.mrna.LG1.690.33	m.1350	ENSDART00000077251.5	81.87	0	747
on.mrna.LG1.690.34	m.1354	ENSDART00000145288.1	82.22	0	731
on.mrna.LG1.690.35	m.1325	ENSDART00000145288.1	82.22	0	731
on.mrna.LG1.690.36	m.1317	ENSDART00000145288.1	82.22	0	731
on.mrna.LG1.690.37	m.1315	ENSDART00000077251.5	81.87	0	747
on.mrna.LG1.690.38	m.1328	ENSDART00000077251.5	81.87	0	747
on.mrna.LG1.690.39	m.1357	ENSDART00000145288.1	82.22	0	731
on.mrna.LG1.690.4	m.1313	ENSDART00000077251.5	81.87	0	747
on.mrna.LG1.690.40	m.1360	ENSDART00000145288.1	82.22	0	731
on.mrna.LG1.690.41	m.1304	ENSDART00000077251.5	81.87	0	747
on.mrna.LG1.690.42	m.1308	ENSDART00000077251.5	81.87	0	747
on.mrna.LG1.690.43	m.1362	ENSDART00000145288.1	82.22	0	731
on.mrna.LG1.690.44	m.1366	ENSDART00000077251.5	81.87	0	747
on.mrna.LG1.690.5	m.1327	ENSDART00000077251.5	81.87	0	747
on.mrna.LG1.690.6	m.1314	ENSDART00000145288.1	82.22	0	731
on.mrna.LG1.690.7	m.1290	ENSDART00000145288.1	82.22	0	731
on.mrna.LG1.690.8	m.1352	ENSDART00000077251.5	81.87	0	747
on.mrna.LG1.690.9	m.1297	ENSDART00000077251.5	81.87	0	747
on.mrna.LG1.692.1	m.5362	ENSDART00000011967.6	81.4	3e-53	210
on.mrna.LG1.692.10	m.5353	ENSDART00000011967.6	82.07	1e-32	141
on.mrna.LG1.692.2	m.5360	ENSDART00000011967.6	81.4	3e-53	210
on.mrna.LG1.692.3	m.5351	ENSDART00000011967.6	81.5	4e-21	103
on.mrna.LG1.692.4	m.5354	ENSDART00000011967.6	81.5	4e-21	103
on.mrna.LG1.692.5	m.5358	ENSDART00000011967.6	82.07	2e-32	141
on.mrna.LG1.692.6	m.5359	ENSDART00000011967.6	82.07	2e-32	141
on.mrna.LG1.692.7	m.5366	ENSDART00000011967.6	81.5	4e-21	103
on.mrna.LG1.692.8	m.5356	ENSDART00000011967.6	81.5	4e-21	103
on.mrna.LG1.692.9	m.5364	ENSDART00000011967.6	81.4	2e-53	210
on.mrna.LG1.694.1	m.3035	ENSDART00000075757.3	84.94	3e-47	188
on.mrna.LG1.694.2	m.3034	ENSDART00000075757.3	84.94	4e-47	188
on.mrna.LG1.695.1	m.493	ENSDART00000136059.2	86.09	2e-20	101
on.mrna.LG1.695.2	m.505	ENSDART00000136059.2	95.56	4e-12	73.8
on.mrna.LG1.695.3	m.497	ENSDART00000136059.2	86.09	2e-20	101
on.mrna.LG1.695.4	m.489	ENSDART00000136059.2	86.09	2e-20	101
on.mrna.LG1.695.5	m.501	ENSDART00000136059.2	95.56	4e-12	73.8
on.mrna.LG1.695.6	m.485	ENSDART00000136059.2	95.56	3e-12	73.8
on.mrna.LG1.696.1	m.1542	ENSDART00000093004.4	100	0.0005	46.1
on.mrna.LG1.696.2	m.1540	ENSDART00000093004.4	100	0.0005	46.1
on.mrna.LG1.696.3	m.1541	ENSDART00000093004.4	100	0.0003	46.1
on.mrna.LG1.698.1	m.864	ENSDART00000162614.1	100	0.36	36.2
on.mrna.LG1.699.1	m.3184	ENSDART00000043776.5	100	0.063	38.2
on.mrna.LG1.7.1	m.299	ENSDART00000162653.1	82.7	2e-23	113
on.mrna.LG1.70.1	m.1942	ENSDART00000067332.3	83.89	2e-74	281
on.mrna.LG1.700.1	m.2859	ENSDART00000064509.6	93.55	0.0004	46.1
on.mrna.LG1.700.2	m.2855	ENSDART00000064509.6	93.55	0.0004	46.1
on.mrna.LG1.700.3	m.2848	ENSDART00000048375.6	83.87	0.001	44.1
on.mrna.LG1.700.4	m.2852	ENSDART00000064509.6	93.55	0.0006	46.1
on.mrna.LG1.701.1	m.2118	ENSDART00000139918.1	81.57	5e-98	359
on.mrna.LG1.701.2	m.2116	ENSDART00000139918.1	83.19	2e-78	293
on.mrna.LG1.702.1	m.46	ENSDART00000082127.5	100	0.24	38.2
on.mrna.LG1.703.2	m.3044	ENSDART00000157833.1	100	0.44	36.2
on.mrna.LG1.704.1	m.1429	ENSDART00000139598.3	100	0.19	38.2
on.mrna.LG1.704.2	m.1435	ENSDART00000139598.3	100	0.19	38.2
on.mrna.LG1.704.3	m.1433	ENSDART00000139598.3	100	0.19	38.2
on.mrna.LG1.704.4	m.1431	ENSDART00000139598.3	100	0.19	38.2
on.mrna.LG1.705.1	m.4944	ENSDART00000039485.6	82.42	6e-52	204
on.mrna.LG1.7050001.1	m.2678	ENSDART00000101191.4	100	0.019	40.1
on.mrna.LG1.7050001.2	m.2680	ENSDART00000101191.4	100	0.019	40.1
on.mrna.LG1.706.1	m.4660	ENSDART00000164975.1	100	0.067	38.2
on.mrna.LG1.707.1	m.5573	ENSDART00000156334.1	100	0.33	36.2
on.mrna.LG1.707.2	m.5570	ENSDART00000085216.5	100	0.008	42.1
on.mrna.LG1.708.1	m.3508	ENSDART00000165177.1	100	1.2	34.2
on.mrna.LG1.709.1	m.4036	ENSDART00000073600.4	80.88	6e-09	63.9
on.mrna.LG1.71.1	m.3721	ENSDART00000035067.7	78.77	4e-96	353
on.mrna.LG1.71.2	m.3720	ENSDART00000035067.7	78.77	4e-96	353
on.mrna.LG1.710.1	m.1279	ENSDART00000008807.7	83.48	3e-82	305
on.mrna.LG1.710.2	m.1273	ENSDART00000008807.7	84.07	9e-98	357
on.mrna.LG1.710.3	m.1276	ENSDART00000008807.7	83.48	3e-82	305
on.mrna.LG1.714.1	m.3815	ENSDART00000127963.2	100	0.16	38.2
on.mrna.LG1.715.1	m.3664	ENSDART00000101537.4	82.55	3e-104	381
on.mrna.LG1.716.1	m.2973	ENSDART00000113905.3	81.84	3e-71	272
on.mrna.LG1.716.1	m.2974	ENSDART00000113905.3	81.84	1e-71	272
on.mrna.LG1.716.2	m.2966	ENSDART00000113905.3	81.84	2e-71	272
on.mrna.LG1.716.2	m.2967	ENSDART00000113905.3	81.84	1e-71	272
on.mrna.LG1.716.3	m.2977	ENSDART00000113905.3	81.84	1e-71	272
on.mrna.LG1.716.3	m.2978	ENSDART00000113905.3	81.84	1e-71	272
on.mrna.LG1.716.4	m.2970	ENSDART00000113905.3	81.84	1e-71	272
on.mrna.LG1.716.4	m.2971	ENSDART00000113905.3	81.84	1e-71	272
on.mrna.LG1.716.5	m.2962	ENSDART00000113905.3	81.84	1e-71	272
on.mrna.LG1.716.5	m.2963	ENSDART00000113905.3	81.84	1e-71	272
on.mrna.LG1.717.1	m.1997	ENSDART00000109698.3	100	0.26	36.2
on.mrna.LG1.718.1	m.5306	ENSDART00000052750.6	89.13	4e-06	52
on.mrna.LG1.7180001.1	m.2073	ENSDART00000052750.6	81.05	0.0004	46.1
on.mrna.LG1.719.1	m.5022	ENSDART00000052750.6	82.76	1e-06	54
on.mrna.LG1.72.1	m.3631	ENSDART00000109705.3	100	0.25	36.2
on.mrna.LG1.720.1	m.1454	ENSDART00000024919.8	93.02	3e-08	61.9
on.mrna.LG1.720.10	m.1447	ENSDART00000024919.8	93.02	2e-08	61.9
on.mrna.LG1.720.11	m.1469	ENSDART00000024919.8	93.02	3e-08	61.9
on.mrna.LG1.720.12	m.1463	ENSDART00000024919.8	93.02	3e-08	61.9
on.mrna.LG1.720.13	m.1449	ENSDART00000024919.8	93.02	3e-08	61.9
on.mrna.LG1.720.2	m.1437	ENSDART00000024919.8	93.02	3e-08	61.9
on.mrna.LG1.720.3	m.1471	ENSDART00000024919.8	93.02	3e-08	61.9
on.mrna.LG1.720.4	m.1466	ENSDART00000024919.8	93.02	3e-08	61.9
on.mrna.LG1.720.5	m.1441	ENSDART00000024919.8	93.02	3e-08	61.9
on.mrna.LG1.720.6	m.1451	ENSDART00000024919.8	93.02	2e-08	61.9
on.mrna.LG1.720.7	m.1458	ENSDART00000024919.8	93.02	3e-08	61.9
on.mrna.LG1.720.8	m.1445	ENSDART00000024919.8	93.02	3e-08	61.9
on.mrna.LG1.720.9	m.1460	ENSDART00000024919.8	93.02	2e-08	61.9
on.mrna.LG1.721.1	m.2513	ENSDART00000092389.5	95.45	0.64	36.2
on.mrna.LG1.721.2	m.2517	ENSDART00000092389.5	95.45	0.64	36.2
on.mrna.LG1.723.1	m.2140	ENSDART00000023301.8	80.07	3e-26	119
on.mrna.LG1.724.1	m.4588	ENSDART00000163274.1	84.31	9e-96	353
on.mrna.LG1.724.2	m.4575	ENSDART00000163274.1	86	2e-81	305
on.mrna.LG1.724.3	m.4582	ENSDART00000163274.1	84.5	2e-99	365
on.mrna.LG1.724.4	m.4569	ENSDART00000163274.1	84.31	9e-96	353
on.mrna.LG1.726.1	m.527	ENSDART00000168136.1	88.39	9e-40	165
on.mrna.LG1.727.1	m.1552	ENSDART00000131059.2	82.05	0	706
on.mrna.LG1.727.2	m.1550	ENSDART00000131059.2	81.94	9e-177	620
on.mrna.LG1.727.3	m.1554	ENSDART00000081335.6	82.15	4e-138	492
on.mrna.LG1.728.1	m.1833	ENSDART00000103449.4	82.33	1e-123	444
on.mrna.LG1.728.1	m.1834	ENSDART00000103449.4	82.33	1e-123	444
on.mrna.LG1.728.2	m.1839	ENSDART00000103449.4	82.41	1e-126	454
on.mrna.LG1.728.2	m.1840	ENSDART00000103449.4	82.41	1e-126	454
on.mrna.LG1.728.3	m.1842	ENSDART00000103449.4	82.41	1e-126	454
on.mrna.LG1.728.3	m.1843	ENSDART00000103449.4	82.41	1e-126	454
on.mrna.LG1.728.4	m.1836	ENSDART00000103449.4	82.41	1e-126	454
on.mrna.LG1.728.4	m.1837	ENSDART00000103449.4	82.41	1e-126	454
on.mrna.LG1.7280001.1	m.643	ENSDART00000011324.8	80.65	2e-15	83.8
on.mrna.LG1.729.1	m.2429	ENSDART00000077386.5	100	0.32	36.2
on.mrna.LG1.73.1	m.340	ENSDART00000015884.8	80.49	5e-43	176
on.mrna.LG1.730.1	m.3693	ENSDART00000113998.4	85.87	0	634
on.mrna.LG1.730.2	m.3691	ENSDART00000113998.4	85.87	0	634
on.mrna.LG1.731.1	m.4053	ENSDART00000157410.1	80.92	1e-14	81.8
on.mrna.LG1.731.2	m.4050	ENSDART00000169614.1	83.45	4e-18	93.7
on.mrna.LG1.731.3	m.4052	ENSDART00000157410.1	80.92	9e-15	81.8
on.mrna.LG1.732.1	m.2422	ENSDART00000169614.1	78.55	4e-25	117
on.mrna.LG1.734.1	m.804	ENSDART00000170637.1	79.36	2e-12	75.8
on.mrna.LG1.734.2	m.799	ENSDART00000170637.1	90.91	9e-15	83.8
on.mrna.LG1.734.3	m.802	ENSDART00000170637.1	90.91	8e-15	83.8
on.mrna.LG1.735.1	m.919	ENSDART00000145111.2	96	0.005	42.1
on.mrna.LG1.737.1	m.520	ENSDART00000055292.5	100	0.12	38.2
on.mrna.LG1.7370001.1	m.2697	ENSDART00000170253.1	86.76	3e-09	63.9
on.mrna.LG1.738.1	m.5243	ENSDART00000113744.4	86.67	1e-10	69.9
on.mrna.LG1.739.1	m.5229	ENSDART00000052383.6	89.77	3e-21	103
on.mrna.LG1.7390002.1	m.5066	ENSDART00000101633.4	100	0.08	38.2
on.mrna.LG1.74.1	m.5496	ENSDART00000005724.8	88.46	1e-06	56
on.mrna.LG1.740.1	m.1263	ENSDART00000076469.4	80.93	7e-158	559
on.mrna.LG1.740.2	m.1264	ENSDART00000076469.4	80.93	6e-158	559
on.mrna.LG1.740.3	m.1265	ENSDART00000076469.4	80.93	6e-158	559
on.mrna.LG1.741.1	m.2414	ENSDART00000112414.3	100	1.3	34.2
on.mrna.LG1.741.2	m.2417	ENSDART00000112414.3	100	1.3	34.2
on.mrna.LG1.741.3	m.2411	ENSDART00000112414.3	100	1.3	34.2
on.mrna.LG1.743.1	m.5350	ENSDART00000109579.3	95.83	0.023	40.1
on.mrna.LG1.743.2	m.5349	ENSDART00000109579.3	95.83	0.023	40.1
on.mrna.LG1.743.3	m.5348	ENSDART00000109579.3	95.83	0.023	40.1
on.mrna.LG1.744.1	m.3150	ENSDART00000159700.2	89.36	2e-06	54
on.mrna.LG1.744.2	m.3149	ENSDART00000159700.2	89.36	2e-06	54
on.mrna.LG1.745.1	m.5167	ENSDART00000162583.1	85	8e-19	95.6
on.mrna.LG1.745.2	m.5169	ENSDART00000162583.1	85	8e-19	95.6
on.mrna.LG1.745.3	m.5171	ENSDART00000162583.1	85	7e-19	95.6
on.mrna.LG1.745.4	m.5168	ENSDART00000162583.1	85	7e-19	95.6
on.mrna.LG1.745.5	m.5172	ENSDART00000162583.1	85	9e-19	95.6
on.mrna.LG1.745.6	m.5170	ENSDART00000162583.1	85	8e-19	95.6
on.mrna.LG1.746.1	m.2741	ENSDART00000163991.2	79.21	3e-10	67.9
on.mrna.LG1.747.1	m.2260	ENSDART00000167149.1	79.56	5e-52	208
on.mrna.LG1.7480001.1	m.5060	ENSDART00000166565.2	87.06	8e-15	81.8
on.mrna.LG1.749.1	m.1544	ENSDART00000049701.2	90.57	8e-10	65.9
on.mrna.LG1.75.1	m.2050	ENSDART00000167035.1	85.71	9e-46	184
on.mrna.LG1.75.2	m.2052	ENSDART00000167035.1	84.27	8e-30	131
on.mrna.LG1.75.3	m.2053	ENSDART00000167035.1	84.27	1e-29	131
on.mrna.LG1.75.4	m.2051	ENSDART00000167035.1	84.27	8e-30	131
on.mrna.LG1.75.5	m.2049	ENSDART00000167035.1	84.27	8e-30	131
on.mrna.LG1.750.1	m.5018	ENSDART00000078480.4	100	3.7	34.2
on.mrna.LG1.752.1	m.161	ENSDART00000090743.5	80.76	0	928
on.mrna.LG1.752.2	m.177	ENSDART00000090743.5	80.76	0	928
on.mrna.LG1.752.3	m.167	ENSDART00000090743.5	80.76	0	928
on.mrna.LG1.752.4	m.173	ENSDART00000090743.5	80.73	0	1007
on.mrna.LG1.753.1	m.1706	ENSDART00000097460.4	79.04	1e-17	93.7
on.mrna.LG1.753.2	m.1700	ENSDART00000097460.4	79.29	7e-50	200
on.mrna.LG1.7530001.1	m.193	ENSDART00000115057.3	92.59	0.14	38.2
on.mrna.LG1.76.1	m.1254	ENSDART00000063024.4	89.74	0.0005	46.1
on.mrna.LG1.76.2	m.1251	ENSDART00000063024.4	89.74	0.0005	46.1
on.mrna.LG1.76.3	m.1253	ENSDART00000063024.4	89.74	0.0003	46.1
on.mrna.LG1.76.4	m.1247	ENSDART00000063024.4	89.74	0.0005	46.1
on.mrna.LG1.76.5	m.1249	ENSDART00000063024.4	89.74	0.0005	46.1
on.mrna.LG1.77.1	m.3397	ENSDART00000166497.1	93.1	0.018	42.1
on.mrna.LG1.77.2	m.3395	ENSDART00000166497.1	93.1	0.018	42.1
on.mrna.LG1.77.3	m.3396	ENSDART00000166497.1	93.1	0.018	42.1
on.mrna.LG1.77.4	m.3398	ENSDART00000166497.1	93.1	0.018	42.1
on.mrna.LG1.78.1	m.5828	ENSDART00000129459.2	87.5	2e-06	56
on.mrna.LG1.78.2	m.5830	ENSDART00000129459.2	84.13	0.002	46.1
on.mrna.LG1.78.3	m.5824	ENSDART00000129459.2	87.5	2e-06	56
on.mrna.LG1.78.4	m.5826	ENSDART00000129459.2	87.5	2e-06	56
on.mrna.LG1.79.1	m.2691	ENSDART00000136189.1	79.39	4e-92	341
on.mrna.LG1.79.2	m.2689	ENSDART00000136189.1	79.39	4e-92	341
on.mrna.LG1.79.3	m.2684	ENSDART00000136189.1	79.39	4e-92	341
on.mrna.LG1.79.4	m.2686	ENSDART00000136189.1	79.39	3e-92	341
on.mrna.LG1.79.5	m.2682	ENSDART00000136189.1	79.39	4e-92	341
on.mrna.LG1.79.6	m.2687	ENSDART00000136189.1	79.39	4e-92	341
on.mrna.LG1.79.7	m.2693	ENSDART00000136189.1	79.39	3e-92	341
on.mrna.LG1.8.1	m.1802	ENSDART00000109635.2	77.71	7e-12	71.9
on.mrna.LG1.80.1	m.4348	ENSDART00000082496.3	86	0.002	44.1
on.mrna.LG1.80.2	m.4347	ENSDART00000082496.3	79.88	4e-09	63.9
on.mrna.LG1.80.3	m.4346	ENSDART00000082496.3	79.88	4e-09	63.9
on.mrna.LG1.81.1	m.3594	ENSDART00000148892.1	100	0.002	44.1
on.mrna.LG1.81.2	m.3593	ENSDART00000148892.1	100	0.002	44.1
on.mrna.LG1.82.1	m.4687	ENSDART00000006124.7	82.9	0	813
on.mrna.LG1.83.1	m.2674	ENSDART00000161616.1	86.21	5e-05	52
on.mrna.LG1.84.1	m.2715	ENSDART00000162222.1	84.13	0.001	46.1
on.mrna.LG1.84.2	m.2713	ENSDART00000162222.1	84.13	0.001	46.1
on.mrna.LG1.84.3	m.2714	ENSDART00000162222.1	84.13	0.002	46.1
on.mrna.LG1.84.4	m.2712	ENSDART00000162222.1	84.13	0.002	46.1
on.mrna.LG1.85.1	m.1511	ENSDART00000173057.1	78.88	7e-108	394
on.mrna.LG1.85.2	m.1519	ENSDART00000173057.1	78.88	7e-108	394
on.mrna.LG1.86.1	m.422	ENSDART00000172505.1	81.15	4e-08	60
on.mrna.LG1.86.2	m.420	ENSDART00000172505.1	81.15	3e-08	60
on.mrna.LG1.86.3	m.421	ENSDART00000172505.1	81.15	3e-08	60
on.mrna.LG1.87.1	m.5380	ENSDART00000165073.1	84.51	1e-05	54
on.mrna.LG1.87.2	m.5375	ENSDART00000165073.1	84.51	1e-05	54
on.mrna.LG1.88.1	m.4680	ENSDART00000082504.6	88	6e-61	236
on.mrna.LG1.88.2	m.4683	ENSDART00000082504.6	88	7e-61	236
on.mrna.LG1.89.1	m.3719	ENSDART00000021462.5	84.29	8e-06	52
on.mrna.LG1.9.1	m.4220	ENSDART00000109872.2	80.53	5e-45	182
on.mrna.LG1.90.1	m.3488	ENSDART00000049171.6	80.14	1e-147	525
on.mrna.LG1.90.2	m.3490	ENSDART00000049171.6	80.14	1e-147	525
on.mrna.LG1.90.3	m.3494	ENSDART00000049171.6	80.14	1e-147	525
on.mrna.LG1.90.4	m.3496	ENSDART00000049171.6	80.14	1e-147	525
on.mrna.LG1.90.5	m.3492	ENSDART00000049171.6	80.14	1e-147	525
on.mrna.LG1.91.1	m.1773	ENSDART00000149158.2	80.47	0	747
on.mrna.LG1.91.2	m.1763	ENSDART00000129387.2	79.69	0	664
on.mrna.LG1.91.3	m.1768	ENSDART00000129387.2	79.69	0	664
on.mrna.LG1.91.4	m.1778	ENSDART00000149158.2	80.47	0	747
on.mrna.LG1.92.1	m.2363	ENSDART00000087960.5	82.2	4e-10	67.9
on.mrna.LG1.94.1	m.2047	ENSDART00000125116.1	81.51	1e-72	274
on.mrna.LG1.96.1	m.5692	ENSDART00000122930.2	79.37	2e-42	174
on.mrna.LG1.96.2	m.5694	ENSDART00000122930.2	79.37	2e-42	174
on.mrna.LG1.97.1	m.3320	ENSDART00000127955.3	82.59	8e-31	135
on.mrna.LG1.98.1	m.3964	ENSDART00000012164.9	80.14	3e-41	170
on.mrna.LG1.98.2	m.3959	ENSDART00000012164.9	80.14	3e-41	170
on.mrna.LG1.98.3	m.3966	ENSDART00000012164.9	80.18	1e-43	178
on.mrna.LG1.98.4	m.3956	ENSDART00000012164.9	80.18	9e-44	178
on.mrna.LG1.98.5	m.3950	ENSDART00000012164.9	80.14	2e-41	170
on.mrna.LG1.98.6	m.3953	ENSDART00000012164.9	80.14	2e-41	170
on.mrna.LG1.98.7	m.3961	ENSDART00000012164.9	80.18	7e-44	178
on.mrna.LG1.99.1	m.1902	ENSDART00000077694.3	80.56	5e-127	456
on.mrna.LG1.99.2	m.1899	ENSDART00000077694.3	81.18	3e-125	450
on.mrna.LG1.99.3	m.1895	ENSDART00000077694.3	81.21	3e-85	317
on.mrna.LG10.100.1	m.9197	ENSDART00000153909.2	78.74	5e-116	420
on.mrna.LG10.101.1	m.8814	ENSDART00000078018.4	81.07	0	664
on.mrna.LG10.101.2	m.8807	ENSDART00000078018.4	81.08	0	652
on.mrna.LG10.101.3	m.8811	ENSDART00000078018.4	81.07	0	664
on.mrna.LG10.102.1	m.8395	ENSDART00000098239.4	80.61	2e-104	381
on.mrna.LG10.102.2	m.8393	ENSDART00000098239.4	80.61	2e-104	381
on.mrna.LG10.102.3	m.8396	ENSDART00000098239.4	80.61	2e-104	381
[truncated: 48,661 more rows]

## Sheet: Sd_Drerio
Onil_transcripID	denovo_trancriptID_QUERY	Drerio_transcriptID_SUBJECT	percentID	eval	bit_score
on.mrna.LG1.1.1	m.3215	ENSDART00000008785.8	82.57	3e-77	289
on.mrna.LG1.1.2	m.3217	ENSDART00000008785.8	84.52	6e-64	244
on.mrna.LG1.10.1	m.3183	ENSDART00000166391.1	82.25	4e-19	97.6
on.mrna.LG1.100.1	m.210	ENSDART00000029549.8	79.49	8e-108	392
on.mrna.LG1.100.2	m.216	ENSDART00000029549.8	79.49	8e-108	392
on.mrna.LG1.100.3	m.207	ENSDART00000029549.8	79.49	8e-108	392
on.mrna.LG1.100.4	m.213	ENSDART00000029549.8	79.49	8e-108	392
on.mrna.LG1.101.1	m.3489	ENSDART00000041070.7	100	2	36.2
on.mrna.LG1.102.1	m.2875	ENSDART00000151550.1	84.39	3e-28	129
on.mrna.LG1.102.2	m.2869	ENSDART00000151550.1	84.39	3e-28	129
on.mrna.LG1.102.3	m.2881	ENSDART00000151550.1	84.39	3e-28	129
on.mrna.LG1.102.4	m.2863	ENSDART00000151550.1	84.39	3e-28	129
on.mrna.LG1.103.1	m.4578	ENSDART00000149321.1	80.85	1e-11	71.9
on.mrna.LG1.104.1	m.3804	ENSDART00000121864.2	88.1	5e-16	87.7
on.mrna.LG1.105.1	m.219	ENSDART00000052641.5	79.18	6e-95	349
on.mrna.LG1.106.1	m.5573	ENSDART00000129125.2	79.26	4e-86	321
on.mrna.LG1.108.1	m.2196	ENSDART00000040798.6	100	0.031	40.1
on.mrna.LG1.108.2	m.2175	ENSDART00000040798.6	100	0.031	40.1
on.mrna.LG1.108.3	m.2184	ENSDART00000040798.6	100	0.031	40.1
on.mrna.LG1.108.4	m.2178	ENSDART00000040798.6	100	0.029	40.1
on.mrna.LG1.108.5	m.2190	ENSDART00000040798.6	100	0.029	40.1
on.mrna.LG1.108.6	m.2181	ENSDART00000040798.6	100	0.1	40.1
on.mrna.LG1.108.7	m.2187	ENSDART00000040798.6	100	0.1	40.1
on.mrna.LG1.108.8	m.2193	ENSDART00000040798.6	100	0.1	40.1
on.mrna.LG1.109.1	m.3800	ENSDART00000159781.1	81.72	9e-05	50.1
on.mrna.LG1.109.2	m.3792	ENSDART00000159781.1	81.72	0.0001	50.1
on.mrna.LG1.109.3	m.3798	ENSDART00000159781.1	95.83	1e-13	79.8
on.mrna.LG1.109.4	m.3794	ENSDART00000159781.1	95.83	2e-13	79.8
on.mrna.LG1.109.5	m.3796	ENSDART00000159781.1	95.83	9e-14	79.8
on.mrna.LG1.109.6	m.3802	ENSDART00000159781.1	95.83	7e-14	79.8
on.mrna.LG1.11.1	m.3892	ENSDART00000169830.1	81.88	3e-63	244
on.mrna.LG1.11.2	m.3890	ENSDART00000169830.1	81.82	5e-56	220
on.mrna.LG1.110.1	m.3808	ENSDART00000102553.4	86.6	6e-17	89.7
on.mrna.LG1.110.2	m.3807	ENSDART00000102553.4	86.6	7e-17	89.7
on.mrna.LG1.110.3	m.3810	ENSDART00000102553.4	86.6	7e-17	89.7
on.mrna.LG1.110.4	m.3809	ENSDART00000102553.4	86.6	7e-17	89.7
on.mrna.LG1.111.1	m.2921	ENSDART00000159480.1	88.14	2e-08	61.9
on.mrna.LG1.111.2	m.2926	ENSDART00000159480.1	80	4e-16	87.7
on.mrna.LG1.111.3	m.2918	ENSDART00000159480.1	80	4e-16	87.7
on.mrna.LG1.111.4	m.2923	ENSDART00000159480.1	80	4e-16	87.7
on.mrna.LG1.111.5	m.2916	ENSDART00000159480.1	80	4e-16	87.7
on.mrna.LG1.112.1	m.3103	ENSDART00000109970.3	100	0.057	40.1
on.mrna.LG1.112.2	m.3109	ENSDART00000109970.3	100	0.061	40.1
on.mrna.LG1.112.3	m.3100	ENSDART00000109970.3	100	0.057	40.1
on.mrna.LG1.112.4	m.3106	ENSDART00000109970.3	100	0.061	40.1
on.mrna.LG1.113.1	m.1843	ENSDART00000081319.5	85.47	5e-19	97.6
on.mrna.LG1.113.2	m.1847	ENSDART00000081319.5	85.47	5e-19	97.6
on.mrna.LG1.113.3	m.1836	ENSDART00000081319.5	85.47	5e-19	97.6
on.mrna.LG1.113.4	m.1851	ENSDART00000081319.5	85.47	4e-19	97.6
on.mrna.LG1.113.5	m.1833	ENSDART00000081319.5	85.47	4e-19	97.6
on.mrna.LG1.113.6	m.1840	ENSDART00000081319.5	85.47	3e-19	97.6
on.mrna.LG1.114.1	m.2369	ENSDART00000168352.1	91.25	2e-83	309
on.mrna.LG1.115.1	m.857	ENSDART00000003475.5	89.23	6e-12	73.8
on.mrna.LG1.116.1	m.1801	ENSDART00000036050.7	80.98	2e-19	97.6
on.mrna.LG1.116.2	m.1798	ENSDART00000036050.7	80.98	2e-19	97.6
on.mrna.LG1.116.3	m.1804	ENSDART00000036050.7	80.98	2e-19	97.6
on.mrna.LG1.117.1	m.5084	ENSDART00000159727.1	100	0.046	42.1
on.mrna.LG1.117.2	m.5093	ENSDART00000159727.1	100	0.046	42.1
on.mrna.LG1.117.3	m.5102	ENSDART00000159727.1	100	0.039	42.1
on.mrna.LG1.118.1	m.4213	ENSDART00000165019.1	87.18	2e-46	188
on.mrna.LG1.118.2	m.4210	ENSDART00000165019.1	87.18	2e-46	188
on.mrna.LG1.119.1	m.3155	ENSDART00000109567.3	91.67	0.0008	48.1
on.mrna.LG1.119.1	m.3156	ENSDART00000109567.3	91.67	0.0004	48.1
on.mrna.LG1.119.2	m.3149	ENSDART00000109567.3	91.67	0.0005	48.1
on.mrna.LG1.119.2	m.3150	ENSDART00000109567.3	91.67	0.0004	48.1
on.mrna.LG1.119.3	m.3142	ENSDART00000109567.3	91.67	0.0008	48.1
on.mrna.LG1.119.3	m.3143	ENSDART00000109567.3	91.67	0.0004	48.1
on.mrna.LG1.12.1	m.4720	ENSDART00000164643.1	81.52	4e-86	321
on.mrna.LG1.12.2	m.4723	ENSDART00000164643.1	81.52	4e-86	321
on.mrna.LG1.12.3	m.4726	ENSDART00000164643.1	81.52	5e-86	321
on.mrna.LG1.1210001.1	m.3837	ENSDART00000003712.7	84.71	4e-11	71.9
on.mrna.LG1.122.1	m.3942	ENSDART00000129535.3	100	0.047	40.1
on.mrna.LG1.122.2	m.3940	ENSDART00000140476.1	100	0.015	42.1
on.mrna.LG1.123.1	m.5708	ENSDART00000065132.4	100	0.019	42.1
on.mrna.LG1.123.2	m.5712	ENSDART00000065132.4	100	0.021	42.1
on.mrna.LG1.123.3	m.5710	ENSDART00000079175.5	80.14	4e-07	58
on.mrna.LG1.123.4	m.5706	ENSDART00000079175.5	84.15	1e-07	60
on.mrna.LG1.124.1	m.4906	ENSDART00000145251.1	87.27	3e-06	54
on.mrna.LG1.124.2	m.4905	ENSDART00000145251.1	87.27	4e-06	54
on.mrna.LG1.124.3	m.4907	ENSDART00000145251.1	87.27	3e-06	54
on.mrna.LG1.124.4	m.4908	ENSDART00000145251.1	87.27	3e-06	54
on.mrna.LG1.125.1	m.4920	ENSDART00000066558.4	100	4.6	34.2
on.mrna.LG1.126.1	m.1488	ENSDART00000168609.1	82.05	5e-09	65.9
on.mrna.LG1.127.1	m.3091	ENSDART00000026434.7	100	0.051	40.1
on.mrna.LG1.127.10	m.3092	ENSDART00000026434.7	100	0.042	40.1
on.mrna.LG1.127.11	m.3095	ENSDART00000026434.7	100	0.027	40.1
on.mrna.LG1.127.12	m.3089	ENSDART00000026434.7	100	0.037	40.1
on.mrna.LG1.127.13	m.3086	ENSDART00000026434.7	100	0.027	40.1
on.mrna.LG1.127.2	m.3094	ENSDART00000026434.7	100	0.042	40.1
on.mrna.LG1.127.3	m.3090	ENSDART00000026434.7	100	0.046	40.1
on.mrna.LG1.127.4	m.3096	ENSDART00000026434.7	100	0.036	40.1
on.mrna.LG1.127.5	m.3093	ENSDART00000026434.7	100	0.049	40.1
on.mrna.LG1.127.6	m.3088	ENSDART00000026434.7	100	0.036	40.1
on.mrna.LG1.127.7	m.3097	ENSDART00000026434.7	100	0.034	40.1
on.mrna.LG1.127.8	m.3085	ENSDART00000026434.7	100	0.044	40.1
on.mrna.LG1.127.9	m.3087	ENSDART00000026434.7	100	0.034	40.1
on.mrna.LG1.128.1	m.3811	ENSDART00000168428.1	85.94	2e-06	56
on.mrna.LG1.128.2	m.3813	ENSDART00000168428.1	85.94	1e-06	56
on.mrna.LG1.129.1	m.2532	ENSDART00000168091.1	81.01	3e-75	283
on.mrna.LG1.13.1	m.5483	ENSDART00000010322.8	86.49	2e-10	67.9
on.mrna.LG1.13.2	m.5482	ENSDART00000010322.8	86.49	2e-10	67.9
on.mrna.LG1.130.1	m.1925	ENSDART00000109552.2	95.24	2.2	34.2
on.mrna.LG1.132.1	m.306	ENSDART00000082153.5	100	0.046	42.1
on.mrna.LG1.132.2	m.309	ENSDART00000082153.5	100	0.041	42.1
on.mrna.LG1.1320001.1	m.2773	ENSDART00000054925.6	83.52	4e-26	119
on.mrna.LG1.133.1	m.492	ENSDART00000055047.6	81.82	4e-24	113
on.mrna.LG1.133.2	m.493	ENSDART00000055047.6	81.82	4e-24	113
on.mrna.LG1.135.1	m.5607	ENSDART00000022307.9	78.94	3e-100	367
on.mrna.LG1.135.2	m.5605	ENSDART00000022307.9	79.4	6e-64	246
on.mrna.LG1.135.3	m.5609	ENSDART00000022307.9	78.94	2e-100	367
on.mrna.LG1.136.1	m.4533	ENSDART00000010521.7	82.25	1e-47	194
on.mrna.LG1.136.2	m.4549	ENSDART00000010521.7	82.25	1e-47	194
on.mrna.LG1.136.3	m.4527	ENSDART00000010521.7	82.25	1e-47	194
on.mrna.LG1.136.4	m.4555	ENSDART00000010521.7	82.25	1e-47	194
on.mrna.LG1.136.5	m.4541	ENSDART00000010521.7	82.25	1e-47	194
on.mrna.LG1.137.1	m.1913	ENSDART00000091901.5	84.18	5e-90	331
on.mrna.LG1.137.2	m.1912	ENSDART00000091901.5	84.19	1e-131	470
on.mrna.LG1.137.3	m.1914	ENSDART00000091901.5	84.14	0	662
on.mrna.LG1.137.4	m.1910	ENSDART00000091901.5	84.31	1e-175	617
on.mrna.LG1.138.1	m.3763	ENSDART00000169908.1	79.27	2e-29	131
on.mrna.LG1.138.2	m.3762	ENSDART00000169908.1	79.27	2e-29	131
on.mrna.LG1.139.1	m.1699	ENSDART00000065933.5	82.02	2e-19	99.6
on.mrna.LG1.139.2	m.1702	ENSDART00000065933.5	82.02	2e-19	99.6
on.mrna.LG1.14.1	m.4269	ENSDART00000039810.6	83.92	7e-117	424
on.mrna.LG1.140.1	m.3024	ENSDART00000111091.3	91.67	1e-08	63.9
on.mrna.LG1.140.2	m.3045	ENSDART00000111091.3	91.67	2e-08	63.9
on.mrna.LG1.140.3	m.3051	ENSDART00000111091.3	91.67	1e-08	63.9
on.mrna.LG1.140.4	m.3039	ENSDART00000111091.3	91.67	2e-08	63.9
on.mrna.LG1.140.5	m.3033	ENSDART00000111091.3	91.67	2e-08	63.9
on.mrna.LG1.140.6	m.3028	ENSDART00000111091.3	91.67	1e-08	63.9
on.mrna.LG1.141.1	m.4966	ENSDART00000033528.7	100	0.44	38.2
on.mrna.LG1.142.1	m.3948	ENSDART00000026135.8	93.1	0.039	42.1
on.mrna.LG1.142.2	m.3945	ENSDART00000026135.8	93.1	0.039	42.1
on.mrna.LG1.142.3	m.3946	ENSDART00000026135.8	93.1	0.023	42.1
on.mrna.LG1.142.4	m.3944	ENSDART00000026135.8	93.1	0.032	42.1
on.mrna.LG1.142.5	m.3947	ENSDART00000026135.8	93.1	0.026	42.1
on.mrna.LG1.143.1	m.710	ENSDART00000126243.2	77.6	2e-15	85.7
on.mrna.LG1.143.10	m.647	ENSDART00000150989.2	81.94	2e-13	79.8
on.mrna.LG1.143.11	m.695	ENSDART00000126243.2	88.41	1e-11	73.8
on.mrna.LG1.143.12	m.767	ENSDART00000126243.2	88.41	8e-12	73.8
on.mrna.LG1.143.13	m.656	ENSDART00000126243.2	88.41	9e-12	73.8
on.mrna.LG1.143.14	m.722	ENSDART00000150989.2	81.94	1e-13	79.8
on.mrna.LG1.143.15	m.761	ENSDART00000110069.3	96.55	0.0001	50.1
on.mrna.LG1.143.16	m.689	ENSDART00000126243.2	88.41	8e-12	73.8
on.mrna.LG1.143.17	m.749	ENSDART00000110069.3	96.55	0.0001	50.1
on.mrna.LG1.143.18	m.746	ENSDART00000126243.2	88.41	1e-11	73.8
on.mrna.LG1.143.19	m.683	ENSDART00000126243.2	88.41	8e-12	73.8
on.mrna.LG1.143.2	m.740	ENSDART00000126243.2	77.6	2e-15	85.7
on.mrna.LG1.143.20	m.707	ENSDART00000110069.3	96.55	0.0001	50.1
on.mrna.LG1.143.21	m.668	ENSDART00000126243.2	88.41	9e-12	73.8
on.mrna.LG1.143.22	m.728	ENSDART00000110069.3	96.55	0.0001	50.1
on.mrna.LG1.143.23	m.653	ENSDART00000126243.2	88.41	8e-12	73.8
on.mrna.LG1.143.24	m.641	ENSDART00000110069.3	96.55	8e-05	50.1
on.mrna.LG1.143.25	m.716	ENSDART00000110069.3	96.55	8e-05	50.1
on.mrna.LG1.143.26	m.665	ENSDART00000110069.3	96.55	8e-05	50.1
on.mrna.LG1.143.27	m.734	ENSDART00000110069.3	96.55	8e-05	50.1
on.mrna.LG1.143.28	m.743	ENSDART00000126243.2	77.6	2e-15	85.7
on.mrna.LG1.143.29	m.731	ENSDART00000126243.2	81.69	2e-12	75.8
on.mrna.LG1.143.3	m.713	ENSDART00000126243.2	77.6	2e-15	85.7
on.mrna.LG1.143.30	m.674	ENSDART00000126243.2	77.6	2e-15	85.7
on.mrna.LG1.143.31	m.698	ENSDART00000150989.2	77.7	1e-16	89.7
on.mrna.LG1.143.32	m.770	ENSDART00000126243.2	88.41	8e-12	73.8
on.mrna.LG1.143.33	m.779	ENSDART00000126243.2	81.69	2e-12	75.8
on.mrna.LG1.143.34	m.701	ENSDART00000150989.2	81.94	1e-13	79.8
on.mrna.LG1.143.35	m.677	ENSDART00000150989.2	77.7	1e-16	89.7
on.mrna.LG1.143.36	m.737	ENSDART00000126243.2	88.41	8e-12	73.8
on.mrna.LG1.143.37	m.662	ENSDART00000126243.2	88.41	8e-12	73.8
on.mrna.LG1.143.38	m.758	ENSDART00000126243.2	88.41	8e-12	73.8
on.mrna.LG1.143.39	m.644	ENSDART00000150989.2	81.94	1e-13	79.8
on.mrna.LG1.143.4	m.719	ENSDART00000126243.2	81.69	2e-12	75.8
on.mrna.LG1.143.40	m.680	ENSDART00000110069.3	96.55	8e-05	50.1
on.mrna.LG1.143.41	m.704	ENSDART00000126243.2	88.41	8e-12	73.8
on.mrna.LG1.143.42	m.776	ENSDART00000110069.3	96.55	8e-05	50.1
on.mrna.LG1.143.43	m.686	ENSDART00000126243.2	88.41	8e-12	73.8
on.mrna.LG1.143.44	m.692	ENSDART00000126243.2	88.41	8e-12	73.8
on.mrna.LG1.143.45	m.773	ENSDART00000110069.3	96.55	8e-05	50.1
on.mrna.LG1.143.46	m.752	ENSDART00000110069.3	96.55	8e-05	50.1
on.mrna.LG1.143.47	m.635	ENSDART00000110069.3	96.55	8e-05	50.1
on.mrna.LG1.143.48	m.725	ENSDART00000126243.2	88.41	8e-12	73.8
on.mrna.LG1.143.49	m.659	ENSDART00000110069.3	96.55	8e-05	50.1
on.mrna.LG1.143.5	m.650	ENSDART00000150989.2	77.7	2e-16	89.7
on.mrna.LG1.143.50	m.671	ENSDART00000110069.3	96.55	8e-05	50.1
on.mrna.LG1.143.51	m.782	ENSDART00000110069.3	96.55	8e-05	50.1
on.mrna.LG1.143.6	m.638	ENSDART00000126243.2	77.6	2e-15	85.7
on.mrna.LG1.143.7	m.755	ENSDART00000126243.2	88.41	9e-12	73.8
on.mrna.LG1.143.8	m.785	ENSDART00000126243.2	81.69	2e-12	75.8
on.mrna.LG1.143.9	m.764	ENSDART00000150989.2	77.7	1e-16	89.7
on.mrna.LG1.144.1	m.5995	ENSDART00000109552.2	82.66	3e-88	329
on.mrna.LG1.144.2	m.5968	ENSDART00000109552.2	82.66	3e-88	329
on.mrna.LG1.144.3	m.5986	ENSDART00000109552.2	83.62	2e-83	313
on.mrna.LG1.144.4	m.6013	ENSDART00000109552.2	83.41	7e-80	301
on.mrna.LG1.144.5	m.6004	ENSDART00000109552.2	83.28	3e-54	216
on.mrna.LG1.144.6	m.5977	ENSDART00000109552.2	82.66	3e-88	329
on.mrna.LG1.145.1	m.2091	ENSDART00000121431.1	79.3	3e-29	131
on.mrna.LG1.145.2	m.2090	ENSDART00000121431.1	79.3	3e-29	131
on.mrna.LG1.146.1	m.2719	ENSDART00000109344.3	89.39	6e-12	75.8
on.mrna.LG1.146.1	m.2720	ENSDART00000140576.2	100	7.2	34.2
on.mrna.LG1.146.2	m.2698	ENSDART00000109344.3	89.39	5e-12	75.8
on.mrna.LG1.146.2	m.2699	ENSDART00000140576.2	100	5.8	34.2
on.mrna.LG1.146.3	m.2708	ENSDART00000109164.3	92.86	0.21	40.1
on.mrna.LG1.146.3	m.2709	ENSDART00000140576.2	100	5.8	34.2
on.mrna.LG1.1460001.1	m.885	ENSDART00000109344.3	92.59	0.091	38.2
on.mrna.LG1.147.1	m.95	ENSDART00000102118.4	80.6	5e-48	192
on.mrna.LG1.147.2	m.96	ENSDART00000077744.4	80.58	4e-45	182
on.mrna.LG1.148.1	m.1250	ENSDART00000037986.7	86.36	0.057	40.1
on.mrna.LG1.148.2	m.1253	ENSDART00000037986.7	85.11	0.17	38.2
on.mrna.LG1.148.3	m.1249	ENSDART00000162181.1	100	0.51	36.2
on.mrna.LG1.148.4	m.1252	ENSDART00000162181.1	100	0.51	36.2
on.mrna.LG1.149.1	m.365	ENSDART00000013066.7	83.37	0	922
on.mrna.LG1.149.2	m.366	ENSDART00000013066.7	83.28	0	880
on.mrna.LG1.15.1	m.2371	ENSDART00000122929.3	79.23	1e-47	192
on.mrna.LG1.15.2	m.2387	ENSDART00000122929.3	79.23	1e-47	192
on.mrna.LG1.15.3	m.2379	ENSDART00000092919.4	80.38	1e-43	178
on.mrna.LG1.15.4	m.2381	ENSDART00000122929.3	79.23	1e-47	192
on.mrna.LG1.15.5	m.2385	ENSDART00000122929.3	79.23	1e-47	192
on.mrna.LG1.15.6	m.2377	ENSDART00000122929.3	79.23	1e-47	192
on.mrna.LG1.15.7	m.2375	ENSDART00000122929.3	79.23	9e-48	192
on.mrna.LG1.15.8	m.2373	ENSDART00000122929.3	79.23	8e-48	192
on.mrna.LG1.15.9	m.2383	ENSDART00000122929.3	79.23	8e-48	192
on.mrna.LG1.150.1	m.5286	ENSDART00000144335.1	77.43	2e-15	85.7
on.mrna.LG1.150.2	m.5285	ENSDART00000144335.1	77.43	1e-15	85.7
on.mrna.LG1.151.1	m.2682	ENSDART00000168973.1	83.54	6e-23	111
on.mrna.LG1.152.1	m.3693	ENSDART00000128415.2	100	4.1	32.2
on.mrna.LG1.154.1	m.272	ENSDART00000122042.2	82.48	3e-14	81.8
on.mrna.LG1.155.1	m.5519	ENSDART00000025031.9	94.03	2e-20	101
on.mrna.LG1.1550001.1	m.5396	ENSDART00000092290.4	87.71	2e-44	182
on.mrna.LG1.1550002.1	m.3969	ENSDART00000092290.4	87.71	2e-44	182
on.mrna.LG1.156.1	m.4564	ENSDART00000144511.2	100	0.35	36.2
on.mrna.LG1.1580001.1	m.483	ENSDART00000052912.6	79.86	1e-39	167
on.mrna.LG1.159.1	m.3408	ENSDART00000028955.4	78.9	1e-23	113
on.mrna.LG1.159.2	m.3404	ENSDART00000028955.4	87.32	9e-11	69.9
on.mrna.LG1.159.3	m.3406	ENSDART00000028955.4	86.36	1e-19	99.6
on.mrna.LG1.16.1	m.2892	ENSDART00000158160.1	90.54	9e-72	274
on.mrna.LG1.160.1	m.1687	ENSDART00000139900.3	87.64	2e-16	89.7
on.mrna.LG1.161.1	m.4865	ENSDART00000139900.3	78.34	3e-15	83.8
on.mrna.LG1.163.1	m.4293	ENSDART00000144829.1	100	8.4	32.2
on.mrna.LG1.164.1	m.2406	ENSDART00000155592.2	81.2	4e-76	287
on.mrna.LG1.165.1	m.2952	ENSDART00000172178.1	95.65	0.6	38.2
on.mrna.LG1.166.1	m.880	ENSDART00000033980.6	84.93	0	706
on.mrna.LG1.166.2	m.870	ENSDART00000033980.6	84.79	8e-127	454
on.mrna.LG1.166.3	m.866	ENSDART00000033980.6	84.79	8e-127	454
on.mrna.LG1.166.4	m.882	ENSDART00000033980.6	84.79	8e-127	454
on.mrna.LG1.166.5	m.874	ENSDART00000033980.6	84.79	8e-127	454
on.mrna.LG1.166.6	m.876	ENSDART00000160139.1	83.56	2e-171	603
on.mrna.LG1.166.7	m.878	ENSDART00000160139.1	83.56	2e-171	603
on.mrna.LG1.166.8	m.872	ENSDART00000033980.6	84.62	2e-148	525
on.mrna.LG1.166.9	m.868	ENSDART00000033980.6	84.13	1e-72	274
on.mrna.LG1.1660001.1	m.4980	ENSDART00000168416.1	81.81	4e-130	466
on.mrna.LG1.167.1	m.4849	ENSDART00000087797.4	76.65	7e-16	87.7
on.mrna.LG1.168.1	m.5352	ENSDART00000160843.1	79.45	6e-145	515
on.mrna.LG1.168.2	m.5358	ENSDART00000160843.1	79.8	0	670
on.mrna.LG1.168.3	m.5348	ENSDART00000160843.1	79.66	1e-158	561
on.mrna.LG1.168.4	m.5354	ENSDART00000160843.1	79.8	0	670
on.mrna.LG1.169.1	m.5279	ENSDART00000124242.3	90.91	0.017	42.1
on.mrna.LG1.169.2	m.5278	ENSDART00000101664.4	92.59	0.19	38.2
on.mrna.LG1.17.1	m.292	ENSDART00000160072.1	77.79	2e-40	168
on.mrna.LG1.17.2	m.299	ENSDART00000160072.1	77.79	2e-40	168
on.mrna.LG1.17.3	m.303	ENSDART00000160072.1	77.84	1e-37	159
on.mrna.LG1.17.4	m.289	ENSDART00000160072.1	77.79	1e-40	168
on.mrna.LG1.17.5	m.296	ENSDART00000160072.1	77.79	1e-40	168
on.mrna.LG1.170.1	m.4927	ENSDART00000164081.1	79.23	1e-31	139
on.mrna.LG1.171.1	m.3532	ENSDART00000060968.6	81.58	3e-31	139
on.mrna.LG1.172.1	m.5428	ENSDART00000059861.6	81.61	5e-94	345
on.mrna.LG1.172.2	m.5429	ENSDART00000059861.6	81.23	9e-99	361
on.mrna.LG1.172.3	m.5430	ENSDART00000059861.6	80.34	3e-58	226
on.mrna.LG1.173.1	m.2245	ENSDART00000109529.3	79.9	2e-54	214
on.mrna.LG1.173.10	m.2237	ENSDART00000109529.3	79.9	2e-54	214
on.mrna.LG1.173.11	m.2233	ENSDART00000109529.3	80.3	7e-71	270
on.mrna.LG1.173.2	m.2241	ENSDART00000109529.3	80.3	4e-71	270
on.mrna.LG1.173.3	m.2247	ENSDART00000109529.3	80.3	7e-71	270
on.mrna.LG1.173.4	m.2239	ENSDART00000109529.3	80.3	7e-71	270
on.mrna.LG1.173.5	m.2235	ENSDART00000109529.3	80.3	5e-71	270
on.mrna.LG1.173.6	m.2253	ENSDART00000109529.3	80.3	5e-71	270
on.mrna.LG1.173.6	m.2255	ENSDART00000109529.3	88.89	2e-17	89.7
on.mrna.LG1.173.7	m.2251	ENSDART00000109529.3	80.3	7e-71	270
on.mrna.LG1.173.8	m.2243	ENSDART00000109529.3	80.3	7e-71	270
on.mrna.LG1.173.9	m.2249	ENSDART00000109529.3	80.3	7e-71	270
on.mrna.LG1.174.1	m.4151	ENSDART00000080810.5	100	0.75	36.2
on.mrna.LG1.175.1	m.534	ENSDART00000081743.5	88.31	3e-14	81.8
on.mrna.LG1.175.1	m.535	ENSDART00000081743.5	88.31	3e-14	81.8
on.mrna.LG1.176.1	m.424	ENSDART00000103640.4	100	4.7	34.2
on.mrna.LG1.176.1	m.425	ENSDART00000103640.4	100	4.7	34.2
on.mrna.LG1.176.2	m.428	ENSDART00000103640.4	100	4.7	34.2
on.mrna.LG1.176.2	m.429	ENSDART00000103640.4	100	4.7	34.2
on.mrna.LG1.177.1	m.986	ENSDART00000010092.6	80.78	4e-60	234
on.mrna.LG1.178.1	m.844	ENSDART00000098627.4	82.81	2e-49	198
on.mrna.LG1.179.1	m.5626	ENSDART00000092524.5	80.58	0	765
on.mrna.LG1.179.2	m.5627	ENSDART00000092524.5	81.4	0	1269
on.mrna.LG1.18.1	m.965	ENSDART00000162777.1	84.55	7e-145	515
on.mrna.LG1.180.1	m.1995	ENSDART00000112730.3	80.78	4e-117	424
on.mrna.LG1.180.2	m.1998	ENSDART00000112730.3	80.78	4e-117	424
on.mrna.LG1.180.3	m.2004	ENSDART00000112730.3	80.78	4e-117	424
on.mrna.LG1.180.4	m.2001	ENSDART00000112730.3	80.78	4e-117	424
on.mrna.LG1.181.1	m.5080	ENSDART00000114831.3	91.18	0.004	44.1
on.mrna.LG1.182.1	m.1042	ENSDART00000077790.5	89.74	0.0006	46.1
on.mrna.LG1.182.2	m.1044	ENSDART00000077790.5	89.74	0.0007	46.1
on.mrna.LG1.183.1	m.3574	ENSDART00000152684.2	89.23	3e-12	73.8
on.mrna.LG1.184.1	m.5679	ENSDART00000031635.5	82.51	1e-36	157
on.mrna.LG1.184.2	m.5688	ENSDART00000031635.5	82.51	1e-36	157
on.mrna.LG1.184.3	m.5693	ENSDART00000144406.2	88.18	3e-24	115
on.mrna.LG1.184.4	m.5684	ENSDART00000144406.2	88.18	3e-24	115
on.mrna.LG1.185.1	m.4065	ENSDART00000108579.4	81.66	3e-72	274
on.mrna.LG1.186.1	m.3640	ENSDART00000144606.2	97.44	9e-11	69.9
on.mrna.LG1.187.1	m.363	ENSDART00000081945.3	82.95	3e-48	192
on.mrna.LG1.188.1	m.2679	ENSDART00000020327.8	94.23	5e-14	79.8
on.mrna.LG1.189.1	m.5390	ENSDART00000063150.4	100	0.011	42.1
on.mrna.LG1.19.1	m.19	ENSDART00000098904.3	88.71	2e-30	135
on.mrna.LG1.19.2	m.13	ENSDART00000098904.3	88.71	2e-30	135
on.mrna.LG1.19.3	m.7	ENSDART00000098904.3	88.71	2e-30	135
on.mrna.LG1.19.4	m.1	ENSDART00000098904.3	88.71	2e-30	135
on.mrna.LG1.190.1	m.4278	ENSDART00000084069.4	100	0.15	38.2
on.mrna.LG1.190.2	m.4282	ENSDART00000084069.4	100	0.23	38.2
on.mrna.LG1.190.3	m.4284	ENSDART00000084069.4	100	0.15	38.2
on.mrna.LG1.190.4	m.4280	ENSDART00000084069.4	100	0.23	38.2
on.mrna.LG1.191.1	m.414	ENSDART00000085203.5	96.15	0.003	44.1
on.mrna.LG1.191.2	m.406	ENSDART00000085203.5	96.15	0.004	44.1
on.mrna.LG1.192.1	m.2814	ENSDART00000168816.1	88.42	3e-20	101
on.mrna.LG1.193.1	m.4568	ENSDART00000126093.2	81.02	3e-32	141
on.mrna.LG1.194.1	m.1130	ENSDART00000132379.1	86.08	2e-10	69.9
on.mrna.LG1.194.10	m.1229	ENSDART00000132379.1	86.08	2e-10	69.9
on.mrna.LG1.194.11	m.1197	ENSDART00000132379.1	86.08	2e-10	69.9
on.mrna.LG1.194.12	m.1137	ENSDART00000132379.1	86.08	2e-10	69.9
on.mrna.LG1.194.13	m.1148	ENSDART00000132379.1	86.08	2e-10	69.9
on.mrna.LG1.194.14	m.1121	ENSDART00000132379.1	86.08	2e-10	69.9
on.mrna.LG1.194.15	m.1233	ENSDART00000132379.1	86.08	2e-10	69.9
on.mrna.LG1.194.16	m.1108	ENSDART00000132379.1	86.08	2e-10	69.9
on.mrna.LG1.194.17	m.1073	ENSDART00000132379.1	86.08	2e-10	69.9
on.mrna.LG1.194.18	m.1091	ENSDART00000132379.1	86.08	2e-10	69.9
on.mrna.LG1.194.19	m.1110	ENSDART00000132379.1	86.08	2e-10	69.9
on.mrna.LG1.194.2	m.1094	ENSDART00000132379.1	86.08	2e-10	69.9
on.mrna.LG1.194.20	m.1088	ENSDART00000132379.1	86.08	2e-10	69.9
on.mrna.LG1.194.21	m.1183	ENSDART00000132379.1	86.08	2e-10	69.9
on.mrna.LG1.194.22	m.1116	ENSDART00000132379.1	86.08	2e-10	69.9
on.mrna.LG1.194.23	m.1214	ENSDART00000132379.1	86.08	2e-10	69.9
on.mrna.LG1.194.24	m.1154	ENSDART00000132379.1	86.08	2e-10	69.9
on.mrna.LG1.194.25	m.1235	ENSDART00000132379.1	86.08	2e-10	69.9
on.mrna.LG1.194.26	m.1134	ENSDART00000132379.1	86.08	2e-10	69.9
on.mrna.LG1.194.27	m.1207	ENSDART00000132379.1	86.08	2e-10	69.9
on.mrna.LG1.194.28	m.1179	ENSDART00000132379.1	86.08	2e-10	69.9
on.mrna.LG1.194.29	m.1167	ENSDART00000132379.1	86.08	2e-10	69.9
on.mrna.LG1.194.3	m.1203	ENSDART00000132379.1	86.08	2e-10	69.9
on.mrna.LG1.194.30	m.1079	ENSDART00000132379.1	86.08	2e-10	69.9
on.mrna.LG1.194.31	m.1102	ENSDART00000132379.1	86.08	2e-10	69.9
on.mrna.LG1.194.32	m.1173	ENSDART00000132379.1	86.08	2e-10	69.9
on.mrna.LG1.194.33	m.1070	ENSDART00000132379.1	86.08	2e-10	69.9
on.mrna.LG1.194.34	m.1238	ENSDART00000132379.1	86.08	2e-10	69.9
on.mrna.LG1.194.35	m.1191	ENSDART00000132379.1	86.08	2e-10	69.9
on.mrna.LG1.194.36	m.1151	ENSDART00000132379.1	86.08	2e-10	69.9
on.mrna.LG1.194.37	m.1076	ENSDART00000132379.1	86.08	2e-10	69.9
on.mrna.LG1.194.38	m.1105	ENSDART00000132379.1	86.08	2e-10	69.9
on.mrna.LG1.194.39	m.1158	ENSDART00000132379.1	86.08	2e-10	69.9
on.mrna.LG1.194.4	m.1218	ENSDART00000132379.1	86.08	2e-10	69.9
on.mrna.LG1.194.40	m.1140	ENSDART00000132379.1	86.08	2e-10	69.9
on.mrna.LG1.194.41	m.1188	ENSDART00000132379.1	86.08	2e-10	69.9
on.mrna.LG1.194.42	m.1119	ENSDART00000132379.1	86.08	2e-10	69.9
on.mrna.LG1.194.43	m.1226	ENSDART00000132379.1	86.08	2e-10	69.9
on.mrna.LG1.194.44	m.1164	ENSDART00000132379.1	86.08	2e-10	69.9
on.mrna.LG1.194.45	m.1146	ENSDART00000132379.1	86.08	2e-10	69.9
on.mrna.LG1.194.46	m.1086	ENSDART00000132379.1	86.08	2e-10	69.9
on.mrna.LG1.194.47	m.1113	ENSDART00000132379.1	86.08	2e-10	69.9
on.mrna.LG1.194.48	m.1210	ENSDART00000132379.1	86.08	2e-10	69.9
on.mrna.LG1.194.49	m.1098	ENSDART00000132379.1	86.08	2e-10	69.9
on.mrna.LG1.194.5	m.1124	ENSDART00000132379.1	86.08	2e-10	69.9
on.mrna.LG1.194.50	m.1127	ENSDART00000132379.1	86.08	2e-10	69.9
on.mrna.LG1.194.51	m.1083	ENSDART00000132379.1	86.08	2e-10	69.9
on.mrna.LG1.194.52	m.1222	ENSDART00000132379.1	86.08	2e-10	69.9
on.mrna.LG1.194.53	m.1170	ENSDART00000132379.1	86.08	2e-10	69.9
on.mrna.LG1.194.54	m.1194	ENSDART00000132379.1	86.08	2e-10	69.9
on.mrna.LG1.194.55	m.1186	ENSDART00000132379.1	86.08	2e-10	69.9
on.mrna.LG1.194.6	m.1161	ENSDART00000132379.1	86.08	2e-10	69.9
on.mrna.LG1.194.7	m.1176	ENSDART00000132379.1	86.08	2e-10	69.9
on.mrna.LG1.194.8	m.1200	ENSDART00000132379.1	86.08	2e-10	69.9
on.mrna.LG1.194.9	m.1142	ENSDART00000132379.1	86.08	2e-10	69.9
on.mrna.LG1.1940001.1	m.853	ENSDART00000075584.4	78.52	1e-11	71.9
on.mrna.LG1.195.1	m.4261	ENSDART00000114975.3	87.8	0.025	42.1
on.mrna.LG1.195.1	m.4262	ENSDART00000114975.3	87.8	0.025	42.1
on.mrna.LG1.196.1	m.3571	ENSDART00000046094.5	81.74	1e-66	254
on.mrna.LG1.196.2	m.3572	ENSDART00000046094.5	81.74	1e-66	254
on.mrna.LG1.197.1	m.3394	ENSDART00000042984.6	88.14	4e-08	61.9
on.mrna.LG1.197.2	m.3399	ENSDART00000042984.6	88.14	5e-08	61.9
on.mrna.LG1.1970001.1	m.3374	ENSDART00000131664.2	96.3	0.001	46.1
on.mrna.LG1.1970001.2	m.3375	ENSDART00000131664.2	96.3	0.001	46.1
on.mrna.LG1.198.1	m.4141	ENSDART00000016417.8	87.8	1e-65	250
on.mrna.LG1.198.1	m.4142	ENSDART00000016417.8	87.8	1e-65	250
on.mrna.LG1.198.2	m.4138	ENSDART00000016417.8	87.8	1e-65	250
on.mrna.LG1.198.2	m.4139	ENSDART00000016417.8	87.8	1e-65	250
on.mrna.LG1.198.3	m.4135	ENSDART00000016417.8	87.8	1e-65	250
on.mrna.LG1.198.3	m.4136	ENSDART00000016417.8	87.8	1e-65	250
on.mrna.LG1.199.1	m.962	ENSDART00000073735.2	80.37	2e-78	293
on.mrna.LG1.199.2	m.963	ENSDART00000073735.2	81.22	7e-50	198
on.mrna.LG1.199.3	m.964	ENSDART00000073735.2	80.37	2e-78	293
on.mrna.LG1.2.1	m.5486	ENSDART00000084530.5	80.43	3e-62	240
on.mrna.LG1.2.2	m.5484	ENSDART00000084530.5	79	9e-82	305
on.mrna.LG1.2.3	m.5487	ENSDART00000084530.5	79	9e-82	305
on.mrna.LG1.20.1	m.4640	ENSDART00000067514.5	82.85	4e-94	345
on.mrna.LG1.20.10	m.4642	ENSDART00000067514.5	82.82	2e-81	303
on.mrna.LG1.20.11	m.4638	ENSDART00000067514.5	82.82	2e-81	303
on.mrna.LG1.20.12	m.4634	ENSDART00000006619.7	88.26	9e-74	278
on.mrna.LG1.20.13	m.4629	ENSDART00000006619.7	87.5	8e-24	111
on.mrna.LG1.20.14	m.4633	ENSDART00000006619.7	87.5	9e-24	111
on.mrna.LG1.20.2	m.4631	ENSDART00000067514.5	82.85	6e-94	345
on.mrna.LG1.20.3	m.4639	ENSDART00000067514.5	82.85	4e-94	345
on.mrna.LG1.20.4	m.4632	ENSDART00000067514.5	82.82	1e-81	303
on.mrna.LG1.20.5	m.4641	ENSDART00000067514.5	82.82	1e-81	303
on.mrna.LG1.20.6	m.4637	ENSDART00000067514.5	82.82	2e-81	303
on.mrna.LG1.20.7	m.4630	ENSDART00000067514.5	82.85	6e-94	345
on.mrna.LG1.20.8	m.4635	ENSDART00000134832.1	87.18	2e-24	113
on.mrna.LG1.20.9	m.4636	ENSDART00000134832.1	87.18	2e-24	113
on.mrna.LG1.200.1	m.4024	ENSDART00000109534.3	86.54	3e-18	95.6
on.mrna.LG1.200.2	m.4031	ENSDART00000109534.3	86.54	2e-18	95.6
on.mrna.LG1.200.3	m.4035	ENSDART00000109534.3	86.54	2e-18	95.6
on.mrna.LG1.201.1	m.3729	ENSDART00000066380.5	88.89	0.035	40.1
on.mrna.LG1.201.2	m.3728	ENSDART00000066380.5	88.89	0.043	40.1
on.mrna.LG1.202.1	m.235	ENSDART00000019270.7	80.75	4e-78	293
on.mrna.LG1.202.2	m.232	ENSDART00000019270.7	81.06	2e-42	174
on.mrna.LG1.202.3	m.237	ENSDART00000019270.7	80.75	3e-78	293
on.mrna.LG1.202.4	m.234	ENSDART00000019270.7	80.75	2e-78	293
on.mrna.LG1.203.1	m.2604	ENSDART00000098976.3	91.18	0.006	44.1
on.mrna.LG1.204.1	m.1541	ENSDART00000037850.7	79.82	5e-114	412
on.mrna.LG1.204.2	m.1545	ENSDART00000037850.7	79.82	5e-114	412
on.mrna.LG1.204.3	m.1543	ENSDART00000037850.7	79.82	5e-114	412
on.mrna.LG1.205.1	m.435	ENSDART00000005033.9	83.12	3e-05	50.1
on.mrna.LG1.206.1	m.3638	ENSDART00000012457.6	100	1.1	34.2
on.mrna.LG1.206.2	m.3639	ENSDART00000012457.6	100	1.4	34.2
on.mrna.LG1.207.1	m.5902	ENSDART00000149478.2	78.42	7e-24	113
on.mrna.LG1.208.1	m.2053	ENSDART00000171736.1	82.2	8e-61	234
on.mrna.LG1.208.2	m.2051	ENSDART00000171736.1	81.63	4e-37	155
on.mrna.LG1.209.1	m.3786	ENSDART00000021009.8	83.76	5e-72	274
on.mrna.LG1.209.2	m.3783	ENSDART00000021009.8	83.76	5e-72	274
on.mrna.LG1.209.3	m.3789	ENSDART00000021009.8	83.76	4e-72	274
on.mrna.LG1.209.4	m.3780	ENSDART00000021009.8	83.76	4e-72	274
on.mrna.LG1.21.1	m.1046	ENSDART00000067512.6	82.91	4e-138	492
on.mrna.LG1.210.1	m.5071	ENSDART00000082780.5	81.3	8e-27	123
[truncated: 51,039 more rows]

## Sheet: Td_Drerio
Onil_transcripID	denovo_trancriptID_QUERY	Drerio_transcriptID_SUBJECT	percentID	eval	bit_score
[truncated: 51,262 more rows]

[truncated: 7 more sheets: Tm_Drerio, Ch_Gaculeatus, Gp_Gaculeatus, Ld_Gaculeatus, Sd_Gaculeatus, Td_Gaculeatus, Tm_Gaculeatus]
