# Supplementary material for: The Role of Alternative Splicing and Differential Gene Expression in Cichlid Adaptive Radiation
Source: Oxford University Press journal article supplement (doi:10.1093/gbe/evx204), 2017-09-26
Supplement: supp_file_5_evx204.xlsx [file supp_file_5_evx204.xlsx]

## Sheet: GO_DE_genes_all
Overrepresented GO terms for genes differentially expressed in all pairwise species comparisons
Biological Process (BP)
term ID	description	frequency	log10 p-value	uniqueness	dispensability	p.value	p.adjust
GO:0006184	(obsolete) GTP catabolic process	0.01036	-1.3457	0.91	0	0.0451128	0.0451128
GO:0006412	translation	0.04698	-5.6162	0.74	0	2.41991e-06	4.83982e-05
GO:0006886	intracellular protein transport	0.00521	-3.5699	0.69	0	0.000269215	0.00269215
GO:0006979	response to oxidative stress	0.00539	-2.308	0.85	0	0.0049204	0.0196816
GO:0007155	cell adhesion	0.00564	-2.1285	0.86	0	0.00743875	0.0230055
GO:0009790	embryo development	0.00084	-2.0941	0.79	0	0.00805193	0.0230055
GO:0007017	microtubule-based process	0.00172	-1.5465	0.85	0.04	0.0284119	0.0430409
GO:0016043	cellular component organization	0.04287	-1.4545	0.84	0.05	0.0351156	0.0430409
GO:0055114	oxidation-reduction process	0.15044	-3.3016	0.84	0.07	0.000499344	0.00332896
GO:0016310	phosphorylation	0.063	-1.8065	0.85	0.1	0.0156135	0.0334757
GO:0090305	nucleic acid phosphodiester bond hydrolysis	0.02508	-2.3545	0.79	0.22	0.00442079	0.0196816
GO:0016192	vesicle-mediated transport	0.00381	-1.4625	0.82	0.27	0.0344747	0.0430409
GO:0009116	nucleoside metabolic process	0.08228	-1.7764	0.76	0.27	0.016734	0.0334757
GO:0000188	inactivation of MAPK activity	3e-05	-1.6953	0.72	0.33	0.0201697	0.0366722
GO:0051103	DNA ligation involved in DNA repair	0.00013	-1.4367	0.75	0.43	0.0365847	0.0430409
GO:0000413	protein peptidyl-prolyl isomerization	0.00268	-1.4767	0.76	0.49	0.0333657	0.0430409
GO:0031017	exocrine pancreas development	1e-05	-1.7763	0.8	0.57	0.0167379	0.0334757
GO:0006418	tRNA aminoacylation for protein translation	0.00967	-1.3762	0.69	0.58	0.0420533	0.0442666
GO:0060047	heart contraction	0.00011	-1.4069	0.8	0.6	0.0391832	0.0435369
GO:0007156	homophilic cell adhesion via plasma membrane adhesion molecules	0.00028	-1.646	0.86	0.65	0.0225944	0.0376573
Cellular Component (CC)
term ID	description	frequency	log10 p-value	uniqueness	dispensability	p.value	p.adjust
GO:0030117	membrane coat	0.00104	-1.9733	0.31	0	0.0106341	0.0212682
GO:0005654	nucleoplasm	0.00221	-1.4333	0.45	0.07	0.0368723	0.0368723
GO:0005737	cytoplasm	0.38159	-1.7159	0.53	0.13	0.0192353	0.0230824
GO:0005581	collagen trimer	0.00057	-1.796	0.37	0.32	0.0159956	0.0230824
GO:0030529	ribonucleoprotein complex	0.06088	-4.011	0.24	0.34	9.7499e-05	0.000584994
GO:0005840	ribosome	0.05756	-2.658	0.19	0.59	0.00219786	0.00659358
Moelcular Function (MF)
term ID	description	frequency	log10 p-value	uniqueness	dispensability	p.value	p.adjust
GO:0003713	transcription coactivator activity	0.00025	-1.4266	0.93	0	0.0374455	0.0449346
GO:0003735	structural constituent of ribosome	0.02608	-3.1564	0.93	0	0.00069759	0.00837108
GO:0004601	peroxidase activity	0.00358	-2.2224	0.91	0	0.00599239	0.0356731
GO:0005488	binding	0.55585	-2.4817	0.97	0	0.00329837	0.026387
GO:0005525	GTP binding	0.01692	-1.8958	0.82	0	0.0127116	0.0357462
GO:0008565	protein transporter activity	0.00605	-1.7812	0.93	0	0.0165501	0.0357462
GO:0008237	metallopeptidase activity	0.00925	-2.1289	0.83	0.02	0.0074319	0.0356731
GO:0016853	isomerase activity	0.03154	-1.7691	0.9	0.03	0.0170177	0.0357462
GO:0004812	aminoacyl-tRNA ligase activity	0.01104	-1.6784	0.87	0.03	0.0209701	0.0359487
GO:0016874	ligase activity	0.03868	-1.3129	0.9	0.03	0.0486519	0.0499804
GO:0016301	kinase activity	0.05084	-1.7616	0.87	0.04	0.0173141	0.0357462
GO:0008009	chemokine activity	6e-05	-1.7495	0.82	0.04	0.0178033	0.0357462
GO:0016491	oxidoreductase activity	0.14657	-1.7098	0.9	0.05	0.0195074	0.0359487
GO:0019843	rRNA binding	0.01664	-1.3012	0.88	0.12	0.0499804	0.0499804
GO:0005509	calcium ion binding	0.00365	-1.7478	0.86	0.15	0.0178731	0.0357462
GO:0004721	phosphoprotein phosphatase activity	0.00228	-2.005	0.74	0.22	0.00988553	0.0357462
GO:0003924	GTPase activity	0.00935	-1.561	0.83	0.26	0.0274789	0.0412184
GO:0005506	iron ion binding	0.02467	-1.513	0.85	0.34	0.0306902	0.0433274
GO:0008017	microtubule binding	0.0006	-1.4402	0.78	0.42	0.0362911	0.0449346
GO:0016772	transferase activity, transferring phosphorus-containing groups	0.09188	-1.3311	0.88	0.44	0.0466552	0.0499804
GO:0000166	nucleotide binding	0.20353	-4.0752	0.82	0.45	8.41008e-05	0.00201842
GO:0042802	identical protein binding	0.00154	-1.3401	0.8	0.52	0.0456983	0.0499804
GO:0004527	exonuclease activity	0.00817	-1.6143	0.77	0.53	0.0243052	0.0388884
GO:0003909	DNA ligase activity	0.00085	-1.4367	0.87	0.54	0.0365847	0.0449346

## Sheet: GO_DE_genes_in8ormore
Overrepresented GO terms for genes differentially expressed in 8 or more pairwise species comparions
Biological Process (BP)
term ID	description	frequency	log10 p-value	uniqueness	dispensability	p.value	p.adjust
GO:0007155	cell adhesion	0.00564	-1.7519	0.96	0	0.0177052	0.0318693
GO:0008654	phospholipid biosynthetic process	0.00857	-2.3638	0.77	0	0.00432713	0.0271583
GO:0040007	growth	0.00083	-1.5572	0.96	0	0.0277204	0.0371862
GO:0007005	mitochondrion organization	0.00046	-1.8228	0.89	0.02	0.0150383	0.0299881
GO:0035125	embryonic anal fin morphogenesis	0	-2.135	0.64	0.03	0.00732825	0.0271583
GO:0015807	L-amino acid transport	0.00041	-2.1436	0.82	0.05	0.00718456	0.0271583
GO:0000375	RNA splicing, via transesterification reactions	0.00037	-2.146	0.84	0.05	0.00714496	0.0271583
GO:0015947	methane metabolic process	0.00034	-1.6635	0.87	0.09	0.021702	0.033798
GO:0005991	trehalose metabolic process	0.00097	-2.124	0.8	0.1	0.00751623	0.0271583
GO:0045454	cell redox homeostasis	0.00596	-1.3113	0.83	0.1	0.0488315	0.0488315
GO:0006779	porphyrin-containing compound biosynthetic process	0.00478	-1.347	0.85	0.18	0.044978	0.0462631
GO:0042438	melanin biosynthetic process	2e-05	-2.144	0.82	0.23	0.00717794	0.0271583
GO:0050936	xanthophore differentiation	0	-1.8104	0.65	0.28	0.0154739	0.0299881
GO:0007528	neuromuscular junction development	4e-05	-1.5088	0.85	0.34	0.0309885	0.0371862
GO:0006814	sodium ion transport	0.00362	-1.9585	0.81	0.39	0.0110027	0.0299881
GO:0061312	BMP signaling pathway involved in heart development	1e-05	-2.135	0.5	0.39	0.00732825	0.0271583
GO:0006493	protein O-linked glycosylation	0.00022	-2.1224	0.77	0.42	0.00754397	0.0271583
GO:0045880	positive regulation of smoothened signaling pathway	2e-05	-1.4183	0.82	0.44	0.0381681	0.0429391
GO:0048246	macrophage chemotaxis	1e-05	-1.8297	0.8	0.45	0.0148013	0.0299881
GO:0055085	transmembrane transport	0.09397	-2.452	0.77	0.45	0.00353183	0.0271583
GO:0035844	cloaca development	0	-1.5173	0.62	0.46	0.0303879	0.0371862
GO:0009166	nucleotide catabolic process	0.04982	-1.6594	0.79	0.48	0.0219079	0.033798
GO:0019432	triglyceride biosynthetic process	2e-05	-1.8233	0.83	0.48	0.015021	0.0299881
GO:0030488	tRNA methylation	0.00209	-1.4209	0.82	0.49	0.0379402	0.0429391
GO:0021955	central nervous system neuron axonogenesis	2e-05	-1.8434	0.52	0.5	0.0143417	0.0299881
GO:0071910	determination of liver left/right asymmetry	0	-1.8425	0.58	0.5	0.0143714	0.0299881
GO:0060034	notochord cell differentiation	0	-1.5187	0.58	0.5	0.0302901	0.0371862
GO:0015746	citrate transport	0.00014	-1.6238	0.83	0.51	0.0237794	0.0342423
GO:0045132	meiotic chromosome segregation	6e-05	-1.6472	0.84	0.53	0.022532	0.033798
GO:0016126	sterol biosynthetic process	6e-05	-1.5404	0.8	0.56	0.0288138	0.0371862
GO:0042476	odontogenesis	7e-05	-1.3471	0.57	0.56	0.0449676	0.0462631
GO:0015813	L-glutamate transport	0.00025	-2.1436	0.82	0.57	0.00718456	0.0271583
GO:0002063	chondrocyte development	2e-05	-1.8006	0.56	0.61	0.0158271	0.0299881
GO:0070588	calcium ion transmembrane transport	0.00036	-1.8555	0.8	0.61	0.0139476	0.0299881
GO:0045165	cell fate commitment	0.00021	-1.6631	0.58	0.61	0.021722	0.033798
GO:0001707	mesoderm formation	5e-05	-1.3528	0.57	0.63	0.0443813	0.0462631
Cellular Component (CC)
term ID	description	frequency	log10 p-value	uniqueness	dispensability	p.value	p.adjust
GO:0016020	membrane	0.5172	-2.7654	0.9	0	0.00171633	0.0154469
GO:0033162	melanosome membrane	1e-05	-2.144	0.38	0	0.00717794	0.020443
GO:0035301	Hedgehog signaling complex	0	-2.1074	0.67	0.04	0.00780908	0.020443
GO:0031515	tRNA (m1A) methyltransferase complex	0.00016	-1.6342	0.48	0.2	0.0232167	0.0232167
GO:0005643	nuclear pore	0.00036	-1.9961	0.27	0.28	0.0100902	0.020443
GO:0031305	integral component of mitochondrial inner membrane	2e-05	-1.8251	0.41	0.39	0.0149589	0.020443
GO:0005795	Golgi stack	0.0002	-1.6677	0.34	0.6	0.0214931	0.0232167
GO:0005743	mitochondrial inner membrane	0.02192	-1.9419	0.29	0.61	0.0114314	0.020443
GO:0030139	endocytic vesicle	0.0002	-1.7986	0.4	0.67	0.0159001	0.020443
Molecular Function (MF)
term ID	description	frequency	log10 p-value	uniqueness	dispensability	p.value	p.adjust
GO:0005262	calcium channel activity	0.00018	-2.2263	0.76	0	0.00593882	0.0161221
GO:0016788	hydrolase activity, acting on ester bonds	0.04904	-3.6682	0.84	0	0.000214684	0.00579647
GO:0016716	oxidoreductase activity, acting on paired donors, with incorporation or reduction of molecular oxygen, another compound as one donor, and incorporation of one atom of oxygen	1e-05	-2.144	0.86	0.02	0.00717794	0.0161221
GO:0004655	porphobilinogen synthase activity	0.00037	-2.11	0.91	0.02	0.00776247	0.0161221
GO:0016746	transferase activity, transferring acyl groups	0.0324	-3.163	0.8	0.03	0.000687068	0.00927542
GO:0004095	carnitine O-palmitoyltransferase activity	0	-2.1392	0.79	0.14	0.00725772	0.0161221
GO:0008419	RNA lariat debranching enzyme activity	0	-2.146	0.85	0.15	0.00714496	0.0161221
GO:0008521	acetyl-CoA transporter activity	1e-05	-2.1482	0.85	0.19	0.00710886	0.0161221
GO:0004714	transmembrane receptor protein tyrosine kinase activity	0.00015	-1.42	0.79	0.19	0.0380189	0.041872
GO:0016429	tRNA (adenine-N1-)-methyltransferase activity	0.00025	-1.5193	0.83	0.2	0.0302482	0.0371228
GO:0000030	mannosyltransferase activity	0.00028	-2.1224	0.83	0.2	0.00754397	0.0161221
GO:0004555	alpha,alpha-trehalase activity	0.00025	-2.124	0.83	0.21	0.00751623	0.0161221
GO:0004360	glutamine-fructose-6-phosphate transaminase (isomerizing) activity	0.00047	-1.8007	0.82	0.21	0.0158234	0.0251313
GO:0008235	metalloexopeptidase activity	0.0018	-1.3466	0.85	0.26	0.0450194	0.0467509
GO:0005372	water transmembrane transporter activity	0.0001	-1.3109	0.82	0.28	0.0488765	0.0488765
GO:0046934	phosphatidylinositol-4,5-bisphosphate 3-kinase activity	0	-1.4115	0.83	0.28	0.0387704	0.041872
GO:0005313	L-glutamate transmembrane transporter activity	0.00025	-2.1436	0.78	0.33	0.00718456	0.0161221
GO:0000254	C-4 methylsterol oxidase activity	0	-2.1273	0.85	0.39	0.00745933	0.0161221
GO:0047192	1-alkylglycerophosphocholine O-acetyltransferase activity	0	-2.1161	0.8	0.43	0.0076542	0.0161221
GO:0004135	amylo-alpha-1,6-glucosidase activity	6e-05	-1.6461	0.84	0.49	0.0225892	0.0305586
GO:0008455	alpha-1,6-mannosylglycoprotein 2-beta-N-acetylglucosaminyltransferase activity	1e-05	-1.8595	0.79	0.51	0.0138197	0.0251313
GO:0004521	endoribonuclease activity	0.00445	-1.6452	0.82	0.51	0.022636	0.0305586
GO:0015137	citrate transmembrane transporter activity	0.00015	-1.6238	0.78	0.52	0.0237794	0.0305735
GO:0015049	methane monooxygenase activity	0	-1.6635	0.85	0.53	0.021702	0.0305586
GO:0004169	dolichyl-phosphate-mannose-protein mannosyltransferase activity	2e-05	-1.8278	0.79	0.54	0.0148662	0.0251313
GO:0004366	glycerol-3-phosphate O-acyltransferase activity	0.00025	-1.8233	0.77	0.55	0.015021	0.0251313
GO:0008508	bile acid:sodium symporter activity	0.0004	-1.4397	0.75	0.56	0.0363329	0.041872

## Sheet: GO_DE_exons_all
Overrepresented GO terms for genes with exons differentially expressed in all pairwise species comparisons
Biological Process (BP)
term ID	description	frequency	log10 p-value	uniqueness	dispensability	p.value	p.adjust
GO:0006412	translation	0.04698	-18.202	0.64	0	6.28058e-19	3.14029e-17
GO:0008152	metabolic process	0.82183	-2.0342	0.99	0	0.00924272	0.0200929
GO:0016192	vesicle-mediated transport	0.00381	-3.8705	0.93	0	0.000134741	0.000748561
GO:0042254	ribosome biogenesis	0.01029	-3.3777	0.87	0	0.000419083	0.00190492
GO:0032259	methylation	0.02781	-1.4388	0.96	0.01	0.0364083	0.0419718
GO:0035023	regulation of Rho protein signal transduction	0.00037	-4.4202	0.79	0.03	3.80014e-05	0.000416965
GO:0060041	retina development in camera-type eye	0.00011	-1.7287	0.9	0.03	0.0186767	0.0291823
GO:0016337	single organismal cell-cell adhesion	0.0002	-1.3596	0.93	0.03	0.0436918	0.0455123
GO:0006662	glycerol ether metabolic process	0.0013	-2.2829	0.86	0.05	0.00521315	0.0130329
GO:0044237	cellular metabolic process	0.53874	-1.7553	0.92	0.08	0.0175671	0.028334
GO:0055114	oxidation-reduction process	0.15044	-6.5186	0.88	0.13	3.0297e-07	7.57425e-06
GO:0006888	ER to Golgi vesicle-mediated transport	0.00019	-2.0496	0.9	0.2	0.00892072	0.0200929
GO:0051028	mRNA transport	0.00053	-1.9454	0.92	0.22	0.0113397	0.0226793
GO:0015986	ATP synthesis coupled proton transport	0.0045	-3.5868	0.65	0.26	0.000258941	0.0012947
GO:0045454	cell redox homeostasis	0.00596	-2.8541	0.84	0.26	0.00139927	0.00411549
GO:0043066	negative regulation of apoptotic process	0.00047	-1.667	0.82	0.27	0.0215278	0.0313402
GO:0001666	response to hypoxia	0.00019	-3.1883	0.88	0.27	0.000648187	0.00249303
GO:0043547	positive regulation of GTPase activity	0.0013	-1.5849	0.89	0.28	0.0260076	0.0351454
GO:0016311	dephosphorylation	0.00777	-1.3971	0.84	0.29	0.0400774	0.0430202
GO:0046854	phosphatidylinositol phosphorylation	0.00105	-1.819	0.81	0.3	0.0151705	0.0266962
GO:0006357	regulation of transcription from RNA polymerase II promoter	0.00211	-1.8219	0.71	0.32	0.0150695	0.0266962
GO:0006397	mRNA processing	0.00373	-5.0074	0.75	0.34	9.83105e-06	0.000163851
GO:0051103	DNA ligation involved in DNA repair	0.00013	-1.4297	0.73	0.35	0.0371792	0.0419718
GO:0007229	integrin-mediated signaling pathway	0.00015	-1.6588	0.79	0.38	0.0219381	0.0313402
GO:0016310	phosphorylation	0.063	-4.3799	0.81	0.39	4.16965e-05	0.000416965
GO:0006950	response to stress	0.04119	-1.5148	0.86	0.4	0.0305633	0.039022
GO:0006260	DNA replication	0.01998	-4.1891	0.72	0.42	6.46994e-05	0.000495656
GO:0009617	response to bacterium	0.00092	-1.4323	0.88	0.44	0.0369573	0.0419718
GO:0006396	RNA processing	0.02784	-2.6463	0.73	0.45	0.00225788	0.00627188
GO:0006511	ubiquitin-dependent protein catabolic process	0.00111	-4.1007	0.71	0.45	7.93049e-05	0.000495656
GO:0016568	chromatin modification	0.00086	-3.1262	0.86	0.47	0.000747825	0.0026708
GO:0015914	phospholipid transport	0.00019	-1.3386	0.88	0.48	0.0458564	0.0467923
GO:0006413	translational initiation	0.00267	-3.3135	0.71	0.49	0.000485848	0.00202437
GO:0006096	glycolytic process	0.00522	-1.7954	0.7	0.5	0.0160177	0.0266962
GO:0007021	tubulin complex assembly	2e-05	-1.5095	0.87	0.5	0.0309386	0.039022
GO:0006289	nucleotide-excision repair	0.00245	-2.5103	0.68	0.52	0.00308816	0.00812674
GO:0006414	translational elongation	0.00715	-2.8795	0.69	0.55	0.00131978	0.00411549
GO:0008380	RNA splicing	0.00097	-2.9875	0.77	0.56	0.0010292	0.00343067
GO:0006457	protein folding	0.00863	-4.1024	0.73	0.57	7.89951e-05	0.000495656
GO:0006508	proteolysis	0.03705	-1.8014	0.74	0.58	0.0157979	0.0266962
GO:0006468	protein phosphorylation	0.01206	-1.947	0.64	0.59	0.011298	0.0226793
GO:0006418	tRNA aminoacylation for protein translation	0.00967	-2.0501	0.61	0.61	0.00891046	0.0200929
GO:0055113	epiboly involved in gastrulation with mouth forming second	0	-1.7016	0.9	0.61	0.0198793	0.0301201
GO:0016567	protein ubiquitination	0.00107	-1.9166	0.75	0.61	0.0121171	0.0233022
GO:0016226	iron-sulfur cluster assembly	0.00247	-1.6149	0.81	0.63	0.0242717	0.0337107
GO:0019221	cytokine-mediated signaling pathway	0.00088	-1.4228	0.77	0.64	0.0377746	0.0419718
GO:0046034	ATP metabolic process	0.05374	-1.323	0.69	0.65	0.0475335	0.0475335
GO:0051258	protein polymerization	0.00107	-1.3932	0.84	0.65	0.040439	0.0430202
GO:0030163	protein catabolic process	0.00359	-1.5056	0.74	0.65	0.0312176	0.039022
GO:0048701	embryonic cranial skeleton morphogenesis	4e-05	-1.4415	0.9	0.68	0.0361826	0.0419718
Cellular Component (CC)
term ID	description	frequency	log10 p-value	uniqueness	dispensability	p.value	p.adjust
GO:0000502	proteasome complex	0.00283	-5.5361	0.54	0	2.91005e-06	1.33862e-05
GO:0005575	cellular_component	1	-2.6946	1	0	0.00202023	0.0051628
GO:0005925	focal adhesion	0.00016	-1.4475	0.93	0	0.0356862	0.0390849
GO:0005622	intracellular	0.46136	-9.4584	0.88	0.05	3.48017e-10	2.66813e-09
GO:0005783	endoplasmic reticulum	0.00299	-5.1864	0.51	0.08	6.51028e-06	2.49561e-05
GO:0005737	cytoplasm	0.38159	-7.3747	0.74	0.18	4.21988e-08	2.42643e-07
GO:0005833	hemoglobin complex	0.00014	-1.7299	0.56	0.31	0.0186252	0.0214189
GO:0015935	small ribosomal subunit	0.00714	-3.4926	0.39	0.32	0.000321662	0.00105689
GO:0016272	prefoldin complex	0.00024	-2.1144	0.63	0.32	0.00768422	0.012409
GO:0030131	clathrin adaptor complex	0.00034	-2.2483	0.42	0.33	0.00564547	0.0108205
GO:0005852	eukaryotic translation initiation factor 3 complex	0.00039	-1.7935	0.54	0.33	0.0160879	0.0208428
GO:0005581	collagen trimer	0.00057	-2.2046	0.62	0.34	0.0062431	0.0110455
GO:0000151	ubiquitin ligase complex	0.00066	-2.0919	0.58	0.35	0.00809282	0.012409
GO:0005829	cytosol	0.00807	-1.7616	0.63	0.35	0.0173141	0.0209592
GO:0005839	proteasome core complex	0.00137	-2.405	0.56	0.37	0.0039355	0.00822877
GO:0031105	septin complex	0.00012	-1.7875	0.47	0.38	0.0163117	0.0208428
GO:0030529	ribonucleoprotein complex	0.06088	-11.5017	0.51	0.43	3.14992e-12	3.62241e-11
GO:0005730	nucleolus	0.00143	-3.3893	0.54	0.46	0.000408037	0.00117311
GO:0005856	cytoskeleton	0.00714	-1.3994	0.6	0.48	0.0398658	0.0398658
GO:0005743	mitochondrial inner membrane	0.02192	-2.5539	0.44	0.61	0.00279319	0.00642433
GO:0005739	mitochondrion	0.03808	-1.8198	0.49	0.62	0.0151426	0.0208428
GO:0005815	microtubule organizing center	0.00091	-1.4114	0.59	0.64	0.0387793	0.0398658
GO:0005840	ribosome	0.05756	-15.8761	0.35	0.67	1.33015e-16	3.05935e-15
Molecular Function (MF)
term ID	description	frequency	log10 p-value	uniqueness	dispensability	p.value	p.adjust
GO:0003674	molecular_function	1	-1.6166	1	0	0.0241769	0.0292667
GO:0003735	structural constituent of ribosome	0.02608	-16.1543	0.96	0	7.00971e-17	1.61223e-15
GO:0003824	catalytic activity	0.69295	-1.3076	0.99	0	0.0492493	0.0499574
GO:0004221	(obsolete) ubiquitin thiolesterase activity	3e-05	-3.0449	0.97	0	0.000901779	0.00388892
GO:0004386	helicase activity	0.0117	-6.0022	0.84	0	9.94947e-07	1.37303e-05
GO:0004896	cytokine receptor activity	0.00014	-2.0693	0.96	0	0.00852511	0.0140055
GO:0005089	Rho guanyl-nucleotide exchange factor activity	0.00028	-4.4202	0.96	0	3.80014e-05	0.000291344
GO:0005488	binding	0.55585	-17.9281	0.99	0	1.18005e-18	4.07117e-17
GO:0009055	electron carrier activity	0.02493	-2.8266	0.98	0	0.00149073	0.00489812
GO:0015078	hydrogen ion transmembrane transporter activity	0.01909	-2.7495	0.93	0	0.00178033	0.00558376
GO:0051082	unfolded protein binding	0.00451	-4.6615	0.88	0	2.18022e-05	0.000188044
GO:0019239	deaminase activity	0.00312	-1.8668	0.95	0.02	0.0135894	0.019261
GO:0003899	DNA-directed RNA polymerase activity	0.00493	-2.5103	0.86	0.02	0.00308816	0.00734769
GO:0016881	acid-amino acid ligase activity	0.00545	-3.1565	0.92	0.02	0.000697429	0.00320817
GO:0016853	isomerase activity	0.03154	-3.5145	0.95	0.03	0.000305844	0.00162333
GO:0016616	oxidoreductase activity, acting on the CH-OH group of donors, NAD or NADP as acceptor	0.01929	-2.6801	0.9	0.03	0.00208882	0.00626644
GO:0016874	ligase activity	0.03868	-2.2439	0.95	0.03	0.00570296	0.0103554
GO:0005543	phospholipid binding	0.00064	-2.5217	0.89	0.04	0.00300815	0.00734769
GO:0003743	translation initiation factor activity	0.00232	-3.3135	0.9	0.05	0.000485848	0.00239454
GO:0016787	hydrolase activity	0.21764	-5.0381	0.94	0.05	9.1601e-06	9.02924e-05
GO:0051539	4 iron, 4 sulfur cluster binding	0.01286	-2.4839	0.92	0.05	0.00328171	0.00754793
GO:0005515	protein binding	0.02482	-1.3014	0.93	0.06	0.0499574	0.0499574
GO:0016491	oxidoreductase activity	0.14657	-3.5758	0.94	0.07	0.000265583	0.0015271
GO:0016740	transferase activity	0.22118	-2.3256	0.94	0.07	0.00472498	0.00931496
GO:0051287	NAD binding	0.01108	-2.4688	0.88	0.09	0.00339782	0.00756288
GO:0000287	magnesium ion binding	0.02872	-2.0035	0.9	0.13	0.00991973	0.0152103
GO:0004402	histone acetyltransferase activity	0.0001	-1.8083	0.92	0.16	0.0155489	0.0202429
GO:0003676	nucleic acid binding	0.21746	-9.3635	0.9	0.16	4.33012e-10	7.46946e-09
GO:0004842	ubiquitin-protein transferase activity	0.00087	-2.2883	0.9	0.19	0.00514873	0.00975321
GO:0003684	damaged DNA binding	0.00323	-1.9809	0.92	0.2	0.0104496	0.0153409
GO:0016791	phosphatase activity	0.00752	-1.4608	0.87	0.26	0.0346099	0.0385174
GO:0003723	RNA binding	0.0586	-5.5498	0.9	0.28	2.81968e-06	3.24263e-05
GO:0004175	endopeptidase activity	0.01827	-2.8606	0.85	0.28	0.00137848	0.00489812
GO:0005085	guanyl-nucleotide exchange factor activity	0.00061	-2.6273	0.96	0.28	0.00235885	0.00650992
GO:0005096	GTPase activator activity	0.00075	-1.5469	0.96	0.3	0.0283857	0.0331969
GO:0016772	transferase activity, transferring phosphorus-containing groups	0.09188	-2.1437	0.88	0.31	0.0071829	0.0120883
GO:0004713	protein tyrosine kinase activity	0.00043	-2.1834	0.87	0.33	0.00655541	0.011598
GO:0015035	protein disulfide oxidoreductase activity	0.00339	-2.4246	0.91	0.34	0.00376184	0.00796958
GO:0004601	peroxidase activity	0.00358	-1.6871	0.91	0.34	0.0205542	0.0257861
GO:0003995	acyl-CoA dehydrogenase activity	0.00368	-2.6103	0.91	0.34	0.00245301	0.00650992
GO:0008137	NADH dehydrogenase (ubiquinone) activity	0.00693	-1.8113	0.91	0.37	0.0154419	0.0202429
GO:0016627	oxidoreductase activity, acting on the CH-CH group of donors	0.01092	-1.9848	0.9	0.39	0.0103562	0.0153409
GO:0016651	oxidoreductase activity, acting on NAD(P)H	0.01351	-1.339	0.9	0.4	0.0458142	0.0482731
GO:0000166	nucleotide binding	0.20353	-18.9914	0.88	0.42	1.02e-19	7.038e-18
GO:0008270	zinc ion binding	0.03455	-1.5293	0.9	0.46	0.0295597	0.0339937
GO:0003774	motor activity	0.00216	-1.6534	0.86	0.47	0.0222126	0.0273691
GO:0008009	chemokine activity	6e-05	-3.9995	0.9	0.48	0.000100115	0.000690794
GO:0005201	extracellular matrix structural constituent	8e-05	-2.8405	0.96	0.49	0.00144378	0.00489812
GO:0008026	ATP-dependent helicase activity	0.00501	-3.0028	0.85	0.51	0.000993574	0.00403274
GO:0016773	phosphotransferase activity, alcohol group as acceptor	0.04038	-1.8474	0.85	0.51	0.0142102	0.019261
GO:0003909	DNA ligase activity	0.00085	-1.4297	0.93	0.51	0.0371792	0.0407201
GO:0019843	rRNA binding	0.01664	-1.7354	0.89	0.53	0.0183908	0.0234993
GO:0051020	GTPase binding	0.00031	-1.857	0.89	0.53	0.0138995	0.019261
GO:0008565	protein transporter activity	0.00605	-2.034	0.94	0.53	0.00924698	0.0145009
GO:0051087	chaperone binding	0.00074	-1.3125	0.89	0.57	0.0486968	0.0499574
GO:0003779	actin binding	0.0008	-3.5939	0.88	0.58	0.000254742	0.0015271
GO:0016820	hydrolase activity, acting on acid anhydrides, catalyzing transmembrane movement of substances	0.02034	-2.1451	0.81	0.58	0.00715979	0.0120883
GO:0015662	ATPase activity, coupled to transmembrane movement of ions, phosphorylative mechanism	0.00171	-2.5937	0.84	0.59	0.00254859	0.00651306
GO:0046872	metal ion binding	0.15488	-2.4189	0.89	0.59	0.00381154	0.00796958
GO:0004298	threonine-type endopeptidase activity	0.00068	-2.405	0.88	0.6	0.0039355	0.00798675
GO:0004674	protein serine/threonine kinase activity	0.00565	-1.8466	0.85	0.6	0.0142364	0.019261
GO:0004197	cysteine-type endopeptidase activity	0.00102	-2.0398	0.87	0.62	0.00912431	0.0145009
GO:0004714	transmembrane receptor protein tyrosine kinase activity	0.00015	-1.3356	0.86	0.63	0.0461743	0.0482731
GO:0004812	aminoacyl-tRNA ligase activity	0.01104	-2.8562	0.92	0.64	0.00139252	0.00489812
GO:0003887	DNA-directed DNA polymerase activity	0.00591	-1.4986	0.86	0.66	0.0317249	0.0358855
GO:0008234	cysteine-type peptidase activity	0.00221	-2.6326	0.87	0.67	0.00233024	0.00650992
GO:0004672	protein kinase activity	0.01875	-1.549	0.84	0.67	0.0282488	0.0331969
GO:0050660	flavin adenine dinucleotide binding	0.01624	-2.2815	0.86	0.68	0.00522998	0.00975321
GO:0050662	coenzyme binding	0.04565	-1.3886	0.9	0.7	0.0408696	0.0440625

## Sheet: GO_DE_exons_in8ormore
Overrepresented GO terms for genes with exons differentially expressed in 8 or more pairwise species comparions
Biological Process (BP)
term ID	description	frequency	log10 p-value	uniqueness	dispensability	p.value	p.adjust
GO:0009612	response to mechanical stimulus	9e-05	-2.4551	0.88	0	0.00350671	0.0126905
GO:0070831	basement membrane assembly	0	-5.2034	0.78	0	6.26037e-06	0.000106426
GO:0070936	protein K48-linked ubiquitination	3e-05	-2.0587	0.92	0.01	0.00873575	0.0173469
GO:0006937	regulation of muscle contraction	0.0001	-2.4551	0.47	0.03	0.00350671	0.0126905
GO:0006826	iron ion transport	0.00159	-1.8524	0.85	0.04	0.0140475	0.0173469
GO:0050935	iridophore differentiation	0	-1.8904	0.62	0.04	0.0128706	0.0173469
GO:0006874	cellular calcium ion homeostasis	0.00015	-1.9272	0.75	0.18	0.011825	0.0173469
GO:0048384	retinoic acid receptor signaling pathway	3e-05	-1.8451	0.79	0.22	0.0142856	0.0173469
GO:0031023	microtubule organizing center organization	9e-05	-2.428	0.7	0.27	0.0037325	0.0126905
GO:0007045	cell-substrate adherens junction assembly	3e-05	-2.9147	0.77	0.35	0.00121703	0.0103447
GO:0014036	neural crest cell fate specification	0	-1.9621	0.41	0.42	0.0109119	0.0173469
GO:0016203	muscle attachment	0	-1.854	0.51	0.46	0.0139959	0.0173469
GO:0006626	protein targeting to mitochondrion	0.00013	-2.2826	0.73	0.51	0.00521675	0.0147808
GO:0009617	response to bacterium	0.00092	-1.5943	0.88	0.52	0.0254507	0.0282963
GO:0060788	ectodermal placode formation	1e-05	-1.8951	0.63	0.53	0.0127321	0.0173469
GO:0030182	neuron differentiation	0.00069	-1.4102	0.4	0.59	0.0388866	0.0388866
GO:0060037	pharyngeal system development	1e-05	-1.5746	0.49	0.62	0.0266318	0.0282963
Cellular Component (CC)
term ID	description	frequency	log10 p-value	uniqueness	dispensability	p.value	p.adjust
GO:0005581	collagen trimer	0.00057	-3.3001	0.69	0	0.000501072	0.00501072
GO:0031673	H zone	0	-2.4551	0.45	0	0.00350671	0.0175336
GO:0005793	endoplasmic reticulum-Golgi intermediate compartment	6e-05	-2.1469	0.52	0.15	0.00713017	0.0205707
GO:0048471	perinuclear region of cytoplasm	0.0005	-1.4296	0.58	0.2	0.0371878	0.0464847
GO:0016529	sarcoplasmic reticulum	6e-05	-1.9728	0.48	0.23	0.0106463	0.0205707
GO:0005853	eukaryotic translation elongation factor 1 complex	7e-05	-2.0231	0.51	0.27	0.009482	0.0205707
GO:0000776	kinetochore	0.00034	-1.7784	0.35	0.3	0.0166571	0.0237959
GO:0016592	mediator complex	0.00046	-1.3646	0.4	0.34	0.0431917	0.0479907
GO:0005741	mitochondrial outer membrane	0.00043	-1.3173	0.42	0.34	0.0481615	0.0481615
GO:0005802	trans-Golgi network	0.00026	-1.9086	0.4	0.55	0.0123424	0.0205707
Molecular Function (MF)
term ID	description	frequency	log10 p-value	uniqueness	dispensability	p.value	p.adjust
GO:0001104	RNA polymerase II transcription cofactor activity	0.00024	-1.3776	0.81	0	0.0419179	0.0463973
GO:0003708	retinoic acid receptor activity	1e-05	-2.138	0.81	0	0.0072778	0.0400279
GO:0003726	double-stranded RNA adenosine deaminase activity	1e-05	-2.543	0.66	0	0.00286418	0.031506
GO:0008199	ferric iron binding	0.00133	-1.8859	0.73	0	0.0130047	0.0463973
GO:0016641	oxidoreductase activity, acting on the CH-NH2 group of donors, oxygen as acceptor	0.00131	-1.508	0.8	0.01	0.0310456	0.0463973
GO:0003746	translation elongation factor activity	0.00464	-1.3321	0.78	0.04	0.0465479	0.0465479
GO:0000062	fatty-acyl-CoA binding	0.00016	-1.6954	0.94	0.1	0.0201651	0.0463973
GO:0005388	calcium-transporting ATPase activity	0.00014	-1.4201	0.7	0.12	0.0380102	0.0463973
GO:0046914	transition metal ion binding	0.07335	-1.4028	0.73	0.34	0.0395549	0.0463973
GO:0004386	helicase activity	0.0117	-1.3749	0.68	0.37	0.0421794	0.0463973
GO:0004000	adenosine deaminase activity	0.00061	-1.642	0.64	0.61	0.0228034	0.0463973
